# Supplementary material for: Analysis of the Antigenic Properties of Membrane Proteins of Mycobacterium tuberculosis
Source: PubMed Central journal article supplement (PMC6395656; doi:10.1038/s41598-019-39402-z), 2019-02-28
Supplement: 41598_2019_39402_MOESM1_ESM.pdf [file 41598_2019_39402_MOESM1_ESM.pdf]

## **Supplementary Information**

### **Analysis of the Antigenic Properties of Membrane Proteins of *Mycobacterium tuberculosis***

**Haifeng LI<sup>1</sup>, Liguo Liu<sup>1</sup>, Wei-jia Zhang<sup>2</sup>, Xiaobing Zhang<sup>1</sup>, Jianhua Zheng<sup>1</sup>, Li Li<sup>1</sup>, Xiuyun Zhu<sup>3</sup>, Qianting Yang<sup>3</sup>, Mingxia Zhang<sup>3</sup>, Haiying Liu<sup>1</sup>\*, Xinchun Chen<sup>4</sup>\*, Qi Jin<sup>1</sup>\***

Contents:

Supplemental table S1,S2,S3,S5,S6,S8,S10

Supplemental fig S4,S7,S9

Membrane proteins were identified by Serological test and Cellular antigen test.

| Locus tag         | Product Length | Protein size | Positio n F | Positio n R | Serological test |        |       |         |       | Cellular antigen test |        |        |         |       |
|-------------------|----------------|--------------|-------------|-------------|------------------|--------|-------|---------|-------|-----------------------|--------|--------|---------|-------|
|                   |                |              |             |             | First            | Second | Third | Average | StDev | First                 | Second | Third  | Average | StDev |
| Rv0563,175-429    | 255            | 12.7         | 175         | 429         | 0.36             | -      | -     | 0.36    | -     | 10.64%                | -      | -      | 10.64%  | -     |
| Rv0103c,1-315     | 279            | 13.5         | 1           | 279         | 0.58             | -      | -     | 0.58    | -     | 33.33%                | 12.12% | 0.40%  | 15.29%  | 0.17  |
| Rv1508A,1-333     | 288            | 13.9         | 13          | 300         | 0.00             | -      | -     | 0.00    | -     | 36.07%                | 3.77%  | 3.02%  | 14.28%  | 0.19  |
| Rv0290,13-384     | 372            | 16.9         | 13          | 384         | 0.60             | -      | -     | 0.60    | -     | 78.72%                | 5.88%  | 32.38% | 39.00%  | 0.37  |
| Rv1363c,385-783   | 396            | 17.8         | 1           | 396         | 1.35             | 0.00   | -     | 0.00    | 0.95  | 32.79%                | 13.07% | 1.89%  | 15.91%  | 0.16  |
| Rv0969,715-1122   | 375            | 17.1         | 4           | 378         | 0.00             | -      | -     | 0.00    | -     | 26.23%                | 3.52%  | 0.00%  | 9.92%   | 0.14  |
| Rv1145,106-546    | 363            | 16.6         | 40          | 402         | 0.47             | -      | -     | 0.47    | -     | 27.74%                | 86.90% | 36.36% | 50.34%  | 0.32  |
| Rv1635c,1222-1668 | 447            | 19.7         | 1237        | 1662        | 0.00             | -      | -     | 0.00    | -     | -                     | -      | -      | -       | -     |
| Rv0402c,118-573   | 399            | 17.9         | 10          | 408         | 0.00             | -      | -     | 0.00    | -     | -                     | -      | -      | -       | -     |
| Rv0507,124-630    | 504            | 21.8         | 1           | 504         | 0.53             | -      | -     | 0.53    | -     | 40.00%                | 34.43% | 6.53%  | 26.99%  | 0.18  |
| Rv1557,1-561      | 561            | 23.9         | 1           | 561         | 0.59             | -      | -     | 0.59    | -     | 27.87%                | 23.45% | 6.53%  | 19.28%  | 0.11  |
| Rv0007,16-591     | 576            | 24.4         | 16          | 591         | 0.00             | -      | -     | 0.00    | -     | -                     | -      | -      | -       | -     |
| Rv0987,142-783    | 609            | 25.6         | 13          | 621         | 0.00             | -      | -     | 0.00    | -     | 51.61%                | 55.74% | 46.09% | 51.15%  | 0.05  |
| Rv1500,1-672      | 561            | 23.9         | 40          | 600         | 0.00             | -      | -     | 0.00    | -     | 59.02%                | 41.30% | 57.04% | 52.45%  | 0.10  |
| Rv0111,1282-2055  | 747            | 30.7         | 10          | 756         | 0.56             | -      | -     | 0.56    | -     | 34.43%                | 7.55%  | 8.04%  | 16.67%  | 0.15  |
| Rv1469,961-1785   | 777            | 31.8         | 13          | 789         | 0.57             | -      | -     | 0.57    | -     | 54.10%                | 10.87% | 4.02%  | 23.00%  | 0.27  |
| Rv1239c,1-924     | 921            | 37.1         | 1           | 921         | 2.32             | 0.30   | -     | 1.31    | 1.43  | 21.74%                | 0.00%  | -      | 10.87%  | 0.15  |
| Rv1783,256-1305   | 1026           | 40.9         | 13          | 1038        | 0.22             | -      | -     | 0.22    | -     | 59.26%                | 54.10% | 46.09% | 53.15%  | 0.07  |
| Rv0507,1192-2280  | 1083           | 43.0         | 4           | 1086        | 0.48             | -      | -     | 0.48    | -     | 37.70%                | 3.02%  | 3.77%  | 14.83%  | 0.20  |
| Rv0064,922-2937   | 1950           | 74.8         | 1           | 1950        | 5.15             | 0.50   | -     | 2.83    | 3.29  | 10.71%                | -      | -      | 10.71%  | -     |
| Rv1459c,298-600   | 297            | 14.2         | 4           | 300         | 0.00             | -      | -     | 0.00    | -     | 50.82%                | 6.00%  | 21.74% | 26.19%  | 0.23  |
| Rv0210,1150-1476  | 279            | 13.5         | 16          | 294         | 0.00             | -      | -     | 0.00    | -     | 13.04%                | -      | -      | 13.04%  | -     |
| Rv0093c,13-381    | 369            | 16.8         | 13          | 381         | 0.58             | -      | -     | 0.58    | -     | 0.00%                 | 0.00%  | 0.00%  | 0.00%   | 0.00  |
| Rv0713,170-645    | 297            | 13.5         | 22          | 318         | 0.00             | -      | -     | 0.00    | -     | 63.83%                | 10.08% | 37.14% | 37.02%  | 0.27  |
| Rv0226c,1159-1608 | 429            | 19.0         | 1           | 429         | 0.54             | -      | -     | 0.54    | -     | 21.31%                | 2.51%  | 3.77%  | 9.20%   | 0.11  |
| Rv1522c,127-639   | 459            | 20.1         | 10          | 468         | 0.18             | -      | -     | 0.18    | -     | 8.54%                 | -      | -      | 8.54%   | -     |

|                   |      |      |     |      |      |      |      |      |      |        |        |        |        |      |
|-------------------|------|------|-----|------|------|------|------|------|------|--------|--------|--------|--------|------|
| Rv0987,1513-2166  | 653  | 27.3 | 4   | 653  | 0.35 |      |      | 0.35 |      | 26.23% | 3.52%  | 5.66%  | 11.80% | 0.13 |
| Rv0206c,2158-2832 | 576  | 24.4 | 4   | 579  | 0.00 | -    | -    | 0.00 | -    | 21.74% | 0.00%  | -      | 10.87% | 0.15 |
| Rv0528,538-1320   | 765  | 31.4 | 1   | 765  | 0.33 | -    | -    | 0.33 | -    | 22.67% | 4.52%  | 0.00%  | 8.06%  | 0.12 |
| Rv1069c,640-1743  | 1104 | 43.8 | 640 | 1743 | 1.10 | 0.00 | -    | 0.00 | 0.78 | 57.45% | 3.36%  | 19.05% | 26.62% | 0.28 |
| Rv1522c,1210-2475 | 1260 | 49.5 | 4   | 1263 | 1.27 | 0.00 | -    | 0.00 | 0.90 | 21.31% | 4.02%  | 5.66%  | 10.33% | 0.10 |
| Rv0284,1465-2805  | 1194 | 47.1 | 7   | 1200 | 0.67 | -    | -    | 0.67 | -    | 76.19% | 0.81%  | 8.48%  | 28.49% | 0.41 |
| Rv0876c,1-333     | 297  | 14.2 | 31  | 327  | 0.00 | -    | -    | 0.00 | -    | 9.43%  | -      | -      | 9.43%  | -    |
| Rv0908,244-642    | 384  | 17.4 | 1   | 384  | 1.37 | 0.00 | -    | 0.00 | 0.97 | 16.39% | -      | -      | 16.39% | -    |
| Rv0076c,1-291     | 288  | 13.9 | 1   | 288  | 0.53 | -    | -    | 0.53 | -    | -      | -      | -      | -      | -    |
| Rv1795,1-405      | 387  | 17.5 | 1   | 387  | 0.71 | -    | -    | 0.71 | -    | 18.03% | -      | -      | 18.03% | -    |
| Rv0412c,784-1227  | 393  | 17.7 | 31  | 423  | 0.00 | -    | -    | 0.00 | -    | 55.74% | 19.57% | 4.52%  | 26.61% | 0.26 |
| Rv1431,1180-1767  | 549  | 23.4 | 13  | 561  | 1.09 | 0.00 | -    | 0.00 | 0.77 | 39.34% | 8.54%  | 1.89%  | 16.59% | 0.20 |
| Rv0051,244-540    | 297  | 14.2 | 244 | 540  | 0.13 | -    | -    | 0.13 | -    | 59.57% | 12.61% | 20.00% | 30.73% | 0.25 |
| Rv1811,373-702    | 258  | 12.8 | 412 | 669  | 0.83 | -    | -    | 0.83 | -    | 22.16% | 12.61% | 0.00%  | 11.59% | 0.11 |
| Rv0982,142-483    | 321  | 15.1 | 151 | 471  | 1.13 | 0.31 | -    | 0.72 | 0.58 | 38.92% | 10.08% | 45.71% | 31.57% | 0.19 |
| Rv0019c,85-465    | 369  | 16.8 | 91  | 459  | 0.99 | -    | -    | 0.99 | -    | 82.98% | 0.00%  | 19.05% | 34.01% | 0.43 |
| Rv0103c,688-1050  | 363  | 16.6 | 688 | 1050 | 0.71 | -    | -    | 0.71 | -    | 44.68% | 11.76% | 26.67% | 27.70% | 0.16 |
| Rv1030,313-714    | 387  | 17.5 | 322 | 708  | 0.37 | -    | -    | 0.37 | -    | 13.33% | -      | -      | 13.33% | -    |
| Rv1739c,1231-1680 | 432  | 19.1 | 1   | 432  | 0.00 | -    | -    | 0.00 | -    | 9.84%  | -      | -      | 9.84%  | -    |
| Rv1746,991-1422   | 432  | 19.1 | 991 | 1422 | 0.00 | -    | -    | 0.00 | -    | 48.94% | 1.68%  | 34.29% | 28.30% | 0.24 |
| Rv0676c,160-609   | 432  | 19.1 | 1   | 432  | 0.44 | -    | -    | 0.44 | -    | 29.51% | 5.03%  | 3.77%  | 12.77% | 0.15 |
| Rv0450c,139-621   | 459  | 20.1 | 4   | 462  | 0.72 | -    | -    | 0.72 | -    | 4.02%  | -      | -      | 4.02%  | -    |
| Rv0235c,970-1437  | 468  | 20.5 | 970 | 1437 | 0.00 | -    | -    | -    | -    | -      | -      | -      | -      | -    |
| Rv1522c,2893-3438 | 525  | 22.6 | 1   | 525  | 0.00 | -    | -    | 0.00 | -    | 6.03%  | -      | -      | 6.03%  | -    |
| Rv1814,325-900    | 576  | 23.7 | 340 | 897  | 0.11 | -    | -    | 0.11 | -    | -      | -      | -      | -      | -    |
| Rv0996,79-705     | 558  | 23.8 | 31  | 588  | 0.00 | -    | -    | 0.00 | -    | 6.06%  | -      | -      | 6.06%  | -    |
| Rv0394c,88-717    | 579  | 24.5 | 1   | 579  | 0.00 | -    | -    | 0.00 | -    | 26.23% | 5.03%  | 0.00%  | 10.42% | 0.14 |
| Rv0845,619-1263   | 645  | 27.0 | 619 | 1263 | 0.50 | -    | -    | 0.50 | -    | 65.96% | 5.04%  | 43.81% | 38.27% | 0.31 |
| Rv1319c,835-1605  | 723  | 29.8 | 34  | 756  | 1.10 | 0.00 | -    | 0.00 | 0.78 | 24.59% | 5.03%  | 1.89%  | 10.50% | 0.12 |
| Rv0931c,1207-1892 | 720  | 29.7 | 31  | 750  | 1.90 | 1.50 | 1.36 | 1.59 | 0.28 | 3.02%  | -      | -      | 3.02%  | -    |

|                   |      |      |      |      |      |      |      |      |      |        |        |        |        |      |
|-------------------|------|------|------|------|------|------|------|------|------|--------|--------|--------|--------|------|
| Rv0292,238-924    | 687  | 28.5 | 238  | 924  | 0.00 | -    | -    | 0.00 | -    | 61.70% | 2.52%  | 44.76% | 36.33% | 0.30 |
| Rv0103c,1258-2115 | 807  | 32.9 | 4    | 810  | 0.22 | -    | -    | 0.22 | -    | -      | -      | -      | -      | -    |
| Rv1348,1714-2577  | 819  | 33.3 | 4    | 822  | 0.96 | 0.00 | -    | 0.00 | 0.68 | 22.58% | 0.81%  | 9.52%  | 9.30%  | 0.11 |
| Rv0969,1273-2151  | 858  | 34.8 | 1    | 858  | 1.32 | 0.40 | -    | 0.86 | 0.65 | 4.85%  | -      | -      | 4.85%  | -    |
| Rv1320c,832-1701  | 816  | 33.2 | 34   | 849  | 0.52 | -    | -    | 0.52 | -    | 40.98% | 21.38% | 11.56% | 24.64% | 0.15 |
| Rv1348,31-813     | 783  | 32.0 | 31   | 813  | 0.83 | -    | -    | 0.83 | -    | 49.52% | 3.57%  | 6.72%  | 19.94% | 0.26 |
| Rv1349,793-1737   | 930  | 37.4 | 805  | 1734 | 0.11 | -    | -    | 0.11 | -    | 22.62% | 0.81%  | 11.52% | 11.65% | 0.11 |
| Rv0014c,7-954     | 948  | 38.1 | 7    | 954  | 0.96 | -    | -    | 0.96 | -    | 87.23% | 2.52%  | 20.00% | 36.59% | 0.45 |
| Rv1743,43-987     | 945  | 38.0 | 43   | 987  | 1.45 | 0.82 | -    | 1.13 | 0.45 | 38.10% | 0.00%  | 0.84%  | 12.98% | 0.22 |
| Rv1639c,427-1434  | 1008 | 40.3 | 427  | 1434 | 0.00 | -    | -    | 0.00 | -    | 8.70%  | -      | -      | 8.70%  | -    |
| Rv0593,157-1206   | 1011 | 40.4 | 40   | 1050 | 0.00 | -    | -    | 0.00 | -    | 9.43%  | -      | -      | 9.43%  | -    |
| Rv0450c,1213-2253 | 1041 | 41.5 | 1213 | 2253 | 3.19 | 1.03 | 1.26 | 1.83 | 1.19 | 80.85% | 6.72%  | 15.24% | 34.27% | 0.41 |
| Rv0284,2728-3990  | 1164 | 46.0 | 31   | 1194 | 0.46 | -    | -    | 0.46 | -    | 60.87% | 4.67%  | -      | 32.77% | 0.40 |
| Rv1307,79-1317    | 1239 | 48.7 | 79   | 1317 | 2.53 | 0.00 | -    | 0.00 | 1.79 | -      | -      | -      | -      | -    |
| Rv1183,1141-2412  | 1161 | 45.9 | 40   | 1200 | 1.06 | 0.60 | -    | 0.83 | 0.33 | 5.53%  | -      | -      | 5.53%  | -    |
| Rv0284,202-1542   | 1341 | 52.5 | 202  | 1542 | 1.48 | 0.00 | -    | 0.00 | 1.05 | 57.14% | 60.00% | 35.76% | 50.97% | 0.13 |
| Rv0425c,1354-2715 | 1347 | 52.7 | 1    | 1347 | 0.90 | -    | -    | 0.90 | -    | 54.35% | 27.87% | 1.89%  | 28.03% | 0.26 |
| Rv0236c,1270-2664 | 1356 | 53.0 | 19   | 1374 | 2.42 | 0.00 | -    | 0.00 | 1.71 | 29.51% | 5.03%  | 0.00%  | 11.51% | 0.16 |
| Rv0236c,2601-3882 | 3621 | 50.3 | 262  | 3882 | 0.00 | -    | -    | 0.00 | -    | 21.57% | 0.67%  | 0.00%  | 6.74%  | 0.12 |
| Rv2163c,1-279     | 249  | 12.4 | 25   | 273  | 0.63 | -    | -    | 0.63 | -    | 15.22% | -      | -      | 15.22% | -    |
| Rv2772c,184-471   | 255  | 12.7 | 10   | 264  | 0.00 | -    | -    | 0.00 | -    | 13.04% | -      | -      | 13.04% | -    |
| Rv2843,253-543    | 285  | 13.8 | 1    | 285  | 0.00 | -    | -    | 0.00 | -    | 1.21%  | -      | -      | 1.21%  | -    |
| Rv3252c,472-762   | 285  | 13.8 | 472  | 756  | 0.00 | -    | -    | 0.00 | -    | 15.48% | -      | -      | 15.48% | -    |
| Rv2536,397-690    | 270  | 13.2 | 400  | 669  | 0.00 | -    | -    | 0.00 | -    | 2.38%  | -      | -      | 2.38%  | -    |
| Rv3694c,1-303     | 285  | 13.8 | 13   | 297  | 0.00 | -    | -    | 0.00 | -    | 52.17% | 13.11% | 5.66%  | 23.65% | 0.25 |
| Rv2209,1225-1536  | 306  | 14.5 | 4    | 309  | 0.00 | -    | -    | 0.00 | -    | 26.09% | 0.00%  | 0.00%  | 8.70%  | 0.15 |
| Rv2025c,676-996   | 279  | 13.5 | 16   | 294  | 0.00 | -    | -    | 0.00 | -    | 34.78% | 6.56%  | 0.00%  | 13.78% | 0.18 |
| Rv3005c,1-336     | 300  | 14.3 | 7    | 306  | 0.00 | -    | -    | 0.00 | -    | 0.00%  | 0.00%  | 0.00%  | 0.00%  | 0.00 |
| Rv2874,19-348     | 330  | 15.4 | 19   | 348  | 0.20 | -    | -    | 0.20 | -    | -      | -      | -      | -      | -    |
| Rv3448,1-357      | 348  | 16.1 | 4    | 351  | 0.98 | -    | -    | 0.98 | -    | 3.77%  | -      | -      | 3.77%  | -    |

|                   |     |      |      |      |      |      |      |      |      |        |        |        |        |      |
|-------------------|-----|------|------|------|------|------|------|------|------|--------|--------|--------|--------|------|
| Rv0638,1-375      | 336 | 15.6 | 1    | 336  | 0.00 | -    | -    | 0.00 | -    | 15.22% | -      | -      | 15.22% | -    |
| Rv3843c,1-381     | 357 | 16.4 | 1    | 357  | 0.28 | -    | -    | 0.28 | -    | 28.26% | 0.00%  | 0.00%  | 9.42%  | 0.16 |
| Rv2287,1237-1626  | 381 | 17.3 | 4    | 384  | 0.00 | -    | -    | 0.00 | -    | 30.43% | 1.33%  | 1.89%  | 11.22% | 0.17 |
| Rv3870,277-672    | 393 | 17.7 | 1    | 393  | 0.41 | -    | -    | 0.41 | -    | 6.52%  | -      | -      | 6.52%  | -    |
| Rv3887c,1-402     | 390 | 17.6 | 1    | 390  | 1.15 | 0.00 | -    | 0.00 | 0.82 | 6.64%  | -      | -      | 6.64%  | -    |
| Rv3166c,550-957   | 360 | 16.5 | 19   | 378  | 0.95 | -    | -    | 0.95 | -    | 47.83% | 0.67%  | 0.00%  | 16.16% | 0.27 |
| Rv1997,313-738    | 411 | 18.4 | 1    | 411  | 0.00 | -    | -    | 0.00 | -    | 26.09% | 2.00%  | 0.00%  | 9.36%  | 0.15 |
| Rv2942,199-627    | 426 | 18.9 | 1    | 426  | 0.65 | -    | -    | 0.65 | -    | 4.42%  | -      | -      | 4.42%  | -    |
| Rv3743c,385-774   | 390 | 17.6 | 385  | 774  | 0.00 | -    | -    | 0.00 | -    | 70.64% | 22.69% | 52.38% | 48.57% | 0.24 |
| Rv1992c,679-1131  | 426 | 18.9 | 19   | 444  | 0.00 | -    | -    | 0.00 | -    | 78.26% | 17.39% | 13.79% | 36.48% | 0.36 |
| Rv3764c,1-456     | 423 | 18.8 | 34   | 456  | 1.22 | 0.00 | -    | 0.00 | 0.86 | 19.57% | -      | -      | 19.57% | -    |
| Rv3823c,199-657   | 453 | 19.9 | 1    | 453  | 0.51 | -    | -    | 0.51 | -    | 5.45%  | -      | -      | 5.45%  | -    |
| Rv3435c,130-537   | 408 | 18.3 | 130  | 537  | 0.46 | -    | -    | 0.46 | -    | 34.04% | 0.00%  | 31.43% | 21.82% | 0.19 |
| Rv2219,301-720    | 420 | 18.7 | 301  | 720  | 0.51 | -    | -    | 0.51 | -    | 74.47% | 2.52%  | 28.57% | 35.19% | 0.36 |
| Rv3738c,472-945   | 453 | 19.9 | 4    | 456  | 0.00 | -    | -    | 0.00 | -    | 15.15% | -      | -      | 15.15% | -    |
| Rv2625c,688-1179  | 468 | 20.5 | 4    | 471  | 0.72 | -    | -    | 0.72 | -    | 15.48% | -      | -      | 15.48% | -    |
| Rv3737,1-492      | 429 | 19.0 | 16   | 444  | 0.30 | -    | -    | 0.30 | -    | 16.36% | -      | -      | 16.36% | -    |
| Rv3794,103-612    | 483 | 21.0 | 10   | 492  | 0.77 | -    | -    | 0.77 | -    | 25.00% | 5.75%  | 8.48%  | 13.08% | 0.10 |
| Rv2743c,298-810   | 480 | 20.9 | 1    | 480  | 0.87 | -    | -    | 0.87 | -    | 10.30% | -      | -      | 10.30% | -    |
| Rv3000,1-525      | 516 | 22.2 | 4    | 519  | 0.00 | -    | -    | 0.00 | -    | 15.15% | -      | -      | 15.15% | -    |
| Rv3695,400-930    | 459 | 20.1 | 22   | 480  | 0.00 | -    | -    | 0.00 | -    | 16.36% | -      | -      | 16.36% | -    |
| Rv3792,1396-1929  | 507 | 21.9 | 19   | 525  | 0.33 | -    | -    | 0.33 | -    | 6.06%  | -      | -      | 6.06%  | -    |
| Rv3104c,382-924   | 456 | 20.0 | 394  | 849  | 1.65 | 0.45 | -    | 1.05 | 0.85 | 13.10% | -      | -      | 13.10% | -    |
| Rv3793,169-672    | 504 | 21.8 | 169  | 672  | 0.63 | -    | -    | 0.63 | -    | 42.55% | 0.84%  | 12.38% | 18.59% | 0.22 |
| Rv0286,1054-1539  | 486 | 21.1 | 1054 | 1539 | 0.06 | -    | -    | 0.06 | -    | -      | -      | -      | -      | -    |
| Rv1111c,427-981   | 549 | 23.4 | 4    | 552  | 4.50 | 4.00 | 1.64 | 3.38 | 1.53 | 6.67%  | -      | -      | 6.67%  | -    |
| Rv2195,703-1287   | 585 | 24.8 | 703  | 1287 | 0.87 | -    | -    | 0.87 | -    | 40.00% | 10.81% | 0.00%  | 16.94% | 0.21 |
| Rv2869c,358-978   | 600 | 25.3 | 10   | 609  | 0.00 | -    | -    | 0.00 | -    | 5.75%  | -      | -      | 5.75%  | -    |
| Rv2903c,262-882   | 621 | 26.1 | 1    | 621  | 0.63 | -    | -    | 0.63 | -    | 6.19%  | -      | -      | 6.19%  | -    |
| Rv3239c,2524-3144 | 621 | 26.1 | 1    | 621  | 0.00 | -    | -    | 0.00 | -    | 6.19%  | -      | -      | 6.19%  | -    |

|                   |      |      |      |      |      |      |      |      |      |        |        |        |        |      |
|-------------------|------|------|------|------|------|------|------|------|------|--------|--------|--------|--------|------|
| Rv2194,163-768    | 606  | 25.5 | 163  | 768  | 1.39 | 0.00 | -    | 0.00 | 0.98 | 31.91% | 1.68%  | 0.00%  | 11.20% | 0.18 |
| Rv3200c,388-1059  | 672  | 27.9 | 388  | 1059 | 0.76 | -    | -    | 0.76 | -    | 14.89% | -      | -      | 14.89% | -    |
| Rv3805c,1168-1881 | 657  | 27.4 | 10   | 666  | 0.33 | -    | -    | 0.33 | -    | 5.31%  | -      | -      | 5.31%  | -    |
| Rv3365c,193-963   | 747  | 30.7 | 1    | 747  | 0.61 | -    | -    | 0.61 | -    | 2.65%  | -      | -      | 2.65%  | -    |
| Rv3645,841-1647   | 798  | 32.6 | 4    | 801  | 0.31 | -    | -    | 0.31 | -    | 4.85%  | -      | -      | 4.85%  | -    |
| Rv3743c,940-1791  | 786  | 32.1 | 40   | 825  | 0.57 | -    | -    | 0.57 | -    | 3.64%  | -      | -      | 3.64%  | -    |
| Rv2601,712-1569   | 834  | 33.9 | 16   | 849  | 0.00 | -    | -    | 0.00 | -    | 10.30% | -      | -      | 10.30% | -    |
| Rv3428c,262-1140  | 855  | 34.7 | 25   | 879  | 0.23 | -    | -    | 0.23 | -    | 3.10%  | -      | -      | 3.10%  | -    |
| Rv2284,286-1293   | 924  | 37.2 | 31   | 954  | 0.00 | -    | -    | 0.00 | -    | 2.42%  | -      | -      | 2.42%  | -    |
| Rv2874,1090-2067  | 978  | 39.2 | 1090 | 2067 | 0.80 | -    | -    | 0.80 | -    | 59.57% | 5.88%  | 43.81% | 36.42% | 0.28 |
| Rv3239c,1402-2454 | 1041 | 41.5 | 1    | 1041 | 1.09 | 0.40 | -    | 0.75 | 0.49 | 1.21%  | -      | -      | 1.21%  | -    |
| Rv2942,1222-2277  | 1005 | 40.2 | 22   | 1026 | 1.69 | 0.00 | -    | 0.00 | 1.20 | 3.03%  | -      | -      | 3.03%  | -    |
| Rv2587c,97-1152   | 1035 | 41.3 | 16   | 1050 | 1.87 | 1.10 | 1.35 | 1.44 | 0.39 | 1.82%  | -      | -      | 1.82%  | -    |
| Rv2339,1216-2307  | 1092 | 43.3 | 1    | 1092 | 4.50 | 0.00 | -    | 0.00 | 3.18 | 3.64%  | -      | -      | 3.64%  | -    |
| Rv3793,2167-3282  | 1083 | 43.0 | 1    | 1083 | 0.47 | -    | -    | 0.47 | -    | 3.10%  | -      | -      | 3.10%  | -    |
| Rv3835,199-1347   | 1095 | 43.5 | 22   | 1116 | 0.00 | -    | -    | 0.00 | -    | 3.03%  | -      | -      | 3.03%  | -    |
| Rv1854c,1-1152    | 1098 | 43.6 | 1    | 1098 | 1.14 | 0.00 | -    | 0.00 | 0.80 | 3.03%  | -      | -      | 3.03%  | -    |
| Rv2921c,82-1266   | 1158 | 45.8 | 94   | 1251 | 1.01 | 0.50 | -    | 0.75 | 0.36 | 1.21%  | -      | -      | 1.21%  | -    |
| Rv3447c,235-1470  | 1212 | 47.7 | 250  | 1461 | 1.50 | 0.39 | -    | 0.94 | 0.79 | 40.61% | 52.00% | 59.82% | 50.14% | 0.10 |
| Rv0169,103-1362   | 1236 | 48.6 | 124  | 1359 | 3.59 | 1.30 | 1.23 | 2.04 | 1.34 | 6.06%  | -      | -      | 6.06%  | -    |
| Rv3894c,2887-4188 | 1284 | 50.4 | 7    | 1290 | 2.64 | 1.12 | 1.18 | 1.65 | 0.86 | 3.03%  | -      | -      | 3.03%  | -    |
| Rv3479,1378-2739  | 1362 | 53.2 | 1378 | 2739 | 0.00 | -    | -    | -    | -    | 27.57% | 5.88%  | 51.43% | 28.29% | 0.23 |
| Rv3554,640-2055   | 1308 | 51.3 | 661  | 1968 | 1.05 | 0.00 | -    | 0.00 | 0.74 | 1.77%  | -      | -      | 1.77%  | -    |
| Rv2326c,652-2091  | 1371 | 53.6 | 40   | 1410 | 0.50 | -    | -    | 0.50 | -    | 23.21% | 12.39% | 21.69% | 19.10% | 0.06 |
| Rv3479,1-1455     | 1440 | 56.1 | 16   | 1455 | 0.46 | 0.29 | -    | 0.37 | 0.12 | 65.06% | 3.98%  | 9.52%  | 26.19% | 0.34 |
| Rv3870,796-2187   | 1392 | 54.3 | 796  | 2187 | 1.78 | 0.00 | -    | 0.00 | 1.26 | 70.21% | 1.68%  | 46.67% | 39.52% | 0.35 |
| Rv3365c,1033-2628 | 1524 | 59.2 | 10   | 1533 | 1.60 | 1.20 | 1.38 | 1.39 | 0.20 | 59.04% | 6.64%  | 1.19%  | 22.29% | 0.32 |
| Rv0151c,1-1659    | 1584 | 61.4 | 43   | 1626 | 0.10 | -    | -    | 0.10 | -    | -      | -      | -      | -      | -    |
| Rv2748c,910-2547  | 1638 | 63.4 | 1819 | 3456 | 0.92 | -    | -    | 0.92 | -    | 44.68% | 9.24%  | 27.62% | 27.18% | 0.18 |
| Rv3610c,430-2241  | 1812 | 69.7 | 430  | 2241 | 4.09 | 0.00 | -    | 0.00 | 2.90 | 61.70% | 2.52%  | 17.14% | 27.12% | 0.31 |

|                   |      |      |      |      |      |      |      |      |      |        |        |        |        |      |
|-------------------|------|------|------|------|------|------|------|------|------|--------|--------|--------|--------|------|
| Rv3193c,919-2976  | 2052 | 78.5 | 4    | 2055 | 0.38 | -    | -    | 0.38 | -    | 31.33% | 3.10%  | 3.57%  | 12.66% | 0.16 |
| Rv0083,1558-1857  | 297  | 14.2 | 1    | 297  | 0.00 | -    | -    | 0.00 | -    | 37.35% | 2.65%  | 2.98%  | 14.33% | 0.20 |
| Rv0092,1255-2082  | 828  | 33.7 | 1255 | 2082 | 0.16 | -    | -    | 0.16 | -    | -      | -      | -      | -      | -    |
| Rv0176,574-966    | 393  | 17.7 | 574  | 966  | 1.35 | 0.00 | -    | 0.00 | 0.96 | 48.94% | 4.20%  | 32.38% | 28.51% | 0.23 |
| Rv0200,292-687    | 396  | 17.8 | 1    | 396  | 1.06 | 0.00 | -    | 0.00 | 0.75 | 24.10% | 1.33%  | 1.19%  | 8.87%  | 0.13 |
| Rv0206c,103-555   | 453  | 19.9 | 1    | 453  | 0.66 | -    | -    | 0.66 | -    | 45.78% | 0.88%  | 2.38%  | 16.35% | 0.26 |
| Rv0283,283-1614   | 1323 | 51.8 | 10   | 1332 | 1.89 | 1.91 | 1.51 | 1.77 | 0.23 | 25.22% | 3.10%  | 1.19%  | 9.84%  | 0.13 |
| Rv0312,952-1332   | 381  | 17.3 | 1    | 381  | 0.65 | -    | -    | 0.65 | -    | 9.57%  | -      | -      | 9.57%  | -    |
| Rv0338c,694-2646  | 1938 | 74.4 | 4    | 1941 | 0.86 | -    | -    | 0.86 | -    | -      | -      | -      | -      | -    |
| Rv0362,1-870      | 870  | 35.2 | 1    | 870  | 1.49 | 0.00 | -    | 0.00 | 1.05 | 20.00% | 2.38%  | 0.88%  | 7.76%  | 0.11 |
| Rv0412c,175-612   | 435  | 19.3 | 4    | 438  | 1.22 | 0.00 | -    | 0.00 | 0.86 | 6.09%  | -      | -      | 6.09%  | -    |
| Rv0431,127-492    | 366  | 16.7 | 1    | 366  | 0.66 | -    | -    | 0.66 | -    | 10.43% | -      | -      | 10.43% | -    |
| Rv0497,1-681      | 675  | 28.1 | 7    | 681  | 1.92 | 2.03 | 1.02 | 1.66 | 0.55 | 7.83%  | -      | -      | 7.83%  | -    |
| Rv0676c,1234-2310 | 1077 | 42.8 | 1234 | 2310 | 1.79 | 0.00 | -    | 0.00 | 1.27 | 43.81% | 4.76%  | 14.29% | 20.95% | 0.20 |
| Rv0686,211-795    | 585  | 24.8 | 211  | 795  | 0.00 | -    | -    | 0.00 | -    | 38.10% | 14.89% | 2.52%  | 18.50% | 0.18 |
| Rv0816c,70-420    | 342  | 15.8 | 10   | 351  | 0.47 | -    | -    | 0.47 | -    | 8.70%  | -      | -      | 8.70%  | -    |
| Rv0901,91-525     | 435  | 19.3 | 91   | 525  | 0.78 | -    | -    | 0.78 | -    | 87.23% | 0.84%  | 14.29% | 34.12% | 0.46 |
| Rv0969,1-420      | 420  | 18.7 | 4    | 414  | 0.11 | -    | -    | 0.11 | -    | -      | -      | -      | -      | -    |
| Rv0982,553-1512   | 954  | 38.3 | 7    | 960  | 0.51 | -    | -    | 0.51 | -    | 39.13% | 1.19%  | 2.21%  | 14.18% | 0.22 |
| Rv1115,94-696     | 597  | 25.2 | 4    | 600  | 0.00 | -    | -    | 0.00 | -    | 54.55% | 44.16% | 67.39% | 55.37% | 0.12 |
| Rv1132,1165-1728  | 564  | 24.0 | 1    | 564  | 0.37 | -    | -    | 0.37 | -    | 26.51% | 0.00%  | 5.36%  | 10.62% | 0.14 |
| Rv1318c,835-1623  | 780  | 31.9 | 10   | 789  | 0.41 | -    | -    | 0.41 | -    | 40.96% | 0.83%  | 4.76%  | 15.52% | 0.22 |
| Rv1565c,1297-2187 | 873  | 35.3 | 19   | 891  | 0.81 | -    | -    | 0.81 | -    | 22.89% | 5.95%  | 1.24%  | 10.03% | 0.11 |
| Rv1621c,811-1581  | 762  | 31.2 | 10   | 771  | 1.43 | 1.30 | 0.35 | 1.03 | 0.59 | 28.92% | 10.71% | 0.00%  | 13.21% | 0.15 |
| Rv1635c,1-309     | 309  | 14.6 | 1    | 309  | 0.47 | -    | -    | 0.47 | -    | 30.95% | 36.14% | 2.07%  | 23.05% | 0.18 |
| Rv1736c,1-1257    | 1230 | 48.4 | 28   | 1257 | 0.99 | -    | -    | 0.99 | -    | 57.83% | 8.93%  | 0.41%  | 22.39% | 0.31 |
| Rv1743,1078-1698  | 621  | 26.1 | 1    | 621  | 3.10 | 1.84 | 2.19 | 2.38 | 0.65 | 49.40% | 10.12% | 0.00%  | 19.84% | 0.26 |
| Rv1797,199-1218   | 1020 | 40.7 | 1    | 1020 | 0.35 | -    | -    | 0.35 | -    | 33.73% | 6.55%  | 0.00%  | 13.43% | 0.18 |
| Rv0062,214-1140   | 912  | 36.7 | 13   | 924  | 2.26 | 0.88 | -    | 1.57 | 0.97 | 30.12% | 7.14%  | 0.00%  | 12.42% | 0.16 |
| Rv1625c,607-1329  | 720  | 29.7 | 4    | 723  | 1.43 | 0.00 | -    | 0.00 | 1.01 | 28.92% | 4.17%  | 0.00%  | 11.03% | 0.16 |

|                   |      |      |      |      |      |      |      |      |      |        |        |       |        |      |
|-------------------|------|------|------|------|------|------|------|------|------|--------|--------|-------|--------|------|
| Rv1819c,1063-1917 | 849  | 34.4 | 7    | 855  | 0.57 | -    | -    | 0.57 | -    | 32.53% | 6.55%  | 2.48% | 13.85% | 0.16 |
| Rv1845c,373-843   | 471  | 20.6 | 373  | 843  | 0.28 | -    | -    | 0.28 | -    | 41.90% | 0.00%  | 1.19% | 14.37% | 0.24 |
| Rv1877,1504-2061  | 558  | 23.8 | 1    | 558  | 0.00 | -    | -    | 0.00 | -    | 57.83% | 7.14%  | 0.83% | 21.93% | 0.31 |
| Rv1973,79-480     | 402  | 18.0 | 69   | 402  | 0.00 | -    | -    | -    | -    | -      | -      | -     | -      | -    |
| Rv1997,919-2100   | 1182 | 46.6 | 1    | 1182 | 0.26 | -    | -    | 0.26 | -    | 56.63% | 3.57%  | 2.27% | 20.82% | 0.31 |
| Rv2154c,1216-1572 | 315  | 14.9 | 43   | 357  | 1.85 | 1.67 | 0.25 | 1.26 | 0.87 | 34.94% | 5.36%  | 0.83% | 13.71% | 0.19 |
| Rv2195,1-288      | 288  | 13.9 | 1    | 288  | 0.51 | -    | -    | 0.51 | -    | 34.94% | 6.55%  | 0.41% | 13.97% | 0.18 |
| Rv2200c,430-1077  | 648  | 27.1 | 430  | 1077 | 0.99 | -    | -    | 0.99 | -    | 22.69% | 1.19%  | 6.34% | 10.07% | 0.11 |
| Rv2236c,217-639   | 414  | 18.5 | 7    | 420  | 0.77 | -    | -    | 0.77 | -    | 45.78% | 4.76%  | 0.00% | 16.85% | 0.25 |
| Rv2262c,643-1080  | 411  | 18.4 | 28   | 438  | 0.88 | -    | -    | 0.88 | -    | 12.05% | -      | -     | 12.05% | -    |
| Rv2306A,316-591   | 276  | 13.4 | 316  | 591  | 0.00 | -    | -    | 0.00 | -    | 13.25% | -      | -     | 13.25% | -    |
| Rv2339,151-600    | 450  | 19.8 | 151  | 600  | 2.55 | 0.82 | -    | 1.68 | 1.23 | 7.80%  | -      | -     | 7.80%  | -    |
| Rv2345,85-483     | 399  | 17.9 | 85   | 483  | 0.80 | -    | -    | 0.80 | -    | 14.29% | -      | -     | 14.29% | -    |
| Rv2443,1108-1473  | 354  | 16.3 | 13   | 366  | 0.99 | -    | -    | 0.99 | -    | 59.04% | 1.79%  | 0.41% | 20.41% | 0.33 |
| Rv2643,1072-1494  | 423  | 18.8 | 1072 | 1494 | 0.78 | -    | -    | 0.78 | -    | 11.90% | -      | -     | 11.90% | -    |
| Rv2673,25-333     | 309  | 14.6 | 25   | 333  | 0.51 | -    | -    | 0.51 | -    | 5.88%  | -      | -     | 5.88%  | -    |
| Rv2690c,1498-1971 | 474  | 20.7 | 1498 | 1971 | 0.44 | -    | -    | 0.44 | -    | 13.10% | -      | -     | 13.10% | -    |
| Rv2748c,7-444     | 438  | 19.4 | 7    | 444  | 0.00 | -    | -    | 0.00 | -    | 10.92% | -      | -     | 10.92% | -    |
| Rv3252c,910-1248  | 339  | 15.7 | 1    | 339  | 0.00 | -    | -    | 0.00 | -    | 50.60% | 2.38%  | 0.83% | 17.94% | 0.28 |
| Rv3764c,571-1425  | 855  | 34.7 | 571  | 1425 | 0.00 | -    | -    | 0.00 | -    | 2.42%  | -      | -     | 2.42%  | -    |
| Rv3779,1558-1995  | 438  | 19.4 | 1558 | 1995 | 0.48 | -    | -    | 0.48 | -    | 3.57%  | -      | -     | 3.57%  | -    |
| Rv3869,196-1434   | 1239 | 48.7 | 196  | 1434 | 1.38 | 0.22 | -    | 0.80 | 0.82 | 39.76% | 16.67% | 2.07% | 19.50% | 0.19 |
| Rv3877,13-426     | 414  | 18.5 | 13   | 426  | 0.79 | -    | -    | 0.79 | -    | 3.57%  | -      | -     | 3.57%  | -    |
| Rv3894c,265-1653  | 1389 | 54.2 | 19   | 1389 | 0.58 | -    | -    | 0.58 | -    | -      | -      | -     | -      | -    |
| Rv3921c,790-1098  | 309  | 14.6 | 790  | 1098 | 1.03 | 0.17 | -    | 0.60 | 0.61 | 1.46%  | -      | -     | 1.46%  | -    |
| Rv0008c,52-303    | 252  | 12.5 | 52   | 303  | 0.00 | -    | -    | 0.00 | -    | 3.00%  | -      | -     | 3.00%  | -    |
| Rv0392c,181-1413  | 1233 | 48.5 | 181  | 1413 | 0.09 | -    | -    | 0.09 | -    | 2.00%  | -      | -     | 2.00%  | -    |
| Rv0758,100-1443   | 1344 | 52.6 | 100  | 1443 | 0.25 | -    | -    | 0.25 | -    | 6.50%  | -      | -     | 6.50%  | -    |
| Rv0774c,64-795    | 732  | 30.1 | 64   | 795  | 0.54 | -    | -    | 0.54 | -    | 3.60%  | -      | -     | 3.60%  | -    |
| Rv1004c,94-885    | 792  | 32.3 | 94   | 885  | 0.08 | -    | -    | 0.08 | -    | 4.20%  | -      | -     | 4.20%  | -    |



All membrane proteins identified by MS/MS analysis: The nanoACQUITY was controlled by MassLynx version 4.1. Samples of 6  $\mu$ L were loaded on a C18 precolumn (Symmetry C18, 5  $\mu$ m, 180  $\mu$ m X 20 mm) at 10  $\mu$ L/min in 5% acetonitrile, 0.05% FA for 5 min, followed by separation using a C-18 analytical column (Waters ACQUITY UPLC BEH130 C18, 1.7  $\mu$ m, 100  $\mu$ m X 100 mm) at a constant temperature (35°C). A linear gradient of 5 to 35% solvent B over a 40 min period (solvent A, 0.1% formic acid (FA), 3% acetonitrile; solvent B, 97% acetonitrile in 0.1% FA) at a flow rate of 400 nL/min was applied. The peptides were analyzed in the positive ion mode by electrospray ionization (the spray voltage = 2.0 kV). MS data were acquired by a survey scan (m/z 300-1,800, R=60,000 at m/z 400) in the Orbitrap using the lock masses (m/z=445.120025) for internal recalibration in real time (21). The ten most intense peaks for fragmentation in the LTQ were selected with a normalized collision energy value of 35%, dynamic exclusion duration of 30 sec, and ion selection threshold of 500 counts. Precursors with unmatched and single charge states were discarded during data-dependent acquisition. Raw data were acquired using the Xcalibur software v2.2.6 (Thermo). Searching database: 3,988 entries of H37Rv genome and 247 known contaminant protein sequences. Database searching program: MASCOT version 2.2. The following search parameters were applied: max missed cleavage: 1; fixed modification: Carbamidomethylation (C); variable modification: Oxidation (M); Carbamyl (N-term), Deamidated (NQ); Precursor ion mass tolerance:  $\pm$ 50 ppm; fragment mass tolerance:  $\pm$ 0.6 Da. High peptide confidence ( p<0.01) and the false positive rate (FPR) was controlled at under 1%, missed cleavages permitted: 2

| locus tag | Accession | Description | Score    | Coverage | Proteins | Unique Peptide | Peptides | PSMs | AAs | MW [kDa] | calc. pI | Sequence | PSMs | Proteins | Protein Group |
|-----------|-----------|-------------|----------|----------|----------|----------------|----------|------|-----|----------|----------|----------|------|----------|---------------|
| Rv0563,1  | 15607703  | heat shock  | 956.6155 | 24.48    | 1        | 5              | 5        | 28   | 286 | 30.66212 | 9.891113 | AVLGHEI  | 6    | 1        | 1             |
|           |           |             |          |          |          |                |          |      |     |          |          | NAAVccT  | 2    | 1        | 1             |
|           |           |             |          |          |          |                |          |      |     |          |          | AmHAQP'  | 10   | 1        | 1             |
|           |           |             |          |          |          |                |          |      |     |          |          | ELATSAF  | 4    | 1        | 1             |
|           |           |             |          |          |          |                |          |      |     |          |          | LYISDTA  | 2    | 1        | 1             |
|           |           |             |          |          |          |                |          |      |     |          |          | AMHAQP   | 4    | 1        | 1             |
| Rv0103c,  | 15607245  | PROBABI     | 1709.681 | 7.71     | 1        | 5              | 5        | 35   | 752 | 77.46085 | 7.29834  | LDVLGm'  | 7    | 1        | 1             |
|           |           |             |          |          |          |                |          |      |     |          |          | VATIDAV  | 2    | 1        | 1             |
|           |           |             |          |          |          |                |          |      |     |          |          | LDVLGm   | 5    | 1        | 1             |
|           |           |             |          |          |          |                |          |      |     |          |          | IRLDVLG  | 5    | 1        | 1             |
|           |           |             |          |          |          |                |          |      |     |          |          | ASVNFAI  | 5    | 1        | 1             |
|           |           |             |          |          |          |                |          |      |     |          |          | IRLDVLG  | 6    | 1        | 1             |
|           |           |             |          |          |          |                |          |      |     |          |          | aSVNFAT  | 2    | 1        | 1             |
|           |           |             |          |          |          |                |          |      |     |          |          | VATIDAV  | 2    | 1        | 1             |
|           |           |             |          |          |          |                |          |      |     |          |          | AAPVVGI  | 1    | 1        | 1             |
| Rv1508A   | 57116880  | hypothetic  | 1484.56  | 58.33    | 1        | 7              | 7        | 40   | 120 | 13.34061 | 8.938965 | GYVAAG   | 3    | 1        | 1             |
|           |           |             |          |          |          |                |          |      |     |          |          | ELYGLLA  | 13   | 1        | 1             |
|           |           |             |          |          |          |                |          |      |     |          |          | NYRELYC  | 17   | 1        | 1             |
|           |           |             |          |          |          |                |          |      |     |          |          | cADADAI  | 1    | 1        | 1             |

|          |          |          |          |       |   |    |    |    |     |          |          |          |    |   |   |
|----------|----------|----------|----------|-------|---|----|----|----|-----|----------|----------|----------|----|---|---|
|          |          |          |          |       |   |    |    |    |     |          |          | HGETFm1  | 1  | 1 | 1 |
|          |          |          |          |       |   |    |    |    |     |          |          | GADRcAI  | 3  | 1 | 1 |
|          |          |          |          |       |   |    |    |    |     |          |          | HGETFM   | 1  | 1 | 1 |
|          |          |          |          |       |   |    |    |    |     |          |          | HGETFm1  | 1  | 1 | 1 |
| Rv0290,1 | 15607431 | PROBABI  | 710.3699 | 6.14  | 1 | 5  | 5  | 27 | 472 | 47.91373 | 8.880371 | LTEMALI  | 2  | 1 | 1 |
|          |          |          |          |       |   |    |    |    |     |          |          | LTEmALF  | 14 | 1 | 1 |
|          |          |          |          |       |   |    |    |    |     |          |          | VAILADS  | 3  | 1 | 1 |
|          |          |          |          |       |   |    |    |    |     |          |          | EILPAVQ  | 2  | 1 | 1 |
|          |          |          |          |       |   |    |    |    |     |          |          | LTEMALI  | 1  | 1 | 1 |
|          |          |          |          |       |   |    |    |    |     |          |          | LTEmALF  | 3  | 1 | 1 |
|          |          |          |          |       |   |    |    |    |     |          |          | VAILADS  | 2  | 1 | 1 |
| Rv1363c, | 15608503 | POSSIBLE | 1781.495 | 30.27 | 1 | 7  | 7  | 60 | 261 | 28.29089 | 4.843262 | VVTEGTV  | 6  | 1 | 1 |
|          |          |          |          |       |   |    |    |    |     |          |          | QGVINM   | 1  | 1 | 1 |
|          |          |          |          |       |   |    |    |    |     |          |          | VIDSSTG  | 5  | 1 | 1 |
|          |          |          |          |       |   |    |    |    |     |          |          | AAAFAA   | 2  | 1 | 1 |
|          |          |          |          |       |   |    |    |    |     |          |          | VIDSSTG  | 43 | 1 | 1 |
|          |          |          |          |       |   |    |    |    |     |          |          | VTNSAG   | 1  | 1 | 1 |
|          |          |          |          |       |   |    |    |    |     |          |          | vIDSSTGE | 1  | 1 | 1 |
|          |          |          |          |       |   |    |    |    |     |          |          | DDFQQR   | 1  | 1 | 1 |
| Rv0969,7 | 15608109 | PROBABI  | 3537.418 | 12.73 | 1 | 7  | 7  | 54 | 770 | 80.05293 | 9.085449 | VAGATV   | 20 | 1 | 1 |
|          |          |          |          |       |   |    |    |    |     |          |          | ATAVGA   | 17 | 1 | 1 |
|          |          |          |          |       |   |    |    |    |     |          |          | AAVDESt  | 3  | 1 | 1 |
|          |          |          |          |       |   |    |    |    |     |          |          | AAVDESt  | 3  | 1 | 1 |
|          |          |          |          |       |   |    |    |    |     |          |          | IPVDGEV  | 2  | 1 | 1 |
|          |          |          |          |       |   |    |    |    |     |          |          | ATAVGA   | 1  | 1 | 1 |
|          |          |          |          |       |   |    |    |    |     |          |          | EATLLVI  | 4  | 1 | 1 |
|          |          |          |          |       |   |    |    |    |     |          |          | VRPGEKI  | 3  | 1 | 1 |
|          |          |          |          |       |   |    |    |    |     |          |          | vRPGEKII | 1  | 1 | 1 |
| Rv1145,1 | 15608285 | PROBABI  | 4646.512 | 37.29 | 1 | 10 | 10 | 95 | 303 | 32.52512 | 8.265137 | MLIVVTA  | 21 | 1 | 1 |
|          |          |          |          |       |   |    |    |    |     |          |          | mLIVVTA  | 3  | 1 | 1 |
|          |          |          |          |       |   |    |    |    |     |          |          | AGGSAmI  | 14 | 1 | 1 |
|          |          |          |          |       |   |    |    |    |     |          |          | AGGSAM   | 27 | 1 | 1 |
|          |          |          |          |       |   |    |    |    |     |          |          | GGENDA   | 5  | 1 | 1 |
|          |          |          |          |       |   |    |    |    |     |          |          | EVGTDIV  | 15 | 1 | 1 |
|          |          |          |          |       |   |    |    |    |     |          |          | SGLIVVN  | 1  | 1 | 1 |
|          |          |          |          |       |   |    |    |    |     |          |          | GGENDA   | 2  | 1 | 1 |

|                              |          |       |   |   |   |    |     |          |          |  |          |    |   |   |
|------------------------------|----------|-------|---|---|---|----|-----|----------|----------|--|----------|----|---|---|
|                              |          |       |   |   |   |    |     |          |          |  | SPLVYNV  | 2  | 1 | 1 |
|                              |          |       |   |   |   |    |     |          |          |  | AIEVLTD  | 1  | 1 | 1 |
|                              |          |       |   |   |   |    |     |          |          |  | eVGTDIV  | 1  | 1 | 1 |
|                              |          |       |   |   |   |    |     |          |          |  | EVGTDIV  | 1  | 1 | 1 |
|                              |          |       |   |   |   |    |     |          |          |  | aGGSAMI  | 1  | 1 | 1 |
|                              |          |       |   |   |   |    |     |          |          |  | RSPLVYN  | 1  | 1 | 1 |
| Rv1635c, 15608773 Probable c | 741.8994 | 14.75 | 1 | 9 | 9 | 19 | 556 | 59.99709 | 9.817871 |  | SLPDHQV  | 4  | 1 | 1 |
|                              |          |       |   |   |   |    |     |          |          |  | SLPDHQV  | 4  | 1 | 1 |
|                              |          |       |   |   |   |    |     |          |          |  | DKSLPDF  | 2  | 1 | 1 |
|                              |          |       |   |   |   |    |     |          |          |  | SLIDVER  | 1  | 1 | 1 |
|                              |          |       |   |   |   |    |     |          |          |  | cPTLWTL  | 1  | 1 | 1 |
|                              |          |       |   |   |   |    |     |          |          |  | SLIDVER  | 1  | 1 | 1 |
|                              |          |       |   |   |   |    |     |          |          |  | ALLATRF  | 1  | 1 | 1 |
|                              |          |       |   |   |   |    |     |          |          |  | WQFHYS   | 2  | 1 | 1 |
|                              |          |       |   |   |   |    |     |          |          |  | TPVYRFP  | 2  | 1 | 1 |
|                              |          |       |   |   |   |    |     |          |          |  | FPSYLG   | 1  | 1 | 1 |
| Rv0402c, 15607453 CONSERV    | 91.7189  | 4.19  | 1 | 1 | 1 | 2  | 620 | 64.10392 | 5.262207 |  | RPSPLPTI | 2  | 1 | 1 |
| Rv0507,1 15607648 PROBABI    | 4180.997 | 14.05 | 1 | 9 | 9 | 91 | 968 | 106.1333 | 7.151855 |  | HVAHIQL  | 7  | 1 | 1 |
|                              |          |       |   |   |   |    |     |          |          |  | AYVTGP   | 1  | 1 | 1 |
|                              |          |       |   |   |   |    |     |          |          |  | VGQVFGI  | 15 | 1 | 1 |
|                              |          |       |   |   |   |    |     |          |          |  | AHSVSM   | 2  | 1 | 1 |
|                              |          |       |   |   |   |    |     |          |          |  | AHSVSmS  | 2  | 1 | 1 |
|                              |          |       |   |   |   |    |     |          |          |  | AAVVVV   | 45 | 1 | 1 |
|                              |          |       |   |   |   |    |     |          |          |  | aAVVVV   | 1  | 1 | 1 |
|                              |          |       |   |   |   |    |     |          |          |  | HMVDTT   | 3  | 1 | 1 |
|                              |          |       |   |   |   |    |     |          |          |  | AHSVSmS  | 1  | 1 | 1 |
|                              |          |       |   |   |   |    |     |          |          |  | AHSVSM   | 1  | 1 | 1 |
|                              |          |       |   |   |   |    |     |          |          |  | hmVDTTF  | 1  | 1 | 1 |
|                              |          |       |   |   |   |    |     |          |          |  | FYSDLmF  | 3  | 1 | 1 |
|                              |          |       |   |   |   |    |     |          |          |  | HmVDTTI  | 1  | 1 | 1 |
|                              |          |       |   |   |   |    |     |          |          |  | FYSDLMI  | 5  | 1 | 1 |
|                              |          |       |   |   |   |    |     |          |          |  | hVAHIQD  | 1  | 1 | 1 |
|                              |          |       |   |   |   |    |     |          |          |  | fYSDLMR  | 1  | 1 | 1 |
|                              |          |       |   |   |   |    |     |          |          |  | fYSDLmR  | 1  | 1 | 1 |
| Rv1557,1 15608695 PROBABI    | 1014.575 | 38.79 | 1 | 7 | 7 | 23 | 397 | 42.39468 | 6.41748  |  | GTPmAG   | 1  | 1 | 1 |

|          |          |          |         |       |   |    |    |    |     |          |          |          |    |   |   |
|----------|----------|----------|---------|-------|---|----|----|----|-----|----------|----------|----------|----|---|---|
|          |          |          |         |       |   |    |    |    |     |          |          | SVFDTID  | 3  | 1 | 1 |
|          |          |          |         |       |   |    |    |    |     |          |          | ELALAN   | 1  | 1 | 1 |
|          |          |          |         |       |   |    |    |    |     |          |          | mIISHEGI | 4  | 1 | 1 |
|          |          |          |         |       |   |    |    |    |     |          |          | LAAIQPQ  | 5  | 1 | 1 |
|          |          |          |         |       |   |    |    |    |     |          |          | MIISHEGI | 6  | 1 | 1 |
|          |          |          |         |       |   |    |    |    |     |          |          | LFLSADG  | 1  | 1 | 1 |
|          |          |          |         |       |   |    |    |    |     |          |          | NDDSFYI  | 2  | 1 | 1 |
| Rv0007,1 | 15607149 | POSSIBLE | 611.682 | 27.96 | 1 | 9  | 9  | 20 | 304 | 31.05394 | 8.865723 | FISGASAI | 7  | 1 | 1 |
|          |          |          |         |       |   |    |    |    |     |          |          | AATGPGI  | 1  | 1 | 1 |
|          |          |          |         |       |   |    |    |    |     |          |          | GDGPNAI  | 1  | 1 | 1 |
|          |          |          |         |       |   |    |    |    |     |          |          | APQRNP   | 2  | 1 | 1 |
|          |          |          |         |       |   |    |    |    |     |          |          | GDSAAG   | 1  | 1 | 1 |
|          |          |          |         |       |   |    |    |    |     |          |          | IPDAGDP  | 4  | 1 | 1 |
|          |          |          |         |       |   |    |    |    |     |          |          | NPAPARF  | 1  | 1 | 1 |
|          |          |          |         |       |   |    |    |    |     |          |          | APQRNP   | 2  | 1 | 1 |
|          |          |          |         |       |   |    |    |    |     |          |          | NPAPARF  | 1  | 1 | 1 |
| Rv0987,1 | 15608127 | PROBABI  | 4376.6  | 17.78 | 1 | 14 | 14 | 90 | 855 | 93.54572 | 9.83252  | LSDLIIAL | 2  | 1 | 1 |
|          |          |          |         |       |   |    |    |    |     |          |          | LVSGPAC  | 21 | 1 | 1 |
|          |          |          |         |       |   |    |    |    |     |          |          | AMQFMG   | 8  | 1 | 1 |
|          |          |          |         |       |   |    |    |    |     |          |          | AMQFmG   | 6  | 1 | 1 |
|          |          |          |         |       |   |    |    |    |     |          |          | HGYDFS   | 19 | 1 | 1 |
|          |          |          |         |       |   |    |    |    |     |          |          | LSDLIIAL | 2  | 1 | 1 |
|          |          |          |         |       |   |    |    |    |     |          |          | AmQFmG   | 5  | 1 | 1 |
|          |          |          |         |       |   |    |    |    |     |          |          | LSHIDLII | 8  | 1 | 1 |
|          |          |          |         |       |   |    |    |    |     |          |          | IVSGPAG  | 1  | 1 | 1 |
|          |          |          |         |       |   |    |    |    |     |          |          | AFDLSAA  | 1  | 1 | 1 |
|          |          |          |         |       |   |    |    |    |     |          |          | GAPTTV1  | 1  | 1 | 1 |
|          |          |          |         |       |   |    |    |    |     |          |          | hGYDFSA  | 3  | 1 | 1 |
|          |          |          |         |       |   |    |    |    |     |          |          | RHGYDFS  | 2  | 1 | 1 |
|          |          |          |         |       |   |    |    |    |     |          |          | LVSGPAC  | 4  | 1 | 1 |
|          |          |          |         |       |   |    |    |    |     |          |          | aMQFMG   | 1  | 1 | 1 |
|          |          |          |         |       |   |    |    |    |     |          |          | LPAGVRM  | 2  | 1 | 1 |
|          |          |          |         |       |   |    |    |    |     |          |          | YGLAVGI  | 1  | 1 | 1 |
|          |          |          |         |       |   |    |    |    |     |          |          | AFDLSAA  | 1  | 1 | 1 |
|          |          |          |         |       |   |    |    |    |     |          |          | LSHIDLII | 1  | 1 | 1 |
|          |          |          |         |       |   |    |    |    |     |          |          | IQQLPA   | 1  | 1 | 1 |

|          |          |          |          |       |   |    |    |     |     |          |          |          |    |   |   |
|----------|----------|----------|----------|-------|---|----|----|-----|-----|----------|----------|----------|----|---|---|
| Rv1500,1 | 15608638 | PROBABI  | 871.7435 | 21.35 | 1 | 8  | 8  | 27  | 342 | 38.07082 | 8.616699 | LISTGAD  | 2  | 1 | 1 |
|          |          |          |          |       |   |    |    |     |     |          |          | aSALLcDI | 2  | 1 | 1 |
|          |          |          |          |       |   |    |    |     |     |          |          | ASALLcD  | 6  | 1 | 1 |
|          |          |          |          |       |   |    |    |     |     |          |          | NFGPKIH  | 2  | 1 | 1 |
|          |          |          |          |       |   |    |    |     |     |          |          | LmTADY'  | 3  | 1 | 1 |
|          |          |          |          |       |   |    |    |     |     |          |          | LMTADY   | 6  | 1 | 1 |
|          |          |          |          |       |   |    |    |     |     |          |          | LMTADY   | 2  | 1 | 1 |
|          |          |          |          |       |   |    |    |     |     |          |          | GTTYTYF  | 1  | 1 | 1 |
|          |          |          |          |       |   |    |    |     |     |          |          | LmTADY'  | 1  | 1 | 1 |
|          |          |          |          |       |   |    |    |     |     |          |          | RPGGWL   | 1  | 1 | 1 |
| Rv0111,1 | 15607253 | POSSIBLE | 4115.276 | 27.15 | 1 | 15 | 15 | 102 | 685 | 74.3256  | 10.63818 | SLVQHQI  | 1  | 1 | 1 |
|          |          |          |          |       |   |    |    |     |     |          |          | DQPDVAI  | 16 | 1 | 1 |
|          |          |          |          |       |   |    |    |     |     |          |          | ALSIVGS' | 18 | 1 | 1 |
|          |          |          |          |       |   |    |    |     |     |          |          | WTHIGDI  | 21 | 1 | 1 |
|          |          |          |          |       |   |    |    |     |     |          |          | SDGVHLI  | 2  | 1 | 1 |
|          |          |          |          |       |   |    |    |     |     |          |          | EIGLPPG' | 8  | 1 | 1 |
|          |          |          |          |       |   |    |    |     |     |          |          | WSAQVN   | 1  | 1 | 1 |
|          |          |          |          |       |   |    |    |     |     |          |          | DPNRPFT  | 6  | 1 | 1 |
|          |          |          |          |       |   |    |    |     |     |          |          | FIDHTVIC | 6  | 1 | 1 |
|          |          |          |          |       |   |    |    |     |     |          |          | YIGQTL   | 5  | 1 | 1 |
| DPNRPFT  | 6        | 1        | 1        |       |   |    |    |     |     |          |          |          |    |   |   |
| Rv1469,9 | 15608607 | PROBABI  | 2478.672 | 19.63 | 1 | 11 | 11 | 49  | 657 | 67.84259 | 6.63916  | VmVTTV   | 2  | 1 | 1 |
|          |          |          |          |       |   |    |    |     |     |          |          | aLSIVGST | 1  | 1 | 1 |
|          |          |          |          |       |   |    |    |     |     |          |          | GTPYRYI  | 1  | 1 | 1 |
|          |          |          |          |       |   |    |    |     |     |          |          | WSAQVN   | 2  | 1 | 1 |
|          |          |          |          |       |   |    |    |     |     |          |          | AEcDGWI  | 2  | 1 | 1 |
|          |          |          |          |       |   |    |    |     |     |          |          | WETVDR   | 2  | 1 | 1 |
|          |          |          |          |       |   |    |    |     |     |          |          | VMVTTV   | 1  | 1 | 1 |
|          |          |          |          |       |   |    |    |     |     |          |          | LYPEDQF  | 2  | 1 | 1 |
|          |          |          |          |       |   |    |    |     |     |          |          | LLQLAA'  | 23 | 1 | 1 |
|          |          |          |          |       |   |    |    |     |     |          |          | NLQAGGI  | 4  | 1 | 1 |
| LADTSIV  | 2        | 1        | 1        |       |   |    |    |     |     |          |          |          |    |   |   |
| NLQAGGI  | 2        | 1        | 1        |       |   |    |    |     |     |          |          |          |    |   |   |
| RLLQLAA' | 2        | 1        | 1        |       |   |    |    |     |     |          |          |          |    |   |   |
| AVPGcGV  | 3        | 1        | 1        |       |   |    |    |     |     |          |          |          |    |   |   |
| LASVAPL  | 8        | 1        | 1        |       |   |    |    |     |     |          |          |          |    |   |   |

|                            |          |       |   |    |    |    |     |          |          |  |          |    |   |   |
|----------------------------|----------|-------|---|----|----|----|-----|----------|----------|--|----------|----|---|---|
|                            |          |       |   |    |    |    |     |          |          |  | NAGITDV  | 1  | 1 | 1 |
|                            |          |       |   |    |    |    |     |          |          |  | AALLPEÇ  | 1  | 1 | 1 |
|                            |          |       |   |    |    |    |     |          |          |  | RGIAIPPA | 1  | 1 | 1 |
|                            |          |       |   |    |    |    |     |          |          |  | AALLPEÇ  | 1  | 1 | 1 |
|                            |          |       |   |    |    |    |     |          |          |  | RGIAIPPA | 1  | 1 | 1 |
| Rv1239c, 15608379 POSSIBLE | 1161.515 | 37.98 | 1 | 14 | 14 | 29 | 366 | 41.47412 | 5.757324 |  | DVADHQ   | 4  | 1 | 1 |
|                            |          |       |   |    |    |    |     |          |          |  | DVADHQ   | 1  | 1 | 1 |
|                            |          |       |   |    |    |    |     |          |          |  | VGMQQN   | 1  | 1 | 1 |
|                            |          |       |   |    |    |    |     |          |          |  | TGEIMIFV | 1  | 1 | 1 |
|                            |          |       |   |    |    |    |     |          |          |  | TGEImIFV | 1  | 1 | 1 |
|                            |          |       |   |    |    |    |     |          |          |  | TVNYVPI  | 2  | 1 | 1 |
|                            |          |       |   |    |    |    |     |          |          |  | MDADPEI  | 3  | 1 | 1 |
|                            |          |       |   |    |    |    |     |          |          |  | cVNPLST  | 3  | 1 | 1 |
|                            |          |       |   |    |    |    |     |          |          |  | VGmQQN   | 2  | 1 | 1 |
|                            |          |       |   |    |    |    |     |          |          |  | YDETLFL  | 1  | 1 | 1 |
|                            |          |       |   |    |    |    |     |          |          |  | HGEHGGI  | 4  | 1 | 1 |
|                            |          |       |   |    |    |    |     |          |          |  | YLRDVAI  | 1  | 1 | 1 |
|                            |          |       |   |    |    |    |     |          |          |  | YTYAAA   | 1  | 1 | 1 |
|                            |          |       |   |    |    |    |     |          |          |  | LPGKYTY  | 1  | 1 | 1 |
|                            |          |       |   |    |    |    |     |          |          |  | RcVNPLS  | 1  | 1 | 1 |
|                            |          |       |   |    |    |    |     |          |          |  | DFVVTVI  | 1  | 1 | 1 |
|                            |          |       |   |    |    |    |     |          |          |  | KLDIEPIY | 1  | 1 | 1 |
| Rv1783,2 15608921 PROBABI  | 1869.017 | 32.18 | 1 | 13 | 13 | 39 | 435 | 48.5543  | 5.414551 |  | EFAAEQA  | 13 | 1 | 1 |
|                            |          |       |   |    |    |    |     |          |          |  | ETAQESA  | 1  | 1 | 1 |
|                            |          |       |   |    |    |    |     |          |          |  | WFHPAPI  | 4  | 1 | 1 |
|                            |          |       |   |    |    |    |     |          |          |  | ETAQESA  | 1  | 1 | 1 |
|                            |          |       |   |    |    |    |     |          |          |  | TGVIEAL  | 1  | 1 | 1 |
|                            |          |       |   |    |    |    |     |          |          |  | mVSLLE   | 1  | 1 | 1 |
|                            |          |       |   |    |    |    |     |          |          |  | AQFMLm   | 2  | 1 | 1 |
|                            |          |       |   |    |    |    |     |          |          |  | AQFMLm   | 1  | 1 | 1 |
|                            |          |       |   |    |    |    |     |          |          |  | AQFMLM   | 1  | 1 | 1 |
|                            |          |       |   |    |    |    |     |          |          |  | AQFmLml  | 1  | 1 | 1 |
|                            |          |       |   |    |    |    |     |          |          |  | LAEAYEE  | 5  | 1 | 1 |
|                            |          |       |   |    |    |    |     |          |          |  | MVSLLEVI | 1  | 1 | 1 |
|                            |          |       |   |    |    |    |     |          |          |  | DLNFGV   | 1  | 1 | 1 |
|                            |          |       |   |    |    |    |     |          |          |  | WLPHFGI  | 1  | 1 | 1 |

|          |          |         |          |       |   |    |    |     |     |          |          |          |   |   |   |
|----------|----------|---------|----------|-------|---|----|----|-----|-----|----------|----------|----------|---|---|---|
|          |          |         |          |       |   |    |    |     |     |          | YQSVVYI  | 1        | 1 | 1 |   |
|          |          |         |          |       |   |    |    |     |     |          | EQVLGLr  | 1        | 1 | 1 |   |
|          |          |         |          |       |   |    |    |     |     |          | MVYTSV   | 1        | 1 | 1 |   |
|          |          |         |          |       |   |    |    |     |     |          | EQVLGLM  | 1        | 1 | 1 |   |
| Rv0507,1 | 15607648 | PROBABI | 4377.495 | 29.44 | 1 | 24 | 24 | 117 | 968 | 106.1333 | 7.151855 | DRIDDILV | 1 | 1 | 1 |
|          |          |         |          |       |   |    |    |     |     |          | IDDILVQ' | 3        | 1 | 1 |   |
|          |          |         |          |       |   |    |    |     |     |          | DRIDDILV | 1        | 1 | 1 |   |
|          |          |         |          |       |   |    |    |     |     |          | DRIDDILV | 1        | 1 | 1 |   |
|          |          |         |          |       |   |    |    |     |     |          | VFDAAQI  | 4        | 1 | 1 |   |
|          |          |         |          |       |   |    |    |     |     |          | GTPLQGA  | 2        | 1 | 1 |   |
|          |          |         |          |       |   |    |    |     |     |          | IDDILVQ' | 5        | 1 | 1 |   |
|          |          |         |          |       |   |    |    |     |     |          | MYALMC   | 2        | 1 | 1 |   |
|          |          |         |          |       |   |    |    |     |     |          | FVIALEG  | 11       | 1 | 1 |   |
|          |          |         |          |       |   |    |    |     |     |          | SIFDMFD  | 1        | 1 | 1 |   |
|          |          |         |          |       |   |    |    |     |     |          | AQmPPmI  | 3        | 1 | 1 |   |
|          |          |         |          |       |   |    |    |     |     |          | FmPASMf  | 2        | 1 | 1 |   |
|          |          |         |          |       |   |    |    |     |     |          | MYALmG   | 2        | 1 | 1 |   |
|          |          |         |          |       |   |    |    |     |     |          | mYALmG   | 2        | 1 | 1 |   |
|          |          |         |          |       |   |    |    |     |     |          | LNPEVLL  | 4        | 1 | 1 |   |
|          |          |         |          |       |   |    |    |     |     |          | VFDAAQI  | 2        | 1 | 1 |   |
|          |          |         |          |       |   |    |    |     |     |          | LNPEVLL  | 3        | 1 | 1 |   |
|          |          |         |          |       |   |    |    |     |     |          | IDDILVQ' | 2        | 1 | 1 |   |
|          |          |         |          |       |   |    |    |     |     |          | mYALmG   | 6        | 1 | 1 |   |
|          |          |         |          |       |   |    |    |     |     |          | FMPASMI  | 1        | 1 | 1 |   |
|          |          |         |          |       |   |    |    |     |     |          | AQmPPMl  | 8        | 1 | 1 |   |
|          |          |         |          |       |   |    |    |     |     |          | NPVDmL'  | 1        | 1 | 1 |   |
|          |          |         |          |       |   |    |    |     |     |          | KFmPASn  | 2        | 1 | 1 |   |
|          |          |         |          |       |   |    |    |     |     |          | AQMPPM   | 3        | 1 | 1 |   |
|          |          |         |          |       |   |    |    |     |     |          | NPVDML'  | 1        | 1 | 1 |   |
|          |          |         |          |       |   |    |    |     |     |          | DHLADFF  | 14       | 1 | 1 |   |
|          |          |         |          |       |   |    |    |     |     |          | DMMLIW   | 2        | 1 | 1 |   |
|          |          |         |          |       |   |    |    |     |     |          | DMDILITl | 2        | 1 | 1 |   |
|          |          |         |          |       |   |    |    |     |     |          | AQMPPM   | 2        | 1 | 1 |   |
|          |          |         |          |       |   |    |    |     |     |          | LNPEVLL  | 1        | 1 | 1 |   |
|          |          |         |          |       |   |    |    |     |     |          | FmPASmF  | 2        | 1 | 1 |   |
|          |          |         |          |       |   |    |    |     |     |          | AQMPPmI  | 4        | 1 | 1 |   |

|          |          |            |          |       |   |    |    |     |     |          |          |          |    |   |   |
|----------|----------|------------|----------|-------|---|----|----|-----|-----|----------|----------|----------|----|---|---|
|          |          |            |          |       |   |    |    |     |     |          |          | LNPEVLL  | 1  | 1 | 1 |
|          |          |            |          |       |   |    |    |     |     |          |          | HcFDVPL  | 2  | 1 | 1 |
|          |          |            |          |       |   |    |    |     |     |          |          | AITRPLG' | 1  | 1 | 1 |
|          |          |            |          |       |   |    |    |     |     |          |          | DMDILIT  | 2  | 1 | 1 |
|          |          |            |          |       |   |    |    |     |     |          |          | EAIKGTP  | 1  | 1 | 1 |
|          |          |            |          |       |   |    |    |     |     |          |          | mYALmG   | 2  | 1 | 1 |
|          |          |            |          |       |   |    |    |     |     |          |          | NIYHSPG  | 2  | 1 | 1 |
|          |          |            |          |       |   |    |    |     |     |          |          | TTYDLR   | 2  | 1 | 1 |
|          |          |            |          |       |   |    |    |     |     |          |          | DmDILIT  | 1  | 1 | 1 |
|          |          |            |          |       |   |    |    |     |     |          |          | LNPEVLL  | 1  | 1 | 1 |
|          |          |            |          |       |   |    |    |     |     |          |          | LEYLVK   | 1  | 1 | 1 |
| Rv0064,9 | 15607206 | hypothetic | 8078.089 | 45.45 | 1 | 36 | 36 | 199 | 979 | 107.3021 | 7.649902 | YTYTGA   | 3  | 1 | 1 |
|          |          |            |          |       |   |    |    |     |     |          |          | VGYAPTI  | 16 | 1 | 1 |
|          |          |            |          |       |   |    |    |     |     |          |          | ATVDAY   | 1  | 1 | 1 |
|          |          |            |          |       |   |    |    |     |     |          |          | ISTSPSS  | 10 | 1 | 1 |
|          |          |            |          |       |   |    |    |     |     |          |          | VYYGEV   | 17 | 1 | 1 |
|          |          |            |          |       |   |    |    |     |     |          |          | NFFSFAE  | 4  | 1 | 1 |
|          |          |            |          |       |   |    |    |     |     |          |          | IDGELQD  | 12 | 1 | 1 |
|          |          |            |          |       |   |    |    |     |     |          |          | IVWIVDA  | 21 | 1 | 1 |
|          |          |            |          |       |   |    |    |     |     |          |          | LASAmV   | 4  | 1 | 1 |
|          |          |            |          |       |   |    |    |     |     |          |          | SSLEGPV  | 9  | 1 | 1 |
|          |          |            |          |       |   |    |    |     |     |          |          | IHYGNLL  | 13 | 1 | 1 |
|          |          |            |          |       |   |    |    |     |     |          |          | EFLSAYIS | 3  | 1 | 1 |
|          |          |            |          |       |   |    |    |     |     |          |          | LASAMV   | 7  | 1 | 1 |
|          |          |            |          |       |   |    |    |     |     |          |          | GPDVPPA  | 4  | 1 | 1 |
|          |          |            |          |       |   |    |    |     |     |          |          | GGDAAS   | 6  | 1 | 1 |
|          |          |            |          |       |   |    |    |     |     |          |          | IGGDWV   | 8  | 1 | 1 |
|          |          |            |          |       |   |    |    |     |     |          |          | VAPWLT'  | 2  | 1 | 1 |
|          |          |            |          |       |   |    |    |     |     |          |          | DVPVDV'  | 3  | 1 | 1 |
|          |          |            |          |       |   |    |    |     |     |          |          | HTVYTH   | 1  | 1 | 1 |
|          |          |            |          |       |   |    |    |     |     |          |          | LLDPHIL  | 9  | 1 | 1 |
|          |          |            |          |       |   |    |    |     |     |          |          | YPEDLFE  | 10 | 1 | 1 |
|          |          |            |          |       |   |    |    |     |     |          |          | YRIDGEL  | 6  | 1 | 1 |
|          |          |            |          |       |   |    |    |     |     |          |          | SLTGNQT  | 1  | 1 | 1 |
|          |          |            |          |       |   |    |    |     |     |          |          | TTQPPAA  | 1  | 1 | 1 |
|          |          |            |          |       |   |    |    |     |     |          |          | SYPGIGT  | 3  | 1 | 1 |



|                                |          |       |   |    |    |    |     |          |          |         |          |   |   |   |
|--------------------------------|----------|-------|---|----|----|----|-----|----------|----------|---------|----------|---|---|---|
|                                |          |       |   |    |    |    |     |          |          |         | LTVLELP  | 2 | 1 | 1 |
|                                |          |       |   |    |    |    |     |          |          |         | TTQPAA   | 3 | 1 | 1 |
|                                |          |       |   |    |    |    |     |          |          |         | EAYRIGG  | 2 | 1 | 1 |
|                                |          |       |   |    |    |    |     |          |          |         | ATVDAY   | 2 | 1 | 1 |
|                                |          |       |   |    |    |    |     |          |          |         | sSLEGPV  | 1 | 1 | 1 |
|                                |          |       |   |    |    |    |     |          |          |         | iSTSPSSS | 2 | 1 | 1 |
|                                |          |       |   |    |    |    |     |          |          |         | TFTQQQC  | 1 | 1 | 1 |
|                                |          |       |   |    |    |    |     |          |          |         | NFFSFAE  | 2 | 1 | 1 |
|                                |          |       |   |    |    |    |     |          |          |         | QVIPVEQ  | 3 | 1 | 1 |
|                                |          |       |   |    |    |    |     |          |          |         | LTVLELP  | 1 | 1 | 1 |
|                                |          |       |   |    |    |    |     |          |          |         | VASERTL  | 2 | 1 | 1 |
|                                |          |       |   |    |    |    |     |          |          |         | YHVDEPI  | 1 | 1 | 1 |
|                                |          |       |   |    |    |    |     |          |          |         | NIEATRE  | 1 | 1 | 1 |
|                                |          |       |   |    |    |    |     |          |          |         | SYPGIGT  | 1 | 1 | 1 |
|                                |          |       |   |    |    |    |     |          |          |         | VLVSVRE  | 1 | 1 | 1 |
| Rv1459c, 15608597 POSSIBLE     | 870.2783 | 12.69 | 1 | 6  | 6  | 23 | 591 | 62.65324 | 11.04834 | VGPASGI | 3        | 1 | 1 |   |
|                                |          |       |   |    |    |    |     |          |          | DVYSYL  | 5        | 1 | 1 |   |
|                                |          |       |   |    |    |    |     |          |          | ETPAPYC | 8        | 1 | 1 |   |
|                                |          |       |   |    |    |    |     |          |          | DVYSYL  | 2        | 1 | 1 |   |
|                                |          |       |   |    |    |    |     |          |          | TLLLWml | 2        | 1 | 1 |   |
|                                |          |       |   |    |    |    |     |          |          | DGLDPYI | 3        | 1 | 1 |   |
| Rv0210,1 15607351 hypothetical | 3344.439 | 12.8  | 1 | 6  | 6  | 65 | 492 | 52.31436 | 9.480957 | VADQVSI | 7        | 1 | 1 |   |
|                                |          |       |   |    |    |    |     |          |          | VVAVETI | 14       | 1 | 1 |   |
|                                |          |       |   |    |    |    |     |          |          | VVAVETI | 16       | 1 | 1 |   |
|                                |          |       |   |    |    |    |     |          |          | SVVEQLV | 3        | 1 | 1 |   |
|                                |          |       |   |    |    |    |     |          |          | VADQVSI | 2        | 1 | 1 |   |
|                                |          |       |   |    |    |    |     |          |          | WTGEVT  | 23       | 1 | 1 |   |
| Rv0093c, 15607235 PROBABI      | 2007.11  | 29.08 | 1 | 10 | 10 | 48 | 282 | 29.61237 | 9.158691 | AWFTQV  | 8        | 1 | 1 |   |
|                                |          |       |   |    |    |    |     |          |          | RHcATID | 6        | 1 | 1 |   |
|                                |          |       |   |    |    |    |     |          |          | GVPAAm  | 5        | 1 | 1 |   |
|                                |          |       |   |    |    |    |     |          |          | aWFTQV  | 1        | 1 | 1 |   |
|                                |          |       |   |    |    |    |     |          |          | HcATIDG | 4        | 1 | 1 |   |
|                                |          |       |   |    |    |    |     |          |          | AWFTQV  | 4        | 1 | 1 |   |
|                                |          |       |   |    |    |    |     |          |          | GVPAAM  | 3        | 1 | 1 |   |
|                                |          |       |   |    |    |    |     |          |          | RHcATID | 3        | 1 | 1 |   |
|                                |          |       |   |    |    |    |     |          |          | VDEHLGI | 2        | 1 | 1 |   |

|                   |          |          |          |       |    |    |     |      |          |          |          |          |    |   |   |
|-------------------|----------|----------|----------|-------|----|----|-----|------|----------|----------|----------|----------|----|---|---|
|                   |          |          |          |       |    |    |     |      |          |          | LAESRPV  | 5        | 1  | 1 |   |
|                   |          |          |          |       |    |    |     |      |          |          | HcATIDG  | 2        | 1  | 1 |   |
|                   |          |          |          |       |    |    |     |      |          |          | GVPAAM   | 1        | 1  | 1 |   |
|                   |          |          |          |       |    |    |     |      |          |          | RLAESRP  | 3        | 1  | 1 |   |
|                   |          |          |          |       |    |    |     |      |          |          | LDGERAI  | 1        | 1  | 1 |   |
| Rv0713,1          | 15608452 | CONSERV  | 1785.744 | 29.93 | 1  | 8  | 8   | 55   | 147      | 16.58383 | 11.06299 | VGYEIAL  | 8  | 1 | 1 |
|                   |          |          |          |       |    |    |     |      |          |          |          | DIPAVGG  | 19 | 1 | 1 |
|                   |          |          |          |       |    |    |     |      |          |          |          | GGEAAFV  | 4  | 1 | 1 |
|                   |          |          |          |       |    |    |     |      |          |          |          | RVGYEIA  | 8  | 1 | 1 |
|                   |          |          |          |       |    |    |     |      |          |          |          | GVEISR   | 2  | 1 | 1 |
|                   |          |          |          |       |    |    |     |      |          |          |          | YRGGEA   | 4  | 1 | 1 |
|                   |          |          |          |       |    |    |     |      |          |          |          | RGVEISR  | 6  | 1 | 1 |
|                   |          |          |          |       |    |    |     |      |          |          |          | GGEAAFV  | 4  | 1 | 1 |
| Rv0226c, 15607367 | PROBABI  | 7436.671 | 22.92    | 1     | 11 | 11 | 199 | 576  | 59.10175 | 9.92041  | ADVLTTG  | 48       | 1  | 1 |   |
|                   |          |          |          |       |    |    |     |      |          |          |          | AVQELLI  | 13 | 1 | 1 |
|                   |          |          |          |       |    |    |     |      |          |          |          | AVQELLI  | 18 | 1 | 1 |
|                   |          |          |          |       |    |    |     |      |          |          |          | LAAAHRI  | 80 | 1 | 1 |
|                   |          |          |          |       |    |    |     |      |          |          |          | VAPVHYI  | 6  | 1 | 1 |
|                   |          |          |          |       |    |    |     |      |          |          |          | FWSWGS   | 16 | 1 | 1 |
|                   |          |          |          |       |    |    |     |      |          |          |          | DDELALV  | 4  | 1 | 1 |
|                   |          |          |          |       |    |    |     |      |          |          |          | TVAVLP   | 3  | 1 | 1 |
|                   |          |          |          |       |    |    |     |      |          |          |          | RFSWGS   | 6  | 1 | 1 |
|                   |          |          |          |       |    |    |     |      |          |          |          | FWSWGS   | 1  | 1 | 1 |
|                   |          |          |          |       |    |    |     |      |          |          |          | TLGRLA   | 2  | 1 | 1 |
|                   |          |          |          |       |    |    |     |      |          |          |          | TVAVLP   | 1  | 1 | 1 |
|                   |          |          |          |       |    |    |     |      |          |          |          | TVAVLP   | 1  | 1 | 1 |
| Rv1522c, 15608660 | PROBABI  | 342.6972 | 7.85     | 1     | 5  | 5  | 10  | 1146 | 122.3529 | 8.265137 | EQAPLPP  | 3        | 1  | 1 |   |
|                   |          |          |          |       |    |    |     |      |          |          |          | EQAPLPP  | 1  | 1 | 1 |
|                   |          |          |          |       |    |    |     |      |          |          |          | IETSALLI | 1  | 1 | 1 |
|                   |          |          |          |       |    |    |     |      |          |          |          | ADTQDK   | 2  | 1 | 1 |
|                   |          |          |          |       |    |    |     |      |          |          |          | KLIENLR  | 1  | 1 | 1 |
|                   |          |          |          |       |    |    |     |      |          |          |          | AWNLPIT  | 2  | 1 | 1 |
| Rv0987,1          | 15608127 | PROBABI  | 752.0943 | 10.53 | 1  | 7  | 7   | 22   | 855      | 93.54572 | 9.83252  | EVELmAV  | 1  | 1 | 1 |
|                   |          |          |          |       |    |    |     |      |          |          |          | EVELMAV  | 1  | 1 | 1 |
|                   |          |          |          |       |    |    |     |      |          |          |          | EVELmAV  | 1  | 1 | 1 |
|                   |          |          |          |       |    |    |     |      |          |          |          | EDIVIQST | 2  | 1 | 1 |

|                              |          |       |   |    |    |     |     |          |          |  |          |    |   |   |
|------------------------------|----------|-------|---|----|----|-----|-----|----------|----------|--|----------|----|---|---|
|                              |          |       |   |    |    |     |     |          |          |  | WIDGNKI  | 2  | 1 | 1 |
|                              |          |       |   |    |    |     |     |          |          |  | YSSVFAP  | 9  | 1 | 1 |
|                              |          |       |   |    |    |     |     |          |          |  | GVmLSEF  | 2  | 1 | 1 |
|                              |          |       |   |    |    |     |     |          |          |  | GVMLSEI  | 1  | 1 | 1 |
|                              |          |       |   |    |    |     |     |          |          |  | EVELMA'  | 1  | 1 | 1 |
|                              |          |       |   |    |    |     |     |          |          |  | SDVYVSI  | 2  | 1 | 1 |
| Rv0206c, 15607347 POSSIBL    | 517.4488 | 12.39 | 1 | 7  | 7  | 15  | 944 | 100.8407 | 9.45166  |  | STDAAGI  | 2  | 1 | 1 |
|                              |          |       |   |    |    |     |     |          |          |  | LLGDDcV  | 1  | 1 | 1 |
|                              |          |       |   |    |    |     |     |          |          |  | mQIGSST  | 2  | 1 | 1 |
|                              |          |       |   |    |    |     |     |          |          |  | AmPLAAI  | 1  | 1 | 1 |
|                              |          |       |   |    |    |     |     |          |          |  | SVQSPAS  | 3  | 1 | 1 |
|                              |          |       |   |    |    |     |     |          |          |  | SSPASSPI | 3  | 1 | 1 |
|                              |          |       |   |    |    |     |     |          |          |  | MQIGSST  | 1  | 1 | 1 |
|                              |          |       |   |    |    |     |     |          |          |  | IGLGEIHI | 2  | 1 | 1 |
| Rv0528,5 15607668 PROBABI    | 4440.046 | 38.56 | 1 | 16 | 16 | 113 | 529 | 57.0959  | 9.026855 |  | rKHQIAIQ | 1  | 1 | 1 |
|                              |          |       |   |    |    |     |     |          |          |  | FPALNAP  | 17 | 1 | 1 |
|                              |          |       |   |    |    |     |     |          |          |  | IDQGPAA  | 8  | 1 | 1 |
|                              |          |       |   |    |    |     |     |          |          |  | VNNFQAI  | 12 | 1 | 1 |
|                              |          |       |   |    |    |     |     |          |          |  | KHQIAIQ  | 5  | 1 | 1 |
|                              |          |       |   |    |    |     |     |          |          |  | HQIAIQG  | 4  | 1 | 1 |
|                              |          |       |   |    |    |     |     |          |          |  | AGNTVD   | 5  | 1 | 1 |
|                              |          |       |   |    |    |     |     |          |          |  | VYLQGH   | 12 | 1 | 1 |
|                              |          |       |   |    |    |     |     |          |          |  | IDPPAGS' | 8  | 1 | 1 |
|                              |          |       |   |    |    |     |     |          |          |  | TSTVQWI  | 16 | 1 | 1 |
|                              |          |       |   |    |    |     |     |          |          |  | GDTGLD   | 12 | 1 | 1 |
|                              |          |       |   |    |    |     |     |          |          |  | AGQQVR   | 1  | 1 | 1 |
|                              |          |       |   |    |    |     |     |          |          |  | LQVNHPI  | 2  | 1 | 1 |
|                              |          |       |   |    |    |     |     |          |          |  | RKHQIAI  | 1  | 1 | 1 |
|                              |          |       |   |    |    |     |     |          |          |  | tSTVQWR  | 2  | 1 | 1 |
|                              |          |       |   |    |    |     |     |          |          |  | VGGDRV   | 1  | 1 | 1 |
|                              |          |       |   |    |    |     |     |          |          |  | gDTGLDS  | 1  | 1 | 1 |
|                              |          |       |   |    |    |     |     |          |          |  | fPALNAP  | 1  | 1 | 1 |
|                              |          |       |   |    |    |     |     |          |          |  | IDPPAGS' | 2  | 1 | 1 |
|                              |          |       |   |    |    |     |     |          |          |  | FPALNAP  | 1  | 1 | 1 |
|                              |          |       |   |    |    |     |     |          |          |  | IQVNHPL  | 1  | 1 | 1 |
| Rv1069c, 15608209 hypothetic | 3050.983 | 36.97 | 1 | 14 | 14 | 78  | 587 | 64.30089 | 6.976074 |  | TYAGLN   | 6  | 1 | 1 |

|                   |         |          |      |   |    |    |    |      |          |          |          |    |   |   |
|-------------------|---------|----------|------|---|----|----|----|------|----------|----------|----------|----|---|---|
|                   |         |          |      |   |    |    |    |      |          |          | HAGEALI  | 4  | 1 | 1 |
|                   |         |          |      |   |    |    |    |      |          |          | TYAGLN   | 20 | 1 | 1 |
|                   |         |          |      |   |    |    |    |      |          |          | DAGSPQV  | 5  | 1 | 1 |
|                   |         |          |      |   |    |    |    |      |          |          | SGGPGSL  | 6  | 1 | 1 |
|                   |         |          |      |   |    |    |    |      |          |          | WIPVVTF  | 2  | 1 | 1 |
|                   |         |          |      |   |    |    |    |      |          |          | VVYLQH   | 5  | 1 | 1 |
|                   |         |          |      |   |    |    |    |      |          |          | LVVFGES  | 2  | 1 | 1 |
|                   |         |          |      |   |    |    |    |      |          |          | sGGPGSL  | 1  | 1 | 1 |
|                   |         |          |      |   |    |    |    |      |          |          | TDGALFS  | 2  | 1 | 1 |
|                   |         |          |      |   |    |    |    |      |          |          | LVVFGES  | 1  | 1 | 1 |
|                   |         |          |      |   |    |    |    |      |          |          | WIPVVTF  | 4  | 1 | 1 |
|                   |         |          |      |   |    |    |    |      |          |          | GYDVLPC  | 5  | 1 | 1 |
|                   |         |          |      |   |    |    |    |      |          |          | YVATVA   | 3  | 1 | 1 |
|                   |         |          |      |   |    |    |    |      |          |          | HAGEALI  | 1  | 1 | 1 |
|                   |         |          |      |   |    |    |    |      |          |          | ARDLQRI  | 1  | 1 | 1 |
|                   |         |          |      |   |    |    |    |      |          |          | DLQRPD   | 5  | 1 | 1 |
|                   |         |          |      |   |    |    |    |      |          |          | LLFREPD  | 2  | 1 | 1 |
|                   |         |          |      |   |    |    |    |      |          |          | tYAGLNS  | 2  | 1 | 1 |
|                   |         |          |      |   |    |    |    |      |          |          | IVVFGES  | 1  | 1 | 1 |
| Rv1522c, 15608660 | PROBABI | 5345.077 | 19.9 | 1 | 14 | 14 | 90 | 1146 | 122.3529 | 8.265137 | AQLAAIV  | 21 | 1 | 1 |
|                   |         |          |      |   |    |    |    |      |          |          | ALAVTLC  | 39 | 1 | 1 |
|                   |         |          |      |   |    |    |    |      |          |          | TPGALAI  | 1  | 1 | 1 |
|                   |         |          |      |   |    |    |    |      |          |          | LDEATTI  | 2  | 1 | 1 |
|                   |         |          |      |   |    |    |    |      |          |          | YFVQSAI  | 2  | 1 | 1 |
|                   |         |          |      |   |    |    |    |      |          |          | TPGALAI  | 1  | 1 | 1 |
|                   |         |          |      |   |    |    |    |      |          |          | GAQIFLS  | 4  | 1 | 1 |
|                   |         |          |      |   |    |    |    |      |          |          | VADSARI  | 6  | 1 | 1 |
|                   |         |          |      |   |    |    |    |      |          |          | KGAQIFL  | 1  | 1 | 1 |
|                   |         |          |      |   |    |    |    |      |          |          | EIAELPNI | 1  | 1 | 1 |
|                   |         |          |      |   |    |    |    |      |          |          | EIAELPNI | 1  | 1 | 1 |
|                   |         |          |      |   |    |    |    |      |          |          | YFVQSAI  | 1  | 1 | 1 |
|                   |         |          |      |   |    |    |    |      |          |          | QLENASC  | 4  | 1 | 1 |
|                   |         |          |      |   |    |    |    |      |          |          | LAQmQQ   | 1  | 1 | 1 |
|                   |         |          |      |   |    |    |    |      |          |          | TVSTLDC  | 2  | 1 | 1 |
|                   |         |          |      |   |    |    |    |      |          |          | VADSARI  | 1  | 1 | 1 |
|                   |         |          |      |   |    |    |    |      |          |          | DADKPSr  | 2  | 1 | 1 |

|                                |          |       |   |    |    |    |      |          |          |         |          |   |   |   |
|--------------------------------|----------|-------|---|----|----|----|------|----------|----------|---------|----------|---|---|---|
| Rv0284,1 15607425 POSSIBLE     | 1123.897 | 16.32 | 1 | 19 | 19 | 35 | 1330 | 145.08   | 6.480957 | DFPQVV/ | 1        | 1 | 1 |   |
|                                |          |       |   |    |    |    |      |          |          |         | ALQDLAI  | 3 | 1 | 1 |
|                                |          |       |   |    |    |    |      |          |          |         | IHILFASQ | 2 | 1 | 1 |
|                                |          |       |   |    |    |    |      |          |          |         | LIATIGEC | 2 | 1 | 1 |
|                                |          |       |   |    |    |    |      |          |          |         | STYVDGI  | 2 | 1 | 1 |
|                                |          |       |   |    |    |    |      |          |          |         | KLIATIGI | 2 | 1 | 1 |
|                                |          |       |   |    |    |    |      |          |          |         | APQLWLI  | 6 | 1 | 1 |
|                                |          |       |   |    |    |    |      |          |          |         | AVVVQS'  | 1 | 1 | 1 |
|                                |          |       |   |    |    |    |      |          |          |         | LFTAAAN  | 1 | 1 | 1 |
|                                |          |       |   |    |    |    |      |          |          |         | DPLVFDA  | 3 | 1 | 1 |
|                                |          |       |   |    |    |    |      |          |          |         | SSAGNM'  | 1 | 1 | 1 |
|                                |          |       |   |    |    |    |      |          |          |         | LIVYADI  | 1 | 1 | 1 |
|                                |          |       |   |    |    |    |      |          |          |         | RDPLVFL  | 2 | 1 | 1 |
|                                |          |       |   |    |    |    |      |          |          |         | FADTLRC  | 2 | 1 | 1 |
|                                |          |       |   |    |    |    |      |          |          |         | VASPSVS  | 1 | 1 | 1 |
|                                |          |       |   |    |    |    |      |          |          |         | IGLKVAS  | 1 | 1 | 1 |
|                                |          |       |   |    |    |    |      |          |          |         | GVGFLVI  | 2 | 1 | 1 |
| WPLGEID                        | 1        | 1     | 1 |    |    |    |      |          |          |         |          |   |   |   |
| WPLGEID                        | 1        | 1     | 1 |    |    |    |      |          |          |         |          |   |   |   |
| Rv0876c, 15608016 POSSIBLE     | 137.6809 | 5.84  | 1 | 4  | 4  | 6  | 548  | 57.90082 | 10.85791 | SRRPPPM | 1        | 1 | 1 |   |
|                                |          |       |   |    |    |    |      |          |          |         | YLPLGE   | 3 | 1 | 1 |
|                                |          |       |   |    |    |    |      |          |          |         | MYLLVH   | 1 | 1 | 1 |
|                                |          |       |   |    |    |    |      |          |          |         | RPPpmPS. | 1 | 1 | 1 |
| Rv0908,2 15608048 PROBABI      | 779.89   | 4.02  | 1 | 2  | 2  | 11 | 797  | 84.92037 | 6.873535 | DAGDTV1 | 4        | 1 | 1 |   |
|                                |          |       |   |    |    |    |      |          |          |         | DAGDTV1  | 6 | 1 | 1 |
|                                |          |       |   |    |    |    |      |          |          |         | LAIIGQAI | 1 | 1 | 1 |
| Rv0076c, 15607218 PROBABI      | 445.2042 | 50.39 | 1 | 8  | 8  | 13 | 129  | 14.63993 | 10.81396 | LQEmLLC | 3        | 1 | 1 |   |
|                                |          |       |   |    |    |    |      |          |          |         | FALIVTQ  | 1 | 1 | 1 |
|                                |          |       |   |    |    |    |      |          |          |         | LQEMLLC  | 1 | 1 | 1 |
|                                |          |       |   |    |    |    |      |          |          |         | VGVEAPI  | 2 | 1 | 1 |
|                                |          |       |   |    |    |    |      |          |          |         | RLQEmLI  | 1 | 1 | 1 |
|                                |          |       |   |    |    |    |      |          |          |         | KLSHQPP  | 1 | 1 | 1 |
|                                |          |       |   |    |    |    |      |          |          |         | RLSQHFPA | 2 | 1 | 1 |
|                                |          |       |   |    |    |    |      |          |          |         | GQILGRR  | 1 | 1 | 1 |
| LSHQPPV                        | 1        | 1     | 1 |    |    |    |      |          |          |         |          |   |   |   |
| Rv1795,1 15608932 hypothetical | 2888.506 | 14.51 | 1 | 11 | 11 | 72 | 503  | 53.40082 | 9.041504 | ELGEAPL | 5        | 1 | 1 |   |

|                                |          |       |   |    |    |    |     |          |          |          |          |    |   |   |
|--------------------------------|----------|-------|---|----|----|----|-----|----------|----------|----------|----------|----|---|---|
|                                |          |       |   |    |    |    |     |          |          |          | ATQSLTE  | 8  | 1 | 1 |
|                                |          |       |   |    |    |    |     |          |          |          | RSQVIEH  | 6  | 1 | 1 |
|                                |          |       |   |    |    |    |     |          |          |          | SQVIEHIS | 15 | 1 | 1 |
|                                |          |       |   |    |    |    |     |          |          |          | WALcLVI  | 13 | 1 | 1 |
|                                |          |       |   |    |    |    |     |          |          |          | LRELGEA  | 9  | 1 | 1 |
|                                |          |       |   |    |    |    |     |          |          |          | ATQSLTE  | 7  | 1 | 1 |
|                                |          |       |   |    |    |    |     |          |          |          | GRWALcI  | 2  | 1 | 1 |
|                                |          |       |   |    |    |    |     |          |          |          | wALcLVI  | 2  | 1 | 1 |
|                                |          |       |   |    |    |    |     |          |          |          | FIADTERI | 1  | 1 | 1 |
|                                |          |       |   |    |    |    |     |          |          |          | FIADTER  | 3  | 1 | 1 |
|                                |          |       |   |    |    |    |     |          |          |          | SQVIEHIS | 1  | 1 | 1 |
| Rv0412c, 15607553 POSSIBLE     | 1547.523 | 12.76 | 1 | 6  | 6  | 33 | 439 | 47.08688 | 9.715332 | HAVDKPI  | 5        | 1  | 1 |   |
|                                |          |       |   |    |    |    |     |          |          | TITNLAI  | 3        | 1  | 1 |   |
|                                |          |       |   |    |    |    |     |          |          | ADETL    | 7        | 1  | 1 |   |
|                                |          |       |   |    |    |    |     |          |          | INSDISVC | 15       | 1  | 1 |   |
|                                |          |       |   |    |    |    |     |          |          | RHAVDK   | 2        | 1  | 1 |   |
|                                |          |       |   |    |    |    |     |          |          | QANDRIN  | 1        | 1  | 1 |   |
| Rv1431,1 15608569 hypothetical | 2556.992 | 24.45 | 1 | 14 | 14 | 60 | 589 | 65.28037 | 8.104004 | IREGEIV  | 3        | 1  | 1 |   |
|                                |          |       |   |    |    |    |     |          |          | YYAGNW   | 13       | 1  | 1 |   |
|                                |          |       |   |    |    |    |     |          |          | TGLFEAC  | 9        | 1  | 1 |   |
|                                |          |       |   |    |    |    |     |          |          | EGEIVAG  | 13       | 1  | 1 |   |
|                                |          |       |   |    |    |    |     |          |          | TGLFEAC  | 2        | 1  | 1 |   |
|                                |          |       |   |    |    |    |     |          |          | GDAEATr  | 1        | 1  | 1 |   |
|                                |          |       |   |    |    |    |     |          |          | LYDGATr  | 1        | 1  | 1 |   |
|                                |          |       |   |    |    |    |     |          |          | cNFADGE  | 2        | 1  | 1 |   |
|                                |          |       |   |    |    |    |     |          |          | ALNGLLF  | 2        | 1  | 1 |   |
|                                |          |       |   |    |    |    |     |          |          | GDAEATr  | 1        | 1  | 1 |   |
|                                |          |       |   |    |    |    |     |          |          | VIILEGQF | 2        | 1  | 1 |   |
|                                |          |       |   |    |    |    |     |          |          | ALDDEAI  | 4        | 1  | 1 |   |
|                                |          |       |   |    |    |    |     |          |          | ALDDEAI  | 2        | 1  | 1 |   |
|                                |          |       |   |    |    |    |     |          |          | SSALVVN  | 1        | 1  | 1 |   |
|                                |          |       |   |    |    |    |     |          |          | RcNFADC  | 3        | 1  | 1 |   |
|                                |          |       |   |    |    |    |     |          |          | VIILEGQF | 1        | 1  | 1 |   |
| Rv0051,2 15607193 PROBABI      | 1579.578 | 16.61 | 1 | 7  | 7  | 42 | 560 | 61.20137 | 9.715332 | AYYQLcY  | 7        | 1  | 1 |   |
|                                |          |       |   |    |    |    |     |          |          | YmEYPVI  | 4        | 1  | 1 |   |
|                                |          |       |   |    |    |    |     |          |          | YmEYPVI  | 6        | 1  | 1 |   |

|          |          |            |          |       |   |    |    |    |     |          |          |          |    |   |   |
|----------|----------|------------|----------|-------|---|----|----|----|-----|----------|----------|----------|----|---|---|
|          |          |            |          |       |   |    |    |    |     |          |          | AAcLQST  | 1  | 1 | 1 |
|          |          |            |          |       |   |    |    |    |     |          |          | SSWIETD  | 1  | 1 | 1 |
|          |          |            |          |       |   |    |    |    |     |          |          | YDGQIAV  | 14 | 1 | 1 |
|          |          |            |          |       |   |    |    |    |     |          |          | VANWDN   | 8  | 1 | 1 |
|          |          |            |          |       |   |    |    |    |     |          |          | AYYQLcY  | 1  | 1 | 1 |
| Rv1811,3 | 15608948 | POSSIBLE   | 1447.819 | 31.2  | 1 | 8  | 8  | 45 | 234 | 24.79114 | 8.338379 | DNAVEDI  | 8  | 1 | 1 |
|          |          |            |          |       |   |    |    |    |     |          |          | TGPAGDI  | 4  | 1 | 1 |
|          |          |            |          |       |   |    |    |    |     |          |          | LVDRDN.  | 21 | 1 | 1 |
|          |          |            |          |       |   |    |    |    |     |          |          | TGPAGDI  | 4  | 1 | 1 |
|          |          |            |          |       |   |    |    |    |     |          |          | TSSNDITI | 1  | 1 | 1 |
|          |          |            |          |       |   |    |    |    |     |          |          | TGPAGDI  | 2  | 1 | 1 |
|          |          |            |          |       |   |    |    |    |     |          |          | AHIVQRT  | 1  | 1 | 1 |
|          |          |            |          |       |   |    |    |    |     |          |          | AETYVR.  | 1  | 1 | 1 |
|          |          |            |          |       |   |    |    |    |     |          |          | VlcRPKA  | 2  | 1 | 1 |
|          |          |            |          |       |   |    |    |    |     |          |          | TGPAGDI  | 1  | 1 | 1 |
| Rv0982,1 | 15608122 | PROBABI    | 1979.261 | 7.74  | 1 | 6  | 6  | 51 | 504 | 54.37377 | 9.671387 | AQLLIAS  | 19 | 1 | 1 |
|          |          |            |          |       |   |    |    |    |     |          |          | TTADQR   | 3  | 1 | 1 |
|          |          |            |          |       |   |    |    |    |     |          |          | AVIRGEL  | 3  | 1 | 1 |
|          |          |            |          |       |   |    |    |    |     |          |          | GELFMSF  | 15 | 1 | 1 |
|          |          |            |          |       |   |    |    |    |     |          |          | GELFmSR  | 6  | 1 | 1 |
|          |          |            |          |       |   |    |    |    |     |          |          | AVIRGEL  | 2  | 1 | 1 |
|          |          |            |          |       |   |    |    |    |     |          |          | RTTADQI  | 1  | 1 | 1 |
|          |          |            |          |       |   |    |    |    |     |          |          | gELFMSR  | 1  | 1 | 1 |
|          |          |            |          |       |   |    |    |    |     |          |          | GELFMSF  | 1  | 1 | 1 |
| Rv0019c, | 15607161 | hypothetic | 4426.373 | 41.29 | 1 | 10 | 10 | 85 | 155 | 17.14133 | 10.79932 | ITLSEQP  | 20 | 1 | 1 |
|          |          |            |          |       |   |    |    |    |     |          |          | YLVVTEC  | 24 | 1 | 1 |
|          |          |            |          |       |   |    |    |    |     |          |          | ADDSTL   | 23 | 1 | 1 |
|          |          |            |          |       |   |    |    |    |     |          |          | ITLSEQP  | 1  | 1 | 1 |
|          |          |            |          |       |   |    |    |    |     |          |          | YLVVTEC  | 1  | 1 | 1 |
|          |          |            |          |       |   |    |    |    |     |          |          | HAARYL   | 1  | 1 | 1 |
|          |          |            |          |       |   |    |    |    |     |          |          | ADDSTL   | 2  | 1 | 1 |
|          |          |            |          |       |   |    |    |    |     |          |          | VPIGTPV  | 9  | 1 | 1 |
|          |          |            |          |       |   |    |    |    |     |          |          | AKVTTA   | 2  | 1 | 1 |
|          |          |            |          |       |   |    |    |    |     |          |          | VTTAVR   | 2  | 1 | 1 |
| Rv0103c, | 15607245 | PROBABI    | 4737.638 | 12.1  | 1 | 4  | 4  | 82 | 752 | 77.46085 | 7.29834  | AYPAAS   | 9  | 1 | 1 |
|          |          |            |          |       |   |    |    |    |     |          |          | AYPAAS   | 5  | 1 | 1 |

|          |          |            |          |       |   |   |   |    |      |          |          |          |    |   |   |
|----------|----------|------------|----------|-------|---|---|---|----|------|----------|----------|----------|----|---|---|
|          |          |            |          |       |   |   |   |    |      |          | LVIEATA  | 35       | 1  | 1 |   |
|          |          |            |          |       |   |   |   |    |      |          | LVIEATA  | 29       | 1  | 1 |   |
|          |          |            |          |       |   |   |   |    |      |          | FVTRPGE  | 1        | 1  | 1 |   |
|          |          |            |          |       |   |   |   |    |      |          | NVAVLLI  | 3        | 1  | 1 |   |
| Rv1030,3 | 15608170 | potassium- | 643.3318 | 7.19  | 1 | 6 | 6 | 16 | 709  | 74.58691 | 6.404785 | SAVTGGI  | 4  | 1 | 1 |
|          |          |            |          |       |   |   |   |    |      |          | TAAGNIE  | 2        | 1  | 1 |   |
|          |          |            |          |       |   |   |   |    |      |          | MIALVEC  | 2        | 1  | 1 |   |
|          |          |            |          |       |   |   |   |    |      |          | mIALVEG  | 3        | 1  | 1 |   |
|          |          |            |          |       |   |   |   |    |      |          | QGQTFID  | 1        | 1  | 1 |   |
|          |          |            |          |       |   |   |   |    |      |          | ESGGDRS  | 2        | 1  | 1 |   |
|          |          |            |          |       |   |   |   |    |      |          | RTAAGNI  | 2        | 1  | 1 |   |
| Rv1739c, | 15608877 | PROBABI    | 609.5505 | 10.89 | 1 | 6 | 6 | 18 | 560  | 59.32907 | 9.539551 | RVAHPHI  | 2  | 1 | 1 |
|          |          |            |          |       |   |   |   |    |      |          |          | YDAPLcF  | 4  | 1 | 1 |
|          |          |            |          |       |   |   |   |    |      |          |          | VAHPHD:  | 2  | 1 | 1 |
|          |          |            |          |       |   |   |   |    |      |          |          | VAHPHD:  | 2  | 1 | 1 |
|          |          |            |          |       |   |   |   |    |      |          |          | VPGLVV:  | 4  | 1 | 1 |
|          |          |            |          |       |   |   |   |    |      |          |          | RGIVFam  | 1  | 1 | 1 |
|          |          |            |          |       |   |   |   |    |      |          |          | RVPGLV\  | 1  | 1 | 1 |
|          |          |            |          |       |   |   |   |    |      |          |          | RGIVFAM  | 1  | 1 | 1 |
|          |          |            |          |       |   |   |   |    |      |          |          | vPGLVVY  | 1  | 1 | 1 |
| Rv1746,9 | 15608884 | ANCHOR     | 102.2993 | 3.78  | 1 | 2 | 2 | 3  | 476  | 50.63667 | 5.98584  | VcMQQTc  | 1  | 1 | 1 |
|          |          |            |          |       |   |   |   |    |      |          |          | VcmQQTc  | 1  | 1 | 1 |
|          |          |            |          |       |   |   |   |    |      |          |          | REcREEIF | 1  | 1 | 1 |
| Rv0676c, | 15607816 | PROBABI    | 185.63   | 8.61  | 1 | 3 | 3 | 3  | 964  | 104.7172 | 6.036621 | LQADTTH  | 1  | 1 | 1 |
|          |          |            |          |       |   |   |   |    |      |          |          | LAGNQGI  | 1  | 1 | 1 |
|          |          |            |          |       |   |   |   |    |      |          |          | VFEEGDS  | 1  | 1 | 1 |
| Rv0450c, | 15607591 | PROBABI    | 458.1688 | 7.86  | 1 | 5 | 5 | 14 | 967  | 105.1666 | 7.122559 | AYVTGPS  | 3  | 1 | 1 |
|          |          |            |          |       |   |   |   |    |      |          |          | DAPSFEA  | 3  | 1 | 1 |
|          |          |            |          |       |   |   |   |    |      |          |          | YYDGLV.  | 4  | 1 | 1 |
|          |          |            |          |       |   |   |   |    |      |          |          | SIVESTP/ | 2  | 1 | 1 |
|          |          |            |          |       |   |   |   |    |      |          |          | EGDSDSF  | 1  | 1 | 1 |
|          |          |            |          |       |   |   |   |    |      |          |          | DAPSFEA  | 1  | 1 | 1 |
| Rv0235c, | 15607376 | PROBABI    | 29.88593 | 3.53  | 1 | 2 | 2 | 2  | 482  | 54.80171 | 9.92041  | AQLYQYI  | 1  | 1 | 1 |
|          |          |            |          |       |   |   |   |    |      |          |          | HNPFPQS  | 1  | 1 | 1 |
| Rv1522c, | 15608660 | PROBABI    | 799.4531 | 5.06  | 1 | 5 | 5 | 29 | 1146 | 122.3529 | 8.265137 | TVTVPAL  | 9  | 1 | 1 |
|          |          |            |          |       |   |   |   |    |      |          |          | TVTVPAL  | 10 | 1 | 1 |



|          |          |         |          |       |   |    |    |     |     |          |          |          |    |   |   |
|----------|----------|---------|----------|-------|---|----|----|-----|-----|----------|----------|----------|----|---|---|
|          |          |         |          |       |   |    |    |     |     |          |          | EPVDHLI  | 1  | 1 | 1 |
|          |          |         |          |       |   |    |    |     |     |          |          | ANWWPS   | 7  | 1 | 1 |
|          |          |         |          |       |   |    |    |     |     |          |          | DPSTPPTI | 1  | 1 | 1 |
|          |          |         |          |       |   |    |    |     |     |          |          | ANWWPS   | 1  | 1 | 1 |
| Rv1814,3 | 15608951 | MEMBRA  | 81.75874 | 11.67 | 1 | 2  | 2  | 3   | 300 | 34.8601  | 9.671387 | LIWATHC  | 2  | 1 | 1 |
|          |          |         |          |       |   |    |    |     |     |          |          | WFEFVFN  | 1  | 1 | 1 |
| Rv0996,7 | 15608136 | PROBABI | 33.04    | 6.15  | 1 | 1  | 1  | 1   | 358 | 39.4949  | 4.805176 | WGYLPPI  | 1  | 1 | 1 |
| Rv0394c, | 15607535 | POSSIBL | 1277.759 | 35.15 | 1 | 5  | 5  | 24  | 239 | 25.26322 | 5.922363 | IDKNPEL  | 4  | 1 | 1 |
|          |          |         |          |       |   |    |    |     |     |          |          | EIcESVGC | 13 | 1 | 1 |
|          |          |         |          |       |   |    |    |     |     |          |          | LLAQAA   | 1  | 1 | 1 |
|          |          |         |          |       |   |    |    |     |     |          |          | LLAQAA   | 4  | 1 | 1 |
|          |          |         |          |       |   |    |    |     |     |          |          | iDKNPEL  | 1  | 1 | 1 |
|          |          |         |          |       |   |    |    |     |     |          |          | SSPDQDE  | 1  | 1 | 1 |
| Rv0845,6 | 15607985 | POSSIBL | 15133.54 | 48    | 1 | 30 | 30 | 345 | 425 | 45.75468 | 9.202637 | AELLAQT  | 35 | 1 | 1 |
|          |          |         |          |       |   |    |    |     |     |          |          | AELLAQT  | 29 | 1 | 1 |
|          |          |         |          |       |   |    |    |     |     |          |          | ARVDAA   | 24 | 1 | 1 |
|          |          |         |          |       |   |    |    |     |     |          |          | aLAGLQS  | 1  | 1 | 1 |
|          |          |         |          |       |   |    |    |     |     |          |          | cVLDVAI  | 2  | 1 | 1 |
|          |          |         |          |       |   |    |    |     |     |          |          | LGITDEK  | 2  | 1 | 1 |
|          |          |         |          |       |   |    |    |     |     |          |          | cVLDVAI  | 2  | 1 | 1 |
|          |          |         |          |       |   |    |    |     |     |          |          | QELIELD  | 13 | 1 | 1 |
|          |          |         |          |       |   |    |    |     |     |          |          | SVAGLSA  | 18 | 1 | 1 |
|          |          |         |          |       |   |    |    |     |     |          |          | VDAAGG   | 20 | 1 | 1 |
|          |          |         |          |       |   |    |    |     |     |          |          | sGIDPIVF | 2  | 1 | 1 |
|          |          |         |          |       |   |    |    |     |     |          |          | IAEAIHDC | 34 | 1 | 1 |
|          |          |         |          |       |   |    |    |     |     |          |          | RIAEAIHI | 18 | 1 | 1 |
|          |          |         |          |       |   |    |    |     |     |          |          | SGIDPIVF | 18 | 1 | 1 |
|          |          |         |          |       |   |    |    |     |     |          |          | QATFELF  | 6  | 1 | 1 |
|          |          |         |          |       |   |    |    |     |     |          |          | SGIKISTE | 2  | 1 | 1 |
|          |          |         |          |       |   |    |    |     |     |          |          | RLGEGHI  | 16 | 1 | 1 |
|          |          |         |          |       |   |    |    |     |     |          |          | LGITDEK  | 2  | 1 | 1 |
|          |          |         |          |       |   |    |    |     |     |          |          | ALAGLQS  | 20 | 1 | 1 |
|          |          |         |          |       |   |    |    |     |     |          |          | QATFELF  | 1  | 1 | 1 |
|          |          |         |          |       |   |    |    |     |     |          |          | LRQATFE  | 3  | 1 | 1 |
|          |          |         |          |       |   |    |    |     |     |          |          | ISTDIDYF | 6  | 1 | 1 |

|                           |          |       |   |    |    |     |     |          |          |         |          |    |   |   |
|---------------------------|----------|-------|---|----|----|-----|-----|----------|----------|---------|----------|----|---|---|
|                           |          |       |   |    |    |     |     |          |          |         | SVAGLSA  | 12 | 1 | 1 |
|                           |          |       |   |    |    |     |     |          |          |         | SVAGLSA  | 7  | 1 | 1 |
|                           |          |       |   |    |    |     |     |          |          |         | ELLSNVV  | 16 | 1 | 1 |
|                           |          |       |   |    |    |     |     |          |          |         | QELIELD. | 1  | 1 | 1 |
|                           |          |       |   |    |    |     |     |          |          |         | LGEGHIG  | 18 | 1 | 1 |
|                           |          |       |   |    |    |     |     |          |          |         | aELLAQT  | 1  | 1 | 1 |
|                           |          |       |   |    |    |     |     |          |          |         | IAEAIHDc | 3  | 1 | 1 |
|                           |          |       |   |    |    |     |     |          |          |         | rIAEAIHD | 1  | 1 | 1 |
|                           |          |       |   |    |    |     |     |          |          |         | LGEGHIG  | 2  | 1 | 1 |
|                           |          |       |   |    |    |     |     |          |          |         | RLGEGHI  | 1  | 1 | 1 |
|                           |          |       |   |    |    |     |     |          |          |         | HSGATT/  | 1  | 1 | 1 |
|                           |          |       |   |    |    |     |     |          |          |         | RIAEAIHI | 3  | 1 | 1 |
|                           |          |       |   |    |    |     |     |          |          |         | SVAGLSA  | 1  | 1 | 1 |
|                           |          |       |   |    |    |     |     |          |          |         | IAEAIHDc | 1  | 1 | 1 |
|                           |          |       |   |    |    |     |     |          |          |         | IGITDEKc | 1  | 1 | 1 |
|                           |          |       |   |    |    |     |     |          |          |         | ELLSNVV  | 1  | 1 | 1 |
|                           |          |       |   |    |    |     |     |          |          |         | ALAGLQs  | 1  | 1 | 1 |
| Rv1319c,15608459 POSSIBLE | 8436.585 | 42.06 | 1 | 24 | 24 | 230 | 535 | 58.06118 | 9.759277 | LLASSDT | 40       | 1  | 1 |   |
|                           |          |       |   |    |    |     |     |          |          |         | GDLVVFI  | 22 | 1 | 1 |
|                           |          |       |   |    |    |     |     |          |          |         | FAGDAAI  | 5  | 1 | 1 |
|                           |          |       |   |    |    |     |     |          |          |         | gDLVVFL  | 1  | 1 | 1 |
|                           |          |       |   |    |    |     |     |          |          |         | HAAVVF'  | 8  | 1 | 1 |
|                           |          |       |   |    |    |     |     |          |          |         | LANEMPI  | 13 | 1 | 1 |
|                           |          |       |   |    |    |     |     |          |          |         | LANEmPE  | 2  | 1 | 1 |
|                           |          |       |   |    |    |     |     |          |          |         | FFAIVVN  | 16 | 1 | 1 |
|                           |          |       |   |    |    |     |     |          |          |         | LcELAKS  | 2  | 1 | 1 |
|                           |          |       |   |    |    |     |     |          |          |         | AHWSLG   | 39 | 1 | 1 |
|                           |          |       |   |    |    |     |     |          |          |         | VEQGDLI  | 14 | 1 | 1 |
|                           |          |       |   |    |    |     |     |          |          |         | LDRPEDA  | 17 | 1 | 1 |
|                           |          |       |   |    |    |     |     |          |          |         | GFNAMV   | 1  | 1 | 1 |
|                           |          |       |   |    |    |     |     |          |          |         | FFAIVVN  | 6  | 1 | 1 |
|                           |          |       |   |    |    |     |     |          |          |         | FAGDAAI  | 9  | 1 | 1 |
|                           |          |       |   |    |    |     |     |          |          |         | ERPQLGC  | 11 | 1 | 1 |
|                           |          |       |   |    |    |     |     |          |          |         | ILASSDTI | 3  | 1 | 1 |
|                           |          |       |   |    |    |     |     |          |          |         | EVAAAAI  | 1  | 1 | 1 |
|                           |          |       |   |    |    |     |     |          |          |         | FEYTVVC  | 6  | 1 | 1 |

|                           |          |       |   |    |    |     |     |          |          |  |          |    |   |   |
|---------------------------|----------|-------|---|----|----|-----|-----|----------|----------|--|----------|----|---|---|
|                           |          |       |   |    |    |     |     |          |          |  | VEQGDLI  | 1  | 1 | 1 |
|                           |          |       |   |    |    |     |     |          |          |  | QRFEYTV  | 2  | 1 | 1 |
|                           |          |       |   |    |    |     |     |          |          |  | RVEQGDI  | 1  | 1 | 1 |
|                           |          |       |   |    |    |     |     |          |          |  | VRDLFGI  | 6  | 1 | 1 |
|                           |          |       |   |    |    |     |     |          |          |  | HVGREV.  | 1  | 1 | 1 |
|                           |          |       |   |    |    |     |     |          |          |  | EVAAAAI  | 1  | 1 | 1 |
|                           |          |       |   |    |    |     |     |          |          |  | GHEQPTF  | 1  | 1 | 1 |
|                           |          |       |   |    |    |     |     |          |          |  | AHWSLG   | 1  | 1 | 1 |
| Rv0931c, 15608071 TRANSM  | 4076.949 | 19.88 | 1 | 5  | 5  | 97  | 664 | 69.50249 | 5.858887 |  | LSPSGVA  | 42 | 1 | 1 |
|                           |          |       |   |    |    |     |     |          |          |  | LSPSGVA  | 43 | 1 | 1 |
|                           |          |       |   |    |    |     |     |          |          |  | LLAGSTI  | 6  | 1 | 1 |
|                           |          |       |   |    |    |     |     |          |          |  | VVTLAAI  | 2  | 1 | 1 |
|                           |          |       |   |    |    |     |     |          |          |  | TQTVLPF  | 3  | 1 | 1 |
|                           |          |       |   |    |    |     |     |          |          |  | VVKLAAI  | 1  | 1 | 1 |
| Rv0292,2 15607433 PROBABI | 1678.92  | 58.31 | 1 | 16 | 16 | 56  | 331 | 35.91004 | 10.34521 |  | YTVAAGI  | 4  | 1 | 1 |
|                           |          |       |   |    |    |     |     |          |          |  | IPLQETAI | 11 | 1 | 1 |
|                           |          |       |   |    |    |     |     |          |          |  | TWVGLT   | 2  | 1 | 1 |
|                           |          |       |   |    |    |     |     |          |          |  | EIGWEAC  | 9  | 1 | 1 |
|                           |          |       |   |    |    |     |     |          |          |  | HTDSDYV  | 5  | 1 | 1 |
|                           |          |       |   |    |    |     |     |          |          |  | VSANAEI  | 8  | 1 | 1 |
|                           |          |       |   |    |    |     |     |          |          |  | LADHLRI  | 1  | 1 | 1 |
|                           |          |       |   |    |    |     |     |          |          |  | SARIPLQI | 2  | 1 | 1 |
|                           |          |       |   |    |    |     |     |          |          |  | TTVLVW   | 2  | 1 | 1 |
|                           |          |       |   |    |    |     |     |          |          |  | SRPAQET  | 2  | 1 | 1 |
|                           |          |       |   |    |    |     |     |          |          |  | RLADHLI  | 2  | 1 | 1 |
|                           |          |       |   |    |    |     |     |          |          |  | GMRHTD   | 2  | 1 | 1 |
|                           |          |       |   |    |    |     |     |          |          |  | GmRHTD:  | 1  | 1 | 1 |
|                           |          |       |   |    |    |     |     |          |          |  | TDWRPGI  | 2  | 1 | 1 |
|                           |          |       |   |    |    |     |     |          |          |  | IPLQETAI | 1  | 1 | 1 |
|                           |          |       |   |    |    |     |     |          |          |  | YLDRYGI  | 1  | 1 | 1 |
|                           |          |       |   |    |    |     |     |          |          |  | YLDRYGI  | 1  | 1 | 1 |
| Rv0103c, 15607245 PROBABI | 8781.041 | 24.2  | 2 | 16 | 16 | 206 | 752 | 77.46085 | 7.29834  |  | LREEGHI  | 27 | 1 | 1 |
|                           |          |       |   |    |    |     |     |          |          |  | GTDVALI  | 20 | 2 | 1 |
|                           |          |       |   |    |    |     |     |          |          |  | LREEGHI  | 25 | 1 | 1 |
|                           |          |       |   |    |    |     |     |          |          |  | TGTLTVC  | 4  | 1 | 1 |
|                           |          |       |   |    |    |     |     |          |          |  | AALTIAD  | 12 | 1 | 1 |

|          |          |         |          |       |   |    |    |     |     |          |          |         |    |   |   |
|----------|----------|---------|----------|-------|---|----|----|-----|-----|----------|----------|---------|----|---|---|
|          |          |         |          |       |   |    |    |     |     |          | SIDTVVF  | 1       | 1  | 1 |   |
|          |          |         |          |       |   |    |    |     |     |          | DSAAAA   | 4       | 1  | 1 |   |
|          |          |         |          |       |   |    |    |     |     |          | GETVVFV  | 23      | 1  | 1 |   |
|          |          |         |          |       |   |    |    |     |     |          | AAADAV   | 9       | 1  | 1 |   |
|          |          |         |          |       |   |    |    |     |     |          | TGTLTVC  | 3       | 1  | 1 |   |
|          |          |         |          |       |   |    |    |     |     |          | LDGESRC  | 18      | 1  | 1 |   |
|          |          |         |          |       |   |    |    |     |     |          | TTPcHDA  | 14      | 1  | 1 |   |
|          |          |         |          |       |   |    |    |     |     |          | AAADAV   | 9       | 1  | 1 |   |
|          |          |         |          |       |   |    |    |     |     |          | AALTIAD  | 7       | 1  | 1 |   |
|          |          |         |          |       |   |    |    |     |     |          | EEGHTV/  | 1       | 1  | 1 |   |
|          |          |         |          |       |   |    |    |     |     |          | TILLTGD/ | 13      | 1  | 1 |   |
|          |          |         |          |       |   |    |    |     |     |          | GAQLGIF  | 1       | 2  | 1 |   |
|          |          |         |          |       |   |    |    |     |     |          | EEGHTV/  | 2       | 1  | 1 |   |
|          |          |         |          |       |   |    |    |     |     |          | SIDTVVF  | 6       | 1  | 1 |   |
|          |          |         |          |       |   |    |    |     |     |          | tTPcHDA/ | 2       | 1  | 1 |   |
|          |          |         |          |       |   |    |    |     |     |          | IREEGHT  | 1       | 1  | 1 |   |
|          |          |         |          |       |   |    |    |     |     |          | AAADAV   | 1       | 1  | 1 |   |
|          |          |         |          |       |   |    |    |     |     |          | SIDTVVF  | 1       | 1  | 1 |   |
|          |          |         |          |       |   |    |    |     |     |          | AAADAV   | 1       | 1  | 1 |   |
|          |          |         |          |       |   |    |    |     |     |          | tILLTGDN | 1       | 1  | 1 |   |
| Rv1348,1 | 15608488 | PROBABI | 10256.69 | 25.03 | 1 | 24 | 24 | 273 | 859 | 92.90826 | 7.415527 | LPDGYD/ | 32 | 1 | 1 |
|          |          |         |          |       |   |    |    |     |     |          | VLRLPDC  | 21      | 1  | 1 |   |
|          |          |         |          |       |   |    |    |     |     |          | HLQVTLI  | 41      | 1  | 1 |   |
|          |          |         |          |       |   |    |    |     |     |          | SLAADEL  | 26      | 1  | 1 |   |
|          |          |         |          |       |   |    |    |     |     |          | ADQIVVI  | 30      | 1  | 1 |   |
|          |          |         |          |       |   |    |    |     |     |          | GTHEELL  | 28      | 1  | 1 |   |
|          |          |         |          |       |   |    |    |     |     |          | IVERGTH  | 5       | 1  | 1 |   |
|          |          |         |          |       |   |    |    |     |     |          | TGLLAAF  | 2       | 1  | 1 |   |
|          |          |         |          |       |   |    |    |     |     |          | LHTITRA  | 11      | 1  | 1 |   |
|          |          |         |          |       |   |    |    |     |     |          | HLQVTLI  | 3       | 1  | 1 |   |
|          |          |         |          |       |   |    |    |     |     |          | DRTVLVI  | 18      | 1  | 1 |   |
|          |          |         |          |       |   |    |    |     |     |          | VGfVLQI  | 11      | 1  | 1 |   |
|          |          |         |          |       |   |    |    |     |     |          | gTHEELL  | 2       | 1  | 1 |   |
|          |          |         |          |       |   |    |    |     |     |          | sLAADEL  | 1       | 1  | 1 |   |
|          |          |         |          |       |   |    |    |     |     |          | STLATLL  | 5       | 1  | 1 |   |
|          |          |         |          |       |   |    |    |     |     |          | VGGQDIF  | 3       | 1  | 1 |   |

|           |          |          |          |       |   |    |    |     |     |          |          |         |    |   |   |
|-----------|----------|----------|----------|-------|---|----|----|-----|-----|----------|----------|---------|----|---|---|
|           |          |          |          |       |   |    |    |     |     |          | tVLVIAHI | 1       | 1  | 1 |   |
|           |          |          |          |       |   |    |    |     |     |          | AILGDTP  | 3       | 1  | 1 |   |
|           |          |          |          |       |   |    |    |     |     |          | GTHEELL  | 2       | 1  | 1 |   |
|           |          |          |          |       |   |    |    |     |     |          | TVLVIAH  | 17      | 1  | 1 |   |
|           |          |          |          |       |   |    |    |     |     |          | FHDVERC  | 1       | 1  | 1 |   |
|           |          |          |          |       |   |    |    |     |     |          | LTRDRTV  | 2       | 1  | 1 |   |
|           |          |          |          |       |   |    |    |     |     |          | ADQIVVL  | 2       | 1  | 1 |   |
|           |          |          |          |       |   |    |    |     |     |          | GAIRVGC  | 1       | 1  | 1 |   |
|           |          |          |          |       |   |    |    |     |     |          | LPDGYDT  | 1       | 1  | 1 |   |
|           |          |          |          |       |   |    |    |     |     |          | vLRLPDG  | 1       | 1  | 1 |   |
|           |          |          |          |       |   |    |    |     |     |          | aDQIVVL  | 1       | 1  | 1 |   |
|           |          |          |          |       |   |    |    |     |     |          | QRLTIAR  | 1       | 1  | 1 |   |
|           |          |          |          |       |   |    |    |     |     |          | EAQIHDR  | 1       | 1  | 1 |   |
| Rv0969,1  | 15608109 | PROBABI  | 5195.527 | 22.73 | 1 | 17 | 17 | 149 | 770 | 80.05293 | 9.085449 | TAVFVGC | 2  | 1 | 1 |
|           |          |          |          |       |   |    |    |     |     |          | LAAAVES  | 44      | 1  | 1 |   |
|           |          |          |          |       |   |    |    |     |     |          | GLAIPAA  | 16      | 1  | 1 |   |
|           |          |          |          |       |   |    |    |     |     |          | TAVFVGC  | 9       | 1  | 1 |   |
|           |          |          |          |       |   |    |    |     |     |          | LVDEQHI  | 6       | 1  | 1 |   |
|           |          |          |          |       |   |    |    |     |     |          | LHAmGLU  | 7       | 1  | 1 |   |
|           |          |          |          |       |   |    |    |     |     |          | LHAMGL   | 19      | 1  | 1 |   |
|           |          |          |          |       |   |    |    |     |     |          | GAELGIL  | 3       | 1  | 1 |   |
|           |          |          |          |       |   |    |    |     |     |          | VTDVIAC  | 11      | 1  | 1 |   |
|           |          |          |          |       |   |    |    |     |     |          | TAAAIK   | 1       | 1  | 1 |   |
|           |          |          |          |       |   |    |    |     |     |          | LHAmGLU  | 6       | 1  | 1 |   |
|           |          |          |          |       |   |    |    |     |     |          | DDAADV   | 1       | 1  | 1 |   |
|           |          |          |          |       |   |    |    |     |     |          | KLVDQI   | 5       | 1  | 1 |   |
|           |          |          |          |       |   |    |    |     |     |          | RKLVDEQ  | 1       | 1  | 1 |   |
|           |          |          |          |       |   |    |    |     |     |          | IAAAVES  | 3       | 1  | 1 |   |
|           |          |          |          |       |   |    |    |     |     |          | mRVTDV   | 5       | 1  | 1 |   |
|           |          |          |          |       |   |    |    |     |     |          | MRVTDV   | 3       | 1  | 1 |   |
|           |          |          |          |       |   |    |    |     |     |          | VLAEVLI  | 1       | 1  | 1 |   |
|           |          |          |          |       |   |    |    |     |     |          | IDTVVFD  | 1       | 1  | 1 |   |
|           |          |          |          |       |   |    |    |     |     |          | RQPDQVI  | 3       | 1  | 1 |   |
|           |          |          |          |       |   |    |    |     |     |          | vTDVIAG  | 1       | 1  | 1 |   |
|           |          |          |          |       |   |    |    |     |     |          | RQPDQVI  | 1       | 1  | 1 |   |
| Rv1320c,1 | 15608460 | POSSIBLI | 6200.911 | 32.28 | 1 | 13 | 16 | 190 | 567 | 61.92565 | 7.840332 | LASEMPE | 32 | 1 | 1 |

|          |          |         |          |       |   |    |    |    |     |          |          |          |    |   |   |
|----------|----------|---------|----------|-------|---|----|----|----|-----|----------|----------|----------|----|---|---|
|          |          |         |          |       |   |    |    |    |     |          |          | VEQGDL   | 25 | 1 | 1 |
|          |          |         |          |       |   |    |    |    |     |          |          | FQGDASI  | 7  | 1 | 1 |
|          |          |         |          |       |   |    |    |    |     |          |          | WSLGETV  | 17 | 1 | 1 |
|          |          |         |          |       |   |    |    |    |     |          |          | LcELAKS  | 2  | 1 | 1 |
|          |          |         |          |       |   |    |    |    |     |          |          | FFTVIDD  | 20 | 1 | 1 |
|          |          |         |          |       |   |    |    |    |     |          |          | FEYTVIG  | 26 | 1 | 1 |
|          |          |         |          |       |   |    |    |    |     |          |          | LLASSQT  | 16 | 1 | 1 |
|          |          |         |          |       |   |    |    |    |     |          |          | LASEmPE  | 5  | 1 | 1 |
|          |          |         |          |       |   |    |    |    |     |          |          | wSLGETV  | 1  | 1 | 1 |
|          |          |         |          |       |   |    |    |    |     |          |          | LASEmPE  | 1  | 1 | 1 |
|          |          |         |          |       |   |    |    |    |     |          |          | LLASSQT  | 2  | 1 | 1 |
|          |          |         |          |       |   |    |    |    |     |          |          | EVAAAAI  | 1  | 2 | 2 |
|          |          |         |          |       |   |    |    |    |     |          |          | vEQGDLS  | 1  | 1 | 1 |
|          |          |         |          |       |   |    |    |    |     |          |          | LSHPEDA  | 16 | 1 | 1 |
|          |          |         |          |       |   |    |    |    |     |          |          | ISHPEDA  | 2  | 1 | 1 |
|          |          |         |          |       |   |    |    |    |     |          |          | HVGREV   | 2  | 2 | 2 |
|          |          |         |          |       |   |    |    |    |     |          |          | ERPCLGC  | 2  | 1 | 1 |
|          |          |         |          |       |   |    |    |    |     |          |          | VRDLFGF  | 5  | 2 | 2 |
|          |          |         |          |       |   |    |    |    |     |          |          | LASEMPE  | 6  | 1 | 1 |
|          |          |         |          |       |   |    |    |    |     |          |          | WSLGETV  | 1  | 1 | 1 |
| Rv1348,3 | 15608488 | PROBABI | 305.9357 | 9.9   | 1 | 5  | 5  | 11 | 859 | 92.90826 | 7.415527 | LPDGYD   | 2  | 1 | 1 |
|          |          |         |          |       |   |    |    |    |     |          |          | HLQVTLI  | 2  | 1 | 1 |
|          |          |         |          |       |   |    |    |    |     |          |          | GTHEELL  | 2  | 1 | 1 |
|          |          |         |          |       |   |    |    |    |     |          |          | VLRLPDC  | 1  | 1 | 1 |
|          |          |         |          |       |   |    |    |    |     |          |          | VGfVLQI  | 4  | 1 | 1 |
| Rv1349,7 | 15608489 | PROBABI | 2332.353 | 34.54 | 1 | 14 | 14 | 53 | 579 | 60.91662 | 6.265137 | VLIDGTD  | 10 | 1 | 1 |
|          |          |         |          |       |   |    |    |    |     |          |          | LPDGAN   | 7  | 1 | 1 |
|          |          |         |          |       |   |    |    |    |     |          |          | VVEDGSI  | 4  | 1 | 1 |
|          |          |         |          |       |   |    |    |    |     |          |          | DNVFAAI  | 5  | 1 | 1 |
|          |          |         |          |       |   |    |    |    |     |          |          | STILALIA | 2  | 1 | 1 |
|          |          |         |          |       |   |    |    |    |     |          |          | AQQAVcS  | 3  | 1 | 1 |
|          |          |         |          |       |   |    |    |    |     |          |          | YLEPFTA  | 4  | 1 | 1 |
|          |          |         |          |       |   |    |    |    |     |          |          | IGSVLTA  | 4  | 1 | 1 |
|          |          |         |          |       |   |    |    |    |     |          |          | VLfVDDC  | 5  | 1 | 1 |
|          |          |         |          |       |   |    |    |    |     |          |          | VDELIAR  | 1  | 1 | 1 |
|          |          |         |          |       |   |    |    |    |     |          |          | IGSVLTA  | 3  | 1 | 1 |

|                           |          |       |   |    |    |    |     |          |          |  |          |    |   |   |
|---------------------------|----------|-------|---|----|----|----|-----|----------|----------|--|----------|----|---|---|
|                           |          |       |   |    |    |    |     |          |          |  | FSQFWR   | 2  | 1 | 1 |
|                           |          |       |   |    |    |    |     |          |          |  | VLVDDC   | 1  | 1 | 1 |
|                           |          |       |   |    |    |    |     |          |          |  | AAPVLLV  | 1  | 1 | 1 |
|                           |          |       |   |    |    |    |     |          |          |  | HADRVLJ  | 1  | 1 | 1 |
| Rv0014c, 15607156 TRANSM  | 634.1614 | 21.25 | 1 | 11 | 11 | 23 | 626 | 66.46905 | 5.452637 |  | TSLSSA.  | 3  | 1 | 1 |
|                           |          |       |   |    |    |    |     |          |          |  | YELGEIL  | 2  | 1 | 1 |
|                           |          |       |   |    |    |    |     |          |          |  | HEGLSAI  | 2  | 1 | 1 |
|                           |          |       |   |    |    |    |     |          |          |  | YELGEIL  | 2  | 1 | 1 |
|                           |          |       |   |    |    |    |     |          |          |  | YQTAAEI  | 1  | 1 | 1 |
|                           |          |       |   |    |    |    |     |          |          |  | EDPIPPSA | 4  | 1 | 1 |
|                           |          |       |   |    |    |    |     |          |          |  | VMDFGI   | 1  | 1 | 1 |
|                           |          |       |   |    |    |    |     |          |          |  | DIVHTEG  | 2  | 1 | 1 |
|                           |          |       |   |    |    |    |     |          |          |  | DPSFYLR  | 2  | 1 | 1 |
|                           |          |       |   |    |    |    |     |          |          |  | DIVHTEG  | 1  | 1 | 1 |
|                           |          |       |   |    |    |    |     |          |          |  | DVAVKV   | 1  | 1 | 1 |
|                           |          |       |   |    |    |    |     |          |          |  | ADLARDI  | 1  | 1 | 1 |
|                           |          |       |   |    |    |    |     |          |          |  | AIADSGN  | 1  | 1 | 1 |
| Rv1743,4 15608881 PROBABI | 2872.374 | 28.45 | 1 | 14 | 14 | 87 | 566 | 60.47443 | 6.062012 |  | GGmGDV   | 8  | 1 | 1 |
|                           |          |       |   |    |    |    |     |          |          |  | YVTcGDI  | 8  | 1 | 1 |
|                           |          |       |   |    |    |    |     |          |          |  | QIGSALD  | 9  | 1 | 1 |
|                           |          |       |   |    |    |    |     |          |          |  | LQEPHV   | 10 | 1 | 1 |
|                           |          |       |   |    |    |    |     |          |          |  | GGMGDV   | 7  | 1 | 1 |
|                           |          |       |   |    |    |    |     |          |          |  | LQEPHV   | 13 | 1 | 1 |
|                           |          |       |   |    |    |    |     |          |          |  | FSESHAT  | 5  | 1 | 1 |
|                           |          |       |   |    |    |    |     |          |          |  | LTQLGN   | 2  | 1 | 1 |
|                           |          |       |   |    |    |    |     |          |          |  | LmSETLS  | 1  | 1 | 1 |
|                           |          |       |   |    |    |    |     |          |          |  | gGMGDV   | 1  | 1 | 1 |
|                           |          |       |   |    |    |    |     |          |          |  | QGPLAPP  | 2  | 1 | 1 |
|                           |          |       |   |    |    |    |     |          |          |  | LMSETLS  | 1  | 1 | 1 |
|                           |          |       |   |    |    |    |     |          |          |  | LTQLGN   | 2  | 1 | 1 |
|                           |          |       |   |    |    |    |     |          |          |  | LVGRGG   | 1  | 1 | 1 |
|                           |          |       |   |    |    |    |     |          |          |  | RQGPLAF  | 2  | 1 | 1 |
|                           |          |       |   |    |    |    |     |          |          |  | GMAKNP   | 1  | 1 | 1 |
|                           |          |       |   |    |    |    |     |          |          |  | YVTcGDI  | 1  | 1 | 1 |
|                           |          |       |   |    |    |    |     |          |          |  | GGMGDV   | 5  | 1 | 1 |
|                           |          |       |   |    |    |    |     |          |          |  | GGmGDV   | 4  | 1 | 1 |

|                                |          |       |   |    |    |     |     |          |          |  |          |    |   |   |
|--------------------------------|----------|-------|---|----|----|-----|-----|----------|----------|--|----------|----|---|---|
|                                |          |       |   |    |    |     |     |          |          |  | LPVPSTH  | 2  | 1 | 1 |
|                                |          |       |   |    |    |     |     |          |          |  | LVGRGGI  | 2  | 1 | 1 |
| Rv1639c, 15608777 hypothetical | 193.3166 | 20.45 | 1 | 4  | 4  | 6   | 489 | 51.75927 | 8.147949 |  | DAAANP   | 2  | 1 | 1 |
|                                |          |       |   |    |    |     |     |          |          |  | LFGGNEI  | 2  | 1 | 1 |
|                                |          |       |   |    |    |     |     |          |          |  | HGSYTGI  | 1  | 1 | 1 |
|                                |          |       |   |    |    |     |     |          |          |  | SENPPPP  | 1  | 1 | 1 |
| Rv0593,1 15607733 POSSIBLE     | 6751.881 | 58.96 | 1 | 20 | 20 | 208 | 402 | 43.14769 | 6.430176 |  | MTIYVQM  | 18 | 1 | 1 |
|                                |          |       |   |    |    |     |     |          |          |  | AIDSTNQ  | 21 | 1 | 1 |
|                                |          |       |   |    |    |     |     |          |          |  | LATFTAE  | 14 | 1 | 1 |
|                                |          |       |   |    |    |     |     |          |          |  | VADVWV   | 18 | 1 | 1 |
|                                |          |       |   |    |    |     |     |          |          |  | NWIATLI  | 9  | 1 | 1 |
|                                |          |       |   |    |    |     |     |          |          |  | YTPNPNI  | 14 | 1 | 1 |
|                                |          |       |   |    |    |     |     |          |          |  | MTIYVQr  | 14 | 1 | 1 |
|                                |          |       |   |    |    |     |     |          |          |  | LGLTAPF  | 6  | 1 | 1 |
|                                |          |       |   |    |    |     |     |          |          |  | VLTDVPE  | 19 | 1 | 1 |
|                                |          |       |   |    |    |     |     |          |          |  | DPDTmIP  | 5  | 1 | 1 |
|                                |          |       |   |    |    |     |     |          |          |  | YTPNPNI  | 14 | 1 | 1 |
|                                |          |       |   |    |    |     |     |          |          |  | mTIYVQn  | 5  | 1 | 1 |
|                                |          |       |   |    |    |     |     |          |          |  | ALEQAW   | 11 | 1 | 1 |
|                                |          |       |   |    |    |     |     |          |          |  | DPDTMIP  | 7  | 1 | 1 |
|                                |          |       |   |    |    |     |     |          |          |  | SPYVVC   | 1  | 1 | 1 |
|                                |          |       |   |    |    |     |     |          |          |  | VRVADV   | 2  | 1 | 1 |
|                                |          |       |   |    |    |     |     |          |          |  | ALEQAW   | 3  | 1 | 1 |
|                                |          |       |   |    |    |     |     |          |          |  | IGQTSLL  | 2  | 1 | 1 |
|                                |          |       |   |    |    |     |     |          |          |  | FSEVANR  | 2  | 1 | 1 |
|                                |          |       |   |    |    |     |     |          |          |  | ALAATRI  | 7  | 1 | 1 |
|                                |          |       |   |    |    |     |     |          |          |  | ALEQAW   | 8  | 1 | 1 |
|                                |          |       |   |    |    |     |     |          |          |  | LATFTAE  | 1  | 1 | 1 |
|                                |          |       |   |    |    |     |     |          |          |  | aIDSTNQI | 1  | 1 | 1 |
|                                |          |       |   |    |    |     |     |          |          |  | NSSAYPT  | 3  | 1 | 1 |
|                                |          |       |   |    |    |     |     |          |          |  | VADVWV   | 1  | 1 | 1 |
|                                |          |       |   |    |    |     |     |          |          |  | aLAATRP  | 1  | 1 | 1 |
|                                |          |       |   |    |    |     |     |          |          |  | fSEVANR  | 1  | 1 | 1 |
| Rv0450c, 15607591 PROBABLE     | 3141.864 | 22.75 | 1 | 20 | 20 | 137 | 967 | 105.1666 | 7.122559 |  | MVGDTE   | 2  | 1 | 1 |
|                                |          |       |   |    |    |     |     |          |          |  | QADEMA   | 2  | 1 | 1 |
|                                |          |       |   |    |    |     |     |          |          |  | mVGDTEI  | 4  | 1 | 1 |



|          |          |          |          |       |   |    |    |     |      |        |          |           |    |   |   |
|----------|----------|----------|----------|-------|---|----|----|-----|------|--------|----------|-----------|----|---|---|
|          |          |          |          |       |   |    |    |     |      |        |          | MHSLMA    | 15 | 1 | 1 |
|          |          |          |          |       |   |    |    |     |      |        |          | mHSLMA    | 2  | 1 | 1 |
|          |          |          |          |       |   |    |    |     |      |        |          | mHSLmAl   | 22 | 1 | 1 |
|          |          |          |          |       |   |    |    |     |      |        |          | LSEQIGV   | 2  | 1 | 1 |
|          |          |          |          |       |   |    |    |     |      |        |          | MHSLMA    | 7  | 1 | 1 |
|          |          |          |          |       |   |    |    |     |      |        |          | SIFDALD   | 2  | 1 | 1 |
|          |          |          |          |       |   |    |    |     |      |        |          | MKPEILM   | 2  | 1 | 1 |
|          |          |          |          |       |   |    |    |     |      |        |          | AMKSFLS   | 1  | 1 | 1 |
|          |          |          |          |       |   |    |    |     |      |        |          | mVGDTEI   | 2  | 1 | 1 |
|          |          |          |          |       |   |    |    |     |      |        |          | VQAITRP   | 2  | 1 | 1 |
|          |          |          |          |       |   |    |    |     |      |        |          | LmPQmV    | 7  | 1 | 1 |
|          |          |          |          |       |   |    |    |     |      |        |          | SFLSSDG   | 3  | 1 | 1 |
|          |          |          |          |       |   |    |    |     |      |        |          | mHSLmAl   | 7  | 1 | 1 |
|          |          |          |          |       |   |    |    |     |      |        |          | DHVADFI   | 6  | 1 | 1 |
|          |          |          |          |       |   |    |    |     |      |        |          | EmDRLM    | 2  | 1 | 1 |
|          |          |          |          |       |   |    |    |     |      |        |          | QADEmA'   | 1  | 1 | 1 |
|          |          |          |          |       |   |    |    |     |      |        |          | VQAITRP   | 4  | 1 | 1 |
|          |          |          |          |       |   |    |    |     |      |        |          | LMPQMV    | 6  | 1 | 1 |
|          |          |          |          |       |   |    |    |     |      |        |          | TSYNDRI   | 1  | 1 | 1 |
|          |          |          |          |       |   |    |    |     |      |        |          | DYLPDFI   | 5  | 1 | 1 |
|          |          |          |          |       |   |    |    |     |      |        |          | MVGDTE    | 1  | 1 | 1 |
|          |          |          |          |       |   |    |    |     |      |        |          | LMPQmV    | 10 | 1 | 1 |
|          |          |          |          |       |   |    |    |     |      |        |          | mKPEILM   | 1  | 1 | 1 |
|          |          |          |          |       |   |    |    |     |      |        |          | LMPQMV    | 4  | 1 | 1 |
|          |          |          |          |       |   |    |    |     |      |        |          | VQAITRP   | 2  | 1 | 1 |
|          |          |          |          |       |   |    |    |     |      |        |          | HcYGIPic' | 1  | 1 | 1 |
|          |          |          |          |       |   |    |    |     |      |        |          | EMDRLM    | 1  | 1 | 1 |
|          |          |          |          |       |   |    |    |     |      |        |          | LmPQmV    | 2  | 1 | 1 |
|          |          |          |          |       |   |    |    |     |      |        |          | EITEELRI  | 1  | 1 | 1 |
|          |          |          |          |       |   |    |    |     |      |        |          | EMDRLm    | 1  | 1 | 1 |
|          |          |          |          |       |   |    |    |     |      |        |          | mKPEILm   | 1  | 1 | 1 |
|          |          |          |          |       |   |    |    |     |      |        |          | NPADFLV   | 1  | 1 | 1 |
|          |          |          |          |       |   |    |    |     |      |        |          | LSEQIGV   | 1  | 1 | 1 |
|          |          |          |          |       |   |    |    |     |      |        |          | FIILHR    | 3  | 1 | 1 |
| Rv0284,2 | 15607425 | POSSIBLE | 5759.189 | 14.59 | 1 | 19 | 19 | 180 | 1330 | 145.08 | 6.480957 | RFNDLQ/   | 2  | 1 | 1 |
|          |          |          |          |       |   |    |    |     |      |        |          | IIPAMLGI  | 14 | 1 | 1 |

|          |          |         |          |       |   |    |    |    |     |          |          |         |   |   |   |
|----------|----------|---------|----------|-------|---|----|----|----|-----|----------|----------|---------|---|---|---|
|          |          |         |          |       |   |    |    |    |     |          | IIPAmLGI | 13      | 1 | 1 |   |
|          |          |         |          |       |   |    |    |    |     |          | GLTmAAI  | 11      | 1 | 1 |   |
|          |          |         |          |       |   |    |    |    |     |          | GPDQLVI  | 13      | 1 | 1 |   |
|          |          |         |          |       |   |    |    |    |     |          | FNDLQA1  | 2       | 1 | 1 |   |
|          |          |         |          |       |   |    |    |    |     |          | ATGSAHI  | 5       | 1 | 1 |   |
|          |          |         |          |       |   |    |    |    |     |          | LLPTNLA  | 15      | 1 | 1 |   |
|          |          |         |          |       |   |    |    |    |     |          | FNDLQA1  | 3       | 1 | 1 |   |
|          |          |         |          |       |   |    |    |    |     |          | RPPAGMS  | 8       | 1 | 1 |   |
|          |          |         |          |       |   |    |    |    |     |          | ATGSAHI  | 12      | 1 | 1 |   |
|          |          |         |          |       |   |    |    |    |     |          | LHLVDEF  | 18      | 1 | 1 |   |
|          |          |         |          |       |   |    |    |    |     |          | RPPAGmS  | 6       | 1 | 1 |   |
|          |          |         |          |       |   |    |    |    |     |          | VAFTVLI  | 3       | 1 | 1 |   |
|          |          |         |          |       |   |    |    |    |     |          | RPADAVI  | 11      | 1 | 1 |   |
|          |          |         |          |       |   |    |    |    |     |          | SGKTTL   | 2       | 1 | 1 |   |
|          |          |         |          |       |   |    |    |    |     |          | YPGMAA   | 11      | 1 | 1 |   |
|          |          |         |          |       |   |    |    |    |     |          | RFNDLQ/  | 2       | 1 | 1 |   |
|          |          |         |          |       |   |    |    |    |     |          | DNTDQFI  | 3       | 1 | 1 |   |
|          |          |         |          |       |   |    |    |    |     |          | GLTMAA   | 15      | 1 | 1 |   |
|          |          |         |          |       |   |    |    |    |     |          | DNTDQFI  | 2       | 1 | 1 |   |
|          |          |         |          |       |   |    |    |    |     |          | RLHLVDI  | 3       | 1 | 1 |   |
|          |          |         |          |       |   |    |    |    |     |          | VAFTVLI  | 2       | 1 | 1 |   |
|          |          |         |          |       |   |    |    |    |     |          | ATGSAHI  | 2       | 1 | 1 |   |
|          |          |         |          |       |   |    |    |    |     |          | LLPTNLA  | 1       | 1 | 1 |   |
|          |          |         |          |       |   |    |    |    |     |          | YPGmAAI  | 1       | 1 | 1 |   |
| Rv1307,7 | 15608447 | PROBABI | 1520.628 | 48.88 | 1 | 14 | 14 | 29 | 446 | 48.77604 | 5.57959  | ADSTVNI | 1 | 1 | 1 |
|          |          |         |          |       |   |    |    |    |     |          | IAEQLEA  | 8       | 1 | 1 |   |
|          |          |         |          |       |   |    |    |    |     |          | AGQVDE   | 3       | 1 | 1 |   |
|          |          |         |          |       |   |    |    |    |     |          | QQLADA   | 2       | 1 | 1 |   |
|          |          |         |          |       |   |    |    |    |     |          | NHVADQ   | 2       | 1 | 1 |   |
|          |          |         |          |       |   |    |    |    |     |          | GQAVEE/  | 4       | 1 | 1 |   |
|          |          |         |          |       |   |    |    |    |     |          | QALLELA  | 1       | 1 | 1 |   |
|          |          |         |          |       |   |    |    |    |     |          | VGAPTL   | 1       | 1 | 1 |   |
|          |          |         |          |       |   |    |    |    |     |          | LAILLGD  | 1       | 1 | 1 |   |
|          |          |         |          |       |   |    |    |    |     |          | WSANSDI  | 1       | 1 | 1 |   |
|          |          |         |          |       |   |    |    |    |     |          | YLTVPAE  | 1       | 1 | 1 |   |
|          |          |         |          |       |   |    |    |    |     |          | RGEIVAQ  | 2       | 1 | 1 |   |

|          |          |         |          |       |   |    |    |     |      |          |          |         |    |   |   |
|----------|----------|---------|----------|-------|---|----|----|-----|------|----------|----------|---------|----|---|---|
|          |          |         |          |       |   |    |    |     |      |          | ALTSLVE  | 1       | 1  | 1 |   |
|          |          |         |          |       |   |    |    |     |      |          | LLDREA\  | 1       | 1  | 1 |   |
| Rv1183,1 | 15608323 | PROBABI | 648.2798 | 6.59  | 1 | 5  | 5  | 12  | 1002 | 106.3477 | 8.645996 | ATYQAG\ | 7  | 1 | 1 |
|          |          |         |          |       |   |    |    |     |      |          | QVADGV   | 1       | 1  | 1 |   |
|          |          |         |          |       |   |    |    |     |      |          | LASGANI  | 1       | 1  | 1 |   |
|          |          |         |          |       |   |    |    |     |      |          | sPQTVSA  | 1       | 1  | 1 |   |
|          |          |         |          |       |   |    |    |     |      |          | SPQTVSA  | 1       | 1  | 1 |   |
|          |          |         |          |       |   |    |    |     |      |          | VSQIPGV  | 1       | 1  | 1 |   |
| Rv0284,2 | 15607425 | POSSIBL | 2508.583 | 20.53 | 1 | 21 | 21 | 65  | 1330 | 145.08   | 6.480957 | VPIGVTG | 1  | 1 | 1 |
|          |          |         |          |       |   |    |    |     |      |          | VPIGVTG  | 1       | 1  | 1 |   |
|          |          |         |          |       |   |    |    |     |      |          | VNDTAD\  | 10      | 1  | 1 |   |
|          |          |         |          |       |   |    |    |     |      |          | GASFTTL  | 12      | 1  | 1 |   |
|          |          |         |          |       |   |    |    |     |      |          | LDVPALV  | 4       | 1  | 1 |   |
|          |          |         |          |       |   |    |    |     |      |          | ASALWSI  | 5       | 1  | 1 |   |
|          |          |         |          |       |   |    |    |     |      |          | HLLIVVD  | 3       | 1  | 1 |   |
|          |          |         |          |       |   |    |    |     |      |          | DEELRVF  | 1       | 1  | 1 |   |
|          |          |         |          |       |   |    |    |     |      |          | VSPITVL\ | 1       | 1  | 1 |   |
|          |          |         |          |       |   |    |    |     |      |          | IIPAMLG\ | 2       | 1  | 1 |   |
|          |          |         |          |       |   |    |    |     |      |          | SIGDVPT\ | 3       | 1  | 1 |   |
|          |          |         |          |       |   |    |    |     |      |          | WDSNPTI  | 5       | 1  | 1 |   |
|          |          |         |          |       |   |    |    |     |      |          | AGVTVV\  | 2       | 1  | 1 |   |
|          |          |         |          |       |   |    |    |     |      |          | WQTGGW   | 3       | 1  | 1 |   |
|          |          |         |          |       |   |    |    |     |      |          | AWIAQA\  | 1       | 1  | 1 |   |
|          |          |         |          |       |   |    |    |     |      |          | HTVPLA\  | 4       | 1  | 1 |   |
|          |          |         |          |       |   |    |    |     |      |          | GASFTTL  | 1       | 1  | 1 |   |
|          |          |         |          |       |   |    |    |     |      |          | DPHPDF\  | 2       | 1  | 1 |   |
|          |          |         |          |       |   |    |    |     |      |          | TEEVDAI  | 1       | 1  | 1 |   |
|          |          |         |          |       |   |    |    |     |      |          | EQYSDPE  | 1       | 1  | 1 |   |
|          |          |         |          |       |   |    |    |     |      |          | SLLDTQR  | 1       | 1  | 1 |   |
|          |          |         |          |       |   |    |    |     |      |          | SIGDVPT\ | 1       | 1  | 1 |   |
| Rv0425c, | 15607566 | POSSIBL | 6558.966 | 16.18 | 1 | 22 | 22 | 200 | 1539 | 159.6747 | 8.147949 | GLGPGPV | 17 | 1 | 1 |
|          |          |         |          |       |   |    |    |     |      |          | GNEISGG  | 17      | 1  | 1 |   |
|          |          |         |          |       |   |    |    |     |      |          | AAELVSC  | 29      | 1  | 1 |   |
|          |          |         |          |       |   |    |    |     |      |          | ALAGGLI  | 2       | 1  | 1 |   |
|          |          |         |          |       |   |    |    |     |      |          | QRGNEIS  | 3       | 1  | 1 |   |
|          |          |         |          |       |   |    |    |     |      |          | GNEISGG  | 14      | 1  | 1 |   |

|                           |          |       |   |    |    |     |      |          |          |  |          |    |   |   |
|---------------------------|----------|-------|---|----|----|-----|------|----------|----------|--|----------|----|---|---|
|                           |          |       |   |    |    |     |      |          |          |  | RAAELVS  | 13 | 1 | 1 |
|                           |          |       |   |    |    |     |      |          |          |  | GAQITQA  | 4  | 1 | 1 |
|                           |          |       |   |    |    |     |      |          |          |  | VLAGADL  | 1  | 1 | 1 |
|                           |          |       |   |    |    |     |      |          |          |  | KVLAGA   | 2  | 1 | 1 |
|                           |          |       |   |    |    |     |      |          |          |  | AEELRPG  | 22 | 1 | 1 |
|                           |          |       |   |    |    |     |      |          |          |  | RGAQITQ  | 2  | 1 | 1 |
|                           |          |       |   |    |    |     |      |          |          |  | QVEPTPG  | 2  | 1 | 1 |
|                           |          |       |   |    |    |     |      |          |          |  | gNEISGG  | 1  | 1 | 1 |
|                           |          |       |   |    |    |     |      |          |          |  | LLAQQIP  | 24 | 1 | 1 |
|                           |          |       |   |    |    |     |      |          |          |  | THEVVP   | 5  | 1 | 1 |
|                           |          |       |   |    |    |     |      |          |          |  | cMLYAG   | 2  | 1 | 1 |
|                           |          |       |   |    |    |     |      |          |          |  | TVAVLSS  | 5  | 1 | 1 |
|                           |          |       |   |    |    |     |      |          |          |  | ALAGGLI  | 2  | 1 | 1 |
|                           |          |       |   |    |    |     |      |          |          |  | TGADLV   | 7  | 1 | 1 |
|                           |          |       |   |    |    |     |      |          |          |  | QRGNEIS  | 2  | 1 | 1 |
|                           |          |       |   |    |    |     |      |          |          |  | LLAQQIP  | 3  | 1 | 1 |
|                           |          |       |   |    |    |     |      |          |          |  | cmLYAG   | 2  | 1 | 1 |
|                           |          |       |   |    |    |     |      |          |          |  | VLHAIPA  | 15 | 1 | 1 |
|                           |          |       |   |    |    |     |      |          |          |  | APPSYP   | 1  | 1 | 1 |
|                           |          |       |   |    |    |     |      |          |          |  | vLHAIPA  | 1  | 1 | 1 |
|                           |          |       |   |    |    |     |      |          |          |  | RcMLYAG  | 1  | 1 | 1 |
|                           |          |       |   |    |    |     |      |          |          |  | gLGPGPV  | 1  | 1 | 1 |
| Rv0236c, 15607377 PROBABI | 11816.99 | 23.36 | 1 | 24 | 24 | 307 | 1400 | 146.1895 | 9.583496 |  | FTAAATI  | 31 | 1 | 1 |
|                           |          |       |   |    |    |     |      |          |          |  | RLQGQPF  | 13 | 1 | 1 |
|                           |          |       |   |    |    |     |      |          |          |  | VSAPANF  | 34 | 1 | 1 |
|                           |          |       |   |    |    |     |      |          |          |  | LFAAGRF  | 40 | 1 | 1 |
|                           |          |       |   |    |    |     |      |          |          |  | ILIETVNC | 4  | 1 | 1 |
|                           |          |       |   |    |    |     |      |          |          |  | QGISYVL  | 17 | 1 | 1 |
|                           |          |       |   |    |    |     |      |          |          |  | HTYNRVI  | 6  | 1 | 1 |
|                           |          |       |   |    |    |     |      |          |          |  | RLQGQPF  | 3  | 1 | 1 |
|                           |          |       |   |    |    |     |      |          |          |  | VDGGPEV  | 21 | 1 | 1 |
|                           |          |       |   |    |    |     |      |          |          |  | LQGQPPL  | 13 | 1 | 1 |
|                           |          |       |   |    |    |     |      |          |          |  | VPDYPVI  | 24 | 1 | 1 |
|                           |          |       |   |    |    |     |      |          |          |  | AAGLPVI  | 7  | 1 | 1 |
|                           |          |       |   |    |    |     |      |          |          |  | LQGQPPL  | 19 | 1 | 1 |
|                           |          |       |   |    |    |     |      |          |          |  | ALDSVQI  | 2  | 1 | 1 |

|         |           |         |          |       |   |    |    |     |      |          |          |         |    |   |   |
|---------|-----------|---------|----------|-------|---|----|----|-----|------|----------|----------|---------|----|---|---|
|         |           |         |          |       |   |    |    |     |      |          | YPAIEIYF | 20      | 1  | 1 |   |
|         |           |         |          |       |   |    |    |     |      |          | FDEAGKI  | 7       | 1  | 1 |   |
|         |           |         |          |       |   |    |    |     |      |          | LAIEFGAF | 7       | 1  | 1 |   |
|         |           |         |          |       |   |    |    |     |      |          | NLDLPEI  | 2       | 1  | 1 |   |
|         |           |         |          |       |   |    |    |     |      |          | ETDYGRV  | 4       | 1  | 1 |   |
|         |           |         |          |       |   |    |    |     |      |          | THHAATI  | 2       | 1  | 1 |   |
|         |           |         |          |       |   |    |    |     |      |          | DSIPLTF  | 8       | 1  | 1 |   |
|         |           |         |          |       |   |    |    |     |      |          | VLVVPGL  | 14      | 1  | 1 |   |
|         |           |         |          |       |   |    |    |     |      |          | VLVVPGL  | 3       | 1  | 1 |   |
|         |           |         |          |       |   |    |    |     |      |          | ILIEVNC  | 1       | 1  | 1 |   |
|         |           |         |          |       |   |    |    |     |      |          | SARPLLI  | 3       | 1  | 1 |   |
|         |           |         |          |       |   |    |    |     |      |          | SIAGSPGI | 2       | 1  | 1 |   |
| Rv0236c | :15607377 | PROBABI | 11621.78 | 23.79 | 1 | 26 | 26 | 334 | 1400 | 146.1895 | 9.583496 | FTAAATI | 29 | 1 | 1 |
|         |           |         |          |       |   |    |    |     |      |          | LFAAGRI  | 37      | 1  | 1 |   |
|         |           |         |          |       |   |    |    |     |      |          | RLQGQPI  | 13      | 1  | 1 |   |
|         |           |         |          |       |   |    |    |     |      |          | QGISYVL  | 19      | 1  | 1 |   |
|         |           |         |          |       |   |    |    |     |      |          | RLQGQPI  | 9       | 1  | 1 |   |
|         |           |         |          |       |   |    |    |     |      |          | ILIEVNC  | 6       | 1  | 1 |   |
|         |           |         |          |       |   |    |    |     |      |          | VPDYPVI  | 21      | 1  | 1 |   |
|         |           |         |          |       |   |    |    |     |      |          | HTYNRVI  | 9       | 1  | 1 |   |
|         |           |         |          |       |   |    |    |     |      |          | VDGGPEV  | 21      | 1  | 1 |   |
|         |           |         |          |       |   |    |    |     |      |          | VSAPANI  | 32      | 1  | 1 |   |
|         |           |         |          |       |   |    |    |     |      |          | LQGQPPL  | 19      | 1  | 1 |   |
|         |           |         |          |       |   |    |    |     |      |          | AAGLPVI  | 12      | 1  | 1 |   |
|         |           |         |          |       |   |    |    |     |      |          | LQGQPPL  | 19      | 1  | 1 |   |
|         |           |         |          |       |   |    |    |     |      |          | vSAPANP  | 2       | 1  | 1 |   |
|         |           |         |          |       |   |    |    |     |      |          | YPAIEIYF | 20      | 1  | 1 |   |
|         |           |         |          |       |   |    |    |     |      |          | FDEAGKI  | 9       | 1  | 1 |   |
|         |           |         |          |       |   |    |    |     |      |          | VLVVPGL  | 13      | 1  | 1 |   |
|         |           |         |          |       |   |    |    |     |      |          | DSIPLTF  | 11      | 1  | 1 |   |
|         |           |         |          |       |   |    |    |     |      |          | ALDSVQI  | 1       | 1  | 1 |   |
|         |           |         |          |       |   |    |    |     |      |          | SARPLLI  | 5       | 1  | 1 |   |
|         |           |         |          |       |   |    |    |     |      |          | SIAGSPGI | 3       | 1  | 1 |   |
|         |           |         |          |       |   |    |    |     |      |          | VDHHSSL  | 1       | 1  | 1 |   |
|         |           |         |          |       |   |    |    |     |      |          | NLDLPEI  | 2       | 1  | 1 |   |
|         |           |         |          |       |   |    |    |     |      |          | ETDYGRV  | 4       | 1  | 1 |   |

|                              |          |       |   |   |   |    |     |          |          |  |          |    |   |   |
|------------------------------|----------|-------|---|---|---|----|-----|----------|----------|--|----------|----|---|---|
|                              |          |       |   |   |   |    |     |          |          |  | THHAATI  | 2  | 1 | 1 |
|                              |          |       |   |   |   |    |     |          |          |  | LAIEGAF  | 9  | 1 | 1 |
|                              |          |       |   |   |   |    |     |          |          |  | VLVVPGL  | 3  | 1 | 1 |
|                              |          |       |   |   |   |    |     |          |          |  | IFAAGRPL | 1  | 1 | 1 |
|                              |          |       |   |   |   |    |     |          |          |  | VDHHSSL  | 1  | 1 | 1 |
|                              |          |       |   |   |   |    |     |          |          |  | SIAGSPGL | 1  | 1 | 1 |
| Rv2163c, 15609300 Probable p | 169.1863 | 4.57  | 1 | 5 | 5 | 9  | 679 | 72.49229 | 9.627441 |  | TRQVVDL  | 1  | 1 | 1 |
|                              |          |       |   |   |   |    |     |          |          |  | GASFVFR  | 2  | 1 | 1 |
|                              |          |       |   |   |   |    |     |          |          |  | RPPGAQL  | 2  | 1 | 1 |
|                              |          |       |   |   |   |    |     |          |          |  | QVVDVGL  | 3  | 1 | 1 |
|                              |          |       |   |   |   |    |     |          |          |  | GLRRPPGL | 1  | 1 | 1 |
| Rv2772c, 15609909 PROBABI    | 3829.91  | 36.94 | 1 | 8 | 8 | 76 | 157 | 17.31525 | 10.4917  |  | LIAEDGL  | 35 | 1 | 1 |
|                              |          |       |   |   |   |    |     |          |          |  | DAADALL  | 19 | 1 | 1 |
|                              |          |       |   |   |   |    |     |          |          |  | dAADALL  | 1  | 1 | 1 |
|                              |          |       |   |   |   |    |     |          |          |  | TELEDDA  | 1  | 1 | 1 |
|                              |          |       |   |   |   |    |     |          |          |  | IQRDAAL  | 4  | 1 | 1 |
|                              |          |       |   |   |   |    |     |          |          |  | TELEDDA  | 8  | 1 | 1 |
|                              |          |       |   |   |   |    |     |          |          |  | AGFAYQL  | 1  | 1 | 1 |
|                              |          |       |   |   |   |    |     |          |          |  | AYDYAG   | 4  | 1 | 1 |
|                              |          |       |   |   |   |    |     |          |          |  | IHAEDGLI | 1  | 1 | 1 |
|                              |          |       |   |   |   |    |     |          |          |  | LIAEDGL  | 2  | 1 | 1 |
| Rv2843,2 15609980 PROBABI    | 142.6856 | 13.81 | 1 | 3 | 3 | 4  | 181 | 17.75643 | 9.598145 |  | ALATEIA  | 1  | 1 | 1 |
|                              |          |       |   |   |   |    |     |          |          |  | LVATTSC  | 2  | 1 | 1 |
|                              |          |       |   |   |   |    |     |          |          |  | TSAGEAS  | 1  | 1 | 1 |
| Rv3252c, 15610388 PROBABI    | 145.7411 | 8.65  | 1 | 4 | 4 | 5  | 416 | 46.98435 | 9.129395 |  | FGETLWI  | 1  | 1 | 1 |
|                              |          |       |   |   |   |    |     |          |          |  | LGVSPWL  | 1  | 1 | 1 |
|                              |          |       |   |   |   |    |     |          |          |  | VSTPEDP  | 1  | 1 | 1 |
|                              |          |       |   |   |   |    |     |          |          |  | RLGVSPV  | 2  | 1 | 1 |
| Rv2536,3 15609673 PROBABI    | 651.6309 | 24.78 | 1 | 5 | 5 | 16 | 230 | 24.61083 | 5.033691 |  | ADDSPTC  | 4  | 1 | 1 |
|                              |          |       |   |   |   |    |     |          |          |  | AADTDVL  | 5  | 1 | 1 |
|                              |          |       |   |   |   |    |     |          |          |  | ADDSPTC  | 4  | 1 | 1 |
|                              |          |       |   |   |   |    |     |          |          |  | TTESDTP  | 1  | 1 | 1 |
|                              |          |       |   |   |   |    |     |          |          |  | EAPTEVII | 1  | 1 | 1 |
|                              |          |       |   |   |   |    |     |          |          |  | AADTDVL  | 1  | 1 | 1 |
| Rv3694c, 15610830 POSSIBLE   | 1790.816 | 21.82 | 1 | 7 | 7 | 55 | 330 | 35.44869 | 6.536621 |  | HSLSGAE  | 11 | 1 | 1 |
|                              |          |       |   |   |   |    |     |          |          |  | SASSDQL  | 2  | 1 | 1 |

|                   |            |            |          |       |   |    |    |     |     |          |          |         |    |   |   |
|-------------------|------------|------------|----------|-------|---|----|----|-----|-----|----------|----------|---------|----|---|---|
|                   |            |            |          |       |   |    |    |     |     |          |          | SASSDQL | 6  | 1 | 1 |
|                   |            |            |          |       |   |    |    |     |     |          |          | SAVTGAI | 10 | 1 | 1 |
|                   |            |            |          |       |   |    |    |     |     |          |          | FWTVSFF | 11 | 1 | 1 |
|                   |            |            |          |       |   |    |    |     |     |          |          | sAVTGAI | 1  | 1 | 1 |
|                   |            |            |          |       |   |    |    |     |     |          |          | VSTHLSn | 4  | 1 | 1 |
|                   |            |            |          |       |   |    |    |     |     |          |          | VSTHLSM | 8  | 1 | 1 |
|                   |            |            |          |       |   |    |    |     |     |          |          | TFIRFWT | 1  | 1 | 1 |
|                   |            |            |          |       |   |    |    |     |     |          |          | SASSDQL | 1  | 1 | 1 |
| Rv2209,1          | 15609346   | Probable c | 620.0448 | 16.21 | 1 | 6  | 6  | 23  | 512 | 53.54479 | 11.16553 | IGVTADT | 11 | 1 | 1 |
|                   |            |            |          |       |   |    |    |     |     |          |          | EGAPLDA | 2  | 1 | 1 |
|                   |            |            |          |       |   |    |    |     |     |          |          | STPPDHL | 2  | 1 | 1 |
|                   |            |            |          |       |   |    |    |     |     |          |          | RPAPPLN | 2  | 1 | 1 |
|                   |            |            |          |       |   |    |    |     |     |          |          | HVWDSR  | 5  | 1 | 1 |
|                   |            |            |          |       |   |    |    |     |     |          |          | RPAPGKF | 1  | 1 | 1 |
| Rv2025c,1         | 15609162   | POSSIBLE   | 4947.5   | 19.88 | 1 | 5  | 5  | 135 | 332 | 35.18466 | 6.712402 | LHADAEI | 60 | 1 | 1 |
|                   |            |            |          |       |   |    |    |     |     |          |          | LLDGVDI | 33 | 1 | 1 |
|                   |            |            |          |       |   |    |    |     |     |          |          | RLLDGVI | 13 | 1 | 1 |
|                   |            |            |          |       |   |    |    |     |     |          |          | LLDGVDI | 16 | 1 | 1 |
|                   |            |            |          |       |   |    |    |     |     |          |          | IAHDAEH | 4  | 1 | 1 |
|                   |            |            |          |       |   |    |    |     |     |          |          | RLLDGVI | 7  | 1 | 1 |
|                   |            |            |          |       |   |    |    |     |     |          |          | ILDGVDP | 1  | 1 | 1 |
|                   |            |            |          |       |   |    |    |     |     |          |          | LLDGVDI | 1  | 1 | 1 |
| Rv3005c, 15610142 | hypothetic |            | 124.19   | 22.22 | 1 | 2  | 2  | 2   | 279 | 28.84186 | 5.186035 | QVPAGS/ | 1  | 1 | 1 |
|                   |            |            |          |       |   |    |    |     |     |          |          | YAGDFG/ | 1  | 1 | 1 |
| Rv2874,1          | 15610011   | POSSIBLE   | 636.345  | 6.62  | 1 | 3  | 3  | 19  | 695 | 74.12224 | 9.656738 | cGYHSHL | 2  | 1 | 1 |
|                   |            |            |          |       |   |    |    |     |     |          |          | SLATPPT | 15 | 1 | 1 |
|                   |            |            |          |       |   |    |    |     |     |          |          | ScQLVAV | 2  | 1 | 1 |
| Rv3448,1          | 15610584   | PROBABI    | 2090.866 | 22.91 | 1 | 10 | 10 | 62  | 467 | 46.70099 | 8.309082 | YQLSALC | 27 | 1 | 1 |

|          |          |             |          |       |   |    |    |     |     |          |          |         |    |   |   |
|----------|----------|-------------|----------|-------|---|----|----|-----|-----|----------|----------|---------|----|---|---|
|          |          |             |          |       |   |    |    |     |     |          | cDDVAEA  | 9       | 1  | 1 |   |
|          |          |             |          |       |   |    |    |     |     |          | DGAVLV   | 3       | 1  | 1 |   |
|          |          |             |          |       |   |    |    |     |     |          | RVTVHA   | 6       | 1  | 1 |   |
|          |          |             |          |       |   |    |    |     |     |          | VTVHAG   | 4       | 1  | 1 |   |
|          |          |             |          |       |   |    |    |     |     |          | RVTVHA   | 3       | 1  | 1 |   |
|          |          |             |          |       |   |    |    |     |     |          | DGAVLV   | 2       | 1  | 1 |   |
|          |          |             |          |       |   |    |    |     |     |          | GASPATA  | 1       | 1  | 1 |   |
|          |          |             |          |       |   |    |    |     |     |          | VTVHAG   | 3       | 1  | 1 |   |
|          |          |             |          |       |   |    |    |     |     |          | dGAVLVI  | 2       | 1  | 1 |   |
|          |          |             |          |       |   |    |    |     |     |          | YQLSALC  | 2       | 1  | 1 |   |
| Rv0638,1 | 57116765 | translocase | 174.1102 | 23.6  | 1 | 2  | 2  | 3   | 161 | 16.94589 | 9.656738 | SVNPIAF | 1  | 1 | 1 |
|          |          |             |          |       |   |    |    |     |     |          |          | AAGADA  | 2  | 1 | 1 |
| Rv3843c, | 15610979 | PROBAB      | 1743.096 | 21.64 | 1 | 8  | 8  | 62  | 342 | 37.36097 | 11.16553 | WGLTDH  | 2  | 1 | 1 |
|          |          |             |          |       |   |    |    |     |     |          |          | GmLLAPI | 11 | 1 | 1 |
|          |          |             |          |       |   |    |    |     |     |          |          | GmLLAPI | 5  | 1 | 1 |
|          |          |             |          |       |   |    |    |     |     |          |          | GMLLAPI | 9  | 1 | 1 |
|          |          |             |          |       |   |    |    |     |     |          |          | gmLLAPL | 1  | 1 | 1 |
|          |          |             |          |       |   |    |    |     |     |          |          | WIAVRPC | 9  | 1 | 1 |
|          |          |             |          |       |   |    |    |     |     |          |          | gMLLAPL | 1  | 1 | 1 |
|          |          |             |          |       |   |    |    |     |     |          |          | cRGmLLA | 2  | 1 | 1 |
|          |          |             |          |       |   |    |    |     |     |          |          | TPARPQV | 12 | 1 | 1 |
|          |          |             |          |       |   |    |    |     |     |          |          | cRGmLLA | 1  | 1 | 1 |
|          |          |             |          |       |   |    |    |     |     |          |          | TPPRLPP | 4  | 1 | 1 |
|          |          |             |          |       |   |    |    |     |     |          |          | TPARPQV | 2  | 1 | 1 |
|          |          |             |          |       |   |    |    |     |     |          |          | cRGMLLA | 1  | 1 | 1 |
|          |          |             |          |       |   |    |    |     |     |          |          | GmLLAPI | 1  | 1 | 1 |
|          |          |             |          |       |   |    |    |     |     |          |          | GMLLAPI | 1  | 1 | 1 |
| Rv2287,1 | 15609424 | Probable c  | 9438.576 | 17.53 | 1 | 11 | 11 | 182 | 542 | 57.45551 | 7.649902 | AVLVmA  | 28 | 1 | 1 |
|          |          |             |          |       |   |    |    |     |     |          |          | AVLVMA  | 40 | 1 | 1 |
|          |          |             |          |       |   |    |    |     |     |          |          | mPEDVAI | 7  | 1 | 1 |
|          |          |             |          |       |   |    |    |     |     |          |          | MPEDVA  | 22 | 1 | 1 |
|          |          |             |          |       |   |    |    |     |     |          |          | NQNLIDE | 21 | 1 | 1 |
|          |          |             |          |       |   |    |    |     |     |          |          | AVLVMA  | 28 | 1 | 1 |
|          |          |             |          |       |   |    |    |     |     |          |          | mPEDVAI | 2  | 1 | 1 |
|          |          |             |          |       |   |    |    |     |     |          |          | VRLGVLC | 1  | 1 | 1 |
|          |          |             |          |       |   |    |    |     |     |          |          | SAQAALI | 6  | 1 | 1 |



|           |                       |          |       |   |    |    |     |     |          |          |  |          |    |   |   |
|-----------|-----------------------|----------|-------|---|----|----|-----|-----|----------|----------|--|----------|----|---|---|
|           |                       |          |       |   |    |    |     |     |          |          |  | WARmPE   | 1  | 1 | 1 |
|           |                       |          |       |   |    |    |     |     |          |          |  | LGVLQH   | 2  | 1 | 1 |
|           |                       |          |       |   |    |    |     |     |          |          |  | AVLVmA   | 20 | 1 | 1 |
|           |                       |          |       |   |    |    |     |     |          |          |  | AVLVMA   | 1  | 1 | 1 |
|           |                       |          |       |   |    |    |     |     |          |          |  | QAVTTLI  | 1  | 1 | 1 |
|           |                       |          |       |   |    |    |     |     |          |          |  | QAVTTLI  | 1  | 1 | 1 |
|           |                       |          |       |   |    |    |     |     |          |          |  | IGVLQH   | 1  | 1 | 1 |
| Rv3870,2  | 15611006 POSSIBLE     | 3322.005 | 10.84 | 1 | 7  | 7  | 97  | 747 | 80.86182 | 8.001465 |  | VTSSATS  | 23 | 1 | 1 |
|           |                       |          |       |   |    |    |     |     |          |          |  | IGIGDQP  | 31 | 1 | 1 |
|           |                       |          |       |   |    |    |     |     |          |          |  | TRVTSSA  | 5  | 1 | 1 |
|           |                       |          |       |   |    |    |     |     |          |          |  | QWSRPAI  | 31 | 1 | 1 |
|           |                       |          |       |   |    |    |     |     |          |          |  | VPEINAD  | 2  | 1 | 1 |
|           |                       |          |       |   |    |    |     |     |          |          |  | THGLIHD  | 3  | 1 | 1 |
|           |                       |          |       |   |    |    |     |     |          |          |  | QWSRPAI  | 2  | 1 | 1 |
| Rv3887c,  | 15611023 PROBABI      | 483.5605 | 12.97 | 1 | 5  | 5  | 11  | 509 | 53.24371 | 8.543457 |  | VAGESFE  | 3  | 1 | 1 |
|           |                       |          |       |   |    |    |     |     |          |          |  | VAGESFE  | 2  | 1 | 1 |
|           |                       |          |       |   |    |    |     |     |          |          |  | KGFDGV   | 2  | 1 | 1 |
|           |                       |          |       |   |    |    |     |     |          |          |  | SLDELGV  | 2  | 1 | 1 |
|           |                       |          |       |   |    |    |     |     |          |          |  | cAVNIcYI | 1  | 1 | 1 |
|           |                       |          |       |   |    |    |     |     |          |          |  | GFDGVAI  | 1  | 1 | 1 |
| Rv3166c,; | 15610302 hypothetical | 13247.62 | 32.92 | 1 | 14 | 14 | 377 | 319 | 33.37494 | 7.210449 |  | ALHGAS   | 33 | 1 | 1 |
|           |                       |          |       |   |    |    |     |     |          |          |  | AAEIGLA  | 21 | 1 | 1 |
|           |                       |          |       |   |    |    |     |     |          |          |  | AAEIGLA  | 23 | 1 | 1 |
|           |                       |          |       |   |    |    |     |     |          |          |  | EAIIAcYV | 21 | 1 | 1 |
|           |                       |          |       |   |    |    |     |     |          |          |  | AAEIGLA  | 49 | 1 | 1 |
|           |                       |          |       |   |    |    |     |     |          |          |  | EAIIAcYV | 29 | 1 | 1 |
|           |                       |          |       |   |    |    |     |     |          |          |  | AAEIGLA  | 42 | 1 | 1 |
|           |                       |          |       |   |    |    |     |     |          |          |  | ELSHVPC  | 40 | 1 | 1 |
|           |                       |          |       |   |    |    |     |     |          |          |  | AAEIGLA  | 6  | 1 | 1 |
|           |                       |          |       |   |    |    |     |     |          |          |  | ISGDRIES | 55 | 1 | 1 |
|           |                       |          |       |   |    |    |     |     |          |          |  | AAEIGLA  | 7  | 1 | 1 |
|           |                       |          |       |   |    |    |     |     |          |          |  | FSPHVM   | 20 | 1 | 1 |
|           |                       |          |       |   |    |    |     |     |          |          |  | IESPAPSA | 2  | 1 | 1 |
|           |                       |          |       |   |    |    |     |     |          |          |  | FSPHVM   | 4  | 1 | 1 |
|           |                       |          |       |   |    |    |     |     |          |          |  | FSPHVm   | 6  | 1 | 1 |
|           |                       |          |       |   |    |    |     |     |          |          |  | eLSHVPG  | 1  | 1 | 1 |

|          |          |         |          |       |   |    |    |     |     |          |          |          |    |   |   |
|----------|----------|---------|----------|-------|---|----|----|-----|-----|----------|----------|----------|----|---|---|
|          |          |         |          |       |   |    |    |     |     |          |          | EAIIAcYV | 2  | 1 | 1 |
|          |          |         |          |       |   |    |    |     |     |          |          | FSPHVmN  | 5  | 1 | 1 |
|          |          |         |          |       |   |    |    |     |     |          |          | SESLARA  | 2  | 1 | 1 |
|          |          |         |          |       |   |    |    |     |     |          |          | eAIIAcYV | 1  | 1 | 1 |
|          |          |         |          |       |   |    |    |     |     |          |          | ISGDRIES | 2  | 1 | 1 |
|          |          |         |          |       |   |    |    |     |     |          |          | iSGDRIES | 3  | 1 | 1 |
|          |          |         |          |       |   |    |    |     |     |          |          | FSPHVmN  | 1  | 1 | 1 |
|          |          |         |          |       |   |    |    |     |     |          |          | IESPAPSA | 1  | 1 | 1 |
|          |          |         |          |       |   |    |    |     |     |          |          | EAIIAcYV | 1  | 1 | 1 |
| Rv1997,3 | 15609134 | PROBABI | 1363.724 | 8.62  | 1 | 5  | 5  | 27  | 905 | 94.9729  | 5.60498  | NIAYSGT  | 23 | 1 | 1 |
|          |          |         |          |       |   |    |    |     |     |          |          | QTGLSVN  | 1  | 1 | 1 |
|          |          |         |          |       |   |    |    |     |     |          |          | QTGLSVN  | 1  | 1 | 1 |
|          |          |         |          |       |   |    |    |     |     |          |          | SMVHTH   | 1  | 1 | 1 |
|          |          |         |          |       |   |    |    |     |     |          |          | QTGLSVN  | 1  | 1 | 1 |
| Rv2942,1 | 15610079 | CONSERV | 4010.032 | 11.52 | 1 | 9  | 9  | 107 | 920 | 95.0624  | 8.851074 | GEAGTTC  | 21 | 1 | 1 |
|          |          |         |          |       |   |    |    |     |     |          |          | HVGSVLI  | 25 | 1 | 1 |
|          |          |         |          |       |   |    |    |     |     |          |          | SATAMV   | 11 | 1 | 1 |
|          |          |         |          |       |   |    |    |     |     |          |          | ADTRHVQ  | 2  | 1 | 1 |
|          |          |         |          |       |   |    |    |     |     |          |          | SATAmV   | 8  | 1 | 1 |
|          |          |         |          |       |   |    |    |     |     |          |          | SATAmV   | 2  | 1 | 1 |
|          |          |         |          |       |   |    |    |     |     |          |          | IAQAFPG  | 21 | 1 | 1 |
|          |          |         |          |       |   |    |    |     |     |          |          | QLPPSEG  | 8  | 1 | 1 |
|          |          |         |          |       |   |    |    |     |     |          |          | sATAmVV  | 1  | 1 | 1 |
|          |          |         |          |       |   |    |    |     |     |          |          | SATAMV   | 2  | 1 | 1 |
|          |          |         |          |       |   |    |    |     |     |          |          | hVGSVLI  | 1  | 1 | 1 |
|          |          |         |          |       |   |    |    |     |     |          |          | GEAGTTC  | 3  | 1 | 1 |
|          |          |         |          |       |   |    |    |     |     |          |          | SVLRQLP  | 2  | 1 | 1 |
| Rv3743c, | 15610879 | PROBABI | 2225.613 | 15.45 | 1 | 10 | 10 | 66  | 660 | 68.60201 | 8.851074 | VGAGGG   | 21 | 1 | 1 |
|          |          |         |          |       |   |    |    |     |     |          |          | IATLVEQ  | 5  | 1 | 1 |
|          |          |         |          |       |   |    |    |     |     |          |          | GLmGLAI  | 10 | 1 | 1 |
|          |          |         |          |       |   |    |    |     |     |          |          | GLMGLA   | 4  | 1 | 1 |
|          |          |         |          |       |   |    |    |     |     |          |          | TQLFIEK  | 1  | 1 | 1 |
|          |          |         |          |       |   |    |    |     |     |          |          | IGDIVLVI | 20 | 1 | 1 |
|          |          |         |          |       |   |    |    |     |     |          |          | GLmGLAI  | 1  | 1 | 1 |
|          |          |         |          |       |   |    |    |     |     |          |          | ISADATV  | 1  | 1 | 1 |
|          |          |         |          |       |   |    |    |     |     |          |          | LARDSV   | 1  | 1 | 1 |

|                            |          |       |   |    |    |     |      |          |          |  |          |    |   |   |
|----------------------------|----------|-------|---|----|----|-----|------|----------|----------|--|----------|----|---|---|
|                            |          |       |   |    |    |     |      |          |          |  | TQLFIEK' | 1  | 1 | 1 |
|                            |          |       |   |    |    |     |      |          |          |  | IATLVEQ  | 1  | 1 | 1 |
| Rv1992c, 15609129 PROBABI  | 3659.382 | 8.43  | 1 | 7  | 7  | 94  | 771  | 79.26038 | 5.808105 |  | ALLSLVP  | 26 | 1 | 1 |
|                            |          |       |   |    |    |     |      |          |          |  | IVHIVEAI | 49 | 1 | 1 |
|                            |          |       |   |    |    |     |      |          |          |  | LATDGIII | 9  | 1 | 1 |
|                            |          |       |   |    |    |     |      |          |          |  | IVHIVEAI | 3  | 1 | 1 |
|                            |          |       |   |    |    |     |      |          |          |  | GLRALLS  | 2  | 1 | 1 |
|                            |          |       |   |    |    |     |      |          |          |  | iVHIVEAI | 1  | 1 | 1 |
|                            |          |       |   |    |    |     |      |          |          |  | EGTETIV. | 1  | 1 | 1 |
|                            |          |       |   |    |    |     |      |          |          |  | aLLSLVPI | 2  | 1 | 1 |
|                            |          |       |   |    |    |     |      |          |          |  | LATDGIII | 1  | 1 | 1 |
| Rv3764c, 15610900 POSSIBLF | 7958.398 | 23.37 | 1 | 13 | 13 | 165 | 475  | 50.31343 | 7.459473 |  | HLVAQLI  | 48 | 1 | 1 |
|                            |          |       |   |    |    |     |      |          |          |  | TPLTLDL  | 21 | 1 | 1 |
|                            |          |       |   |    |    |     |      |          |          |  | FLDAPGC  | 34 | 1 | 1 |
|                            |          |       |   |    |    |     |      |          |          |  | RHLVAQI  | 3  | 1 | 1 |
|                            |          |       |   |    |    |     |      |          |          |  | FLDAPGC  | 34 | 1 | 1 |
|                            |          |       |   |    |    |     |      |          |          |  | tPLTLDLI | 1  | 1 | 1 |
|                            |          |       |   |    |    |     |      |          |          |  | IAGSRTPi | 5  | 1 | 1 |
|                            |          |       |   |    |    |     |      |          |          |  | FLDAPGC  | 1  | 1 | 1 |
|                            |          |       |   |    |    |     |      |          |          |  | HETHNYI  | 1  | 1 | 1 |
|                            |          |       |   |    |    |     |      |          |          |  | YRVLAAI  | 2  | 1 | 1 |
|                            |          |       |   |    |    |     |      |          |          |  | AALTSTC  | 2  | 1 | 1 |
|                            |          |       |   |    |    |     |      |          |          |  | AALTSTC  | 3  | 1 | 1 |
|                            |          |       |   |    |    |     |      |          |          |  | FLDAPGC  | 2  | 1 | 1 |
|                            |          |       |   |    |    |     |      |          |          |  | HETHNYI  | 3  | 1 | 1 |
|                            |          |       |   |    |    |     |      |          |          |  | SQLERIA' | 2  | 1 | 1 |
|                            |          |       |   |    |    |     |      |          |          |  | SVLmYPE  | 1  | 1 | 1 |
|                            |          |       |   |    |    |     |      |          |          |  | fLDAPGQ  | 2  | 1 | 1 |
| Rv3823c, 15610959 PROBABI  | 1602.858 | 9.46  | 1 | 8  | 8  | 49  | 1089 | 115.9252 | 9.246582 |  | EAGLQSV  | 3  | 1 | 1 |
|                            |          |       |   |    |    |     |      |          |          |  | HPVAILP: | 12 | 1 | 1 |
|                            |          |       |   |    |    |     |      |          |          |  | DTRDVV]  | 2  | 1 | 1 |
|                            |          |       |   |    |    |     |      |          |          |  | DVVMLQ   | 7  | 1 | 1 |
|                            |          |       |   |    |    |     |      |          |          |  | DVVmLQ   | 11 | 1 | 1 |
|                            |          |       |   |    |    |     |      |          |          |  | SYKELVI  | 2  | 1 | 1 |
|                            |          |       |   |    |    |     |      |          |          |  | SYKELVI  | 1  | 1 | 1 |
|                            |          |       |   |    |    |     |      |          |          |  | QmTAAFI  | 1  | 1 | 1 |

|                   |                      |          |          |      |    |    |     |     |          |          |                      |                      |    |   |   |
|-------------------|----------------------|----------|----------|------|----|----|-----|-----|----------|----------|----------------------|----------------------|----|---|---|
|                   |                      |          |          |      |    |    |     |     |          |          | VADIVEF              | 7                    | 1  | 1 |   |
|                   |                      |          |          |      |    |    |     |     |          |          | DTRDVV <sub>1</sub>  | 2                    | 1  | 1 |   |
|                   |                      |          |          |      |    |    |     |     |          |          | QMTAAF               | 1                    | 1  | 1 |   |
| Rv3435c, 15610571 | PROBABI              | 3752.087 | 27.11    | 1    | 7  | 7  | 94  | 284 | 30.60332 | 8.221191 | LPGWNV               | 23                   | 1  | 1 |   |
|                   |                      |          |          |      |    |    |     |     |          |          | VSVTFVI              | 25                   | 1  | 1 |   |
|                   |                      |          |          |      |    |    |     |     |          |          | TWSSGSI              | 11                   | 1  | 1 |   |
|                   |                      |          |          |      |    |    |     |     |          |          | SGPITVQ <sub>1</sub> | 24                   | 1  | 1 |   |
|                   |                      |          |          |      |    |    |     |     |          |          | VSVTFVI              | 6                    | 1  | 1 |   |
|                   |                      |          |          |      |    |    |     |     |          |          | sGPITVQI             | 2                    | 1  | 1 |   |
|                   |                      |          |          |      |    |    |     |     |          |          | GAAHAPI              | 1                    | 1  | 1 |   |
|                   |                      |          |          |      |    |    |     |     |          |          | SGPITVQ <sub>1</sub> | 1                    | 1  | 1 |   |
|                   |                      |          |          |      |    |    |     |     |          |          | vSVTFVD              | 1                    | 1  | 1 |   |
| Rv2219,3          | 15609356             | PROBABI  | 3569.129 | 23.2 | 1  | 5  | 5   | 74  | 250      | 26.84683 | 11.60498             | KAEGQT <sub>1</sub>  | 2  | 1 | 1 |
|                   |                      |          |          |      |    |    |     |     |          |          |                      | VTPGVA <sub>1</sub>  | 23 | 1 | 1 |
|                   |                      |          |          |      |    |    |     |     |          |          |                      | AEGQTG <sub>1</sub>  | 4  | 1 | 1 |
|                   |                      |          |          |      |    |    |     |     |          |          |                      | VIGRPGV              | 43 | 1 | 1 |
|                   |                      |          |          |      |    |    |     |     |          |          |                      | vTPGVAA              | 1  | 1 | 1 |
|                   |                      |          |          |      |    |    |     |     |          |          |                      | LPANITV              | 1  | 1 | 1 |
| Rv3738c, 57117150 | PPE FAM <sub>1</sub> | 2364.924 | 19.68    | 1    | 6  | 6  | 50  | 315 | 31.41589 | 4.55127  | LVSVAI               | 38                   | 1  | 1 |   |
|                   |                      |          |          |      |    |    |     |     |          |          |                      | GAGVLG <sub>1</sub>  | 4  | 1 | 1 |
|                   |                      |          |          |      |    |    |     |     |          |          |                      | ESAAVRF              | 3  | 1 | 1 |
|                   |                      |          |          |      |    |    |     |     |          |          |                      | ESAAVRF              | 1  | 1 | 1 |
|                   |                      |          |          |      |    |    |     |     |          |          |                      | LVSVAI               | 2  | 1 | 1 |
|                   |                      |          |          |      |    |    |     |     |          |          |                      | TADVAP <sub>1</sub>  | 2  | 1 | 1 |
| Rv2625c, 15609762 | PROBABI              | 9548.269 | 32.82    | 1    | 16 | 16 | 237 | 393 | 41.4544  | 9.949707 | SRALVTE              | 6                    | 1  | 1 |   |
|                   |                      |          |          |      |    |    |     |     |          |          |                      | ISTQQLF <sub>1</sub> | 25 | 1 | 1 |
|                   |                      |          |          |      |    |    |     |     |          |          |                      | ALVTEGS              | 38 | 1 | 1 |
|                   |                      |          |          |      |    |    |     |     |          |          |                      | VADAMT               | 20 | 1 | 1 |
|                   |                      |          |          |      |    |    |     |     |          |          |                      | VADAmT               | 21 | 1 | 1 |
|                   |                      |          |          |      |    |    |     |     |          |          |                      | DGSITGL              | 19 | 1 | 1 |
|                   |                      |          |          |      |    |    |     |     |          |          |                      | HSAYPV <sub>1</sub>  | 50 | 1 | 1 |
|                   |                      |          |          |      |    |    |     |     |          |          |                      | STTSVGD              | 21 | 1 | 1 |
|                   |                      |          |          |      |    |    |     |     |          |          |                      | sTTSVGD              | 1  | 1 | 1 |
|                   |                      |          |          |      |    |    |     |     |          |          |                      | vADAMT               | 1  | 1 | 1 |
|                   |                      |          |          |      |    |    |     |     |          |          |                      | HSAYPV <sub>1</sub>  | 2  | 1 | 1 |
|                   |                      |          |          |      |    |    |     |     |          |          |                      | RSTTSVG              | 7  | 1 | 1 |

|          |          |          |          |       |   |    |    |     |      |          |          |          |    |   |   |
|----------|----------|----------|----------|-------|---|----|----|-----|------|----------|----------|----------|----|---|---|
|          |          |          |          |       |   |    |    |     |      |          |          | YVLGERI  | 2  | 1 | 1 |
|          |          |          |          |       |   |    |    |     |      |          |          | LIDVYR   | 16 | 1 | 1 |
|          |          |          |          |       |   |    |    |     |      |          |          | QLRDVAI  | 1  | 1 | 1 |
|          |          |          |          |       |   |    |    |     |      |          |          | DVAPSRF  | 1  | 1 | 1 |
|          |          |          |          |       |   |    |    |     |      |          |          | YVLGERI  | 2  | 1 | 1 |
|          |          |          |          |       |   |    |    |     |      |          |          | QLRDVAI  | 1  | 1 | 1 |
|          |          |          |          |       |   |    |    |     |      |          |          | hSAYPVA  | 2  | 1 | 1 |
|          |          |          |          |       |   |    |    |     |      |          |          | VADAmT   | 1  | 1 | 1 |
| Rv3737,1 | 15610873 | PROBABI  | 2525.934 | 9.26  | 1 | 11 | 11 | 92  | 529  | 54.7413  | 8.763184 | TSGGIDD  | 16 | 1 | 1 |
|          |          |          |          |       |   |    |    |     |      |          |          | tSGGIDDI | 2  | 1 | 1 |
|          |          |          |          |       |   |    |    |     |      |          |          | SRTSGGII | 10 | 1 | 1 |
|          |          |          |          |       |   |    |    |     |      |          |          | LAELDRI  | 37 | 1 | 1 |
|          |          |          |          |       |   |    |    |     |      |          |          | RDPLPVA  | 7  | 1 | 1 |
|          |          |          |          |       |   |    |    |     |      |          |          | KVLDLTI  | 2  | 1 | 1 |
|          |          |          |          |       |   |    |    |     |      |          |          | DPLPVAC  | 6  | 1 | 1 |
|          |          |          |          |       |   |    |    |     |      |          |          | RSRTSGC  | 2  | 1 | 1 |
|          |          |          |          |       |   |    |    |     |      |          |          | VLDLTIR  | 2  | 1 | 1 |
|          |          |          |          |       |   |    |    |     |      |          |          | STDYSRL  | 1  | 1 | 1 |
|          |          |          |          |       |   |    |    |     |      |          |          | GRRDPLF  | 5  | 1 | 1 |
|          |          |          |          |       |   |    |    |     |      |          |          | IAELDRL  | 1  | 1 | 1 |
|          |          |          |          |       |   |    |    |     |      |          |          | STDYSRL  | 1  | 1 | 1 |
| Rv3794,1 | 15610930 | INTEGRA  | 3426.895 | 2.74  | 1 | 4  | 4  | 80  | 1094 | 115.6515 | 9.568848 | DSVAAV   | 2  | 1 | 1 |
|          |          |          |          |       |   |    |    |     |      |          |          | ANQDTV   | 45 | 1 | 1 |
|          |          |          |          |       |   |    |    |     |      |          |          | ANQDTV   | 27 | 1 | 1 |
|          |          |          |          |       |   |    |    |     |      |          |          | VGAQPGI  | 4  | 1 | 1 |
|          |          |          |          |       |   |    |    |     |      |          |          | dSVAAV   | 1  | 1 | 1 |
|          |          |          |          |       |   |    |    |     |      |          |          | aNQDTV   | 1  | 1 | 1 |
| Rv2743c, | 15609880 | POSSIBLE | 4813.257 | 55.56 | 1 | 14 | 14 | 180 | 270  | 28.94345 | 11.3999  | DLTAAAI  | 11 | 1 | 1 |
|          |          |          |          |       |   |    |    |     |      |          |          | GFFSLLG  | 14 | 1 | 1 |
|          |          |          |          |       |   |    |    |     |      |          |          | SYLVPTII | 25 | 1 | 1 |
|          |          |          |          |       |   |    |    |     |      |          |          | DLTAAAI  | 7  | 1 | 1 |
|          |          |          |          |       |   |    |    |     |      |          |          | GFFSLLG  | 12 | 1 | 1 |
|          |          |          |          |       |   |    |    |     |      |          |          | YREELAC  | 21 | 1 | 1 |
|          |          |          |          |       |   |    |    |     |      |          |          | DLTAAAI  | 4  | 1 | 1 |
|          |          |          |          |       |   |    |    |     |      |          |          | GAmLPAI  | 3  | 1 | 1 |
|          |          |          |          |       |   |    |    |     |      |          |          | AVQcSA   | 1  | 1 | 1 |

|          |          |          |          |       |   |    |    |     |     |          |          |          |    |   |   |
|----------|----------|----------|----------|-------|---|----|----|-----|-----|----------|----------|----------|----|---|---|
|          |          |          |          |       |   |    |    |     |     |          |          | GAmLPAI  | 7  | 1 | 1 |
|          |          |          |          |       |   |    |    |     |     |          |          | GAMLPAI  | 6  | 1 | 1 |
|          |          |          |          |       |   |    |    |     |     |          |          | AVQcSAA  | 1  | 1 | 1 |
|          |          |          |          |       |   |    |    |     |     |          |          | LPPPGSA  | 10 | 1 | 1 |
|          |          |          |          |       |   |    |    |     |     |          |          | LPPPGSA  | 7  | 1 | 1 |
|          |          |          |          |       |   |    |    |     |     |          |          | RLPPPGS. | 5  | 1 | 1 |
|          |          |          |          |       |   |    |    |     |     |          |          | gFFSLLG  | 1  | 1 | 1 |
|          |          |          |          |       |   |    |    |     |     |          |          | GAmLPAI  | 7  | 1 | 1 |
|          |          |          |          |       |   |    |    |     |     |          |          | qYNEmV   | 19 | 1 | 1 |
|          |          |          |          |       |   |    |    |     |     |          |          | GAMLPAI  | 2  | 1 | 1 |
|          |          |          |          |       |   |    |    |     |     |          |          | RLPPPGS. | 6  | 1 | 1 |
|          |          |          |          |       |   |    |    |     |     |          |          | WLRSEPI  | 6  | 1 | 1 |
|          |          |          |          |       |   |    |    |     |     |          |          | SELPVR   | 1  | 1 | 1 |
|          |          |          |          |       |   |    |    |     |     |          |          | yREELAG  | 1  | 1 | 1 |
|          |          |          |          |       |   |    |    |     |     |          |          | SELPVR   | 2  | 1 | 1 |
|          |          |          |          |       |   |    |    |     |     |          |          | sYLVPTIN | 1  | 1 | 1 |
| Rv3000,1 | 15610137 | POSSIBLE | 3672.829 | 63.47 | 1 | 19 | 19 | 100 | 219 | 23.38503 | 10.85791 | VGLVAQ.  | 27 | 1 | 1 |
|          |          |          |          |       |   |    |    |     |     |          |          | GASGSGF  | 1  | 1 | 1 |
|          |          |          |          |       |   |    |    |     |     |          |          | VWLDGV   | 4  | 1 | 1 |
|          |          |          |          |       |   |    |    |     |     |          |          | RVGLVAI  | 18 | 1 | 1 |
|          |          |          |          |       |   |    |    |     |     |          |          | vSVVRDE  | 1  | 1 | 1 |
|          |          |          |          |       |   |    |    |     |     |          |          | VSVVRDI  | 14 | 1 | 1 |
|          |          |          |          |       |   |    |    |     |     |          |          | RRVGLV   | 2  | 1 | 1 |
|          |          |          |          |       |   |    |    |     |     |          |          | rVGLVAQ  | 1  | 1 | 1 |
|          |          |          |          |       |   |    |    |     |     |          |          | mAVHGFI  | 1  | 1 | 1 |
|          |          |          |          |       |   |    |    |     |     |          |          | VTELLAF  | 9  | 1 | 1 |
|          |          |          |          |       |   |    |    |     |     |          |          | VGRPDLI  | 5  | 1 | 1 |
|          |          |          |          |       |   |    |    |     |     |          |          | EAFLPHQ  | 6  | 1 | 1 |
|          |          |          |          |       |   |    |    |     |     |          |          | LcLGQSA  | 2  | 1 | 1 |
|          |          |          |          |       |   |    |    |     |     |          |          | LIDPTSGI | 1  | 1 | 1 |
|          |          |          |          |       |   |    |    |     |     |          |          | VGRPDLI  | 1  | 1 | 1 |
|          |          |          |          |       |   |    |    |     |     |          |          | IIDPTSGK | 1  | 1 | 1 |
|          |          |          |          |       |   |    |    |     |     |          |          | AVHGFLI  | 1  | 1 | 1 |
|          |          |          |          |       |   |    |    |     |     |          |          | QVSAHFF  | 1  | 1 | 1 |
|          |          |          |          |       |   |    |    |     |     |          |          | TALIPAI  | 1  | 1 | 1 |
|          |          |          |          |       |   |    |    |     |     |          |          | EAFLPHQ  | 1  | 1 | 1 |

|          |                   |          |       |   |    |    |     |     |          |          |          |    |   |   |
|----------|-------------------|----------|-------|---|----|----|-----|-----|----------|----------|----------|----|---|---|
|          |                   |          |       |   |    |    |     |     |          |          | DEATVLF  | 1  | 1 | 1 |
|          |                   |          |       |   |    |    |     |     |          |          | DEATVLF  | 1  | 1 | 1 |
| Rv3695,4 | 15610831 POSSIBLE | 1155.068 | 31.29 | 1 | 6  | 6  | 38  | 310 | 33.14675 | 8.865723 | APQLDPA  | 10 | 1 | 1 |
|          |                   |          |       |   |    |    |     |     |          |          | IAGDVVA  | 3  | 1 | 1 |
|          |                   |          |       |   |    |    |     |     |          |          | LRPTLPP  | 5  | 1 | 1 |
|          |                   |          |       |   |    |    |     |     |          |          | LGPPPVR  | 1  | 1 | 1 |
|          |                   |          |       |   |    |    |     |     |          |          | IAPPPPC  | 12 | 1 | 1 |
|          |                   |          |       |   |    |    |     |     |          |          | LRPTLPP  | 4  | 1 | 1 |
|          |                   |          |       |   |    |    |     |     |          |          | APQLDPA  | 1  | 1 | 1 |
|          |                   |          |       |   |    |    |     |     |          |          | LGPPVM   | 1  | 1 | 1 |
|          |                   |          |       |   |    |    |     |     |          |          | APQLDPA  | 1  | 1 | 1 |
| Rv3792,1 | 15610928 PROBABI  | 3832.03  | 22.24 | 1 | 19 | 19 | 139 | 643 | 69.47095 | 9.83252  | FVVEDIG  | 15 | 1 | 1 |
|          |                   |          |       |   |    |    |     |     |          |          | ATQIDSW  | 2  | 1 | 1 |
|          |                   |          |       |   |    |    |     |     |          |          | TVVLTAI  | 1  | 1 | 1 |
|          |                   |          |       |   |    |    |     |     |          |          | LAQDVYI  | 28 | 1 | 1 |
|          |                   |          |       |   |    |    |     |     |          |          | TALFADF  | 14 | 1 | 1 |
|          |                   |          |       |   |    |    |     |     |          |          | HGAHNS'  | 3  | 1 | 1 |
|          |                   |          |       |   |    |    |     |     |          |          | tALFADPI | 1  | 1 | 1 |
|          |                   |          |       |   |    |    |     |     |          |          | YYPADA   | 4  | 1 | 1 |
|          |                   |          |       |   |    |    |     |     |          |          | GDRRPPC  | 3  | 1 | 1 |
|          |                   |          |       |   |    |    |     |     |          |          | LAQDVYI  | 25 | 1 | 1 |
|          |                   |          |       |   |    |    |     |     |          |          | TALFADF  | 2  | 1 | 1 |
|          |                   |          |       |   |    |    |     |     |          |          | RPPGSEK  | 1  | 1 | 1 |
|          |                   |          |       |   |    |    |     |     |          |          | YTVDLR   | 25 | 1 | 1 |
|          |                   |          |       |   |    |    |     |     |          |          | LPWQPPI  | 2  | 1 | 1 |
|          |                   |          |       |   |    |    |     |     |          |          | HGAHNS'  | 1  | 1 | 1 |
|          |                   |          |       |   |    |    |     |     |          |          | YTVDLR   | 2  | 1 | 1 |
|          |                   |          |       |   |    |    |     |     |          |          | RYTVDLI  | 5  | 1 | 1 |
|          |                   |          |       |   |    |    |     |     |          |          | RYTVDLI  | 1  | 1 | 1 |
|          |                   |          |       |   |    |    |     |     |          |          | IAQDVYP  | 1  | 1 | 1 |
|          |                   |          |       |   |    |    |     |     |          |          | LPWQPPI  | 1  | 1 | 1 |
|          |                   |          |       |   |    |    |     |     |          |          | TVVLTAI  | 1  | 1 | 1 |
|          |                   |          |       |   |    |    |     |     |          |          | YYPADA   | 1  | 1 | 1 |
| Rv3104c, | 15610241 POSSIBLE | 1631.782 | 36.69 | 1 | 7  | 7  | 40  | 308 | 33.35996 | 6.087402 | HDSLLGE  | 3  | 1 | 1 |
|          |                   |          |       |   |    |    |     |     |          |          | HDSLLGE  | 8  | 1 | 1 |
|          |                   |          |       |   |    |    |     |     |          |          | AVVDIPV  | 12 | 1 | 1 |

|                  |            |         |          |       |   |    |    |     |      |         |          |         |    |   |   |
|------------------|------------|---------|----------|-------|---|----|----|-----|------|---------|----------|---------|----|---|---|
|                  |            |         |          |       |   |    |    |     |      |         |          | IEVDTVT | 11 | 1 | 1 |
|                  |            |         |          |       |   |    |    |     |      |         |          | QYGFQDI | 1  | 1 | 1 |
|                  |            |         |          |       |   |    |    |     |      |         |          | VNEVLH  | 2  | 1 | 1 |
|                  |            |         |          |       |   |    |    |     |      |         |          | TLPGKQF | 2  | 1 | 1 |
|                  |            |         |          |       |   |    |    |     |      |         |          | SSEGEVF | 1  | 1 | 1 |
| Rv3793,1         | 15610929   | INTEGRA | 2259.748 | 10.51 | 1 | 8  | 8  | 58  | 1094 | 117.416 | 9.803223 | NVPLVT  | 12 | 1 | 1 |
|                  |            |         |          |       |   |    |    |     |      |         |          | ANDDLVI | 19 | 1 | 1 |
|                  |            |         |          |       |   |    |    |     |      |         |          | VAAEFV  | 13 | 1 | 1 |
|                  |            |         |          |       |   |    |    |     |      |         |          | VAAEFV  | 5  | 1 | 1 |
|                  |            |         |          |       |   |    |    |     |      |         |          | LTFTAHA | 5  | 1 | 1 |
|                  |            |         |          |       |   |    |    |     |      |         |          | TVLLSTV | 1  | 1 | 1 |
|                  |            |         |          |       |   |    |    |     |      |         |          | SGYDFRF | 2  | 1 | 1 |
|                  |            |         |          |       |   |    |    |     |      |         |          | AVDRGLI | 1  | 1 | 1 |
| Rv1111c,57116830 | hypothetic |         | 3959.32  | 35.47 | 1 | 20 | 20 | 237 | 327  | 36.994  | 10.59424 | LSSLmTG | 1  | 1 | 1 |
|                  |            |         |          |       |   |    |    |     |      |         |          | LSSLMTC | 1  | 1 | 1 |
|                  |            |         |          |       |   |    |    |     |      |         |          | KLSSLMT | 2  | 1 | 1 |
|                  |            |         |          |       |   |    |    |     |      |         |          | SYQPSEP | 34 | 1 | 1 |
|                  |            |         |          |       |   |    |    |     |      |         |          | kLSSLMT | 2  | 1 | 1 |
|                  |            |         |          |       |   |    |    |     |      |         |          | FDSYRSY | 2  | 1 | 1 |
|                  |            |         |          |       |   |    |    |     |      |         |          | RARPSEP | 6  | 1 | 1 |
|                  |            |         |          |       |   |    |    |     |      |         |          | KLSSLMT | 1  | 1 | 1 |
|                  |            |         |          |       |   |    |    |     |      |         |          | KLSSLmT | 3  | 1 | 1 |
|                  |            |         |          |       |   |    |    |     |      |         |          | YEPTYEP | 30 | 1 | 1 |
|                  |            |         |          |       |   |    |    |     |      |         |          | RDNYREI | 5  | 1 | 1 |
|                  |            |         |          |       |   |    |    |     |      |         |          | ARPSEPT | 67 | 1 | 1 |
|                  |            |         |          |       |   |    |    |     |      |         |          | HARPPSE | 37 | 1 | 1 |
|                  |            |         |          |       |   |    |    |     |      |         |          | SRHARPP | 4  | 1 | 1 |
|                  |            |         |          |       |   |    |    |     |      |         |          | LSSLmTG | 1  | 1 | 1 |
|                  |            |         |          |       |   |    |    |     |      |         |          | FDSYRSY | 2  | 1 | 1 |
|                  |            |         |          |       |   |    |    |     |      |         |          | SYQPSEP | 24 | 1 | 1 |
|                  |            |         |          |       |   |    |    |     |      |         |          | HARPPSE | 4  | 1 | 1 |
|                  |            |         |          |       |   |    |    |     |      |         |          | sYQPSEP | 1  | 1 | 1 |
|                  |            |         |          |       |   |    |    |     |      |         |          | RPRPQNI | 1  | 1 | 1 |
|                  |            |         |          |       |   |    |    |     |      |         |          | DNYREE  | 1  | 1 | 1 |
|                  |            |         |          |       |   |    |    |     |      |         |          | aRPSEPT | 2  | 1 | 1 |
|                  |            |         |          |       |   |    |    |     |      |         |          | YEPTYEP | 2  | 1 | 1 |



|          |          |            |          |       |   |    |    |    |     |          |          |          |    |   |   |
|----------|----------|------------|----------|-------|---|----|----|----|-----|----------|----------|----------|----|---|---|
|          |          |            |          |       |   |    |    |    |     |          | RRPRPQN  | 3        | 1  | 1 |   |
|          |          |            |          |       |   |    |    |    |     |          | YQPYAR'  | 1        | 1  | 1 |   |
| Rv2195,7 | 15609332 | Probable R | 2691.611 | 34.73 | 1 | 13 | 13 | 75 | 429 | 46.89304 | 6.150879 | YQGETIY  | 26 | 1 | 1 |
|          |          |            |          |       |   |    |    |    |     |          | KAVLWT   | 2        | 1  | 1 |   |
|          |          |            |          |       |   |    |    |    |     |          | VcSHLGc  | 2        | 1  | 1 |   |
|          |          |            |          |       |   |    |    |    |     |          | ATGTEDC  | 8        | 1  | 1 |   |
|          |          |            |          |       |   |    |    |    |     |          | KGQESFN  | 2        | 1  | 1 |   |
|          |          |            |          |       |   |    |    |    |     |          | ESDGDG1  | 1        | 1  | 1 |   |
|          |          |            |          |       |   |    |    |    |     |          | LQEIAMC  | 2        | 1  | 1 |   |
|          |          |            |          |       |   |    |    |    |     |          | LQEIAmG  | 2        | 1  | 1 |   |
|          |          |            |          |       |   |    |    |    |     |          | AVLWTS   | 4        | 1  | 1 |   |
|          |          |            |          |       |   |    |    |    |     |          | NPVMLIR  | 8        | 1  | 1 |   |
|          |          |            |          |       |   |    |    |    |     |          | yQGETIY  | 1        | 1  | 1 |   |
|          |          |            |          |       |   |    |    |    |     |          | LQEIAMC  | 2        | 1  | 1 |   |
|          |          |            |          |       |   |    |    |    |     |          | MRPEDml  | 1        | 1  | 1 |   |
|          |          |            |          |       |   |    |    |    |     |          | LQEIAMC  | 2        | 1  | 1 |   |
|          |          |            |          |       |   |    |    |    |     |          | NPVmLIR  | 2        | 1  | 1 |   |
|          |          |            |          |       |   |    |    |    |     |          | LQEIAmG  | 1        | 1  | 1 |   |
|          |          |            |          |       |   |    |    |    |     |          | MRPEDM   | 2        | 1  | 1 |   |
|          |          |            |          |       |   |    |    |    |     |          | mRPEDml  | 2        | 1  | 1 |   |
|          |          |            |          |       |   |    |    |    |     |          | IKPSDLG  | 2        | 1  | 1 |   |
|          |          |            |          |       |   |    |    |    |     |          | ILcPcHQS | 3        | 1  | 1 |   |
| Rv2869c, | 15610006 | PROBABI    | 1931.277 | 26.98 | 1 | 9  | 9  | 33 | 404 | 42.80678 | 8.543457 | VGDTPV\$ | 1  | 1 | 1 |
|          |          |            |          |       |   |    |    |    |     |          |          | DGTAVT   | 21 | 1 | 1 |
|          |          |            |          |       |   |    |    |    |     |          |          | AVIGETG  | 1  | 1 | 1 |
|          |          |            |          |       |   |    |    |    |     |          |          | VGDTPV\$ | 2  | 1 | 1 |
|          |          |            |          |       |   |    |    |    |     |          |          | LEQcTGP  | 1  | 1 | 1 |
|          |          |            |          |       |   |    |    |    |     |          |          | AVIGETG  | 1  | 1 | 1 |
|          |          |            |          |       |   |    |    |    |     |          |          | WIPNGQC  | 2  | 1 | 1 |
|          |          |            |          |       |   |    |    |    |     |          |          | SHGSVPI  | 2  | 1 | 1 |
|          |          |            |          |       |   |    |    |    |     |          |          | sGDVVVH  | 1  | 1 | 1 |
|          |          |            |          |       |   |    |    |    |     |          |          | KSHGSVF  | 1  | 1 | 1 |
| Rv2903c, | 15610040 | PROBABI    | 2645.387 | 42.52 | 1 | 14 | 14 | 99 | 294 | 31.86001 | 5.947754 | VIAVGGC  | 20 | 1 | 1 |
|          |          |            |          |       |   |    |    |    |     |          |          | FGSPQPG  | 19 | 1 | 1 |
|          |          |            |          |       |   |    |    |    |     |          |          | VWVMGI   | 6  | 1 | 1 |
|          |          |            |          |       |   |    |    |    |     |          |          | IMVDKLS  | 2  | 1 | 1 |

|                            |          |       |   |    |    |     |      |          |          |  |  |                      |    |   |   |
|----------------------------|----------|-------|---|----|----|-----|------|----------|----------|--|--|----------------------|----|---|---|
|                            |          |       |   |    |    |     |      |          |          |  |  | ImVDKLS              | 3  | 1 | 1 |
|                            |          |       |   |    |    |     |      |          |          |  |  | VWVmGE               | 8  | 1 | 1 |
|                            |          |       |   |    |    |     |      |          |          |  |  | GPPSWNV              | 1  | 1 | 1 |
|                            |          |       |   |    |    |     |      |          |          |  |  | WVQNAL               | 1  | 1 | 1 |
|                            |          |       |   |    |    |     |      |          |          |  |  | RVIAVGC              | 2  | 1 | 1 |
|                            |          |       |   |    |    |     |      |          |          |  |  | VWVMGI               | 5  | 1 | 1 |
|                            |          |       |   |    |    |     |      |          |          |  |  | LIVWPPS              | 16 | 1 | 1 |
|                            |          |       |   |    |    |     |      |          |          |  |  | VWVmGE               | 8  | 1 | 1 |
|                            |          |       |   |    |    |     |      |          |          |  |  | SHNVAVI              | 1  | 1 | 1 |
|                            |          |       |   |    |    |     |      |          |          |  |  | FGSPQPG              | 1  | 1 | 1 |
|                            |          |       |   |    |    |     |      |          |          |  |  | AHcPLlc <sup>7</sup> | 1  | 1 | 1 |
|                            |          |       |   |    |    |     |      |          |          |  |  | LIVWPPS              | 4  | 1 | 1 |
|                            |          |       |   |    |    |     |      |          |          |  |  | WVQNAL               | 1  | 1 | 1 |
| Rv3239c, 15610375 PROBABI  | 5559.788 | 15.94 | 1 | 14 | 14 | 111 | 1048 | 110.1304 | 9.437012 |  |  | ASPDGPL              | 25 | 1 | 1 |
|                            |          |       |   |    |    |     |      |          |          |  |  | LHVDGG               | 26 | 1 | 1 |
|                            |          |       |   |    |    |     |      |          |          |  |  | TLTLLEA              | 9  | 1 | 1 |
|                            |          |       |   |    |    |     |      |          |          |  |  | GADAAL               | 19 | 1 | 1 |
|                            |          |       |   |    |    |     |      |          |          |  |  | tLTLLEA              | 1  | 1 | 1 |
|                            |          |       |   |    |    |     |      |          |          |  |  | HNPLSDY              | 15 | 1 | 1 |
|                            |          |       |   |    |    |     |      |          |          |  |  | TLTLLEA              | 2  | 1 | 1 |
|                            |          |       |   |    |    |     |      |          |          |  |  | RTLTLLE              | 4  | 1 | 1 |
|                            |          |       |   |    |    |     |      |          |          |  |  | gADAALS              | 1  | 1 | 1 |
|                            |          |       |   |    |    |     |      |          |          |  |  | LVDVIGc              | 1  | 1 | 1 |
|                            |          |       |   |    |    |     |      |          |          |  |  | EAMPHIn              | 1  | 1 | 1 |
|                            |          |       |   |    |    |     |      |          |          |  |  | EAMPHIM              | 1  | 1 | 1 |
|                            |          |       |   |    |    |     |      |          |          |  |  | QDGSPKV              | 1  | 1 | 1 |
|                            |          |       |   |    |    |     |      |          |          |  |  | cVSVDLL              | 2  | 1 | 1 |
|                            |          |       |   |    |    |     |      |          |          |  |  | VPGIGDT              | 1  | 1 | 1 |
|                            |          |       |   |    |    |     |      |          |          |  |  | LVDVIGc              | 1  | 1 | 1 |
|                            |          |       |   |    |    |     |      |          |          |  |  | GADAAL               | 1  | 1 | 1 |
| Rv2194,1 15609331 Probable | 1081.212 | 8.57  | 1 | 2  | 2  | 28  | 280  | 29.12004 | 9.715332 |  |  | NPDGSIA              | 27 | 1 | 1 |
|                            |          |       |   |    |    |     |      |          |          |  |  | mPAmRGI              | 1  | 1 | 1 |
| Rv3200c, 15610336 POSSIBLE | 7695.659 | 54.08 | 1 | 18 | 18 | 166 | 355  | 38.10869 | 8.147949 |  |  | QSGADTV              | 29 | 1 | 1 |
|                            |          |       |   |    |    |     |      |          |          |  |  | DDTAVL               | 24 | 1 | 1 |
|                            |          |       |   |    |    |     |      |          |          |  |  | IGAPEVD              | 4  | 1 | 1 |
|                            |          |       |   |    |    |     |      |          |          |  |  | EVEQAEV              | 5  | 1 | 1 |

|                                |          |       |   |    |    |     |     |          |          |  |         |    |   |   |
|--------------------------------|----------|-------|---|----|----|-----|-----|----------|----------|--|---------|----|---|---|
|                                |          |       |   |    |    |     |     |          |          |  | AAAAGL  | 8  | 1 | 1 |
|                                |          |       |   |    |    |     |     |          |          |  | LAGTQH  | 41 | 1 | 1 |
|                                |          |       |   |    |    |     |     |          |          |  | LAGTQH  | 10 | 1 | 1 |
|                                |          |       |   |    |    |     |     |          |          |  | VRNHTV  | 2  | 1 | 1 |
|                                |          |       |   |    |    |     |     |          |          |  | TAVAAM  | 2  | 1 | 1 |
|                                |          |       |   |    |    |     |     |          |          |  | TAVAAm  | 1  | 1 | 1 |
|                                |          |       |   |    |    |     |     |          |          |  | DIVLGVV | 21 | 1 | 1 |
|                                |          |       |   |    |    |     |     |          |          |  | HLRDIVL | 4  | 1 | 1 |
|                                |          |       |   |    |    |     |     |          |          |  | LLGIATT | 2  | 1 | 1 |
|                                |          |       |   |    |    |     |     |          |          |  | DIVLGVV | 6  | 1 | 1 |
|                                |          |       |   |    |    |     |     |          |          |  | EAENQHI | 1  | 1 | 1 |
|                                |          |       |   |    |    |     |     |          |          |  | AAAAGL  | 1  | 1 | 1 |
|                                |          |       |   |    |    |     |     |          |          |  | HLRDIVL | 2  | 1 | 1 |
|                                |          |       |   |    |    |     |     |          |          |  | NHTVVIC | 1  | 1 | 1 |
|                                |          |       |   |    |    |     |     |          |          |  | IGAPEVD | 2  | 1 | 1 |
| Rv3805c, 15610941 PROBABI      | 2618.111 | 19.14 | 1 | 10 | 10 | 70  | 627 | 68.66528 | 9.803223 |  | VIDQIGL | 14 | 1 | 1 |
|                                |          |       |   |    |    |     |     |          |          |  | FYAQATC | 12 | 1 | 1 |
|                                |          |       |   |    |    |     |     |          |          |  | VTYSGIV | 15 | 1 | 1 |
|                                |          |       |   |    |    |     |     |          |          |  | FLSNVLH | 15 | 1 | 1 |
|                                |          |       |   |    |    |     |     |          |          |  | RFYAQA  | 7  | 1 | 1 |
|                                |          |       |   |    |    |     |     |          |          |  | NLFPDW  | 1  | 1 | 1 |
|                                |          |       |   |    |    |     |     |          |          |  | APITLHR | 2  | 1 | 1 |
|                                |          |       |   |    |    |     |     |          |          |  | WYPGIPC | 1  | 1 | 1 |
|                                |          |       |   |    |    |     |     |          |          |  | vTYSGIV | 1  | 1 | 1 |
|                                |          |       |   |    |    |     |     |          |          |  | VTYSGIV | 1  | 1 | 1 |
|                                |          |       |   |    |    |     |     |          |          |  | YRIDRVP | 1  | 1 | 1 |
| Rv3365c, 15610501 hypothetical | 7100.454 | 21.8  | 1 | 19 | 19 | 142 | 876 | 93.38388 | 6.932129 |  | LADTDVI | 17 | 1 | 1 |
|                                |          |       |   |    |    |     |     |          |          |  | VEAAMA  | 5  | 1 | 1 |
|                                |          |       |   |    |    |     |     |          |          |  | MAIMSDI | 6  | 1 | 1 |
|                                |          |       |   |    |    |     |     |          |          |  | VEAAmA  | 6  | 1 | 1 |
|                                |          |       |   |    |    |     |     |          |          |  | SAmVTL  | 2  | 1 | 1 |
|                                |          |       |   |    |    |     |     |          |          |  | DIAEQVI | 5  | 1 | 1 |
|                                |          |       |   |    |    |     |     |          |          |  | mAIMSDF | 13 | 1 | 1 |
|                                |          |       |   |    |    |     |     |          |          |  | GQMTMC  | 6  | 1 | 1 |
|                                |          |       |   |    |    |     |     |          |          |  | DRVTAY  | 11 | 1 | 1 |
|                                |          |       |   |    |    |     |     |          |          |  | VTAYAPI | 22 | 1 | 1 |

|          |          |         |          |       |   |    |    |     |     |          |          |         |    |   |   |
|----------|----------|---------|----------|-------|---|----|----|-----|-----|----------|----------|---------|----|---|---|
|          |          |         |          |       |   |    |    |     |     |          | mAIImSDP | 5       | 1  | 1 |   |
|          |          |         |          |       |   |    |    |     |     |          | VLADSIG  | 5       | 1  | 1 |   |
|          |          |         |          |       |   |    |    |     |     |          | SAmVTL/  | 1       | 1  | 1 |   |
|          |          |         |          |       |   |    |    |     |     |          | GQMTmQ   | 3       | 1  | 1 |   |
|          |          |         |          |       |   |    |    |     |     |          | DRVTA.Y. | 2       | 1  | 1 |   |
|          |          |         |          |       |   |    |    |     |     |          | VTAYAPI  | 7       | 1  | 1 |   |
|          |          |         |          |       |   |    |    |     |     |          | VDSEQIR  | 3       | 1  | 1 |   |
|          |          |         |          |       |   |    |    |     |     |          | GADLAEI  | 7       | 1  | 1 |   |
|          |          |         |          |       |   |    |    |     |     |          | GQmTmQ   | 6       | 1  | 1 |   |
|          |          |         |          |       |   |    |    |     |     |          | SAMVTL/  | 2       | 1  | 1 |   |
|          |          |         |          |       |   |    |    |     |     |          | VDSEQIR  | 1       | 1  | 1 |   |
|          |          |         |          |       |   |    |    |     |     |          | NLQQQM   | 2       | 1  | 1 |   |
|          |          |         |          |       |   |    |    |     |     |          | AEmIPAI  | 1       | 1  | 1 |   |
|          |          |         |          |       |   |    |    |     |     |          | KYELQTF  | 1       | 1  | 1 |   |
|          |          |         |          |       |   |    |    |     |     |          | VLADSIG  | 1       | 1  | 1 |   |
|          |          |         |          |       |   |    |    |     |     |          | TQVQGLS  | 1       | 1  | 1 |   |
|          |          |         |          |       |   |    |    |     |     |          | NLQQQm   | 1       | 1  | 1 |   |
| Rv3645,8 | 15610781 | PROBABI | 2892.425 | 26.23 | 1 | 10 | 10 | 83  | 549 | 58.72248 | 6.315918 | ELHDELI | 23 | 1 | 1 |
|          |          |         |          |       |   |    |    |     |     |          | FEYTVIG  | 11      | 1  | 1 |   |
|          |          |         |          |       |   |    |    |     |     |          | FQGDAAI  | 2       | 1  | 1 |   |
|          |          |         |          |       |   |    |    |     |     |          | AIAGHIG. | 5       | 1  | 1 |   |
|          |          |         |          |       |   |    |    |     |     |          | VVETV.   | 10      | 1  | 1 |   |
|          |          |         |          |       |   |    |    |     |     |          | WALSEV   | 10      | 1  | 1 |   |
|          |          |         |          |       |   |    |    |     |     |          | GNYNAH   | 5       | 1  | 1 |   |
|          |          |         |          |       |   |    |    |     |     |          | GNYNAH   | 1       | 1  | 1 |   |
|          |          |         |          |       |   |    |    |     |     |          | GNYNAH   | 4       | 1  | 1 |   |
|          |          |         |          |       |   |    |    |     |     |          | GTELGGC  | 1       | 1  | 1 |   |
|          |          |         |          |       |   |    |    |     |     |          | YVGEDV.  | 3       | 1  | 1 |   |
|          |          |         |          |       |   |    |    |     |     |          | LRDLFGR  | 7       | 1  | 1 |   |
|          |          |         |          |       |   |    |    |     |     |          | gNYNAHr  | 1       | 1  | 1 |   |
| Rv3743c, | 15610879 | PROBABI | 7601.59  | 25    | 1 | 18 | 18 | 180 | 660 | 68.60201 | 8.851074 | SELTQT  | 17 | 1 | 1 |
|          |          |         |          |       |   |    |    |     |     |          | LTVVGD   | 22      | 1  | 1 |   |
|          |          |         |          |       |   |    |    |     |     |          | LPTVGEF  | 5       | 1  | 1 |   |
|          |          |         |          |       |   |    |    |     |     |          | GTPELAC  | 17      | 1  | 1 |   |
|          |          |         |          |       |   |    |    |     |     |          | LAAAAE'  | 3       | 1  | 1 |   |
|          |          |         |          |       |   |    |    |     |     |          | LTVVGD   | 20      | 1  | 1 |   |

|          |          |            |          |       |   |    |    |     |     |          |          |         |    |   |   |
|----------|----------|------------|----------|-------|---|----|----|-----|-----|----------|----------|---------|----|---|---|
|          |          |            |          |       |   |    |    |     |     |          |          | LGVQVG  | 24 | 1 | 1 |
|          |          |            |          |       |   |    |    |     |     |          |          | QLQAGG  | 2  | 1 | 1 |
|          |          |            |          |       |   |    |    |     |     |          |          | ATADRLC | 10 | 1 | 1 |
|          |          |            |          |       |   |    |    |     |     |          |          | RFTDDEL | 26 | 1 | 1 |
|          |          |            |          |       |   |    |    |     |     |          |          | IAFDKTG | 2  | 1 | 1 |
|          |          |            |          |       |   |    |    |     |     |          |          | AGLLPDI | 3  | 1 | 1 |
|          |          |            |          |       |   |    |    |     |     |          |          | IRLPTVG | 6  | 1 | 1 |
|          |          |            |          |       |   |    |    |     |     |          |          | LTGAKPV | 2  | 1 | 1 |
|          |          |            |          |       |   |    |    |     |     |          |          | FTDDELL | 15 | 1 | 1 |
|          |          |            |          |       |   |    |    |     |     |          |          | AGLLPDI | 1  | 1 | 1 |
|          |          |            |          |       |   |    |    |     |     |          |          | VAAVRQ  | 1  | 1 | 1 |
|          |          |            |          |       |   |    |    |     |     |          |          | LAAAAE  | 2  | 1 | 1 |
|          |          |            |          |       |   |    |    |     |     |          |          | aGLLPDD | 1  | 1 | 1 |
|          |          |            |          |       |   |    |    |     |     |          |          | FTDDELL | 1  | 1 | 1 |
| Rv2601,7 | 57117003 | spermidine | 11727.65 | 50.48 | 1 | 20 | 20 | 316 | 523 | 54.64911 | 5.554199 | SVLVLGC | 22 | 1 | 1 |
|          |          |            |          |       |   |    |    |     |     |          |          | LYSTEFY | 21 | 1 | 1 |
|          |          |            |          |       |   |    |    |     |     |          |          | YTESLVY | 19 | 1 | 1 |
|          |          |            |          |       |   |    |    |     |     |          |          | LYLDGGI | 16 | 1 | 1 |
|          |          |            |          |       |   |    |    |     |     |          |          | GAAVPP  | 9  | 1 | 1 |
|          |          |            |          |       |   |    |    |     |     |          |          | DVNAGSI | 14 | 1 | 1 |
|          |          |            |          |       |   |    |    |     |     |          |          | VHVVIDI | 8  | 1 | 1 |
|          |          |            |          |       |   |    |    |     |     |          |          | HSAYQEI | 17 | 1 | 1 |
|          |          |            |          |       |   |    |    |     |     |          |          | ALAPGGI | 22 | 1 | 1 |
|          |          |            |          |       |   |    |    |     |     |          |          | LTDIAPT | 31 | 1 | 1 |
|          |          |            |          |       |   |    |    |     |     |          |          | sVLVLGC | 1  | 1 | 1 |
|          |          |            |          |       |   |    |    |     |     |          |          | VHVVIDI | 18 | 1 | 1 |
|          |          |            |          |       |   |    |    |     |     |          |          | TLDPSTL | 2  | 1 | 1 |
|          |          |            |          |       |   |    |    |     |     |          |          | FLDQQVI | 31 | 1 | 1 |
|          |          |            |          |       |   |    |    |     |     |          |          | ALAPGGI | 8  | 1 | 1 |
|          |          |            |          |       |   |    |    |     |     |          |          | TTLRDV  | 3  | 1 | 1 |
|          |          |            |          |       |   |    |    |     |     |          |          | QQLYADI | 14 | 1 | 1 |
|          |          |            |          |       |   |    |    |     |     |          |          | DEYRYTI | 6  | 1 | 1 |
|          |          |            |          |       |   |    |    |     |     |          |          | GAAVPP  | 22 | 1 | 1 |
|          |          |            |          |       |   |    |    |     |     |          |          | ELLRQPG | 4  | 1 | 1 |
|          |          |            |          |       |   |    |    |     |     |          |          | TLDPSTL | 2  | 1 | 1 |
|          |          |            |          |       |   |    |    |     |     |          |          | SAGYAV  | 22 | 1 | 1 |

|          |          |          |          |       |   |    |    |     |     |          |          |         |    |   |   |
|----------|----------|----------|----------|-------|---|----|----|-----|-----|----------|----------|---------|----|---|---|
|          |          |          |          |       |   |    |    |     |     |          | HSAYQEI  | 2       | 1  | 1 |   |
|          |          |          |          |       |   |    |    |     |     |          | DPDTPVI  | 1       | 1  | 1 |   |
|          |          |          |          |       |   |    |    |     |     |          | ITDIAPTP | 1       | 1  | 1 |   |
| Rv3428c, | 15610564 | POSSIBLE | 5433.881 | 58.05 | 1 | 26 | 26 | 194 | 410 | 45.46523 | 8.968262 | HTAELVC | 12 | 1 | 1 |
|          |          |          |          |       |   |    |    |     |     |          | SYAELAS  | 27      | 1  | 1 |   |
|          |          |          |          |       |   |    |    |     |     |          | HTAELVC  | 3       | 1  | 1 |   |
|          |          |          |          |       |   |    |    |     |     |          | TAGDVV   | 22      | 1  | 1 |   |
|          |          |          |          |       |   |    |    |     |     |          | mFEAVEC  | 14      | 1  | 1 |   |
|          |          |          |          |       |   |    |    |     |     |          | EFDSLAC  | 12      | 1  | 1 |   |
|          |          |          |          |       |   |    |    |     |     |          | GREFDSL  | 1       | 1  | 1 |   |
|          |          |          |          |       |   |    |    |     |     |          | SAQGVLC  | 16      | 1  | 1 |   |
|          |          |          |          |       |   |    |    |     |     |          | TGVDPKI  | 5       | 1  | 1 |   |
|          |          |          |          |       |   |    |    |     |     |          | AFELTSW  | 2       | 1  | 1 |   |
|          |          |          |          |       |   |    |    |     |     |          | sYAELAS  | 1       | 1  | 1 |   |
|          |          |          |          |       |   |    |    |     |     |          | MFEAVEC  | 10      | 1  | 1 |   |
|          |          |          |          |       |   |    |    |     |     |          | ALEGAQI  | 11      | 1  | 1 |   |
|          |          |          |          |       |   |    |    |     |     |          | DNAIHHL  | 1       | 1  | 1 |   |
|          |          |          |          |       |   |    |    |     |     |          | STDFSHY  | 6       | 1  | 1 |   |
|          |          |          |          |       |   |    |    |     |     |          | VERPMTY  | 4       | 1  | 1 |   |
|          |          |          |          |       |   |    |    |     |     |          | AIEVGDP  | 14      | 1  | 1 |   |
|          |          |          |          |       |   |    |    |     |     |          | EFDSLAC  | 1       | 1  | 1 |   |
|          |          |          |          |       |   |    |    |     |     |          | VERPmTY  | 10      | 1  | 1 |   |
|          |          |          |          |       |   |    |    |     |     |          | ALYSVPV  | 1       | 1  | 1 |   |
|          |          |          |          |       |   |    |    |     |     |          | sAQGVLC  | 1       | 1  | 1 |   |
|          |          |          |          |       |   |    |    |     |     |          | YLRALEC  | 1       | 1  | 1 |   |
|          |          |          |          |       |   |    |    |     |     |          | LVcDNLR  | 2       | 1  | 1 |   |
|          |          |          |          |       |   |    |    |     |     |          | SYAELAS  | 2       | 1  | 1 |   |
|          |          |          |          |       |   |    |    |     |     |          | TPTWcR   | 2       | 1  | 1 |   |
|          |          |          |          |       |   |    |    |     |     |          | HGcDRLE  | 2       | 1  | 1 |   |
|          |          |          |          |       |   |    |    |     |     |          | ALEGAQI  | 3       | 1  | 1 |   |
|          |          |          |          |       |   |    |    |     |     |          | LEAAcAR  | 1       | 1  | 1 |   |
|          |          |          |          |       |   |    |    |     |     |          | DSFWKGI  | 2       | 1  | 1 |   |
|          |          |          |          |       |   |    |    |     |     |          | IAFHMR   | 1       | 1  | 1 |   |
|          |          |          |          |       |   |    |    |     |     |          | DKHGcDI  | 2       | 1  | 1 |   |
|          |          |          |          |       |   |    |    |     |     |          | tGVDPKD  | 1       | 1  | 1 |   |
|          |          |          |          |       |   |    |    |     |     |          | sTDFSHY  | 1       | 1  | 1 |   |

|                              |          |       |   |    |    |     |     |          |          |          |    |   |   |
|------------------------------|----------|-------|---|----|----|-----|-----|----------|----------|----------|----|---|---|
| Rv2284,2 15609421 Probable e | 5138.128 | 59.16 | 1 | 19 | 19 | 179 | 431 | 46.65226 | 9.319824 | TANmQS'  | 23 | 1 | 1 |
|                              |          |       |   |    |    |     |     |          |          | DYAHDG   | 13 | 1 | 1 |
|                              |          |       |   |    |    |     |     |          |          | FQPGFEE  | 16 | 1 | 1 |
|                              |          |       |   |    |    |     |     |          |          | NDSLVPV  | 12 | 1 | 1 |
|                              |          |       |   |    |    |     |     |          |          | QVSKQPV  | 1  | 1 | 1 |
|                              |          |       |   |    |    |     |     |          |          | IYRDYAF  | 8  | 1 | 1 |
|                              |          |       |   |    |    |     |     |          |          | VQAAVPI  | 22 | 1 | 1 |
|                              |          |       |   |    |    |     |     |          |          | TANMQS'  | 11 | 1 | 1 |
|                              |          |       |   |    |    |     |     |          |          | GQAHPLr  | 9  | 1 | 1 |
|                              |          |       |   |    |    |     |     |          |          | RPDLDLT  | 2  | 1 | 1 |
|                              |          |       |   |    |    |     |     |          |          | TASAGLV  | 6  | 1 | 1 |
|                              |          |       |   |    |    |     |     |          |          | GQAHPLM  | 2  | 1 | 1 |
|                              |          |       |   |    |    |     |     |          |          | RPDLDLT  | 4  | 1 | 1 |
|                              |          |       |   |    |    |     |     |          |          | LQDAmH   | 8  | 1 | 1 |
|                              |          |       |   |    |    |     |     |          |          | QPVVYAJ  | 4  | 1 | 1 |
|                              |          |       |   |    |    |     |     |          |          | NTWPDH   | 2  | 1 | 1 |
|                              |          |       |   |    |    |     |     |          |          | LQDAMH   | 2  | 1 | 1 |
|                              |          |       |   |    |    |     |     |          |          | LQDAMH   | 9  | 1 | 1 |
|                              |          |       |   |    |    |     |     |          |          | NTWPDH   | 1  | 1 | 1 |
|                              |          |       |   |    |    |     |     |          |          | AHISEYG  | 6  | 1 | 1 |
|                              |          |       |   |    |    |     |     |          |          | ANHLDIV  | 6  | 1 | 1 |
|                              |          |       |   |    |    |     |     |          |          | RTASAGI  | 1  | 1 | 1 |
|                              |          |       |   |    |    |     |     |          |          | LQDAmH   | 8  | 1 | 1 |
| nDSLVPV                      | 1        | 1     | 1 |    |    |     |     |          |          |          |    |   |   |
| tANmQSY                      | 1        | 1     | 1 |    |    |     |     |          |          |          |    |   |   |
| RPAGGG'                      | 1        | 1     | 1 |    |    |     |     |          |          |          |    |   |   |
| Rv2874,1 15610011 POSSIBLE   | 2130.011 | 30.79 | 1 | 15 | 15 | 51  | 695 | 74.12224 | 9.656738 | WALDYQ   | 1  | 1 | 1 |
|                              |          |       |   |    |    |     |     |          |          | LPQPSST' | 3  | 1 | 1 |
|                              |          |       |   |    |    |     |     |          |          | FGEGDYI  | 3  | 1 | 1 |
|                              |          |       |   |    |    |     |     |          |          | YWPAEY   | 13 | 1 | 1 |
|                              |          |       |   |    |    |     |     |          |          | LASETLE  | 3  | 1 | 1 |
|                              |          |       |   |    |    |     |     |          |          | HIKFGEG  | 3  | 1 | 1 |
|                              |          |       |   |    |    |     |     |          |          | AALTPET  | 1  | 1 | 1 |
|                              |          |       |   |    |    |     |     |          |          | DGKPATI  | 3  | 1 | 1 |
|                              |          |       |   |    |    |     |     |          |          | NRYWPA   | 11 | 1 | 1 |
| GAANLGI                      | 1        | 1     | 1 |    |    |     |     |          |          |          |    |   |   |

|                           |          |       |   |    |    |     |      |          |          |  |          |    |   |   |
|---------------------------|----------|-------|---|----|----|-----|------|----------|----------|--|----------|----|---|---|
|                           |          |       |   |    |    |     |      |          |          |  | AIPHVVG  | 2  | 1 | 1 |
|                           |          |       |   |    |    |     |      |          |          |  | VVNYGG   | 1  | 1 | 1 |
|                           |          |       |   |    |    |     |      |          |          |  | hIKFGEGI | 3  | 1 | 1 |
|                           |          |       |   |    |    |     |      |          |          |  | DSGLAVI  | 1  | 1 | 1 |
|                           |          |       |   |    |    |     |      |          |          |  | QLLNDAI  | 1  | 1 | 1 |
|                           |          |       |   |    |    |     |      |          |          |  | GRWALD   | 1  | 1 | 1 |
| Rv3239c, 15610375 PROBABI | 9897.346 | 21.56 | 1 | 26 | 26 | 263 | 1048 | 110.1304 | 9.437012 |  | SIGLVLG  | 20 | 1 | 1 |
|                           |          |       |   |    |    |     |      |          |          |  | GEVLGEI  | 20 | 1 | 1 |
|                           |          |       |   |    |    |     |      |          |          |  | VQVLQD:  | 3  | 1 | 1 |
|                           |          |       |   |    |    |     |      |          |          |  | sIGLVLG  | 2  | 1 | 1 |
|                           |          |       |   |    |    |     |      |          |          |  | LREAPP   | 9  | 1 | 1 |
|                           |          |       |   |    |    |     |      |          |          |  | AQFDEIA  | 2  | 1 | 1 |
|                           |          |       |   |    |    |     |      |          |          |  | GADLVL   | 16 | 1 | 1 |
|                           |          |       |   |    |    |     |      |          |          |  | VADKVV   | 12 | 1 | 1 |
|                           |          |       |   |    |    |     |      |          |          |  | IVLVAGL  | 23 | 1 | 1 |
|                           |          |       |   |    |    |     |      |          |          |  | GFAHLGV  | 31 | 1 | 1 |
|                           |          |       |   |    |    |     |      |          |          |  | NPVQmP/  | 10 | 1 | 1 |
|                           |          |       |   |    |    |     |      |          |          |  | ELGRGEV  | 14 | 1 | 1 |
|                           |          |       |   |    |    |     |      |          |          |  | RQWEELI  | 6  | 1 | 1 |
|                           |          |       |   |    |    |     |      |          |          |  | VQVLQD:  | 8  | 1 | 1 |
|                           |          |       |   |    |    |     |      |          |          |  | NPVQMP:  | 2  | 1 | 1 |
|                           |          |       |   |    |    |     |      |          |          |  | QWEELIT  | 10 | 1 | 1 |
|                           |          |       |   |    |    |     |      |          |          |  | TNRNPV   | 16 | 1 | 1 |
|                           |          |       |   |    |    |     |      |          |          |  | TNRNPV   | 3  | 1 | 1 |
|                           |          |       |   |    |    |     |      |          |          |  | iVLVAGL  | 1  | 1 | 1 |
|                           |          |       |   |    |    |     |      |          |          |  | SVHVVF   | 4  | 1 | 1 |
|                           |          |       |   |    |    |     |      |          |          |  | ARGADL   | 2  | 1 | 1 |
|                           |          |       |   |    |    |     |      |          |          |  | GEVLGEI  | 2  | 1 | 1 |
|                           |          |       |   |    |    |     |      |          |          |  | gEVLGEL  | 1  | 1 | 1 |
|                           |          |       |   |    |    |     |      |          |          |  | gFAHLGV  | 1  | 1 | 1 |
|                           |          |       |   |    |    |     |      |          |          |  | VVLHAA   | 2  | 1 | 1 |
|                           |          |       |   |    |    |     |      |          |          |  | GADLVL   | 3  | 1 | 1 |
|                           |          |       |   |    |    |     |      |          |          |  | sVHVVF   | 1  | 1 | 1 |
|                           |          |       |   |    |    |     |      |          |          |  | RILENVR  | 8  | 1 | 1 |
|                           |          |       |   |    |    |     |      |          |          |  | ILENVRP  | 15 | 1 | 1 |
|                           |          |       |   |    |    |     |      |          |          |  | VADRIVL  | 4  | 1 | 1 |



|          |          |         |          |       |   |    |    |     |     |         |          |         |    |   |   |
|----------|----------|---------|----------|-------|---|----|----|-----|-----|---------|----------|---------|----|---|---|
|          |          |         |          |       |   |    |    |     |     |         | tNRNPVQ  | 1       | 1  | 1 |   |
|          |          |         |          |       |   |    |    |     |     |         | VADKVV   | 2       | 1  | 1 |   |
|          |          |         |          |       |   |    |    |     |     |         | EAPPPAT  | 4       | 1  | 1 |   |
|          |          |         |          |       |   |    |    |     |     |         | VVLHAA   | 2       | 1  | 1 |   |
|          |          |         |          |       |   |    |    |     |     |         | vADKVVI  | 2       | 1  | 1 |   |
|          |          |         |          |       |   |    |    |     |     |         | vADKVVI  | 1       | 1  | 1 |   |
| Rv2942,1 | 15610079 | CONSERV | 9204.968 | 29.89 | 1 | 24 | 24 | 189 | 920 | 95.0624 | 8.851074 | NLSADFA | 16 | 1 | 1 |
|          |          |         |          |       |   |    |    |     |     |         | LFLYSDG  | 29      | 1  | 1 |   |
|          |          |         |          |       |   |    |    |     |     |         | ISAISTQT | 15      | 1  | 1 |   |
|          |          |         |          |       |   |    |    |     |     |         | SIIEQMSC | 6       | 1  | 1 |   |
|          |          |         |          |       |   |    |    |     |     |         | ISAISTQT | 13      | 1  | 1 |   |
|          |          |         |          |       |   |    |    |     |     |         | SIIEQmSC | 2       | 1  | 1 |   |
|          |          |         |          |       |   |    |    |     |     |         | VIEPYDI  | 2       | 1  | 1 |   |
|          |          |         |          |       |   |    |    |     |     |         | LADQLG   | 4       | 1  | 1 |   |
|          |          |         |          |       |   |    |    |     |     |         | QGGAQV   | 4       | 1  | 1 |   |
|          |          |         |          |       |   |    |    |     |     |         | ESMFSSD  | 9       | 1  | 1 |   |
|          |          |         |          |       |   |    |    |     |     |         | DPAALIA  | 2       | 1  | 1 |   |
|          |          |         |          |       |   |    |    |     |     |         | KVESAA   | 2       | 1  | 1 |   |
|          |          |         |          |       |   |    |    |     |     |         | KVIEPYD  | 1       | 1  | 1 |   |
|          |          |         |          |       |   |    |    |     |     |         | sIIEQMSC | 1       | 1  | 1 |   |
|          |          |         |          |       |   |    |    |     |     |         | QAQQYL   | 5       | 1  | 1 |   |
|          |          |         |          |       |   |    |    |     |     |         | QAQQYL   | 6       | 1  | 1 |   |
|          |          |         |          |       |   |    |    |     |     |         | KVIEPYD  | 2       | 1  | 1 |   |
|          |          |         |          |       |   |    |    |     |     |         | DLRDPA   | 27      | 1  | 1 |   |
|          |          |         |          |       |   |    |    |     |     |         | ESmFSSD  | 7       | 1  | 1 |   |
|          |          |         |          |       |   |    |    |     |     |         | AQQLEIA  | 4       | 1  | 1 |   |
|          |          |         |          |       |   |    |    |     |     |         | VIEPYDI  | 1       | 1  | 1 |   |
|          |          |         |          |       |   |    |    |     |     |         | HVRESmI  | 1       | 1  | 1 |   |
|          |          |         |          |       |   |    |    |     |     |         | LVEVPG   | 13      | 1  | 1 |   |
|          |          |         |          |       |   |    |    |     |     |         | HVRESMI  | 3       | 1  | 1 |   |
|          |          |         |          |       |   |    |    |     |     |         | QGGAQV   | 1       | 1  | 1 |   |
|          |          |         |          |       |   |    |    |     |     |         | LETTIQD  | 1       | 1  | 1 |   |
|          |          |         |          |       |   |    |    |     |     |         | SALAQVI  | 1       | 1  | 1 |   |
|          |          |         |          |       |   |    |    |     |     |         | DLRDPA   | 1       | 1  | 1 |   |
|          |          |         |          |       |   |    |    |     |     |         | sALAQVR  | 1       | 1  | 1 |   |
|          |          |         |          |       |   |    |    |     |     |         | KDLADP   | 3       | 1  | 1 |   |

|                             |          |       |   |    |    |     |     |          |          |  |          |    |   |   |
|-----------------------------|----------|-------|---|----|----|-----|-----|----------|----------|--|----------|----|---|---|
|                             |          |       |   |    |    |     |     |          |          |  | kVIEPYDI | 1  | 1 | 1 |
|                             |          |       |   |    |    |     |     |          |          |  | MVAQMF   | 1  | 1 | 1 |
|                             |          |       |   |    |    |     |     |          |          |  | dLRDPAA  | 2  | 1 | 1 |
|                             |          |       |   |    |    |     |     |          |          |  | DLADPSY  | 2  | 1 | 1 |
| Rv2587c,15609724 protein ex | 7823.234 | 35.78 | 1 | 13 | 13 | 168 | 573 | 60.22969 | 8.79248  |  | TQISGGD  | 25 | 1 | 1 |
|                             |          |       |   |    |    |     |     |          |          |  | QSTNQYI  | 26 | 1 | 1 |
|                             |          |       |   |    |    |     |     |          |          |  | EALAQAQ  | 28 | 1 | 1 |
|                             |          |       |   |    |    |     |     |          |          |  | TAYLLAF  | 3  | 1 | 1 |
|                             |          |       |   |    |    |     |     |          |          |  | QSTNQYI  | 34 | 1 | 1 |
|                             |          |       |   |    |    |     |     |          |          |  | QSTNQYr  | 5  | 1 | 1 |
|                             |          |       |   |    |    |     |     |          |          |  | LGIDLQG  | 12 | 1 | 1 |
|                             |          |       |   |    |    |     |     |          |          |  | TPDGSAF  | 1  | 1 | 1 |
|                             |          |       |   |    |    |     |     |          |          |  | qSTNQYn  | 3  | 1 | 1 |
|                             |          |       |   |    |    |     |     |          |          |  | TAYLLAF  | 2  | 1 | 1 |
|                             |          |       |   |    |    |     |     |          |          |  | GIGYVVI  | 18 | 1 | 1 |
|                             |          |       |   |    |    |     |     |          |          |  | tQISGGDI | 1  | 1 | 1 |
|                             |          |       |   |    |    |     |     |          |          |  | LPLVTcS' | 2  | 1 | 1 |
|                             |          |       |   |    |    |     |     |          |          |  | NLGQTAI  | 1  | 1 | 1 |
|                             |          |       |   |    |    |     |     |          |          |  | QLANVLI  | 2  | 1 | 1 |
|                             |          |       |   |    |    |     |     |          |          |  | VTLTARI  | 2  | 1 | 1 |
|                             |          |       |   |    |    |     |     |          |          |  | GPAANIW  | 1  | 1 | 1 |
|                             |          |       |   |    |    |     |     |          |          |  | qSTNQYM  | 1  | 1 | 1 |
|                             |          |       |   |    |    |     |     |          |          |  | VNGLGV,  | 1  | 1 | 1 |
| Rv2339,15609476 PROBABI     | 5524.82  | 25.88 | 1 | 19 | 19 | 136 | 962 | 104.5453 | 7.166504 |  | SLFDTLD  | 21 | 1 | 1 |
|                             |          |       |   |    |    |     |     |          |          |  | IYIGGTA, | 10 | 1 | 1 |
|                             |          |       |   |    |    |     |     |          |          |  | MNPEML   | 5  | 1 | 1 |
|                             |          |       |   |    |    |     |     |          |          |  | mNPEMLI  | 4  | 1 | 1 |
|                             |          |       |   |    |    |     |     |          |          |  | MNPEML   | 4  | 1 | 1 |
|                             |          |       |   |    |    |     |     |          |          |  | mNPEmLI  | 1  | 1 | 1 |
|                             |          |       |   |    |    |     |     |          |          |  | FVISHESI | 8  | 1 | 1 |
|                             |          |       |   |    |    |     |     |          |          |  | GYAAAD   | 2  | 1 | 1 |
|                             |          |       |   |    |    |     |     |          |          |  | DHLADIE  | 21 | 1 | 1 |
|                             |          |       |   |    |    |     |     |          |          |  | NPAGML'  | 2  | 1 | 1 |
|                             |          |       |   |    |    |     |     |          |          |  | FVISHESI | 12 | 1 | 1 |
|                             |          |       |   |    |    |     |     |          |          |  | NPAGmL'  | 1  | 1 | 1 |
|                             |          |       |   |    |    |     |     |          |          |  | MEALTPC  | 2  | 1 | 1 |

|          |          |         |          |       |   |    |    |    |      |         |          |          |   |   |   |
|----------|----------|---------|----------|-------|---|----|----|----|------|---------|----------|----------|---|---|---|
|          |          |         |          |       |   |    |    |    |      |         |          | ATTSELR  | 2 | 1 | 1 |
|          |          |         |          |       |   |    |    |    |      |         |          | TMMLTM   | 4 | 1 | 1 |
|          |          |         |          |       |   |    |    |    |      |         |          | SYFYWEI  | 4 | 1 | 1 |
|          |          |         |          |       |   |    |    |    |      |         |          | STISGVQ  | 1 | 1 | 1 |
|          |          |         |          |       |   |    |    |    |      |         |          | EIKATTSI | 2 | 1 | 1 |
|          |          |         |          |       |   |    |    |    |      |         |          | VQAITRP  | 2 | 1 | 1 |
|          |          |         |          |       |   |    |    |    |      |         |          | EVLHVSC  | 5 | 1 | 1 |
|          |          |         |          |       |   |    |    |    |      |         |          | TMmLTM   | 4 | 1 | 1 |
|          |          |         |          |       |   |    |    |    |      |         |          | YYLRAG   | 1 | 1 | 1 |
|          |          |         |          |       |   |    |    |    |      |         |          | sLFDTLD  | 1 | 1 | 1 |
|          |          |         |          |       |   |    |    |    |      |         |          | TmMLTm   | 2 | 1 | 1 |
|          |          |         |          |       |   |    |    |    |      |         |          | IAKEVLH  | 1 | 1 | 1 |
|          |          |         |          |       |   |    |    |    |      |         |          | VQAITRP  | 6 | 1 | 1 |
|          |          |         |          |       |   |    |    |    |      |         |          | tmMLTMI  | 1 | 1 | 1 |
|          |          |         |          |       |   |    |    |    |      |         |          | VQAITRP  | 5 | 1 | 1 |
|          |          |         |          |       |   |    |    |    |      |         |          | VQAITRP  | 1 | 1 | 1 |
|          |          |         |          |       |   |    |    |    |      |         |          | AGTPVNI  | 1 | 1 | 1 |
| Rv3793,2 | 15610929 | INTEGRA | 1657.753 | 18.74 | 1 | 21 | 21 | 60 | 1094 | 117.416 | 9.803223 | FGAEANS  | 1 | 1 | 1 |
|          |          |         |          |       |   |    |    |    |      |         |          | APLLVVI  | 2 | 1 | 1 |
|          |          |         |          |       |   |    |    |    |      |         |          | LQWATD   | 2 | 1 | 1 |
|          |          |         |          |       |   |    |    |    |      |         |          | LTPYYPC  | 5 | 1 | 1 |
|          |          |         |          |       |   |    |    |    |      |         |          | APLSAIPS | 7 | 1 | 1 |
|          |          |         |          |       |   |    |    |    |      |         |          | DRAPLLV  | 4 | 1 | 1 |
|          |          |         |          |       |   |    |    |    |      |         |          | LQWATD   | 2 | 1 | 1 |
|          |          |         |          |       |   |    |    |    |      |         |          | ATTVASV  | 2 | 1 | 1 |
|          |          |         |          |       |   |    |    |    |      |         |          | LVADDQ   | 5 | 1 | 1 |
|          |          |         |          |       |   |    |    |    |      |         |          | LVADDQ   | 2 | 1 | 1 |
|          |          |         |          |       |   |    |    |    |      |         |          | FGAEANS  | 1 | 1 | 1 |
|          |          |         |          |       |   |    |    |    |      |         |          | LPYNLDF  | 2 | 1 | 1 |
|          |          |         |          |       |   |    |    |    |      |         |          | SNLQALA  | 1 | 1 | 1 |
|          |          |         |          |       |   |    |    |    |      |         |          | NLRAPLS  | 4 | 1 | 1 |
|          |          |         |          |       |   |    |    |    |      |         |          | ILPDRFG  | 1 | 1 | 1 |
|          |          |         |          |       |   |    |    |    |      |         |          | ARLPYNI  | 3 | 1 | 1 |
|          |          |         |          |       |   |    |    |    |      |         |          | AGVQVP   | 2 | 1 | 1 |
|          |          |         |          |       |   |    |    |    |      |         |          | DWGALQ   | 2 | 1 | 1 |
|          |          |         |          |       |   |    |    |    |      |         |          | AGVQVP   | 2 | 1 | 1 |

|          |          |         |          |       |   |    |    |    |     |          |          |          |    |   |   |
|----------|----------|---------|----------|-------|---|----|----|----|-----|----------|----------|----------|----|---|---|
|          |          |         |          |       |   |    |    |    |     |          |          | TPVLGSV  | 4  | 1 | 1 |
|          |          |         |          |       |   |    |    |    |     |          |          | SGWYRL   | 2  | 1 | 1 |
|          |          |         |          |       |   |    |    |    |     |          |          | ATTVASV  | 1  | 1 | 1 |
|          |          |         |          |       |   |    |    |    |     |          |          | ATTVASV  | 1  | 1 | 1 |
|          |          |         |          |       |   |    |    |    |     |          |          | LPTNEQR  | 1  | 1 | 1 |
|          |          |         |          |       |   |    |    |    |     |          |          | iLPDRFG  | 1  | 1 | 1 |
| Rv3835,1 | 15610971 | PROBABI | 1954.762 | 40.31 | 1 | 16 | 16 | 69 | 449 | 47.01374 | 5.186035 | IQQISEEQ | 8  | 1 | 1 |
|          |          |         |          |       |   |    |    |    |     |          |          | TFFPGMEV | 7  | 1 | 1 |
|          |          |         |          |       |   |    |    |    |     |          |          | mTDAYL   | 2  | 1 | 1 |
|          |          |         |          |       |   |    |    |    |     |          |          | mLcGLQS  | 2  | 1 | 1 |
|          |          |         |          |       |   |    |    |    |     |          |          | FEVAESII | 1  | 1 | 1 |
|          |          |         |          |       |   |    |    |    |     |          |          | RMLcGLQ  | 1  | 1 | 1 |
|          |          |         |          |       |   |    |    |    |     |          |          | MTDAYL   | 2  | 1 | 1 |
|          |          |         |          |       |   |    |    |    |     |          |          | TFFPGmEY | 8  | 1 | 1 |
|          |          |         |          |       |   |    |    |    |     |          |          | FEVAESII | 1  | 1 | 1 |
|          |          |         |          |       |   |    |    |    |     |          |          | VASGDcL  | 1  | 1 | 1 |
|          |          |         |          |       |   |    |    |    |     |          |          | FPDALPS  | 1  | 1 | 1 |
|          |          |         |          |       |   |    |    |    |     |          |          | RmLcGLQ  | 1  | 1 | 1 |
|          |          |         |          |       |   |    |    |    |     |          |          | FPDALPS  | 2  | 1 | 1 |
|          |          |         |          |       |   |    |    |    |     |          |          | MTDAYL   | 1  | 1 | 1 |
|          |          |         |          |       |   |    |    |    |     |          |          | TTTLTLIN | 13 | 1 | 1 |
|          |          |         |          |       |   |    |    |    |     |          |          | FTISMLW  | 1  | 1 | 1 |
|          |          |         |          |       |   |    |    |    |     |          |          | INASFNR  | 1  | 1 | 1 |
|          |          |         |          |       |   |    |    |    |     |          |          | mTDAYL   | 1  | 1 | 1 |
|          |          |         |          |       |   |    |    |    |     |          |          | GALLING  | 2  | 1 | 1 |
|          |          |         |          |       |   |    |    |    |     |          |          | FTISmLW  | 1  | 1 | 1 |
|          |          |         |          |       |   |    |    |    |     |          |          | IQQISEEQ | 8  | 1 | 1 |
|          |          |         |          |       |   |    |    |    |     |          |          | VASGDcL  | 1  | 1 | 1 |
|          |          |         |          |       |   |    |    |    |     |          |          | VASGDcL  | 1  | 1 | 1 |
|          |          |         |          |       |   |    |    |    |     |          |          | VASGDcL  | 1  | 1 | 1 |
|          |          |         |          |       |   |    |    |    |     |          |          | tFFPGmEY | 1  | 1 | 1 |
| Rv1854c, | 15608991 | PROBABI | 2053.73  | 39.09 | 1 | 13 | 13 | 52 | 463 | 49.58833 | 9.26123  | VVIIGSGI | 3  | 1 | 1 |
|          |          |         |          |       |   |    |    |    |     |          |          | TTHHLFQ  | 10 | 1 | 1 |
|          |          |         |          |       |   |    |    |    |     |          |          | ILSAFEQ  | 19 | 1 | 1 |
|          |          |         |          |       |   |    |    |    |     |          |          | VWSAGV   | 4  | 1 | 1 |
|          |          |         |          |       |   |    |    |    |     |          |          | ADVDIKI  | 2  | 1 | 1 |

|                  |         |          |       |   |    |    |     |      |          |          |                      |    |   |   |
|------------------|---------|----------|-------|---|----|----|-----|------|----------|----------|----------------------|----|---|---|
|                  |         |          |       |   |    |    |     |      |          |          | AELAGAI              | 1  | 1 | 1 |
|                  |         |          |       |   |    |    |     |      |          |          | SIDDALE              | 4  | 1 | 1 |
|                  |         |          |       |   |    |    |     |      |          |          | VILLDAA              | 2  | 1 | 1 |
|                  |         |          |       |   |    |    |     |      |          |          | VILLDAA              | 1  | 1 | 1 |
|                  |         |          |       |   |    |    |     |      |          |          | GRILSAFI             | 2  | 1 | 1 |
|                  |         |          |       |   |    |    |     |      |          |          | RIESAcK\             | 1  | 1 | 1 |
|                  |         |          |       |   |    |    |     |      |          |          | mSPQQEF              | 1  | 1 | 1 |
|                  |         |          |       |   |    |    |     |      |          |          | LGRDLAI              | 1  | 1 | 1 |
|                  |         |          |       |   |    |    |     |      |          |          | VQVLPDI              | 1  | 1 | 1 |
| Rv2921c,15610058 | PROBABI | 5855.423 | 46.21 | 1 | 19 | 19 | 135 | 422  | 44.00458 | 5.36377  | SGGYTAS              | 36 | 1 | 1 |
|                  |         |          |       |   |    |    |     |      |          |          | GPEGADI              | 1  | 1 | 1 |
|                  |         |          |       |   |    |    |     |      |          |          | AAAADQ               | 14 | 1 | 1 |
|                  |         |          |       |   |    |    |     |      |          |          | IDTSGLP <sub>2</sub> | 11 | 1 | 1 |
|                  |         |          |       |   |    |    |     |      |          |          | GPEGADI              | 2  | 1 | 1 |
|                  |         |          |       |   |    |    |     |      |          |          | GIAAGAI              | 2  | 1 | 1 |
|                  |         |          |       |   |    |    |     |      |          |          | TIADVHL              | 10 | 1 | 1 |
|                  |         |          |       |   |    |    |     |      |          |          | SGGYTAS              | 1  | 1 | 1 |
|                  |         |          |       |   |    |    |     |      |          |          | DVLINEL              | 6  | 1 | 1 |
|                  |         |          |       |   |    |    |     |      |          |          | VVLGAA               | 29 | 1 | 1 |
|                  |         |          |       |   |    |    |     |      |          |          | VQQELG'              | 1  | 1 | 1 |
|                  |         |          |       |   |    |    |     |      |          |          | VFAEVVI              | 1  | 1 | 1 |
|                  |         |          |       |   |    |    |     |      |          |          | GVVDRS(              | 1  | 1 | 1 |
|                  |         |          |       |   |    |    |     |      |          |          | RVVLGA.              | 6  | 1 | 1 |
|                  |         |          |       |   |    |    |     |      |          |          | RTIADVH              | 1  | 1 | 1 |
|                  |         |          |       |   |    |    |     |      |          |          | AVLRDVI              | 7  | 1 | 1 |
|                  |         |          |       |   |    |    |     |      |          |          | VGAADV               | 1  | 1 | 1 |
|                  |         |          |       |   |    |    |     |      |          |          | DVLINEL              | 1  | 1 | 1 |
|                  |         |          |       |   |    |    |     |      |          |          | ISLSPRPE             | 1  | 1 | 1 |
|                  |         |          |       |   |    |    |     |      |          |          | AVLRDVI              | 2  | 1 | 1 |
|                  |         |          |       |   |    |    |     |      |          |          | AVLRDVI              | 1  | 1 | 1 |
| Rv3447c,15610583 | PROBABI | 165.9533 | 3.56  | 1 | 4  | 4  | 4   | 1236 | 131.8132 | 7.400879 | VDYLGYP              | 1  | 1 | 1 |
|                  |         |          |       |   |    |    |     |      |          |          | LVVGQLI              | 1  | 1 | 1 |
|                  |         |          |       |   |    |    |     |      |          |          | TIALGMN              | 1  | 1 | 1 |
|                  |         |          |       |   |    |    |     |      |          |          | IRVGVGS              | 1  | 1 | 1 |
| Rv0169,157116701 | MCE-FAM | 1584.158 | 36.12 | 1 | 8  | 8  | 34  | 454  | 47.75684 | 5.351074 | HDIQQLA              | 14 | 1 | 1 |
|                  |         |          |       |   |    |    |     |      |          |          | GVADLV               | 7  | 1 | 1 |

|                           |          |       |   |    |    |    |      |          |          |  |  |          |   |   |   |
|---------------------------|----------|-------|---|----|----|----|------|----------|----------|--|--|----------|---|---|---|
|                           |          |       |   |    |    |    |      |          |          |  |  | DLWPAP'  | 1 | 1 | 1 |
|                           |          |       |   |    |    |    |      |          |          |  |  | TINAQQA  | 3 | 1 | 1 |
|                           |          |       |   |    |    |    |      |          |          |  |  | GGPGGAI  | 4 | 1 | 1 |
|                           |          |       |   |    |    |    |      |          |          |  |  | VDTISEV  | 1 | 1 | 1 |
|                           |          |       |   |    |    |    |      |          |          |  |  | TQLTmLS  | 1 | 1 | 1 |
|                           |          |       |   |    |    |    |      |          |          |  |  | DLWPAP'  | 2 | 1 | 1 |
|                           |          |       |   |    |    |    |      |          |          |  |  | ITPKDVII | 1 | 1 | 1 |
| Rv3894c,15611030 POSSIBLE | 1493.705 | 15.54 | 1 | 19 | 19 | 48 | 1396 | 153.6044 | 6.442871 |  |  | LADPGES  | 2 | 1 | 1 |
|                           |          |       |   |    |    |    |      |          |          |  |  | TTALVAI  | 2 | 1 | 1 |
|                           |          |       |   |    |    |    |      |          |          |  |  | TTALVAI  | 2 | 1 | 1 |
|                           |          |       |   |    |    |    |      |          |          |  |  | GPEYGVI  | 2 | 1 | 1 |
|                           |          |       |   |    |    |    |      |          |          |  |  | IGVPALA  | 2 | 1 | 1 |
|                           |          |       |   |    |    |    |      |          |          |  |  | LADPGES  | 4 | 1 | 1 |
|                           |          |       |   |    |    |    |      |          |          |  |  | QSLQNV   | 3 | 1 | 1 |
|                           |          |       |   |    |    |    |      |          |          |  |  | TLNRPGF  | 4 | 1 | 1 |
|                           |          |       |   |    |    |    |      |          |          |  |  | VAQLYm   | 1 | 1 | 1 |
|                           |          |       |   |    |    |    |      |          |          |  |  | VAQLYM   | 1 | 1 | 1 |
|                           |          |       |   |    |    |    |      |          |          |  |  | LRESPGL  | 1 | 1 | 1 |
|                           |          |       |   |    |    |    |      |          |          |  |  | qSLLQNV  | 1 | 1 | 1 |
|                           |          |       |   |    |    |    |      |          |          |  |  | ESPGLmII | 3 | 1 | 1 |
|                           |          |       |   |    |    |    |      |          |          |  |  | GLSQEEL  | 1 | 1 | 1 |
|                           |          |       |   |    |    |    |      |          |          |  |  | NSANWA   | 1 | 1 | 1 |
|                           |          |       |   |    |    |    |      |          |          |  |  | NSANWA   | 1 | 1 | 1 |
|                           |          |       |   |    |    |    |      |          |          |  |  | IISLSSR  | 1 | 1 | 1 |
|                           |          |       |   |    |    |    |      |          |          |  |  | tLNRPGF  | 1 | 1 | 1 |
|                           |          |       |   |    |    |    |      |          |          |  |  | IADVAGV  | 1 | 1 | 1 |
|                           |          |       |   |    |    |    |      |          |          |  |  | FSPQQAQ  | 2 | 1 | 1 |
|                           |          |       |   |    |    |    |      |          |          |  |  | ESPGLMI  | 1 | 1 | 1 |
|                           |          |       |   |    |    |    |      |          |          |  |  | qVGLHVF  | 1 | 1 | 1 |
|                           |          |       |   |    |    |    |      |          |          |  |  | IADVAGV  | 1 | 1 | 1 |
|                           |          |       |   |    |    |    |      |          |          |  |  | NSANWA   | 1 | 1 | 1 |
|                           |          |       |   |    |    |    |      |          |          |  |  | eSPGLMII | 1 | 1 | 1 |
|                           |          |       |   |    |    |    |      |          |          |  |  | ALKPWE   | 2 | 1 | 1 |
|                           |          |       |   |    |    |    |      |          |          |  |  | LRESPGL  | 2 | 1 | 1 |
|                           |          |       |   |    |    |    |      |          |          |  |  | DLHAPG'  | 2 | 1 | 1 |
| Rv3479,157117112 POSSIBLE | 3887.565 | 30.17 | 1 | 20 | 20 | 98 | 1021 | 109.1924 | 7.371582 |  |  | VLEEELD  | 4 | 1 | 1 |

|          |          |          |        |       |   |    |    |    |     |          |          |         |   |   |   |
|----------|----------|----------|--------|-------|---|----|----|----|-----|----------|----------|---------|---|---|---|
|          |          |          |        |       |   |    |    |    |     |          | SDADIAA  | 30      | 1 | 1 |   |
|          |          |          |        |       |   |    |    |    |     |          | AMLPAD.  | 2       | 1 | 1 |   |
|          |          |          |        |       |   |    |    |    |     |          | AmLPAD.  | 11      | 1 | 1 |   |
|          |          |          |        |       |   |    |    |    |     |          | DHVAAG   | 6       | 1 | 1 |   |
|          |          |          |        |       |   |    |    |    |     |          | SLLAPDW  | 3       | 1 | 1 |   |
|          |          |          |        |       |   |    |    |    |     |          | YALLNEN  | 1       | 1 | 1 |   |
|          |          |          |        |       |   |    |    |    |     |          | LGAALVI  | 5       | 1 | 1 |   |
|          |          |          |        |       |   |    |    |    |     |          | AWRPTA.  | 14      | 1 | 1 |   |
|          |          |          |        |       |   |    |    |    |     |          | QGSLEN.  | 2       | 1 | 1 |   |
|          |          |          |        |       |   |    |    |    |     |          | ADTNGPC  | 1       | 1 | 1 |   |
|          |          |          |        |       |   |    |    |    |     |          | VVSLTKC  | 1       | 1 | 1 |   |
|          |          |          |        |       |   |    |    |    |     |          | LFDLATT  | 2       | 1 | 1 |   |
|          |          |          |        |       |   |    |    |    |     |          | VLEEELD  | 2       | 1 | 1 |   |
|          |          |          |        |       |   |    |    |    |     |          | LDGAGW   | 6       | 1 | 1 |   |
|          |          |          |        |       |   |    |    |    |     |          | AAFQLAI  | 2       | 1 | 1 |   |
|          |          |          |        |       |   |    |    |    |     |          | ANDWMV   | 1       | 1 | 1 |   |
|          |          |          |        |       |   |    |    |    |     |          | ANDWmV   | 1       | 1 | 1 |   |
|          |          |          |        |       |   |    |    |    |     |          | TLTLSGY  | 1       | 1 | 1 |   |
|          |          |          |        |       |   |    |    |    |     |          | QLPSVLK  | 1       | 1 | 1 |   |
|          |          |          |        |       |   |    |    |    |     |          | LHHFGAI  | 1       | 1 | 1 |   |
|          |          |          |        |       |   |    |    |    |     |          | ADDSRD.  | 1       | 1 | 1 |   |
| Rv3554,6 | 15610690 | POSSIBLE | 3604.5 | 43.07 | 1 | 26 | 26 | 96 | 685 | 76.51734 | 6.946777 | SSSPHAV | 3 | 1 | 1 |
|          |          |          |        |       |   |    |    |    |     |          | NAAISTV  | 4       | 1 | 1 |   |
|          |          |          |        |       |   |    |    |    |     |          | IPVASVD  | 5       | 1 | 1 |   |
|          |          |          |        |       |   |    |    |    |     |          | AIFDLVP  | 14      | 1 | 1 |   |
|          |          |          |        |       |   |    |    |    |     |          | IPVASVD  | 15      | 1 | 1 |   |
|          |          |          |        |       |   |    |    |    |     |          | SDAPYAc  | 2       | 1 | 1 |   |
|          |          |          |        |       |   |    |    |    |     |          | LEILHVL  | 3       | 1 | 1 |   |
|          |          |          |        |       |   |    |    |    |     |          | WLTSTLF  | 3       | 1 | 1 |   |
|          |          |          |        |       |   |    |    |    |     |          | SSSPHAV  | 1       | 1 | 1 |   |
|          |          |          |        |       |   |    |    |    |     |          | AGDVLEI  | 1       | 1 | 1 |   |
|          |          |          |        |       |   |    |    |    |     |          | FGTPLDP  | 5       | 1 | 1 |   |
|          |          |          |        |       |   |    |    |    |     |          | YADRLEI  | 8       | 1 | 1 |   |
|          |          |          |        |       |   |    |    |    |     |          | TDLGGQC  | 5       | 1 | 1 |   |
|          |          |          |        |       |   |    |    |    |     |          | NYSIcAP. | 1       | 1 | 1 |   |
|          |          |          |        |       |   |    |    |    |     |          | ETLIEHG  | 4       | 1 | 1 |   |

|                           |          |       |   |    |    |    |      |          |          |  |          |    |   |   |
|---------------------------|----------|-------|---|----|----|----|------|----------|----------|--|----------|----|---|---|
|                           |          |       |   |    |    |    |      |          |          |  | FEPGQHV  | 2  | 1 | 1 |
|                           |          |       |   |    |    |    |      |          |          |  | DAFRFEP  | 4  | 1 | 1 |
|                           |          |       |   |    |    |    |      |          |          |  | FTLIYGN  | 4  | 1 | 1 |
|                           |          |       |   |    |    |    |      |          |          |  | RNEEAYI  | 2  | 1 | 1 |
|                           |          |       |   |    |    |    |      |          |          |  | AELDRLE  | 1  | 1 | 1 |
|                           |          |       |   |    |    |    |      |          |          |  | NEEAYLE  | 1  | 1 | 1 |
|                           |          |       |   |    |    |    |      |          |          |  | VGAEWL   | 1  | 1 | 1 |
|                           |          |       |   |    |    |    |      |          |          |  | RNYSICAI | 1  | 1 | 1 |
|                           |          |       |   |    |    |    |      |          |          |  | FGTPLDP  | 2  | 1 | 1 |
|                           |          |       |   |    |    |    |      |          |          |  | IHLELFYQ | 3  | 1 | 1 |
|                           |          |       |   |    |    |    |      |          |          |  | IPVASVD  | 1  | 1 | 1 |
| Rv2326c,15609463 POSSIBLE | 1117.859 | 21.81 | 1 | 13 | 13 | 22 | 697  | 72.78937 | 7.122559 |  | ALILDEPI | 3  | 1 | 1 |
|                           |          |       |   |    |    |    |      |          |          |  | LLSEVGL  | 3  | 1 | 1 |
|                           |          |       |   |    |    |    |      |          |          |  | VAAALT'  | 2  | 1 | 1 |
|                           |          |       |   |    |    |    |      |          |          |  | LLSEVGL  | 1  | 1 | 1 |
|                           |          |       |   |    |    |    |      |          |          |  | DALLAVI  | 2  | 1 | 1 |
|                           |          |       |   |    |    |    |      |          |          |  | TALVHIT  | 2  | 1 | 1 |
|                           |          |       |   |    |    |    |      |          |          |  | VVLAGLI  | 1  | 1 | 1 |
|                           |          |       |   |    |    |    |      |          |          |  | LALAAAI  | 1  | 1 | 1 |
|                           |          |       |   |    |    |    |      |          |          |  | DTGSLSC  | 1  | 1 | 1 |
|                           |          |       |   |    |    |    |      |          |          |  | IDQLSGG  | 1  | 1 | 1 |
|                           |          |       |   |    |    |    |      |          |          |  | LGGTAV'  | 2  | 1 | 1 |
|                           |          |       |   |    |    |    |      |          |          |  | AGQDALI  | 2  | 1 | 1 |
|                           |          |       |   |    |    |    |      |          |          |  | RIDQLSG  | 1  | 1 | 1 |
| Rv3479,157117112 POSSIBLE | 3879.669 | 28.8  | 1 | 21 | 21 | 90 | 1021 | 109.1924 | 7.371582 |  | TPSTTLY  | 27 | 1 | 1 |
|                           |          |       |   |    |    |    |      |          |          |  | LGGTFPT  | 8  | 1 | 1 |
|                           |          |       |   |    |    |    |      |          |          |  | VTGSDLC  | 3  | 1 | 1 |
|                           |          |       |   |    |    |    |      |          |          |  | GLAAVT'  | 1  | 1 | 1 |
|                           |          |       |   |    |    |    |      |          |          |  | LLTPSLL' | 8  | 1 | 1 |
|                           |          |       |   |    |    |    |      |          |          |  | EINLLAQ  | 4  | 1 | 1 |
|                           |          |       |   |    |    |    |      |          |          |  | QAQTLTS  | 1  | 1 | 1 |
|                           |          |       |   |    |    |    |      |          |          |  | QQITATII | 11 | 1 | 1 |
|                           |          |       |   |    |    |    |      |          |          |  | LATGPPF  | 2  | 1 | 1 |
|                           |          |       |   |    |    |    |      |          |          |  | LAELAAI  | 7  | 1 | 1 |
|                           |          |       |   |    |    |    |      |          |          |  | GLFTFTE  | 5  | 1 | 1 |
|                           |          |       |   |    |    |    |      |          |          |  | VTGSDLC  | 1  | 1 | 1 |



|          |          |          |          |       |   |    |    |    |     |          |          |        |   |   |   |
|----------|----------|----------|----------|-------|---|----|----|----|-----|----------|----------|--------|---|---|---|
|          |          |          |          |       |   |    |    |    |     |          | LSTcPPES | 1      | 1 | 1 |   |
|          |          |          |          |       |   |    |    |    |     |          | TPSLLYG  | 1      | 1 | 1 |   |
|          |          |          |          |       |   |    |    |    |     |          | VLLFVVF  | 2      | 1 | 1 |   |
|          |          |          |          |       |   |    |    |    |     |          | FGQPAYI  | 1      | 1 | 1 |   |
|          |          |          |          |       |   |    |    |    |     |          | AAFQLAI  | 2      | 1 | 1 |   |
|          |          |          |          |       |   |    |    |    |     |          | SSASFPL  | 1      | 1 | 1 |   |
|          |          |          |          |       |   |    |    |    |     |          | DLWLDL   | 2      | 1 | 1 |   |
|          |          |          |          |       |   |    |    |    |     |          | VTGSDLC  | 1      | 1 | 1 |   |
|          |          |          |          |       |   |    |    |    |     |          | EATKQA   | 1      | 1 | 1 |   |
| Rv3870,7 | 15611006 | POSSIBLE | 1731.705 | 37.22 | 1 | 24 | 24 | 48 | 747 | 80.86182 | 8.001465 | VHLLLA | 4 | 1 | 1 |
|          |          |          |          |       |   |    |    |    |     |          | LPHTAA   | 2      | 1 | 1 |   |
|          |          |          |          |       |   |    |    |    |     |          | vHLLLAT  | 1      | 1 | 1 |   |
|          |          |          |          |       |   |    |    |    |     |          | GPHAPDS  | 1      | 1 | 1 |   |
|          |          |          |          |       |   |    |    |    |     |          | VGAAGA   | 1      | 1 | 1 |   |
|          |          |          |          |       |   |    |    |    |     |          | QEGLSDL  | 3      | 1 | 1 |   |
|          |          |          |          |       |   |    |    |    |     |          | AVIGTPE  | 1      | 1 | 1 |   |
|          |          |          |          |       |   |    |    |    |     |          | MGEVLT   | 1      | 1 | 1 |   |
|          |          |          |          |       |   |    |    |    |     |          | mGEVLT   | 1      | 1 | 1 |   |
|          |          |          |          |       |   |    |    |    |     |          | IRVHEDG  | 1      | 1 | 1 |   |
|          |          |          |          |       |   |    |    |    |     |          | VHEDGT   | 3      | 1 | 1 |   |
|          |          |          |          |       |   |    |    |    |     |          | LPHTAA   | 1      | 1 | 1 |   |
|          |          |          |          |       |   |    |    |    |     |          | VATDWH   | 2      | 1 | 1 |   |
|          |          |          |          |       |   |    |    |    |     |          | aGVTVIT  | 1      | 1 | 1 |   |
|          |          |          |          |       |   |    |    |    |     |          | AGVTVIT  | 2      | 1 | 1 |   |
|          |          |          |          |       |   |    |    |    |     |          | IRVHEDG  | 3      | 1 | 1 |   |
|          |          |          |          |       |   |    |    |    |     |          | mGEVLT   | 3      | 1 | 1 |   |
|          |          |          |          |       |   |    |    |    |     |          | VGMEDP   | 1      | 1 | 1 |   |
|          |          |          |          |       |   |    |    |    |     |          | MGEVLT   | 2      | 1 | 1 |   |
|          |          |          |          |       |   |    |    |    |     |          | GGSTFLC  | 1      | 1 | 1 |   |
|          |          |          |          |       |   |    |    |    |     |          | IDKLEPN  | 2      | 1 | 1 |   |
|          |          |          |          |       |   |    |    |    |     |          | WLPHVQ   | 2      | 1 | 1 |   |
|          |          |          |          |       |   |    |    |    |     |          | qEGLSDL  | 1      | 1 | 1 |   |
|          |          |          |          |       |   |    |    |    |     |          | LPNQSFR  | 1      | 1 | 1 |   |
|          |          |          |          |       |   |    |    |    |     |          | EGAEFG   | 1      | 1 | 1 |   |
|          |          |          |          |       |   |    |    |    |     |          | MYTDTD   | 1      | 1 | 1 |   |
|          |          |          |          |       |   |    |    |    |     |          | QVTSVTI  | 1      | 1 | 1 |   |

|                                |          |      |   |    |    |     |     |          |          |          |    |   |   |
|--------------------------------|----------|------|---|----|----|-----|-----|----------|----------|----------|----|---|---|
|                                |          |      |   |    |    |     |     |          |          | ESGVGFL  | 1  | 1 | 1 |
|                                |          |      |   |    |    |     |     |          |          | mGEVLTG  | 1  | 1 | 1 |
|                                |          |      |   |    |    |     |     |          |          | MGEVLTG  | 1  | 1 | 1 |
| Rv3365c, 15610501 hypothetical | 5773.429 | 36.3 | 1 | 32 | 32 | 135 | 876 | 93.38388 | 6.932129 | ISDSGLGf | 2  | 1 | 1 |
|                                |          |      |   |    |    |     |     |          |          | VAAAIGS  | 22 | 1 | 1 |
|                                |          |      |   |    |    |     |     |          |          | ISDSGLGf | 2  | 1 | 1 |
|                                |          |      |   |    |    |     |     |          |          | NSANLLV  | 10 | 1 | 1 |
|                                |          |      |   |    |    |     |     |          |          | GPVTGEC  | 1  | 1 | 1 |
|                                |          |      |   |    |    |     |     |          |          | SLVDQQI  | 7  | 1 | 1 |
|                                |          |      |   |    |    |     |     |          |          | VAHTDLI  | 4  | 1 | 1 |
|                                |          |      |   |    |    |     |     |          |          | RNSANLI  | 2  | 1 | 1 |
|                                |          |      |   |    |    |     |     |          |          | RTPGSSG  | 3  | 1 | 1 |
|                                |          |      |   |    |    |     |     |          |          | LLVNEmf  | 9  | 1 | 1 |
|                                |          |      |   |    |    |     |     |          |          | LLVNEMI  | 2  | 1 | 1 |
|                                |          |      |   |    |    |     |     |          |          | aLLLAGI  | 1  | 1 | 1 |
|                                |          |      |   |    |    |     |     |          |          | TPGSSGLf | 2  | 1 | 1 |
|                                |          |      |   |    |    |     |     |          |          | LLVNEmf  | 5  | 1 | 1 |
|                                |          |      |   |    |    |     |     |          |          | TPGSSGLf | 2  | 1 | 1 |
|                                |          |      |   |    |    |     |     |          |          | SLVDQQI  | 6  | 1 | 1 |
|                                |          |      |   |    |    |     |     |          |          | LVPGAAV  | 2  | 1 | 1 |
|                                |          |      |   |    |    |     |     |          |          | ISDSGLGf | 3  | 1 | 1 |
|                                |          |      |   |    |    |     |     |          |          | DHREPVI  | 3  | 1 | 1 |
|                                |          |      |   |    |    |     |     |          |          | AGDEPII  | 4  | 1 | 1 |
|                                |          |      |   |    |    |     |     |          |          | RTPGSSG  | 3  | 1 | 1 |
|                                |          |      |   |    |    |     |     |          |          | AGGEVTI  | 1  | 1 | 1 |
|                                |          |      |   |    |    |     |     |          |          | DHREPVI  | 4  | 1 | 1 |
|                                |          |      |   |    |    |     |     |          |          | ALLLAGI  | 2  | 1 | 1 |
|                                |          |      |   |    |    |     |     |          |          | LRAGGEV  | 1  | 1 | 1 |
|                                |          |      |   |    |    |     |     |          |          | hMGLFVv  | 1  | 1 | 1 |
|                                |          |      |   |    |    |     |     |          |          | TDYGLPV  | 1  | 1 | 1 |
|                                |          |      |   |    |    |     |     |          |          | HmGLFVv  | 4  | 1 | 1 |
|                                |          |      |   |    |    |     |     |          |          | SRSLVDQ  | 1  | 1 | 1 |
|                                |          |      |   |    |    |     |     |          |          | NEEDPAF  | 4  | 1 | 1 |
|                                |          |      |   |    |    |     |     |          |          | hAAAVRI  | 2  | 1 | 1 |
|                                |          |      |   |    |    |     |     |          |          | HMGLFVv  | 3  | 1 | 1 |
|                                |          |      |   |    |    |     |     |          |          | LDHLAAI  | 1  | 1 | 1 |

|                            |          |       |   |    |    |    |     |          |          |  |          |         |   |   |   |
|----------------------------|----------|-------|---|----|----|----|-----|----------|----------|--|----------|---------|---|---|---|
|                            |          |       |   |    |    |    |     |          |          |  |          | ISDSGLG | 2 | 1 | 1 |
|                            |          |       |   |    |    |    |     |          |          |  |          | HAAAVR  | 2 | 1 | 1 |
|                            |          |       |   |    |    |    |     |          |          |  |          | MLSEMV  | 1 | 1 | 1 |
|                            |          |       |   |    |    |    |     |          |          |  |          | YSSPTTP | 1 | 1 | 1 |
|                            |          |       |   |    |    |    |     |          |          |  |          | LLVNEmI | 1 | 1 | 1 |
|                            |          |       |   |    |    |    |     |          |          |  |          | LLVNEMI | 4 | 1 | 1 |
|                            |          |       |   |    |    |    |     |          |          |  |          | ALLLAGE | 1 | 1 | 1 |
|                            |          |       |   |    |    |    |     |          |          |  |          | SLVDQQI | 1 | 1 | 1 |
|                            |          |       |   |    |    |    |     |          |          |  |          | TDYGLPV | 1 | 1 | 1 |
|                            |          |       |   |    |    |    |     |          |          |  |          | EPVPLST | 1 | 1 | 1 |
| Rv0151c, 57116694 PE FAMIL | 223.3312 | 11.56 | 1 | 2  | 2  | 9  | 588 | 61.37294 | 4.525879 |  | AIPVIGPF | 5       | 1 | 1 |   |
|                            |          |       |   |    |    |    |     |          |          |  |          | IPGLNVT | 4 | 1 | 1 |
| Rv2748c, 15609885 POSSIBL  | 371.3143 | 9.97  | 1 | 6  | 6  | 8  | 883 | 94.34746 | 8.42627  |  | NIAYAV   | 1       | 1 | 1 |   |
|                            |          |       |   |    |    |    |     |          |          |  |          | EYADDFI | 2 | 1 | 1 |
|                            |          |       |   |    |    |    |     |          |          |  |          | LADVLT  | 1 | 1 | 1 |
|                            |          |       |   |    |    |    |     |          |          |  |          | LAFATSS | 2 | 1 | 1 |
|                            |          |       |   |    |    |    |     |          |          |  |          | LmDLmE  | 1 | 1 | 1 |
|                            |          |       |   |    |    |    |     |          |          |  |          | EYRPYPY | 1 | 1 | 1 |
| Rv3610c, 15610746 MEMBRA   | 1985.067 | 32.37 | 1 | 19 | 19 | 44 | 760 | 81.9349  | 5.846191 |  | AAIAQAT  | 1       | 1 | 1 |   |
|                            |          |       |   |    |    |    |     |          |          |  |          | AAEELVF | 1 | 1 | 1 |
|                            |          |       |   |    |    |    |     |          |          |  |          | TVGmTG  | 2 | 1 | 1 |
|                            |          |       |   |    |    |    |     |          |          |  |          | TmGTQPI | 1 | 1 | 1 |
|                            |          |       |   |    |    |    |     |          |          |  |          | SEmIAQL | 2 | 1 | 1 |
|                            |          |       |   |    |    |    |     |          |          |  |          | EQTLNQI | 3 | 1 | 1 |
|                            |          |       |   |    |    |    |     |          |          |  |          | GAGLGG  | 2 | 1 | 1 |
|                            |          |       |   |    |    |    |     |          |          |  |          | TVGMTG  | 2 | 1 | 1 |
|                            |          |       |   |    |    |    |     |          |          |  |          | SEMIAQL | 1 | 1 | 1 |
|                            |          |       |   |    |    |    |     |          |          |  |          | SEMIAQL | 2 | 1 | 1 |
|                            |          |       |   |    |    |    |     |          |          |  |          | GAGLGG  | 2 | 1 | 1 |
|                            |          |       |   |    |    |    |     |          |          |  |          | EQTLNQI | 2 | 1 | 1 |
|                            |          |       |   |    |    |    |     |          |          |  |          | QYGSTQI | 2 | 1 | 1 |
|                            |          |       |   |    |    |    |     |          |          |  |          | TMGTQPI | 1 | 1 | 1 |
|                            |          |       |   |    |    |    |     |          |          |  |          | TRSEmIA | 3 | 1 | 1 |
|                            |          |       |   |    |    |    |     |          |          |  |          | AAEELVF | 1 | 1 | 1 |
|                            |          |       |   |    |    |    |     |          |          |  |          | TPGELAI | 1 | 1 | 1 |
|                            |          |       |   |    |    |    |     |          |          |  |          | TRSEmIA | 1 | 1 | 1 |

|                               |          |       |   |    |    |    |     |          |          |          |          |   |   |   |
|-------------------------------|----------|-------|---|----|----|----|-----|----------|----------|----------|----------|---|---|---|
|                               |          |       |   |    |    |    |     |          |          |          | TGGHAV.  | 2 | 1 | 1 |
|                               |          |       |   |    |    |    |     |          |          |          | LTmFDDF  | 2 | 1 | 1 |
|                               |          |       |   |    |    |    |     |          |          |          | LTMFDDI  | 2 | 1 | 1 |
|                               |          |       |   |    |    |    |     |          |          |          | SmVTEFC  | 1 | 1 | 1 |
|                               |          |       |   |    |    |    |     |          |          |          | YGSEHGI  | 1 | 1 | 1 |
|                               |          |       |   |    |    |    |     |          |          |          | TmGTQPI  | 2 | 1 | 1 |
|                               |          |       |   |    |    |    |     |          |          |          | VRDLFEQ  | 1 | 1 | 1 |
|                               |          |       |   |    |    |    |     |          |          |          | DFLQNPS  | 1 | 1 | 1 |
|                               |          |       |   |    |    |    |     |          |          |          | TMGTQPI  | 1 | 1 | 1 |
|                               |          |       |   |    |    |    |     |          |          |          | AGVILIA. | 1 | 1 | 1 |
| Rv3193c,15610329 hypothetical | 2954.183 | 38.71 | 1 | 32 | 32 | 73 | 992 | 107.4351 | 9.026855 | IYFGPVIS | 3        | 1 | 1 |   |
|                               |          |       |   |    |    |    |     |          |          |          | NYSGDSF  | 5 | 1 | 1 |
|                               |          |       |   |    |    |    |     |          |          |          | YTYTGSC  | 4 | 1 | 1 |
|                               |          |       |   |    |    |    |     |          |          |          | VEAVAPV  | 2 | 1 | 1 |
|                               |          |       |   |    |    |    |     |          |          |          | DDNSASY  | 1 | 1 | 1 |
|                               |          |       |   |    |    |    |     |          |          |          | VAALQEI  | 2 | 1 | 1 |
|                               |          |       |   |    |    |    |     |          |          |          | QAYGLTS  | 1 | 1 | 1 |
|                               |          |       |   |    |    |    |     |          |          |          | nYSGDSP  | 1 | 1 | 1 |
|                               |          |       |   |    |    |    |     |          |          |          | HTVYTHC  | 3 | 1 | 1 |
|                               |          |       |   |    |    |    |     |          |          |          | GGLLYVI  | 4 | 1 | 1 |
|                               |          |       |   |    |    |    |     |          |          |          | NFLFSNV  | 1 | 1 | 1 |
|                               |          |       |   |    |    |    |     |          |          |          | QAYGLTS  | 6 | 1 | 1 |
|                               |          |       |   |    |    |    |     |          |          |          | DDNSASY  | 1 | 1 | 1 |
|                               |          |       |   |    |    |    |     |          |          |          | LANNAIT  | 2 | 1 | 1 |
|                               |          |       |   |    |    |    |     |          |          |          | NGNLRD'  | 2 | 1 | 1 |
|                               |          |       |   |    |    |    |     |          |          |          | SDIAPEL. | 2 | 1 | 1 |
|                               |          |       |   |    |    |    |     |          |          |          | LLDPTIVS | 2 | 1 | 1 |
|                               |          |       |   |    |    |    |     |          |          |          | NYSGDSF  | 2 | 1 | 1 |
|                               |          |       |   |    |    |    |     |          |          |          | WGNLLT   | 4 | 1 | 1 |
|                               |          |       |   |    |    |    |     |          |          |          | GDFAAYG  | 1 | 1 | 1 |
|                               |          |       |   |    |    |    |     |          |          |          | SITATRQ  | 1 | 1 | 1 |
|                               |          |       |   |    |    |    |     |          |          |          | VEAVAPV  | 1 | 1 | 1 |
|                               |          |       |   |    |    |    |     |          |          |          | NFYFPE   | 1 | 1 | 1 |
|                               |          |       |   |    |    |    |     |          |          |          | VAMMYN   | 1 | 1 | 1 |
|                               |          |       |   |    |    |    |     |          |          |          | SVFAAKF  | 1 | 1 | 1 |
|                               |          |       |   |    |    |    |     |          |          |          | ELNPDR   | 4 | 1 | 1 |

|          |          |         |          |       |   |    |    |     |     |          |          |         |    |   |   |
|----------|----------|---------|----------|-------|---|----|----|-----|-----|----------|----------|---------|----|---|---|
|          |          |         |          |       |   |    |    |     |     |          | wGNLLTI  | 1       | 1  | 1 |   |
|          |          |         |          |       |   |    |    |     |     |          | DYVVAA   | 2       | 1  | 1 |   |
|          |          |         |          |       |   |    |    |     |     |          | qAYGLTS  | 1       | 1  | 1 |   |
|          |          |         |          |       |   |    |    |     |     |          | IRWGNLI  | 2       | 1  | 1 |   |
|          |          |         |          |       |   |    |    |     |     |          | LIDNQRD  | 2       | 1  | 1 |   |
|          |          |         |          |       |   |    |    |     |     |          | LVWIVDC  | 1       | 1  | 1 |   |
|          |          |         |          |       |   |    |    |     |     |          | VAMMYN   | 1       | 1  | 1 |   |
|          |          |         |          |       |   |    |    |     |     |          | YPEDLFK  | 1       | 1  | 1 |   |
|          |          |         |          |       |   |    |    |     |     |          | ILFNRDP  | 2       | 1  | 1 |   |
|          |          |         |          |       |   |    |    |     |     |          | ELNPDR   | 1       | 1  | 1 |   |
|          |          |         |          |       |   |    |    |     |     |          | gGLLYVE  | 1       | 1  | 1 |   |
| Rv0083,1 | 15607225 | PROBABI | 915.4022 | 13.44 | 1 | 8  | 8  | 22  | 640 | 65.58546 | 10.06689 | mQYTAT  | 3  | 1 | 1 |
|          |          |         |          |       |   |    |    |     |     |          | LPLWAcC  | 3       | 1  | 1 |   |
|          |          |         |          |       |   |    |    |     |     |          | MQYTAT   | 3       | 1  | 1 |   |
|          |          |         |          |       |   |    |    |     |     |          | LYTPVVC  | 2       | 1  | 1 |   |
|          |          |         |          |       |   |    |    |     |     |          | VFGDVLI  | 5       | 1  | 1 |   |
|          |          |         |          |       |   |    |    |     |     |          | tAVADAI  | 1       | 1  | 1 |   |
|          |          |         |          |       |   |    |    |     |     |          | TAVADA   | 1       | 1  | 1 |   |
|          |          |         |          |       |   |    |    |     |     |          | ITYRTAV  | 1       | 1  | 1 |   |
|          |          |         |          |       |   |    |    |     |     |          | LYTPVVC  | 1       | 1  | 1 |   |
|          |          |         |          |       |   |    |    |     |     |          | LYTPVVC  | 1       | 1  | 1 |   |
|          |          |         |          |       |   |    |    |     |     |          | YMAERIT  | 1       | 1  | 1 |   |
| Rv0092,1 | 15607234 | PROBABI | 6699.621 | 19.71 | 1 | 20 | 20 | 127 | 761 | 78.80117 | 7.137207 | TmLLTGI | 18 | 1 | 1 |
|          |          |         |          |       |   |    |    |     |     |          | GTDVAIC  | 32      | 1  | 1 |   |
|          |          |         |          |       |   |    |    |     |     |          | tMLLTGD  | 1       | 1  | 1 |   |
|          |          |         |          |       |   |    |    |     |     |          | GHVVAm   | 3       | 1  | 1 |   |
|          |          |         |          |       |   |    |    |     |     |          | TMLLTGI  | 3       | 1  | 1 |   |
|          |          |         |          |       |   |    |    |     |     |          | AVDTVV   | 2       | 1  | 1 |   |
|          |          |         |          |       |   |    |    |     |     |          | DHLDVV   | 19      | 1  | 1 |   |
|          |          |         |          |       |   |    |    |     |     |          | VGIDEVL  | 2       | 1  | 1 |   |
|          |          |         |          |       |   |    |    |     |     |          | GTDVAIC  | 9       | 1  | 1 |   |
|          |          |         |          |       |   |    |    |     |     |          | ADLGmA   | 4       | 1  | 1 |   |
|          |          |         |          |       |   |    |    |     |     |          | VGIDEVL  | 1       | 1  | 1 |   |
|          |          |         |          |       |   |    |    |     |     |          | ADLGMA   | 1       | 1  | 1 |   |
|          |          |         |          |       |   |    |    |     |     |          | GHVVAM   | 1       | 1  | 1 |   |
|          |          |         |          |       |   |    |    |     |     |          | DAVAAL   | 16      | 1  | 1 |   |

|          |          |         |          |       |   |    |    |     |     |          |          |                     |    |   |   |
|----------|----------|---------|----------|-------|---|----|----|-----|-----|----------|----------|---------------------|----|---|---|
|          |          |         |          |       |   |    |    |     |     |          |          | AVDTVV              | 1  | 1 | 1 |
|          |          |         |          |       |   |    |    |     |     |          |          | GLRTmLI             | 1  | 1 | 1 |
|          |          |         |          |       |   |    |    |     |     |          |          | VGIDEVL             | 2  | 1 | 1 |
|          |          |         |          |       |   |    |    |     |     |          |          | VDVIEQL             | 1  | 1 | 1 |
|          |          |         |          |       |   |    |    |     |     |          |          | DRGHVV              | 2  | 1 | 1 |
|          |          |         |          |       |   |    |    |     |     |          |          | GVSGTVS             | 1  | 1 | 1 |
|          |          |         |          |       |   |    |    |     |     |          |          | DAVAAL              | 2  | 1 | 1 |
|          |          |         |          |       |   |    |    |     |     |          |          | ADLGmA              | 2  | 1 | 1 |
|          |          |         |          |       |   |    |    |     |     |          |          | gHVVA <sup>m</sup>  | 1  | 1 | 1 |
|          |          |         |          |       |   |    |    |     |     |          |          | DAVTDFI             | 1  | 1 | 1 |
|          |          |         |          |       |   |    |    |     |     |          |          | AIPGRGV             | 1  | 1 | 1 |
| Rv0176,5 | 15607317 | PROBABI | 1520.774 | 32.92 | 1 | 16 | 16 | 53  | 322 | 35.415   | 10.71143 | GPKLVVI             | 1  | 1 | 1 |
|          |          |         |          |       |   |    |    |     |     |          |          | LDDLAV <sup>1</sup> | 1  | 1 | 1 |
|          |          |         |          |       |   |    |    |     |     |          |          | yRPQLSIC            | 3  | 1 | 1 |
|          |          |         |          |       |   |    |    |     |     |          |          | NQYWVT              | 5  | 1 | 1 |
|          |          |         |          |       |   |    |    |     |     |          |          | ESGPVRN             | 4  | 1 | 1 |
|          |          |         |          |       |   |    |    |     |     |          |          | ESGPVRN             | 2  | 1 | 1 |
|          |          |         |          |       |   |    |    |     |     |          |          | LDDLAV <sup>1</sup> | 1  | 1 | 1 |
|          |          |         |          |       |   |    |    |     |     |          |          | ESGPVRN             | 2  | 1 | 1 |
|          |          |         |          |       |   |    |    |     |     |          |          | GQWRLD              | 2  | 1 | 1 |
|          |          |         |          |       |   |    |    |     |     |          |          | NQYWVT              | 2  | 1 | 1 |
|          |          |         |          |       |   |    |    |     |     |          |          | LVVDVL <sup>1</sup> | 2  | 1 | 1 |
|          |          |         |          |       |   |    |    |     |     |          |          | YRPQLSI             | 11 | 1 | 1 |
|          |          |         |          |       |   |    |    |     |     |          |          | GQWRLD              | 2  | 1 | 1 |
|          |          |         |          |       |   |    |    |     |     |          |          | NQYWVT              | 3  | 1 | 1 |
|          |          |         |          |       |   |    |    |     |     |          |          | NQYWVT              | 1  | 1 | 1 |
|          |          |         |          |       |   |    |    |     |     |          |          | LVVDVL <sup>1</sup> | 2  | 1 | 1 |
|          |          |         |          |       |   |    |    |     |     |          |          | ESGPVRN             | 1  | 1 | 1 |
|          |          |         |          |       |   |    |    |     |     |          |          | YRPQLSI             | 1  | 1 | 1 |
|          |          |         |          |       |   |    |    |     |     |          |          | NQYWVT              | 1  | 1 | 1 |
|          |          |         |          |       |   |    |    |     |     |          |          | YIQSTVR             | 1  | 1 | 1 |
|          |          |         |          |       |   |    |    |     |     |          |          | SLATDRY             | 2  | 1 | 1 |
|          |          |         |          |       |   |    |    |     |     |          |          | ARSLATI             | 1  | 1 | 1 |
|          |          |         |          |       |   |    |    |     |     |          |          | SLATDRY             | 1  | 1 | 1 |
|          |          |         |          |       |   |    |    |     |     |          |          | NQYWVT              | 1  | 1 | 1 |
| Rv0200,2 | 15607341 | POSSIBL | 6884.885 | 50.66 | 1 | 11 | 11 | 154 | 229 | 24.01379 | 9.056152 | DSREVVH             | 2  | 1 | 1 |

|                            |          |       |   |    |    |     |     |          |          |         |         |    |   |   |
|----------------------------|----------|-------|---|----|----|-----|-----|----------|----------|---------|---------|----|---|---|
|                            |          |       |   |    |    |     |     |          |          |         | RGVTAQ  | 23 | 1 | 1 |
|                            |          |       |   |    |    |     |     |          |          |         | EVVHLA  | 28 | 1 | 1 |
|                            |          |       |   |    |    |     |     |          |          |         | DSREVVH | 5  | 1 | 1 |
|                            |          |       |   |    |    |     |     |          |          |         | GVTAQA  | 13 | 1 | 1 |
|                            |          |       |   |    |    |     |     |          |          |         | GSGWL   | 16 | 1 | 1 |
|                            |          |       |   |    |    |     |     |          |          |         | EVVHLA  | 23 | 1 | 1 |
|                            |          |       |   |    |    |     |     |          |          |         | gSGWLVI | 4  | 1 | 1 |
|                            |          |       |   |    |    |     |     |          |          |         | DFNRDSF | 3  | 1 | 1 |
|                            |          |       |   |    |    |     |     |          |          |         | VSQSIPG | 14 | 1 | 1 |
|                            |          |       |   |    |    |     |     |          |          |         | gVTAQA  | 1  | 1 | 1 |
|                            |          |       |   |    |    |     |     |          |          |         | AAAMMV  | 1  | 1 | 1 |
|                            |          |       |   |    |    |     |     |          |          |         | AAAmMV  | 4  | 1 | 1 |
|                            |          |       |   |    |    |     |     |          |          |         | eVVHLA  | 4  | 1 | 1 |
|                            |          |       |   |    |    |     |     |          |          |         | eVVHLA  | 2  | 1 | 1 |
|                            |          |       |   |    |    |     |     |          |          |         | RSGWL   | 2  | 1 | 1 |
|                            |          |       |   |    |    |     |     |          |          |         | AAAmV   | 2  | 1 | 1 |
|                            |          |       |   |    |    |     |     |          |          |         | vSQSIPG | 3  | 1 | 1 |
|                            |          |       |   |    |    |     |     |          |          |         | VSQSIPG | 1  | 1 | 1 |
|                            |          |       |   |    |    |     |     |          |          |         | DFNRDSF | 2  | 1 | 1 |
|                            |          |       |   |    |    |     |     |          |          |         | ALRVTL  | 1  | 1 | 1 |
| Rv0206c, 15607347 POSSIBLE | 1535.897 | 12.29 | 1 | 13 | 13 | 43  | 944 | 100.8407 | 9.45166  | HVTQSGI | 2       | 1  | 1 |   |
|                            |          |       |   |    |    |     |     |          |          | HVTQSGI | 3       | 1  | 1 |   |
|                            |          |       |   |    |    |     |     |          |          | LAGLQP  | 2       | 1  | 1 |   |
|                            |          |       |   |    |    |     |     |          |          | FQQDHPI | 22      | 1  | 1 |   |
|                            |          |       |   |    |    |     |     |          |          | ASQATGI | 1       | 1  | 1 |   |
|                            |          |       |   |    |    |     |     |          |          | SGHIVAI | 2       | 1  | 1 |   |
|                            |          |       |   |    |    |     |     |          |          | VVDELNI | 1       | 1  | 1 |   |
|                            |          |       |   |    |    |     |     |          |          | DRSGHIV | 3       | 1  | 1 |   |
|                            |          |       |   |    |    |     |     |          |          | fQQDHPD | 1       | 1  | 1 |   |
|                            |          |       |   |    |    |     |     |          |          | VVDELNI | 1       | 1  | 1 |   |
|                            |          |       |   |    |    |     |     |          |          | AIAPDLQ | 2       | 1  | 1 |   |
|                            |          |       |   |    |    |     |     |          |          | IDGGTVK | 1       | 1  | 1 |   |
|                            |          |       |   |    |    |     |     |          |          | KVDELNI | 1       | 1  | 1 |   |
|                            |          |       |   |    |    |     |     |          |          | LAGLQP  | 1       | 1  | 1 |   |
| Rv0283,2 15607424 POSSIBLE | 6007.533 | 57.99 | 1 | 19 | 19 | 144 | 538 | 55.9082  | 7.283691 | MVQNTS  | 16      | 1  | 1 |   |
|                            |          |       |   |    |    |     |     |          |          | GGADGV  | 27      | 1  | 1 |   |

|          |          |         |          |       |   |    |    |     |     |          |          |          |    |   |   |
|----------|----------|---------|----------|-------|---|----|----|-----|-----|----------|----------|----------|----|---|---|
|          |          |         |          |       |   |    |    |     |     |          | YGIDNEP  | 2        | 1  | 1 |   |
|          |          |         |          |       |   |    |    |     |     |          | sPIDLADI | 4        | 1  | 1 |   |
|          |          |         |          |       |   |    |    |     |     |          | RSPIDLAI | 2        | 1  | 1 |   |
|          |          |         |          |       |   |    |    |     |     |          | mVQNTS'  | 7        | 1  | 1 |   |
|          |          |         |          |       |   |    |    |     |     |          | SPIDLADI | 16       | 1  | 1 |   |
|          |          |         |          |       |   |    |    |     |     |          | YPSEPVS  | 2        | 1  | 1 |   |
|          |          |         |          |       |   |    |    |     |     |          | GNLIGIPC | 7        | 1  | 1 |   |
|          |          |         |          |       |   |    |    |     |     |          | VALAAG'  | 20       | 1  | 1 |   |
|          |          |         |          |       |   |    |    |     |     |          | VGEQLHI  | 6        | 1  | 1 |   |
|          |          |         |          |       |   |    |    |     |     |          | STAALYN  | 5        | 1  | 1 |   |
|          |          |         |          |       |   |    |    |     |     |          | gGADGV(  | 3        | 1  | 1 |   |
|          |          |         |          |       |   |    |    |     |     |          | LGADEV/  | 4        | 1  | 1 |   |
|          |          |         |          |       |   |    |    |     |     |          | vGEQLHP  | 1        | 1  | 1 |   |
|          |          |         |          |       |   |    |    |     |     |          | RYPSEPV  | 2        | 1  | 1 |   |
|          |          |         |          |       |   |    |    |     |     |          | AAALGPC  | 4        | 1  | 1 |   |
|          |          |         |          |       |   |    |    |     |     |          | nNNSYGI  | 1        | 1  | 1 |   |
|          |          |         |          |       |   |    |    |     |     |          | NNNSYGI  | 2        | 1  | 1 |   |
|          |          |         |          |       |   |    |    |     |     |          | gNLIGIPG | 2        | 1  | 1 |   |
|          |          |         |          |       |   |    |    |     |     |          | LIVGRPV  | 1        | 1  | 1 |   |
|          |          |         |          |       |   |    |    |     |     |          | aDALLAF  | 2        | 1  | 1 |   |
|          |          |         |          |       |   |    |    |     |     |          | AAALGPC  | 1        | 1  | 1 |   |
|          |          |         |          |       |   |    |    |     |     |          | STELDQF  | 1        | 1  | 1 |   |
|          |          |         |          |       |   |    |    |     |     |          | ADALLAI  | 4        | 1  | 1 |   |
|          |          |         |          |       |   |    |    |     |     |          | IIASGLFN | 2        | 1  | 1 |   |
| Rv0312,9 | 15607453 | CONSER\ | 5567.151 | 18.87 | 1 | 12 | 12 | 148 | 620 | 64.10392 | 5.262207 | TSIGLAT, | 14 | 1 | 1 |
|          |          |         |          |       |   |    |    |     |     |          |          | TSIGLAT, | 23 | 1 | 1 |
|          |          |         |          |       |   |    |    |     |     |          |          | ELAWSQ'  | 12 | 1 | 1 |
|          |          |         |          |       |   |    |    |     |     |          |          | FEGDSYN  | 17 | 1 | 1 |
|          |          |         |          |       |   |    |    |     |     |          |          | TRTSIGL/ | 11 | 1 | 1 |
|          |          |         |          |       |   |    |    |     |     |          |          | rPVLTA(  | 4  | 1 | 1 |
|          |          |         |          |       |   |    |    |     |     |          |          | FEGDSYN  | 6  | 1 | 1 |
|          |          |         |          |       |   |    |    |     |     |          |          | TRTSIGL/ | 3  | 1 | 1 |
|          |          |         |          |       |   |    |    |     |     |          |          | RPVLTAS  | 20 | 1 | 1 |
|          |          |         |          |       |   |    |    |     |     |          |          | RPVLTAS  | 17 | 1 | 1 |
|          |          |         |          |       |   |    |    |     |     |          |          | ELAWSQ'  | 3  | 1 | 1 |
|          |          |         |          |       |   |    |    |     |     |          |          | ELAWSQ'  | 1  | 1 | 1 |



|          |          |         |          |       |   |    |    |    |     |          |          |         |    |   |   |
|----------|----------|---------|----------|-------|---|----|----|----|-----|----------|----------|---------|----|---|---|
|          |          |         |          |       |   |    |    |    |     |          | RPVLTAS  | 2       | 1  | 1 |   |
|          |          |         |          |       |   |    |    |    |     |          | RPVLTAS  | 1       | 1  | 1 |   |
|          |          |         |          |       |   |    |    |    |     |          | RPVLTAS  | 1       | 1  | 1 |   |
|          |          |         |          |       |   |    |    |    |     |          | LNAVEPF  | 3       | 1  | 1 |   |
|          |          |         |          |       |   |    |    |    |     |          | fEGDSYN  | 1       | 1  | 1 |   |
|          |          |         |          |       |   |    |    |    |     |          | LNAVEPF  | 1       | 1  | 1 |   |
|          |          |         |          |       |   |    |    |    |     |          | LSFHTR   | 2       | 1  | 1 |   |
|          |          |         |          |       |   |    |    |    |     |          | LSFHTRR  | 3       | 1  | 1 |   |
|          |          |         |          |       |   |    |    |    |     |          | ISFHTR   | 1       | 1  | 1 |   |
|          |          |         |          |       |   |    |    |    |     |          | LSFHTRR  | 1       | 1  | 1 |   |
|          |          |         |          |       |   |    |    |    |     |          | eLAWSQ1  | 1       | 1  | 1 |   |
| Rv0338c, | 15607479 | PROBABI | 3152.096 | 29.71 | 1 | 19 | 19 | 71 | 882 | 95.42499 | 7.312988 | ELIGAAG | 16 | 1 | 1 |
|          |          |         |          |       |   |    |    |    |     |          | VDEALA7  | 4       | 1  | 1 |   |
|          |          |         |          |       |   |    |    |    |     |          | INHERVD  | 6       | 1  | 1 |   |
|          |          |         |          |       |   |    |    |    |     |          | eLIGAAG  | 1       | 1  | 1 |   |
|          |          |         |          |       |   |    |    |    |     |          | GmLDFA7  | 1       | 1  | 1 |   |
|          |          |         |          |       |   |    |    |    |     |          | YQVMME   | 1       | 1  | 1 |   |
|          |          |         |          |       |   |    |    |    |     |          | ELIGAAG  | 12      | 1  | 1 |   |
|          |          |         |          |       |   |    |    |    |     |          | LVPVTPV  | 1       | 1  | 1 |   |
|          |          |         |          |       |   |    |    |    |     |          | GNPWGQ   | 1       | 1  | 1 |   |
|          |          |         |          |       |   |    |    |    |     |          | RSGNEFL  | 1       | 1  | 1 |   |
|          |          |         |          |       |   |    |    |    |     |          | VMVTDG   | 2       | 1  | 1 |   |
|          |          |         |          |       |   |    |    |    |     |          | DASAGGI  | 2       | 1  | 1 |   |
|          |          |         |          |       |   |    |    |    |     |          | SFccGAGC | 1       | 1  | 1 |   |
|          |          |         |          |       |   |    |    |    |     |          | VMVTDG   | 3       | 1  | 1 |   |
|          |          |         |          |       |   |    |    |    |     |          | AVAELLA  | 1       | 1  | 1 |   |
|          |          |         |          |       |   |    |    |    |     |          | LPDGLGF  | 1       | 1  | 1 |   |
|          |          |         |          |       |   |    |    |    |     |          | VmVTDG   | 4       | 1  | 1 |   |
|          |          |         |          |       |   |    |    |    |     |          | VmVTDG   | 1       | 1  | 1 |   |
|          |          |         |          |       |   |    |    |    |     |          | MWmEEF   | 1       | 1  | 1 |   |
|          |          |         |          |       |   |    |    |    |     |          | MWmEEF   | 2       | 1  | 1 |   |
|          |          |         |          |       |   |    |    |    |     |          | sFccGAGC | 1       | 1  | 1 |   |
|          |          |         |          |       |   |    |    |    |     |          | LVIMDLR  | 1       | 1  | 1 |   |
|          |          |         |          |       |   |    |    |    |     |          | mWmEEF   | 1       | 1  | 1 |   |
|          |          |         |          |       |   |    |    |    |     |          | ELIGAAG  | 1       | 1  | 1 |   |
|          |          |         |          |       |   |    |    |    |     |          | qLGANY1  | 1       | 1  | 1 |   |

|          |                  |          |       |   |    |    |     |     |          |          |          |    |   |   |
|----------|------------------|----------|-------|---|----|----|-----|-----|----------|----------|----------|----|---|---|
|          |                  |          |       |   |    |    |     |     |          |          | vMVTDG'  | 1  | 1 | 1 |
|          |                  |          |       |   |    |    |     |     |          |          | LVImDLR  | 1  | 1 | 1 |
|          |                  |          |       |   |    |    |     |     |          |          | mWmEEH   | 1  | 1 | 1 |
|          |                  |          |       |   |    |    |     |     |          |          | IPDGLGPI | 1  | 1 | 1 |
| Rv0362,1 | 15607503 POSSIBL | 2814.258 | 51.52 | 1 | 17 | 17 | 85  | 460 | 49.28639 | 5.008301 | LLGIIAEI | 14 | 1 | 1 |
|          |                  |          |       |   |    |    |     |     |          |          | AVDLWL   | 1  | 1 | 1 |
|          |                  |          |       |   |    |    |     |     |          |          | LLGIIAEI | 1  | 1 | 1 |
|          |                  |          |       |   |    |    |     |     |          |          | TTAYVY'  | 11 | 1 | 1 |
|          |                  |          |       |   |    |    |     |     |          |          | QGGSAPI  | 6  | 1 | 1 |
|          |                  |          |       |   |    |    |     |     |          |          | VRELMG   | 2  | 1 | 1 |
|          |                  |          |       |   |    |    |     |     |          |          | EALLTLL  | 11 | 1 | 1 |
|          |                  |          |       |   |    |    |     |     |          |          | GLLSWPE  | 2  | 1 | 1 |
|          |                  |          |       |   |    |    |     |     |          |          | aLVLANP  | 3  | 1 | 1 |
|          |                  |          |       |   |    |    |     |     |          |          | ALVLANI  | 8  | 1 | 1 |
|          |                  |          |       |   |    |    |     |     |          |          | ELAAQTI  | 1  | 1 | 1 |
|          |                  |          |       |   |    |    |     |     |          |          | GLLSWPE  | 1  | 1 | 1 |
|          |                  |          |       |   |    |    |     |     |          |          | ASPWLLV  | 6  | 1 | 1 |
|          |                  |          |       |   |    |    |     |     |          |          | HVIGIGTI | 1  | 1 | 1 |
|          |                  |          |       |   |    |    |     |     |          |          | eALLTLL  | 3  | 1 | 1 |
|          |                  |          |       |   |    |    |     |     |          |          | LAAEALF  | 1  | 1 | 1 |
|          |                  |          |       |   |    |    |     |     |          |          | REALLTL  | 2  | 1 | 1 |
|          |                  |          |       |   |    |    |     |     |          |          | SIRPAEN  | 2  | 1 | 1 |
|          |                  |          |       |   |    |    |     |     |          |          | qGGSAPL  | 2  | 1 | 1 |
|          |                  |          |       |   |    |    |     |     |          |          | EALLTLL  | 2  | 1 | 1 |
|          |                  |          |       |   |    |    |     |     |          |          | ELAAQTI  | 1  | 1 | 1 |
|          |                  |          |       |   |    |    |     |     |          |          | gLLSWPE  | 1  | 1 | 1 |
|          |                  |          |       |   |    |    |     |     |          |          | GLLSWPE  | 1  | 1 | 1 |
|          |                  |          |       |   |    |    |     |     |          |          | ELMGDD   | 1  | 1 | 1 |
|          |                  |          |       |   |    |    |     |     |          |          | ELMGDD   | 1  | 1 | 1 |
| Rv0412c, | 15607553 POSSIBL | 9490.802 | 30.98 | 1 | 13 | 13 | 199 | 439 | 47.08688 | 9.715332 | AGNPVG   | 1  | 1 | 1 |
|          |                  |          |       |   |    |    |     |     |          |          | iNAELAV  | 2  | 1 | 1 |
|          |                  |          |       |   |    |    |     |     |          |          | INAELAV  | 23 | 1 | 1 |
|          |                  |          |       |   |    |    |     |     |          |          | YEQAITD  | 25 | 1 | 1 |
|          |                  |          |       |   |    |    |     |     |          |          | ASSGLTE  | 18 | 1 | 1 |
|          |                  |          |       |   |    |    |     |     |          |          | AGNPVG   | 12 | 1 | 1 |
|          |                  |          |       |   |    |    |     |     |          |          | AGNPVG   | 17 | 1 | 1 |

|          |          |         |          |       |   |    |    |     |     |          |          |          |    |   |   |
|----------|----------|---------|----------|-------|---|----|----|-----|-----|----------|----------|----------|----|---|---|
|          |          |         |          |       |   |    |    |     |     |          |          | QQVLTA'  | 16 | 1 | 1 |
|          |          |         |          |       |   |    |    |     |     |          |          | qQVLTA'  | 2  | 1 | 1 |
|          |          |         |          |       |   |    |    |     |     |          |          | LYTTLSV  | 23 | 1 | 1 |
|          |          |         |          |       |   |    |    |     |     |          |          | LRYEQAI  | 41 | 1 | 1 |
|          |          |         |          |       |   |    |    |     |     |          |          | aGNPVGS  | 2  | 1 | 1 |
|          |          |         |          |       |   |    |    |     |     |          |          | IRYEQAII | 2  | 1 | 1 |
|          |          |         |          |       |   |    |    |     |     |          |          | LRYEQAI  | 1  | 1 | 1 |
|          |          |         |          |       |   |    |    |     |     |          |          | INAELAV  | 1  | 1 | 1 |
|          |          |         |          |       |   |    |    |     |     |          |          | ANNRAG   | 1  | 1 | 1 |
|          |          |         |          |       |   |    |    |     |     |          |          | aSSGLTD  | 3  | 1 | 1 |
|          |          |         |          |       |   |    |    |     |     |          |          | yEQAITD  | 1  | 1 | 1 |
|          |          |         |          |       |   |    |    |     |     |          |          | LYQATS'  | 3  | 1 | 1 |
|          |          |         |          |       |   |    |    |     |     |          |          | aGNPVGS  | 2  | 1 | 1 |
|          |          |         |          |       |   |    |    |     |     |          |          | ANNRAG   | 1  | 1 | 1 |
|          |          |         |          |       |   |    |    |     |     |          |          | LYQATS'  | 2  | 1 | 1 |
| Rv0431,1 | 15607572 | PUTATIV | 3134.614 | 23.17 | 1 | 6  | 6  | 56  | 164 | 16.92676 | 4.678223 | VYNISGT  | 34 | 1 | 1 |
|          |          |         |          |       |   |    |    |     |     |          |          | ATADAV   | 3  | 1 | 1 |
|          |          |         |          |       |   |    |    |     |     |          |          | vYNISGTI | 2  | 1 | 1 |
|          |          |         |          |       |   |    |    |     |     |          |          | AEVRVYI  | 7  | 1 | 1 |
|          |          |         |          |       |   |    |    |     |     |          |          | TLGAAVI  | 6  | 1 | 1 |
|          |          |         |          |       |   |    |    |     |     |          |          | ATADAV   | 1  | 1 | 1 |
|          |          |         |          |       |   |    |    |     |     |          |          | VYNISGT  | 3  | 1 | 1 |
| Rv0497,1 | 15607638 | PROBABI | 8057.695 | 63.55 | 1 | 18 | 18 | 136 | 310 | 33.07205 | 5.528809 | HAAAAA   | 69 | 1 | 1 |
|          |          |         |          |       |   |    |    |     |     |          |          | RGDSDAI  | 4  | 1 | 1 |
|          |          |         |          |       |   |    |    |     |     |          |          | VQVGEA   | 2  | 1 | 1 |
|          |          |         |          |       |   |    |    |     |     |          |          | RRGDSD'  | 3  | 1 | 1 |
|          |          |         |          |       |   |    |    |     |     |          |          | QISVAEL  | 12 | 1 | 1 |
|          |          |         |          |       |   |    |    |     |     |          |          | GSDAIT   | 2  | 1 | 1 |
|          |          |         |          |       |   |    |    |     |     |          |          | VQVGEA   | 9  | 1 | 1 |
|          |          |         |          |       |   |    |    |     |     |          |          | QISVAEL  | 1  | 1 | 1 |
|          |          |         |          |       |   |    |    |     |     |          |          | HAAAAA   | 1  | 1 | 1 |
|          |          |         |          |       |   |    |    |     |     |          |          | vQVGEA'  | 2  | 1 | 1 |
|          |          |         |          |       |   |    |    |     |     |          |          | qISVAELI | 1  | 1 | 1 |
|          |          |         |          |       |   |    |    |     |     |          |          | MTGPHPI  | 1  | 1 | 1 |
|          |          |         |          |       |   |    |    |     |     |          |          | APAGPPS  | 2  | 1 | 1 |
|          |          |         |          |       |   |    |    |     |     |          |          | APAGPPS  | 4  | 1 | 1 |

|                   |         |          |       |   |    |    |    |     |          |          |          |    |   |   |
|-------------------|---------|----------|-------|---|----|----|----|-----|----------|----------|----------|----|---|---|
|                   |         |          |       |   |    |    |    |     |          |          | TVYWSQ   | 9  | 1 | 1 |
|                   |         |          |       |   |    |    |    |     |          |          | tVYWSQF  | 1  | 1 | 1 |
|                   |         |          |       |   |    |    |    |     |          |          | ESGPELSI | 4  | 1 | 1 |
|                   |         |          |       |   |    |    |    |     |          |          | eSGPELSI | 3  | 1 | 1 |
|                   |         |          |       |   |    |    |    |     |          |          | QGVGTGA  | 1  | 1 | 1 |
|                   |         |          |       |   |    |    |    |     |          |          | qGVGTGAI | 1  | 1 | 1 |
|                   |         |          |       |   |    |    |    |     |          |          | RESGPEL  | 2  | 1 | 1 |
|                   |         |          |       |   |    |    |    |     |          |          | SPPQDRR  | 1  | 1 | 1 |
|                   |         |          |       |   |    |    |    |     |          |          | gDSDAIT  | 1  | 1 | 1 |
| Rv0676c, 15607816 | PROBABI | 1304.291 | 14.52 | 1 | 10 | 10 | 27 | 964 | 104.7172 | 6.036621 | mLEQVNI  | 2  | 1 | 1 |
|                   |         |          |       |   |    |    |    |     |          |          | MLEQVN   | 1  | 1 | 1 |
|                   |         |          |       |   |    |    |    |     |          |          | MNPEVLr  | 3  | 1 | 1 |
|                   |         |          |       |   |    |    |    |     |          |          | mLEQVNI  | 1  | 1 | 1 |
|                   |         |          |       |   |    |    |    |     |          |          | NYLPADI  | 2  | 1 | 1 |
|                   |         |          |       |   |    |    |    |     |          |          | mNPEVLr  | 2  | 1 | 1 |
|                   |         |          |       |   |    |    |    |     |          |          | MNPEVLI  | 1  | 1 | 1 |
|                   |         |          |       |   |    |    |    |     |          |          | FIISHEGD | 2  | 1 | 1 |
|                   |         |          |       |   |    |    |    |     |          |          | GLEQFLS  | 2  | 1 | 1 |
|                   |         |          |       |   |    |    |    |     |          |          | FIISHEGD | 2  | 1 | 1 |
|                   |         |          |       |   |    |    |    |     |          |          | TNYNDRI  | 1  | 1 | 1 |
|                   |         |          |       |   |    |    |    |     |          |          | mNPEVLr  | 2  | 1 | 1 |
|                   |         |          |       |   |    |    |    |     |          |          | NSADFLV  | 1  | 1 | 1 |
|                   |         |          |       |   |    |    |    |     |          |          | AIFAVEG  | 1  | 1 | 1 |
|                   |         |          |       |   |    |    |    |     |          |          | NHIADFD  | 2  | 1 | 1 |
| Rv0686,2 15607826 | PROBABI | 2426.192 | 51.7  | 1 | 13 | 13 | 47 | 265 | 28.55741 | 8.631348 | SGVLALA  | 17 | 1 | 1 |
|                   |         |          |       |   |    |    |    |     |          |          | QAPAAEI  | 7  | 1 | 1 |
|                   |         |          |       |   |    |    |    |     |          |          | sGVLALA  | 2  | 1 | 1 |
|                   |         |          |       |   |    |    |    |     |          |          | LVVLVNI  | 1  | 1 | 1 |
|                   |         |          |       |   |    |    |    |     |          |          | VHLHISG  | 3  | 1 | 1 |
|                   |         |          |       |   |    |    |    |     |          |          | AAERQAI  | 1  | 1 | 1 |
|                   |         |          |       |   |    |    |    |     |          |          | ASGAVN.  | 1  | 1 | 1 |
|                   |         |          |       |   |    |    |    |     |          |          | ASGAVN.  | 2  | 1 | 1 |
|                   |         |          |       |   |    |    |    |     |          |          | VIASVTR  | 2  | 1 | 1 |
|                   |         |          |       |   |    |    |    |     |          |          | qAPAAEP  | 2  | 1 | 1 |
|                   |         |          |       |   |    |    |    |     |          |          | LAELESL  | 3  | 1 | 1 |
|                   |         |          |       |   |    |    |    |     |          |          | AQIISEI  | 1  | 1 | 1 |

|                   |          |          |       |   |    |    |     |     |          |          |          |    |   |   |
|-------------------|----------|----------|-------|---|----|----|-----|-----|----------|----------|----------|----|---|---|
|                   |          |          |       |   |    |    |     |     |          |          | qVQAV'   | 1  | 1 | 1 |
|                   |          |          |       |   |    |    |     |     |          |          | mVDIRSN  | 1  | 1 | 1 |
|                   |          |          |       |   |    |    |     |     |          |          | MVDIRSN  | 2  | 1 | 1 |
|                   |          |          |       |   |    |    |     |     |          |          | RAQIISEI | 1  | 1 | 1 |
| Rv0816c, 15607956 | PROBABI  | 5930.59  | 77.14 | 1 | 17 | 17 | 161 | 140 | 14.74884 | 9.26123  | GVGDVc/  | 18 | 1 | 1 |
|                   |          |          |       |   |    |    |     |     |          |          | TAELGLS  | 23 | 1 | 1 |
|                   |          |          |       |   |    |    |     |     |          |          | tAELGLS  | 3  | 1 | 1 |
|                   |          |          |       |   |    |    |     |     |          |          | RGVGDV   | 12 | 1 | 1 |
|                   |          |          |       |   |    |    |     |     |          |          | FSVLSLP' | 9  | 1 | 1 |
|                   |          |          |       |   |    |    |     |     |          |          | RGVGDV   | 22 | 1 | 1 |
|                   |          |          |       |   |    |    |     |     |          |          | RFSVLSL  | 15 | 1 | 1 |
|                   |          |          |       |   |    |    |     |     |          |          | GVGDVc/  | 6  | 1 | 1 |
|                   |          |          |       |   |    |    |     |     |          |          | RFSVLSL  | 18 | 1 | 1 |
|                   |          |          |       |   |    |    |     |     |          |          | TAELGLS  | 3  | 1 | 1 |
|                   |          |          |       |   |    |    |     |     |          |          | TSGVPKA  | 2  | 1 | 1 |
|                   |          |          |       |   |    |    |     |     |          |          | EVGPEIT  | 8  | 1 | 1 |
|                   |          |          |       |   |    |    |     |     |          |          | FSVLSLP' | 13 | 1 | 1 |
|                   |          |          |       |   |    |    |     |     |          |          | SALKPLL  | 1  | 1 | 1 |
|                   |          |          |       |   |    |    |     |     |          |          | APGcAPcl | 2  | 1 | 1 |
|                   |          |          |       |   |    |    |     |     |          |          | APGcAPcl | 1  | 1 | 1 |
|                   |          |          |       |   |    |    |     |     |          |          | EVGPEIT  | 2  | 1 | 1 |
|                   |          |          |       |   |    |    |     |     |          |          | TAELGLS  | 2  | 1 | 1 |
|                   |          |          |       |   |    |    |     |     |          |          | eVGPEIT  | 1  | 1 | 1 |
| Rv0901,9 15608041 | POSSIBLE | 280.1628 | 37.71 | 1 | 4  | 4  | 8   | 175 | 18.89778 | 9.656738 | AGADGS   | 1  | 1 | 1 |
|                   |          |          |       |   |    |    |     |     |          |          | IPVVPYA  | 4  | 1 | 1 |
|                   |          |          |       |   |    |    |     |     |          |          | VATESA/  | 2  | 1 | 1 |
|                   |          |          |       |   |    |    |     |     |          |          | AFFTPWF  | 1  | 1 | 1 |
| Rv0969,1 15608109 | PROBABI  | 183.8737 | 7.92  | 1 | 5  | 5  | 6   | 770 | 80.05293 | 9.085449 | AVAIEET  | 2  | 1 | 1 |
|                   |          |          |       |   |    |    |     |     |          |          | VcVTGFN  | 1  | 1 | 1 |
|                   |          |          |       |   |    |    |     |     |          |          | GPVRGS/  | 1  | 1 | 1 |
|                   |          |          |       |   |    |    |     |     |          |          | AQHVPAL  | 1  | 1 | 1 |
|                   |          |          |       |   |    |    |     |     |          |          | GSASWPC  | 1  | 1 | 1 |
| Rv0982,5 15608122 | PROBABI  | 5468.313 | 51.39 | 1 | 29 | 29 | 146 | 504 | 54.37377 | 9.671387 | RRNDILF  | 2  | 1 | 1 |
|                   |          |          |       |   |    |    |     |     |          |          | TNVELLn  | 4  | 1 | 1 |
|                   |          |          |       |   |    |    |     |     |          |          | LSQLDAS  | 23 | 1 | 1 |
|                   |          |          |       |   |    |    |     |     |          |          | IEDTDPG  | 8  | 1 | 1 |

|          |          |          |          |       |   |   |   |    |     |          |          |          |    |   |   |
|----------|----------|----------|----------|-------|---|---|---|----|-----|----------|----------|----------|----|---|---|
|          |          |          |          |       |   |   |   |    |     |          |          | NDILFDV  | 2  | 1 | 1 |
|          |          |          |          |       |   |   |   |    |     |          |          | TNVELLM  | 7  | 1 | 1 |
|          |          |          |          |       |   |   |   |    |     |          |          | GSANVIS  | 3  | 1 | 1 |
|          |          |          |          |       |   |   |   |    |     |          |          | LSQLDAS  | 11 | 1 | 1 |
|          |          |          |          |       |   |   |   |    |     |          |          | RNDILFD  | 1  | 1 | 1 |
|          |          |          |          |       |   |   |   |    |     |          |          | GDAGEV   | 7  | 1 | 1 |
|          |          |          |          |       |   |   |   |    |     |          |          | LTEAFNL  | 15 | 1 | 1 |
|          |          |          |          |       |   |   |   |    |     |          |          | TDDLRPi  | 11 | 1 | 1 |
|          |          |          |          |       |   |   |   |    |     |          |          | GDAGEV   | 5  | 1 | 1 |
|          |          |          |          |       |   |   |   |    |     |          |          | LVTDAGI  | 4  | 1 | 1 |
|          |          |          |          |       |   |   |   |    |     |          |          | TNVELLn  | 5  | 1 | 1 |
|          |          |          |          |       |   |   |   |    |     |          |          | STDIENSI | 2  | 1 | 1 |
|          |          |          |          |       |   |   |   |    |     |          |          | WSPPGGI  | 2  | 1 | 1 |
|          |          |          |          |       |   |   |   |    |     |          |          | LTEAFNL  | 6  | 1 | 1 |
|          |          |          |          |       |   |   |   |    |     |          |          | ALPGSGL  | 1  | 1 | 1 |
|          |          |          |          |       |   |   |   |    |     |          |          | ALPGSGL  | 1  | 1 | 1 |
|          |          |          |          |       |   |   |   |    |     |          |          | RmPIPQLI | 1  | 1 | 1 |
|          |          |          |          |       |   |   |   |    |     |          |          | IEDTDPG  | 4  | 1 | 1 |
|          |          |          |          |       |   |   |   |    |     |          |          | QARLVTI  | 2  | 1 | 1 |
|          |          |          |          |       |   |   |   |    |     |          |          | MALNLm   | 1  | 1 | 1 |
|          |          |          |          |       |   |   |   |    |     |          |          | RMPIPQL  | 2  | 1 | 1 |
|          |          |          |          |       |   |   |   |    |     |          |          | tDDLRRIP | 1  | 1 | 1 |
|          |          |          |          |       |   |   |   |    |     |          |          | GSANVIS  | 1  | 1 | 1 |
|          |          |          |          |       |   |   |   |    |     |          |          | MPIPQLPc | 3  | 1 | 1 |
|          |          |          |          |       |   |   |   |    |     |          |          | LTEAAER  | 1  | 1 | 1 |
|          |          |          |          |       |   |   |   |    |     |          |          | VARTDDI  | 1  | 1 | 1 |
|          |          |          |          |       |   |   |   |    |     |          |          | TPLTSLR  | 2  | 1 | 1 |
|          |          |          |          |       |   |   |   |    |     |          |          | LPKQEm\  | 2  | 1 | 1 |
|          |          |          |          |       |   |   |   |    |     |          |          | QVVLNHc  | 1  | 1 | 1 |
|          |          |          |          |       |   |   |   |    |     |          |          | mPIPQLPc | 2  | 1 | 1 |
|          |          |          |          |       |   |   |   |    |     |          |          | GPGIPVQ  | 1  | 1 | 1 |
|          |          |          |          |       |   |   |   |    |     |          |          | LVTDAGI  | 1  | 1 | 1 |
| Rv1115,9 | 15608255 | POSSIBLE | 718.5099 | 42.67 | 1 | 7 | 7 | 17 | 232 | 24.06704 | 5.998535 | FNTGNEE  | 5  | 1 | 1 |
|          |          |          |          |       |   |   |   |    |     |          |          | VGGGGA   | 4  | 1 | 1 |
|          |          |          |          |       |   |   |   |    |     |          |          | GFSTSLL  | 2  | 1 | 1 |
|          |          |          |          |       |   |   |   |    |     |          |          | TmPGALS  | 2  | 1 | 1 |

|           |          |            |          |       |   |    |    |    |     |          |          |          |   |   |   |
|-----------|----------|------------|----------|-------|---|----|----|----|-----|----------|----------|----------|---|---|---|
|           |          |            |          |       |   |    |    |    |     |          | GFSTSLL  | 1        | 1 | 1 |   |
|           |          |            |          |       |   |    |    |    |     |          | GFQQGT   | 2        | 1 | 1 |   |
|           |          |            |          |       |   |    |    |    |     |          | LRTmPG   | 1        | 1 | 1 |   |
| Rv1132,1  | 15608272 | hypothetic | 2556.089 | 26.04 | 1 | 16 | 16 | 81 | 576 | 63.97779 | 8.880371 | GIVAIASr | 4 | 1 | 1 |
|           |          |            |          |       |   |    |    |    |     |          | VVLLDA   | 8        | 1 | 1 |   |
|           |          |            |          |       |   |    |    |    |     |          | LVDAAT   | 4        | 1 | 1 |   |
|           |          |            |          |       |   |    |    |    |     |          | AmAGHD   | 8        | 1 | 1 |   |
|           |          |            |          |       |   |    |    |    |     |          | GIVAIASl | 3        | 1 | 1 |   |
|           |          |            |          |       |   |    |    |    |     |          | AMAGHD   | 6        | 1 | 1 |   |
|           |          |            |          |       |   |    |    |    |     |          | AQIPMYL  | 5        | 1 | 1 |   |
|           |          |            |          |       |   |    |    |    |     |          | VcSTAVC  | 2        | 1 | 1 |   |
|           |          |            |          |       |   |    |    |    |     |          | ISFLAAM  | 1        | 1 | 1 |   |
|           |          |            |          |       |   |    |    |    |     |          | cGFQPGE  | 3        | 1 | 1 |   |
|           |          |            |          |       |   |    |    |    |     |          | KISFLAAi | 2        | 1 | 1 |   |
|           |          |            |          |       |   |    |    |    |     |          | VcSTAVC  | 3        | 1 | 1 |   |
|           |          |            |          |       |   |    |    |    |     |          | ALFTLAF  | 5        | 1 | 1 |   |
|           |          |            |          |       |   |    |    |    |     |          | cGFQPGE  | 2        | 1 | 1 |   |
|           |          |            |          |       |   |    |    |    |     |          | AQIPmYL  | 4        | 1 | 1 |   |
|           |          |            |          |       |   |    |    |    |     |          | VADmVN   | 3        | 1 | 1 |   |
|           |          |            |          |       |   |    |    |    |     |          | QTQEYRI  | 6        | 1 | 1 |   |
|           |          |            |          |       |   |    |    |    |     |          | AMAGHD   | 1        | 1 | 1 |   |
|           |          |            |          |       |   |    |    |    |     |          | LVDAAT   | 2        | 1 | 1 |   |
|           |          |            |          |       |   |    |    |    |     |          | AmAGHD   | 1        | 1 | 1 |   |
|           |          |            |          |       |   |    |    |    |     |          | vVLLDA   | 1        | 1 | 1 |   |
|           |          |            |          |       |   |    |    |    |     |          | VADMVN   | 5        | 1 | 1 |   |
|           |          |            |          |       |   |    |    |    |     |          | QTQEYRI  | 2        | 1 | 1 |   |
| Rv1318c,1 | 15608458 | POSSIBLE   | 2462.09  | 22.18 | 1 | 11 | 11 | 55 | 541 | 59.29426 | 10.65283 | LLASAQA  | 1 | 1 | 1 |
|           |          |            |          |       |   |    |    |    |     |          | TNLVVEI  | 12       | 1 | 1 |   |
|           |          |            |          |       |   |    |    |    |     |          | LVNEMPI  | 3        | 1 | 1 |   |
|           |          |            |          |       |   |    |    |    |     |          | AIADRLV  | 2        | 1 | 1 |   |
|           |          |            |          |       |   |    |    |    |     |          | LVNEmPE  | 9        | 1 | 1 |   |
|           |          |            |          |       |   |    |    |    |     |          | GFNAmV   | 4        | 1 | 1 |   |
|           |          |            |          |       |   |    |    |    |     |          | gFNAmV   | 2        | 1 | 1 |   |
|           |          |            |          |       |   |    |    |    |     |          | AIADRLV  | 3        | 1 | 1 |   |
|           |          |            |          |       |   |    |    |    |     |          | ERFEYTV  | 6        | 1 | 1 |   |
|           |          |            |          |       |   |    |    |    |     |          | GFNAMV   | 2        | 1 | 1 |   |

|                                |          |       |   |    |    |     |     |          |          |  |          |    |   |   |
|--------------------------------|----------|-------|---|----|----|-----|-----|----------|----------|--|----------|----|---|---|
|                                |          |       |   |    |    |     |     |          |          |  | HVGREV.  | 3  | 1 | 1 |
|                                |          |       |   |    |    |     |     |          |          |  | FEYTVIG  | 3  | 1 | 1 |
|                                |          |       |   |    |    |     |     |          |          |  | LLASAQA  | 1  | 1 | 1 |
|                                |          |       |   |    |    |     |     |          |          |  | HVGREV.  | 3  | 1 | 1 |
|                                |          |       |   |    |    |     |     |          |          |  | LPcPEDK. | 1  | 1 | 1 |
| Rv1565c, 15608703 hypothetical | 1439.073 | 17.42 | 1 | 16 | 16 | 51  | 729 | 80.1112  | 9.437012 |  | TIALAGG  | 7  | 1 | 1 |
|                                |          |       |   |    |    |     |     |          |          |  | AAGKEL   | 4  | 1 | 1 |
|                                |          |       |   |    |    |     |     |          |          |  | AVEGNV   | 5  | 1 | 1 |
|                                |          |       |   |    |    |     |     |          |          |  | NPTLDFV  | 4  | 1 | 1 |
|                                |          |       |   |    |    |     |     |          |          |  | TDTcRAV  | 2  | 1 | 1 |
|                                |          |       |   |    |    |     |     |          |          |  | AVEGNV   | 4  | 1 | 1 |
|                                |          |       |   |    |    |     |     |          |          |  | AVEGNV   | 2  | 1 | 1 |
|                                |          |       |   |    |    |     |     |          |          |  | FPLLKPL  | 1  | 1 | 1 |
|                                |          |       |   |    |    |     |     |          |          |  | VLVDRN   | 3  | 1 | 1 |
|                                |          |       |   |    |    |     |     |          |          |  | TMTSELC  | 2  | 1 | 1 |
|                                |          |       |   |    |    |     |     |          |          |  | QIAANTE  | 2  | 1 | 1 |
|                                |          |       |   |    |    |     |     |          |          |  | MRPTVLI  | 1  | 1 | 1 |
|                                |          |       |   |    |    |     |     |          |          |  | aLIDHVR  | 1  | 1 | 1 |
|                                |          |       |   |    |    |     |     |          |          |  | TmTSELC  | 1  | 1 | 1 |
|                                |          |       |   |    |    |     |     |          |          |  | SKVLVDI  | 3  | 1 | 1 |
|                                |          |       |   |    |    |     |     |          |          |  | DSHHLTF  | 2  | 1 | 1 |
|                                |          |       |   |    |    |     |     |          |          |  | mRPTVLE  | 1  | 1 | 1 |
|                                |          |       |   |    |    |     |     |          |          |  | SKVLVDI  | 1  | 1 | 1 |
|                                |          |       |   |    |    |     |     |          |          |  | DSHHLTF  | 4  | 1 | 1 |
|                                |          |       |   |    |    |     |     |          |          |  | ALIDHVR  | 1  | 1 | 1 |
| Rv1621c, 15608759 PROBABI      | 9120.066 | 43.83 | 1 | 31 | 31 | 229 | 527 | 54.76422 | 10.9458  |  | TAADKA   | 2  | 1 | 1 |
|                                |          |       |   |    |    |     |     |          |          |  | AcAAAGI  | 14 | 1 | 1 |
|                                |          |       |   |    |    |     |     |          |          |  | HNLVLLC  | 9  | 1 | 1 |
|                                |          |       |   |    |    |     |     |          |          |  | AGATVLI  | 25 | 1 | 1 |
|                                |          |       |   |    |    |     |     |          |          |  | ALGSPA   | 6  | 1 | 1 |
|                                |          |       |   |    |    |     |     |          |          |  | APYDLTA  | 8  | 1 | 1 |
|                                |          |       |   |    |    |     |     |          |          |  | HNLVLLC  | 7  | 1 | 1 |
|                                |          |       |   |    |    |     |     |          |          |  | VGVQFH   | 55 | 1 | 1 |
|                                |          |       |   |    |    |     |     |          |          |  | ALGSPA   | 12 | 1 | 1 |
|                                |          |       |   |    |    |     |     |          |          |  | STTLQAL  | 2  | 1 | 1 |
|                                |          |       |   |    |    |     |     |          |          |  | AFALLGE  | 1  | 1 | 1 |



|                              |          |       |   |    |    |    |     |          |          |         |          |    |   |   |
|------------------------------|----------|-------|---|----|----|----|-----|----------|----------|---------|----------|----|---|---|
|                              |          |       |   |    |    |    |     |          |          |         | ITVAGVE  | 13 | 1 | 1 |
|                              |          |       |   |    |    |    |     |          |          |         | GGVGLSI  | 7  | 1 | 1 |
|                              |          |       |   |    |    |    |     |          |          |         | QQVAAA   | 4  | 1 | 1 |
|                              |          |       |   |    |    |    |     |          |          |         | TAADKA   | 3  | 1 | 1 |
|                              |          |       |   |    |    |    |     |          |          |         | VVEVNSI  | 2  | 1 | 1 |
|                              |          |       |   |    |    |    |     |          |          |         | DGRAPYI  | 6  | 1 | 1 |
|                              |          |       |   |    |    |    |     |          |          |         | AcAAAGF  | 3  | 1 | 1 |
|                              |          |       |   |    |    |    |     |          |          |         | ARAGAT   | 11 | 1 | 1 |
|                              |          |       |   |    |    |    |     |          |          |         | TEQHVLC  | 7  | 1 | 1 |
|                              |          |       |   |    |    |    |     |          |          |         | acAAAGF  | 1  | 1 | 1 |
|                              |          |       |   |    |    |    |     |          |          |         | AFALLGE  | 1  | 1 | 1 |
|                              |          |       |   |    |    |    |     |          |          |         | AGATVLI  | 2  | 1 | 1 |
|                              |          |       |   |    |    |    |     |          |          |         | GRDGRA   | 7  | 1 | 1 |
|                              |          |       |   |    |    |    |     |          |          |         | GLDTVLC  | 5  | 1 | 1 |
|                              |          |       |   |    |    |    |     |          |          |         | gGVGLSL  | 1  | 1 | 1 |
|                              |          |       |   |    |    |    |     |          |          |         | APYDLT   | 2  | 1 | 1 |
|                              |          |       |   |    |    |    |     |          |          |         | DGRAPYI  | 2  | 1 | 1 |
|                              |          |       |   |    |    |    |     |          |          |         | QQVAAA   | 2  | 1 | 1 |
|                              |          |       |   |    |    |    |     |          |          |         | VGVQFH   | 1  | 1 | 1 |
|                              |          |       |   |    |    |    |     |          |          |         | QLSWLPC  | 6  | 1 | 1 |
|                              |          |       |   |    |    |    |     |          |          |         | VVEVNSI  | 1  | 1 | 1 |
|                              |          |       |   |    |    |    |     |          |          |         | LERLSVR  | 1  | 1 | 1 |
| Rv1635c, 15608773 Probable c | 1233.483 | 6.83  | 1 | 3  | 3  | 28 | 556 | 59.99709 | 9.817871 | IMSASTL | 10       | 1  | 1 |   |
|                              |          |       |   |    |    |    |     |          |          |         | ImSASTLI | 15 | 1 | 1 |
|                              |          |       |   |    |    |    |     |          |          |         | imSASTLI | 1  | 1 | 1 |
|                              |          |       |   |    |    |    |     |          |          |         | TAGDQD   | 1  | 1 | 1 |
|                              |          |       |   |    |    |    |     |          |          |         | IMSASTL  | 1  | 1 | 1 |
| Rv1736c, 15608874 PROBABI    | 858.6324 | 11.96 | 1 | 11 | 11 | 25 | 652 | 72.77936 | 9.158691 | LGDPVA  | 6        | 1  | 1 |   |
|                              |          |       |   |    |    |    |     |          |          |         | SGRFFIPC | 2  | 1 | 1 |
|                              |          |       |   |    |    |    |     |          |          |         | FFIPGEIS | 6  | 1 | 1 |
|                              |          |       |   |    |    |    |     |          |          |         | GAAFSW   | 4  | 1 | 1 |
|                              |          |       |   |    |    |    |     |          |          |         | LGDPVA   | 1  | 1 | 1 |
|                              |          |       |   |    |    |    |     |          |          |         | IEELLAR  | 1  | 1 | 1 |
|                              |          |       |   |    |    |    |     |          |          |         | DGDVFI   | 1  | 1 | 1 |
|                              |          |       |   |    |    |    |     |          |          |         | ARLGDP   | 1  | 1 | 1 |
|                              |          |       |   |    |    |    |     |          |          |         | GGRDGD   | 1  | 1 | 1 |

|          |          |            |          |       |   |    |    |    |     |          |           |         |   |   |   |
|----------|----------|------------|----------|-------|---|----|----|----|-----|----------|-----------|---------|---|---|---|
|          |          |            |          |       |   |    |    |    |     |          | FFIPGEIS. | 1       | 1 | 1 |   |
|          |          |            |          |       |   |    |    |    |     |          | DRWSHD    | 1       | 1 | 1 |   |
| Rv1743,1 | 15608881 | PROBABI    | 1751.798 | 29.33 | 1 | 10 | 10 | 42 | 566 | 60.47443 | 6.062012  | SYASDID | 6 | 1 | 1 |
|          |          |            |          |       |   |    |    |    |     |          | TSAPPPPI  | 18      | 1 | 1 |   |
|          |          |            |          |       |   |    |    |    |     |          | SYASDID   | 2       | 1 | 1 |   |
|          |          |            |          |       |   |    |    |    |     |          | YHLLNFI   | 4       | 1 | 1 |   |
|          |          |            |          |       |   |    |    |    |     |          | AVAASYG   | 4       | 1 | 1 |   |
|          |          |            |          |       |   |    |    |    |     |          | YHLLNFI   | 3       | 1 | 1 |   |
|          |          |            |          |       |   |    |    |    |     |          | LYASFYS   | 1       | 1 | 1 |   |
|          |          |            |          |       |   |    |    |    |     |          | VLNDGV    | 1       | 1 | 1 |   |
|          |          |            |          |       |   |    |    |    |     |          | SSGPRTS.  | 2       | 1 | 1 |   |
|          |          |            |          |       |   |    |    |    |     |          | ATNASET   | 1       | 1 | 1 |   |
| Rv1797,1 | 15608934 | hypothetic | 1036.764 | 42.12 | 1 | 11 | 11 | 23 | 406 | 44.1508  | 6.888184  | LVSVIEV | 3 | 1 | 1 |
|          |          |            |          |       |   |    |    |    |     |          | NLRDHD    | 6       | 1 | 1 |   |
|          |          |            |          |       |   |    |    |    |     |          | DSLASTL   | 2       | 1 | 1 |   |
|          |          |            |          |       |   |    |    |    |     |          | VGSPALS   | 2       | 1 | 1 |   |
|          |          |            |          |       |   |    |    |    |     |          | DWSADP    | 2       | 1 | 1 |   |
|          |          |            |          |       |   |    |    |    |     |          | DHDELVI   | 2       | 1 | 1 |   |
|          |          |            |          |       |   |    |    |    |     |          | NVAAVA    | 2       | 1 | 1 |   |
|          |          |            |          |       |   |    |    |    |     |          | QFDIHL    | 1       | 1 | 1 |   |
|          |          |            |          |       |   |    |    |    |     |          | LVQDL     | 1       | 1 | 1 |   |
|          |          |            |          |       |   |    |    |    |     |          | TWLVLR    | 1       | 1 | 1 |   |
|          |          |            |          |       |   |    |    |    |     |          | RFGRDT    | 1       | 1 | 1 |   |
| Rv0062,2 | 57116687 | POSSIBLE   | 2296.069 | 50.79 | 1 | 15 | 15 | 60 | 380 | 39.94905 | 8.104004  | DcGSYAS | 6 | 1 | 1 |
|          |          |            |          |       |   |    |    |    |     |          | APALILV   | 2       | 1 | 1 |   |
|          |          |            |          |       |   |    |    |    |     |          | DPAAAV    | 7       | 1 | 1 |   |
|          |          |            |          |       |   |    |    |    |     |          | YTGAAQ    | 3       | 1 | 1 |   |
|          |          |            |          |       |   |    |    |    |     |          | YTGAAQ    | 1       | 1 | 1 |   |
|          |          |            |          |       |   |    |    |    |     |          | YAVDTL    | 8       | 1 | 1 |   |
|          |          |            |          |       |   |    |    |    |     |          | WLSAEAI   | 2       | 1 | 1 |   |
|          |          |            |          |       |   |    |    |    |     |          | WLSAEAI   | 5       | 1 | 1 |   |
|          |          |            |          |       |   |    |    |    |     |          | YTGAAQ    | 4       | 1 | 1 |   |
|          |          |            |          |       |   |    |    |    |     |          | NGAGPAI   | 3       | 1 | 1 |   |
|          |          |            |          |       |   |    |    |    |     |          | YAVDTL    | 4       | 1 | 1 |   |
|          |          |            |          |       |   |    |    |    |     |          | LNDVGV    | 1       | 1 | 1 |   |
|          |          |            |          |       |   |    |    |    |     |          | RPGESDC   | 1       | 1 | 1 |   |

|                           |          |       |   |    |    |    |     |          |          |         |          |    |   |   |
|---------------------------|----------|-------|---|----|----|----|-----|----------|----------|---------|----------|----|---|---|
|                           |          |       |   |    |    |    |     |          |          |         | WLSAEAI  | 2  | 1 | 1 |
|                           |          |       |   |    |    |    |     |          |          |         | NANPPN/  | 7  | 1 | 1 |
|                           |          |       |   |    |    |    |     |          |          |         | INDVGVC  | 1  | 1 | 1 |
|                           |          |       |   |    |    |    |     |          |          |         | QERFDLV  | 2  | 1 | 1 |
|                           |          |       |   |    |    |    |     |          |          |         | LNDVGV/  | 1  | 1 | 1 |
| Rv1625c, 57116894 MEMBRA  | 3874.876 | 38.6  | 1 | 20 | 20 | 94 | 443 | 47.33979 | 6.265137 | mESTDSV | 2        | 1  | 1 |   |
|                           |          |       |   |    |    |    |     |          |          |         | FFYDVW/  | 16 | 1 | 1 |
|                           |          |       |   |    |    |    |     |          |          |         | SEALLAN  | 1  | 1 | 1 |
|                           |          |       |   |    |    |    |     |          |          |         | MESTDSV  | 6  | 1 | 1 |
|                           |          |       |   |    |    |    |     |          |          |         | VGLATGI  | 10 | 1 | 1 |
|                           |          |       |   |    |    |    |     |          |          |         | SEALLAN  | 2  | 1 | 1 |
|                           |          |       |   |    |    |    |     |          |          |         | AEAVmE.  | 2  | 1 | 1 |
|                           |          |       |   |    |    |    |     |          |          |         | ASSTAPA  | 7  | 1 | 1 |
|                           |          |       |   |    |    |    |     |          |          |         | LYSAFDE  | 3  | 1 | 1 |
|                           |          |       |   |    |    |    |     |          |          |         | AEAVME   | 4  | 1 | 1 |
|                           |          |       |   |    |    |    |     |          |          |         | RFFYDVV  | 9  | 1 | 1 |
|                           |          |       |   |    |    |    |     |          |          |         | NIIADKY  | 1  | 1 | 1 |
|                           |          |       |   |    |    |    |     |          |          |         | AEAVmE.  | 4  | 1 | 1 |
|                           |          |       |   |    |    |    |     |          |          |         | GNPVPLR  | 4  | 1 | 1 |
|                           |          |       |   |    |    |    |     |          |          |         | AEAVME   | 1  | 1 | 1 |
|                           |          |       |   |    |    |    |     |          |          |         | FLDRLYS  | 2  | 1 | 1 |
|                           |          |       |   |    |    |    |     |          |          |         | LKDDFVI  | 2  | 1 | 1 |
|                           |          |       |   |    |    |    |     |          |          |         | AEAVmE.  | 1  | 1 | 1 |
|                           |          |       |   |    |    |    |     |          |          |         | VAADPGI  | 1  | 1 | 1 |
|                           |          |       |   |    |    |    |     |          |          |         | LKDDFVI  | 2  | 1 | 1 |
|                           |          |       |   |    |    |    |     |          |          |         | aEAVME/  | 1  | 1 | 1 |
|                           |          |       |   |    |    |    |     |          |          |         | aSSTAPAI | 2  | 1 | 1 |
|                           |          |       |   |    |    |    |     |          |          |         | TWYLIGF  | 6  | 1 | 1 |
|                           |          |       |   |    |    |    |     |          |          |         | TWYLIGF  | 1  | 1 | 1 |
|                           |          |       |   |    |    |    |     |          |          |         | VAADPGI  | 2  | 1 | 1 |
|                           |          |       |   |    |    |    |     |          |          |         | RFFYDVV  | 1  | 1 | 1 |
|                           |          |       |   |    |    |    |     |          |          |         | VGLATGI  | 1  | 1 | 1 |
| Rv1819c, 15608956 PROBABI | 1764.325 | 29.11 | 1 | 20 | 20 | 55 | 639 | 71.27251 | 8.572754 | LHENQLF | 11       | 1  | 1 |   |
|                           |          |       |   |    |    |    |     |          |          |         | GGSLVIT  | 2  | 1 | 1 |
|                           |          |       |   |    |    |    |     |          |          |         | SGAGKT1  | 4  | 1 | 1 |
|                           |          |       |   |    |    |    |     |          |          |         | ALPAVL1  | 6  | 1 | 1 |

|                               |          |       |   |    |    |     |     |          |          |        |          |    |   |   |
|-------------------------------|----------|-------|---|----|----|-----|-----|----------|----------|--------|----------|----|---|---|
|                               |          |       |   |    |    |     |     |          |          |        | SELPDcIV | 3  | 1 | 1 |
|                               |          |       |   |    |    |     |     |          |          |        | NNYDAF   | 2  | 1 | 1 |
|                               |          |       |   |    |    |     |     |          |          |        | LDRGGS   | 5  | 1 | 1 |
|                               |          |       |   |    |    |     |     |          |          |        | DVVCYP   | 2  | 1 | 1 |
|                               |          |       |   |    |    |     |     |          |          |        | SLAELW   | 2  | 1 | 1 |
|                               |          |       |   |    |    |     |     |          |          |        | DVVCYP   | 4  | 1 | 1 |
|                               |          |       |   |    |    |     |     |          |          |        | LHGLVD   | 2  | 1 | 1 |
|                               |          |       |   |    |    |     |     |          |          |        | TPAGDR   | 3  | 1 | 1 |
|                               |          |       |   |    |    |     |     |          |          |        | SLAELW   | 1  | 1 | 1 |
|                               |          |       |   |    |    |     |     |          |          |        | LAPVEA   | 1  | 1 | 1 |
|                               |          |       |   |    |    |     |     |          |          |        | ALPAVL   | 1  | 1 | 1 |
|                               |          |       |   |    |    |     |     |          |          |        | LHENQL   | 1  | 1 | 1 |
|                               |          |       |   |    |    |     |     |          |          |        | LIDPLD   | 1  | 1 | 1 |
|                               |          |       |   |    |    |     |     |          |          |        | LIDPLD   | 1  | 1 | 1 |
|                               |          |       |   |    |    |     |     |          |          |        | TPAGDR   | 1  | 1 | 1 |
|                               |          |       |   |    |    |     |     |          |          |        | SELPDcIV | 1  | 1 | 1 |
|                               |          |       |   |    |    |     |     |          |          |        | ALPAVL   | 1  | 1 | 1 |
| Rv1845c,15608982 hypothetical | 2140.999 | 29.43 | 1 | 11 | 11 | 48  | 316 | 32.71624 | 11.78076 | HDLVLE | 5        | 1  | 1 |   |
|                               |          |       |   |    |    |     |     |          |          |        | SRVVSE   | 3  | 1 | 1 |
|                               |          |       |   |    |    |     |     |          |          |        | VVVSEG   | 6  | 1 | 1 |
|                               |          |       |   |    |    |     |     |          |          |        | ARHDLV   | 20 | 1 | 1 |
|                               |          |       |   |    |    |     |     |          |          |        | APSGAL   | 4  | 1 | 1 |
|                               |          |       |   |    |    |     |     |          |          |        | VLDVAQ   | 3  | 1 | 1 |
|                               |          |       |   |    |    |     |     |          |          |        | SRVVSE   | 1  | 1 | 1 |
|                               |          |       |   |    |    |     |     |          |          |        | DLRVLD   | 2  | 1 | 1 |
|                               |          |       |   |    |    |     |     |          |          |        | ALVAcAS  | 1  | 1 | 1 |
|                               |          |       |   |    |    |     |     |          |          |        | VVVSEG   | 2  | 1 | 1 |
|                               |          |       |   |    |    |     |     |          |          |        | ALVAcAS  | 1  | 1 | 1 |
| Rv1877,115609014 PROBABI      | 3661.089 | 26.06 | 1 | 30 | 30 | 120 | 687 | 72.30787 | 6.741699 | EVPLTD | 2        | 1  | 1 |   |
|                               |          |       |   |    |    |     |     |          |          |        | EVPLTD   | 9  | 1 | 1 |
|                               |          |       |   |    |    |     |     |          |          |        | DWYEDL   | 5  | 1 | 1 |
|                               |          |       |   |    |    |     |     |          |          |        | QVDSLAV  | 2  | 1 | 1 |
|                               |          |       |   |    |    |     |     |          |          |        | AESPEDV  | 4  | 1 | 1 |
|                               |          |       |   |    |    |     |     |          |          |        | QWLLDH   | 2  | 1 | 1 |
|                               |          |       |   |    |    |     |     |          |          |        | LRDIATQ  | 5  | 1 | 1 |
|                               |          |       |   |    |    |     |     |          |          |        | LVQTGY   | 7  | 1 | 1 |

|          |          |          |          |       |   |    |    |    |     |          |          |         |    |   |   |
|----------|----------|----------|----------|-------|---|----|----|----|-----|----------|----------|---------|----|---|---|
|          |          |          |          |       |   |    |    |    |     |          | DWYEDL   | 2       | 1  | 1 |   |
|          |          |          |          |       |   |    |    |    |     |          | HLHVPYC  | 8       | 1  | 1 |   |
|          |          |          |          |       |   |    |    |    |     |          | DGDILTL  | 10      | 1  | 1 |   |
|          |          |          |          |       |   |    |    |    |     |          | DIATQPG  | 3       | 1  | 1 |   |
|          |          |          |          |       |   |    |    |    |     |          | LVQTGYL  | 7       | 1  | 1 |   |
|          |          |          |          |       |   |    |    |    |     |          | QVDSLAV  | 7       | 1  | 1 |   |
|          |          |          |          |       |   |    |    |    |     |          | QVDSLAV  | 2       | 1  | 1 |   |
|          |          |          |          |       |   |    |    |    |     |          | RQPDHQI  | 1       | 1  | 1 |   |
|          |          |          |          |       |   |    |    |    |     |          | RQPDHQI  | 2       | 1  | 1 |   |
|          |          |          |          |       |   |    |    |    |     |          | HLHVPYC  | 6       | 1  | 1 |   |
|          |          |          |          |       |   |    |    |    |     |          | LFEAVRL  | 1       | 1  | 1 |   |
|          |          |          |          |       |   |    |    |    |     |          | QPDHQFE  | 7       | 1  | 1 |   |
|          |          |          |          |       |   |    |    |    |     |          | QPDHQFE  | 8       | 1  | 1 |   |
|          |          |          |          |       |   |    |    |    |     |          | LTDIGRH  | 1       | 1  | 1 |   |
|          |          |          |          |       |   |    |    |    |     |          | EVPLTDI  | 2       | 1  | 1 |   |
|          |          |          |          |       |   |    |    |    |     |          | RMLPNGV  | 1       | 1  | 1 |   |
|          |          |          |          |       |   |    |    |    |     |          | DGDILTL  | 2       | 1  | 1 |   |
|          |          |          |          |       |   |    |    |    |     |          | LTDIGRH  | 3       | 1  | 1 |   |
|          |          |          |          |       |   |    |    |    |     |          | AESPEDV  | 5       | 1  | 1 |   |
|          |          |          |          |       |   |    |    |    |     |          | MLPNGV   | 1       | 1  | 1 |   |
|          |          |          |          |       |   |    |    |    |     |          | QWLLDH   | 1       | 1  | 1 |   |
|          |          |          |          |       |   |    |    |    |     |          | HLHVPYC  | 4       | 1  | 1 |   |
| Rv1973,7 | 15609110 | POSSIBLE | 72.5697  | 21.25 | 1 | 2  | 2  | 2  | 160 | 16.81384 | 7.356934 | AATDGT  | 1  | 1 | 1 |
|          |          |          |          |       |   |    |    |    |     |          |          | WLISQFE | 1  | 1 | 1 |
| Rv1997,9 | 15609134 | PROBABI  | 2953.923 | 29.17 | 1 | 19 | 19 | 69 | 905 | 94.9729  | 5.60498  | WSLLAG  | 16 | 1 | 1 |
|          |          |          |          |       |   |    |    |    |     |          |          | GHVVAM  | 2  | 1 | 1 |
|          |          |          |          |       |   |    |    |    |     |          |          | AAAASA  | 2  | 1 | 1 |
|          |          |          |          |       |   |    |    |    |     |          |          | GHVVAm  | 4  | 1 | 1 |
|          |          |          |          |       |   |    |    |    |     |          |          | RLPAVET | 2  | 1 | 1 |
|          |          |          |          |       |   |    |    |    |     |          |          | LATTLPQ | 7  | 1 | 1 |
|          |          |          |          |       |   |    |    |    |     |          |          | VLATGm  | 2  | 1 | 1 |
|          |          |          |          |       |   |    |    |    |     |          |          | LVQALQ  | 5  | 1 | 1 |
|          |          |          |          |       |   |    |    |    |     |          |          | ATEmLTS | 1  | 1 | 1 |
|          |          |          |          |       |   |    |    |    |     |          |          | DGTRWQ  | 1  | 1 | 1 |
|          |          |          |          |       |   |    |    |    |     |          |          | QANIGVA | 2  | 1 | 1 |
|          |          |          |          |       |   |    |    |    |     |          |          | DGTDHV  | 1  | 1 | 1 |

|                              |          |       |   |    |    |    |     |          |          |  |          |         |   |   |   |
|------------------------------|----------|-------|---|----|----|----|-----|----------|----------|--|----------|---------|---|---|---|
|                              |          |       |   |    |    |    |     |          |          |  |          | ATEMLTS | 1 | 1 | 1 |
|                              |          |       |   |    |    |    |     |          |          |  |          | QANIGVA | 1 | 1 | 1 |
|                              |          |       |   |    |    |    |     |          |          |  |          | WLLAG   | 3 | 1 | 1 |
|                              |          |       |   |    |    |    |     |          |          |  |          | mLDLcGT | 3 | 1 | 1 |
|                              |          |       |   |    |    |    |     |          |          |  |          | ATEmLTS | 1 | 1 | 1 |
|                              |          |       |   |    |    |    |     |          |          |  |          | QYmATLI | 1 | 1 | 1 |
|                              |          |       |   |    |    |    |     |          |          |  |          | ATGTGYL | 2 | 1 | 1 |
|                              |          |       |   |    |    |    |     |          |          |  |          | LRLVQAI | 1 | 1 | 1 |
|                              |          |       |   |    |    |    |     |          |          |  |          | GVFDNL  | 1 | 1 | 1 |
|                              |          |       |   |    |    |    |     |          |          |  |          | MLDLcG1 | 2 | 1 | 1 |
|                              |          |       |   |    |    |    |     |          |          |  |          | VLATGmt | 4 | 1 | 1 |
|                              |          |       |   |    |    |    |     |          |          |  |          | VSPEQKL | 1 | 1 | 1 |
|                              |          |       |   |    |    |    |     |          |          |  |          | MLDLcG1 | 1 | 1 | 1 |
|                              |          |       |   |    |    |    |     |          |          |  |          | gHVVAmt | 1 | 1 | 1 |
|                              |          |       |   |    |    |    |     |          |          |  |          | VLATGM  | 1 | 1 | 1 |
| Rv2154c, 15609291 FtsW-like  | 832.7713 | 9.73  | 1 | 6  | 6  | 40 | 524 | 56.30131 | 11.15088 |  | LPLPEPYI | 16      | 1 | 1 |   |
|                              |          |       |   |    |    |    |     |          |          |  | ANQPAC   | 4       | 1 | 1 |   |
|                              |          |       |   |    |    |    |     |          |          |  | aNPQPAQ  | 1       | 1 | 1 |   |
|                              |          |       |   |    |    |    |     |          |          |  | LLRLPLP  | 5       | 1 | 1 |   |
|                              |          |       |   |    |    |    |     |          |          |  | LPLPEPYI | 8       | 1 | 1 |   |
|                              |          |       |   |    |    |    |     |          |          |  | TAPGQPA  | 1       | 1 | 1 |   |
|                              |          |       |   |    |    |    |     |          |          |  | QmGLPPF  | 4       | 1 | 1 |   |
|                              |          |       |   |    |    |    |     |          |          |  | QMGLPPI  | 1       | 1 | 1 |   |
| Rv2195,1 15609332 Probable R | 259.1077 | 11.66 | 1 | 4  | 4  | 8  | 429 | 46.89304 | 6.150879 |  | EPDEAAL  | 1       | 1 | 1 |   |
|                              |          |       |   |    |    |    |     |          |          |  | ADDDAV   | 4       | 1 | 1 |   |
|                              |          |       |   |    |    |    |     |          |          |  | IAYKEPR  | 2       | 1 | 1 |   |
|                              |          |       |   |    |    |    |     |          |          |  | ADDDAV   | 1       | 1 | 1 |   |
| Rv2200c, 15609337 PROBABI    | 821.4217 | 36.36 | 1 | 12 | 12 | 22 | 363 | 40.45389 | 7.840332 |  | VETLGTS  | 1       | 1 | 1 |   |
|                              |          |       |   |    |    |    |     |          |          |  | IDGKTNA  | 2       | 1 | 1 |   |
|                              |          |       |   |    |    |    |     |          |          |  | AINQPPL  | 6       | 1 | 1 |   |
|                              |          |       |   |    |    |    |     |          |          |  | DVMPNP   | 1       | 1 | 1 |   |
|                              |          |       |   |    |    |    |     |          |          |  | DGTLTYI  | 2       | 1 | 1 |   |
|                              |          |       |   |    |    |    |     |          |          |  | VNFKDG   | 4       | 1 | 1 |   |
|                              |          |       |   |    |    |    |     |          |          |  | IEFQmAS  | 1       | 1 | 1 |   |
|                              |          |       |   |    |    |    |     |          |          |  | YGEELVC  | 1       | 1 | 1 |   |
|                              |          |       |   |    |    |    |     |          |          |  | AINQPPL  | 1       | 1 | 1 |   |

|                               |          |       |   |    |    |     |     |          |          |  |          |    |   |   |
|-------------------------------|----------|-------|---|----|----|-----|-----|----------|----------|--|----------|----|---|---|
|                               |          |       |   |    |    |     |     |          |          |  | AYLQQR   | 1  | 1 | 1 |
|                               |          |       |   |    |    |     |     |          |          |  | TYLNFDK  | 1  | 1 | 1 |
|                               |          |       |   |    |    |     |     |          |          |  | TYLNFDK  | 1  | 1 | 1 |
| Rv2236c,15609373 cobalamin    | 3955.468 | 41.53 | 1 | 17 | 17 | 101 | 313 | 32.95573 | 10.9751  |  | SWPVAA'  | 20 | 1 | 1 |
|                               |          |       |   |    |    |     |     |          |          |  | LDDWAN   | 20 | 1 | 1 |
|                               |          |       |   |    |    |     |     |          |          |  | AALESVA  | 10 | 1 | 1 |
|                               |          |       |   |    |    |     |     |          |          |  | DPAQLGC  | 3  | 1 | 1 |
|                               |          |       |   |    |    |     |     |          |          |  | FGWAAA   | 6  | 1 | 1 |
|                               |          |       |   |    |    |     |     |          |          |  | AINTLDS  | 6  | 1 | 1 |
|                               |          |       |   |    |    |     |     |          |          |  | AINTLDS  | 5  | 1 | 1 |
|                               |          |       |   |    |    |     |     |          |          |  | TGRQISD  | 3  | 1 | 1 |
|                               |          |       |   |    |    |     |     |          |          |  | RLLPSLcC | 2  | 1 | 1 |
|                               |          |       |   |    |    |     |     |          |          |  | LLPSLcGI | 6  | 1 | 1 |
|                               |          |       |   |    |    |     |     |          |          |  | QISDLLEI | 4  | 1 | 1 |
|                               |          |       |   |    |    |     |     |          |          |  | TGRQISD  | 1  | 1 | 1 |
|                               |          |       |   |    |    |     |     |          |          |  | RLLPSLcC | 1  | 1 | 1 |
|                               |          |       |   |    |    |     |     |          |          |  | FGWAAA   | 2  | 1 | 1 |
|                               |          |       |   |    |    |     |     |          |          |  | YLRFGW.  | 2  | 1 | 1 |
|                               |          |       |   |    |    |     |     |          |          |  | QISDLLEI | 4  | 1 | 1 |
|                               |          |       |   |    |    |     |     |          |          |  | AINTLDS  | 2  | 1 | 1 |
|                               |          |       |   |    |    |     |     |          |          |  | QISDLLEI | 3  | 1 | 1 |
|                               |          |       |   |    |    |     |     |          |          |  | AINTLDS  | 1  | 1 | 1 |
| Rv2262c,15609399 hypothetical | 2165.192 | 30.56 | 1 | 10 | 10 | 66  | 360 | 37.23482 | 9.480957 |  | LAAGEEF  | 18 | 1 | 1 |
|                               |          |       |   |    |    |     |     |          |          |  | VGADLL'  | 3  | 1 | 1 |
|                               |          |       |   |    |    |     |     |          |          |  | SAVLVG/  | 3  | 1 | 1 |
|                               |          |       |   |    |    |     |     |          |          |  | LVPFGEY  | 15 | 1 | 1 |
|                               |          |       |   |    |    |     |     |          |          |  | TRLVPFG  | 2  | 1 | 1 |
|                               |          |       |   |    |    |     |     |          |          |  | IVPFGEY' | 1  | 1 | 1 |
|                               |          |       |   |    |    |     |     |          |          |  | LAAGEEF  | 5  | 1 | 1 |
|                               |          |       |   |    |    |     |     |          |          |  | LAELSQR  | 7  | 1 | 1 |
|                               |          |       |   |    |    |     |     |          |          |  | HPDVLAH  | 2  | 1 | 1 |
|                               |          |       |   |    |    |     |     |          |          |  | fSAGSPA' | 1  | 1 | 1 |
|                               |          |       |   |    |    |     |     |          |          |  | FSAGSPA  | 8  | 1 | 1 |
|                               |          |       |   |    |    |     |     |          |          |  | LVPFGEY  | 1  | 1 | 1 |
| Rv2306A 57116962 POSSIBLE     | 66.4177  | 12.18 | 1 | 2  | 2  | 3   | 197 | 21.21906 | 11.81006 |  | WSVSASS  | 1  | 1 | 1 |
|                               |          |       |   |    |    |     |     |          |          |  | cWVSIAP  | 2  | 1 | 1 |

|          |          |          |          |       |   |    |    |     |     |          |          |         |    |   |   |
|----------|----------|----------|----------|-------|---|----|----|-----|-----|----------|----------|---------|----|---|---|
| Rv2339,1 | 15609476 | PROBABI  | 2608.856 | 8.94  | 1 | 8  | 8  | 48  | 962 | 104.5453 | 7.166504 | TYVTGPA | 27 | 1 | 1 |
|          |          |          |          |       |   |    |    |     |     |          |          | DPLTAAC | 1  | 1 | 1 |
|          |          |          |          |       |   |    |    |     |     |          |          | KIVANST | 1  | 1 | 1 |
|          |          |          |          |       |   |    |    |     |     |          |          | AVAVAPI | 8  | 1 | 1 |
|          |          |          |          |       |   |    |    |     |     |          |          | YYDHLV  | 5  | 1 | 1 |
|          |          |          |          |       |   |    |    |     |     |          |          | YYDHLV  | 2  | 1 | 1 |
|          |          |          |          |       |   |    |    |     |     |          |          | AVAVAPI | 2  | 1 | 1 |
|          |          |          |          |       |   |    |    |     |     |          |          | IVANSTP | 1  | 1 | 1 |
| Rv2345,8 | 15609482 | POSSIBLE | 4060.194 | 14.85 | 1 | 13 | 13 | 102 | 660 | 69.98758 | 8.382324 | TSELGNY | 17 | 1 | 1 |
|          |          |          |          |       |   |    |    |     |     |          |          | LSNYVTI | 14 | 1 | 1 |
|          |          |          |          |       |   |    |    |     |     |          |          | LWVVYV  | 15 | 1 | 1 |
|          |          |          |          |       |   |    |    |     |     |          |          | TSELGNY | 5  | 1 | 1 |
|          |          |          |          |       |   |    |    |     |     |          |          | TSELGNY | 4  | 1 | 1 |
|          |          |          |          |       |   |    |    |     |     |          |          | TTRTSEL | 2  | 1 | 1 |
|          |          |          |          |       |   |    |    |     |     |          |          | TAVTAA' | 3  | 1 | 1 |
|          |          |          |          |       |   |    |    |     |     |          |          | TAVTAA' | 5  | 1 | 1 |
|          |          |          |          |       |   |    |    |     |     |          |          | EYAFLVF | 3  | 1 | 1 |
|          |          |          |          |       |   |    |    |     |     |          |          | EYAFLVF | 2  | 1 | 1 |
|          |          |          |          |       |   |    |    |     |     |          |          | IRLWVV  | 3  | 1 | 1 |
|          |          |          |          |       |   |    |    |     |     |          |          | TAVTAA' | 8  | 1 | 1 |
|          |          |          |          |       |   |    |    |     |     |          |          | TSELGNY | 6  | 1 | 1 |
|          |          |          |          |       |   |    |    |     |     |          |          | LYADRR  | 1  | 1 | 1 |
|          |          |          |          |       |   |    |    |     |     |          |          | TSELGNY | 10 | 1 | 1 |
| EYAFLVF  | 2        | 1        | 1        |       |   |    |    |     |     |          |          |         |    |   |   |
| EYAFLVF  | 2        | 1        | 1        |       |   |    |    |     |     |          |          |         |    |   |   |
| Rv2443,1 | 15609580 | PROBABI  | 242.4303 | 6.52  | 1 | 2  | 2  | 5   | 491 | 50.95558 | 8.279785 | SLTNFSG | 4  | 1 | 1 |
|          |          |          |          |       |   |    |    |     |     |          |          | TIDLSKA | 1  | 1 | 1 |
| Rv2643,1 | 15609780 | PROBABI  | 1254.729 | 11.45 | 1 | 6  | 6  | 39  | 498 | 53.19164 | 8.51416  | SQmAAGI | 4  | 1 | 1 |
|          |          |          |          |       |   |    |    |     |     |          |          | VQALIAE | 1  | 1 | 1 |
|          |          |          |          |       |   |    |    |     |     |          |          | LPDPAGC | 3  | 1 | 1 |
|          |          |          |          |       |   |    |    |     |     |          |          | SQMAAG  | 2  | 1 | 1 |
|          |          |          |          |       |   |    |    |     |     |          |          | sQmAAGI | 1  | 1 | 1 |
|          |          |          |          |       |   |    |    |     |     |          |          | SQMAAG  | 10 | 1 | 1 |
|          |          |          |          |       |   |    |    |     |     |          |          | NWKLPD  | 2  | 1 | 1 |
| SQmAAGI  | 10       | 1        | 1        |       |   |    |    |     |     |          |          |         |    |   |   |



|          |          |         |          |          |    |    |    |    |     |          |          |          |         |    |   |   |
|----------|----------|---------|----------|----------|----|----|----|----|-----|----------|----------|----------|---------|----|---|---|
|          |          |         |          |          |    |    |    |    |     |          | sQMAAGI  | 1        | 1       | 1  |   |   |
|          |          |         |          |          |    |    |    |    |     |          | MIRDDIA  | 3        | 1       | 1  |   |   |
|          |          |         |          |          |    |    |    |    |     |          | mIRDDIA  | 1        | 1       | 1  |   |   |
|          |          |         |          |          |    |    |    |    |     |          | nWKLPGI  | 1        | 1       | 1  |   |   |
| Rv2673,2 | 57117165 | 6       | KDA EA   | 1023.593 | 40 | 1  | 2  | 2  | 27  | 95       | 9.897765 | 4.513184 | TISEAGQ | 25 | 1 | 1 |
|          |          |         |          |          |    |    |    |    |     |          | WDATAT   | 1        | 1       | 1  |   |   |
|          |          |         |          |          |    |    |    |    |     |          | TISEAGQ  | 1        | 1       | 1  |   |   |
| Rv2690c, | 15609827 | PROBABI | 2374.085 | 20.4     | 1  | 17 | 17 | 81 | 657 | 70.75695 | 9.671387 | ATRPDVI  | 11      | 1  | 1 |   |
|          |          |         |          |          |    |    |    |    |     |          | WWEQLL   | 3        | 1       | 1  |   |   |
|          |          |         |          |          |    |    |    |    |     |          | ATRPDVI  | 18       | 1       | 1  |   |   |
|          |          |         |          |          |    |    |    |    |     |          | IKTLQPH  | 2        | 1       | 1  |   |   |
|          |          |         |          |          |    |    |    |    |     |          | QWQDSD   | 2        | 1       | 1  |   |   |
|          |          |         |          |          |    |    |    |    |     |          | LLFMPGV  | 7        | 1       | 1  |   |   |
|          |          |         |          |          |    |    |    |    |     |          | LLFMPGV  | 6        | 1       | 1  |   |   |
|          |          |         |          |          |    |    |    |    |     |          | TLQPHA   | 2        | 1       | 1  |   |   |
|          |          |         |          |          |    |    |    |    |     |          | TVVTVFI  | 4        | 1       | 1  |   |   |
|          |          |         |          |          |    |    |    |    |     |          | NHAVVL   | 4        | 1       | 1  |   |   |
|          |          |         |          |          |    |    |    |    |     |          | GRLLFMI  | 1        | 1       | 1  |   |   |
|          |          |         |          |          |    |    |    |    |     |          | LLFmPGV  | 8        | 1       | 1  |   |   |
|          |          |         |          |          |    |    |    |    |     |          | GRLLFMI  | 2        | 1       | 1  |   |   |
|          |          |         |          |          |    |    |    |    |     |          | QWQDSD   | 1        | 1       | 1  |   |   |
|          |          |         |          |          |    |    |    |    |     |          | ELVRQW   | 1        | 1       | 1  |   |   |
|          |          |         |          |          |    |    |    |    |     |          | EITRPVLI | 4        | 1       | 1  |   |   |
|          |          |         |          |          |    |    |    |    |     |          | EITRPVLI | 2        | 1       | 1  |   |   |
|          |          |         |          |          |    |    |    |    |     |          | ATRPDVI  | 1        | 1       | 1  |   |   |
|          |          |         |          |          |    |    |    |    |     |          | NHAVVL   | 1        | 1       | 1  |   |   |
|          |          |         |          |          |    |    |    |    |     |          | LHLPTLR  | 1        | 1       | 1  |   |   |
| Rv2748c, | 15609885 | POSSIBL | 1626.183 | 5.44     | 1  | 4  | 4  | 33 | 883 | 94.34746 | 8.42627  | GEQIAVT  | 27      | 1  | 1 |   |
|          |          |         |          |          |    |    |    |    |     |          | LAVmSSk  | 1        | 1       | 1  |   |   |
|          |          |         |          |          |    |    |    |    |     |          | SLLVSTG  | 1        | 1       | 1  |   |   |
|          |          |         |          |          |    |    |    |    |     |          | RPWQRG   | 4        | 1       | 1  |   |   |
| Rv3252c, | 15610388 | PROBABI | 1341.281 | 19.23    | 1  | 7  | 7  | 58 | 416 | 46.98435 | 9.129395 | cAPVHSW  | 7       | 1  | 1 |   |
|          |          |         |          |          |    |    |    |    |     |          | VLEHYG   | 23       | 1       | 1  |   |   |
|          |          |         |          |          |    |    |    |    |     |          | SMAGAP   | 3        | 1       | 1  |   |   |
|          |          |         |          |          |    |    |    |    |     |          | SmAGAP   | 8        | 1       | 1  |   |   |
|          |          |         |          |          |    |    |    |    |     |          | SmAGAP   | 7        | 1       | 1  |   |   |

|                            |          |       |   |    |    |    |      |          |          |  |         |    |   |   |
|----------------------------|----------|-------|---|----|----|----|------|----------|----------|--|---------|----|---|---|
|                            |          |       |   |    |    |    |      |          |          |  | VLEHYG  | 5  | 1 | 1 |
|                            |          |       |   |    |    |    |      |          |          |  | VREKAL  | 3  | 1 | 1 |
|                            |          |       |   |    |    |    |      |          |          |  | RYQTLR  | 1  | 1 | 1 |
|                            |          |       |   |    |    |    |      |          |          |  | VNLHPR  | 1  | 1 | 1 |
| Rv3764c, 15610900 POSSIBLE | 145.7162 | 5.89  | 1 | 2  | 2  | 3  | 475  | 50.31343 | 7.459473 |  | TPLTLDL | 2  | 1 | 1 |
|                            |          |       |   |    |    |    |      |          |          |  | HLVAQLI | 1  | 1 | 1 |
| Rv3779,1 15610915 PROBABI  | 397.6234 | 7.06  | 1 | 4  | 4  | 12 | 666  | 71.74907 | 9.246582 |  | VLEAIQV | 1  | 1 | 1 |
|                            |          |       |   |    |    |    |      |          |          |  | GFAVPDC | 4  | 1 | 1 |
|                            |          |       |   |    |    |    |      |          |          |  | FIFWAYC | 6  | 1 | 1 |
|                            |          |       |   |    |    |    |      |          |          |  | DLDAmA  | 1  | 1 | 1 |
| Rv3869,1 15611005 POSSIBLE | 2673.998 | 36.25 | 1 | 13 | 13 | 57 | 480  | 51.06069 | 7.620605 |  | SAGDQSF | 11 | 1 | 1 |
|                            |          |       |   |    |    |    |      |          |          |  | YTESmY  | 8  | 1 | 1 |
|                            |          |       |   |    |    |    |      |          |          |  | ATNQLY  | 11 | 1 | 1 |
|                            |          |       |   |    |    |    |      |          |          |  | ATQAHG  | 9  | 1 | 1 |
|                            |          |       |   |    |    |    |      |          |          |  | YTESMY  | 2  | 1 | 1 |
|                            |          |       |   |    |    |    |      |          |          |  | LGGTSLF | 2  | 1 | 1 |
|                            |          |       |   |    |    |    |      |          |          |  | ATQAHG  | 2  | 1 | 1 |
|                            |          |       |   |    |    |    |      |          |          |  | SLGLSSP | 1  | 1 | 1 |
|                            |          |       |   |    |    |    |      |          |          |  | FVALQSP | 1  | 1 | 1 |
|                            |          |       |   |    |    |    |      |          |          |  | IVSRPQD | 2  | 1 | 1 |
|                            |          |       |   |    |    |    |      |          |          |  | LVLGNP  | 1  | 1 | 1 |
|                            |          |       |   |    |    |    |      |          |          |  | HAILTD  | 3  | 1 | 1 |
|                            |          |       |   |    |    |    |      |          |          |  | DAALLE  | 2  | 1 | 1 |
|                            |          |       |   |    |    |    |      |          |          |  | LLVDGP  | 1  | 1 | 1 |
|                            |          |       |   |    |    |    |      |          |          |  | GRHAIL  | 1  | 1 | 1 |
| Rv3877,1 15611013 PROBABI  | 246.8192 | 10.37 | 1 | 3  | 3  | 6  | 511  | 53.96515 | 6.800293 |  | YRPLVEL | 2  | 1 | 1 |
|                            |          |       |   |    |    |    |      |          |          |  | LDQSLDI | 2  | 1 | 1 |
|                            |          |       |   |    |    |    |      |          |          |  | VTILTGR | 2  | 1 | 1 |
| Rv3894c, 15611030 POSSIBLE | 638.1271 | 7.74  | 1 | 11 | 11 | 18 | 1396 | 153.6044 | 6.442871 |  | VGTGVQ  | 3  | 1 | 1 |
|                            |          |       |   |    |    |    |      |          |          |  | EWQNAV  | 2  | 1 | 1 |
|                            |          |       |   |    |    |    |      |          |          |  | SAPGFSF | 1  | 1 | 1 |
|                            |          |       |   |    |    |    |      |          |          |  | GDVDFLI | 1  | 1 | 1 |
|                            |          |       |   |    |    |    |      |          |          |  | DEIQTAV | 1  | 1 | 1 |
|                            |          |       |   |    |    |    |      |          |          |  | GRGDVD  | 3  | 1 | 1 |
|                            |          |       |   |    |    |    |      |          |          |  | DLDTNRI | 2  | 1 | 1 |
|                            |          |       |   |    |    |    |      |          |          |  | VGTGVQ  | 2  | 1 | 1 |

|                               |          |       |   |    |    |     |     |          |          |          |         |          |            |   |
|-------------------------------|----------|-------|---|----|----|-----|-----|----------|----------|----------|---------|----------|------------|---|
|                               |          |       |   |    |    |     |     |          |          |          | DFILEQR | 1        | 1          | 1 |
|                               |          |       |   |    |    |     |     |          |          |          | DLDTNRI | 1        | 1          | 1 |
|                               |          |       |   |    |    |     |     |          |          |          | YLRDLDT | 1        | 1          | 1 |
| Rv3921c, 15611057 putative in | 123.93   | 10.38 | 1 | 2  | 2  | 3   | 366 | 40.8903  | 10.11084 |          | TAPATN/ | 2        | 1          | 1 |
|                               |          |       |   |    |    |     |     |          |          |          | TAPATN/ | 1        | 1          | 1 |
| Rv0008c, 15607150 POSSIBLE    | 2247.172 | 48.97 | 1 | 6  | 6  | 39  | 145 | 15.66147 | 11.41455 | Sequence | PSMs    | Proteins | Protein Gr |   |
|                               |          |       |   |    |    |     |     |          |          |          | EVAAAQI | 2        | 1          | 1 |
|                               |          |       |   |    |    |     |     |          |          |          | GLLELGV | 16       | 1          | 1 |
|                               |          |       |   |    |    |     |     |          |          |          | EVAAAQI | 17       | 1          | 1 |
|                               |          |       |   |    |    |     |     |          |          |          | GLLELGV | 2        | 1          | 1 |
|                               |          |       |   |    |    |     |     |          |          |          | GLAYSAV | 1        | 1          | 1 |
|                               |          |       |   |    |    |     |     |          |          |          | STAAGLF | 1        | 1          | 1 |
| Rv0392c 15607533 PROBABI      | 1085.181 | 34.47 | 1 | 12 | 12 | 28  | 470 | 50.35336 | 8.470215 | Sequence | PSMs    | Proteins | Protein Gr |   |
|                               |          |       |   |    |    |     |     |          |          |          | ILGAFEA | 5        | 1          | 1 |
|                               |          |       |   |    |    |     |     |          |          |          | MIAEGSI | 1        | 1          | 1 |
|                               |          |       |   |    |    |     |     |          |          |          | VLLGEVT | 2        | 1          | 1 |
|                               |          |       |   |    |    |     |     |          |          |          | mIAEGSD | 1        | 1          | 1 |
|                               |          |       |   |    |    |     |     |          |          |          | RLTFVVV | 1        | 1          | 1 |
|                               |          |       |   |    |    |     |     |          |          |          | LTFVVVC | 6        | 1          | 1 |
|                               |          |       |   |    |    |     |     |          |          |          | IAALFAW | 1        | 1          | 1 |
|                               |          |       |   |    |    |     |     |          |          |          | VWAAGV  | 1        | 1          | 1 |
|                               |          |       |   |    |    |     |     |          |          |          | VILLDAA | 3        | 1          | 1 |
|                               |          |       |   |    |    |     |     |          |          |          | TIDDALE | 2        | 1          | 1 |
|                               |          |       |   |    |    |     |     |          |          |          | VIVEPDL | 1        | 1          | 1 |
|                               |          |       |   |    |    |     |     |          |          |          | VILLDAA | 1        | 1          | 1 |
|                               |          |       |   |    |    |     |     |          |          |          | GHPNVFV | 1        | 1          | 1 |
|                               |          |       |   |    |    |     |     |          |          |          | ILGAFEA | 2        | 1          | 1 |
| Rv0758, 15607898 POSSIBLE     | 5599.492 | 63.71 | 1 | 23 | 25 | 121 | 485 | 51.98448 | 7.078613 | Sequence | PSMs    | Proteins | Protein Gr |   |
|                               |          |       |   |    |    |     |     |          |          |          | ASDGYL  | 19       | 1          | 1 |
|                               |          |       |   |    |    |     |     |          |          |          | VGTEGDI | 2        | 1          | 1 |
|                               |          |       |   |    |    |     |     |          |          |          | ITLEVLD | 8        | 1          | 1 |
|                               |          |       |   |    |    |     |     |          |          |          | VGTEGDI | 2        | 1          | 1 |
|                               |          |       |   |    |    |     |     |          |          |          | MGLLVD  | 6        | 1          | 1 |
|                               |          |       |   |    |    |     |     |          |          |          | VLLEEAC | 4        | 1          | 1 |
|                               |          |       |   |    |    |     |     |          |          |          | VGTEGDI | 5        | 1          | 1 |
|                               |          |       |   |    |    |     |     |          |          |          | mGLLVDI | 10       | 1          | 1 |

|         |          |         |          |      |   |   |   |    |     |          |          |          |      |          |            |
|---------|----------|---------|----------|------|---|---|---|----|-----|----------|----------|----------|------|----------|------------|
|         |          |         |          |      |   |   |   |    |     |          | VDLLAL   | 10       | 1    | 1        |            |
|         |          |         |          |      |   |   |   |    |     |          | RITLEVL  | 4        | 1    | 1        |            |
|         |          |         |          |      |   |   |   |    |     |          | QFITDAS  | 5        | 2    | 2        |            |
|         |          |         |          |      |   |   |   |    |     |          | SLRPLAE  | 6        | 1    | 1        |            |
|         |          |         |          |      |   |   |   |    |     |          | LSLALNC  | 3        | 1    | 1        |            |
|         |          |         |          |      |   |   |   |    |     |          | LSLALNC  | 1        | 1    | 1        |            |
|         |          |         |          |      |   |   |   |    |     |          | NLVANA   | 6        | 1    | 1        |            |
|         |          |         |          |      |   |   |   |    |     |          | ASDGYL   | 1        | 1    | 1        |            |
|         |          |         |          |      |   |   |   |    |     |          | RSLRPLA  | 3        | 1    | 1        |            |
|         |          |         |          |      |   |   |   |    |     |          | mGLLVDI  | 2        | 1    | 1        |            |
|         |          |         |          |      |   |   |   |    |     |          | DVGmLL   | 5        | 1    | 1        |            |
|         |          |         |          |      |   |   |   |    |     |          | SLRPLAE  | 2        | 1    | 1        |            |
|         |          |         |          |      |   |   |   |    |     |          | IESEASR  | 1        | 1    | 1        |            |
|         |          |         |          |      |   |   |   |    |     |          | sLRPLAE  | 1        | 1    | 1        |            |
|         |          |         |          |      |   |   |   |    |     |          | TPLTTIR  | 3        | 1    | 1        |            |
|         |          |         |          |      |   |   |   |    |     |          | mRQFITD  | 4        | 2    | 2        |            |
|         |          |         |          |      |   |   |   |    |     |          | ITLEVLD  | 1        | 1    | 1        |            |
|         |          |         |          |      |   |   |   |    |     |          | ASGGTGI  | 1        | 1    | 1        |            |
|         |          |         |          |      |   |   |   |    |     |          | GFAELYF  | 1        | 1    | 1        |            |
|         |          |         |          |      |   |   |   |    |     |          | DVGMLL   | 1        | 1    | 1        |            |
|         |          |         |          |      |   |   |   |    |     |          | LDAHRPI  | 1        | 1    | 1        |            |
|         |          |         |          |      |   |   |   |    |     |          | mGLLVDI  | 1        | 1    | 1        |            |
|         |          |         |          |      |   |   |   |    |     |          | VISPDGQ  | 1        | 1    | 1        |            |
|         |          |         |          |      |   |   |   |    |     |          | QFITDAS  | 1        | 1    | 1        |            |
| Rv0774c | 57116780 | PROBABI | 1769.626 | 49.5 | 1 | 6 | 6 | 42 | 303 | 30.63452 | 6.683105 | Sequence | PSMs | Proteins | Protein Gr |
|         |          |         |          |      |   |   |   |    |     |          | VAFLGW   | 4        | 1    | 1        |            |
|         |          |         |          |      |   |   |   |    |     |          | VAFLGW   | 15       | 1    | 1        |            |
|         |          |         |          |      |   |   |   |    |     |          | ASGEDAC  | 5        | 1    | 1        |            |
|         |          |         |          |      |   |   |   |    |     |          | VDcGNSI  | 1        | 1    | 1        |            |
|         |          |         |          |      |   |   |   |    |     |          | ASGEDAC  | 1        | 1    | 1        |            |
|         |          |         |          |      |   |   |   |    |     |          | TSHAAPA  | 4        | 1    | 1        |            |
|         |          |         |          |      |   |   |   |    |     |          | ASGEDAC  | 4        | 1    | 1        |            |
|         |          |         |          |      |   |   |   |    |     |          | ASGEDAC  | 1        | 1    | 1        |            |
|         |          |         |          |      |   |   |   |    |     |          | TSHAAPA  | 4        | 1    | 1        |            |
|         |          |         |          |      |   |   |   |    |     |          | aSGEDAC  | 2        | 1    | 1        |            |
|         |          |         |          |      |   |   |   |    |     |          | TAAIcAV  | 1        | 1    | 1        |            |

|         |          |            |          |       |   |    |    |    |     |          |          |          |      |          |            |
|---------|----------|------------|----------|-------|---|----|----|----|-----|----------|----------|----------|------|----------|------------|
| Rv1004c | 15608144 | PROBABI    | 358.4304 | 15.51 | 1 | 2  | 2  | 16 | 419 | 38.76112 | 4.932129 | Sequence | PSMs | Proteins | Protein Gr |
|         |          |            |          |       |   |    |    |    |     |          |          | LAAVLml  | 11   | 1        | 1          |
|         |          |            |          |       |   |    |    |    |     |          |          | VAGGTcS  | 3    | 1        | 1          |
|         |          |            |          |       |   |    |    |    |     |          |          | LAAVLM   | 2    | 1        | 1          |
| Rv1032c | 15608172 | TWO COM    | 3074.361 | 42.24 | 1 | 18 | 18 | 71 | 509 | 54.55741 | 5.77002  | Sequence | PSMs | Proteins | Protein Gr |
|         |          |            |          |       |   |    |    |    |     |          |          | VESLGSL  | 4    | 1        | 1          |
|         |          |            |          |       |   |    |    |    |     |          |          | mTLLVDI  | 3    | 1        | 1          |
|         |          |            |          |       |   |    |    |    |     |          |          | LFVGVSI  | 1    | 1        | 1          |
|         |          |            |          |       |   |    |    |    |     |          |          | TPLAAIQ  | 17   | 1        | 1          |
|         |          |            |          |       |   |    |    |    |     |          |          | VAATAA   | 7    | 1        | 1          |
|         |          |            |          |       |   |    |    |    |     |          |          | VRPGDTI  | 5    | 1        | 1          |
|         |          |            |          |       |   |    |    |    |     |          |          | QDSSDLP  | 5    | 1        | 1          |
|         |          |            |          |       |   |    |    |    |     |          |          | GSVTAES  | 1    | 1        | 1          |
|         |          |            |          |       |   |    |    |    |     |          |          | AIEAQVV  | 4    | 1        | 1          |
|         |          |            |          |       |   |    |    |    |     |          |          | LLDNVD   | 8    | 1        | 1          |
|         |          |            |          |       |   |    |    |    |     |          |          | RVAATA   | 2    | 1        | 1          |
|         |          |            |          |       |   |    |    |    |     |          |          | QFITDAS  | 4    | 1        | 1          |
|         |          |            |          |       |   |    |    |    |     |          |          | mRQFITD  | 3    | 1        | 1          |
|         |          |            |          |       |   |    |    |    |     |          |          | AIEAQVV  | 2    | 1        | 1          |
|         |          |            |          |       |   |    |    |    |     |          |          | TGPNAPc  | 1    | 1        | 1          |
|         |          |            |          |       |   |    |    |    |     |          |          | RmTLLVI  | 1    | 1        | 1          |
|         |          |            |          |       |   |    |    |    |     |          |          | TPLAAIQ  | 1    | 1        | 1          |
|         |          |            |          |       |   |    |    |    |     |          |          | LLDNVD   | 2    | 1        | 1          |
| Rv1352c | 15608492 | hypothetic | 807.5498 | 31.71 | 1 | 2  | 2  | 19 | 123 | 12.84139 | 5.808105 | Sequence | PSMs | Proteins | Protein Gr |
|         |          |            |          |       |   |    |    |    |     |          |          | TEGPSNP  | 11   | 1        | 1          |
|         |          |            |          |       |   |    |    |    |     |          |          | AETGEQF  | 8    | 1        | 1          |
| Rv1418c | 15608556 | PROBABI    | 524.8185 | 23.68 | 1 | 7  | 7  | 15 | 228 | 24.27214 | 8.396973 | Sequence | PSMs | Proteins | Protein Gr |
|         |          |            |          |       |   |    |    |    |     |          |          | APFGQV1  | 2    | 1        | 1          |
|         |          |            |          |       |   |    |    |    |     |          |          | SSGLPTS  | 3    | 1        | 1          |
|         |          |            |          |       |   |    |    |    |     |          |          | DLLLQDC  | 4    | 1        | 1          |
|         |          |            |          |       |   |    |    |    |     |          |          | ARDLLC   | 3    | 1        | 1          |
|         |          |            |          |       |   |    |    |    |     |          |          | ARDLLC   | 1    | 1        | 1          |
|         |          |            |          |       |   |    |    |    |     |          |          | DLLLQDC  | 1    | 1        | 1          |
|         |          |            |          |       |   |    |    |    |     |          |          | VGDSYF1  | 1    | 1        | 1          |
| Rv2261c | 15609398 | hypothetic | 4349.961 | 53.57 | 1 | 4  | 4  | 94 | 140 | 14.93167 | 8.572754 | Sequence | PSMs | Proteins | Protein Gr |
|         |          |            |          |       |   |    |    |    |     |          |          | HAARLG   | 4    | 1        | 1          |

|         |                  |          |       |   |    |    |     |     |          |          |          |      |          |            |
|---------|------------------|----------|-------|---|----|----|-----|-----|----------|----------|----------|------|----------|------------|
|         |                  |          |       |   |    |    |     |     |          |          | AVEAGIP  | 37   | 1        | 1          |
|         |                  |          |       |   |    |    |     |     |          |          | LGAALLV  | 50   | 1        | 1          |
|         |                  |          |       |   |    |    |     |     |          |          | HIAPLISY | 2    | 1        | 1          |
|         |                  |          |       |   |    |    |     |     |          |          | HIAPLISY | 1    | 1        | 1          |
| Rv2318c | 15609455 PROBABI | 161.5461 | 11.82 | 1 | 4  | 4  | 4   | 440 | 46.99369 | 5.592285 | Sequence | PSMs | Proteins | Protein Gr |
|         |                  |          |       |   |    |    |     |     |          |          | TNLVAYS  | 1    | 1        | 1          |
|         |                  |          |       |   |    |    |     |     |          |          | LWDEPIA  | 1    | 1        | 1          |
|         |                  |          |       |   |    |    |     |     |          |          | GVDVTPH  | 1    | 1        | 1          |
|         |                  |          |       |   |    |    |     |     |          |          | GDDDTLI  | 1    | 1        | 1          |
| Rv2914c | 15610051 PROBABI | 2470.296 | 15.21 | 1 | 6  | 6  | 58  | 585 | 61.76624 | 5.846191 | Sequence | PSMs | Proteins | Protein Gr |
|         |                  |          |       |   |    |    |     |     |          |          | DVNPANV  | 9    | 1        | 1          |
|         |                  |          |       |   |    |    |     |     |          |          | ILLADFG  | 29   | 1        | 1          |
|         |                  |          |       |   |    |    |     |     |          |          | GLLRDVS  | 3    | 1        | 1          |
|         |                  |          |       |   |    |    |     |     |          |          | ADQYAL   | 13   | 1        | 1          |
|         |                  |          |       |   |    |    |     |     |          |          | LDGVLSF  | 3    | 1        | 1          |
|         |                  |          |       |   |    |    |     |     |          |          | LDGVLSF  | 1    | 1        | 1          |
| Rv3390c | 15610526 PROBABI | 1132.147 | 27.12 | 1 | 6  | 6  | 33  | 236 | 25.04069 | 7.459473 | Sequence | PSMs | Proteins | Protein Gr |
|         |                  |          |       |   |    |    |     |     |          |          | RDVDSIY  | 2    | 1        | 1          |
|         |                  |          |       |   |    |    |     |     |          |          | DVDSIYS  | 2    | 1        | 1          |
|         |                  |          |       |   |    |    |     |     |          |          | VVITGNP  | 16   | 1        | 1          |
|         |                  |          |       |   |    |    |     |     |          |          | DVDSIYS  | 4    | 1        | 1          |
|         |                  |          |       |   |    |    |     |     |          |          | LVEWDG   | 3    | 1        | 1          |
|         |                  |          |       |   |    |    |     |     |          |          | vVITGNP  | 1    | 1        | 1          |
|         |                  |          |       |   |    |    |     |     |          |          | NSRDSL   | 2    | 1        | 1          |
|         |                  |          |       |   |    |    |     |     |          |          | DSLTTTH  | 3    | 1        | 1          |
| Rv3492c | 15610628 CONSERV | 750.4831 | 40    | 1 | 6  | 6  | 22  | 160 | 17.99545 | 9.378418 | Sequence | PSMs | Proteins | Protein Gr |
|         |                  |          |       |   |    |    |     |     |          |          | SLTAVYF  | 13   | 1        | 1          |
|         |                  |          |       |   |    |    |     |     |          |          | VQTGGEV  | 1    | 1        | 1          |
|         |                  |          |       |   |    |    |     |     |          |          | LAMQEIP  | 2    | 1        | 1          |
|         |                  |          |       |   |    |    |     |     |          |          | sLTAVYP  | 1    | 1        | 1          |
|         |                  |          |       |   |    |    |     |     |          |          | SLTAVYF  | 1    | 1        | 1          |
|         |                  |          |       |   |    |    |     |     |          |          | LAmQEIP  | 2    | 1        | 1          |
|         |                  |          |       |   |    |    |     |     |          |          | SANAQIII | 1    | 1        | 1          |
|         |                  |          |       |   |    |    |     |     |          |          | aLLPKLA  | 1    | 1        | 1          |
| Rv3450c | 15610586 PROBABI | 6806.873 | 54.47 | 1 | 23 | 23 | 169 | 470 | 48.16933 | 6.785645 | Sequence | PSMs | Proteins | Protein Gr |
|         |                  |          |       |   |    |    |     |     |          |          | ASGDEYS  | 22   | 1        | 1          |

|         |          |         |          |       |   |    |    |    |     |          |         |          |      |          |            |
|---------|----------|---------|----------|-------|---|----|----|----|-----|----------|---------|----------|------|----------|------------|
|         |          |         |          |       |   |    |    |    |     |          | AVVDLAI | 15       | 1    | 1        |            |
|         |          |         |          |       |   |    |    |    |     |          | GPALDAV | 6        | 1    | 1        |            |
|         |          |         |          |       |   |    |    |    |     |          | LIAATNA | 3        | 1    | 1        |            |
|         |          |         |          |       |   |    |    |    |     |          | VPHVVAI | 11       | 1    | 1        |            |
|         |          |         |          |       |   |    |    |    |     |          | ASVGLPC | 12       | 1    | 1        |            |
|         |          |         |          |       |   |    |    |    |     |          | aSVGLPG | 1        | 1    | 1        |            |
|         |          |         |          |       |   |    |    |    |     |          | LIAATNA | 2        | 1    | 1        |            |
|         |          |         |          |       |   |    |    |    |     |          | AVTTLcV | 7        | 1    | 1        |            |
|         |          |         |          |       |   |    |    |    |     |          | VAFLAGs | 14       | 1    | 1        |            |
|         |          |         |          |       |   |    |    |    |     |          | LQGRVPI | 1        | 1    | 1        |            |
|         |          |         |          |       |   |    |    |    |     |          | VDDVWF  | 8        | 1    | 1        |            |
|         |          |         |          |       |   |    |    |    |     |          | IGQVAAI | 16       | 1    | 1        |            |
|         |          |         |          |       |   |    |    |    |     |          | RAVVDL  | 3        | 1    | 1        |            |
|         |          |         |          |       |   |    |    |    |     |          | FGDSQGS | 10       | 1    | 1        |            |
|         |          |         |          |       |   |    |    |    |     |          | ESGALYV | 7        | 1    | 1        |            |
|         |          |         |          |       |   |    |    |    |     |          | ITRASGD | 1        | 1    | 1        |            |
|         |          |         |          |       |   |    |    |    |     |          | YLVTDTC | 6        | 1    | 1        |            |
|         |          |         |          |       |   |    |    |    |     |          | VAFLAGs | 10       | 1    | 1        |            |
|         |          |         |          |       |   |    |    |    |     |          | SLSGGGT | 2        | 1    | 1        |            |
|         |          |         |          |       |   |    |    |    |     |          | VAPIVNT | 7        | 1    | 1        |            |
|         |          |         |          |       |   |    |    |    |     |          | vAFLAGs | 1        | 1    | 1        |            |
|         |          |         |          |       |   |    |    |    |     |          | SAYVAAI | 1        | 1    | 1        |            |
|         |          |         |          |       |   |    |    |    |     |          | ESGALYV | 1        | 1    | 1        |            |
|         |          |         |          |       |   |    |    |    |     |          | aVVDLAI | 1        | 1    | 1        |            |
|         |          |         |          |       |   |    |    |    |     |          | ASVGLPC | 1        | 1    | 1        |            |
| Rv3604c | 57117132 | PROBABI | 3246.252 | 44.84 | 1 | 16 | 16 | 99 | 397 | 43.03232 | 7.38623 | Sequence | PSMs | Proteins | Protein Gr |
|         |          |         |          |       |   |    |    |    |     |          |         | DPLTGGC  | 10   | 1        | 1          |
|         |          |         |          |       |   |    |    |    |     |          |         | ALDGESF  | 6    | 1        | 1          |
|         |          |         |          |       |   |    |    |    |     |          |         | DPLTGGC  | 2    | 1        | 1          |
|         |          |         |          |       |   |    |    |    |     |          |         | ARHASP/  | 2    | 1        | 1          |
|         |          |         |          |       |   |    |    |    |     |          |         | HASPADC  | 13   | 1        | 1          |
|         |          |         |          |       |   |    |    |    |     |          |         | DHDIGGS  | 3    | 1        | 1          |
|         |          |         |          |       |   |    |    |    |     |          |         | GGDGASI  | 5    | 1        | 1          |
|         |          |         |          |       |   |    |    |    |     |          |         | HSAEHRI  | 2    | 1        | 1          |
|         |          |         |          |       |   |    |    |    |     |          |         | HYEAPPP  | 16   | 1        | 1          |
|         |          |         |          |       |   |    |    |    |     |          |         | HASPADC  | 15   | 1        | 1          |

|          |          |            |          |       |      |  |     |     |     |     |          |          |          |          |            |             |
|----------|----------|------------|----------|-------|------|--|-----|-----|-----|-----|----------|----------|----------|----------|------------|-------------|
|          |          |            |          |       |      |  |     |     |     |     | TDEASIII | 8        | 1        | 1        |            |             |
|          |          |            |          |       |      |  |     |     |     |     | RELASEL  | 1        | 1        | 1        |            |             |
|          |          |            |          |       |      |  |     |     |     |     | TSLEILFI | 4        | 1        | 1        |            |             |
|          |          |            |          |       |      |  |     |     |     |     | ARHASP   | 3        | 1        | 1        |            |             |
|          |          |            |          |       |      |  |     |     |     |     | DHDIGGS  | 5        | 1        | 1        |            |             |
|          |          |            |          |       |      |  |     |     |     |     | ALDGESF  | 1        | 1        | 1        |            |             |
|          |          |            |          |       |      |  |     |     |     |     | HSAEHRI  | 3        | 1        | 1        |            |             |
| Rv0232,  | 1.6E+07  | PROBABL    | 24815    | 25424 | 39.7 |  | 229 | 5.9 |     |     |          | 1        | 1        | 513.7494 | 1025.484   |             |
|          |          |            |          |       |      |  |     |     |     |     |          | 1        | 1        | 588.2906 | 1174.567   |             |
|          |          |            |          |       |      |  |     |     |     |     |          | 1        | 1        | 690.9078 | 1379.801   |             |
|          |          |            |          |       |      |  |     |     |     |     |          | 1        | 1        | 494.9238 | 1481.75    |             |
|          |          |            |          |       |      |  |     |     |     |     |          | 1        | 1        | 777.3986 | 1552.783   |             |
| Rv1698,  | 15608836 | hypothetic | 6545.136 | 63.06 | 1    |  | 19  | 19  | 162 | 314 | 32.37181 | 5.478027 | Sequence | PSMs     | Proteins   | Protein Gr  |
|          |          |            |          |       |      |  |     |     |     |     |          |          | LSAADNI  | 11       | 1          | 1           |
|          |          |            |          |       |      |  |     |     |     |     |          |          | IGTANAT  | 42       | 1          | 1           |
|          |          |            |          |       |      |  |     |     |     |     |          |          | EKLSAAI  | 4        | 1          | 1           |
|          |          |            |          |       |      |  |     |     |     |     |          |          | TPDAHDI  | 4        | 1          | 1           |
|          |          |            |          |       |      |  |     |     |     |     |          |          | DRIGTAN  | 27       | 1          | 1           |
|          |          |            |          |       |      |  |     |     |     |     |          |          | DTVLAAL  | 5        | 1          | 1           |
|          |          |            |          |       |      |  |     |     |     |     |          |          | SVVNSSI  | 3        | 1          | 1           |
|          |          |            |          |       |      |  |     |     |     |     |          |          | DGSANRI  | 7        | 1          | 1           |
|          |          |            |          |       |      |  |     |     |     |     |          |          | IVGQAGC  | 1        | 1          | 1           |
|          |          |            |          |       |      |  |     |     |     |     |          |          | FAAALAI  | 14       | 1          | 1           |
|          |          |            |          |       |      |  |     |     |     |     |          |          | LVDQGS   | 5        | 1          | 1           |
|          |          |            |          |       |      |  |     |     |     |     |          |          | ETGFITY  | 21       | 1          | 1           |
|          |          |            |          |       |      |  |     |     |     |     |          |          | FAAALAI  | 1        | 1          | 1           |
|          |          |            |          |       |      |  |     |     |     |     |          |          | eKLSAAD  | 1        | 1          | 1           |
|          |          |            |          |       |      |  |     |     |     |     |          |          | DLYTQID  | 4        | 1          | 1           |
|          |          |            |          |       |      |  |     |     |     |     |          |          | DLYTQID  | 7        | 1          | 1           |
|          |          |            |          |       |      |  |     |     |     |     |          |          | SVVNSSI  | 1        | 1          | 1           |
|          |          |            |          |       |      |  |     |     |     |     |          |          | GSGTLLA  | 2        | 1          | 1           |
|          |          |            |          |       |      |  |     |     |     |     |          |          | DTVLAAL  | 1        | 1          | 1           |
|          |          |            |          |       |      |  |     |     |     |     |          |          | GSGTLLA  | 1        | 1          | 1           |
| Rv2945c, | 15610082 | PROBABI    | 1241.392 | 65.67 | 1    |  | 11  | 11  | 24  | 233 | 24.12543 | 5.224121 | Sequence | # PSMs   | # Proteins | # Protein C |
|          |          |            |          |       |      |  |     |     |     |     |          |          | LFDDWSI  | 2        | 1          | 1           |
|          |          |            |          |       |      |  |     |     |     |     |          |          | ASIDLGS  | 2        | 1          | 1           |
|          |          |            |          |       |      |  |     |     |     |     |          |          | TTGKVD   | 3        | 1          | 1           |



| Sample                   | Protein  | Score | Length | Mod | Count | Score | Score | Score    | Score    | Sequence | # PSMs | # Proteins | # Protein C |
|--------------------------|----------|-------|--------|-----|-------|-------|-------|----------|----------|----------|--------|------------|-------------|
| Rv0286, 57116716 PPE FAM | 1789.282 | 20.86 | 1      | 8   | 8     | 33    | 513   | 51.75526 | 5.592285 | VDSLLGI  | 1      | 1          | 1           |
|                          |          |       |        |     |       |       |       |          |          | VQGDNIS  | 1      | 1          | 1           |
|                          |          |       |        |     |       |       |       |          |          | VLDPAAC  | 6      | 1          | 1           |
|                          |          |       |        |     |       |       |       |          |          | SARPATV  | 2      | 1          | 1           |
|                          |          |       |        |     |       |       |       |          |          | GLTSVHV  | 2      | 1          | 1           |
|                          |          |       |        |     |       |       |       |          |          | GVcTYNI  | 1      | 1          | 1           |
|                          |          |       |        |     |       |       |       |          |          | ASIDLGS  | 2      | 1          | 1           |
|                          |          |       |        |     |       |       |       |          |          | QSLDATK  | 1      | 1          | 1           |
|                          |          |       |        |     |       |       |       |          |          | vQGDNIS  | 1      | 1          | 1           |
|                          |          |       |        |     |       |       |       |          |          | DYGDEFI  | 7      | 1          | 1           |
|                          |          |       |        |     |       |       |       |          |          | SELRDYC  | 6      | 1          | 1           |
|                          |          |       |        |     |       |       |       |          |          | DYGDEFI  | 1      | 1          | 1           |
|                          |          |       |        |     |       |       |       |          |          | mPmVPG   | 5      | 1          | 1           |
|                          |          |       |        |     |       |       |       |          |          | RSELRDY  | 3      | 1          | 1           |
|                          |          |       |        |     |       |       |       |          |          | GAGTLGI  | 2      | 1          | 1           |
|                          |          |       |        |     |       |       |       |          |          | APAATVI  | 3      | 1          | 1           |
| AVGLTAI                  | 2        | 1     | 1      |     |       |       |       |          |          |          |        |            |             |
| mPMVPG                   | 1        | 1     | 1      |     |       |       |       |          |          |          |        |            |             |
| GGIKAPA                  | 3        | 1     | 1      |     |       |       |       |          |          |          |        |            |             |

| Protein  | Group     | Modification | $\Delta Cn$ | q-Value | PEP | IonScore | Exp Value | Charge   | MH+ [Da] | $\Delta M$ [ppm] | RT [min] | Missed Cleavages |   |
|----------|-----------|--------------|-------------|---------|-----|----------|-----------|----------|----------|------------------|----------|------------------|---|
| 15607703 |           |              |             | 0       | 0   | 0.01907  | 89        | 1.83E-09 | 2        | 1494.7826        | 0.94266  | 23.31285         | 0 |
| 15607703 | C5(Carban |              |             | 0       | 0   | 0.06839  | 72.15     | 1.01E-07 | 2        | 1335.6513        | 0.346959 | 24.25277         | 0 |
| 15607703 | M2(Oxidat |              |             | 0       | 0   | 0.1275   | 67.55     | 1.75E-07 | 2        | 1931.9086        | -0.88222 | 23.58878         | 0 |
| 15607703 | M10(Oxid: |              |             | 0       | 0   | 0.06282  | 64.47     | 4.47E-07 | 2        | 1353.6578        | -0.19492 | 16.35472         | 0 |
| 15607703 |           |              |             | 0       | 0   | 0.05142  | 59.86     | 2.22E-06 | 2        | 1667.8395        | 0.41601  | 29.37524         | 0 |
| 15607703 | M15(Oxid: |              |             | 0       | 0   | 0.04419  | 59.07     | 1.36E-06 | 2        | 1915.9131        | -1.18626 | 24.74454         | 0 |
| 15607245 | M6(Oxidat |              |             | 0       | 0   | 2.41E-10 | 105.55    | 2.78E-11 | 2        | 1526.675         | -0.72703 | 26.40491         | 0 |
| 15607245 | C15(Carba |              |             | 0       | 0   | 6.07E-14 | 95.88     | 4.78E-10 | 2        | 2048.0037        | -0.13457 | 38.57365         | 0 |
| 15607245 | C8(Carban |              |             | 0       | 0   | 1.43E-05 | 87.05     | 1.97E-09 | 2        | 1510.6819        | 0.505113 | 29.54958         | 0 |
| 15607245 | C10(Carba |              |             | 0       | 0   | 4.35E-08 | 86.32     | 2.92E-09 | 2        | 1779.8663        | -0.05661 | 31.18058         | 1 |
| 15607245 |           |              |             | 0       | 0   | 0.000581 | 65.84     | 3.78E-07 | 2        | 865.45201        | -0.77228 | 22.50983         | 0 |
| 15607245 | M8(Oxidat |              |             | 0       | 0   | 8.13E-06 | 63.02     | 5.99E-07 | 3        | 1795.864         | 1.510409 | 29.04548         | 1 |
| 15607245 | N-Term(A  |              |             | 0       | 0   | 0.02377  | 62.95     | 7.6E-07  | 2        | 907.46251        | -0.81031 | 22.13195         | 0 |
| 15607245 | M9(Oxidat |              |             | 0       | 0   | 5.19E-06 | 54.5      | 5.68E-06 | 2        | 2063.9949        | -1.92813 | 36.30444         | 0 |
| 15607245 |           |              |             | 0       | 0   | 5.42E-06 | 42.25     | 0.00011  | 2        | 1397.7386        | 0.122834 | 25.35389         | 0 |
| 57116880 | C14(Carba |              |             | 0       | 0   | 2.7E-06  | 81.57     | 6.95E-09 | 2        | 2004.9241        | -1.60377 | 36.73657         | 0 |
| 57116880 |           |              |             | 0       | 0   | 2.1E-08  | 78.12     | 3.7E-08  | 2        | 2245.1456        | 2.424837 | 47.85494         | 0 |
| 57116880 |           |              |             | 0       | 0   | 0.01251  | 71        | 2.22E-07 | 3        | 2678.3507        | 1.1947   | 39.53598         | 1 |
| 57116880 | C1(Carban |              |             | 0       | 0   | 0.000169 | 45.47     | 2.83E-05 | 2        | 1295.5448        | 1.120844 | 13.13315         | 0 |

|          |           |   |   |          |        |          |   |           |          |          |   |
|----------|-----------|---|---|----------|--------|----------|---|-----------|----------|----------|---|
| 57116880 | M6(Oxidat | 0 | 0 | 0.1283   | 44.53  | 3.52E-05 | 2 | 994.4395  | -1.64472 | 13.57728 | 0 |
| 57116880 | C5(Carban | 0 | 0 | 0.00189  | 44.53  | 3.52E-05 | 3 | 1694.7281 | -1.17647 | 13.51114 | 1 |
| 57116880 |           | 0 | 0 | 0.2392   | 39.26  | 0.000118 | 2 | 978.44866 | 2.488324 | 16.74608 | 0 |
| 57116880 | M6(Oxidat | 0 | 0 | 0.1947   | 25.74  | 0.002661 | 3 | 1692.7897 | -0.86207 | 17.33233 | 1 |
| 15607431 |           | 0 | 0 | 0.008752 | 58.6   | 1.45E-06 | 2 | 1453.8072 | -0.84247 | 35.28685 | 0 |
| 15607431 | M4(Oxidat | 0 | 0 | 0.001917 | 56.92  | 4.27E-06 | 2 | 1469.8045 | 0.799193 | 34.31469 | 0 |
| 15607431 |           | 0 | 0 | 0.01078  | 56.59  | 5.04E-06 | 2 | 844.48888 | 0.162069 | 21.31163 | 0 |
| 15607431 |           | 0 | 0 | 0.2531   | 43.38  | 4.59E-05 | 2 | 925.54637 | -0.23556 | 25.39624 | 0 |
| 15607431 |           | 0 | 0 | 0.1097   | 40.2   | 9.53E-05 | 3 | 2360.3364 | -0.31877 | 41.14003 | 1 |
| 15607431 | M4(Oxidat | 0 | 0 | 0.04108  | 30.41  | 0.000908 | 3 | 2376.3334 | 0.564683 | 39.74559 | 1 |
| 15607431 | M12(Oxid. | 0 | 0 | 0.2876   | 24.5   | 0.0055   | 3 | 2295.2741 | -0.05851 | 35.62276 | 1 |
| 15608503 |           | 0 | 0 | 0.006579 | 87.18  | 4.4E-09  | 3 | 2942.4924 | 1.183846 | 48.33012 | 0 |
| 15608503 |           | 0 | 0 | 0.03816  | 74.59  | 5.56E-08 | 2 | 1466.7317 | 0.597077 | 32.64097 | 0 |
| 15608503 |           | 0 | 0 | 0.1925   | 62.91  | 6.4E-07  | 2 | 1110.5418 | -0.75247 | 20.83257 | 0 |
| 15608503 |           | 0 | 0 | 0.2386   | 58.3   | 3.11E-06 | 2 | 777.42485 | -0.73192 | 15.91541 | 0 |
| 15608503 |           | 0 | 0 | 0.269    | 56.5   | 2.23E-06 | 3 | 1899.8824 | -0.45946 | 30.23489 | 1 |
| 15608503 |           | 0 | 0 | 0.1428   | 47.13  | 2.81E-05 | 2 | 1244.6247 | 1.333806 | 16.18294 | 1 |
| 15608503 | N-Term(A  | 0 | 0 | 0.271    | 34.66  | 0.000513 | 2 | 1152.5579 | 4.088842 | 23.18801 | 0 |
| 15608503 |           | 0 | 0 | 0.3186   | 27.55  | 0.001754 | 2 | 808.3579  | -0.67369 | 13.74754 | 0 |
| 15608109 |           | 0 | 0 | 9.56E-05 | 112.17 | 1.21E-11 | 2 | 1498.8583 | -0.35182 | 48.92715 | 0 |
| 15608109 |           | 0 | 0 | 0.01648  | 108.03 | 2.83E-11 | 2 | 1456.8127 | 0.527432 | 31.21349 | 0 |
| 15608109 | M7(Oxidat | 0 | 0 | 0.02595  | 106.37 | 2.54E-11 | 2 | 1777.8543 | 0.995214 | 25.44923 | 0 |
| 15608109 |           | 0 | 0 | 0.03949  | 91.33  | 1.18E-09 | 2 | 1761.8582 | 0.335212 | 28.89771 | 0 |
| 15608109 |           | 0 | 0 | 0.1032   | 71.74  | 1.44E-07 | 2 | 1157.5795 | -0.21245 | 20.21351 | 0 |
| 15608109 |           | 0 | 0 | 0.05874  | 61.46  | 1.25E-06 | 3 | 2425.302  | -1.08242 | 44.95697 | 1 |
| 15608109 |           | 0 | 0 | 0.1934   | 57.26  | 2.07E-06 | 2 | 2705.4776 | 2.016413 | 41.89345 | 0 |
| 15608109 |           | 0 | 0 | 0.1473   | 46.3   | 5.51E-05 | 3 | 1823.9698 | 4.742082 | 23.31755 | 1 |
| 15608109 | N-Term(A  | 0 | 0 | 0.2119   | 22.54  | 0.010029 | 3 | 1865.9853 | 7.314302 | 22.59772 | 1 |
| 15608285 |           | 0 | 0 | 8.21E-05 | 100.91 | 1.26E-10 | 2 | 1639.8846 | 0.523075 | 30.19015 | 0 |
| 15608285 | M1(Oxidat | 0 | 0 | 0.00566  | 97.86  | 4.17E-10 | 2 | 1655.8801 | 0.861283 | 27.30072 | 0 |
| 15608285 | M6(Oxidat | 0 | 0 | 0.001339 | 87.02  | 1.98E-09 | 2 | 1383.6319 | -0.23327 | 19.71933 | 0 |
| 15608285 |           | 0 | 0 | 0.001627 | 82.23  | 5.97E-09 | 2 | 1367.6375 | 0.1517   | 22.61759 | 0 |
| 15608285 |           | 0 | 0 | 0.02593  | 75.05  | 3.12E-08 | 3 | 2891.3296 | 1.111148 | 19.88149 | 1 |
| 15608285 |           | 0 | 0 | 0.1671   | 65     | 7.91E-07 | 2 | 1229.6736 | -0.02417 | 33.49288 | 0 |
| 15608285 |           | 0 | 0 | 0.1092   | 63.11  | 4.87E-07 | 2 | 928.58269 | 0.051584 | 27.49772 | 0 |
| 15608285 |           | 0 | 0 | 0.01064  | 61.17  | 7.62E-07 | 3 | 2263.9923 | -0.00335 | 21.43929 | 0 |

|          |           |   |   |          |        |          |   |           |          |          |   |
|----------|-----------|---|---|----------|--------|----------|---|-----------|----------|----------|---|
| 15608285 |           | 0 | 0 | 0.005337 | 59.59  | 2.14E-06 | 2 | 2800.4405 | 0.002138 | 41.01152 | 0 |
| 15608285 |           | 0 | 0 | 0.1188   | 57.6   | 2.78E-06 | 2 | 888.50365 | -0.08174 | 22.6037  | 0 |
| 15608285 | N-Term(A  | 0 | 0 | 0.1244   | 53.68  | 1.14E-05 | 2 | 1271.6834 | -0.65196 | 38.63725 | 0 |
| 15608285 |           | 0 | 0 | 0.02854  | 42.65  | 0.000166 | 2 | 1385.7743 | -0.31875 | 31.67197 | 1 |
| 15608285 | N-Term(A  | 0 | 0 | 0.1766   | 41.15  | 7.66E-05 | 2 | 1409.6493 | 1.052241 | 24.35111 | 0 |
| 15608285 |           | 0 | 0 | 0.07438  | 38.15  | 0.000306 | 3 | 2956.5406 | -0.32767 | 38.90236 | 1 |
| 15608773 |           | 0 | 0 | 0.05934  | 83.48  | 6.28E-09 | 2 | 1984.9529 | -0.86291 | 29.50758 | 0 |
| 15608773 | M10(Oxid  | 0 | 0 | 0.1288   | 74.75  | 3.35E-08 | 2 | 2000.9474 | -1.06    | 26.59221 | 0 |
| 15608773 |           | 0 | 0 | 0.1314   | 70.98  | 1.12E-07 | 2 | 2228.0772 | 0.284881 | 28.62312 | 1 |
| 15608773 |           | 0 | 0 | 0.1242   | 64.05  | 7.87E-07 | 2 | 1434.7574 | -0.98238 | 25.58994 | 1 |
| 15608773 | C1(Carban | 0 | 0 | 0.1694   | 47.44  | 4.15E-05 | 2 | 1231.6287 | 2.804748 | 30.86971 | 0 |
| 15608773 |           | 0 | 0 | 0.2619   | 41.41  | 0.000192 | 2 | 831.45812 | 1.220923 | 24.28398 | 0 |
| 15608773 |           | 0 | 0 | 0.3465   | 39.19  | 0.000175 | 2 | 1186.706  | 0.344581 | 24.64872 | 0 |
| 15608773 |           | 0 | 0 | 0.222    | 37.5   | 0.000365 | 2 | 1321.6703 | 1.153377 | 27.25954 | 0 |
| 15608773 |           | 0 | 0 | 0.1617   | 34.33  | 0.001015 | 3 | 1602.8417 | -0.66279 | 34.1673  | 1 |
| 15608773 |           | 0 | 0 | 0.2904   | 30.69  | 0.001493 | 2 | 1483.8044 | -0.87775 | 34.07757 | 1 |
| 15607453 | M16(Oxid  | 0 | 0 | 4.13E-08 | 66.07  | 2.6E-07  | 3 | 2622.448  | 1.630499 | 33.59362 | 0 |
| 15607648 |           | 0 | 0 | 0.000174 | 108.95 | 1.27E-11 | 3 | 2594.2042 | 0.857855 | 34.28595 | 0 |
| 15607648 |           | 0 | 0 | 0.001804 | 104.22 | 6.24E-11 | 2 | 1861.8958 | 1.642547 | 24.43988 | 0 |
| 15607648 |           | 0 | 0 | 0.004252 | 95.29  | 3.7E-10  | 3 | 3142.5062 | -0.49725 | 48.78731 | 0 |
| 15607648 |           | 0 | 0 | 0.001608 | 93.62  | 6.95E-10 | 2 | 1799.8945 | -0.697   | 24.98661 | 0 |
| 15607648 | M6(Oxidat | 0 | 0 | 0.01621  | 88.26  | 2.46E-09 | 2 | 1815.8897 | -0.51229 | 21.79304 | 0 |
| 15607648 |           | 0 | 0 | 0.01177  | 86.96  | 3.93E-09 | 3 | 2639.3155 | 2.058706 | 42.90119 | 0 |
| 15607648 | N-Term(A  | 0 | 0 | 0.00505  | 71.33  | 1.51E-07 | 3 | 2681.3194 | -0.47969 | 45.05091 | 0 |
| 15607648 |           | 0 | 0 | 0.02951  | 57.75  | 2.6E-06  | 2 | 1415.7095 | -0.38217 | 17.30333 | 0 |
| 15607648 | M6(Oxidat | 0 | 0 | 0.03918  | 54.2   | 1.1E-05  | 3 | 1971.9887 | -1.52316 | 20.31268 | 1 |
| 15607648 |           | 0 | 0 | 0.03596  | 52.36  | 1.39E-05 | 3 | 1955.9994 | 1.32541  | 23.29268 | 1 |
| 15607648 | N-Term(A  | 0 | 0 | 0.1357   | 39.04  | 0.000143 | 3 | 3316.5707 | -5.96685 | 28.12003 | 1 |
| 15607648 | M6(Oxidat | 0 | 0 | 0.217    | 38.94  | 0.000127 | 2 | 947.42845 | -0.7525  | 21.58042 | 0 |
| 15607648 | M2(Oxidat | 0 | 0 | 0.2313   | 36.69  | 0.000311 | 2 | 1431.7039 | -0.74825 | 18.09913 | 0 |
| 15607648 |           | 0 | 0 | 0.3513   | 34.64  | 0.000378 | 2 | 931.43419 | -0.0651  | 27.08523 | 0 |
| 15607648 | N-Term(A  | 0 | 0 | 0.008968 | 26.63  | 0.002168 | 3 | 2636.2102 | -0.87135 | 33.26372 | 0 |
| 15607648 | N-Term(A  | 0 | 0 | 0.3031   | 19.3   | 0.011721 | 2 | 973.4456  | 0.809433 | 29.5941  | 0 |
| 15607648 | N-Term(A  | 0 | 0 | 0.3035   | 11.66  | 0.068072 | 2 | 989.44084 | 1.124066 | 24.75548 | 0 |
| 15608695 | M4(Oxidat | 0 | 0 | 0.1869   | 108.86 | 2.86E-11 | 2 | 1813.917  | 0.906043 | 31.74168 | 0 |

|          |           |   |   |          |        |          |   |           |          |          |   |
|----------|-----------|---|---|----------|--------|----------|---|-----------|----------|----------|---|
| 15608695 |           | 0 | 0 | 0.256    | 86.53  | 5.34E-09 | 2 | 2664.3631 | 0.571772 | 45.85352 | 0 |
| 15608695 | M27(Oxid: | 0 | 0 | 0.2964   | 77.06  | 3.44E-08 | 4 | 3576.7262 | -2.47693 | 48.71369 | 0 |
| 15608695 | M1(Oxidat | 0 | 0 | 0.032124 | 70.94  | 1.61E-07 | 3 | 2347.1577 | -0.94042 | 25.4547  | 0 |
| 15608695 |           | 0 | 0 | 0.3907   | 66.61  | 2.18E-07 | 3 | 2501.4096 | 0.367707 | 41.0072  | 0 |
| 15608695 |           | 0 | 0 | 0.317    | 62.05  | 1.19E-06 | 3 | 2331.1648 | -0.11722 | 28.89189 | 0 |
| 15608695 |           | 0 | 0 | 0.1813   | 59.53  | 1.45E-06 | 2 | 1148.6427 | 0.388714 | 25.76562 | 1 |
| 15608695 |           | 0 | 0 | 0.1979   | 45.64  | 2.72E-05 | 3 | 2286.9944 | 0.221959 | 37.03144 | 0 |
| 15607149 |           | 0 | 0 | 0.102925 | 80.07  | 1.62E-08 | 2 | 1571.8547 | 0.350259 | 25.82309 | 0 |
| 15607149 |           | 0 | 0 | 0.232    | 52.91  | 1.02E-05 | 3 | 1958.9833 | 0.03023  | 25.39747 | 1 |
| 15607149 |           | 0 | 0 | 0.3465   | 50.96  | 8E-06    | 2 | 1185.5495 | -0.03815 | 20.17569 | 0 |
| 15607149 |           | 0 | 0 | 0.312    | 49.71  | 3.42E-05 | 3 | 1859.9569 | -0.8     | 13.61221 | 1 |
| 15607149 |           | 0 | 0 | 0.2237   | 48.43  | 1.43E-05 | 3 | 1665.7765 | -1.34945 | 14.288   | 1 |
| 15607149 |           | 0 | 0 | 0.3672   | 45.87  | 4.4E-05  | 2 | 1348.6619 | -1.91929 | 24.89264 | 0 |
| 15607149 |           | 0 | 0 | 0.2882   | 36.49  | 0.000236 | 3 | 2310.0912 | -0.84917 | 13.64848 | 1 |
| 15607149 |           | 0 | 0 | 0.3094   | 34.24  | 0.000735 | 4 | 2762.3383 | -1.60507 | 13.91267 | 2 |
| 15607149 |           | 0 | 0 | 0.5341   | 25.64  | 0.004776 | 2 | 1407.7092 | 0.222165 | 13.36044 | 0 |
| 15608127 |           | 0 | 0 | 5.77E-16 | 124.22 | 8.7E-13  | 2 | 2327.2068 | 0.138968 | 45.3158  | 0 |
| 15608127 |           | 0 | 0 | 5.77E-16 | 104.15 | 6.73E-11 | 2 | 1829.9755 | -0.08734 | 36.10377 | 0 |
| 15608127 |           | 0 | 0 | 5.77E-16 | 97.06  | 1.96E-10 | 2 | 1805.7986 | -0.01646 | 36.88976 | 0 |
| 15608127 | M5(Oxidat | 0 | 0 | 5.77E-16 | 90.72  | 8.45E-10 | 2 | 1821.7947 | 0.630715 | 33.85423 | 0 |
| 15608127 |           | 0 | 0 | 5.77E-16 | 88.63  | 3.15E-09 | 2 | 1893.9478 | -0.86581 | 33.23999 | 0 |
| 15608127 | M18(Oxid: | 0 | 0 | 5.22E-08 | 75.98  | 7.57E-08 | 2 | 2343.2034 | 0.849452 | 42.65127 | 0 |
| 15608127 | M2(Oxidat | 0 | 0 | 5.77E-16 | 75.78  | 2.64E-08 | 2 | 1837.7887 | 0.137441 | 32.60723 | 0 |
| 15608127 |           | 0 | 0 | 5.77E-16 | 75.43  | 5.16E-08 | 2 | 1795.9915 | 0.10099  | 28.00924 | 1 |
| 15608127 | N-Term(A  | 0 | 0 | 5.77E-16 | 75.42  | 5.74E-08 | 2 | 1872.0037 | 9.334067 | 34.19954 | 0 |
| 15608127 |           | 0 | 0 | 5.77E-16 | 72.51  | 9.26E-08 | 2 | 1164.6255 | -0.38246 | 30.54485 | 0 |
| 15608127 |           | 0 | 0 | 5.77E-16 | 70.09  | 1.71E-07 | 2 | 2211.1866 | -0.10866 | 38.60327 | 0 |
| 15608127 | N-Term(A  | 0 | 0 | 1.77E-13 | 66.2   | 4.2E-07  | 2 | 1935.9516 | -4.3496  | 38.09665 | 0 |
| 15608127 |           | 0 | 0 | 5.77E-16 | 54.62  | 9.84E-06 | 2 | 2050.0462 | -2.13221 | 33.62959 | 1 |
| 15608127 |           | 0 | 0 | 5.77E-16 | 48.78  | 2.19E-05 | 3 | 1986.076  | -0.41761 | 29.57991 | 1 |
| 15608127 | N-Term(A  | 0 | 0 | 5.77E-16 | 47.6   | 1.73E-05 | 2 | 1847.8093 | 0.013746 | 42.56609 | 0 |
| 15608127 |           | 0 | 0 | 2.52E-06 | 43.63  | 9.1E-05  | 2 | 1560.7803 | 0.236892 | 20.58624 | 1 |
| 15608127 |           | 0 | 0 | 4.01E-08 | 39.45  | 0.00021  | 2 | 850.44109 | -0.81565 | 21.20377 | 0 |
| 15608127 |           | 0 | 0 | 0.218    | 35.15  | 0.000916 | 3 | 1645.8645 | -0.7201  | 26.84481 | 1 |
| 15608127 |           | 0 | 0 | 8.69E-16 | 33.5   | 0.000446 | 2 | 1051.6514 | 0.345634 | 28.56652 | 0 |
| 15608127 |           | 0 | 0 | 3.38E-12 | 28.11  | 0.001542 | 2 | 1137.685  | -0.15574 | 19.22783 | 1 |

|          |           |   |   |          |       |          |   |           |          |          |   |
|----------|-----------|---|---|----------|-------|----------|---|-----------|----------|----------|---|
| 15608638 | C12(Carba | 0 | 0 | 0.05248  | 92.51 | 1.32E-09 | 2 | 1602.8051 | -0.41427 | 27.71187 | 0 |
| 15608638 | N-Term(A  | 0 | 0 | 0.02941  | 75.39 | 7.23E-08 | 2 | 2049.0408 | -1.27924 | 34.49973 | 0 |
| 15608638 | C6(Carban | 0 | 0 | 0.03478  | 73.22 | 9.53E-08 | 2 | 2007.0312 | -0.84691 | 29.19685 | 0 |
| 15608638 |           | 0 | 0 | 0.1771   | 55.26 | 7.6E-06  | 2 | 1131.6069 | 0.917123 | 22.5728  | 1 |
| 15608638 | M2(Oxidat | 0 | 0 | 0.126    | 53.69 | 4.28E-06 | 2 | 984.48131 | -0.63637 | 20.41186 | 0 |
| 15608638 |           | 0 | 0 | 0.1416   | 52.04 | 7.5E-06  | 2 | 968.48717 | 0.152693 | 22.80557 | 0 |
| 15608638 |           | 0 | 0 | 0.2722   | 44.7  | 8.13E-05 | 3 | 1945.9922 | 0.426167 | 30.46861 | 1 |
| 15608638 |           | 0 | 0 | 0.2218   | 44.19 | 4.38E-05 | 2 | 946.46337 | 0.500991 | 20.26287 | 0 |
| 15608638 | M2(Oxidat | 0 | 0 | 0.3134   | 36.3  | 0.000445 | 3 | 1961.9879 | 0.836833 | 28.35243 | 1 |
| 15608638 |           | 0 | 0 | 0.2832   | 35.77 | 0.000305 | 2 | 841.47856 | -0.73451 | 19.55968 | 0 |
| 15608638 |           | 0 | 0 | 0.294    | 35.73 | 0.000267 | 2 | 996.52117 | -0.98898 | 13.0297  | 0 |
| 15607253 |           | 0 | 0 | 3.51E-13 | 87.14 | 3.19E-09 | 2 | 1295.7341 | 1.701806 | 45.40763 | 0 |
| 15607253 |           | 0 | 0 | 1.81E-09 | 85.65 | 3.68E-09 | 2 | 1059.6159 | 0.142528 | 49.11643 | 0 |
| 15607253 |           | 0 | 0 | 5.51E-09 | 71.23 | 7.52E-08 | 2 | 2247.0828 | -0.08012 | 48.31967 | 0 |
| 15607253 |           | 0 | 0 | 1.09E-09 | 68.35 | 2.05E-07 | 2 | 1269.6427 | -0.52259 | 18.72517 | 0 |
| 15607253 |           | 0 | 0 | 1.83E-06 | 64.8  | 5.13E-07 | 2 | 2735.4393 | 1.032844 | 32.49275 | 0 |
| 15607253 |           | 0 | 0 | 1.03E-08 | 63.79 | 8.15E-07 | 3 | 2137.1534 | 0.927947 | 34.4451  | 1 |
| 15607253 | M20(Oxid: | 0 | 0 | 1.58E-10 | 58.83 | 2.16E-06 | 5 | 3420.6889 | 1.56833  | 45.42059 | 0 |
| 15607253 | C9(Carban | 0 | 0 | 3.51E-05 | 57.71 | 4.15E-06 | 2 | 1516.7927 | -0.97255 | 27.75471 | 0 |
| 15607253 |           | 0 | 0 | 1.46E-05 | 56.96 | 3.73E-06 | 2 | 1107.5798 | 0.38662  | 22.05099 | 0 |
| 15607253 |           | 0 | 0 | 8.07E-10 | 54.21 | 6.07E-06 | 4 | 3404.6911 | 0.713558 | 46.2618  | 0 |
| 15607253 | M2(Oxidat | 0 | 0 | 3.32E-05 | 52.68 | 6.47E-06 | 2 | 1168.6019 | -1.07997 | 21.87608 | 0 |
| 15607253 | N-Term(A  | 0 | 0 | 2.62E-05 | 45.73 | 6.28E-05 | 2 | 1101.6285 | 1.960069 | 26.23085 | 0 |
| 15607253 |           | 0 | 0 | 0.004726 | 42.35 | 0.000148 | 2 | 1681.8621 | -2.13047 | 26.1797  | 1 |
| 15607253 |           | 0 | 0 | 0.04156  | 40.63 | 0.000182 | 2 | 860.43761 | 0.287451 | 18.27145 | 0 |
| 15607253 | C3(Carban | 0 | 0 | 0.03432  | 39.52 | 0.000111 | 2 | 1061.4458 | -1.05226 | 20.039   | 0 |
| 15607253 |           | 0 | 0 | 0.02434  | 38.84 | 0.000202 | 2 | 1360.6591 | -1.00399 | 19.64368 | 1 |
| 15607253 |           | 0 | 0 | 0.003386 | 37.96 | 0.00024  | 2 | 1152.6081 | -0.10539 | 23.69952 | 0 |
| 15607253 |           | 0 | 0 | 0.1327   | 34.7  | 0.000338 | 2 | 1146.542  | -0.50719 | 17.89633 | 0 |
| 15608607 |           | 0 | 0 | 6.54E-09 | 94.47 | 7.15E-10 | 2 | 1891.0009 | -1.26346 | 29.534   | 0 |
| 15608607 |           | 0 | 0 | 0.000327 | 91.44 | 1.51E-09 | 3 | 2545.2956 | 0.587796 | 49.53649 | 0 |
| 15608607 |           | 0 | 0 | 2.52E-05 | 89.46 | 2.15E-09 | 2 | 1145.6414 | 0.099264 | 26.39224 | 0 |
| 15608607 | M22(Oxid: | 0 | 0 | 3.46E-09 | 78.96 | 2.8E-08  | 3 | 2561.2974 | 3.260509 | 26.8915  | 0 |
| 15608607 |           | 0 | 0 | 2.47E-08 | 77.77 | 2.84E-08 | 3 | 2047.1034 | -0.5103  | 27.95141 | 1 |
| 15608607 | C5(Carban | 0 | 0 | 0.0191   | 59.51 | 1.68E-06 | 3 | 2643.297  | -0.58454 | 34.51533 | 0 |
| 15608607 |           | 0 | 0 | 0.007128 | 59.15 | 1.34E-06 | 2 | 1536.8378 | -0.19855 | 27.51356 | 0 |

|          |           |   |   |          |        |          |   |           |          |          |   |
|----------|-----------|---|---|----------|--------|----------|---|-----------|----------|----------|---|
| 15608607 |           | 0 | 0 | 0.02891  | 54.99  | 8.24E-06 | 2 | 845.44695 | -0.7739  | 16.93503 | 0 |
| 15608607 |           | 0 | 0 | 0.000158 | 50.03  | 9.91E-06 | 2 | 1451.8569 | -0.86935 | 25.07432 | 1 |
| 15608607 |           | 0 | 0 | 0.00924  | 44.11  | 4.08E-05 | 3 | 1340.7795 | -0.22164 | 24.68926 | 2 |
| 15608607 |           | 0 | 0 | 0.04722  | 34.47  | 0.000356 | 2 | 869.50835 | -0.91192 | 21.0811  | 0 |
| 15608607 |           | 0 | 0 | 0.01879  | 34.39  | 0.000363 | 2 | 922.58214 | -1.28055 | 18.98703 | 1 |
| 15608379 | M19(Oxid  | 0 | 0 | 0.01907  | 104.26 | 3.74E-11 | 4 | 3247.518  | 0.196686 | 42.57415 | 0 |
| 15608379 |           | 0 | 0 | 0.1478   | 71.21  | 7.55E-08 | 4 | 3231.5158 | -2.05585 | 47.11509 | 0 |
| 15608379 |           | 0 | 0 | 0.1222   | 68.84  | 1.3E-07  | 2 | 1209.5162 | -1.01728 | 20.90842 | 0 |
| 15608379 |           | 0 | 0 | 0.2019   | 68.67  | 2.17E-07 | 2 | 1094.591  | -0.47627 | 32.38235 | 0 |
| 15608379 | M5(Oxidat | 0 | 0 | 0.3362   | 65.59  | 4.42E-07 | 2 | 1110.5856 | -0.72701 | 29.1327  | 0 |
| 15608379 |           | 0 | 0 | 0.1437   | 61.67  | 1.57E-06 | 2 | 1583.8541 | -0.0125  | 25.64875 | 0 |
| 15608379 |           | 0 | 0 | 0.1838   | 61.64  | 6.84E-07 | 2 | 1083.4885 | -0.35107 | 20.25053 | 0 |
| 15608379 | C1(Carban | 0 | 0 | 0.2125   | 60.34  | 1.43E-06 | 2 | 1292.6414 | -0.17815 | 29.06561 | 0 |
| 15608379 | M3(Oxidat | 0 | 0 | 0.2586   | 58.09  | 1.55E-06 | 2 | 1225.5108 | -1.23745 | 16.71841 | 0 |
| 15608379 |           | 0 | 0 | 0.3251   | 53.75  | 8.43E-06 | 2 | 1240.6851 | 2.1721   | 37.88959 | 0 |
| 15608379 |           | 0 | 0 | 0.2665   | 52.72  | 7.22E-06 | 2 | 1177.57   | -0.77907 | 15.55598 | 0 |
| 15608379 | M22(Oxid  | 0 | 0 | 0.232    | 41.37  | 9.12E-05 | 4 | 3679.7716 | 1.573699 | 41.55376 | 1 |
| 15608379 |           | 0 | 0 | 0.3604   | 41.25  | 0.000109 | 2 | 928.48876 | 0.048245 | 22.49563 | 0 |
| 15608379 |           | 0 | 0 | 0.3291   | 36.98  | 0.000261 | 3 | 1323.7405 | -1.16312 | 24.28651 | 1 |
| 15608379 | C2(Carban | 0 | 0 | 0.4346   | 32.63  | 0.00131  | 2 | 1448.7416 | -0.78037 | 27.60532 | 1 |
| 15608379 |           | 0 | 0 | 0.3111   | 31.38  | 0.001019 | 2 | 835.46843 | 1.388548 | 26.82545 | 0 |
| 15608379 |           | 0 | 0 | 0.4241   | 29.63  | 0.001086 | 3 | 1344.8133 | -0.32993 | 35.29193 | 1 |
| 15608921 |           | 0 | 0 | 5.79E-07 | 108.99 | 2.08E-11 | 2 | 1438.6966 | 0.263782 | 43.79205 | 0 |
| 15608921 |           | 0 | 0 | 0.000215 | 80.13  | 9.68E-09 | 2 | 1687.6861 | -0.24207 | 20.56764 | 0 |
| 15608921 |           | 0 | 0 | 9.26E-14 | 77.65  | 3.69E-08 | 2 | 1791.9277 | -0.74858 | 30.28371 | 0 |
| 15608921 | M10(Oxid  | 0 | 0 | 0.000218 | 73.51  | 4.45E-08 | 2 | 1703.68   | -0.83763 | 16.86951 | 0 |
| 15608921 |           | 0 | 0 | 6.27E-10 | 67.3   | 3.07E-07 | 2 | 955.55675 | -0.43121 | 25.73214 | 0 |
| 15608921 | M1(Oxidat | 0 | 0 | 6.2E-12  | 65.67  | 7.18E-07 | 2 | 1877.9793 | -2.01315 | 43.80722 | 0 |
| 15608921 | M6(Oxidat | 0 | 0 | 0.1653   | 65.37  | 3.34E-07 | 2 | 1400.6741 | 0.391643 | 35.44331 | 0 |
| 15608921 | M6(Oxidat | 0 | 0 | 5.2E-08  | 59.54  | 1.11E-06 | 2 | 1384.6789 | 0.161992 | 40.60149 | 0 |
| 15608921 |           | 0 | 0 | 8.17E-08 | 57.5   | 2.31E-06 | 2 | 1368.683  | -0.51897 | 43.47664 | 0 |
| 15608921 | M4(Oxidat | 0 | 0 | 0.01973  | 56.47  | 2.25E-06 | 2 | 1416.6681 | -0.24556 | 32.81721 | 0 |
| 15608921 |           | 0 | 0 | 0.06262  | 54.41  | 7.43E-06 | 2 | 1278.6346 | 1.60936  | 26.17332 | 0 |
| 15608921 |           | 0 | 0 | 0.00627  | 52.62  | 1.12E-05 | 2 | 1861.9892 | 0.548897 | 45.55264 | 0 |
| 15608921 |           | 0 | 0 | 2.09E-05 | 41.31  | 0.000141 | 2 | 919.4995  | -0.15554 | 29.01694 | 0 |
| 15608921 |           | 0 | 0 | 0.03276  | 39.82  | 0.000104 | 2 | 1114.5435 | 0.541325 | 27.5584  | 0 |

|          |           |   |   |          |        |          |   |           |          |          |   |
|----------|-----------|---|---|----------|--------|----------|---|-----------|----------|----------|---|
| 15608921 |           | 0 | 0 | 0.1483   | 39.27  | 0.000201 | 2 | 1210.6471 | 0.389069 | 26.2581  | 0 |
| 15608921 | M7(Oxidat | 0 | 0 | 0.2982   | 33.81  | 0.000686 | 2 | 961.51372 | 0.138504 | 23.77703 | 0 |
| 15608921 |           | 0 | 0 | 0.000299 | 33.58  | 0.001009 | 2 | 855.43913 | -0.23004 | 18.66718 | 0 |
| 15608921 |           | 0 | 0 | 0.2982   | 29.02  | 0.004135 | 2 | 945.5183  | -0.39575 | 27.62212 | 0 |
| 15607648 | M20(Oxid. | 0 | 0 | 0.000205 | 119.84 | 1.97E-12 | 3 | 2544.2534 | -0.48156 | 38.84073 | 1 |
| 15607648 |           | 0 | 0 | 0.00686  | 113.82 | 7.68E-12 | 2 | 2257.1253 | -2.80869 | 38.78537 | 0 |
| 15607648 |           | 0 | 0 | 0.002575 | 110.23 | 2.18E-11 | 3 | 2528.261  | 0.497633 | 40.37888 | 1 |
| 15607648 | M13(Oxid. | 0 | 0 | 0.02796  | 107.93 | 2.74E-11 | 3 | 2560.2559 | 2.484997 | 34.90712 | 1 |
| 15607648 |           | 0 | 0 | 0.07311  | 97.06  | 1.96E-10 | 2 | 2920.3843 | 1.843471 | 38.16988 | 1 |
| 15607648 |           | 0 | 0 | 0.03409  | 93.3   | 1.05E-09 | 2 | 1836.9858 | 0.138309 | 36.56614 | 0 |
| 15607648 | M18(Oxid. | 0 | 0 | 0.001504 | 91.67  | 1.33E-09 | 2 | 2273.1268 | 0.092508 | 37.11153 | 0 |
| 15607648 |           | 0 | 0 | 0.01189  | 88.02  | 1.57E-09 | 3 | 3408.5562 | -0.52332 | 44.45226 | 0 |
| 15607648 |           | 0 | 0 | 0.01262  | 87.07  | 4.02E-09 | 2 | 1771.9245 | 1.069332 | 45.06882 | 0 |
| 15607648 |           | 0 | 0 | 0.05181  | 86.71  | 2.13E-09 | 2 | 1760.8073 | 1.401218 | 42.23598 | 0 |
| 15607648 | M3(Oxidat | 0 | 0 | 0.003094 | 79.67  | 1.08E-08 | 3 | 1629.7119 | 0.8872   | 19.26512 | 0 |
| 15607648 | M2(Oxidat | 0 | 0 | 0.02539  | 74.11  | 3.87E-08 | 2 | 1694.7635 | 0.506875 | 24.97954 | 0 |
| 15607648 | M5(Oxidat | 0 | 0 | 0.007323 | 73.68  | 4.28E-08 | 3 | 3424.5403 | -3.7056  | 40.61521 | 0 |
| 15607648 | M1(Oxidat | 0 | 0 | 0.02951  | 71.92  | 6.41E-08 | 3 | 3472.5417 | 1.160494 | 31.66351 | 0 |
| 15607648 | M14(Oxid. | 0 | 0 | 0.04077  | 71.5   | 1.38E-07 | 2 | 1810.8987 | -0.95923 | 31.52195 | 0 |
| 15607648 |           | 0 | 0 | 0.04454  | 70.66  | 8.57E-08 | 2 | 2764.2801 | 0.815979 | 40.24657 | 0 |
| 15607648 |           | 0 | 0 | 0.005685 | 68.89  | 2.45E-07 | 2 | 1794.9047 | -0.46833 | 35.21839 | 0 |
| 15607648 | M11(Oxid. | 0 | 0 | 0.03148  | 68.04  | 2.2E-07  | 2 | 2289.1226 | 0.500145 | 32.95975 | 0 |
| 15607648 | M1(Oxidat | 0 | 0 | 0.07653  | 66.69  | 2.14E-07 | 4 | 3440.5487 | 0.251547 | 39.48866 | 0 |
| 15607648 |           | 0 | 0 | 0.09767  | 63.69  | 4.27E-07 | 2 | 1678.7629 | -2.88088 | 26.83876 | 0 |
| 15607648 | M3(Oxidat | 0 | 0 | 0.09751  | 63.18  | 4.8E-07  | 2 | 1597.7209 | 0.163667 | 27.13616 | 0 |
| 15607648 | M5(Oxidat | 0 | 0 | 0.1029   | 63.01  | 1.43E-06 | 2 | 1159.6032 | 0.336937 | 28.2618  | 0 |
| 15607648 | M3(Oxidat | 0 | 0 | 0.05708  | 62.59  | 5.5E-07  | 2 | 1838.8531 | 0.311957 | 19.25085 | 1 |
| 15607648 | M10(Oxid. | 0 | 0 | 0.02805  | 61.1   | 7.74E-07 | 2 | 1581.7264 | 0.423372 | 27.99231 | 0 |
| 15607648 |           | 0 | 0 | 0.09783  | 60.54  | 2.25E-06 | 2 | 1143.612  | 3.580563 | 31.88039 | 0 |
| 15607648 |           | 0 | 0 | 0.07933  | 58.92  | 1.6E-06  | 2 | 1777.8656 | -0.04675 | 37.97361 | 0 |
| 15607648 |           | 0 | 0 | 0.04624  | 58.84  | 1.96E-06 | 2 | 1782.8671 | -2.00142 | 40.67133 | 0 |
| 15607648 |           | 0 | 0 | 0.05728  | 57.98  | 4.06E-06 | 2 | 1558.8302 | -1.92035 | 45.03989 | 0 |
| 15607648 |           | 0 | 0 | 0.02677  | 55.15  | 3.97E-06 | 2 | 1565.7316 | 0.532455 | 35.2606  | 0 |
| 15607648 | M20(Oxid. | 0 | 0 | 0.1587   | 53.87  | 1.56E-05 | 3 | 2935.4941 | 1.225498 | 39.10471 | 1 |
| 15607648 | M2(Oxidat | 0 | 0 | 0.1327   | 53.67  | 4.29E-06 | 2 | 1710.7621 | 2.689596 | 20.44493 | 0 |
| 15607648 | M6(Oxidat | 0 | 0 | 0.1061   | 53.02  | 4.98E-06 | 2 | 1613.7154 | -0.09089 | 21.58478 | 0 |



|          |           |   |   |          |        |          |   |           |          |          |   |
|----------|-----------|---|---|----------|--------|----------|---|-----------|----------|----------|---|
| 15607648 |           | 0 | 0 | 0.1103   | 49.8   | 3.61E-05 | 3 | 2919.494  | -0.55134 | 42.14372 | 1 |
| 15607648 | C2(Carban | 0 | 0 | 0.03939  | 45.41  | 2.87E-05 | 3 | 1589.7354 | 0.09839  | 34.47466 | 0 |
| 15607648 |           | 0 | 0 | 0.1936   | 45.18  | 3.03E-05 | 2 | 1170.7203 | -0.23819 | 21.29592 | 0 |
| 15607648 | M12(Oxid  | 0 | 0 | 0.1666   | 39.94  | 0.000218 | 2 | 1574.8326 | 2.800825 | 41.50423 | 0 |
| 15607648 |           | 0 | 0 | 0.1405   | 37.21  | 0.000219 | 3 | 2278.2447 | 0.198747 | 35.76738 | 1 |
| 15607648 | M1(Oxidat | 0 | 0 | 0.171    | 36.29  | 0.000234 | 4 | 3456.5148 | -8.09633 | 35.82337 | 0 |
| 15607648 |           | 0 | 0 | 0.242    | 34.63  | 0.000654 | 2 | 1384.7214 | -0.44791 | 21.33981 | 0 |
| 15607648 |           | 0 | 0 | 0.1685   | 33.19  | 0.000528 | 2 | 768.38805 | -0.79805 | 18.52718 | 0 |
| 15607648 | M2(Oxidat | 0 | 0 | 0.1901   | 28.79  | 0.00251  | 2 | 1590.8221 | -0.63    | 37.81668 | 0 |
| 15607648 | M14(Oxid  | 0 | 0 | 0.1506   | 28.37  | 0.004148 | 3 | 2951.4823 | -1.04942 | 36.80113 | 1 |
| 15607648 |           | 0 | 0 | 0.2345   | 27.79  | 0.001659 | 2 | 764.45616 | 1.140708 | 23.77497 | 0 |
| 15607206 |           | 0 | 0 | 6.12E-16 | 116.55 | 2.43E-12 | 2 | 1862.8816 | -0.23722 | 35.61487 | 0 |
| 15607206 |           | 0 | 0 | 3.77E-19 | 109.05 | 2.68E-11 | 2 | 2135.0774 | 0.271127 | 40.45891 | 0 |
| 15607206 |           | 0 | 0 | 6.9E-15  | 97.76  | 1.76E-10 | 2 | 1918.9183 | 0.025634 | 37.09056 | 0 |
| 15607206 |           | 0 | 0 | 4.85E-07 | 93.39  | 8.93E-10 | 2 | 1594.8067 | -0.30918 | 26.63103 | 0 |
| 15607206 |           | 0 | 0 | 1.75E-14 | 88.84  | 2.16E-09 | 2 | 2636.2989 | -0.13108 | 36.46547 | 0 |
| 15607206 |           | 0 | 0 | 1.32E-11 | 84.1   | 8.17E-09 | 2 | 1586.7857 | 0.429062 | 46.32529 | 0 |
| 15607206 |           | 0 | 0 | 1.26E-11 | 82.47  | 1.13E-08 | 2 | 1476.7696 | 0.154085 | 33.43573 | 0 |
| 15607206 |           | 0 | 0 | 3.97E-15 | 81.19  | 1.75E-08 | 2 | 2288.1604 | 0.273883 | 38.68246 | 0 |
| 15607206 | M5(Oxidat | 0 | 0 | 5.65E-05 | 80.92  | 1.09E-08 | 2 | 1097.5413 | 0.410977 | 19.09999 | 0 |
| 15607206 |           | 0 | 0 | 2.23E-11 | 77.97  | 5.11E-08 | 2 | 1499.8067 | 0.144634 | 49.77344 | 0 |
| 15607206 |           | 0 | 0 | 3.15E-11 | 76.83  | 2.7E-08  | 2 | 2902.5396 | 1.576923 | 41.807   | 0 |
| 15607206 |           | 0 | 0 | 4.18E-06 | 75.89  | 3.61E-08 | 2 | 1969.9277 | -0.72662 | 31.18954 | 0 |
| 15607206 |           | 0 | 0 | 2.7E-10  | 74.97  | 4.3E-08  | 2 | 1081.5457 | -0.22135 | 22.07482 | 0 |
| 15607206 |           | 0 | 0 | 1.49E-05 | 73.54  | 8.85E-08 | 2 | 1321.7116 | 0.35874  | 26.58271 | 0 |
| 15607206 |           | 0 | 0 | 1.15E-17 | 70.63  | 2.29E-07 | 2 | 2189.1072 | -1.24067 | 22.003   | 0 |
| 15607206 |           | 0 | 0 | 3.36E-05 | 67.1   | 4E-07    | 2 | 1093.5418 | -0.70016 | 27.24339 | 0 |
| 15607206 |           | 0 | 0 | 6.15E-14 | 64.59  | 5.91E-07 | 2 | 2113.0757 | 2.063292 | 33.86019 | 0 |
| 15607206 |           | 0 | 0 | 7.03E-07 | 63.38  | 6.43E-07 | 2 | 1157.6407 | -0.53445 | 26.70921 | 0 |
| 15607206 |           | 0 | 0 | 2.46E-07 | 60.93  | 1.21E-06 | 3 | 1811.896  | 1.279274 | 19.4473  | 0 |
| 15607206 |           | 0 | 0 | 0.00066  | 60.6   | 8.69E-07 | 2 | 1063.627  | 1.033655 | 49.53152 | 0 |
| 15607206 |           | 0 | 0 | 1.06E-06 | 58.8   | 2.04E-06 | 2 | 1295.6275 | 0.61569  | 49.77706 | 0 |
| 15607206 |           | 0 | 0 | 9.6E-08  | 58.61  | 2.55E-06 | 3 | 1795.9345 | 0.384811 | 33.49833 | 1 |
| 15607206 |           | 0 | 0 | 5.94E-06 | 57.64  | 3.1E-06  | 2 | 1376.6816 | 0.758965 | 25.42329 | 0 |
| 15607206 |           | 0 | 0 | 4.05E-06 | 51.22  | 1.28E-05 | 2 | 1035.5574 | -0.77316 | 15.58522 | 0 |
| 15607206 |           | 0 | 0 | 0.000134 | 48.52  | 4.01E-05 | 2 | 1203.6481 | 0.02292  | 20.60263 | 1 |

|          |           |   |       |          |        |          |   |           |          |          |   |
|----------|-----------|---|-------|----------|--------|----------|---|-----------|----------|----------|---|
| 15607206 | M22(Oxid. | 0 | 0     | 0.3159   | 46.82  | 4.89E-05 | 2 | 3015.5315 | 0.366582 | 36.4336  | 0 |
| 15607206 |           | 0 | 0     | 1.05E-05 | 46.7   | 3.31E-05 | 3 | 2338.252  | 0.233941 | 27.05341 | 1 |
| 15607206 |           | 0 | 0     | 7.63E-05 | 42.49  | 8.74E-05 | 3 | 1612.7887 | 1.245756 | 28.38823 | 1 |
| 15607206 |           | 0 | 0     | 6.43E-06 | 41.27  | 0.000149 | 3 | 2614.279  | 0.181127 | 38.24167 | 1 |
| 15607206 | N-Term(A  | 0 | 0     | 0.02958  | 38.03  | 0.000441 | 2 | 1541.8171 | 0.018096 | 28.24087 | 0 |
| 15607206 | N-Term(A  | 0 | 0     | 1.28E-06 | 37.52  | 0.000389 | 2 | 1636.8174 | -0.19299 | 29.07223 | 0 |
| 15607206 |           | 0 | 0     | 4.82E-05 | 37.21  | 0.000295 | 2 | 1121.5944 | -0.51119 | 17.49129 | 0 |
| 15607206 |           | 0 | 0     | 0.001699 | 35.53  | 0.000518 | 3 | 1905.9488 | -0.32826 | 43.66145 | 1 |
| 15607206 |           | 0 | 0     | 0.000122 | 34.6   | 0.000347 | 2 | 1065.6069 | 1.583907 | 21.14904 | 0 |
| 15607206 |           | 0 | 0     | 1E-05    | 32.07  | 0.00149  | 3 | 2999.5378 | 0.764656 | 38.80759 | 0 |
| 15607206 |           | 0 | 0     | 0.000447 | 31.5   | 0.001487 | 2 | 1173.6598 | 0.993761 | 20.22164 | 1 |
| 15607206 |           | 0 | 0     | 6.8E-06  | 30.82  | 0.000826 | 2 | 915.43151 | -0.46555 | 15.50254 | 0 |
| 15607206 |           | 0 | 0     | 0.000198 | 25.03  | 0.005025 | 2 | 1222.6161 | -1.13268 | 16.56265 | 1 |
| 15607206 |           | 0 | 0     | 0.2045   | 18.82  | 0.014434 | 2 | 822.43498 | -0.77475 | 18.10999 | 0 |
| 15607206 |           | 0 | 0.005 | 0.4244   | 22.92  | 0.005093 | 2 | 1054.6364 | -0.38986 | 20.37815 | 1 |
| 15608597 |           | 0 | 0     | 2.3E-14  | 105.61 | 3.85E-11 | 2 | 2250.2413 | 0.798686 | 42.36528 | 0 |
| 15608597 |           | 0 | 0     | 8.13E-09 | 79.97  | 2.01E-08 | 2 | 1500.7328 | -0.07038 | 32.24529 | 0 |
| 15608597 |           | 0 | 0     | 9.36E-09 | 65.95  | 4.57E-07 | 2 | 1716.9104 | -0.25238 | 45.08467 | 0 |
| 15608597 |           | 0 | 0     | 2.5E-11  | 56.12  | 3.67E-06 | 3 | 2317.1092 | -0.15763 | 34.75769 | 1 |
| 15608597 | M6(Oxidat | 0 | 0     | 5.54E-16 | 42.28  | 6.21E-05 | 2 | 2132.1897 | -0.07806 | 49.10046 | 0 |
| 15608597 |           | 0 | 0     | 0.005485 | 41.62  | 7.23E-05 | 2 | 835.3947  | 0.250922 | 22.01693 | 0 |
| 15607351 |           | 0 | 0     | 0.07821  | 95.24  | 6.13E-10 | 2 | 1414.7527 | -0.6914  | 30.77828 | 0 |
| 15607351 |           | 0 | 0     | 0.1034   | 91.37  | 9.12E-10 | 2 | 1587.8942 | -0.6793  | 48.91044 | 0 |
| 15607351 |           | 0 | 0     | 0.09907  | 89.87  | 2.68E-09 | 3 | 2359.211  | 0.403265 | 46.23949 | 1 |
| 15607351 |           | 0 | 0     | 0.2841   | 70.14  | 2.08E-07 | 2 | 1101.6264 | 0.080855 | 26.84754 | 0 |
| 15607351 |           | 0 | 0     | 0.1453   | 66.81  | 5.42E-07 | 3 | 2220.1737 | 0.224715 | 27.2179  | 1 |
| 15607351 |           | 0 | 0     | 0.2348   | 66.14  | 6.57E-07 | 2 | 1119.5799 | 0.473645 | 27.59131 | 0 |
| 15607235 |           | 0 | 0     | 0.1474   | 92.08  | 1.42E-09 | 2 | 1549.7767 | 0.527577 | 33.39378 | 0 |
| 15607235 | C3(Carban | 0 | 0     | 0.02722  | 91.13  | 7.69E-10 | 3 | 1790.7733 | 0.061005 | 19.96738 | 1 |
| 15607235 | M6(Oxidat | 0 | 0     | 0.116    | 90.8   | 1.62E-09 | 2 | 1528.7582 | 0.294363 | 27.42418 | 0 |
| 15607235 | N-Term(A  | 0 | 0     | 0.03244  | 88.18  | 2.81E-09 | 2 | 1591.7826 | -2.36586 | 34.1725  | 0 |
| 15607235 | C2(Carban | 0 | 0     | 0.04168  | 80.33  | 9.25E-09 | 2 | 1634.6724 | 0.215077 | 19.90142 | 0 |
| 15607235 |           | 0 | 0     | 0.0536   | 79.62  | 2.29E-08 | 3 | 1705.8764 | -0.30679 | 31.45115 | 1 |
| 15607235 |           | 0 | 0     | 0.1139   | 78.91  | 2.18E-08 | 2 | 1512.7635 | 0.405902 | 30.98426 | 0 |
| 15607235 | C3(Carban | 0 | 0     | 0.01577  | 75.71  | 2.68E-08 | 3 | 1806.7668 | -0.70595 | 15.93021 | 1 |
| 15607235 | C8(Carban | 0 | 0     | 0.0671   | 53.81  | 4.15E-06 | 2 | 1432.595  | 0.404163 | 16.20199 | 0 |

|          |           |   |   |          |        |          |   |           |          |          |   |
|----------|-----------|---|---|----------|--------|----------|---|-----------|----------|----------|---|
| 15607235 |           | 0 | 0 | 0.1148   | 48.42  | 1.44E-05 | 3 | 1376.8009 | -0.00278 | 22.27033 | 0 |
| 15607235 | C2(Carban | 0 | 0 | 0.1226   | 45.25  | 2.98E-05 | 3 | 1650.6659 | -0.63404 | 16.8112  | 0 |
| 15607235 |           | 0 | 0 | 0.2914   | 34.96  | 0.000686 | 2 | 1668.8636 | -0.24466 | 27.96165 | 1 |
| 15607235 |           | 0 | 0 | 0.3866   | 32.94  | 0.000507 | 2 | 1532.9017 | -0.26249 | 20.83404 | 1 |
| 15607235 |           | 0 | 0 | 0.2026   | 32.12  | 0.000829 | 3 | 1267.6751 | -0.22703 | 17.48952 | 1 |
| 15608452 |           | 0 | 0 | 0.008357 | 74.6   | 5.55E-08 | 2 | 1035.5468 | -0.17457 | 32.95705 | 0 |
| 15608452 |           | 0 | 0 | 0.002893 | 60.23  | 2.32E-06 | 2 | 1164.5901 | -0.68334 | 35.29856 | 0 |
| 15608452 |           | 0 | 0 | 0.0233   | 56.38  | 2.3E-06  | 2 | 870.41051 | 0.031852 | 19.85745 | 0 |
| 15608452 |           | 0 | 0 | 0.01773  | 54.2   | 9.5E-06  | 2 | 1191.6486 | 0.424512 | 25.11958 | 1 |
| 15608452 |           | 0 | 0 | 0.006812 | 47.49  | 5.26E-05 | 2 | 773.45189 | 0.348516 | 35.28761 | 0 |
| 15608452 |           | 0 | 0 | 0.05077  | 44.13  | 5.8E-05  | 2 | 1189.5735 | -1.16628 | 19.50543 | 1 |
| 15608452 |           | 0 | 0 | 0.1292   | 43     | 9.02E-05 | 2 | 929.55229 | -0.48153 | 21.16253 | 1 |
| 15608452 |           | 0 | 0 | 0.01429  | 42.6   | 7.42E-05 | 2 | 1426.7432 | -0.41328 | 29.34903 | 1 |
| 15607367 |           | 0 | 0 | 1.06E-19 | 118.48 | 3.05E-12 | 2 | 2393.2281 | -1.14755 | 35.91608 | 0 |
| 15607367 |           | 0 | 0 | 1.7E-13  | 99.69  | 2.04E-10 | 4 | 3717.8954 | 1.265541 | 48.74585 | 0 |
| 15607367 | M33(Oxid: | 0 | 0 | 1.1E-09  | 90.23  | 1.56E-09 | 4 | 3733.8834 | -0.5819  | 44.35201 | 0 |
| 15607367 |           | 0 | 0 | 2.19E-07 | 79.68  | 2.26E-08 | 2 | 1613.8403 | 0.468609 | 29.13944 | 1 |
| 15607367 |           | 0 | 0 | 8.51E-13 | 77.18  | 4.31E-08 | 2 | 2233.1585 | 3.189905 | 34.64764 | 0 |
| 15607367 |           | 0 | 0 | 2.56E-05 | 72.89  | 9.25E-08 | 2 | 1628.8449 | 1.040573 | 47.51477 | 0 |
| 15607367 |           | 0 | 0 | 0.000163 | 64.29  | 6.52E-07 | 2 | 994.48564 | 1.610885 | 27.76266 | 0 |
| 15607367 | M10(Oxid: | 0 | 0 | 2.3E-06  | 61.94  | 1.57E-06 | 2 | 1131.6188 | -0.2689  | 20.87325 | 0 |
| 15607367 |           | 0 | 0 | 1.15E-05 | 51.22  | 2.23E-05 | 3 | 1784.9443 | -0.00686 | 33.11961 | 1 |
| 15607367 |           | 0 | 0 | 0.000299 | 43.91  | 9.35E-05 | 3 | 2070.0946 | 1.245037 | 38.6737  | 1 |
| 15607367 |           | 0 | 0 | 4.29E-06 | 32.71  | 0.001447 | 4 | 2041.0911 | -1.35033 | 24.89121 | 2 |
| 15607367 |           | 0 | 0 | 0.000131 | 31.89  | 0.002006 | 2 | 1115.6231 | -1.00108 | 25.04726 | 0 |
| 15607367 |           | 0 | 0 | 0.02163  | 26.24  | 0.004991 | 2 | 1271.7251 | -0.14629 | 21.68712 | 1 |
| 15608660 | M12(Oxid: | 0 | 0 | 5.71E-16 | 73.41  | 9.58E-08 | 2 | 1678.8866 | 1.952472 | 25.60953 | 0 |
| 15608660 |           | 0 | 0 | 5.71E-16 | 72.46  | 1.02E-07 | 2 | 1662.888  | -0.27918 | 28.67113 | 0 |
| 15608660 |           | 0 | 0 | 1.44E-11 | 58.77  | 2.39E-06 | 3 | 2771.4898 | 2.583441 | 45.67285 | 0 |
| 15608660 | M18(Oxid: | 0 | 0 | 1.04E-14 | 45.95  | 3.81E-05 | 2 | 2151.0623 | -0.75444 | 33.54521 | 1 |
| 15608660 |           | 0 | 0 | 0.000133 | 40.37  | 0.000147 | 2 | 885.55138 | -0.33102 | 23.66366 | 1 |
| 15608660 |           | 0 | 0 | 7.18E-08 | 37.88  | 0.000236 | 3 | 2306.1462 | 0.373357 | 38.44363 | 0 |
| 15608127 | M5(Oxidat | 0 | 0 | 0.0808   | 90.5   | 1.16E-09 | 2 | 1565.736  | -0.26619 | 26.28688 | 0 |
| 15608127 |           | 0 | 0 | 0.04328  | 73.42  | 6.82E-08 | 2 | 1549.7427 | 0.782117 | 30.02072 | 0 |
| 15608127 | M5(Oxidat | 0 | 0 | 0.08167  | 67.13  | 3.39E-07 | 3 | 2138.0537 | -0.50151 | 24.81781 | 1 |
| 15608127 |           | 0 | 0 | 0.04992  | 62.33  | 1.02E-06 | 2 | 1383.7226 | -0.10083 | 20.11288 | 0 |

|          |           |   |   |          |        |          |   |           |          |          |   |
|----------|-----------|---|---|----------|--------|----------|---|-----------|----------|----------|---|
| 15608127 |           | 0 | 0 | 0.1268   | 61.53  | 1.09E-06 | 2 | 1500.7607 | 0.80387  | 29.276   | 1 |
| 15608127 |           | 0 | 0 | 0.2349   | 58.26  | 1.49E-06 | 2 | 1284.602  | 0.906903 | 29.54601 | 0 |
| 15608127 | M3(Oxidat | 0 | 0 | 0.1034   | 54.72  | 4.22E-06 | 2 | 1237.5905 | -0.8885  | 22.48568 | 0 |
| 15608127 |           | 0 | 0 | 0.1116   | 47.47  | 4.21E-05 | 2 | 1205.603  | 0.980067 | 26.53286 | 0 |
| 15608127 |           | 0 | 0 | 0.09961  | 42.48  | 0.000138 | 3 | 2122.0603 | 0.23354  | 27.68211 | 1 |
| 15608127 |           | 0 | 0 | 0.2028   | 25.05  | 0.009535 | 3 | 2584.335  | -0.6486  | 29.51221 | 0 |
| 15607347 |           | 0 | 0 | 0.000157 | 91.29  | 1.3E-09  | 2 | 1865.9603 | -0.10109 | 30.89548 | 0 |
| 15607347 | C6(Carban | 0 | 0 | 0.01864  | 71.42  | 7.19E-08 | 2 | 1388.6431 | 1.050453 | 34.7185  | 0 |
| 15607347 | M1(Oxidat | 0 | 0 | 0.02222  | 59.41  | 1.26E-06 | 2 | 1420.6736 | -0.07371 | 16.95591 | 0 |
| 15607347 | M2(Oxidat | 0 | 0 | 4.42E-06 | 53.79  | 9.82E-06 | 3 | 2706.3865 | -0.59028 | 30.42411 | 1 |
| 15607347 |           | 0 | 0 | 0.02952  | 53.42  | 9.55E-06 | 3 | 2416.2138 | 1.398042 | 22.2334  | 0 |
| 15607347 |           | 0 | 0 | 0.003375 | 50.75  | 1.68E-05 | 3 | 2696.3404 | 1.092562 | 27.84779 | 0 |
| 15607347 |           | 0 | 0 | 0.3375   | 41.3   | 8.9E-05  | 2 | 1404.6788 | -0.04468 | 20.03838 | 0 |
| 15607347 |           | 0 | 0 | 0.2711   | 35.73  | 0.000601 | 2 | 1348.7214 | -0.4821  | 30.81098 | 0 |
| 15607668 | N-Term(A  | 0 | 0 | 1.73E-13 | 109.61 | 1.42E-11 | 3 | 2787.52   | -9.93128 | 38.22785 | 2 |
| 15607668 |           | 0 | 0 | 5.34E-16 | 100.62 | 1.99E-10 | 2 | 1630.8954 | 0.123883 | 35.47333 | 0 |
| 15607668 |           | 0 | 0 | 5.34E-16 | 88.88  | 2.98E-09 | 2 | 1183.6426 | -0.34265 | 19.69519 | 0 |
| 15607668 |           | 0 | 0 | 5.34E-16 | 80.55  | 8.79E-09 | 4 | 4555.1642 | -1.34485 | 37.90196 | 0 |
| 15607668 |           | 0 | 0 | 5.34E-16 | 75.9   | 3.21E-08 | 3 | 2589.438  | 0.760821 | 34.54827 | 1 |
| 15607668 |           | 0 | 0 | 4.89E-11 | 74.28  | 3.72E-08 | 3 | 2461.3449 | 1.568852 | 37.35268 | 0 |
| 15607668 | C14(Carba | 0 | 0 | 5.34E-16 | 74.02  | 9.11E-08 | 2 | 1696.8444 | 0.473025 | 25.38531 | 0 |
| 15607668 |           | 0 | 0 | 5.34E-16 | 72.81  | 1.07E-07 | 2 | 2455.2049 | 0.29337  | 33.0463  | 0 |
| 15607668 |           | 0 | 0 | 1.08E-12 | 71.66  | 6.81E-08 | 2 | 1527.709  | 1.015032 | 21.9354  | 0 |
| 15607668 |           | 0 | 0 | 1.29E-07 | 67.84  | 3.95E-07 | 3 | 2325.2298 | -0.55944 | 49.71127 | 0 |
| 15607668 |           | 0 | 0 | 1.03E-09 | 64     | 8.76E-07 | 3 | 2072.0136 | -0.99775 | 45.12619 | 0 |
| 15607668 |           | 0 | 0 | 1.92E-07 | 59.28  | 2.12E-06 | 3 | 1822.9881 | -0.10368 | 21.90362 | 1 |
| 15607668 |           | 0 | 0 | 8.05E-12 | 53.75  | 4.21E-06 | 2 | 976.56822 | -0.49913 | 17.46178 | 0 |
| 15607668 |           | 0 | 0 | 5.34E-16 | 51.68  | 6.78E-06 | 4 | 2745.5382 | 0.406993 | 34.80551 | 2 |
| 15607668 | N-Term(A  | 0 | 0 | 5.34E-16 | 50.91  | 1.87E-05 | 3 | 2367.2457 | 1.716914 | 35.2503  | 0 |
| 15607668 |           | 0 | 0 | 1.3E-15  | 46.98  | 2.81E-05 | 3 | 2939.4439 | 0.098831 | 31.55768 | 1 |
| 15607668 | N-Term(A  | 0 | 0 | 5.34E-16 | 46.87  | 2.88E-05 | 3 | 2114.0273 | 0.520602 | 30.79674 | 0 |
| 15607668 | N-Term(A  | 0 | 0 | 5.34E-16 | 33.69  | 0.001069 | 2 | 1672.9083 | 1.46716  | 43.35682 | 0 |
| 15607668 |           | 0 | 0 | 0.2624   | 30.29  | 0.001543 | 3 | 1683.8075 | -0.67292 | 19.63765 | 1 |
| 15607668 |           | 0 | 0 | 1.63E-08 | 25.83  | 0.00431  | 5 | 3683.8936 | 0.141331 | 38.77903 | 1 |
| 15607668 | N-Term(A  | 0 | 0 | 0.000587 | 22.07  | 0.008071 | 2 | 1018.5788 | -0.42443 | 20.81728 | 0 |
| 15608209 |           | 0 | 0 | 5.91E-17 | 98.35  | 1.75E-10 | 2 | 1995.9802 | -0.18595 | 33.38138 | 0 |

|          |           |   |   |          |        |          |   |           |          |          |   |
|----------|-----------|---|---|----------|--------|----------|---|-----------|----------|----------|---|
| 15608209 |           | 0 | 0 | 1.42E-12 | 87.5   | 3.2E-09  | 2 | 1286.6377 | 0.102291 | 25.80353 | 0 |
| 15608209 | M12(Oxid: | 0 | 0 | 1.47E-05 | 87.2   | 2.86E-09 | 2 | 2011.974  | -0.6907  | 49.0693  | 0 |
| 15608209 |           | 0 | 0 | 3.06E-11 | 76.77  | 2.21E-08 | 2 | 1689.7898 | 1.799763 | 34.27333 | 0 |
| 15608209 |           | 0 | 0 | 0.00012  | 72.5   | 1.24E-07 | 2 | 1810.8893 | 3.400829 | 29.19157 | 0 |
| 15608209 | M14(Oxid: | 0 | 0 | 0.000152 | 71.97  | 1.24E-07 | 3 | 2942.4737 | 0.197691 | 38.86577 | 0 |
| 15608209 |           | 0 | 0 | 8.93E-12 | 71.11  | 1.67E-07 | 2 | 2039.0452 | -2.26463 | 36.45708 | 0 |
| 15608209 | M18(Oxid: | 0 | 0 | 0.000393 | 70.69  | 1.79E-07 | 2 | 2768.4146 | 2.467867 | 44.41653 | 0 |
| 15608209 | N-Term(A  | 0 | 0 | 9.32E-06 | 61.87  | 1.01E-06 | 2 | 1852.8918 | -1.06054 | 33.16155 | 0 |
| 15608209 |           | 0 | 0 | 1.79E-08 | 54.7   | 3.38E-06 | 2 | 2483.1961 | 0.407225 | 39.61191 | 0 |
| 15608209 |           | 0 | 0 | 0.004902 | 54.59  | 7.3E-06  | 3 | 2752.4079 | -1.80941 | 46.51455 | 0 |
| 15608209 |           | 0 | 0 | 1.83E-08 | 50.1   | 2.35E-05 | 3 | 2926.4769 | -0.45429 | 42.55127 | 0 |
| 15608209 |           | 0 | 0 | 0.000267 | 47.97  | 3.11E-05 | 2 | 1048.5423 | 0.059728 | 24.41149 | 0 |
| 15608209 |           | 0 | 0 | 1.18E-06 | 47.74  | 3.62E-05 | 2 | 2345.1922 | -0.15991 | 38.83663 | 0 |
| 15608209 |           | 0 | 0 | 0.000105 | 47.59  | 4.01E-05 | 3 | 1668.9078 | 0.562482 | 39.80349 | 1 |
| 15608209 |           | 0 | 0 | 0.003362 | 46.69  | 5.36E-05 | 2 | 1790.9528 | 0.332274 | 20.3204  | 1 |
| 15608209 |           | 0 | 0 | 0.1015   | 41.33  | 0.000162 | 3 | 1563.8117 | -1.46542 | 21.24595 | 0 |
| 15608209 |           | 0 | 0 | 0.005163 | 33.83  | 0.001304 | 2 | 1344.7419 | -0.35874 | 33.6784  | 1 |
| 15608209 | N-Term(A  | 0 | 0 | 0.000106 | 33.4   | 0.000754 | 2 | 2053.9915 | 2.678383 | 27.59028 | 0 |
| 15608209 | N-Term(A  | 0 | 0 | 0.1206   | 29.02  | 0.002882 | 3 | 2810.4219 | 1.273066 | 42.38535 | 0 |
| 15608660 |           | 0 | 0 | 0.01295  | 117.73 | 2.11E-12 | 2 | 1681.9233 | 0.008367 | 43.85251 | 0 |
| 15608660 |           | 0 | 0 | 0.02569  | 101.11 | 1.36E-10 | 2 | 1934.0374 | 1.638962 | 43.79677 | 0 |
| 15608660 | M10(Oxid: | 0 | 0 | 0.09212  | 100.78 | 8.34E-11 | 2 | 1407.6637 | 2.122373 | 30.84932 | 0 |
| 15608660 |           | 0 | 0 | 0.010912 | 80.72  | 1.44E-08 | 3 | 3485.7524 | 0.448461 | 42.04279 | 0 |
| 15608660 | M15(Oxid: | 0 | 0 | 0.01657  | 75.97  | 2.91E-08 | 2 | 2612.2637 | -0.95198 | 36.5825  | 0 |
| 15608660 | M10(Oxid: | 0 | 0 | 0.08594  | 74.75  | 3.34E-08 | 2 | 1423.6562 | 0.354179 | 25.42691 | 0 |
| 15608660 |           | 0 | 0 | 0.1082   | 73.06  | 7.66E-08 | 2 | 1413.7222 | -0.8458  | 24.80749 | 0 |
| 15608660 |           | 0 | 0 | 0.08764  | 67.2   | 4E-07    | 2 | 2637.3821 | -0.85449 | 34.44441 | 0 |
| 15608660 |           | 0 | 0 | 0.2861   | 64.68  | 9.36E-07 | 3 | 1541.8165 | -1.21925 | 21.81586 | 1 |
| 15608660 | M10(Oxid: | 0 | 0 | 0.211    | 61.79  | 1.66E-06 | 2 | 1399.7637 | 1.62397  | 32.56904 | 0 |
| 15608660 |           | 0 | 0 | 0.2507   | 59.31  | 2.23E-06 | 2 | 1383.7662 | -0.26769 | 34.75659 | 0 |
| 15608660 |           | 0 | 0 | 0.2637   | 56.54  | 3.22E-06 | 3 | 2596.2751 | 1.474536 | 40.29927 | 0 |
| 15608660 |           | 0 | 0 | 0.289    | 56.43  | 3.53E-06 | 2 | 1264.6279 | -0.17878 | 21.4014  | 0 |
| 15608660 | M4(Oxidat | 0 | 0 | 0.116    | 56.21  | 5.86E-06 | 3 | 2983.5177 | 0.750137 | 46.161   | 0 |
| 15608660 |           | 0 | 0 | 0.2969   | 50.67  | 1.71E-05 | 2 | 1061.5837 | -0.08999 | 21.15849 | 0 |
| 15608660 |           | 0 | 0 | 0.4343   | 49.88  | 2.57E-05 | 4 | 3021.5973 | 0.261267 | 35.2726  | 1 |
| 15608660 | M7(Oxidat | 0 | 0 | 0.4661   | 42.42  | 0.000126 | 3 | 2107.0301 | 1.095468 | 32.55078 | 0 |

|          |           |   |   |          |        |          |   |           |          |          |   |
|----------|-----------|---|---|----------|--------|----------|---|-----------|----------|----------|---|
| 15607425 | M12(Oxid. | 0 | 0 | 0.1877   | 97.06  | 3.94E-10 | 2 | 1663.8362 | 0.09192  | 34.97602 | 0 |
| 15607425 |           | 0 | 0 | 0.1674   | 88.69  | 2.84E-09 | 2 | 1963.0241 | -0.17109 | 32.34687 | 0 |
| 15607425 |           | 0 | 0 | 0.1768   | 72.87  | 1.14E-07 | 2 | 1541.8696 | 0.572769 | 32.4018  | 0 |
| 15607425 |           | 0 | 0 | 0.2186   | 71.46  | 1.29E-07 | 2 | 1184.6999 | 0.055204 | 28.30137 | 0 |
| 15607425 |           | 0 | 0 | 0.1352   | 70.9   | 1.63E-07 | 2 | 1668.81   | -0.96307 | 25.17789 | 0 |
| 15607425 |           | 0 | 0 | 0.1206   | 58.72  | 1.34E-06 | 2 | 1312.794  | -0.60054 | 26.85193 | 1 |
| 15607425 |           | 0 | 0 | 0.08865  | 55.85  | 2.59E-06 | 3 | 2272.2735 | 1.483251 | 44.69248 | 0 |
| 15607425 |           | 0 | 0 | 0.3986   | 54.97  | 3.18E-06 | 2 | 1152.663  | 0.564056 | 21.67626 | 0 |
| 15607425 |           | 0 | 0 | 0.2504   | 53.54  | 6.2E-06  | 2 | 2922.4019 | 0.479663 | 32.70151 | 0 |
| 15607425 |           | 0 | 0 | 0.4529   | 52.11  | 1.45E-05 | 2 | 932.48332 | -0.36176 | 27.06731 | 0 |
| 15607425 |           | 0 | 0 | 0.3777   | 52.02  | 9.73E-06 | 2 | 1254.6259 | -0.07907 | 17.77629 | 0 |
| 15607425 |           | 0 | 0 | 0.4298   | 49.91  | 1.02E-05 | 2 | 1081.6294 | 0.176428 | 33.69802 | 0 |
| 15607425 |           | 0 | 0 | 0.3942   | 47.04  | 5.54E-05 | 2 | 1088.5854 | 0.545154 | 24.70353 | 1 |
| 15607425 |           | 0 | 0 | 0.2886   | 40.36  | 0.000212 | 2 | 1234.6539 | -0.06083 | 21.65062 | 1 |
| 15607425 |           | 0 | 0 | 0.4018   | 34.69  | 0.000934 | 2 | 802.44072 | -1.32081 | 14.52436 | 0 |
| 15607425 |           | 0 | 0 | 0.2025   | 29.33  | 0.001342 | 2 | 1213.7288 | 2.01533  | 22.51204 | 1 |
| 15607425 |           | 0 | 0 | 0.2765   | 24.21  | 0.004552 | 2 | 1451.8355 | -1.03626 | 33.20301 | 0 |
| 15607425 | M12(Oxid. | 0 | 0 | 0.3481   | 22.22  | 0.009897 | 3 | 1817.9108 | -0.47062 | 30.39547 | 1 |
| 15607425 |           | 0 | 0 | 0.3356   | 20.49  | 0.017419 | 3 | 1645.8169 | 0.794368 | 34.71651 | 0 |
| 15608016 |           | 0 | 0 | 0.3958   | 48.86  | 2.47E-05 | 3 | 1365.7149 | -1.4519  | 15.24226 | 1 |
| 15608016 |           | 0 | 0 | 0.3448   | 42.24  | 8.66E-05 | 2 | 1524.7677 | -1.05164 | 25.84194 | 0 |
| 15608016 |           | 0 | 0 | 0.2947   | 38.78  | 0.000411 | 2 | 931.51738 | -0.93366 | 24.79122 | 0 |
| 15608016 | M5(Oxidat | 0 | 0 | 0.4305   | 19.69  | 0.014499 | 2 | 1138.5788 | 0.111235 | 13.02856 | 0 |
| 15608048 | M7(Oxidat | 0 | 0 | 0.02782  | 126.19 | 2.4E-13  | 2 | 1962.8844 | -0.93703 | 27.60519 | 0 |
| 15608048 |           | 0 | 0 | 0.00946  | 103.29 | 4.68E-11 | 2 | 1946.8859 | -2.80419 | 47.77439 | 0 |
| 15608048 |           | 0 | 0 | 0.3813   | 45.14  | 3.05E-05 | 2 | 1278.8248 | -0.73245 | 26.83684 | 0 |
| 15607218 | M4(Oxidat | 0 | 0 | 1.03E-14 | 78.33  | 1.47E-08 | 2 | 2132.021  | -0.32486 | 31.37224 | 0 |
| 15607218 |           | 0 | 0 | 3.18E-08 | 57.83  | 2.23E-06 | 2 | 1568.8893 | -0.93791 | 27.85112 | 1 |
| 15607218 |           | 0 | 0 | 1.06E-14 | 57.11  | 2.72E-06 | 2 | 2116.0271 | 0.154019 | 34.46828 | 0 |
| 15607218 |           | 0 | 0 | 0.01009  | 46.78  | 2.09E-05 | 2 | 952.55535 | -2.26323 | 14.39804 | 1 |
| 15607218 | M5(Oxidat | 0 | 0 | 1.7E-08  | 44.07  | 5.29E-05 | 3 | 2288.1236 | 0.338288 | 30.49323 | 1 |
| 15607218 |           | 0 | 0 | 0.06857  | 42.93  | 5.35E-05 | 2 | 1061.6203 | -1.12511 | 15.39374 | 1 |
| 15607218 |           | 0 | 0 | 0.000258 | 32.58  | 0.001353 | 2 | 1014.558  | -1.16337 | 15.24502 | 1 |
| 15607218 |           | 0 | 0 | 0.1769   | 26.6   | 0.002953 | 2 | 799.48955 | -0.23984 | 14.17672 | 1 |
| 15607218 |           | 0 | 0 | 0.009799 | 22.18  | 0.006039 | 4 | 1557.8964 | -0.58302 | 19.74598 | 1 |
| 15608932 |           | 0 | 0 | 7.04E-17 | 93.4   | 6.63E-10 | 2 | 1242.6337 | 0.952244 | 22.53923 | 0 |

|          |           |   |   |          |       |          |   |           |          |          |   |
|----------|-----------|---|---|----------|-------|----------|---|-----------|----------|----------|---|
| 15608932 |           | 0 | 0 | 0.0003   | 92.1  | 6.15E-10 | 2 | 1697.7591 | -1.34324 | 24.2625  | 0 |
| 15608932 |           | 0 | 0 | 5.55E-16 | 88.77 | 2.72E-09 | 2 | 1941.0383 | -0.93027 | 25.93962 | 1 |
| 15608932 |           | 0 | 0 | 4E-13    | 86.16 | 6.66E-09 | 2 | 1784.9393 | 0.176635 | 30.16571 | 0 |
| 15608932 | C4(Carban | 0 | 0 | 1.66E-12 | 77.68 | 4.09E-08 | 2 | 1370.7266 | 1.17806  | 37.71358 | 0 |
| 15608932 |           | 0 | 0 | 0.03025  | 67.93 | 3.46E-07 | 2 | 1511.8172 | -0.3539  | 22.84499 | 1 |
| 15608932 |           | 0 | 0 | 9.55E-15 | 66.93 | 2.43E-07 | 3 | 2266.1122 | 0.977195 | 30.48956 | 1 |
| 15608932 | C6(Carban | 0 | 0 | 7.1E-10  | 45.24 | 5.39E-05 | 2 | 1583.8471 | -0.31051 | 32.81864 | 1 |
| 15608932 | N-Term(A  | 0 | 0 | 9.43E-08 | 39.37 | 0.000208 | 2 | 1412.7372 | 1.182043 | 44.45985 | 0 |
| 15608932 |           | 0 | 0 | 0.00006  | 33.31 | 0.0007   | 2 | 1007.5263 | -0.62389 | 15.66114 | 1 |
| 15608932 |           | 0 | 0 | 0.04076  | 31.22 | 0.001019 | 2 | 851.42552 | -0.32607 | 17.37962 | 0 |
| 15608932 |           | 0 | 0 | 0.0331   | 18.59 | 0.029747 | 4 | 1941.0403 | 0.124989 | 29.58995 | 1 |
| 15607553 |           | 0 | 0 | 0.126399 | 82.29 | 1.36E-08 | 2 | 1875.0064 | -1.05922 | 26.45845 | 0 |
| 15607553 |           | 0 | 0 | 0.2713   | 81.76 | 9.67E-09 | 2 | 1400.7864 | 0.544874 | 25.47988 | 0 |
| 15607553 |           | 0 | 0 | 0.4284   | 79.05 | 2.24E-08 | 2 | 1017.5577 | 0.111528 | 26.71991 | 0 |
| 15607553 |           | 0 | 0 | 0.2858   | 76.4  | 3.67E-08 | 2 | 1237.6183 | 0.931169 | 23.21956 | 0 |
| 15607553 |           | 0 | 0 | 0.467    | 60.5  | 1.29E-06 | 2 | 2031.1098 | 0.141553 | 25.55643 | 1 |
| 15607553 |           | 0 | 0 | 0.254    | 39.01 | 0.000201 | 2 | 1821.8804 | -1.90057 | 22.36829 | 1 |
| 15608569 |           | 0 | 0 | 9.32E-16 | 99.99 | 1.7E-10  | 3 | 3495.8331 | 2.440534 | 34.95447 | 1 |
| 15608569 | C12(Carba | 0 | 0 | 1.22E-11 | 90.16 | 9.62E-10 | 2 | 1794.808  | 1.279077 | 48.46091 | 0 |
| 15608569 | M14(Oxid. | 0 | 0 | 2.29E-08 | 87.43 | 2.8E-09  | 2 | 1903.9123 | 0.831311 | 38.21719 | 0 |
| 15608569 |           | 0 | 0 | 1.83E-06 | 79.66 | 2.22E-08 | 2 | 3226.6316 | -2.39938 | 36.01105 | 0 |
| 15608569 |           | 0 | 0 | 1.66E-08 | 76.21 | 4.67E-08 | 2 | 1887.917  | 0.6666   | 44.6232  | 0 |
| 15608569 | M7(Oxidat | 0 | 0 | 1.86E-06 | 71.78 | 6.62E-08 | 2 | 1353.6205 | 0.15861  | 17.13135 | 0 |
| 15608569 | M10(Oxid. | 0 | 0 | 8.12E-07 | 70.56 | 8.77E-08 | 2 | 1443.6667 | -0.40364 | 21.71117 | 0 |
| 15608569 | C1(Carban | 0 | 0 | 0.000123 | 59.51 | 1.12E-06 | 2 | 1067.4572 | -0.30388 | 21.41996 | 0 |
| 15608569 |           | 0 | 0 | 0.001359 | 57.13 | 1.93E-06 | 2 | 853.52568 | 0.259001 | 27.18291 | 0 |
| 15608569 |           | 0 | 0 | 0.000304 | 56.03 | 2.49E-06 | 2 | 1337.6227 | -1.99835 | 22.0941  | 0 |
| 15608569 |           | 0 | 0 | 0.000266 | 53.93 | 4.04E-06 | 2 | 1473.8821 | 2.229742 | 26.77319 | 0 |
| 15608569 |           | 0 | 0 | 0.001018 | 51.28 | 7.43E-06 | 2 | 1089.4961 | 0.128545 | 18.51877 | 0 |
| 15608569 |           | 0 | 0 | 0.04756  | 44.4  | 9.08E-05 | 2 | 1358.6807 | -0.35302 | 19.95212 | 1 |
| 15608569 |           | 0 | 0 | 0.000824 | 44.19 | 7.62E-05 | 2 | 1129.6564 | -1.04601 | 24.61743 | 0 |
| 15608569 | C2(Carban | 0 | 0 | 0.01353  | 40.79 | 8.32E-05 | 3 | 1223.5579 | -0.63776 | 19.16784 | 1 |
| 15608569 |           | 0 | 0 | 0.000218 | 39.26 | 0.000119 | 3 | 2107.1812 | 0.002466 | 29.73426 | 1 |
| 15607193 | C6(Carban | 0 | 0 | 2.48E-08 | 81.78 | 1.06E-08 | 2 | 2639.2715 | 0.639068 | 38.51988 | 0 |
| 15607193 | M2(Oxidat | 0 | 0 | 1.02E-05 | 67.57 | 3.06E-07 | 3 | 2370.1811 | 2.104534 | 48.98714 | 0 |
| 15607193 | M2(Oxidat | 0 | 0 | 0.000326 | 63.26 | 1.2E-06  | 3 | 2386.1739 | 1.203172 | 48.70123 | 0 |

|          |           |   |   |          |        |          |   |           |          |          |   |
|----------|-----------|---|---|----------|--------|----------|---|-----------|----------|----------|---|
| 15607193 | C3(Carban | 0 | 0 | 1.37E-05 | 62.73  | 5.32E-07 | 2 | 1518.6941 | -1.6237  | 15.7256  | 0 |
| 15607193 |           | 0 | 0 | 3.51E-10 | 59.05  | 1.24E-06 | 3 | 1690.8026 | -0.31041 | 27.44627 | 0 |
| 15607193 |           | 0 | 0 | 3.11E-05 | 58.53  | 2.45E-06 | 2 | 921.47856 | -0.35603 | 17.69303 | 0 |
| 15607193 |           | 0 | 0 | 0.00182  | 56.37  | 2.3E-06  | 2 | 1002.474  | -1.22269 | 16.41848 | 0 |
| 15607193 | C6(Carban | 0 | 0 | 0.00499  | 46.74  | 4.55E-05 | 3 | 3174.5511 | 0.565522 | 39.62387 | 1 |
| 15608948 |           | 0 | 0 | 0.1199   | 69.7   | 1.18E-07 | 2 | 1732.813  | -0.4071  | 28.53535 | 0 |
| 15608948 |           | 0 | 0 | 0.02823  | 66.02  | 4.25E-07 | 3 | 2828.4768 | 1.541286 | 31.7726  | 1 |
| 15608948 |           | 0 | 0 | 0.07123  | 66.01  | 5.51E-07 | 3 | 2216.0956 | 0.592893 | 24.64408 | 1 |
| 15608948 | M17(Oxid. | 0 | 0 | 0.09686  | 63.8   | 9.38E-07 | 3 | 2844.4673 | -0.04852 | 30.43547 | 1 |
| 15608948 |           | 0 | 0 | 0.1633   | 56.4   | 4.01E-06 | 2 | 1006.5166 | 0.185617 | 18.62986 | 0 |
| 15608948 | M17(Oxid. | 0 | 0 | 0.1929   | 54.75  | 8.37E-06 | 2 | 2446.241  | 0.575616 | 30.46684 | 0 |
| 15608948 |           | 0 | 0 | 0.2591   | 42.11  | 0.000138 | 2 | 1710.9247 | 0.063659 | 19.24538 | 1 |
| 15608948 |           | 0 | 0 | 0.3123   | 33.88  | 0.00133  | 2 | 1442.7874 | 0.748422 | 18.22611 | 1 |
| 15608948 | C3(Carban | 0 | 0 | 0.3444   | 32.9   | 0.000872 | 3 | 1491.8123 | 1.484925 | 20.14356 | 1 |
| 15608948 |           | 0 | 0 | 0.4834   | 25.56  | 0.008617 | 4 | 2430.2445 | -0.06738 | 32.03932 | 0 |
| 15608122 |           | 0 | 0 | 0.00549  | 98.39  | 3.84E-10 | 2 | 1511.8425 | -0.27547 | 29.80747 | 0 |
| 15608122 |           | 0 | 0 | 0.1537   | 45.58  | 4.43E-05 | 2 | 1243.7111 | -0.53399 | 21.47913 | 1 |
| 15608122 |           | 0 | 0 | 0.195    | 44.04  | 6.9E-05  | 2 | 1278.701  | 1.71583  | 26.42811 | 1 |
| 15608122 |           | 0 | 0 | 0.09213  | 38.7   | 0.000189 | 2 | 839.40868 | 0.746561 | 23.67531 | 0 |
| 15608122 | M5(Oxidat | 0 | 0 | 0.2053   | 35.9   | 0.000256 | 2 | 855.40349 | 0.612204 | 20.58787 | 0 |
| 15608122 | M9(Oxidat | 0 | 0 | 0.1485   | 33.4   | 0.000823 | 3 | 1294.6893 | -3.39242 | 24.3671  | 1 |
| 15608122 |           | 0 | 0 | 0.3027   | 24.46  | 0.004476 | 2 | 1399.8129 | 0.01608  | 18.4602  | 2 |
| 15608122 | N-Term(A  | 0 | 0 | 0.2447   | 24.35  | 0.003664 | 2 | 881.41802 | -0.68067 | 26.07945 | 0 |
| 15608122 |           | 0 | 0 | 0.2294   | 14.61  | 0.077836 | 3 | 1667.8302 | 1.159019 | 18.84064 | 2 |
| 15607161 |           | 0 | 0 | 1.59E-09 | 100.81 | 9.96E-11 | 2 | 1325.7784 | -0.31935 | 47.09935 | 0 |
| 15607161 |           | 0 | 0 | 0.002663 | 99.64  | 1.68E-10 | 2 | 1349.743  | 0.419503 | 41.34886 | 0 |
| 15607161 |           | 0 | 0 | 0.008365 | 86.79  | 2.09E-09 | 2 | 1742.8099 | 1.079149 | 28.26743 | 0 |
| 15607161 |           | 0 | 0 | 0.002629 | 69.12  | 2.63E-07 | 3 | 3049.5739 | 1.64496  | 34.9025  | 1 |
| 15607161 |           | 0 | 0 | 4.43E-05 | 66.96  | 2.01E-07 | 3 | 2656.5064 | 1.140787 | 37.29014 | 1 |
| 15607161 |           | 0 | 0 | 0.000203 | 65.39  | 5.49E-07 | 3 | 1784.9747 | -1.10183 | 26.95917 | 1 |
| 15607161 |           | 0 | 0 | 1.39E-05 | 46.63  | 3.26E-05 | 2 | 2107.0054 | 0.136399 | 24.51732 | 1 |
| 15607161 |           | 0 | 0 | 0.000134 | 42.6   | 5.48E-05 | 2 | 838.51451 | -0.05768 | 20.19304 | 0 |
| 15607161 |           | 0 | 0 | 0.1287   | 39.88  | 0.000103 | 2 | 845.52056 | 0.217749 | 15.77886 | 1 |
| 15607161 |           | 0 | 0 | 0.1427   | 34.63  | 0.000344 | 2 | 1465.8831 | -1.29414 | 25.5711  | 1 |
| 15607245 |           | 0 | 0 | 3.81E-05 | 113.08 | 1.16E-11 | 2 | 1649.8338 | 1.288938 | 33.93509 | 0 |
| 15607245 | M14(Oxid. | 0 | 0 | 0.01442  | 103.79 | 7.1E-11  | 2 | 1665.8287 | 1.251377 | 25.78146 | 0 |



|          |           |   |       |          |        |          |   |           |          |          |   |
|----------|-----------|---|-------|----------|--------|----------|---|-----------|----------|----------|---|
| 15607245 | M17(Oxid. | 0 | 0     | 0.000108 | 103.16 | 1.16E-10 | 2 | 1979.0282 | 0.752663 | 44.37909 | 0 |
| 15607245 |           | 0 | 0     | 0.02548  | 94.39  | 8.92E-10 | 2 | 1963.0335 | 0.842352 | 48.68791 | 0 |
| 15607245 |           | 0 | 0     | 0.009001 | 77.56  | 2.89E-08 | 4 | 3518.7609 | -0.31725 | 33.65187 | 0 |
| 15607245 |           | 0 | 0     | 0.07957  | 59.74  | 1.06E-06 | 2 | 2048.1624 | -0.73245 | 41.00307 | 0 |
| 15608170 |           | 0 | 0     | 5.1E-05  | 84.11  | 9.51E-09 | 2 | 1261.674  | -0.57345 | 24.82767 | 0 |
| 15608170 |           | 0 | 0     | 7.7E-06  | 82.15  | 1.16E-08 | 2 | 1288.6486 | -0.48433 | 18.72202 | 0 |
| 15608170 |           | 0 | 0     | 0.004868 | 60.38  | 2.52E-06 | 2 | 1030.5728 | 1.31015  | 26.81579 | 0 |
| 15608170 | M1(Oxidat | 0 | 0     | 0.003675 | 60.29  | 2.81E-06 | 2 | 1046.5672 | 0.783486 | 22.54574 | 0 |
| 15608170 |           | 0 | 0     | 0.0918   | 60.24  | 1.42E-06 | 2 | 964.48436 | -0.36261 | 18.8199  | 0 |
| 15608170 |           | 0 | 0     | 4.67E-08 | 57.6   | 2.87E-06 | 3 | 1862.9222 | 0.961926 | 21.2892  | 1 |
| 15608170 |           | 0 | 0     | 0.05188  | 30.13  | 0.00165  | 2 | 1444.7514 | 0.719205 | 17.2618  | 1 |
| 15608877 | M19(Oxid. | 0 | 0     | 0.33457  | 88.31  | 2.51E-09 | 3 | 3158.544  | -1.18276 | 30.20928 | 1 |
| 15608877 | C6(Carban | 0 | 0     | 0.3511   | 74.92  | 3.21E-08 | 2 | 1688.7374 | -0.03139 | 32.92666 | 0 |
| 15608877 | M18(Oxid. | 0 | 0     | 0.5525   | 66.07  | 3.58E-07 | 3 | 3002.4406 | -2.02182 | 31.23917 | 0 |
| 15608877 |           | 0 | 0     | 0.6568   | 60.13  | 1.5E-06  | 3 | 2986.4569 | 1.741874 | 33.83284 | 0 |
| 15608877 |           | 0 | 0     | 0.5555   | 50.08  | 9.82E-06 | 2 | 902.54552 | -0.36841 | 26.44034 | 0 |
| 15608877 | M7(Oxidat | 0 | 0     | 0.68     | 41.54  | 8.07E-05 | 2 | 1036.5719 | -0.16331 | 20.78865 | 1 |
| 15608877 |           | 0 | 0     | 0.66     | 37.05  | 0.000197 | 2 | 1058.6464 | -0.5303  | 23.65205 | 1 |
| 15608877 |           | 0 | 0     | 0.6458   | 31.45  | 0.000931 | 2 | 1020.5779 | 0.652692 | 26.44665 | 1 |
| 15608877 | N-Term(A  | 0 | 0     | 0.6333   | 31.25  | 0.001387 | 2 | 944.55675 | 0.352503 | 34.94224 | 0 |
| 15608884 | C2(Carban | 0 | 0     | 0.01165  | 68.53  | 1.4E-07  | 2 | 1208.5492 | -1.54182 | 14.05298 | 0 |
| 15608884 | C2(Carban | 0 | 0     | 0.008591 | 42.78  | 5.26E-05 | 2 | 1224.545  | -0.85814 | 10.3726  | 0 |
| 15608884 | C3(Carban | 0 | 0     | 0.2567   | 19.47  | 0.02655  | 3 | 1147.5631 | -0.50611 | 12.10258 | 2 |
| 15607816 |           | 0 | 0     | 0.006636 | 89.87  | 1.03E-09 | 3 | 3174.4999 | 0.721294 | 35.21663 | 0 |
| 15607816 |           | 0 | 0     | 0.01952  | 82.25  | 1.28E-08 | 2 | 1815.9087 | 0.191477 | 24.64953 | 0 |
| 15607816 | M12(Oxid. | 0 | 0     | 0.1366   | 41.74  | 6.68E-05 | 3 | 3827.7663 | 0.564099 | 35.44199 | 0 |
| 15607591 |           | 0 | 0     | 0.068358 | 80.34  | 9.23E-09 | 2 | 1955.9039 | 0.477985 | 27.92034 | 0 |
| 15607591 |           | 0 | 0     | 0.1669   | 58.18  | 1.52E-06 | 2 | 1080.4778 | -0.10227 | 26.892   | 0 |
| 15607591 |           | 0 | 0     | 0.2593   | 57.45  | 2.7E-06  | 2 | 1197.6277 | 1.212268 | 32.08222 | 0 |
| 15607591 |           | 0 | 0     | 0.2653   | 57.03  | 3.57E-06 | 2 | 1295.7229 | 1.803387 | 25.5919  | 0 |
| 15607591 |           | 0 | 0     | 0.3255   | 43.39  | 4.57E-05 | 2 | 2501.1482 | -5.27371 | 37.20059 | 0 |
| 15607591 | M8(Oxidat | 0 | 0     | 0.4777   | 31.11  | 0.000773 | 2 | 1096.4726 | -0.25037 | 21.14712 | 0 |
| 15607376 |           | 0 | 0.003 | 0.04188  | 17.89  | 0.016255 | 2 | 941.48332 | -0.66633 | 20.31505 | 0 |
| 15607376 |           | 0 | 0.007 | 0.194    | 26.4   | 0.004353 | 2 | 1176.5912 | 0.274371 | 19.21037 | 0 |
| 15608660 | M10(Oxid. | 0 | 0     | 0.01418  | 68.63  | 2.47E-07 | 2 | 1375.7619 | 0.328632 | 32.46459 | 0 |
| 15608660 |           | 0 | 0     | 0.05795  | 56.73  | 2.23E-06 | 2 | 1359.7677 | 0.901988 | 41.65423 | 0 |

|          |           |   |   |          |        |          |   |           |          |          |   |
|----------|-----------|---|---|----------|--------|----------|---|-----------|----------|----------|---|
| 15608660 |           | 0 | 0 | 0.2657   | 48.99  | 3.28E-05 | 3 | 2603.3629 | 0.456291 | 43.44338 | 0 |
| 15608660 |           | 0 | 0 | 0.2989   | 43.05  | 4.95E-05 | 2 | 1215.591  | 0.327973 | 34.97079 | 0 |
| 15608660 |           | 0 | 0 | 0.2238   | 41.14  | 9.61E-05 | 2 | 1184.5916 | 0.801148 | 16.01596 | 1 |
| 15608660 |           | 0 | 0 | 0.3589   | 28.36  | 0.002553 | 2 | 2038.9938 | -2.15267 | 33.14544 | 1 |
| 15608951 |           | 0 | 0 | 1.27E-07 | 66.2   | 4.92E-07 | 3 | 2600.2738 | -2.15918 | 33.03819 | 0 |
| 15608951 |           | 0 | 0 | 1        | 12.32  | 0.08499  | 3 | 1703.809  | 0.705955 | 34.50431 | 0 |
| 15608136 |           | 0 | 0 | 0.5732   | 33.04  | 0.000495 | 3 | 2672.1661 | -1.06299 | 33.09152 | 0 |
| 15607535 |           | 0 | 0 | 5.32E-10 | 105.98 | 3.28E-11 | 2 | 2208.1873 | 0.068906 | 38.85358 | 1 |
| 15607535 | C3(Carban | 0 | 0 | 1.13E-13 | 102.6  | 6.87E-11 | 2 | 1592.7597 | 0.719414 | 25.97796 | 0 |
| 15607535 |           | 0 | 0 | 2.24E-06 | 92.13  | 1.56E-09 | 2 | 1527.8006 | -0.53449 | 29.71708 | 0 |
| 15607535 |           | 0 | 0 | 1.17E-11 | 85.47  | 2.83E-09 | 5 | 4101.2739 | 0.748972 | 48.86734 | 1 |
| 15607535 | N-Term(A  | 0 | 0 | 0.000597 | 51.65  | 8.55E-06 | 3 | 2250.212  | 6.351824 | 40.40341 | 1 |
| 15607535 |           | 0 | 0 | 5.21E-05 | 49.11  | 1.22E-05 | 2 | 1174.5326 | -0.75002 | 14.84863 | 0 |
| 15607985 |           | 0 | 0 | 5.78E-08 | 135.21 | 8.14E-14 | 2 | 1760.9219 | 0.409614 | 47.81114 | 0 |
| 15607985 | M8(Oxidat | 0 | 0 | 7.43E-12 | 133.95 | 8.26E-14 | 2 | 1776.9191 | 1.687573 | 38.13756 | 0 |
| 15607985 |           | 0 | 0 | 5.77E-07 | 97.7   | 1.78E-10 | 2 | 1712.9823 | 0.949282 | 41.37668 | 1 |
| 15607985 | N-Term(A  | 0 | 0 | 1.33E-05 | 89.08  | 2.04E-09 | 2 | 1144.5951 | -0.52065 | 29.2617  | 0 |
| 15607985 | C1(Carban | 0 | 0 | 5.19E-06 | 89.03  | 1.25E-09 | 2 | 1966.8871 | 1.29253  | 29.12929 | 0 |
| 15607985 | C8(Carban | 0 | 0 | 2.38E-06 | 87.87  | 2.69E-09 | 2 | 2707.2908 | -0.24608 | 33.84649 | 1 |
| 15607985 | C1(Carban | 0 | 0 | 6.62E-08 | 87.7   | 1.69E-09 | 2 | 1950.8888 | -0.42737 | 30.32852 | 0 |
| 15607985 |           | 0 | 0 | 0.000209 | 86.51  | 3.8E-09  | 2 | 1684.8385 | -0.21529 | 30.37818 | 0 |
| 15607985 |           | 0 | 0 | 2.66E-05 | 86.19  | 4.33E-09 | 2 | 873.51445 | -0.96095 | 37.46905 | 0 |
| 15607985 |           | 0 | 0 | 3.09E-06 | 84.2   | 6.08E-09 | 2 | 1485.8448 | 1.543136 | 44.17545 | 0 |
| 15607985 | N-Term(A  | 0 | 0 | 6.22E-05 | 83.96  | 8.44E-09 | 2 | 1300.728  | 1.473461 | 40.66753 | 0 |
| 15607985 |           | 0 | 0 | 1.64E-05 | 82.1   | 1.36E-08 | 2 | 1788.961  | 0.343103 | 33.53082 | 0 |
| 15607985 |           | 0 | 0 | 3.98E-07 | 80.92  | 1.21E-08 | 3 | 1945.0598 | -0.87593 | 33.27588 | 1 |
| 15607985 |           | 0 | 0 | 3.49E-07 | 77.22  | 4.46E-08 | 2 | 1258.7153 | -0.16981 | 39.73797 | 0 |
| 15607985 |           | 0 | 0 | 7.2E-06  | 75.8   | 3.16E-08 | 2 | 2204.2112 | 1.695817 | 35.77255 | 0 |
| 15607985 |           | 0 | 0 | 0.000164 | 75.49  | 4.66E-08 | 2 | 1577.8578 | 2.804045 | 31.01343 | 1 |
| 15607985 |           | 0 | 0 | 1.29E-07 | 75.22  | 5.26E-08 | 2 | 1402.7652 | -0.77489 | 20.77728 | 1 |
| 15607985 | C8(Carban | 0 | 0 | 1.03E-05 | 75.17  | 4.41E-08 | 2 | 2723.2864 | 0.008905 | 32.68176 | 1 |
| 15607985 |           | 0 | 0 | 0.000154 | 71.93  | 7.37E-08 | 2 | 1102.5865 | 1.180932 | 45.08084 | 0 |
| 15607985 |           | 0 | 0 | 9.23E-08 | 69.33  | 1.75E-07 | 3 | 3130.701  | 0.035654 | 39.68839 | 1 |
| 15607985 |           | 0 | 0 | 2.66E-05 | 68.24  | 1.5E-07  | 2 | 2473.3968 | 1.655543 | 35.54476 | 1 |
| 15607985 |           | 0 | 0 | 0.00036  | 67.01  | 4.48E-07 | 2 | 1192.6209 | 0.021724 | 27.99421 | 0 |

|          |           |   |       |          |        |          |   |           |          |          |   |
|----------|-----------|---|-------|----------|--------|----------|---|-----------|----------|----------|---|
| 15607985 |           | 0 | 0     | 0.000127 | 65.03  | 5.5E-07  | 2 | 2615.4141 | -1.73632 | 44.35054 | 1 |
| 15607985 | M17(Oxid: | 0 | 0     | 2.06E-05 | 61.89  | 1.1E-06  | 3 | 2631.4107 | -1.09736 | 42.635   | 1 |
| 15607985 |           | 0 | 0     | 0.001208 | 57.8   | 5.23E-06 | 2 | 929.54033 | -1.25922 | 25.35817 | 0 |
| 15607985 |           | 0 | 0     | 3.27E-06 | 54.91  | 7.59E-06 | 2 | 1997.0242 | -2.85614 | 31.32871 | 1 |
| 15607985 |           | 0 | 0     | 5.77E-05 | 54.65  | 9.94E-06 | 2 | 1246.6641 | -0.83519 | 23.38565 | 0 |
| 15607985 | N-Term(A  | 0 | 0     | 0.000454 | 54.07  | 9.79E-06 | 2 | 1802.9319 | 0.092108 | 45.04561 | 0 |
| 15607985 |           | 0 | 0     | 0.000469 | 46.35  | 4.06E-05 | 3 | 3454.7809 | -0.16916 | 42.51757 | 1 |
| 15607985 | N-Term(A  | 0 | 0     | 0.007202 | 35.53  | 0.000532 | 3 | 1987.0741 | 1.013297 | 38.16168 | 1 |
| 15607985 |           | 0 | 0     | 0.01894  | 35.16  | 0.000533 | 2 | 1473.8005 | -1.98715 | 18.85133 | 1 |
| 15607985 |           | 0 | 0     | 0.002358 | 33.05  | 0.000718 | 3 | 1629.9027 | -1.12168 | 18.83572 | 2 |
| 15607985 |           | 0 | 0     | 0.007577 | 30.14  | 0.001404 | 2 | 986.50072 | -0.71193 | 12.23509 | 0 |
| 15607985 |           | 0 | 0     | 0.004766 | 25.21  | 0.00467  | 4 | 3610.8842 | 0.44717  | 42.37064 | 2 |
| 15607985 | M17(Oxid: | 0 | 0     | 0.04497  | 22.71  | 0.006965 | 4 | 2787.5204 | 2.052056 | 42.53981 | 2 |
| 15607985 |           | 0 | 0     | 0.04748  | 15.54  | 0.027925 | 4 | 3766.9713 | -0.29656 | 42.35787 | 2 |
| 15607985 | N-Term(A  | 0 | 0.002 | 0.07074  | 30.25  | 0.00151  | 2 | 2765.3191 | 8.018639 | 35.77039 | 1 |
| 15607985 |           | 0 | 0.002 | 0.09214  | 28.09  | 0.003959 | 3 | 1897.0254 | 0.148887 | 25.07404 | 1 |
| 15607985 |           | 0 | 0.004 | 0.1314   | 34.63  | 0.000826 | 2 | 1371.7713 | 0.675428 | 24.5778  | 1 |
| 15608459 |           | 0 | 0     | 1.52E-05 | 121.05 | 1.26E-12 | 2 | 1700.8432 | -1.09008 | 25.1599  | 0 |
| 15608459 |           | 0 | 0     | 6.2E-05  | 113.79 | 1E-11    | 2 | 1747.8869 | 0.393114 | 45.95467 | 0 |
| 15608459 |           | 0 | 0     | 5.11E-05 | 104.21 | 7.4E-11  | 2 | 1490.7765 | 0.942835 | 37.03189 | 0 |
| 15608459 | N-Term(A  | 0 | 0     | 6.83E-05 | 101.82 | 1.84E-10 | 2 | 1789.8947 | -1.15391 | 41.214   | 0 |
| 15608459 |           | 0 | 0     | 0.000349 | 93.64  | 8E-10    | 3 | 2714.4693 | 2.498525 | 36.42383 | 0 |
| 15608459 |           | 0 | 0     | 0.00044  | 87.54  | 3.88E-09 | 2 | 2564.3443 | -2.33019 | 37.4432  | 0 |
| 15608459 | M5(Oxidat | 0 | 0     | 0.000852 | 83.66  | 9.26E-09 | 2 | 2580.3448 | -0.15585 | 33.36923 | 0 |
| 15608459 |           | 0 | 0     | 0.004423 | 78.79  | 2.91E-08 | 2 | 1308.696  | 0.946859 | 44.2157  | 0 |
| 15608459 | C2(Carban | 0 | 0     | 0.007245 | 70.2   | 1.43E-07 | 2 | 1281.6716 | -1.34115 | 16.27476 | 1 |
| 15608459 |           | 0 | 0     | 0.01169  | 68.6   | 3.17E-07 | 2 | 1369.7221 | -0.17361 | 29.55022 | 0 |
| 15608459 |           | 0 | 0     | 0.006807 | 66.32  | 4.78E-07 | 3 | 2545.2912 | 0.715668 | 41.39912 | 1 |
| 15608459 |           | 0 | 0     | 0.002302 | 66.03  | 4.24E-07 | 2 | 1368.7229 | -0.1047  | 20.9024  | 0 |
| 15608459 |           | 0 | 0     | 0.00454  | 61.17  | 1.22E-06 | 2 | 1078.5451 | -1.11238 | 29.98044 | 0 |
| 15608459 |           | 0 | 0     | 0.003243 | 57.74  | 3.45E-06 | 2 | 2108.1382 | -0.86812 | 34.14927 | 1 |
| 15608459 |           | 0 | 0     | 0.1902   | 56.92  | 3.56E-06 | 4 | 2840.4877 | 2.573609 | 41.82678 | 1 |
| 15608459 |           | 0 | 0     | 0.02849  | 56.58  | 2.2E-06  | 2 | 1156.57   | -0.51654 | 15.10096 | 0 |
| 15608459 | N-Term(A  | 0 | 0     | 0.006536 | 54.78  | 3.83E-06 | 2 | 1742.8519 | -2.15283 | 24.91849 | 0 |
| 15608459 |           | 0 | 0     | 0.1567   | 46.65  | 6.49E-05 | 2 | 816.42119 | 0.157856 | 13.01288 | 0 |
| 15608459 |           | 0 | 0     | 0.01114  | 46.38  | 4.6E-05  | 2 | 1678.8914 | 0.121342 | 25.65126 | 0 |

|          |           |   |       |          |        |          |   |           |          |          |   |
|----------|-----------|---|-------|----------|--------|----------|---|-----------|----------|----------|---|
| 15608459 |           | 0 | 0     | 0.05334  | 39.98  | 0.000301 | 2 | 816.42113 | 0.095345 | 15.05583 | 0 |
| 15608459 |           | 0 | 0     | 0.09065  | 38.58  | 0.000243 | 2 | 1963.0517 | 0.39838  | 24.15579 | 1 |
| 15608459 |           | 0 | 0     | 0.07157  | 33.43  | 0.000953 | 4 | 2701.3937 | 1.172048 | 36.39362 | 2 |
| 15608459 |           | 0 | 0     | 0.2922   | 33.41  | 0.001003 | 2 | 862.48906 | -0.40584 | 26.07726 | 1 |
| 15608459 |           | 0 | 0     | 0.2629   | 32.71  | 0.001366 | 3 | 1265.6697 | -1.05118 | 16.2096  | 1 |
| 15608459 |           | 0 | 0     | 0.2986   | 22.09  | 0.010506 | 2 | 1953.9687 | -2.62838 | 20.16143 | 1 |
| 15608459 |           | 0 | 0.003 | 0.3684   | 23.38  | 0.005051 | 2 | 824.40105 | 0.093735 | 4.661297 | 0 |
| 15608459 |           | 0 | 0.008 | 0.3932   | 14.39  | 0.080061 | 4 | 2175.1029 | -1.16561 | 29.43022 | 1 |
| 15608071 |           | 0 | 0     | 2.08E-13 | 97.15  | 1.92E-10 | 2 | 2416.1409 | -1.69881 | 30.2013  | 0 |
| 15608071 | M21(Oxid. | 0 | 0     | 1.33E-07 | 90.44  | 9.02E-10 | 2 | 2432.1399 | 0.001594 | 44.48416 | 0 |
| 15608071 |           | 0 | 0     | 1.14E-07 | 61.61  | 9.66E-07 | 3 | 2816.5041 | -0.00987 | 45.39937 | 0 |
| 15608071 |           | 0 | 0     | 1.18E-05 | 28.74  | 0.003609 | 5 | 3934.9788 | -0.90071 | 45.16689 | 0 |
| 15608071 |           | 0 | 0     | 0.000911 | 12.81  | 0.052236 | 3 | 3508.6424 | -1.1378  | 40.44787 | 0 |
| 15608071 |           | 0 | 0.003 | 0.03965  | 30.17  | 0.000959 | 2 | 872.55559 | -0.96465 | 17.96076 | 1 |
| 15607433 | C7(Carban | 0 | 0     | 0.002898 | 88.09  | 1.55E-09 | 2 | 1095.5622 | 0.544093 | 24.33079 | 0 |
| 15607433 |           | 0 | 0     | 0.000635 | 87.68  | 2.47E-09 | 2 | 1296.7267 | -0.27695 | 28.38648 | 0 |
| 15607433 |           | 0 | 0     | 0.000332 | 73.41  | 7.75E-08 | 3 | 2013.0765 | 0.019822 | 40.79504 | 0 |
| 15607433 |           | 0 | 0     | 0.007076 | 67.81  | 3.06E-07 | 2 | 2339.1492 | -0.98488 | 38.84331 | 0 |
| 15607433 |           | 0 | 0     | 0.003314 | 61.43  | 7.18E-07 | 2 | 1297.5795 | -0.97561 | 21.09503 | 0 |
| 15607433 |           | 0 | 0     | 0.05141  | 58.3   | 2.88E-06 | 2 | 1566.8497 | 0.622698 | 31.78828 | 0 |
| 15607433 |           | 0 | 0     | 0.002372 | 56.46  | 4.74E-06 | 3 | 3044.5406 | -1.051   | 37.57315 | 1 |
| 15607433 |           | 0 | 0     | 0.06417  | 55.99  | 3.9E-06  | 3 | 1610.8985 | 0.727164 | 24.74832 | 1 |
| 15607433 |           | 0 | 0     | 0.000109 | 46.84  | 2.07E-05 | 2 | 2533.439  | 0.020187 | 46.54967 | 0 |
| 15607433 |           | 0 | 0     | 0.00043  | 45.55  | 5.71E-05 | 2 | 2378.2063 | -1.53682 | 40.74113 | 0 |
| 15607433 |           | 0 | 0     | 0.01545  | 42.23  | 5.97E-05 | 2 | 880.51189 | 0.780363 | 17.39643 | 1 |
| 15607433 |           | 0 | 0     | 0.01563  | 35.12  | 0.000307 | 3 | 1641.743  | -0.52151 | 21.00141 | 1 |
| 15607433 | M2(Oxidat | 0 | 0     | 0.09195  | 26.52  | 0.002223 | 3 | 1657.7376 | -0.68906 | 19.89533 | 1 |
| 15607433 |           | 0 | 0     | 0.1276   | 23.91  | 0.00691  | 5 | 3214.6873 | 0.100431 | 35.86439 | 0 |
| 15607433 |           | 0 | 0     | 0.05529  | 13.34  | 0.062565 | 2 | 1452.8266 | -1.11893 | 23.22193 | 1 |
| 15607433 |           | 0 | 0     | 0.1669   | 11.39  | 0.13433  | 3 | 1611.8595 | -0.46599 | 25.89953 | 2 |
| 15607433 |           | 0 | 0.003 | 0.2476   | 18.3   | 0.014756 | 2 | 1055.5633 | -0.00121 | 22.96104 | 1 |
| 15607245 |           | 0 | 0     | 4.83E-16 | 120.91 | 1.38E-12 | 3 | 3173.644  | 2.09374  | 49.31247 | 1 |
| 15607245 |           | 0 | 0     | 4.83E-16 | 108.79 | 2.44E-11 | 2 | 1483.8497 | 1.142753 | 40.78781 | 0 |
| 15607245 | M10(Oxid. | 0 | 0     | 4.83E-16 | 107.01 | 3.58E-11 | 3 | 3189.6214 | -3.40267 | 44.49254 | 1 |
| 15607245 |           | 0 | 0     | 4.83E-16 | 104.63 | 8.61E-11 | 2 | 2324.1768 | 0.203991 | 36.99368 | 0 |
| 15607245 |           | 0 | 0     | 4.83E-16 | 102.14 | 6.41E-11 | 2 | 2013.1344 | 0.221402 | 44.18935 | 1 |

|          |           |   |       |          |        |          |   |           |          |          |   |
|----------|-----------|---|-------|----------|--------|----------|---|-----------|----------|----------|---|
| 15607245 | M25(Oxid: | 0 | 0     | 1.59E-12 | 96.52  | 3.01E-10 | 3 | 3344.6836 | -1.67114 | 39.13885 | 1 |
| 15607245 |           | 0 | 0     | 3.27E-14 | 95.41  | 6.47E-10 | 2 | 1015.5522 | -0.90457 | 27.09216 | 0 |
| 15607245 |           | 0 | 0     | 2.76E-11 | 87.22  | 2.85E-09 | 2 | 1462.7919 | 1.241746 | 40.75571 | 0 |
| 15607245 |           | 0 | 0     | 2.52E-15 | 82.3   | 1.03E-08 | 3 | 2270.1311 | -1.01476 | 34.9715  | 0 |
| 15607245 | M16(Oxid: | 0 | 0     | 4.83E-16 | 80.84  | 1.61E-08 | 2 | 2340.1678 | -1.48455 | 34.51656 | 0 |
| 15607245 |           | 0 | 0     | 2.64E-09 | 75.31  | 6.48E-08 | 3 | 2120.0991 | 0.35513  | 33.62181 | 1 |
| 15607245 | C4(Carban | 0 | 0     | 2.1E-15  | 66.76  | 2.53E-07 | 2 | 1398.6797 | 0.178596 | 20.13198 | 0 |
| 15607245 | M19(Oxid: | 0 | 0     | 1.02E-15 | 64.79  | 6.64E-07 | 3 | 2286.1263 | -0.89252 | 30.72579 | 0 |
| 15607245 |           | 0 | 0     | 6.03E-07 | 55.75  | 2.93E-06 | 2 | 1016.5988 | 0.109366 | 30.44244 | 0 |
| 15607245 | M8(Oxidat | 0 | 0     | 4.51E-09 | 50.06  | 2.12E-05 | 3 | 2920.4361 | -3.7758  | 39.93403 | 0 |
| 15607245 |           | 0 | 0     | 0.001325 | 48.5   | 2.75E-05 | 2 | 1002.5591 | 1.245144 | 26.33477 | 0 |
| 15607245 |           | 0 | 0     | 2.06E-05 | 43.39  | 4.57E-05 | 2 | 946.5703  | -1.88284 | 32.84447 | 0 |
| 15607245 |           | 0 | 0     | 2.31E-07 | 42.46  | 0.000111 | 3 | 2904.4544 | 0.777974 | 40.04803 | 0 |
| 15607245 |           | 0 | 0     | 0.000338 | 42.4   | 8.34E-05 | 2 | 1023.535  | -0.77339 | 28.93467 | 0 |
| 15607245 | N-Term(A  | 0 | 0     | 0.000285 | 41.62  | 7.23E-05 | 2 | 1440.6873 | -1.90662 | 20.65301 | 0 |
| 15607245 | N-Term(A  | 0 | 0     | 0.01018  | 40.74  | 0.000181 | 4 | 3231.642  | -0.26699 | 37.99931 | 1 |
| 15607245 | M19(Oxid: | 0 | 0     | 2.15E-05 | 38.34  | 0.000271 | 3 | 2996.5312 | -1.56621 | 34.71262 | 1 |
| 15607245 |           | 0 | 0     | 5E-07    | 36.5   | 0.000437 | 3 | 3328.6988 | 1.377222 | 40.61695 | 1 |
| 15607245 |           | 0 | 0     | 5.86E-12 | 32.38  | 0.001156 | 3 | 2980.5415 | 0.180088 | 39.48021 | 1 |
| 15607245 | N-Term(A  | 0 | 0.005 | 0.09088  | 29.98  | 0.002009 | 2 | 1044.5688 | 0.312937 | 33.11044 | 0 |
| 15608488 |           | 0 | 0     | 4.97E-16 | 109.76 | 1.64E-11 | 2 | 1977.9526 | 0.62739  | 46.40529 | 0 |
| 15608488 |           | 0 | 0     | 4.97E-16 | 95.69  | 6.88E-10 | 3 | 2346.2078 | 1.221769 | 32.26935 | 1 |
| 15608488 |           | 0 | 0     | 4.97E-16 | 85.56  | 5E-09    | 2 | 1623.8726 | 1.524068 | 45.69172 | 0 |
| 15608488 |           | 0 | 0     | 8.86E-11 | 73.74  | 6.55E-08 | 2 | 1138.5743 | 0.303053 | 38.1112  | 0 |
| 15608488 |           | 0 | 0     | 1.53E-09 | 72.64  | 1.12E-07 | 2 | 1222.654  | 0.046589 | 23.59441 | 0 |
| 15608488 |           | 0 | 0     | 3.98E-15 | 72.16  | 9.12E-08 | 2 | 1210.6202 | 2.16706  | 23.05867 | 0 |
| 15608488 |           | 0 | 0     | 4.97E-16 | 69.79  | 2.36E-07 | 2 | 1707.9087 | -2.93476 | 21.15379 | 1 |
| 15608488 |           | 0 | 0     | 1.81E-12 | 69.3   | 1.53E-07 | 3 | 2306.2838 | 0.462358 | 36.03698 | 1 |
| 15608488 |           | 0 | 0     | 7.09E-11 | 68.64  | 2.39E-07 | 2 | 1944.0762 | -0.63363 | 27.05862 | 1 |
| 15608488 |           | 0 | 0     | 1.44E-15 | 67.74  | 4.71E-07 | 2 | 2143.1275 | 0.91348  | 28.08033 | 1 |
| 15608488 |           | 0 | 0     | 1.31E-08 | 66.12  | 2.44E-07 | 2 | 1179.698  | 1.970289 | 23.1235  | 1 |
| 15608488 |           | 0 | 0     | 4.97E-16 | 65.43  | 4.3E-07  | 2 | 3682.9541 | -0.32098 | 39.42589 | 0 |
| 15608488 | N-Term(A  | 0 | 0     | 4.72E-07 | 63.94  | 4.44E-07 | 2 | 1252.6269 | -0.98006 | 23.34272 | 0 |
| 15608488 | N-Term(A  | 0 | 0     | 8.66E-09 | 63.38  | 6.2E-07  | 2 | 1180.5835 | -0.79843 | 26.43731 | 0 |
| 15608488 |           | 0 | 0     | 0.005245 | 60.88  | 8.15E-07 | 2 | 945.56999 | -2.96902 | 31.46719 | 0 |
| 15608488 |           | 0 | 0     | 3.4E-11  | 55.89  | 5.15E-06 | 3 | 1863.9551 | -0.5097  | 28.98604 | 1 |

|          |           |   |       |          |        |          |   |           |          |          |   |
|----------|-----------|---|-------|----------|--------|----------|---|-----------|----------|----------|---|
| 15608488 | N-Term(A  | 0 | 0     | 0.001726 | 53.89  | 4.07E-06 | 2 | 950.57713 | -1.13752 | 29.15726 | 0 |
| 15608488 |           | 0 | 0     | 4.46E-10 | 48.3   | 3.25E-05 | 4 | 3472.7914 | 1.909485 | 45.11687 | 0 |
| 15608488 | C14(Carba | 0 | 0     | 3.06E-05 | 47.93  | 2.09E-05 | 2 | 1689.8091 | -2.0746  | 21.82787 | 1 |
| 15608488 |           | 0 | 0     | 2.34E-05 | 47.18  | 1.91E-05 | 2 | 908.56822 | 0.630187 | 35.24454 | 0 |
| 15608488 |           | 0 | 0     | 0.000713 | 40.48  | 0.000184 | 2 | 1199.6282 | 0.150152 | 17.9298  | 1 |
| 15608488 |           | 0 | 0     | 4.94E-07 | 37.22  | 0.000189 | 3 | 1549.9292 | 0.374879 | 22.09103 | 2 |
| 15608488 |           | 0 | 0     | 0.000658 | 34.57  | 0.000646 | 2 | 1719.9472 | -1.70944 | 26.67102 | 1 |
| 15608488 |           | 0 | 0     | 5.74E-06 | 33.94  | 0.000989 | 3 | 1141.6431 | -0.55294 | 18.17798 | 1 |
| 15608488 |           | 0 | 0     | 5.53E-06 | 30.42  | 0.001498 | 3 | 2262.1126 | 0.690364 | 29.08533 | 1 |
| 15608488 | N-Term(A  | 0 | 0     | 0.000689 | 11.9   | 0.138816 | 3 | 2388.227  | 4.826844 | 34.98921 | 1 |
| 15608488 | N-Term(A  | 0 | 0.002 | 0.04984  | 39.29  | 0.000318 | 2 | 1264.6626 | -1.45576 | 28.91568 | 0 |
| 15608488 |           | 0 | 0.002 | 0.05327  | 38.39  | 0.000159 | 2 | 857.53142 | -0.21181 | 17.7089  | 1 |
| 15608488 |           | 0 | 0.007 | 0.1211   | 25.85  | 0.002594 | 2 | 868.42723 | 0.047623 | 10.62447 | 0 |
| 15608109 |           | 0 | 0     | 5.4E-16  | 111.77 | 1.33E-11 | 2 | 2173.1863 | -0.04804 | 37.97087 | 0 |
| 15608109 |           | 0 | 0     | 5.4E-16  | 92.11  | 1.41E-09 | 2 | 2327.2081 | -0.99084 | 29.55597 | 0 |
| 15608109 |           | 0 | 0     | 5.4E-16  | 89.52  | 1.56E-09 | 2 | 1792.9847 | 1.609294 | 36.21306 | 0 |
| 15608109 |           | 0 | 0     | 5.4E-16  | 89.52  | 2.23E-09 | 2 | 3071.6006 | -0.10345 | 42.83327 | 1 |
| 15608109 |           | 0 | 0     | 5.4E-16  | 87.74  | 4.21E-09 | 2 | 2582.3191 | -0.73264 | 31.88658 | 0 |
| 15608109 | M4(Oxidat | 0 | 0     | 5.4E-16  | 87.09  | 3.32E-09 | 2 | 1813.9045 | -0.21487 | 28.48084 | 0 |
| 15608109 |           | 0 | 0     | 5.4E-16  | 86.53  | 4.56E-09 | 2 | 1797.9076 | -1.27978 | 31.59742 | 0 |
| 15608109 |           | 0 | 0     | 5.4E-16  | 81.02  | 9.88E-09 | 2 | 899.55535 | -0.84025 | 30.92985 | 0 |
| 15608109 |           | 0 | 0     | 5.4E-16  | 80.47  | 2.42E-08 | 2 | 958.53166 | -0.00781 | 21.38716 | 0 |
| 15608109 |           | 0 | 0     | 5.4E-16  | 73.83  | 5.17E-08 | 2 | 1299.7654 | 1.751976 | 26.32089 | 1 |
| 15608109 | M4(Oxidat | 0 | 0     | 5.4E-16  | 69.45  | 1.59E-07 | 2 | 1829.901  | 0.698002 | 25.78253 | 0 |
| 15608109 |           | 0 | 0     | 5.4E-16  | 62.78  | 5.26E-07 | 2 | 917.43236 | -0.00184 | 17.46498 | 0 |
| 15608109 |           | 0 | 0     | 5.4E-16  | 62.65  | 1.09E-06 | 3 | 2710.4134 | -0.97294 | 30.50374 | 1 |
| 15608109 |           | 0 | 0     | 8E-11    | 60.89  | 1.18E-06 | 4 | 2866.5233 | 2.168074 | 30.90465 | 2 |
| 15608109 | N-Term(A  | 0 | 0     | 5.4E-16  | 60.45  | 1.8E-06  | 3 | 2369.2177 | -1.34211 | 37.59951 | 0 |
| 15608109 | M1(Oxidat | 0 | 0     | 9.94E-08 | 58.98  | 3.35E-06 | 2 | 1261.6657 | -1.98887 | 21.01308 | 1 |
| 15608109 |           | 0 | 0     | 9.84E-13 | 54.92  | 8.05E-06 | 2 | 1245.6718 | -1.19676 | 22.24494 | 1 |
| 15608109 |           | 0 | 0     | 5.4E-16  | 50.65  | 1.12E-05 | 2 | 1111.6349 | -0.78803 | 25.71361 | 0 |
| 15608109 |           | 0 | 0     | 1.83E-13 | 49.83  | 1.14E-05 | 2 | 936.50371 | -0.01238 | 26.0892  | 0 |
| 15608109 |           | 0 | 0     | 3.28E-12 | 47.8   | 1.83E-05 | 2 | 1011.568  | -1.45474 | 16.90538 | 1 |
| 15608109 | N-Term(A  | 0 | 0     | 0.02039  | 26.11  | 0.006857 | 2 | 1000.5432 | 0.962631 | 21.95458 | 0 |
| 15608109 |           | 0 | 0     | 0.02574  | 17.65  | 0.017138 | 5 | 3319.7661 | 1.231474 | 38.24192 | 2 |
| 15608460 | C8(Carban | 0 | 0     | 0.002832 | 100.53 | 8.83E-11 | 2 | 2878.3909 | -0.93405 | 30.50221 | 0 |

|              |           |   |   |          |        |          |   |           |          |          |   |
|--------------|-----------|---|---|----------|--------|----------|---|-----------|----------|----------|---|
| 15608460     |           | 0 | 0 | 0.002652 | 87     | 3.99E-09 | 2 | 2476.2205 | 0.074825 | 47.53032 | 0 |
| 15608460     |           | 0 | 0 | 0.00604  | 85.05  | 6.88E-09 | 2 | 1549.7778 | 1.230021 | 31.81965 | 0 |
| 15608460     |           | 0 | 0 | 0.007477 | 81.98  | 1.81E-08 | 2 | 1161.626  | -0.23858 | 47.29808 | 0 |
| 15608460     | C2(Carban | 0 | 0 | 0.01891  | 80.15  | 1.84E-08 | 2 | 1323.6777 | 3.826161 | 23.60005 | 1 |
| 15608460     |           | 0 | 0 | 0.01063  | 80.02  | 2.39E-08 | 2 | 1612.8234 | 0.186354 | 31.72461 | 0 |
| 15608460     |           | 0 | 0 | 0.002568 | 75.71  | 5.1E-08  | 2 | 1694.8389 | 0.243968 | 32.42146 | 0 |
| 15608460     |           | 0 | 0 | 0.01348  | 71.84  | 8.18E-08 | 2 | 988.57921 | 0.605815 | 26.25867 | 0 |
| 15608460     | M5(Oxidat | 0 | 0 | 0.003378 | 70.21  | 1.38E-07 | 2 | 2894.388  | -0.18424 | 28.94287 | 0 |
| 15608460     | N-Term(A  | 0 | 0 | 0.05358  | 53.77  | 1.15E-05 | 2 | 1203.6365 | -0.28588 | 34.39398 | 0 |
| 15608460     | M5(Oxidat | 0 | 0 | 0.01432  | 52.28  | 5.9E-06  | 4 | 4570.2052 | -0.86635 | 35.11406 | 1 |
| 15608460     | C16(Carba | 0 | 0 | 0.03347  | 51.86  | 1.24E-05 | 3 | 1962.9646 | -0.85716 | 22.03752 | 1 |
| 15608459;156 |           | 0 | 0 | 0.1546   | 50.63  | 2.59E-05 | 2 | 816.42095 | -0.14118 | 13.09    | 0 |
| 15608460     | N-Term(A  | 0 | 0 | 0.01902  | 49.32  | 2.16E-05 | 2 | 2518.2376 | 2.664612 | 40.87699 | 0 |
| 15608460     |           | 0 | 0 | 0.05338  | 47.24  | 2.45E-05 | 2 | 1351.6967 | 0.134329 | 24.75494 | 0 |
| 15608460     | N-Term(A  | 0 | 0 | 0.03221  | 46.27  | 5.19E-05 | 2 | 1393.705  | -1.49432 | 22.32159 | 0 |
| 15608459;156 |           | 0 | 0 | 0.1842   | 45.06  | 7.49E-05 | 2 | 1265.6686 | -1.86036 | 15.76128 | 1 |
| 15608460     |           | 0 | 0 | 0.1231   | 43.25  | 0.000102 | 2 | 1170.6265 | 3.31544  | 16.11131 | 1 |
| 15608459;156 |           | 0 | 0 | 0.2118   | 42.14  | 0.000134 | 2 | 862.48937 | -0.052   | 23.30796 | 1 |
| 15608460     | C8(Carban | 0 | 0 | 0.02929  | 40.16  | 9.62E-05 | 4 | 4554.1925 | -4.77356 | 35.89103 | 1 |
| 15608460     |           | 0 | 0 | 0.1699   | 17.96  | 0.046387 | 3 | 1965.032  | 0.939056 | 30.08566 | 1 |
| 15608488     |           | 0 | 0 | 5.26E-16 | 97.02  | 3.08E-10 | 2 | 1977.9518 | 0.257097 | 30.4559  | 0 |
| 15608488     |           | 0 | 0 | 5.26E-16 | 72.77  | 1.08E-07 | 2 | 1623.8669 | -2.00904 | 30.38558 | 0 |
| 15608488     |           | 0 | 0 | 5.26E-16 | 55.82  | 3.67E-06 | 2 | 1210.6187 | 0.957066 | 20.0481  | 0 |
| 15608488     |           | 0 | 0 | 5.26E-16 | 48.53  | 3.51E-05 | 3 | 2346.2049 | -0.02692 | 33.90816 | 1 |
| 15608488     |           | 0 | 0 | 0.02054  | 22.08  | 0.008672 | 3 | 3682.9669 | 3.138981 | 48.91383 | 0 |
| 15608489     |           | 0 | 0 | 3.31E-05 | 125.51 | 6.33E-13 | 2 | 1458.7808 | 0.601884 | 32.31237 | 0 |
| 15608489     |           | 0 | 0 | 6.69E-06 | 113.42 | 7.28E-12 | 2 | 1970.9777 | -0.09263 | 32.64056 | 0 |
| 15608489     |           | 0 | 0 | 8.68E-05 | 103.55 | 1.15E-10 | 2 | 1602.8351 | 1.060188 | 33.80361 | 0 |
| 15608489     |           | 0 | 0 | 0.000714 | 90.36  | 9.18E-10 | 2 | 2093.9556 | 1.534276 | 34.85916 | 0 |
| 15608489     |           | 0 | 0 | 0.001186 | 70.74  | 8.41E-08 | 2 | 1590.9338 | 0.686464 | 40.49837 | 0 |
| 15608489     | C6(Carban | 0 | 0 | 0.001443 | 66.74  | 5.08E-07 | 2 | 2458.2422 | -1.09436 | 33.89854 | 0 |
| 15608489     |           | 0 | 0 | 0.01692  | 59.19  | 2.59E-06 | 2 | 2094.0748 | -0.33269 | 43.53834 | 0 |
| 15608489     |           | 0 | 0 | 0.01127  | 54.08  | 8.01E-06 | 3 | 1801.9619 | -0.59551 | 36.25687 | 0 |
| 15608489     |           | 0 | 0 | 0.01529  | 53.08  | 1.18E-05 | 3 | 2504.3082 | 3.573584 | 38.15256 | 1 |
| 15608489     |           | 0 | 0 | 0.006012 | 51.83  | 2.17E-05 | 2 | 815.4619  | -0.35645 | 21.31143 | 0 |
| 15608489     | M10(Oxid. | 0 | 0 | 0.005222 | 49.72  | 2.77E-05 | 2 | 1817.9571 | -0.47166 | 34.25936 | 0 |

|          |           |   |       |          |        |          |   |           |          |          |   |
|----------|-----------|---|-------|----------|--------|----------|---|-----------|----------|----------|---|
| 15608489 |           | 0 | 0     | 0.07787  | 30.67  | 0.000855 | 2 | 870.42516 | -0.65926 | 30.84161 | 0 |
| 15608489 |           | 0 | 0     | 0.05304  | 30.16  | 0.002458 | 2 | 920.48271 | -1.02955 | 26.46471 | 0 |
| 15608489 |           | 0 | 0     | 0.03633  | 26.2   | 0.005157 | 4 | 3077.5656 | 0.543015 | 45.58755 | 0 |
| 15608489 |           | 0 | 0     | 0.07715  | 20.6   | 0.014371 | 3 | 1399.7066 | -0.82422 | 24.78309 | 1 |
| 15607156 |           | 0 | 0     | 0.001433 | 103.2  | 1.1E-10  | 2 | 1430.7587 | -0.79448 | 29.28662 | 0 |
| 15607156 |           | 0 | 0     | 0.000403 | 90.13  | 2.23E-09 | 2 | 2078.0347 | -1.40793 | 40.69736 | 0 |
| 15607156 |           | 0 | 0     | 0.000238 | 89.86  | 2.12E-09 | 2 | 1466.7846 | -0.28484 | 32.22049 | 0 |
| 15607156 | M12(Oxid  | 0 | 0     | 0.00105  | 77.28  | 3.27E-08 | 2 | 2094.0342 | 0.797975 | 38.21855 | 0 |
| 15607156 |           | 0 | 0     | 0.001426 | 53     | 0.000005 | 2 | 969.44444 | -1.48201 | 16.06612 | 0 |
| 15607156 |           | 0 | 0     | 0.01868  | 48.71  | 1.75E-05 | 2 | 981.49913 | -0.92637 | 19.88373 | 0 |
| 15607156 |           | 0 | 0     | 0.02579  | 34.91  | 0.000549 | 2 | 908.46471 | -1.32427 | 28.5909  | 0 |
| 15607156 |           | 0 | 0     | 0.0429   | 34.79  | 0.000514 | 2 | 1324.6556 | -0.80483 | 21.84161 | 0 |
| 15607156 |           | 0 | 0     | 0.03071  | 31.81  | 0.000658 | 2 | 897.4464  | -0.13773 | 27.6756  | 0 |
| 15607156 | M9(Oxidat | 0 | 0     | 0.03905  | 27.43  | 0.002801 | 2 | 1340.6506 | -0.73547 | 18.98677 | 0 |
| 15607156 |           | 0 | 0     | 0.06039  | 23.52  | 0.005113 | 2 | 899.5667  | -0.70402 | 25.9469  | 1 |
| 15607156 |           | 0 | 0.004 | 0.163    | 20.89  | 0.015479 | 3 | 1423.731  | -1.36306 | 28.8681  | 1 |
| 15607156 |           | 0 | 0.004 | 0.1723   | 15.89  | 0.055391 | 3 | 2819.4118 | -1.87023 | 33.46189 | 0 |
| 15608881 | M3(Oxidat | 0 | 0     | 5.09E-16 | 103.46 | 4.5E-11  | 2 | 1514.6424 | -0.30682 | 26.53812 | 0 |
| 15608881 | C4(Carban | 0 | 0     | 5.09E-16 | 101.66 | 6.81E-11 | 2 | 2277.0569 | 0.174376 | 34.60625 | 0 |
| 15608881 |           | 0 | 0     | 5.09E-16 | 94.22  | 1.1E-09  | 2 | 1646.8366 | 0.470083 | 21.06385 | 0 |
| 15608881 |           | 0 | 0     | 5.09E-16 | 80.92  | 1.5E-08  | 3 | 2807.3835 | 0.429476 | 35.37832 | 0 |
| 15608881 |           | 0 | 0     | 5.09E-16 | 77.71  | 1.69E-08 | 2 | 1498.6482 | 0.206625 | 23.57534 | 0 |
| 15608881 | M23(Oxid  | 0 | 0     | 5.09E-16 | 70.53  | 1.46E-07 | 3 | 2823.3753 | -0.64709 | 34.33698 | 0 |
| 15608881 |           | 0 | 0     | 2.95E-07 | 68.14  | 1.53E-07 | 2 | 1097.4998 | -1.15521 | 16.34462 | 0 |
| 15608881 | M14(Oxid  | 0 | 0     | 5.09E-16 | 60.94  | 1.97E-06 | 2 | 2043.0168 | -2.37642 | 31.17282 | 0 |
| 15608881 | M2(Oxidat | 0 | 0     | 1.56E-14 | 58.9   | 2.19E-06 | 2 | 1497.7244 | -0.69002 | 28.32182 | 0 |
| 15608881 | N-Term(A  | 0 | 0     | 5.09E-16 | 54.91  | 3.22E-06 | 2 | 1540.657  | -0.95172 | 22.46142 | 0 |
| 15608881 |           | 0 | 0     | 2.87E-10 | 54.73  | 3.36E-06 | 2 | 835.47826 | -0.30312 | 19.23026 | 0 |
| 15608881 |           | 0 | 0     | 3.37E-13 | 52.22  | 1.08E-05 | 2 | 1481.7311 | 0.401827 | 30.86251 | 0 |
| 15608881 |           | 0 | 0     | 5.09E-16 | 51.29  | 1.67E-05 | 2 | 2027.0221 | -2.25403 | 34.52909 | 0 |
| 15608881 | M7(Oxidat | 0 | 0     | 1.17E-05 | 49.65  | 1.08E-05 | 3 | 1939.9186 | 0.322652 | 22.63898 | 1 |
| 15608881 |           | 0 | 0     | 9.19E-06 | 46.84  | 2.07E-05 | 2 | 991.57878 | -0.85555 | 16.69003 | 1 |
| 15608881 |           | 0 | 0     | 0.000298 | 44.41  | 3.62E-05 | 2 | 1017.478  | -0.25297 | 15.0296  | 1 |
| 15608881 | C4(Carban | 0 | 0     | 3.03E-09 | 36.73  | 0.000456 | 3 | 2946.4374 | -0.04521 | 35.91409 | 1 |
| 15608881 |           | 0 | 0     | 0.008552 | 32.91  | 0.00051  | 2 | 1783.7898 | -1.01401 | 25.30561 | 1 |
| 15608881 | M3(Oxidat | 0 | 0     | 0.02806  | 30.73  | 0.000843 | 2 | 1799.785  | -0.89266 | 21.80107 | 1 |



|          |           |   |       |          |        |          |   |           |          |          |   |
|----------|-----------|---|-------|----------|--------|----------|---|-----------|----------|----------|---|
| 15608881 |           | 0 | 0     | 0.02353  | 28.58  | 0.003883 | 2 | 1444.7892 | -1.05146 | 21.71777 | 0 |
| 15608881 |           | 0 | 0     | 0.000422 | 28.55  | 0.001955 | 3 | 1923.921  | -1.04873 | 26.39828 | 1 |
| 15608777 | C17(Carba | 0 | 0     | 0.000672 | 81.8   | 8.26E-09 | 2 | 1996.9612 | -0.31851 | 29.53173 | 0 |
| 15608777 |           | 0 | 0     | 0.001426 | 73.73  | 4.23E-08 | 2 | 2197.0552 | -0.41324 | 40.15698 | 0 |
| 15608777 | M31(Oxid. | 0 | 0     | 0.0985   | 32.68  | 0.000538 | 3 | 3293.5125 | -1.32987 | 36.63061 | 0 |
| 15608777 | M13(Oxid. | 0 | 0     | 0.166    | 17.94  | 0.016069 | 3 | 2983.3969 | -3.67586 | 36.08345 | 0 |
| 15607733 |           | 0 | 0     | 0.006845 | 99.9   | 2.3E-10  | 2 | 2068.0176 | -1.27445 | 36.14309 | 0 |
| 15607733 |           | 0 | 0     | 0.007235 | 94.72  | 7.08E-10 | 2 | 1642.9131 | 0.488301 | 39.76945 | 0 |
| 15607733 |           | 0 | 0     | 0.002341 | 83.04  | 1.12E-08 | 2 | 1377.7117 | -0.32211 | 49.30462 | 0 |
| 15607733 |           | 0 | 0     | 0.009934 | 81.32  | 2.1E-08  | 2 | 1101.6053 | 0.082523 | 47.31201 | 0 |
| 15607733 |           | 0 | 0     | 0.01125  | 79.83  | 2.13E-08 | 2 | 1755.9659 | 1.040232 | 45.42495 | 0 |
| 15607733 |           | 0 | 0     | 0.009706 | 79.79  | 1.68E-08 | 2 | 1696.8293 | 0.15908  | 26.66737 | 0 |
| 15607733 | M7(Oxidat | 0 | 0     | 0.00211  | 74.95  | 6.4E-08  | 2 | 2084.0137 | -0.69905 | 31.43102 | 0 |
| 15607733 |           | 0 | 0     | 0.03252  | 68.57  | 2.5E-07  | 2 | 1868.0274 | -0.17663 | 42.34562 | 0 |
| 15607733 |           | 0 | 0     | 0.01798  | 68.28  | 2.67E-07 | 2 | 3012.5333 | 0.600632 | 44.04206 | 0 |
| 15607733 | M5(Oxidat | 0 | 0     | 0.006217 | 67.48  | 1.78E-07 | 2 | 1174.5413 | 0.315923 | 23.24403 | 0 |
| 15607733 |           | 0 | 0     | 0.02581  | 66.67  | 3.44E-07 | 2 | 1896.909  | 0.138038 | 25.90723 | 1 |
| 15607733 | M1(Oxidat | 0 | 0     | 0.0134   | 63.97  | 6.61E-07 | 2 | 2100.0083 | -0.82996 | 28.97033 | 0 |
| 15607733 |           | 0 | 0     | 0.03127  | 63.1   | 8.82E-07 | 3 | 2070.0088 | 0.647765 | 32.1499  | 1 |
| 15607733 |           | 0 | 0     | 0.02495  | 62.58  | 5.51E-07 | 2 | 1158.5456 | -0.38106 | 27.57906 | 0 |
| 15607733 |           | 0 | 0     | 0.006481 | 60.86  | 8.18E-07 | 2 | 1004.5777 | 0.132411 | 25.64781 | 0 |
| 15607733 |           | 0 | 0     | 0.1226   | 45.47  | 4.82E-05 | 2 | 1356.7737 | -0.73119 | 29.38204 | 1 |
| 15607733 |           | 0 | 0     | 0.163    | 45.1   | 5.25E-05 | 2 | 930.47844 | -0.85993 | 24.68254 | 0 |
| 15607733 |           | 0 | 0     | 0.03709  | 44.09  | 3.89E-05 | 2 | 2692.5027 | -0.22958 | 35.02396 | 0 |
| 15607733 |           | 0 | 0     | 0.0361   | 40.23  | 0.000142 | 2 | 822.41002 | -0.56001 | 15.20187 | 0 |
| 15607733 |           | 0 | 0     | 0.01332  | 40.23  | 9.46E-05 | 3 | 2384.3598 | -1.50351 | 29.25561 | 0 |
| 15607733 | M13(Oxid. | 0 | 0     | 0.02502  | 39.11  | 0.00019  | 3 | 2086.0028 | 0.242315 | 29.11117 | 1 |
| 15607733 |           | 0 | 0     | 0.1768   | 38.49  | 0.000368 | 3 | 1919.9936 | 0.05892  | 28.40365 | 1 |
| 15607733 | N-Term(A  | 0 | 0     | 0.1465   | 38.12  | 0.000362 | 2 | 1684.9225 | -0.21565 | 42.49854 | 0 |
| 15607733 |           | 0 | 0     | 0.03552  | 35.15  | 0.000305 | 2 | 1123.5375 | -0.30094 | 45.7627  | 0 |
| 15607733 |           | 0 | 0     | 0.1634   | 25.6   | 0.006059 | 3 | 1685.9315 | -1.14455 | 34.08744 | 1 |
| 15607733 | N-Term(A  | 0 | 0     | 0.09896  | 18.95  | 0.012705 | 3 | 2426.3712 | -1.1529  | 32.83831 | 0 |
| 15607733 | N-Term(A  | 0 | 0.003 | 0.2068   | 25.36  | 0.004657 | 2 | 864.42064 | -0.46903 | 17.48988 | 0 |
| 15607591 |           | 0 | 0     | 9.4E-06  | 107.97 | 1.59E-11 | 2 | 1909.891  | 1.449041 | 32.75833 | 1 |
| 15607591 |           | 0 | 0     | 0.02657  | 103.7  | 8.96E-11 | 2 | 1519.779  | 0.280937 | 34.79953 | 0 |
| 15607591 | M1(Oxidat | 0 | 0     | 0.03346  | 89.97  | 1.01E-09 | 2 | 1925.8852 | 1.034919 | 31.39085 | 1 |

|          |           |   |       |          |       |          |   |           |          |          |   |
|----------|-----------|---|-------|----------|-------|----------|---|-----------|----------|----------|---|
| 15607591 | M8(Oxidat | 0 | 0     | 0.00864  | 83.2  | 4.77E-09 | 2 | 1618.717  | 2.125291 | 19.79748 | 0 |
| 15607591 | N-Term(A  | 0 | 0     | 0.02082  | 81.06 | 7.82E-09 | 2 | 1644.7287 | -0.29853 | 33.3671  | 0 |
| 15607591 | M1(Oxidat | 0 | 0     | 5.65E-05 | 77.96 | 1.6E-08  | 2 | 1634.7077 | -0.46008 | 19.51346 | 0 |
| 15607591 |           | 0 | 0     | 0.009581 | 75.74 | 4.27E-08 | 2 | 1412.8112 | 0.264384 | 38.64307 | 0 |
| 15607591 |           | 0 | 0     | 0.002417 | 73.61 | 4.34E-08 | 2 | 1602.7199 | 0.801719 | 27.73164 | 0 |
| 15607591 |           | 0 | 0     | 0.02692  | 63.29 | 1.01E-06 | 2 | 1193.6047 | -0.20898 | 37.45601 | 0 |
| 15607591 |           | 0 | 0     | 0.03089  | 62.25 | 5.94E-07 | 2 | 1844.8682 | -1.21398 | 29.5207  | 0 |
| 15607591 |           | 0 | 0     | 0.000301 | 61.69 | 1.05E-06 | 3 | 1477.7246 | 1.929097 | 24.48357 | 1 |
| 15607591 | M1(Oxidat | 0 | 0     | 0.05484  | 60.43 | 9.04E-07 | 2 | 1941.8802 | 1.067652 | 25.74599 | 1 |
| 15607591 |           | 0 | 0     | 0.000533 | 53.6  | 8.95E-06 | 3 | 3641.8366 | -1.35873 | 34.16596 | 0 |
| 15607591 | M2(Oxidat | 0 | 0     | 0.01051  | 53.08 | 6.4E-06  | 3 | 2375.1245 | 0.753464 | 32.67188 | 0 |
| 15607591 |           | 0 | 0     | 0.1026   | 52.55 | 6.67E-06 | 2 | 1147.5477 | -1.26904 | 19.19682 | 0 |
| 15607591 | M1(Oxidat | 0 | 0     | 0.000249 | 52.18 | 6.04E-06 | 2 | 1650.7041 | 0.480317 | 14.4727  | 0 |
| 15607591 |           | 0 | 0     | 0.02758  | 48.16 | 2.44E-05 | 2 | 1788.8456 | 0.166226 | 35.20919 | 0 |
| 15607591 | M2(Oxidat | 0 | 0     | 0.01105  | 46.78 | 2.2E-05  | 3 | 2874.3321 | -4.1644  | 37.24889 | 1 |
| 15607591 | M5(Oxidat | 0 | 0     | 0.1104   | 45.93 | 4.21E-05 | 2 | 1535.774  | 0.330179 | 28.14648 | 0 |
| 15607591 | M23(Oxid: | 0 | 0     | 0.00151  | 39.53 | 0.000223 | 3 | 3657.8335 | -0.8303  | 31.65041 | 0 |
| 15607591 | M19(Oxid: | 0 | 0     | 0.07816  | 39.36 | 0.000122 | 3 | 2343.1307 | -0.94569 | 34.48531 | 0 |
| 15607591 |           | 0 | 0     | 0.00399  | 38.43 | 0.000143 | 3 | 2733.2525 | -0.57285 | 33.43372 | 1 |
| 15607591 |           | 0 | 0     | 0.006634 | 36.15 | 0.000267 | 2 | 1996.9369 | -1.53938 | 34.50803 | 0 |
| 15607591 |           | 0 | 0     | 0.07131  | 35.36 | 0.00029  | 2 | 1039.4424 | -1.05911 | 17.65503 | 0 |
| 15607591 | M5(Oxidat | 0 | 0     | 0.01545  | 35.01 | 0.000473 | 3 | 2359.1294 | 0.646996 | 34.13754 | 0 |
| 15607591 | M1(Oxidat | 0 | 0     | 0.03349  | 34.96 | 0.000318 | 3 | 1860.8664 | 0.570646 | 27.67417 | 0 |
| 15607591 |           | 0 | 0     | 0.002968 | 34.83 | 0.000625 | 4 | 2327.1378 | -0.07443 | 39.54426 | 0 |
| 15607591 | M12(Oxid: | 0 | 0     | 0.01187  | 34.14 | 0.000482 | 3 | 3673.8435 | 3.282033 | 30.58516 | 0 |
| 15607591 | C2(Carban | 0 | 0     | 0.04015  | 26.09 | 0.002829 | 2 | 1595.7254 | 0.463799 | 35.7838  | 0 |
| 15607591 |           | 0 | 0     | 0.0702   | 25.97 | 0.003415 | 3 | 2858.3498 | 0.204418 | 40.15745 | 1 |
| 15607591 | M2(Oxidat | 0 | 0     | 0.04909  | 21.7  | 0.008451 | 2 | 2391.1158 | -0.79505 | 28.35679 | 0 |
| 15607591 |           | 0 | 0     | 0.07003  | 18.25 | 0.028428 | 4 | 2659.2938 | 1.418665 | 38.62907 | 1 |
| 15607591 | M6(Oxidat | 0 | 0     | 0.04737  | 17.36 | 0.018322 | 3 | 2906.3298 | -1.41732 | 31.7404  | 1 |
| 15607591 | M1(Oxidat | 0 | 0     | 0.1144   | 11.1  | 0.077441 | 4 | 1876.8589 | -0.73201 | 25.74984 | 0 |
| 15607591 |           | 0 | 0.004 | 0.1978   | 49.8  | 3.04E-05 | 2 | 1131.6044 | -0.0827  | 32.94816 | 0 |
| 15607591 | M15(Oxid: | 0 | 0.004 | 0.1293   | 30.09 | 0.002106 | 3 | 1960.0146 | -1.20192 | 36.70842 | 1 |
| 15607591 |           | 0 | 0.004 | 0.1313   | 28.18 | 0.003497 | 2 | 798.49858 | 0.10201  | 27.0117  | 0 |
| 15607425 |           | 0 | 0     | 2.01E-11 | 102.8 | 1.08E-10 | 2 | 2220.1109 | 1.363059 | 33.01094 | 1 |
| 15607425 |           | 0 | 0     | 5.81E-12 | 93.68 | 5.14E-10 | 2 | 1594.9362 | 0.748322 | 46.40479 | 0 |

|          |           |   |       |          |        |          |   |           |          |          |   |
|----------|-----------|---|-------|----------|--------|----------|---|-----------|----------|----------|---|
| 15607425 | M5(Oxidat | 0 | 0     | 5.61E-16 | 85.44  | 3.71E-09 | 2 | 1610.9317 | 1.09373  | 40.21957 | 0 |
| 15607425 | M4(Oxidat | 0 | 0     | 5.61E-16 | 83.16  | 8.21E-09 | 2 | 3055.5342 | 1.13924  | 40.33176 | 0 |
| 15607425 |           | 0 | 0     | 7.46E-06 | 78.6   | 2.14E-08 | 2 | 1082.5961 | 0.716458 | 27.89785 | 0 |
| 15607425 | M10(Oxid  | 0 | 0     | 5.61E-16 | 73.88  | 5.93E-08 | 2 | 2079.9983 | -1.59504 | 31.2187  | 0 |
| 15607425 | M9(Oxidat | 0 | 0     | 0.000654 | 73.51  | 9.58E-08 | 2 | 1583.8553 | -1.38529 | 28.68977 | 0 |
| 15607425 |           | 0 | 0     | 4.72E-07 | 72.76  | 5.3E-08  | 2 | 1763.9788 | -0.87526 | 36.27932 | 0 |
| 15607425 |           | 0 | 0     | 4.16E-05 | 69.54  | 1.89E-07 | 2 | 2064.0069 | 0.068913 | 34.76883 | 0 |
| 15607425 |           | 0 | 0     | 4.61E-08 | 69.42  | 2E-07    | 3 | 1342.6893 | -0.28088 | 21.33755 | 0 |
| 15607425 |           | 0 | 0     | 9.37E-06 | 67.94  | 2.41E-07 | 2 | 1567.8625 | -0.04908 | 33.81679 | 0 |
| 15607425 |           | 0 | 0     | 7.33E-07 | 65.25  | 6.87E-07 | 2 | 2371.1536 | -1.2438  | 38.06499 | 0 |
| 15607425 | M6(Oxidat | 0 | 0     | 0.000163 | 63.97  | 1.12E-06 | 3 | 1358.683  | -1.16197 | 18.26591 | 0 |
| 15607425 |           | 0 | 0     | 0.005959 | 63.14  | 4.84E-07 | 2 | 920.51982 | -0.23716 | 28.93573 | 0 |
| 15607425 |           | 0 | 0     | 5.83E-05 | 59.93  | 1.83E-06 | 3 | 1415.7126 | -0.93396 | 16.19851 | 0 |
| 15607425 |           | 0 | 0     | 9.42E-05 | 59.21  | 1.2E-06  | 2 | 875.53136 | 0.488085 | 21.15107 | 1 |
| 15607425 |           | 0 | 0     | 0.005537 | 58.39  | 3.62E-06 | 2 | 1058.5448 | -0.35322 | 25.74776 | 0 |
| 15607425 | M11(Oxid  | 0 | 0     | 1.76E-05 | 57.41  | 3.81E-06 | 2 | 2236.0979 | -2.15926 | 30.06682 | 1 |
| 15607425 |           | 0 | 0     | 0.000547 | 57.16  | 1.92E-06 | 2 | 1110.4799 | -1.05837 | 15.59789 | 0 |
| 15607425 |           | 0 | 0     | 0.000123 | 52.06  | 1.4E-05  | 3 | 3039.5352 | -0.21085 | 48.16008 | 0 |
| 15607425 |           | 0 | 0     | 8.86E-09 | 46.42  | 4.45E-05 | 3 | 1774.883  | -0.07411 | 26.47363 | 1 |
| 15607425 |           | 0 | 0     | 0.001349 | 46.31  | 5.96E-05 | 3 | 2527.2678 | 4.001983 | 36.61095 | 1 |
| 15607425 |           | 0 | 0     | 0.002399 | 37.57  | 0.000175 | 2 | 1076.6211 | -0.01853 | 27.47497 | 1 |
| 15607425 |           | 0 | 0     | 0.000261 | 34.99  | 0.000507 | 2 | 1723.9627 | -0.56684 | 29.62183 | 1 |
| 15607425 |           | 0 | 0     | 6.92E-06 | 27.14  | 0.002222 | 3 | 2827.5547 | -1.10684 | 34.90263 | 1 |
| 15607425 | M4(Oxidat | 0 | 0.003 | 0.03961  | 46.34  | 4.76E-05 | 2 | 1074.5398 | -0.2734  | 20.86659 | 0 |
| 15608447 |           | 0 | 0     | 0.1835   | 112.98 | 5.02E-12 | 2 | 2233.2522 | -1.30591 | 47.33485 | 0 |
| 15608447 |           | 0 | 0     | 0.2944   | 103.2  | 8.62E-11 | 2 | 1671.8172 | -0.79257 | 24.51376 | 0 |
| 15608447 |           | 0 | 0     | 0.4142   | 95.85  | 3.25E-10 | 2 | 1505.7232 | 0.033758 | 30.85833 | 0 |
| 15608447 |           | 0 | 0     | 0.3298   | 93.61  | 7.19E-10 | 2 | 1200.5972 | 0.336722 | 18.87972 | 0 |
| 15608447 |           | 0 | 0     | 0.3319   | 81.76  | 1.1E-08  | 2 | 1639.7786 | 0.159017 | 15.34457 | 0 |
| 15608447 |           | 0 | 0     | 0.2223   | 79.29  | 2.47E-08 | 2 | 1872.0226 | -0.01105 | 47.9309  | 0 |
| 15608447 |           | 0 | 0     | 0.4671   | 74.48  | 7.66E-08 | 2 | 1042.5893 | 0.086033 | 28.49692 | 0 |
| 15608447 |           | 0 | 0     | 0.5729   | 66.04  | 3.61E-07 | 2 | 1054.6252 | -0.39031 | 28.69952 | 0 |
| 15608447 | C8(Carban | 0 | 0     | 0.3087   | 62.05  | 1.03E-06 | 2 | 1554.8321 | 0.735481 | 32.26523 | 0 |
| 15608447 |           | 0 | 0     | 0.3714   | 49.75  | 2.33E-05 | 3 | 1812.888  | 0.250065 | 36.12445 | 0 |
| 15608447 |           | 0 | 0     | 0.5035   | 48.43  | 3.01E-05 | 2 | 1332.679  | -0.34414 | 23.52352 | 0 |
| 15608447 |           | 0 | 0     | 0.587    | 37.87  | 0.000343 | 3 | 1941.0137 | -0.63641 | 27.41237 | 1 |

|          |           |   |   |          |        |          |   |           |          |          |   |
|----------|-----------|---|---|----------|--------|----------|---|-----------|----------|----------|---|
| 15608447 | M12(Oxid: | 0 | 0 | 0.5727   | 30.48  | 0.002059 | 4 | 3531.7775 | -0.42465 | 49.64066 | 0 |
| 15608447 |           | 0 | 0 | 0.6553   | 26.6   | 0.003719 | 3 | 1171.6799 | 0.395108 | 19.81075 | 1 |
| 15608323 |           | 0 | 0 | 0.003523 | 93.95  | 7.65E-10 | 2 | 1164.5756 | -0.03622 | 49.38722 | 0 |
| 15608323 | M8(Oxidat | 0 | 0 | 0.009899 | 93.21  | 1.22E-09 | 2 | 1547.7781 | 3.009133 | 48.99315 | 0 |
| 15608323 |           | 0 | 0 | 0.006179 | 80.1   | 2.59E-08 | 2 | 1598.8516 | 1.162584 | 31.94137 | 0 |
| 15608323 | N-Term(A  | 0 | 0 | 0.2251   | 73.96  | 6.43E-08 | 2 | 1484.7702 | -0.15295 | 46.39405 | 0 |
| 15608323 |           | 0 | 0 | 0.1578   | 50.34  | 2.27E-05 | 2 | 1442.7583 | -1.0417  | 37.18359 | 0 |
| 15608323 |           | 0 | 0 | 0.2662   | 28.14  | 0.00445  | 2 | 1156.6506 | -0.17378 | 27.31328 | 0 |
| 15607425 | M13(Oxid: | 0 | 0 | 0.010644 | 100.2  | 1.62E-10 | 2 | 1789.9416 | 0.569638 | 35.72299 | 0 |
| 15607425 |           | 0 | 0 | 0.1246   | 88.23  | 3.61E-09 | 2 | 1773.9438 | -1.05309 | 38.72027 | 0 |
| 15607425 |           | 0 | 0 | 0.02857  | 87.04  | 3.46E-09 | 2 | 2081.0171 | 1.194677 | 31.42439 | 0 |
| 15607425 |           | 0 | 0 | 0.06674  | 83.07  | 9.86E-09 | 2 | 1537.7836 | -1.38145 | 45.18737 | 0 |
| 15607425 |           | 0 | 0 | 0.06124  | 72.43  | 8.29E-08 | 2 | 1137.6414 | -0.14616 | 37.32951 | 0 |
| 15607425 |           | 0 | 0 | 0.03235  | 70.77  | 1.88E-07 | 2 | 2020.023  | -0.8735  | 32.84376 | 0 |
| 15607425 |           | 0 | 0 | 0.01773  | 68.64  | 3.69E-07 | 3 | 2335.2312 | 0.780646 | 39.40195 | 0 |
| 15607425 | M18(Oxid: | 0 | 0 | 0.09087  | 66.49  | 5.5E-07  | 3 | 2432.2399 | 0.824761 | 38.48955 | 1 |
| 15607425 |           | 0 | 0 | 0.2032   | 64.33  | 4.24E-07 | 2 | 1070.6207 | 0.151097 | 30.06602 | 0 |
| 15607425 |           | 0 | 0 | 0.03549  | 60.47  | 1.08E-06 | 2 | 1594.9345 | -0.32319 | 46.38641 | 0 |
| 15607425 |           | 0 | 0 | 0.0561   | 57.93  | 3.95E-06 | 2 | 1315.7111 | 0.506091 | 31.07917 | 0 |
| 15607425 |           | 0 | 0 | 0.07903  | 55.06  | 4.68E-06 | 2 | 1253.6015 | -0.57695 | 22.08432 | 0 |
| 15607425 | C8(Carban | 0 | 0 | 0.02574  | 52.67  | 6.22E-06 | 3 | 1548.7679 | -1.36744 | 17.79867 | 0 |
| 15607425 |           | 0 | 0 | 0.02926  | 51.35  | 7.31E-06 | 3 | 2904.3334 | -0.10781 | 40.88713 | 0 |
| 15607425 |           | 0 | 0 | 0.05692  | 49.24  | 1.43E-05 | 3 | 2346.2765 | 1.973798 | 41.93273 | 0 |
| 15607425 |           | 0 | 0 | 0.1223   | 48.65  | 1.36E-05 | 2 | 1108.6476 | 0.242914 | 24.75167 | 0 |
| 15607425 |           | 0 | 0 | 0.04582  | 44.25  | 9.02E-05 | 3 | 2656.4114 | 0.707259 | 45.2879  | 1 |
| 15607425 |           | 0 | 0 | 0.07584  | 43.17  | 8.43E-05 | 3 | 1323.6697 | 0.332461 | 33.84401 | 0 |
| 15607425 |           | 0 | 0 | 0.1898   | 41.44  | 7.16E-05 | 2 | 1566.7377 | -1.14429 | 23.09819 | 1 |
| 15607425 |           | 0 | 0 | 0.1453   | 39.42  | 0.000314 | 2 | 1474.7536 | -0.07029 | 22.43539 | 0 |
| 15607425 |           | 0 | 0 | 0.166    | 34.98  | 0.000921 | 2 | 832.45207 | -0.32114 | 22.74817 | 0 |
| 15607425 |           | 0 | 0 | 0.2221   | 17.8   | 0.022404 | 3 | 2367.3149 | 0.770165 | 40.19703 | 1 |
| 15607566 |           | 0 | 0 | 5.22E-16 | 114.08 | 5.47E-12 | 2 | 2112.1778 | -1.65674 | 46.23584 | 0 |
| 15607566 | M16(Oxid: | 0 | 0 | 5.22E-16 | 103.76 | 9.26E-11 | 2 | 1999.0645 | 0.142278 | 46.30428 | 0 |
| 15607566 |           | 0 | 0 | 5.22E-16 | 100.98 | 1.72E-10 | 2 | 2067.0806 | -1.15491 | 34.73964 | 0 |
| 15607566 |           | 0 | 0 | 2.72E-11 | 99.79  | 1.05E-10 | 2 | 1094.6449 | 1.81224  | 18.78308 | 1 |
| 15607566 |           | 0 | 0 | 5.84E-16 | 97.33  | 3.98E-10 | 2 | 2267.222  | -3.10065 | 42.80557 | 1 |
| 15607566 |           | 0 | 0 | 5.22E-16 | 91.27  | 1.12E-09 | 2 | 1983.0696 | 0.164582 | 49.98752 | 0 |

|          |           |   |   |          |        |          |   |           |          |          |   |
|----------|-----------|---|---|----------|--------|----------|---|-----------|----------|----------|---|
| 15607566 |           | 0 | 0 | 5.22E-16 | 89.99  | 1.9E-09  | 3 | 2223.1858 | 0.766408 | 29.7421  | 1 |
| 15607566 |           | 0 | 0 | 7.02E-13 | 83.8   | 5.63E-09 | 2 | 1853.0308 | 1.493778 | 41.95813 | 0 |
| 15607566 |           | 0 | 0 | 9.27E-12 | 78.2   | 1.51E-08 | 2 | 1041.5319 | -0.48328 | 16.45635 | 0 |
| 15607566 |           | 0 | 0 | 2.7E-10  | 69.74  | 1.75E-07 | 2 | 1169.6253 | -1.78652 | 15.911   | 1 |
| 15607566 |           | 0 | 0 | 3.89E-06 | 67.81  | 3.64E-07 | 2 | 1496.8061 | -0.49668 | 32.3711  | 0 |
| 15607566 |           | 0 | 0 | 6.98E-11 | 67.75  | 2.1E-07  | 2 | 2009.1253 | -1.92599 | 40.36609 | 1 |
| 15607566 |           | 0 | 0 | 2.86E-08 | 58.1   | 2.32E-06 | 2 | 1452.7699 | 0.401825 | 29.26991 | 0 |
| 15607566 | N-Term(A  | 0 | 0 | 1.58E-05 | 52.4   | 1.41E-05 | 2 | 2041.0744 | -0.19249 | 43.14348 | 0 |
| 15607566 |           | 0 | 0 | 4.27E-08 | 52.34  | 5.82E-06 | 2 | 1106.6696 | 1.348156 | 41.80804 | 0 |
| 15607566 |           | 0 | 0 | 1.26E-07 | 52.32  | 1.11E-05 | 2 | 1094.5577 | -1.17537 | 16.71417 | 0 |
| 15607566 | C1(Carban | 0 | 0 | 1.53E-06 | 52.08  | 1.61E-05 | 3 | 2853.4118 | -0.16401 | 39.79854 | 0 |
| 15607566 |           | 0 | 0 | 3.54E-05 | 43.64  | 4.31E-05 | 2 | 960.57213 | -0.35519 | 27.85476 | 0 |
| 15607566 |           | 0 | 0 | 2.92E-06 | 43.27  | 4.7E-05  | 2 | 938.54167 | -0.17871 | 18.05742 | 0 |
| 15607566 |           | 0 | 0 | 6.97E-08 | 42.25  | 0.000113 | 5 | 4140.0737 | 0.07135  | 45.0146  | 0 |
| 15607566 | M18(Oxid: | 0 | 0 | 1.75E-06 | 41.05  | 0.000165 | 4 | 2283.2216 | -1.02398 | 41.45442 | 1 |
| 15607566 |           | 0 | 0 | 0.000277 | 37.92  | 0.000161 | 2 | 1234.7616 | -1.1638  | 22.01495 | 1 |
| 15607566 | C1(Carban | 0 | 0 | 5.4E-07  | 37.32  | 0.000297 | 3 | 2869.3888 | -6.38889 | 37.42968 | 0 |
| 15607566 |           | 0 | 0 | 0.002354 | 35.64  | 0.000272 | 2 | 947.57848 | -0.08815 | 41.13774 | 0 |
| 15607566 |           | 0 | 0 | 0.000765 | 35.07  | 0.000327 | 2 | 955.49883 | -0.84187 | 18.17436 | 0 |
| 15607566 | N-Term(A  | 0 | 0 | 0.01004  | 31.1   | 0.000774 | 2 | 989.59032 | 1.204837 | 29.07921 | 0 |
| 15607566 | C2(Carban | 0 | 0 | 0.05572  | 17.58  | 0.044518 | 3 | 3009.5213 | 2.628022 | 38.21663 | 1 |
| 15607566 | N-Term(A  | 0 | 0 | 0.006755 | 14.21  | 0.055001 | 3 | 2154.1919 | 0.00991  | 44.58811 | 0 |
| 15607377 |           | 0 | 0 | 0.000185 | 123.99 | 3.98E-13 | 3 | 3811.8519 | -1.17514 | 41.82647 | 0 |
| 15607377 |           | 0 | 0 | 0.001207 | 103.36 | 6.69E-11 | 3 | 1920.0498 | 0.670037 | 32.56248 | 1 |
| 15607377 |           | 0 | 0 | 0.000962 | 102.9  | 1.38E-10 | 2 | 2017.0066 | -3.58051 | 28.61274 | 0 |
| 15607377 |           | 0 | 0 | 0.006608 | 93.67  | 8.59E-10 | 2 | 1686.9281 | -0.31603 | 26.21674 | 0 |
| 15607377 |           | 0 | 0 | 0.002645 | 91.53  | 1.16E-09 | 2 | 1416.8046 | -0.78929 | 27.39881 | 0 |
| 15607377 |           | 0 | 0 | 0.0147   | 87.52  | 1.77E-09 | 2 | 1034.5978 | -1.46471 | 33.50044 | 0 |
| 15607377 |           | 0 | 0 | 0.000411 | 86.29  | 4.35E-09 | 3 | 2681.3218 | -0.10101 | 29.32684 | 1 |
| 15607377 | M13(Oxid: | 0 | 0 | 0.001678 | 81.46  | 1.14E-08 | 3 | 1936.0413 | -1.09108 | 26.72123 | 1 |
| 15607377 |           | 0 | 0 | 0.004773 | 80.63  | 9.51E-09 | 2 | 1054.5885 | -0.61894 | 40.0199  | 0 |
| 15607377 | M12(Oxid: | 0 | 0 | 0.0235   | 78.54  | 3.08E-08 | 2 | 1779.9445 | 1.24684  | 29.52623 | 0 |
| 15607377 |           | 0 | 0 | 0.003673 | 76.15  | 5.7E-08  | 2 | 2010.0082 | 0.082094 | 39.98633 | 0 |
| 15607377 |           | 0 | 0 | 0.01711  | 67.96  | 2.24E-07 | 2 | 1761.9877 | 1.054035 | 31.05975 | 0 |
| 15607377 |           | 0 | 0 | 0.01169  | 64.72  | 7.08E-07 | 2 | 1763.95   | 1.489538 | 32.69693 | 0 |
| 15607377 |           | 0 | 0 | 0.07929  | 56.74  | 6.78E-06 | 2 | 788.42656 | 0.545353 | 14.92286 | 0 |

|          |           |   |       |          |        |          |   |           |          |          |   |
|----------|-----------|---|-------|----------|--------|----------|---|-----------|----------|----------|---|
| 15607377 |           | 0 | 0     | 0.07237  | 56.36  | 3.01E-06 | 2 | 1024.5463 | 0.079008 | 29.97135 | 0 |
| 15607377 |           | 0 | 0     | 0.00663  | 56.3   | 5.04E-06 | 2 | 2318.1775 | -1.78307 | 34.19262 | 0 |
| 15607377 |           | 0 | 0     | 0.06757  | 55.6   | 6.06E-06 | 4 | 2552.3307 | 1.942492 | 38.63136 | 0 |
| 15607377 |           | 0 | 0     | 0.09165  | 45.51  | 2.81E-05 | 2 | 1046.4743 | -0.62165 | 17.06159 | 0 |
| 15607377 |           | 0 | 0     | 0.04952  | 44.82  | 3.29E-05 | 3 | 1742.8192 | -0.74206 | 16.35413 | 1 |
| 15607377 |           | 0 | 0     | 0.06791  | 44.64  | 6.7E-05  | 2 | 1145.58   | -0.93197 | 12.07119 | 0 |
| 15607377 |           | 0 | 0     | 0.07733  | 43.66  | 7.96E-05 | 2 | 1337.7428 | 0.332015 | 30.54013 | 0 |
| 15607377 |           | 0 | 0     | 0.03233  | 38.23  | 0.000271 | 4 | 3484.8019 | 0.149015 | 47.97169 | 0 |
| 15607377 |           | 0 | 0     | 0.1134   | 18.08  | 0.015523 | 5 | 4803.5203 | -1.16775 | 47.43708 | 1 |
| 15607377 |           | 0 | 0     | 0.1227   | 12.25  | 0.092328 | 4 | 3715.9774 | 2.119603 | 38.22539 | 1 |
| 15607377 |           | 0 | 0.003 | 0.1791   | 31.55  | 0.000698 | 2 | 1062.6545 | 1.265928 | 23.83502 | 0 |
| 15607377 |           | 0 | 0.005 | 0.1973   | 37.44  | 0.00055  | 2 | 900.51457 | -0.43013 | 19.89935 | 0 |
| 15607377 |           | 0 | 0     | 5.41E-16 | 104.58 | 3.48E-11 | 3 | 3811.8537 | -0.69478 | 45.58734 | 0 |
| 15607377 |           | 0 | 0     | 5.42E-16 | 100.85 | 1.64E-10 | 2 | 1686.9297 | 0.624684 | 32.58909 | 0 |
| 15607377 |           | 0 | 0     | 5.42E-16 | 99.99  | 1.6E-10  | 3 | 1920.047  | -0.76044 | 30.43096 | 1 |
| 15607377 |           | 0 | 0     | 9.61E-16 | 93.45  | 4.51E-10 | 2 | 1034.5984 | -0.87476 | 30.03387 | 0 |
| 15607377 | M13(Oxid: | 0 | 0     | 5.42E-16 | 93.19  | 7.92E-10 | 3 | 1936.0462 | 1.462499 | 27.94767 | 1 |
| 15607377 |           | 0 | 0     | 5.42E-16 | 88.21  | 2.49E-09 | 2 | 1416.8041 | -1.13393 | 28.21383 | 0 |
| 15607377 |           | 0 | 0     | 5.42E-16 | 84.87  | 7.66E-09 | 2 | 2010.0087 | 0.325019 | 34.46095 | 0 |
| 15607377 |           | 0 | 0     | 5.42E-16 | 84.29  | 7.26E-09 | 3 | 2681.3157 | -2.35456 | 31.29341 | 1 |
| 15607377 |           | 0 | 0     | 1.25E-13 | 83.57  | 4.83E-09 | 2 | 1054.5889 | -0.27168 | 33.43768 | 0 |
| 15607377 |           | 0 | 0     | 5.42E-16 | 80.03  | 2.98E-08 | 2 | 2017.0114 | -1.2202  | 30.24422 | 0 |
| 15607377 | M12(Oxid: | 0 | 0     | 1.55E-14 | 78.72  | 3.02E-08 | 2 | 1779.9406 | -0.94775 | 34.2387  | 0 |
| 15607377 |           | 0 | 0     | 5.42E-16 | 69.91  | 1.38E-07 | 2 | 1761.9883 | 1.400434 | 30.49381 | 0 |
| 15607377 |           | 0 | 0     | 2.67E-11 | 65.24  | 6.28E-07 | 2 | 1763.9496 | 1.28193  | 33.39788 | 0 |
| 15607377 | N-Term(A  | 0 | 0     | 5.42E-16 | 59.84  | 2.54E-06 | 2 | 2059.0201 | -2.11711 | 31.92318 | 0 |
| 15607377 |           | 0 | 0     | 8.23E-09 | 58.18  | 2.13E-06 | 2 | 1024.5452 | -0.9933  | 42.07958 | 0 |
| 15607377 |           | 0 | 0     | 1.08E-12 | 50.37  | 1.93E-05 | 2 | 2318.178  | -1.57244 | 35.25908 | 0 |
| 15607377 |           | 0 | 0     | 8.61E-15 | 47.68  | 3.33E-05 | 5 | 3484.8115 | 2.912467 | 45.05658 | 0 |
| 15607377 |           | 0 | 0     | 5.11E-05 | 46.64  | 4.01E-05 | 2 | 1337.7438 | 1.062022 | 29.41124 | 0 |
| 15607377 |           | 0 | 0     | 8.69E-06 | 45.91  | 8.21E-05 | 2 | 788.42674 | 0.777594 | 15.58859 | 0 |
| 15607377 |           | 0 | 0     | 0.1259   | 45.1   | 3.08E-05 | 2 | 1062.6528 | -0.34229 | 20.64691 | 0 |
| 15607377 |           | 0 | 0     | 0.007216 | 43.73  | 0.000129 | 2 | 900.51427 | -0.76902 | 20.17902 | 0 |
| 15607377 |           | 0 | 0     | 1.32E-09 | 43.26  | 0.000123 | 2 | 1021.5163 | -1.09479 | 12.73508 | 0 |
| 15607377 |           | 0 | 0     | 9.97E-07 | 41.63  | 6.85E-05 | 2 | 1046.4745 | -0.38835 | 17.53162 | 0 |
| 15607377 |           | 0 | 0     | 0.00327  | 38.29  | 0.000148 | 3 | 1742.8198 | -0.42687 | 17.12169 | 1 |

|          |           |   |   |          |        |          |   |           |          |          |   |
|----------|-----------|---|---|----------|--------|----------|---|-----------|----------|----------|---|
| 15607377 |           | 0 | 0 | 3.5E-08  | 37.67  | 0.000291 | 2 | 1145.5794 | -1.46476 | 12.66521 | 0 |
| 15607377 |           | 0 | 0 | 2.21E-10 | 32.34  | 0.001342 | 3 | 2552.3276 | 0.728173 | 39.50536 | 0 |
| 15607377 |           | 0 | 0 | 3.53E-10 | 29.11  | 0.001225 | 5 | 4803.5322 | 1.309978 | 43.95697 | 1 |
| 15607377 | N-Term(A  | 0 | 0 | 0.001945 | 24.51  | 0.00708  | 3 | 1728.9386 | -0.39015 | 34.58893 | 0 |
| 15607377 |           | 0 | 0 | 0.000243 | 20.65  | 0.016359 | 4 | 1588.7942 | 0.162928 | 15.57018 | 1 |
| 15607377 |           | 0 | 0 | 4.9E-06  | 19.51  | 0.011168 | 4 | 3433.8288 | 1.71376  | 41.7151  | 1 |
| 15609300 |           | 0 | 0 | 0.1004   | 41.34  | 0.000187 | 2 | 1130.6274 | -0.29573 | 16.39129 | 1 |
| 15609300 |           | 0 | 0 | 0.3206   | 37.7   | 0.000178 | 2 | 783.41423 | -0.77753 | 26.01891 | 0 |
| 15609300 |           | 0 | 0 | 0.122    | 37.04  | 0.000346 | 2 | 1194.6335 | -0.32717 | 13.91742 | 0 |
| 15609300 |           | 0 | 0 | 0.2743   | 34.47  | 0.001    | 2 | 873.47875 | -0.17742 | 16.71107 | 0 |
| 15609300 |           | 0 | 0 | 0.1916   | 26.2   | 0.005397 | 3 | 1520.8395 | -0.68392 | 16.63572 | 1 |
| 15609909 |           | 0 | 0 | 4.1E-11  | 119.75 | 2.54E-12 | 2 | 1668.8803 | -0.05673 | 37.72687 | 0 |
| 15609909 |           | 0 | 0 | 2.7E-10  | 94.65  | 6.68E-10 | 2 | 1119.5793 | -0.08938 | 41.20281 | 0 |
| 15609909 | N-Term(A  | 0 | 0 | 0.001621 | 74.29  | 7.45E-08 | 2 | 1161.5894 | -0.45905 | 38.89226 | 0 |
| 15609909 |           | 0 | 0 | 0.003675 | 63.39  | 4.57E-07 | 2 | 1364.5599 | -0.21197 | 25.33473 | 0 |
| 15609909 |           | 0 | 0 | 0.01464  | 63.04  | 1.09E-06 | 2 | 1516.8232 | 0.017415 | 30.57073 | 1 |
| 15609909 |           | 0 | 0 | 0.2088   | 50.6   | 8.69E-06 | 2 | 1520.6626 | 0.903524 | 23.13865 | 1 |
| 15609909 |           | 0 | 0 | 0.000121 | 48.97  | 1.26E-05 | 2 | 812.40526 | 0.330748 | 17.86371 | 0 |
| 15609909 |           | 0 | 0 | 0.06057  | 40.25  | 9.42E-05 | 2 | 930.39452 | -0.74537 | 16.36009 | 0 |
| 15609909 | N-Term(A  | 0 | 0 | 0.03655  | 35.34  | 0.000614 | 2 | 1710.888  | -1.7355  | 39.87693 | 0 |
| 15609909 |           | 0 | 0 | 0.003457 | 28.36  | 0.003428 | 2 | 1824.983  | 0.792585 | 29.7628  | 1 |
| 15609980 |           | 0 | 0 | 0.2866   | 61.23  | 1.73E-06 | 2 | 844.48845 | -0.34385 | 20.52217 | 0 |
| 15609980 |           | 0 | 0 | 0.3972   | 42.96  | 5.05E-05 | 2 | 967.52074 | -0.01321 | 17.85111 | 0 |
| 15609980 |           | 0 | 0 | 0.4331   | 41.64  | 9.6E-05  | 3 | 1726.868  | -2.26201 | 21.59095 | 1 |
| 15610388 |           | 0 | 0 | 0.1608   | 54.49  | 6.05E-06 | 2 | 1394.7107 | 0.257873 | 41.42768 | 0 |
| 15610388 | M9(Oxidat | 0 | 0 | 0.06271  | 52.94  | 1.3E-05  | 2 | 1549.7825 | -0.45684 | 34.12379 | 0 |
| 15610388 |           | 0 | 0 | 0.3177   | 38.91  | 0.000128 | 2 | 1129.5477 | -0.70495 | 16.15706 | 0 |
| 15610388 | M10(Oxid. | 0 | 0 | 0.4402   | 32.89  | 0.001311 | 3 | 1705.8836 | -0.44975 | 31.93073 | 1 |
| 15609673 |           | 0 | 0 | 0.08298  | 82.37  | 5.78E-09 | 2 | 2672.2354 | -4.32677 | 27.37978 | 0 |
| 15609673 |           | 0 | 0 | 0.1767   | 81.54  | 9.47E-09 | 2 | 1151.5683 | -0.7871  | 27.29324 | 0 |
| 15609673 | M9(Oxidat | 0 | 0 | 0.05982  | 72.61  | 5.47E-08 | 2 | 2688.2374 | -1.68289 | 24.49219 | 0 |
| 15609673 |           | 0 | 0 | 0.2524   | 56.56  | 3.2E-06  | 2 | 1348.6596 | 0.350123 | 20.9298  | 0 |
| 15609673 |           | 0 | 0 | 0.4385   | 41.7   | 0.000108 | 2 | 914.49352 | -0.77033 | 19.0342  | 0 |
| 15609673 | M20(Oxid. | 0 | 0 | 0.3014   | 28.3   | 0.001476 | 4 | 3820.7975 | 1.120122 | 30.19538 | 1 |
| 15610830 |           | 0 | 0 | 2.59E-07 | 92.48  | 1.13E-09 | 2 | 1958.9816 | -0.13084 | 35.66553 | 0 |
| 15610830 | M8(Oxidat | 0 | 0 | 0.000818 | 77.13  | 1.93E-08 | 2 | 1168.5265 | 0.171632 | 14.50005 | 0 |

|          |           |   |   |          |        |          |   |           |          |          |   |
|----------|-----------|---|---|----------|--------|----------|---|-----------|----------|----------|---|
| 15610830 |           | 0 | 0 | 0.07667  | 75.95  | 2.53E-08 | 2 | 1152.5303 | -0.95465 | 19.63638 | 0 |
| 15610830 |           | 0 | 0 | 3.72E-05 | 65.06  | 3.12E-07 | 2 | 1180.6418 | -1.33831 | 18.07644 | 0 |
| 15610830 |           | 0 | 0 | 6.92E-05 | 54.78  | 9.31E-06 | 2 | 1471.7735 | 0.124882 | 43.81581 | 0 |
| 15610830 | N-Term(A  | 0 | 0 | 0.05709  | 52.93  | 1.04E-05 | 2 | 1222.6531 | -0.6482  | 21.51842 | 0 |
| 15610830 | M7(Oxidat | 0 | 0 | 0.02287  | 51.62  | 2.2E-05  | 2 | 1059.5618 | 0.216011 | 21.52116 | 0 |
| 15610830 |           | 0 | 0 | 0.03068  | 44.77  | 9.84E-05 | 2 | 1043.5666 | -0.0914  | 21.37662 | 0 |
| 15610830 |           | 0 | 0 | 0.000654 | 41.4   | 0.000163 | 3 | 1989.078  | 1.701666 | 42.52547 | 1 |
| 15610830 |           | 0 | 0 | 0.1598   | 26.17  | 0.005193 | 3 | 1878.9713 | 0.567507 | 30.25182 | 1 |
| 15609346 |           | 0 | 0 | 7.57E-10 | 65.4   | 4.33E-07 | 3 | 3177.5932 | 0.243435 | 36.41128 | 0 |
| 15609346 |           | 0 | 0 | 0.000157 | 55.82  | 2.61E-06 | 2 | 1013.5004 | -0.74842 | 16.25993 | 0 |
| 15609346 |           | 0 | 0 | 1.04E-07 | 53.11  | 7.09E-06 | 2 | 1108.5724 | -1.94485 | 17.83168 | 0 |
| 15609346 | C11(Carba | 0 | 0 | 0.004517 | 44.23  | 7.74E-05 | 3 | 1420.7578 | -0.91478 | 15.59308 | 0 |
| 15609346 |           | 0 | 0 | 9.56E-06 | 40.76  | 8.39E-05 | 2 | 799.3839  | -0.86767 | 17.17134 | 0 |
| 15609346 |           | 0 | 0 | 1.95E-08 | 33.03  | 0.000548 | 2 | 1526.8906 | -0.62268 | 18.62607 | 0 |
| 15609162 |           | 0 | 0 | 4.1E-05  | 118.62 | 2.75E-12 | 2 | 2170.087  | -0.86155 | 30.24664 | 0 |
| 15609162 |           | 0 | 0 | 0.002577 | 80.12  | 2.33E-08 | 4 | 2733.4389 | 1.266602 | 38.37948 | 0 |
| 15609162 |           | 0 | 0 | 0.01211  | 77.42  | 4.08E-08 | 4 | 2889.5387 | 0.759877 | 37.42964 | 1 |
| 15609162 | M9(Oxidat | 0 | 0 | 0.002551 | 76.41  | 5.94E-08 | 4 | 2749.4269 | -1.24234 | 34.01108 | 0 |
| 15609162 |           | 0 | 0 | 0.001244 | 70.66  | 1.93E-07 | 2 | 1697.8587 | -1.13739 | 20.13769 | 0 |
| 15609162 | M10(Oxid  | 0 | 0 | 0.008677 | 58.81  | 2.63E-06 | 4 | 2905.5285 | -1.02329 | 34.6241  | 1 |
| 15609162 | N-Term(A  | 0 | 0 | 0.002474 | 50.16  | 2.31E-05 | 3 | 2775.4457 | -0.11331 | 41.47843 | 0 |
| 15609162 |           | 0 | 0 | 0.01606  | 38.49  | 0.000354 | 3 | 3075.6408 | 1.258586 | 37.29497 | 1 |
| 15610142 | M11(Oxid  | 0 | 0 | 7.34E-12 | 81.04  | 7.85E-09 | 2 | 1691.7123 | -3.25021 | 18.26901 | 0 |
| 15610142 |           | 0 | 0 | 0.000095 | 56.15  | 2.42E-06 | 5 | 4657.2255 | -2.49508 | 38.97372 | 0 |

|          |           |   |   |         |       |          |   |           |          |          |   |
|----------|-----------|---|---|---------|-------|----------|---|-----------|----------|----------|---|
| 15610011 | C1(Carban | 0 | 0 | 0.385   | 74.75 | 3.34E-08 | 2 | 1848.8078 | -0.25878 | 21.28228 | 0 |
| 15610011 |           | 0 | 0 | 0.6105  | 60.43 | 1.13E-06 | 2 | 1568.8276 | -0.24162 | 48.68504 | 0 |
| 15610011 | C2(Carban | 0 | 0 | 0.5234  | 46.71 | 3.84E-05 | 2 | 1537.8154 | -0.16262 | 22.61809 | 0 |
| 15610584 | C20(Carba | 0 | 0 | 0.08701 | 79.62 | 2.84E-08 | 3 | 2386.2599 | 2.127408 | 47.14695 | 0 |



|          |           |   |   |          |        |          |   |           |          |          |   |
|----------|-----------|---|---|----------|--------|----------|---|-----------|----------|----------|---|
| 15610584 | C1(Carban | 0 | 0 | 0.07284  | 79.31  | 1.17E-08 | 3 | 2418.1186 | 2.012375 | 32.80796 | 0 |
| 15610584 |           | 0 | 0 | 0.07788  | 76.92  | 3.86E-08 | 2 | 1873.027  | -1.11379 | 22.30081 | 1 |
| 15610584 |           | 0 | 0 | 0.1461   | 76.77  | 2.1E-08  | 3 | 3548.9985 | -5.06144 | 47.78586 | 1 |
| 15610584 |           | 0 | 0 | 0.1519   | 72.15  | 6.08E-08 | 3 | 4175.3203 | 0.331548 | 49.38479 | 1 |
| 15610584 |           | 0 | 0 | 0.3823   | 69.98  | 1E-07    | 4 | 4331.4186 | -0.32818 | 46.97317 | 2 |
| 15610584 |           | 0 | 0 | 0.1942   | 55.98  | 2.52E-06 | 2 | 951.56182 | -0.44781 | 22.88041 | 0 |
| 15610584 | C29(Carba | 0 | 0 | 0.05611  | 53.63  | 7.59E-06 | 3 | 3168.6566 | -0.56995 | 34.68262 | 1 |
| 15610584 |           | 0 | 0 | 0.2967   | 38.88  | 0.000129 | 3 | 3392.9227 | 2.16666  | 47.20688 | 0 |
| 15610584 | N-Term(A  | 0 | 0 | 0.3337   | 35.95  | 0.000445 | 3 | 1915.0497 | 5.242929 | 24.36776 | 1 |
| 15610584 | C20(Carba | 0 | 0 | 0.2939   | 18.51  | 0.015502 | 4 | 3318.8051 | 1.75639  | 39.87702 | 1 |
| 57116765 |           | 0 | 0 | 0.2869   | 74.73  | 8.41E-08 | 2 | 1527.8194 | -0.8167  | 44.0511  | 0 |
| 57116765 |           | 0 | 0 | 0.2245   | 68.02  | 1.57E-07 | 2 | 2332.085  | 2.65738  | 24.85931 | 0 |
| 15610979 |           | 0 | 0 | 0.000834 | 91     | 1.51E-09 | 2 | 1791.902  | -0.27131 | 26.81149 | 0 |
| 15610979 | M2(Oxidat | 0 | 0 | 0.000346 | 80.99  | 1.63E-08 | 3 | 1571.7925 | 0.247056 | 33.37931 | 0 |
| 15610979 | M2(Oxidat | 0 | 0 | 0.004087 | 69.88  | 2E-07    | 2 | 1587.7834 | -2.31046 | 28.364   | 0 |
| 15610979 |           | 0 | 0 | 0.001601 | 65.14  | 7.35E-07 | 3 | 1555.7962 | -0.62575 | 36.49061 | 0 |
| 15610979 | N-Term(A  | 0 | 0 | 0.01277  | 63.74  | 8.24E-07 | 2 | 1613.8039 | 0.736959 | 38.53626 | 0 |
| 15610979 |           | 0 | 0 | 0.01969  | 50.32  | 1.16E-05 | 2 | 1387.797  | 0.89593  | 26.27325 | 0 |
| 15610979 | N-Term(A  | 0 | 0 | 0.01149  | 49.36  | 2.32E-05 | 2 | 1597.8078 | 0.006607 | 43.63819 | 0 |
| 15610979 | C1(Carban | 0 | 0 | 0.07869  | 47.31  | 4.27E-05 | 3 | 1887.9239 | 0.012189 | 31.30162 | 1 |
| 15610979 |           | 0 | 0 | 0.04679  | 43.76  | 6.73E-05 | 3 | 1496.781  | -0.44918 | 22.97597 | 0 |
| 15610979 | C1(Carban | 0 | 0 | 0.03733  | 41.09  | 0.00014  | 3 | 1903.9191 | 0.15034  | 26.79456 | 1 |
| 15610979 |           | 0 | 0 | 0.04214  | 36.88  | 0.000246 | 2 | 1137.6524 | -0.36035 | 24.07144 | 1 |
| 15610979 |           | 0 | 0 | 0.1917   | 31.8   | 0.001454 | 3 | 1652.8817 | -0.65602 | 17.65985 | 1 |
| 15610979 | C1(Carban | 0 | 0 | 0.06007  | 25.74  | 0.004267 | 3 | 1871.9269 | -1.10649 | 34.00824 | 1 |
| 15610979 | M2(Oxidat | 0 | 0 | 0.217    | 19.06  | 0.023591 | 3 | 1929.9671 | -0.17881 | 32.59762 | 1 |
| 15610979 | M10(Oxid  | 0 | 0 | 0.1003   | 14.95  | 0.067177 | 3 | 1913.9731 | 0.256176 | 35.46109 | 1 |
| 15609424 | M5(Oxidat | 0 | 0 | 3.35E-12 | 136.06 | 3.22E-14 | 2 | 1907.8997 | -1.00136 | 25.61603 | 0 |
| 15609424 |           | 0 | 0 | 5.49E-16 | 133.56 | 5.51E-14 | 2 | 1891.9051 | -0.85861 | 47.45646 | 0 |
| 15609424 | M1(Oxidat | 0 | 0 | 4.58E-07 | 102.35 | 1.08E-10 | 2 | 1709.8285 | 0.527836 | 23.53023 | 0 |
| 15609424 |           | 0 | 0 | 1.85E-15 | 85.24  | 5.24E-09 | 2 | 1693.8249 | -4.63129 | 25.14213 | 0 |
| 15609424 |           | 0 | 0 | 2.54E-14 | 76.07  | 7.54E-08 | 2 | 1312.7217 | -0.20874 | 45.42843 | 0 |
| 15609424 |           | 0 | 0 | 0.002636 | 75.59  | 5.8E-08  | 2 | 2489.2283 | -0.75213 | 30.89489 | 1 |
| 15609424 | N-Term(A  | 0 | 0 | 0.001563 | 68.6   | 1.73E-07 | 2 | 1751.835  | -1.82253 | 26.9547  | 0 |
| 15609424 |           | 0 | 0 | 3.84E-11 | 58.75  | 1.33E-06 | 2 | 1205.7217 | -0.72489 | 19.89778 | 1 |
| 15609424 |           | 0 | 0 | 3.22E-12 | 57.12  | 2.52E-06 | 3 | 2364.2653 | -0.22348 | 40.84301 | 0 |

|          |           |   |       |          |        |          |   |           |          |          |   |
|----------|-----------|---|-------|----------|--------|----------|---|-----------|----------|----------|---|
| 15609424 | M4(Oxidat | 0 | 0     | 5.01E-10 | 53.7   | 6.19E-06 | 3 | 2123.0442 | -0.48691 | 25.21279 | 1 |
| 15609424 |           | 0 | 0     | 1.64E-08 | 53.07  | 4.92E-06 | 2 | 950.5526  | -0.48649 | 18.26747 | 0 |
| 15609424 | M5(Oxidat | 0 | 0     | 0.01823  | 52.65  | 1.17E-05 | 3 | 2505.2272 | 0.838528 | 28.65916 | 1 |
| 15609424 |           | 0 | 0     | 0.0561   | 49.87  | 2.42E-05 | 3 | 2645.3313 | -0.01488 | 28.77909 | 2 |
| 15609424 |           | 0 | 0     | 1.96E-06 | 34.86  | 0.000327 | 3 | 2082.1671 | 0.229141 | 34.47911 | 1 |
| 15609424 |           | 0 | 0     | 0.003408 | 31.5   | 0.001345 | 2 | 788.46208 | -0.54228 | 18.78255 | 0 |
| 15609424 | N-Term(A  | 0 | 0.004 | 0.1494   | 49.61  | 1.09E-05 | 2 | 992.56304 | -0.59484 | 27.53417 | 0 |
| 15611006 |           | 0 | 0     | 5.82E-16 | 93.66  | 7.32E-10 | 3 | 3245.6209 | -0.53503 | 45.42897 | 0 |
| 15611006 |           | 0 | 0     | 5.82E-16 | 79.75  | 1.8E-08  | 2 | 1140.6008 | -0.06636 | 46.07935 | 0 |
| 15611006 |           | 0 | 0     | 5.82E-16 | 77.58  | 2.71E-08 | 4 | 3502.7721 | 0.181037 | 37.56817 | 1 |
| 15611006 |           | 0 | 0     | 3.41E-14 | 54.31  | 4.63E-06 | 2 | 1753.8414 | 0.453229 | 24.6352  | 0 |
| 15611006 |           | 0 | 0     | 2.07E-10 | 54.16  | 3.84E-06 | 2 | 913.47319 | -0.68877 | 18.06559 | 0 |
| 15611006 | C8(Carban | 0 | 0     | 7.53E-12 | 39.17  | 0.000206 | 4 | 1800.9881 | -1.19239 | 29.2729  | 1 |
| 15611006 |           | 0 | 0     | 4.74E-08 | 29.51  | 0.002351 | 4 | 2875.4176 | -2.06163 | 29.65271 | 1 |
| 15611023 | M20(Oxid: | 0 | 0     | 0.2717   | 82.28  | 9.17E-09 | 3 | 2288.0735 | -0.76783 | 30.80576 | 0 |
| 15611023 |           | 0 | 0     | 0.3583   | 80.82  | 1.03E-08 | 3 | 2272.0812 | 0.400342 | 34.73747 | 0 |
| 15611023 |           | 0 | 0     | 0.2336   | 66     | 4.52E-07 | 2 | 1788.9264 | -0.86762 | 28.05869 | 1 |
| 15611023 |           | 0 | 0     | 0.3355   | 59.2   | 3.01E-06 | 3 | 1926.0218 | 1.978881 | 36.21578 | 0 |
| 15611023 | C1(Carban | 0 | 0     | 0.6567   | 46.17  | 2.41E-05 | 2 | 1142.4963 | -0.58283 | 21.63714 | 0 |
| 15611023 |           | 0 | 0     | 0.5279   | 34.37  | 0.000676 | 2 | 1660.8334 | 0.241037 | 29.59514 | 0 |
| 15610302 |           | 0 | 0     | 4.59E-16 | 130.78 | 2.01E-13 | 2 | 1754.9552 | 0.203136 | 38.37714 | 0 |
| 15610302 |           | 0 | 0     | 4.59E-16 | 107.38 | 4.75E-11 | 2 | 1359.6938 | 0.001386 | 46.34876 | 0 |
| 15610302 | M9(Oxidat | 0 | 0     | 5.01E-13 | 84.54  | 6.68E-09 | 2 | 1375.6897 | 0.769479 | 35.34305 | 0 |
| 15610302 | C6(Carban | 0 | 0     | 2.84E-15 | 84.03  | 4.15E-09 | 2 | 1441.6818 | 0.235832 | 44.3478  | 0 |
| 15610302 | M9(Oxidat | 0 | 0     | 4.05E-11 | 75.26  | 6.7E-08  | 2 | 1531.7889 | -0.61388 | 47.86223 | 1 |
| 15610302 | C6(Carban | 0 | 0     | 1.35E-13 | 75.18  | 4.25E-08 | 2 | 1425.6864 | -0.07458 | 45.05338 | 0 |
| 15610302 |           | 0 | 0     | 3.99E-15 | 74.52  | 9.71E-08 | 3 | 1515.7944 | -0.33983 | 29.45451 | 1 |
| 15610302 |           | 0 | 0     | 3.09E-15 | 71.43  | 1.12E-07 | 3 | 2378.1996 | 0.352289 | 47.27254 | 0 |
| 15610302 | M9(Oxidat | 0 | 0     | 4.92E-11 | 67.31  | 4.64E-07 | 2 | 1913.9903 | 2.08239  | 23.63973 | 2 |
| 15610302 |           | 0 | 0     | 6.63E-10 | 56.95  | 3.33E-06 | 3 | 1455.7553 | 0.118066 | 21.65848 | 1 |
| 15610302 |           | 0 | 0     | 4.87E-10 | 51.88  | 1.46E-05 | 4 | 1897.9914 | -0.01453 | 27.99529 | 2 |
| 15610302 |           | 0 | 0     | 2.33E-07 | 49.61  | 1.09E-05 | 2 | 1382.6283 | 0.934595 | 23.9521  | 0 |
| 15610302 |           | 0 | 0     | 6.12E-07 | 46.56  | 2.2E-05  | 2 | 927.48998 | 0.545017 | 15.43128 | 0 |
| 15610302 |           | 0 | 0     | 1.79E-06 | 46.38  | 2.65E-05 | 3 | 1968.917  | 0.078218 | 20.2068  | 1 |
| 15610302 | M6(Oxidat | 0 | 0     | 2.09E-07 | 43.99  | 3.98E-05 | 2 | 1398.6221 | 0.1084   | 15.10339 | 0 |
| 15610302 | N-Term(A  | 0 | 0     | 7.51E-08 | 43.69  | 7.91E-05 | 3 | 2420.2097 | 0.141977 | 33.74866 | 0 |

|          |           |   |       |          |        |          |   |           |          |          |   |
|----------|-----------|---|-------|----------|--------|----------|---|-----------|----------|----------|---|
| 15610302 | C6(Carban | 0 | 0     | 3.75E-07 | 41.01  | 0.000115 | 3 | 3784.8556 | -3.1524  | 39.18079 | 1 |
| 15610302 | M6(Oxidat | 0 | 0     | 9.22E-06 | 40.89  | 8.13E-05 | 3 | 1984.9109 | -0.43554 | 18.33968 | 1 |
| 15610302 |           | 0 | 0     | 1.61E-08 | 37.99  | 0.000469 | 4 | 2159.1239 | 0.028147 | 36.2116  | 2 |
| 15610302 | N-Term(A  | 0 | 0     | 0.00128  | 32.03  | 0.000658 | 2 | 1467.6985 | 0.963159 | 42.95147 | 0 |
| 15610302 |           | 0 | 0     | 0.004685 | 29.02  | 0.002318 | 2 | 2099.0835 | -0.25612 | 20.4332  | 2 |
| 15610302 | N-Term(A  | 0 | 0     | 0.01458  | 26.73  | 0.003291 | 2 | 1497.7654 | -0.16547 | 20.92226 | 1 |
| 15610302 | M6(Oxidat | 0 | 0     | 0.09697  | 21.49  | 0.007079 | 3 | 2000.9053 | -0.66655 | 16.28562 | 1 |
| 15610302 |           | 0 | 0.002 | 0.1963   | 23.44  | 0.009737 | 2 | 1570.8185 | 0.055859 | 19.17891 | 1 |
| 15610302 | C6(Carban | 0 | 0.004 | 0.2644   | 21.19  | 0.008744 | 4 | 3800.8524 | -2.62378 | 36.3913  | 1 |
| 15609134 |           | 0 | 0     | 0.03779  | 114.58 | 6.1E-12  | 3 | 3164.6294 | -1.34096 | 37.35385 | 0 |
| 15609134 |           | 0 | 0     | 0.08844  | 67.77  | 2.67E-07 | 3 | 3660.8412 | -1.47279 | 28.08707 | 2 |
| 15609134 |           | 0 | 0     | 0.06681  | 52.65  | 1.06E-05 | 3 | 2055.0333 | -1.00874 | 25.27643 | 0 |
| 15609134 |           | 0 | 0     | 0.1993   | 39.43  | 0.000257 | 3 | 1264.6943 | -0.00137 | 15.9043  | 1 |
| 15609134 |           | 0 | 0     | 0.1547   | 23.2   | 0.007658 | 4 | 3504.7462 | 0.229753 | 29.09296 | 1 |
| 15610079 |           | 0 | 0     | 0.01277  | 92.26  | 8.91E-10 | 2 | 1575.7609 | -0.05042 | 25.12815 | 0 |
| 15610079 |           | 0 | 0     | 0.01866  | 84.17  | 6.89E-09 | 2 | 2549.2417 | -0.11944 | 39.29253 | 0 |
| 15610079 |           | 0 | 0     | 0.02385  | 78.53  | 3.37E-08 | 2 | 1034.5451 | -0.12542 | 33.68932 | 0 |
| 15610079 |           | 0 | 0     | 0.01199  | 75.57  | 5.27E-08 | 3 | 2992.4527 | -0.73164 | 37.62249 | 1 |
| 15610079 | M5(Oxidat | 0 | 0     | 0.09326  | 69.03  | 2.94E-07 | 2 | 1050.5389 | -1.20923 | 26.00053 | 0 |
| 15610079 | M5(Oxidat | 0 | 0     | 0.009734 | 62.04  | 1.25E-06 | 3 | 2607.284  | 0.262112 | 31.2696  | 1 |
| 15610079 |           | 0 | 0     | 0.009499 | 51.69  | 1.08E-05 | 5 | 4110.0514 | 1.400849 | 43.30474 | 0 |
| 15610079 |           | 0 | 0     | 0.1738   | 50.21  | 9.51E-06 | 2 | 996.54711 | -0.21634 | 22.93133 | 0 |
| 15610079 | N-Term(A  | 0 | 0     | 0.2245   | 45.51  | 6.89E-05 | 2 | 1092.556  | 4.809366 | 26.44424 | 0 |
| 15610079 |           | 0 | 0     | 0.0855   | 43.47  | 8.77E-05 | 2 | 2591.2874 | -0.3744  | 33.7946  | 1 |
| 15610079 | N-Term(A  | 0 | 0     | 0.1511   | 43.44  | 6.34E-05 | 3 | 2591.2538 | 0.46388  | 40.55036 | 0 |
| 15610079 |           | 0 | 0     | 0.08548  | 33.01  | 0.001275 | 3 | 2031.0468 | 0.106751 | 28.80106 | 1 |
| 15610079 |           | 0 | 0     | 0.2638   | 31.11  | 0.000773 | 2 | 1451.8385 | 3.848414 | 24.08354 | 1 |
| 15610879 |           | 0 | 0     | 1.1E-15  | 84.44  | 5.04E-09 | 2 | 1515.7374 | -1.66191 | 29.56546 | 0 |
| 15610879 |           | 0 | 0     | 2.22E-08 | 77.07  | 3.73E-08 | 2 | 1288.711  | 0.173661 | 22.59835 | 0 |
| 15610879 | M3(Oxidat | 0 | 0     | 1.45E-05 | 70.02  | 2.34E-07 | 2 | 1160.6088 | -0.41707 | 22.02155 | 0 |
| 15610879 |           | 0 | 0     | 1.4E-06  | 60.21  | 2.1E-06  | 2 | 1144.6137 | -0.59954 | 27.55621 | 0 |
| 15610879 |           | 0 | 0     | 0.04119  | 50.22  | 9.48E-06 | 2 | 878.49834 | 0.122157 | 24.27544 | 0 |
| 15610879 |           | 0 | 0     | 3.61E-05 | 48.04  | 1.88E-05 | 3 | 1323.7741 | -0.2567  | 28.42108 | 0 |
| 15610879 | M3(Oxidat | 0 | 0     | 1.29E-06 | 46.25  | 5.45E-05 | 3 | 2657.3298 | -0.5717  | 27.60408 | 1 |
| 15610879 |           | 0 | 0     | 7.7E-10  | 45.69  | 7.01E-05 | 3 | 2740.3846 | -1.54892 | 31.64378 | 0 |
| 15610879 |           | 0 | 0     | 0.000667 | 37.96  | 0.00032  | 2 | 986.57292 | -1.30525 | 14.79117 | 1 |

|          |           |   |   |          |        |          |   |           |          |          |   |
|----------|-----------|---|---|----------|--------|----------|---|-----------|----------|----------|---|
| 15610879 |           | 0 | 0 | 0.004988 | 29.24  | 0.001727 | 3 | 1390.767  | -1.37971 | 26.12857 | 1 |
| 15610879 |           | 0 | 0 | 0.01116  | 22.54  | 0.008636 | 3 | 1515.8482 | -0.52254 | 21.41374 | 1 |
| 15609129 |           | 0 | 0 | 9.8E-06  | 80.41  | 9.08E-09 | 2 | 1495.8848 | 0.322166 | 36.16327 | 0 |
| 15609129 |           | 0 | 0 | 8.53E-05 | 64.65  | 4.11E-07 | 2 | 1292.7325 | 0.230654 | 42.45534 | 0 |
| 15609129 |           | 0 | 0 | 0.03894  | 64.05  | 1.06E-06 | 2 | 858.50505 | 0.770155 | 24.36599 | 0 |
| 15609129 |           | 0 | 0 | 4.84E-05 | 59.07  | 1.3E-06  | 2 | 1420.8268 | -0.21922 | 19.6648  | 1 |
| 15609129 |           | 0 | 0 | 6.07E-05 | 54.34  | 3.67E-06 | 2 | 1822.0926 | 0.870206 | 39.40124 | 1 |
| 15609129 | N-Term(A  | 0 | 0 | 0.000487 | 49.19  | 1.69E-05 | 2 | 1334.7437 | 0.721968 | 32.72831 | 0 |
| 15609129 |           | 0 | 0 | 0.004411 | 48.77  | 2.59E-05 | 3 | 2696.3617 | 2.060611 | 30.61564 | 0 |
| 15609129 | N-Term(A  | 0 | 0 | 0.000155 | 41.78  | 6.62E-05 | 2 | 1537.8943 | -0.36517 | 43.81342 | 0 |
| 15609129 |           | 0 | 0 | 0.04399  | 23.78  | 0.008166 | 3 | 1142.6633 | -0.67175 | 21.11645 | 1 |
| 15610900 |           | 0 | 0 | 5.17E-16 | 109.71 | 2.51E-11 | 2 | 1771.9075 | -0.62814 | 34.54695 | 0 |
| 15610900 |           | 0 | 0 | 5.17E-16 | 97.07  | 5.1E-10  | 2 | 1270.7006 | 0.313073 | 40.81439 | 0 |
| 15610900 |           | 0 | 0 | 3.17E-09 | 85.48  | 3.4E-09  | 4 | 3123.5465 | 1.54254  | 46.77856 | 0 |
| 15610900 |           | 0 | 0 | 5.17E-16 | 84.21  | 1.06E-08 | 3 | 1928.0092 | -0.29143 | 24.65831 | 1 |
| 15610900 | M11(Oxid  | 0 | 0 | 5.17E-16 | 84.02  | 5.15E-09 | 4 | 3139.5397 | 0.976977 | 41.70951 | 0 |
| 15610900 | N-Term(A  | 0 | 0 | 5.82E-10 | 64.74  | 8.23E-07 | 2 | 1312.711  | 0.159059 | 39.49514 | 0 |
| 15610900 |           | 0 | 0 | 5.17E-16 | 63.5   | 7.82E-07 | 3 | 1754.9775 | 0.814737 | 32.6355  | 1 |
| 15610900 | M11(Oxid  | 0 | 0 | 6.34E-09 | 61.04  | 8.66E-07 | 3 | 3896.9403 | -1.18954 | 40.74921 | 1 |
| 15610900 |           | 0 | 0 | 3.71E-06 | 44.61  | 3.45E-05 | 2 | 1069.5168 | -0.57042 | 13.09664 | 0 |
| 15610900 |           | 0 | 0 | 1.8E-08  | 42.69  | 7E-05    | 2 | 1032.5945 | -0.38861 | 19.323   | 1 |
| 15610900 |           | 0 | 0 | 1.75E-06 | 39.46  | 0.000266 | 2 | 776.42589 | -0.31093 | 13.53001 | 0 |
| 15610900 |           | 0 | 0 | 0.000484 | 39.13  | 0.000299 | 3 | 1389.7439 | -0.43221 | 17.38546 | 1 |
| 15610900 |           | 0 | 0 | 0.000385 | 38.96  | 0.000165 | 4 | 3880.9628 | 3.295049 | 45.15834 | 1 |
| 15610900 |           | 0 | 0 | 0.000381 | 34.68  | 0.000579 | 2 | 1620.7983 | -0.46022 | 16.03942 | 1 |
| 15610900 |           | 0 | 0 | 0.04747  | 34.03  | 0.000988 | 2 | 1116.6111 | -0.82367 | 18.09402 | 1 |
| 15610900 | M4(Oxidat | 0 | 0 | 0.000273 | 27.68  | 0.002133 | 2 | 982.49034 | -1.11278 | 21.6262  | 0 |
| 15610900 | N-Term(A  | 0 | 0 | 0.01341  | 19.08  | 0.014831 | 3 | 3181.5611 | 4.381196 | 41.99681 | 0 |
| 15610959 |           | 0 | 0 | 2.06E-09 | 98.51  | 2.54E-10 | 2 | 1585.8779 | -1.13255 | 33.90888 | 0 |
| 15610959 |           | 0 | 0 | 0.000623 | 69.86  | 1.19E-07 | 3 | 1772.0072 | 0.335194 | 35.65822 | 0 |
| 15610959 |           | 0 | 0 | 5.76E-15 | 66.38  | 5.18E-07 | 2 | 2103.0899 | -0.24723 | 37.49992 | 1 |
| 15610959 |           | 0 | 0 | 4.65E-14 | 62.05  | 1.43E-06 | 2 | 1730.9155 | 0.457314 | 39.44442 | 0 |
| 15610959 | M4(Oxidat | 0 | 0 | 1.1E-05  | 59.76  | 2.32E-06 | 2 | 1746.9106 | 0.568867 | 36.83979 | 0 |
| 15610959 |           | 0 | 0 | 0.000688 | 59.18  | 1.45E-06 | 2 | 1193.6513 | -1.02089 | 28.35012 | 1 |
| 15610959 |           | 0 | 0 | 8.49E-05 | 44.74  | 6.55E-05 | 3 | 1349.7524 | -0.90148 | 30.2646  | 2 |
| 15610959 | M2(Oxidat | 0 | 0 | 0.009451 | 41.9   | 6.44E-05 | 2 | 840.40361 | 0.375715 | 15.13336 | 0 |

|          |           |   |   |          |        |          |   |           |          |          |   |
|----------|-----------|---|---|----------|--------|----------|---|-----------|----------|----------|---|
| 15610959 |           | 0 | 0 | 0.01722  | 41.21  | 0.000121 | 3 | 3403.779  | -0.80071 | 36.30675 | 0 |
| 15610959 | M7(Oxidat | 0 | 0 | 0.001806 | 35.93  | 0.000472 | 3 | 2119.084  | -0.64594 | 35.26683 | 1 |
| 15610959 |           | 0 | 0 | 0.000886 | 35.33  | 0.000292 | 2 | 824.40843 | 0.063717 | 19.13796 | 0 |
| 15610571 |           | 0 | 0 | 0.000133 | 113.28 | 8.69E-12 | 2 | 2197.1011 | -1.1968  | 38.15102 | 0 |
| 15610571 |           | 0 | 0 | 0.01839  | 72.9   | 1.1E-07  | 3 | 3100.5868 | 0.501134 | 47.16103 | 1 |
| 15610571 |           | 0 | 0 | 0.02539  | 70.4   | 1.23E-07 | 3 | 3300.6174 | 1.81586  | 43.12237 | 0 |
| 15610571 |           | 0 | 0 | 0.02854  | 67.02  | 3.18E-07 | 2 | 1133.6318 | 0.344173 | 48.91167 | 0 |
| 15610571 |           | 0 | 0 | 0.06545  | 62.75  | 5.3E-07  | 2 | 922.49883 | -0.51426 | 27.00033 | 0 |
| 15610571 | N-Term(A  | 0 | 0 | 0.1634   | 43.21  | 9.79E-05 | 2 | 1175.6418 | -0.14041 | 31.75353 | 0 |
| 15610571 |           | 0 | 0 | 0.2101   | 38.34  | 0.000249 | 2 | 1711.887  | -0.30423 | 21.71603 | 1 |
| 15610571 |           | 0 | 0 | 0.2301   | 37.82  | 0.000487 | 3 | 1923.0159 | -1.92302 | 25.51557 | 1 |
| 15610571 | N-Term(A  | 0 | 0 | 0.3957   | 31.91  | 0.000805 | 2 | 964.50762 | -2.33315 | 25.41962 | 0 |
| 15609356 |           | 0 | 0 | 0.005398 | 113.07 | 1.16E-11 | 2 | 1771.9086 | -0.03068 | 30.40192 | 1 |
| 15609356 |           | 0 | 0 | 0.00987  | 98.68  | 2.57E-10 | 2 | 1577.8385 | -0.61015 | 22.22124 | 0 |
| 15609356 |           | 0 | 0 | 2.78E-05 | 92.1   | 1.02E-09 | 2 | 1643.8147 | 0.634843 | 32.50073 | 0 |
| 15609356 |           | 0 | 0 | 8.52E-05 | 83.16  | 1.01E-08 | 3 | 1684.9493 | -0.06372 | 30.97549 | 0 |
| 15609356 | N-Term(A  | 0 | 0 | 0.000516 | 68.88  | 3.43E-07 | 2 | 1619.8521 | 1.248311 | 26.70443 | 0 |
| 15609356 |           | 0 | 0 | 0.004573 | 66.27  | 2.35E-07 | 2 | 855.53002 | 0.168972 | 22.03969 | 0 |
| 57117150 |           | 0 | 0 | 0.01111  | 110.87 | 1.72E-11 | 2 | 1940.0452 | 0.19191  | 31.23806 | 0 |
| 57117150 |           | 0 | 0 | 0.1159   | 77.41  | 4.08E-08 | 2 | 1105.6009 | 0.693177 | 28.60871 | 0 |
| 57117150 |           | 0 | 0 | 0.01503  | 61.84  | 1.15E-06 | 3 | 3006.5936 | -1.08437 | 27.56721 | 1 |
| 57117150 |           | 0 | 0 | 0.466    | 43.06  | 9.89E-05 | 2 | 1085.5687 | -1.11479 | 13.39184 | 0 |
| 57117150 |           | 0 | 0 | 0.01885  | 36.88  | 0.000318 | 4 | 3026.6271 | -0.00509 | 32.947   | 1 |
| 57117150 |           | 0 | 0 | 0.4458   | 25.54  | 0.002786 | 3 | 1772.0182 | 0.180751 | 26.19673 | 0 |
| 15609762 |           | 0 | 0 | 0.008236 | 97.72  | 2.7E-10  | 2 | 2184.1963 | -0.94068 | 30.10696 | 1 |
| 15609762 |           | 0 | 0 | 0.02921  | 97.61  | 2.08E-10 | 2 | 1219.6819 | 2.075184 | 33.68053 | 0 |
| 15609762 |           | 0 | 0 | 0.000102 | 95.1   | 4.64E-10 | 2 | 1941.0656 | 0.184464 | 48.80788 | 0 |
| 15609762 |           | 0 | 0 | 0.01074  | 95.1   | 5.25E-10 | 3 | 2667.303  | 1.680112 | 36.61731 | 0 |
| 15609762 | M5(Oxidat | 0 | 0 | 0.01073  | 95.09  | 3.72E-10 | 3 | 2683.287  | -2.39439 | 44.38933 | 0 |
| 15609762 |           | 0 | 0 | 0.01291  | 87.12  | 4.17E-09 | 2 | 1101.6263 | -0.03903 | 35.69721 | 0 |
| 15609762 |           | 0 | 0 | 0.09436  | 81.61  | 1.76E-08 | 2 | 2098.1055 | 0.68874  | 48.27692 | 1 |
| 15609762 |           | 0 | 0 | 0.0452   | 48.91  | 1.54E-05 | 3 | 3169.7259 | 1.332596 | 37.9067  | 0 |
| 15609762 | N-Term(A  | 0 | 0 | 0.001776 | 48.34  | 2.05E-05 | 3 | 3211.727  | -1.63227 | 39.00375 | 0 |
| 15609762 | N-Term(A  | 0 | 0 | 0.01759  | 47.07  | 3.14E-05 | 3 | 2709.3094 | 0.119979 | 37.11931 | 0 |
| 15609762 |           | 0 | 0 | 0.09606  | 46.5   | 2.23E-05 | 2 | 1015.4947 | -0.91068 | 14.97556 | 0 |
| 15609762 |           | 0 | 0 | 0.1108   | 36.9   | 0.000204 | 3 | 3325.8197 | -0.94594 | 34.10666 | 1 |

|          |           |   |       |          |       |          |   |           |          |          |   |
|----------|-----------|---|-------|----------|-------|----------|---|-----------|----------|----------|---|
| 15609762 |           | 0 | 0     | 0.1441   | 36.59 | 0.000439 | 3 | 1732.8752 | -0.83392 | 21.03861 | 1 |
| 15609762 |           | 0 | 0     | 0.2775   | 33.52 | 0.000444 | 2 | 778.44579 | -0.00508 | 41.99107 | 0 |
| 15609762 |           | 0 | 0     | 0.07796  | 32.66 | 0.000976 | 2 | 1041.5791 | -0.83732 | 15.57067 | 1 |
| 15609762 |           | 0 | 0     | 0.03384  | 25.28 | 0.002958 | 4 | 3951.1364 | -1.22953 | 33.91577 | 2 |
| 15609762 |           | 0 | 0     | 0.1619   | 21.38 | 0.015283 | 5 | 2815.4841 | -0.33145 | 30.54496 | 2 |
| 15609762 |           | 0 | 0     | 0.2593   | 19.93 | 0.016768 | 3 | 1197.6801 | -0.85408 | 16.13294 | 2 |
| 15609762 | N-Term(A  | 0 | 0     | 0.1228   | 19.03 | 0.02563  | 2 | 2140.1106 | -1.86579 | 30.78219 | 1 |
| 15609762 | M5(Oxidat | 0 | 0     | 0.05649  | 16.92 | 0.030485 | 4 | 3400.6786 | 1.224248 | 45.90045 | 1 |
| 15610873 |           | 0 | 0     | 6.54E-15 | 89.62 | 1.47E-09 | 2 | 1171.57   | -0.21118 | 19.43807 | 0 |
| 15610873 | N-Term(A  | 0 | 0     | 1.93E-11 | 69.43 | 1.31E-07 | 2 | 1213.581  | 0.143308 | 19.49857 | 0 |
| 15610873 |           | 0 | 0     | 1.25E-12 | 62.85 | 9.86E-07 | 2 | 1414.7033 | -0.0683  | 18.2327  | 1 |
| 15610873 |           | 0 | 0     | 9.95E-07 | 62.05 | 1.06E-06 | 2 | 1212.707  | 0.820873 | 43.91353 | 1 |
| 15610873 |           | 0 | 0     | 6.37E-09 | 50.28 | 1.13E-05 | 2 | 980.56194 | -1.74803 | 18.60782 | 1 |
| 15610873 |           | 0 | 0     | 0.000164 | 46.48 | 2.24E-05 | 2 | 957.60832 | -0.90573 | 25.64158 | 1 |
| 15610873 |           | 0 | 0     | 1.63E-09 | 41.12 | 7.71E-05 | 2 | 824.46221 | -0.3948  | 24.43098 | 0 |
| 15610873 |           | 0 | 0     | 0.002573 | 36.36 | 0.000474 | 4 | 1570.8028 | -1.11804 | 15.60222 | 2 |
| 15610873 |           | 0 | 0     | 0.003263 | 36.18 | 0.000289 | 2 | 829.51366 | -0.67854 | 28.2716  | 0 |
| 15610873 |           | 0 | 0     | 3.81E-07 | 29.99 | 0.001904 | 3 | 1425.6974 | 0.365118 | 23.51266 | 1 |
| 15610873 |           | 0 | 0     | 1.28E-06 | 18.58 | 0.017334 | 3 | 1193.6867 | 0.367232 | 19.87589 | 2 |
| 15610873 | N-Term(A  | 0 | 0.003 | 0.05201  | 29.45 | 0.00193  | 2 | 1254.7182 | 1.323761 | 39.06954 | 1 |
| 15610873 |           | 0 | 0.003 | 0.06425  | 12.12 | 0.119684 | 4 | 1922.0093 | 0.10757  | 30.21887 | 2 |
| 15610930 |           | 0 | 0     | 4.9E-06  | 95.83 | 8.23E-10 | 2 | 859.46343 | 0.192219 | 17.19044 | 0 |
| 15610930 |           | 0 | 0     | 8.62E-11 | 87.26 | 3.95E-09 | 3 | 2060.0899 | 0.726977 | 40.48858 | 1 |
| 15610930 |           | 0 | 0     | 5.03E-07 | 86.68 | 4.51E-09 | 2 | 1219.6436 | 0.476357 | 49.65616 | 0 |
| 15610930 |           | 0 | 0     | 1.06E-06 | 65.74 | 2.66E-07 | 2 | 955.53148 | -0.55529 | 16.3913  | 0 |
| 15610930 | N-Term(A  | 0 | 0     | 5.81E-05 | 54.76 | 7.19E-06 | 2 | 901.47331 | -0.56807 | 18.82328 | 0 |
| 15610930 | N-Term(A  | 0 | 0     | 0.02366  | 26.62 | 0.005989 | 2 | 1261.6574 | 3.019783 | 30.88089 | 0 |
| 15609880 | M23(Oxid. | 0 | 0     | 1.83E-05 | 92.57 | 7.19E-10 | 3 | 2524.2039 | 0.778572 | 40.89861 | 0 |
| 15609880 | M9(Oxidat | 0 | 0     | 0.001956 | 82.69 | 8.34E-09 | 2 | 1271.644  | -1.08348 | 42.28862 | 0 |
| 15609880 |           | 0 | 0     | 0.00012  | 82.19 | 7.85E-09 | 2 | 2038.0965 | -0.17573 | 40.01718 | 0 |
| 15609880 |           | 0 | 0     | 0.00013  | 76.78 | 3.04E-08 | 3 | 2508.2098 | 1.116607 | 49.71311 | 0 |
| 15609880 |           | 0 | 0     | 0.003529 | 72.29 | 6.79E-08 | 2 | 1255.6506 | 0.102731 | 46.24121 | 0 |
| 15609880 |           | 0 | 0     | 0.006683 | 70.55 | 1.81E-07 | 2 | 1280.6231 | 0.064948 | 20.88714 | 1 |
| 15609880 | M13(Oxid. | 0 | 0     | 0.000375 | 69.09 | 1.36E-07 | 3 | 2540.1998 | 1.165624 | 31.83883 | 0 |
| 15609880 | M3(Oxidat | 0 | 0     | 0.00191  | 68.07 | 1.56E-07 | 3 | 3609.7145 | -1.41165 | 38.82726 | 1 |
| 15609880 | C4(Carban | 0 | 0     | 0.01022  | 62.83 | 5.2E-07  | 2 | 949.45128 | -0.79498 | 12.04974 | 0 |

|          |           |   |       |          |       |          |   |           |          |          |   |
|----------|-----------|---|-------|----------|-------|----------|---|-----------|----------|----------|---|
| 15609880 | M3(Oxidat | 0 | 0     | 0.005706 | 60.77 | 1.05E-06 | 3 | 3593.7195 | -1.44022 | 47.71433 | 1 |
| 15609880 | M33(Oxid: | 0 | 0     | 0.001319 | 60.48 | 1.07E-06 | 3 | 3577.7248 | -1.3667  | 49.2673  | 1 |
| 15609880 | C4(Carban | 0 | 0     | 0.0031   | 50.28 | 2.3E-05  | 3 | 2968.5315 | 0.145512 | 37.8923  | 1 |
| 15609880 |           | 0 | 0     | 0.003958 | 48.47 | 3.34E-05 | 3 | 1936.0087 | 0.862519 | 26.93205 | 0 |
| 15609880 | M12(Oxid: | 0 | 0     | 8.47E-05 | 48.16 | 3.97E-05 | 3 | 1952.0022 | 0.146064 | 21.68477 | 0 |
| 15609880 | M13(Oxid: | 0 | 0     | 0.03234  | 40.76 | 0.000176 | 4 | 2108.1029 | -0.06656 | 20.82616 | 1 |
| 15609880 | N-Term(A  | 0 | 0     | 0.00991  | 40.12 | 0.000107 | 2 | 1313.6557 | -0.17056 | 45.42235 | 0 |
| 15609880 | M3(Oxidat | 0 | 0     | 0.01734  | 37.44 | 0.000261 | 2 | 1088.5403 | -0.19797 | 21.93682 | 0 |
| 15609880 | N-Term(A  | 0 | 0     | 0.0146   | 35.26 | 0.000313 | 3 | 2791.3061 | -0.16726 | 37.53306 | 0 |
| 15609880 |           | 0 | 0     | 0.02126  | 33.73 | 0.000868 | 2 | 1072.5452 | -0.38943 | 24.37908 | 0 |
| 15609880 |           | 0 | 0     | 0.06312  | 32.6  | 0.001182 | 4 | 2092.1076 | -0.28041 | 23.84085 | 1 |
| 15609880 |           | 0 | 0     | 0.0291   | 26.63 | 0.00239  | 3 | 1252.7159 | -0.1479  | 25.5267  | 1 |
| 15609880 |           | 0 | 0.003 | 0.2068   | 33.77 | 0.000419 | 2 | 797.45226 | 0.797253 | 19.87143 | 0 |
| 15609880 | N-Term(A  | 0 | 0.003 | 0.1223   | 30.46 | 0.001394 | 3 | 1322.6366 | 2.286353 | 19.30869 | 1 |
| 15609880 |           | 0 | 0.003 | 0.1322   | 21.1  | 0.010091 | 3 | 1463.8449 | 0.465545 | 18.45882 | 1 |
| 15609880 | N-Term(A  | 0 | 0.003 | 0.1671   | 18.81 | 0.017098 | 3 | 2080.107  | -0.18149 | 46.81402 | 0 |
| 15610137 |           | 0 | 0     | 0.008443 | 88.95 | 1.27E-09 | 2 | 2063.1807 | -2.57837 | 40.43659 | 0 |
| 15610137 |           | 0 | 0     | 0.02473  | 81.13 | 1.19E-08 | 2 | 1147.6462 | 2.739924 | 21.0262  | 1 |
| 15610137 |           | 0 | 0     | 0.033    | 73.23 | 4.74E-08 | 2 | 1923.0893 | -3.01614 | 47.09251 | 0 |
| 15610137 |           | 0 | 0     | 0.02784  | 71.16 | 7.64E-08 | 2 | 2219.2864 | -0.32747 | 40.96831 | 1 |
| 15610137 | N-Term(A  | 0 | 0     | 0.02581  | 61.54 | 1.96E-06 | 2 | 1385.7752 | 0.30148  | 31.24352 | 1 |
| 15610137 |           | 0 | 0     | 0.06871  | 61.23 | 9.04E-07 | 2 | 1343.7632 | -0.72938 | 22.78085 | 1 |
| 15610137 |           | 0 | 0     | 0.03998  | 54.12 | 3.86E-06 | 3 | 2375.3877 | -0.2538  | 38.31064 | 2 |
| 15610137 | N-Term(A  | 0 | 0     | 0.0917   | 51.58 | 6.93E-06 | 3 | 2261.2965 | -0.54588 | 44.8339  | 1 |
| 15610137 | N-Term(A  | 0 | 0     | 0.1379   | 47.61 | 2.51E-05 | 2 | 1214.6324 | -2.25128 | 39.82718 | 0 |
| 15610137 |           | 0 | 0     | 0.2556   | 47.14 | 4.15E-05 | 2 | 801.48241 | -0.63989 | 25.02012 | 0 |
| 15610137 |           | 0 | 0     | 0.1579   | 46.48 | 2.7E-05  | 2 | 1095.59   | -0.53659 | 17.60488 | 0 |
| 15610137 |           | 0 | 0     | 0.2228   | 43.33 | 4.88E-05 | 2 | 997.52178 | 0.345671 | 19.50407 | 0 |
| 15610137 | C2(Carban | 0 | 0     | 0.2282   | 42.57 | 0.000108 | 2 | 904.46672 | -0.2575  | 17.92893 | 0 |
| 15610137 |           | 0 | 0     | 0.03207  | 41.24 | 7.5E-05  | 3 | 2734.5393 | 0.091238 | 45.56955 | 1 |
| 15610137 |           | 0 | 0     | 0.1502   | 37.86 | 0.00018  | 4 | 1878.0552 | -0.25815 | 28.84783 | 1 |
| 15610137 | N-Term(A  | 0 | 0     | 0.03836  | 35.63 | 0.000274 | 3 | 2776.5465 | -1.14329 | 45.42308 | 1 |
| 15610137 |           | 0 | 0     | 0.2349   | 34.25 | 0.00077  | 2 | 1041.5837 | -0.36054 | 26.06385 | 0 |
| 15610137 |           | 0 | 0     | 0.3253   | 34.06 | 0.00053  | 2 | 1069.5525 | -1.1813  | 19.67626 | 0 |
| 15610137 |           | 0 | 0     | 0.2366   | 33.72 | 0.001146 | 2 | 1129.6464 | 0.034173 | 27.8288  | 0 |
| 15610137 |           | 0 | 0     | 0.3395   | 27.76 | 0.003852 | 2 | 1424.7742 | -1.09054 | 20.69755 | 1 |

|          |           |   |       |          |        |          |   |           |          |          |   |
|----------|-----------|---|-------|----------|--------|----------|---|-----------|----------|----------|---|
| 15610137 |           | 0 | 0     | 0.286    | 27.74  | 0.004375 | 3 | 1853.9608 | -0.52469 | 28.03486 | 1 |
| 15610137 |           | 0 | 0.006 | 0.3422   | 35.02  | 0.000881 | 2 | 803.42504 | -0.9533  | 17.07463 | 0 |
| 15610831 |           | 0 | 0     | 0.4607   | 61.25  | 7.48E-07 | 2 | 980.55205 | -0.36892 | 35.73096 | 0 |
| 15610831 |           | 0 | 0     | 0.1461   | 59.89  | 3.28E-06 | 2 | 800.46196 | -0.71164 | 17.59442 | 0 |
| 15610831 |           | 0 | 0     | 0.2818   | 57.61  | 3.64E-06 | 3 | 2195.1656 | -0.01358 | 29.76495 | 0 |
| 15610831 | M7(Oxidat | 0 | 0     | 0.1874   | 56.9   | 3.27E-06 | 4 | 3303.7208 | 0.36916  | 45.37411 | 0 |
| 15610831 |           | 0 | 0     | 0.2807   | 52.24  | 5.96E-06 | 3 | 2202.3025 | 0.654793 | 43.75685 | 0 |
| 15610831 | M16(Oxid: | 0 | 0     | 0.2716   | 47.73  | 3.88E-05 | 3 | 2211.1589 | -0.72253 | 27.7918  | 0 |
| 15610831 |           | 0 | 0     | 0.2622   | 41.54  | 0.000144 | 2 | 1758.8943 | -0.74853 | 26.22189 | 1 |
| 15610831 |           | 0 | 0     | 0.2335   | 31.22  | 0.001397 | 4 | 3287.7248 | 0.012425 | 47.65809 | 0 |
| 15610831 | M12(Oxid: | 0 | 0     | 0.3928   | 19.19  | 0.027113 | 3 | 1774.8889 | -0.94494 | 23.28292 | 1 |
| 15610928 |           | 0 | 0     | 5.57E-16 | 98.03  | 1.57E-10 | 2 | 1574.8956 | 0.872509 | 48.93375 | 0 |
| 15610928 |           | 0 | 0     | 5.57E-16 | 94.69  | 6.28E-10 | 3 | 2339.1452 | 2.127054 | 43.79765 | 0 |
| 15610928 |           | 0 | 0     | 5.57E-16 | 68.62  | 1.37E-07 | 3 | 4072.9804 | 0.176914 | 46.19836 | 0 |
| 15610928 |           | 0 | 0     | 1.96E-14 | 66.92  | 3.96E-07 | 2 | 1513.778  | 1.44037  | 21.7499  | 0 |
| 15610928 |           | 0 | 0     | 4.6E-12  | 57.61  | 4.68E-06 | 2 | 890.47252 | -0.64073 | 24.45936 | 0 |
| 15610928 |           | 0 | 0     | 9.11E-10 | 52.81  | 6.28E-06 | 2 | 1155.5662 | 0.699578 | 17.67601 | 0 |
| 15610928 | N-Term(A  | 0 | 0     | 2.82E-09 | 52.43  | 1.34E-05 | 2 | 932.48302 | -0.68367 | 31.97392 | 0 |
| 15610928 |           | 0 | 0     | 1.37E-08 | 49.85  | 1.66E-05 | 2 | 1152.6006 | -3.63332 | 29.61199 | 0 |
| 15610928 |           | 0 | 0     | 5.84E-07 | 48.12  | 2.7E-05  | 4 | 2232.1503 | -0.80731 | 24.86922 | 2 |
| 15610928 |           | 0 | 0     | 9.81E-08 | 44.69  | 6.45E-05 | 3 | 1669.8741 | -1.7269  | 23.88847 | 1 |
| 15610928 |           | 0 | 0     | 1.61E-07 | 43.74  | 5.28E-05 | 3 | 2446.3482 | -0.51204 | 47.02425 | 1 |
| 15610928 |           | 0 | 0     | 0.002452 | 41.7   | 0.000152 | 4 | 2060.1049 | 0.586283 | 25.789   | 2 |
| 15610928 |           | 0 | 0     | 1.42E-08 | 41.19  | 7.59E-05 | 2 | 766.40929 | -0.14741 | 23.36889 | 0 |
| 15610928 |           | 0 | 0     | 6.58E-09 | 41.02  | 0.000245 | 2 | 1484.8101 | 1.195367 | 40.20002 | 0 |
| 15610928 |           | 0 | 0     | 6.54E-07 | 40.2   | 0.000215 | 3 | 2650.322  | -0.52322 | 24.93265 | 1 |
| 15610928 |           | 0 | 0     | 6.13E-06 | 37.42  | 0.000362 | 3 | 1637.8648 | 0.115993 | 33.54906 | 1 |
| 15610928 |           | 0 | 0     | 3.95E-05 | 32.1   | 0.000678 | 2 | 922.50768 | -3.08323 | 19.69245 | 1 |
| 15610928 |           | 0 | 0     | 0.005801 | 31.92  | 0.000803 | 4 | 1793.9663 | 0.311042 | 31.71203 | 2 |
| 15610928 | N-Term(A  | 0 | 0     | 7.74E-05 | 28.07  | 0.002651 | 2 | 1555.7858 | -0.36772 | 24.3969  | 0 |
| 15610928 | M11(Oxid: | 0 | 0     | 0.004672 | 22.31  | 0.0141   | 2 | 1500.8023 | -0.63473 | 37.05159 | 0 |
| 15610928 |           | 0 | 0     | 3.75E-07 | 21.04  | 0.009051 | 4 | 4229.0895 | 2.047    | 44.79568 | 1 |
| 15610928 |           | 0 | 0     | 0.09076  | 17.58  | 0.027933 | 2 | 1308.7059 | -0.06354 | 25.78258 | 1 |
| 15610241 |           | 0 | 0     | 5.45E-16 | 114.57 | 9.25E-12 | 2 | 2223.1307 | -0.90794 | 41.57571 | 0 |
| 15610241 | M16(Oxid: | 0 | 0     | 5.45E-16 | 100.95 | 1.29E-10 | 2 | 2239.1299 | 1.042419 | 38.98692 | 0 |
| 15610241 |           | 0 | 0     | 5.45E-16 | 84.35  | 4.41E-09 | 2 | 1509.8283 | 0.710921 | 31.61615 | 0 |



|          |           |   |       |          |       |          |   |           |          |          |   |
|----------|-----------|---|-------|----------|-------|----------|---|-----------|----------|----------|---|
| 15610241 |           | 0 | 0     | 4.04E-12 | 64.91 | 4.52E-07 | 2 | 1045.5888 | -0.05603 | 35.40572 | 0 |
| 15610241 | M12(Oxid  | 0 | 0     | 5.45E-16 | 62.9  | 8.21E-07 | 3 | 3070.4648 | -0.88242 | 40.3412  | 0 |
| 15610241 | C9(Carban | 0 | 0     | 2.39E-11 | 55.82 | 2.88E-06 | 2 | 1620.7554 | 0.396971 | 15.88055 | 0 |
| 15610241 |           | 0 | 0     | 2.71E-09 | 51.67 | 1.94E-05 | 2 | 1203.6507 | 2.136055 | 23.47692 | 1 |
| 15610241 |           | 0 | 0     | 7.73E-07 | 33.99 | 0.001097 | 2 | 1676.8479 | -0.66989 | 29.37567 | 0 |
| 15610929 | C17(Carba | 0 | 0     | 0.009851 | 87.66 | 3E-09    | 2 | 2050.1111 | -0.16278 | 39.22273 | 0 |
| 15610929 |           | 0 | 0     | 0.03004  | 80.08 | 2.99E-08 | 2 | 1113.6265 | 0.180619 | 29.84539 | 0 |
| 15610929 |           | 0 | 0     | 0.04439  | 77.68 | 3.92E-08 | 2 | 2229.1785 | 0.409611 | 30.85328 | 0 |
| 15610929 |           | 0 | 0     | 0.08564  | 66.7  | 4.17E-07 | 3 | 2571.3437 | 0.338649 | 28.9796  | 1 |
| 15610929 |           | 0 | 0     | 0.1467   | 59.28 | 3.01E-06 | 2 | 1031.5265 | -0.363   | 21.70485 | 0 |
| 15610929 |           | 0 | 0     | 0.2208   | 41.49 | 7.08E-05 | 2 | 957.59685 | -1.15074 | 25.36763 | 0 |
| 15610929 |           | 0 | 0     | 0.1448   | 35.63 | 0.000438 | 3 | 3424.6915 | -7.551   | 42.22481 | 0 |
| 15610929 |           | 0 | 0     | 0.321    | 28.78 | 0.002516 | 3 | 1140.6854 | 0.523492 | 23.4636  | 1 |
| 57116830 | M5(Oxidat | 0 | 0     | 1.9E-11  | 97.7  | 1.69E-10 | 2 | 1541.6373 | -0.80542 | 17.93241 | 0 |
| 57116830 |           | 0 | 0     | 2.8E-06  | 88.27 | 1.49E-09 | 2 | 1525.6425 | -0.70636 | 22.14833 | 0 |
| 57116830 |           | 0 | 0     | 1.23E-05 | 85.95 | 2.53E-09 | 2 | 1653.7342 | -2.64422 | 21.6244  | 1 |
| 57116830 |           | 0 | 0     | 5.31E-05 | 71.43 | 7.18E-08 | 2 | 1714.801  | -1.29483 | 23.87684 | 0 |
| 57116830 | N-Term(A  | 0 | 0     | 1.74E-06 | 61.31 | 7.38E-07 | 2 | 1695.7612 | 7.099878 | 24.177   | 1 |
| 57116830 |           | 0 | 0     | 8.68E-09 | 52.67 | 5.39E-06 | 3 | 2383.0918 | -1.33452 | 22.32297 | 1 |
| 57116830 |           | 0 | 0     | 2.16E-08 | 47.9  | 3.08E-05 | 3 | 2180.1416 | -0.76446 | 16.62692 | 1 |
| 57116830 |           | 0 | 0     | 2.15E-08 | 44.47 | 3.57E-05 | 3 | 1809.838  | -0.89757 | 20.03939 | 2 |
| 57116830 | M6(Oxidat | 0 | 0     | 8.49E-05 | 43.61 | 4.34E-05 | 3 | 1825.8338 | -0.44468 | 15.89843 | 2 |
| 57116830 |           | 0 | 0     | 1.62E-07 | 43.51 | 4.45E-05 | 2 | 1182.5423 | -0.26838 | 18.70106 | 0 |
| 57116830 |           | 0 | 0     | 5.12E-05 | 40.85 | 8.2E-05  | 2 | 1265.5972 | -0.76306 | 11.70636 | 2 |
| 57116830 |           | 0 | 0     | 2.77E-10 | 39.78 | 0.000274 | 3 | 2024.0401 | -0.98172 | 19.95935 | 0 |
| 57116830 |           | 0 | 0     | 0.000284 | 38.31 | 0.000325 | 2 | 1873.9251 | -0.71768 | 17.99124 | 1 |
| 57116830 |           | 0 | 0     | 1.76E-08 | 35.86 | 0.000584 | 3 | 2117.0584 | -0.54155 | 14.50927 | 2 |
| 57116830 | M5(Oxidat | 0 | 0     | 0.005437 | 35.29 | 0.000295 | 2 | 1697.7371 | -1.47735 | 16.58767 | 1 |
| 57116830 |           | 0 | 0     | 0.000248 | 33.84 | 0.000412 | 4 | 2831.2992 | -1.00175 | 23.06437 | 2 |
| 57116830 |           | 0 | 0     | 0.000767 | 32.03 | 0.000625 | 3 | 2163.0119 | 0.769146 | 21.22246 | 1 |
| 57116830 |           | 0 | 0     | 0.001964 | 27.97 | 0.004149 | 4 | 2030.0253 | -1.11922 | 14.33868 | 2 |
| 57116830 | N-Term(A  | 0 | 0.003 | 0.008904 | 39.19 | 0.00012  | 2 | 1756.81   | -2.13579 | 22.37185 | 0 |
| 57116830 |           | 0 | 0.003 | 0.01588  | 28.65 | 0.002729 | 3 | 1369.7184 | -0.90045 | 12.16063 | 0 |
| 57116830 |           | 0 | 0.003 | 0.01108  | 26.97 | 0.002004 | 2 | 1109.4961 | -0.82916 | 12.47107 | 1 |
| 57116830 | N-Term(A  | 0 | 0.003 | 0.008716 | 25.51 | 0.006186 | 4 | 2066.0468 | -2.86183 | 18.30732 | 0 |
| 57116830 |           | 0 | 0.003 | 0.01461  | 15.26 | 0.038721 | 2 | 1338.6432 | -0.36247 | 17.60265 | 1 |

|          |           |   |       |          |        |          |   |           |          |          |   |
|----------|-----------|---|-------|----------|--------|----------|---|-----------|----------|----------|---|
| 57116830 |           | 0 | 0.003 | 0.008716 | 13.47  | 0.110196 | 3 | 1525.8191 | -1.07834 | 12.87114 | 1 |
| 57116830 |           | 0 | 0.003 | 0.009464 | 11.21  | 0.075504 | 3 | 1960.9235 | 2.378862 | 22.65614 | 1 |
| 15609332 |           | 0 | 0     | 1.74E-10 | 80.01  | 1.4E-08  | 2 | 1213.621  | -0.14174 | 29.86408 | 0 |
| 15609332 |           | 0 | 0     | 2.94E-08 | 71.15  | 1.76E-07 | 2 | 1401.7651 | 0.892409 | 29.88242 | 1 |
| 15609332 | C2(Carban | 0 | 0     | 4.08E-07 | 69.52  | 1.11E-07 | 2 | 2170.9595 | -2.29348 | 24.03299 | 0 |
| 15609332 |           | 0 | 0     | 5.15E-05 | 66.88  | 3.9E-07  | 2 | 1232.6115 | -3.49949 | 24.75378 | 0 |
| 15609332 |           | 0 | 0     | 0.00086  | 63.98  | 5.6E-07  | 2 | 1883.8974 | 0.544173 | 39.96939 | 1 |
| 15609332 | M20(Oxid  | 0 | 0     | 0.000315 | 63.96  | 4.01E-07 | 3 | 2526.1847 | -1.70208 | 23.99902 | 1 |
| 15609332 |           | 0 | 0     | 0.008098 | 60.55  | 1.85E-06 | 2 | 1030.5722 | 0.727609 | 26.67953 | 0 |
| 15609332 | M6(Oxidat | 0 | 0     | 3.57E-06 | 57.08  | 5.29E-06 | 2 | 1046.5657 | -0.60663 | 22.1103  | 0 |
| 15609332 |           | 0 | 0     | 8.66E-06 | 56.59  | 5.59E-06 | 2 | 1273.6696 | 0.598242 | 33.94068 | 0 |
| 15609332 |           | 0 | 0     | 0.05941  | 54.61  | 1.73E-05 | 2 | 842.49187 | 0.17518  | 27.66107 | 0 |
| 15609332 | N-Term(A  | 0 | 0     | 0.04072  | 52.58  | 6.35E-06 | 2 | 1255.6296 | -1.74582 | 30.64154 | 0 |
| 15609332 |           | 0 | 0     | 7.52E-07 | 52.53  | 7.26E-06 | 2 | 1854.0439 | -0.78232 | 35.482   | 1 |
| 15609332 | M6(Oxidat | 0 | 0     | 2.76E-05 | 51.93  | 6.4E-06  | 3 | 2156.9187 | -0.59205 | 30.41352 | 0 |
| 15609332 | M13(Oxid  | 0 | 0     | 8.07E-05 | 49.21  | 1.92E-05 | 3 | 1870.0396 | -0.31568 | 33.9972  | 1 |
| 15609332 | M4(Oxidat | 0 | 0     | 0.002064 | 47.16  | 7.98E-05 | 2 | 858.48631 | -0.37463 | 24.24992 | 0 |
| 15609332 | M6(Oxidat | 0 | 0     | 6.91E-05 | 45.94  | 3.44E-05 | 3 | 1886.0354 | 0.117817 | 31.30137 | 1 |
| 15609332 | M11(Oxid  | 0 | 0     | 0.000377 | 44.96  | 3.18E-05 | 3 | 2140.9316 | 3.043725 | 32.23365 | 0 |
| 15609332 | M1(Oxidat | 0 | 0     | 0.02462  | 41.9   | 6.44E-05 | 3 | 2172.9133 | -0.71936 | 29.74228 | 0 |
| 15609332 |           | 0 | 0     | 0.001525 | 38.95  | 0.000299 | 2 | 885.51598 | 0.775225 | 19.43385 | 0 |
| 15609332 | C3(Carban | 0 | 0     | 2.13E-05 | 33.4   | 0.000823 | 3 | 2881.4361 | -1.01685 | 32.93391 | 0 |
| 15610006 |           | 0 | 0     | 2.82E-12 | 113.89 | 4.29E-12 | 2 | 1751.8271 | 0.052897 | 34.28084 | 0 |
| 15610006 |           | 0 | 0     | 3.24E-14 | 109.98 | 1.61E-11 | 2 | 1767.8752 | -0.47041 | 31.58391 | 0 |
| 15610006 | C8(Carban | 0 | 0     | 6.86E-15 | 109    | 2.33E-11 | 2 | 1732.8528 | -0.39501 | 25.20614 | 0 |
| 15610006 | M12(Oxid  | 0 | 0     | 2.45E-10 | 92.88  | 5.14E-10 | 2 | 1767.8218 | -0.04036 | 27.16114 | 0 |
| 15610006 | C4(Carban | 0 | 0     | 6.81E-08 | 91.13  | 1.35E-09 | 2 | 1610.8334 | 0.885456 | 28.02269 | 0 |
| 15610006 | C8(Carban | 0 | 0     | 3.5E-08  | 84.38  | 6.75E-09 | 3 | 3324.661  | -2.01086 | 32.60793 | 1 |
| 15610006 |           | 0 | 0     | 0.001939 | 53.52  | 9.56E-06 | 2 | 2319.2254 | 2.090394 | 31.74442 | 0 |
| 15610006 |           | 0 | 0     | 0.000462 | 52.83  | 7.82E-06 | 2 | 1179.6469 | -1.01989 | 20.78693 | 0 |
| 15610006 | N-Term(A  | 0 | 0     | 0.001471 | 48.43  | 1.65E-05 | 2 | 2478.1958 | -9.02992 | 33.75397 | 1 |
| 15610006 |           | 0 | 0     | 0.05569  | 36.55  | 0.000354 | 2 | 1307.7431 | 0.013987 | 19.26304 | 1 |
| 15610040 | C11(Carba | 0 | 0     | 1.02E-09 | 84.2   | 9.12E-09 | 2 | 1287.6834 | -0.34798 | 23.76546 | 0 |
| 15610040 |           | 0 | 0     | 2.68E-09 | 72.23  | 1.8E-07  | 2 | 1418.7416 | -0.79405 | 44.2928  | 0 |
| 15610040 |           | 0 | 0     | 0.000662 | 58.88  | 1.29E-06 | 2 | 1730.8019 | -0.51064 | 20.22526 | 1 |
| 15610040 |           | 0 | 0     | 1.62E-05 | 57.64  | 2.15E-06 | 2 | 1124.6138 | 0.467565 | 27.11121 | 1 |

|          |           |   |   |          |        |          |   |           |          |          |   |
|----------|-----------|---|---|----------|--------|----------|---|-----------|----------|----------|---|
| 15610040 | M2(Oxidat | 0 | 0 | 0.000114 | 48.44  | 2.15E-05 | 2 | 1140.6095 | 1.173381 | 25.26648 | 1 |
| 15610040 | M4(Oxidat | 0 | 0 | 0.004043 | 47.66  | 1.71E-05 | 2 | 992.46196 | 0.075934 | 29.20953 | 0 |
| 15610040 |           | 0 | 0 | 0.001203 | 47.62  | 2.59E-05 | 2 | 1104.5469 | -0.35191 | 25.01796 | 0 |
| 15610040 |           | 0 | 0 | 0.001598 | 47.44  | 3.79E-05 | 3 | 2544.3257 | 0.415217 | 40.75847 | 1 |
| 15610040 | C12(Carba | 0 | 0 | 2.79E-07 | 45.62  | 6.31E-05 | 2 | 1443.7845 | -0.34207 | 19.30482 | 1 |
| 15610040 |           | 0 | 0 | 9.58E-05 | 39.55  | 0.000227 | 2 | 976.4677  | 0.745202 | 24.12483 | 0 |
| 15610040 |           | 0 | 0 | 0.001957 | 37.23  | 0.000189 | 2 | 967.57225 | -0.16444 | 32.86839 | 0 |
| 15610040 | M4(Oxidat | 0 | 0 | 0.1061   | 36.82  | 0.000207 | 2 | 1746.7979 | 0.098959 | 16.94697 | 1 |
| 15610040 |           | 0 | 0 | 0.04103  | 30.92  | 0.000807 | 2 | 782.4262  | -0.76204 | 11.26492 | 0 |
| 15610040 |           | 0 | 0 | 1.87E-06 | 29.78  | 0.00263  | 3 | 2504.2729 | 0.255564 | 35.64125 | 1 |
| 15610040 | C3(Carban | 0 | 0 | 0.004295 | 28.94  | 0.003    | 3 | 2544.2972 | 0.838736 | 34.51551 | 0 |
| 15610040 |           | 0 | 0 | 0.001794 | 19.34  | 0.015134 | 3 | 1564.9109 | -0.19139 | 35.2556  | 1 |
| 15610040 |           | 0 | 0 | 0.1061   | 14.99  | 0.06973  | 3 | 2388.2254 | 0.768206 | 42.72978 | 0 |
| 15610375 |           | 0 | 0 | 0.010213 | 125.24 | 5.09E-13 | 2 | 2006.0656 | -0.52937 | 43.494   | 0 |
| 15610375 |           | 0 | 0 | 0.03043  | 109.64 | 2.55E-11 | 2 | 1691.9073 | -0.18744 | 32.25672 | 0 |
| 15610375 |           | 0 | 0 | 0.1437   | 97.3   | 4.66E-10 | 2 | 1306.7006 | 0.304448 | 40.65109 | 0 |
| 15610375 |           | 0 | 0 | 0.03415  | 89.61  | 1.15E-09 | 3 | 3274.7593 | 1.471608 | 40.96942 | 0 |
| 15610375 | N-Term(A  | 0 | 0 | 0.1909   | 85.13  | 7.37E-09 | 2 | 1348.7094 | -1.0218  | 47.55081 | 0 |
| 15610375 |           | 0 | 0 | 0.1234   | 78.87  | 1.88E-08 | 2 | 1415.7065 | -0.14325 | 31.15428 | 0 |
| 15610375 |           | 0 | 0 | 0.215    | 68.84  | 1.7E-07  | 2 | 2115.1714 | 0.814599 | 42.51916 | 1 |
| 15610375 |           | 0 | 0 | 0.1606   | 66.45  | 3.4E-07  | 2 | 1462.8018 | 0.324112 | 35.63984 | 1 |
| 15610375 | N-Term(A  | 0 | 0 | 0.1677   | 64.75  | 3.68E-07 | 3 | 3316.7611 | -1.1803  | 44.79927 | 0 |
| 15610375 | C7(Carban | 0 | 0 | 0.1683   | 62.65  | 1.52E-06 | 2 | 1131.6198 | 0.603803 | 28.82511 | 0 |
| 15610375 | M7(Oxidat | 0 | 0 | 0.1612   | 56.91  | 3.77E-06 | 2 | 1411.7178 | -0.50666 | 28.74752 | 0 |
| 15610375 |           | 0 | 0 | 0.1925   | 52.48  | 1.16E-05 | 2 | 1395.722  | -1.18209 | 34.35594 | 0 |
| 15610375 | M15(Oxid. | 0 | 0 | 0.1315   | 51.79  | 9.6E-06  | 3 | 1686.8452 | -1.69449 | 25.15408 | 1 |
| 15610375 | C1(Carban | 0 | 0 | 0.1977   | 48.83  | 3.34E-05 | 2 | 1032.5505 | -0.22533 | 33.66865 | 0 |
| 15610375 |           | 0 | 0 | 0.1984   | 46.27  | 7.08E-05 | 2 | 1058.5663 | -0.02789 | 27.96778 | 0 |
| 15610375 | C7(Carban | 0 | 0 | 0.1654   | 39.39  | 0.000121 | 3 | 2586.4023 | 6.209603 | 38.51479 | 1 |
| 15610375 |           | 0 | 0 | 0.09956  | 22.98  | 0.00579  | 5 | 3687.9579 | 0.312287 | 39.97365 | 1 |
| 15609331 |           | 0 | 0 | 4.73E-08 | 76.26  | 6.51E-08 | 2 | 1258.6386 | -0.05077 | 23.99629 | 0 |
| 15609331 | M1(Oxidat | 0 | 0 | 0.000684 | 29.97  | 0.001005 | 3 | 1346.6287 | -1.28805 | 12.59819 | 1 |
| 15610336 |           | 0 | 0 | 2.6E-13  | 125.51 | 5.2E-13  | 2 | 1563.7604 | -0.35666 | 27.20758 | 0 |
| 15610336 |           | 0 | 0 | 2.02E-09 | 104.74 | 1.07E-10 | 2 | 1274.6965 | 1.049216 | 46.072   | 0 |
| 15610336 |           | 0 | 0 | 1.49E-09 | 96.67  | 2.69E-10 | 2 | 1442.7118 | -0.28537 | 24.50989 | 0 |
| 15610336 |           | 0 | 0 | 3.17E-15 | 82.49  | 5.62E-09 | 2 | 1257.6069 | -0.14486 | 19.04777 | 0 |

|          |           |   |   |          |        |          |   |           |          |          |   |
|----------|-----------|---|---|----------|--------|----------|---|-----------|----------|----------|---|
| 15610336 |           | 0 | 0 | 8.2E-09  | 81.92  | 1.12E-08 | 2 | 1381.7426 | -0.63687 | 20.60297 | 0 |
| 15610336 |           | 0 | 0 | 5.53E-07 | 76.45  | 4.98E-08 | 2 | 1611.8833 | 1.232769 | 42.01703 | 0 |
| 15610336 |           | 0 | 0 | 1.28E-11 | 75.75  | 3.33E-08 | 3 | 2867.5572 | -0.49422 | 33.23729 | 1 |
| 15610336 |           | 0 | 0 | 9.49E-06 | 74.17  | 7.27E-08 | 2 | 1443.8067 | -0.02291 | 18.76763 | 1 |
| 15610336 |           | 0 | 0 | 5.34E-07 | 65.96  | 6.08E-07 | 2 | 2871.4588 | -2.42506 | 40.66251 | 0 |
| 15610336 | M6(Oxidat | 0 | 0 | 6.05E-16 | 64.58  | 7.49E-07 | 3 | 2887.4608 | 0.042337 | 38.13357 | 0 |
| 15610336 |           | 0 | 0 | 1.93E-05 | 63.77  | 6.09E-07 | 2 | 870.54106 | 0.323849 | 28.89887 | 0 |
| 15610336 |           | 0 | 0 | 0.000539 | 57.85  | 1.64E-06 | 3 | 1276.7851 | 0.146487 | 29.85674 | 1 |
| 15610336 |           | 0 | 0 | 1.99E-08 | 55.91  | 2.56E-06 | 4 | 3109.6752 | 1.582257 | 46.98248 | 0 |
| 15610336 |           | 0 | 0 | 0.05267  | 54.71  | 3.37E-06 | 2 | 1552.9158 | -0.78705 | 33.33192 | 1 |
| 15610336 |           | 0 | 0 | 1.22E-05 | 53.27  | 8.71E-06 | 2 | 1109.5705 | 0.577583 | 16.30621 | 0 |
| 15610336 |           | 0 | 0 | 1.36E-05 | 50.02  | 3.78E-05 | 3 | 1952.0519 | -2.16096 | 23.83778 | 1 |
| 15610336 |           | 0 | 0 | 0.1194   | 39.02  | 0.000125 | 4 | 1959.1627 | 0.816233 | 33.46407 | 2 |
| 15610336 |           | 0 | 0 | 0.000608 | 26.26  | 0.005323 | 3 | 1188.6361 | -0.92525 | 19.49997 | 0 |
| 15610336 |           | 0 | 0 | 1.34E-08 | 26.17  | 0.004106 | 3 | 2101.1317 | 1.354851 | 34.39058 | 1 |
| 15610941 |           | 0 | 0 | 3.15E-14 | 94.14  | 8.29E-10 | 2 | 1846.0179 | -0.18496 | 33.92394 | 0 |
| 15610941 |           | 0 | 0 | 4.1E-12  | 86.88  | 2.05E-09 | 2 | 2478.1846 | 0.349696 | 28.65899 | 0 |
| 15610941 |           | 0 | 0 | 3.43E-05 | 82.66  | 5.69E-09 | 2 | 1138.5657 | -7.20193 | 48.08397 | 0 |
| 15610941 |           | 0 | 0 | 9.1E-06  | 62.73  | 1.28E-06 | 2 | 1612.8128 | 0.576905 | 32.80647 | 0 |
| 15610941 |           | 0 | 0 | 1.91E-08 | 55.62  | 6.17E-06 | 3 | 2634.2823 | -0.96783 | 26.48978 | 1 |
| 15610941 |           | 0 | 0 | 0.000109 | 53.85  | 8.65E-06 | 2 | 1756.9084 | 1.457955 | 43.56753 | 0 |
| 15610941 |           | 0 | 0 | 0.01692  | 50.93  | 8.05E-06 | 2 | 807.48393 | 0.437182 | 18.54036 | 0 |
| 15610941 | C23(Carba | 0 | 0 | 0.2956   | 37.07  | 0.000295 | 3 | 3119.5074 | 0.940567 | 42.95656 | 0 |
| 15610941 | N-Term(A  | 0 | 0 | 0.000375 | 34.22  | 0.000511 | 2 | 1180.5835 | -0.79843 | 25.0261  | 0 |
| 15610941 |           | 0 | 0 | 0.2956   | 34.2   | 0.000456 | 2 | 1294.6742 | -0.61743 | 21.31592 | 1 |
| 15610941 |           | 0 | 0 | 0.001264 | 24.73  | 0.004711 | 2 | 1074.6161 | -0.55353 | 17.71949 | 2 |
| 15610501 |           | 0 | 0 | 9.81E-14 | 115.52 | 7.29E-12 | 2 | 1187.6274 | 0.552054 | 24.27328 | 0 |
| 15610501 |           | 0 | 0 | 6.63E-08 | 95.87  | 3.75E-10 | 2 | 1192.5983 | -0.67676 | 20.73475 | 0 |
| 15610501 |           | 0 | 0 | 2.53E-06 | 95.66  | 6.66E-10 | 2 | 2733.4407 | -0.74627 | 39.55345 | 0 |
| 15610501 | M5(Oxidat | 0 | 0 | 3.87E-11 | 94.86  | 5.23E-10 | 2 | 1208.5911 | -2.41955 | 21.11728 | 0 |
| 15610501 | M3(Oxidat | 0 | 0 | 9.13E-09 | 94.15  | 5.96E-10 | 3 | 2784.3506 | 2.669847 | 37.63561 | 0 |
| 15610501 |           | 0 | 0 | 3.64E-10 | 92.94  | 1.17E-09 | 2 | 1733.882  | 0.907966 | 37.01131 | 0 |
| 15610501 | M1(Oxidat | 0 | 0 | 6.41E-07 | 86.78  | 5.04E-09 | 2 | 2749.441  | 1.19634  | 37.44695 | 0 |
| 15610501 |           | 0 | 0 | 4.22E-10 | 86.15  | 4.85E-09 | 2 | 1406.7155 | 1.699278 | 43.08178 | 0 |
| 15610501 |           | 0 | 0 | 9.98E-08 | 83.62  | 7.6E-09  | 3 | 2386.3138 | 1.996198 | 48.95606 | 1 |
| 15610501 |           | 0 | 0 | 2.61E-07 | 82.93  | 5.08E-09 | 2 | 2115.1814 | 0.247158 | 47.81458 | 0 |

|          |           |   |       |          |        |          |   |           |          |          |   |
|----------|-----------|---|-------|----------|--------|----------|---|-----------|----------|----------|---|
| 15610501 | M1(Oxidat | 0 | 0     | 8.21E-13 | 81.89  | 1.71E-08 | 3 | 2765.4333 | 0.242418 | 35.99109 | 0 |
| 15610501 |           | 0 | 0     | 6.27E-07 | 73.94  | 7.67E-08 | 2 | 943.55675 | -0.43669 | 25.83556 | 0 |
| 15610501 | M3(Oxidat | 0 | 0     | 9.81E-06 | 71.43  | 7.91E-08 | 2 | 2800.3335 | -1.62752 | 33.44902 | 0 |
| 15610501 | M5(Oxidat | 0 | 0     | 5.58E-08 | 70.34  | 1.71E-07 | 2 | 1422.7082 | 0.106263 | 24.27508 | 0 |
| 15610501 |           | 0 | 0     | 3.62E-09 | 69.04  | 1.24E-07 | 4 | 3213.7243 | 0.467548 | 43.68461 | 2 |
| 15610501 |           | 0 | 0     | 0.000019 | 67.07  | 2.65E-07 | 3 | 2942.5971 | 0.832525 | 43.68234 | 1 |
| 15610501 |           | 0 | 0     | 4.26E-10 | 66.09  | 5.78E-07 | 3 | 1715.9029 | -0.36953 | 21.76948 | 1 |
| 15610501 |           | 0 | 0     | 6.69E-05 | 65.39  | 5.06E-07 | 2 | 1069.565  | 1.194602 | 25.5331  | 0 |
| 15610501 | M3(Oxidat | 0 | 0     | 4.06E-05 | 62.01  | 9.44E-07 | 2 | 1438.7035 | 0.415311 | 22.79875 | 0 |
| 15610501 |           | 0 | 0     | 1.31E-05 | 51.95  | 1.05E-05 | 3 | 2768.3492 | 0.341352 | 39.40819 | 0 |
| 15610501 |           | 0 | 0     | 0.003698 | 44.92  | 8.54E-05 | 2 | 846.43157 | -0.05334 | 14.21751 | 0 |
| 15610501 |           | 0 | 0     | 0.0311   | 41.76  | 0.00018  | 2 | 1117.5766 | -1.53512 | 19.5564  | 0 |
| 15610501 | M3(Oxidat | 0 | 0     | 0.02495  | 39.95  | 0.000233 | 2 | 989.53465 | 1.00879  | 21.8631  | 0 |
| 15610501 |           | 0 | 0     | 0.04546  | 39.25  | 0.000119 | 2 | 937.51036 | 0.193321 | 18.36344 | 1 |
| 15610501 |           | 0 | 0     | 0.04927  | 37.34  | 0.000498 | 3 | 1214.6843 | -0.76729 | 23.19799 | 1 |
| 15610501 |           | 0 | 0     | 0.001159 | 30.63  | 0.001989 | 3 | 1342.7548 | -0.20624 | 19.9881  | 1 |
| 15610501 | M6(Oxidat | 0 | 0.006 | 0.1343   | 35.02  | 0.000598 | 2 | 1133.5737 | 0.387886 | 14.99365 | 0 |
| 15610781 |           | 0 | 0     | 0.02324  | 87.81  | 2.98E-09 | 2 | 2366.2371 | 0.814308 | 42.2069  | 0 |
| 15610781 |           | 0 | 0     | 0.1342   | 72.16  | 1E-07    | 2 | 1680.8221 | -0.46538 | 32.88571 | 0 |
| 15610781 |           | 0 | 0     | 0.1516   | 68.18  | 3.57E-07 | 3 | 2694.3655 | 0.686742 | 36.88042 | 0 |
| 15610781 |           | 0 | 0     | 0.1273   | 61.45  | 7.14E-07 | 2 | 1064.5959 | -0.1301  | 15.91454 | 0 |
| 15610781 |           | 0 | 0     | 0.07913  | 61.07  | 1.13E-06 | 2 | 872.52007 | 0.029604 | 20.2927  | 0 |
| 15610781 |           | 0 | 0     | 0.09947  | 60.88  | 2.04E-06 | 2 | 988.5211  | 0.003467 | 26.96886 | 0 |
| 15610781 | M7(Oxidat | 0 | 0     | 0.06837  | 59.95  | 1.01E-06 | 2 | 3059.4014 | 0.883665 | 35.39485 | 0 |
| 15610781 |           | 0 | 0     | 0.07053  | 55.57  | 2.77E-06 | 3 | 3027.4079 | -0.31354 | 40.63139 | 0 |
| 15610781 | M7(Oxidat | 0 | 0     | 0.09558  | 51.77  | 6.64E-06 | 4 | 3043.4135 | 3.179507 | 39.32915 | 0 |
| 15610781 |           | 0 | 0     | 0.2647   | 48.03  | 2.44E-05 | 2 | 946.45781 | -1.15169 | 13.92884 | 0 |
| 15610781 |           | 0 | 0     | 0.1254   | 40.92  | 0.000129 | 2 | 908.44786 | 0.661832 | 19.04604 | 0 |
| 15610781 |           | 0 | 0     | 0.1819   | 35.52  | 0.000337 | 2 | 876.50493 | -0.14933 | 27.97806 | 1 |
| 15610781 | N-Term(A  | 0 | 0     | 0.281    | 30.45  | 0.000899 | 3 | 3101.414  | 1.534564 | 37.60351 | 0 |
| 15610879 |           | 0 | 0     | 0.003568 | 121.23 | 1.7E-12  | 2 | 1501.8223 | 0.127794 | 30.59072 | 0 |
| 15610879 |           | 0 | 0     | 0.000479 | 97.93  | 3.7E-10  | 3 | 2547.3376 | 1.051412 | 35.17208 | 0 |
| 15610879 | C13(Carba | 0 | 0     | 0.01344  | 89.95  | 1.82E-09 | 2 | 1541.7521 | -0.56592 | 26.31711 | 0 |
| 15610879 |           | 0 | 0     | 0.03536  | 80.25  | 1.94E-08 | 2 | 1490.7675 | 2.436566 | 34.32092 | 0 |
| 15610879 |           | 0 | 0     | 0.008386 | 79.71  | 2.14E-08 | 2 | 1908.021  | -0.83207 | 26.39442 | 0 |
| 15610879 | M23(Oxid. | 0 | 0     | 0.02039  | 79.29  | 2.41E-08 | 2 | 2563.3221 | -3.03794 | 31.80519 | 0 |

|          |           |   |       |          |        |          |   |           |          |          |   |
|----------|-----------|---|-------|----------|--------|----------|---|-----------|----------|----------|---|
| 15610879 |           | 0 | 0     | 0.02319  | 76.09  | 6.15E-08 | 2 | 1170.6482 | 0.392653 | 40.4301  | 0 |
| 15610879 |           | 0 | 0     | 0.05904  | 68.96  | 3.37E-07 | 2 | 800.43669 | -0.84728 | 12.28591 | 0 |
| 15610879 |           | 0 | 0     | 0.0261   | 67.29  | 3.55E-07 | 2 | 1684.8943 | -2.03965 | 27.16695 | 1 |
| 15610879 |           | 0 | 0     | 0.08089  | 66.39  | 5.74E-07 | 2 | 1164.6011 | 0.258043 | 31.114   | 1 |
| 15610879 |           | 0 | 0     | 0.01371  | 65.13  | 3.99E-07 | 2 | 1222.6788 | -0.2558  | 22.49376 | 1 |
| 15610879 |           | 0 | 0     | 0.006328 | 63.13  | 5.84E-07 | 2 | 1324.758  | -0.32393 | 24.71959 | 1 |
| 15610879 | C15(Carba | 0 | 0     | 0.03097  | 62.44  | 1.34E-06 | 3 | 1810.937  | -0.62919 | 28.96333 | 1 |
| 15610879 |           | 0 | 0     | 0.01294  | 57.68  | 3.84E-06 | 2 | 1454.8324 | -0.12801 | 22.76918 | 0 |
| 15610879 |           | 0 | 0     | 0.1454   | 55.58  | 3.04E-06 | 2 | 1008.499  | -0.68547 | 28.09018 | 0 |
| 15610879 |           | 0 | 0     | 0.0342   | 43.39  | 4.57E-05 | 2 | 828.44585 | -0.43807 | 21.54671 | 0 |
| 15610879 |           | 0 | 0     | 0.08203  | 39.36  | 0.000145 | 2 | 1296.7494 | -0.10338 | 19.23737 | 1 |
| 15610879 |           | 0 | 0     | 0.04708  | 31.21  | 0.001552 | 3 | 2421.2884 | -0.09791 | 27.73636 | 1 |
| 15610879 | N-Term(A  | 0 | 0.003 | 0.2006   | 27.09  | 0.003909 | 2 | 1366.7764 | 5.442358 | 27.50338 | 1 |
| 15610879 |           | 0 | 0.003 | 0.1993   | 22.48  | 0.014406 | 4 | 2897.5001 | -1.50078 | 38.62685 | 1 |
| 57117003 |           | 0 | 0     | 0.00573  | 116.82 | 5.72E-12 | 2 | 1284.728  | 0.655059 | 34.68195 | 0 |
| 57117003 |           | 0 | 0     | 0.007952 | 98.59  | 2.84E-10 | 2 | 1404.7156 | -0.14774 | 44.6943  | 0 |
| 57117003 |           | 0 | 0     | 0.01215  | 88.63  | 2.4E-09  | 2 | 1627.7978 | 0.918905 | 27.35389 | 0 |
| 57117003 | C10(Carba | 0 | 0     | 0.0415   | 84.58  | 4.35E-09 | 2 | 1442.7109 | 0.795536 | 32.5238  | 0 |
| 57117003 |           | 0 | 0     | 0.00536  | 83.54  | 5.75E-09 | 2 | 1667.9135 | 1.114235 | 38.35056 | 0 |
| 57117003 |           | 0 | 0     | 0.01666  | 77.55  | 1.75E-08 | 2 | 1157.5562 | 1.38105  | 49.32187 | 0 |
| 57117003 |           | 0 | 0     | 0.02611  | 74.33  | 6.46E-08 | 2 | 1540.7961 | 1.250527 | 36.26572 | 0 |
| 57117003 |           | 0 | 0     | 0.06207  | 73.57  | 1.32E-07 | 2 | 1302.6803 | 0.179745 | 21.85776 | 0 |
| 57117003 | M8(Oxidat | 0 | 0     | 0.00338  | 72.6   | 1.02E-07 | 2 | 2493.2554 | -1.68359 | 39.49729 | 0 |
| 57117003 |           | 0 | 0     | 0.002185 | 72.56  | 8.32E-08 | 2 | 1791.0018 | 0.326791 | 46.60152 | 0 |
| 57117003 | N-Term(A  | 0 | 0     | 0.025    | 71.31  | 1.96E-07 | 2 | 1326.7393 | 1.227906 | 35.40052 | 0 |
| 57117003 | M9(Oxidat | 0 | 0     | 0.09108  | 68.46  | 2.49E-07 | 2 | 1556.7886 | -0.27909 | 32.20007 | 0 |
| 57117003 |           | 0 | 0     | 0.0127   | 67.23  | 2.46E-07 | 2 | 1952.9377 | -0.32855 | 29.87121 | 0 |
| 57117003 |           | 0 | 0     | 0.002203 | 66.53  | 5.22E-07 | 3 | 2262.19   | 0.97927  | 44.24698 | 0 |
| 57117003 |           | 0 | 0     | 0.003778 | 62.71  | 1.15E-06 | 2 | 2477.2657 | 0.392085 | 39.39908 | 0 |
| 57117003 |           | 0 | 0     | 0.03792  | 62.16  | 1.28E-06 | 2 | 1628.8339 | -0.76214 | 21.79428 | 1 |
| 57117003 |           | 0 | 0     | 0.09031  | 56.08  | 3.45E-06 | 2 | 1450.7685 | -0.31093 | 32.24879 | 0 |
| 57117003 |           | 0 | 0     | 0.03763  | 55.79  | 2.63E-06 | 2 | 2191.0286 | -0.75729 | 29.13092 | 1 |
| 57117003 |           | 0 | 0     | 0.008892 | 54.33  | 7.38E-06 | 4 | 2618.3976 | 1.436915 | 37.87658 | 1 |
| 57117003 |           | 0 | 0     | 0.01278  | 54.28  | 3.72E-06 | 3 | 2828.5845 | -1.29552 | 42.47546 | 1 |
| 57117003 | M16(Oxid. | 0 | 0     | 0.08083  | 53.98  | 5.4E-06  | 2 | 1968.9274 | -2.95112 | 26.40765 | 0 |
| 57117003 |           | 0 | 0     | 0.009088 | 53.78  | 1.05E-05 | 3 | 2719.3366 | -1.85275 | 38.92183 | 0 |

|          |           |   |       |          |        |          |   |           |          |          |   |
|----------|-----------|---|-------|----------|--------|----------|---|-----------|----------|----------|---|
| 57117003 |           | 0 | 0     | 0.08305  | 49.2   | 2.71E-05 | 2 | 1458.7792 | -1.37711 | 19.73507 | 1 |
| 57117003 |           | 0 | 0     | 0.2217   | 47.77  | 1.67E-05 | 2 | 969.50005 | 0.006497 | 20.1865  | 0 |
| 57117003 | N-Term(A  | 0 | 0.002 | 0.2442   | 30.73  | 0.001014 | 2 | 1833.0163 | 2.48042  | 30.66384 | 0 |
| 15610564 | M18(Oxid  | 0 | 0     | 4.38E-05 | 104.18 | 8.4E-11  | 2 | 2100.0508 | -1.6797  | 31.86138 | 0 |
| 15610564 |           | 0 | 0     | 0.000215 | 103.5  | 8.71E-11 | 2 | 1863.9236 | 0.010882 | 37.12489 | 0 |
| 15610564 |           | 0 | 0     | 0.000896 | 89.22  | 1.97E-09 | 2 | 2084.0591 | -0.14955 | 36.26905 | 0 |
| 15610564 |           | 0 | 0     | 0.000504 | 88.25  | 2.99E-09 | 2 | 2069.0762 | -0.63402 | 33.01388 | 0 |
| 15610564 | M1(Oxidat | 0 | 0     | 0.001095 | 77.02  | 3.87E-08 | 2 | 1828.9635 | 0.471456 | 33.82723 | 0 |
| 15610564 | M8(Oxidat | 0 | 0     | 0.004925 | 76.57  | 2.31E-08 | 3 | 2554.2204 | -1.56025 | 40.79965 | 0 |
| 15610564 | M10(Oxid  | 0 | 0     | 0.00575  | 70.07  | 1.77E-07 | 3 | 2767.3471 | 0.048332 | 36.2522  | 1 |
| 15610564 |           | 0 | 0     | 0.01187  | 67.58  | 2.71E-07 | 2 | 900.52611 | -0.09071 | 26.47235 | 0 |
| 15610564 |           | 0 | 0     | 0.01202  | 66.66  | 4.1E-07  | 2 | 1730.8664 | -2.5887  | 24.57328 | 0 |
| 15610564 |           | 0 | 0     | 0.006639 | 63.11  | 1.1E-06  | 2 | 2061.0657 | 0.242655 | 37.07186 | 0 |
| 15610564 | N-Term(A  | 0 | 0     | 0.01117  | 62.19  | 1.18E-06 | 2 | 1905.9338 | -0.21663 | 37.23555 | 0 |
| 15610564 |           | 0 | 0     | 0.005678 | 59.21  | 2.52E-06 | 2 | 1812.9681 | 0.162097 | 37.11984 | 0 |
| 15610564 |           | 0 | 0     | 0.01985  | 59.04  | 1.24E-06 | 2 | 954.53636 | -0.41673 | 20.84433 | 0 |
| 15610564 |           | 0 | 0     | 0.06345  | 56.86  | 5.56E-06 | 2 | 975.5114  | -0.53425 | 14.36929 | 0 |
| 15610564 |           | 0 | 0     | 0.03486  | 55.6   | 2.75E-06 | 2 | 1307.59   | -0.21251 | 20.38223 | 0 |
| 15610564 |           | 0 | 0     | 0.01631  | 53.09  | 1.08E-05 | 3 | 1150.6021 | -1.42997 | 18.94985 | 0 |
| 15610564 |           | 0 | 0     | 0.04485  | 48.65  | 1.91E-05 | 2 | 1106.5477 | -0.05086 | 23.4445  | 0 |
| 15610564 |           | 0 | 0     | 0.01074  | 42.9   | 6.41E-05 | 3 | 2538.23   | 0.201828 | 45.42094 | 0 |
| 15610564 | M5(Oxidat | 0 | 0     | 0.04412  | 41.23  | 0.000136 | 3 | 1166.5987 | -0.00756 | 17.21787 | 0 |
| 15610564 |           | 0 | 0     | 0.1699   | 36.32  | 0.000455 | 2 | 991.53594 | -0.07567 | 30.24325 | 0 |
| 15610564 | N-Term(A  | 0 | 0     | 0.09101  | 35.59  | 0.000621 | 2 | 942.53551 | -1.32332 | 29.91296 | 0 |
| 15610564 |           | 0 | 0     | 0.109    | 34.75  | 0.00062  | 2 | 1386.7842 | -0.75283 | 25.21263 | 1 |
| 15610564 | C3(Carban | 0 | 0     | 0.1592   | 34.04  | 0.000828 | 2 | 889.4558  | -0.29028 | 18.27304 | 0 |
| 15610564 |           | 0 | 0     | 0.03915  | 33.77  | 0.001259 | 3 | 2091.0606 | -0.60748 | 31.13414 | 1 |
| 15610564 | C5(Carban | 0 | 0     | 0.1133   | 33.76  | 0.00042  | 2 | 820.37694 | -0.15311 | 18.46567 | 0 |
| 15610564 | C3(Carban | 0 | 0     | 0.05049  | 27.97  | 0.001592 | 2 | 1415.6249 | -1.28832 | 14.98828 | 1 |
| 15610564 | M10(Oxid  | 0 | 0     | 0.04112  | 26.49  | 0.004039 | 3 | 2764.4813 | -0.11212 | 39.87122 | 1 |
| 15610564 | C5(Carban | 0 | 0.002 | 0.2195   | 36.71  | 0.000363 | 2 | 790.38671 | -1.18927 | 13.41452 | 0 |
| 15610564 |           | 0 | 0.002 | 0.2025   | 35.13  | 0.000306 | 2 | 895.442   | -0.13193 | 25.23723 | 1 |
| 15610564 |           | 0 | 0.002 | 0.1861   | 31.7   | 0.002569 | 2 | 774.40764 | -0.44024 | 21.1311  | 0 |
| 15610564 | C5(Carban | 0 | 0.002 | 0.272    | 20.2   | 0.009527 | 3 | 1658.748  | -0.39144 | 15.00044 | 2 |
| 15610564 | N-Term(A  | 0 | 0.002 | 0.2528   | 20.03  | 0.022345 | 3 | 1772.8908 | 5.311076 | 27.16384 | 0 |
| 15610564 | N-Term(A  | 0 | 0.005 | 0.3511   | 12.73  | 0.053207 | 3 | 2120.9934 | 3.521944 | 25.95901 | 1 |

|          |           |   |   |          |        |          |   |           |          |          |   |
|----------|-----------|---|---|----------|--------|----------|---|-----------|----------|----------|---|
| 15609421 | M4(Oxidat | 0 | 0 | 3.91E-12 | 78.92  | 1.6E-08  | 3 | 3158.5338 | -0.8674  | 47.35147 | 0 |
| 15609421 |           | 0 | 0 | 5.77E-16 | 75.89  | 2.57E-08 | 2 | 1717.7112 | 1.349435 | 22.5924  | 0 |
| 15609421 |           | 0 | 0 | 9.41E-11 | 73.79  | 4.17E-08 | 2 | 1296.5865 | 0.695735 | 23.77552 | 0 |
| 15609421 |           | 0 | 0 | 5.77E-16 | 72.34  | 1.08E-07 | 2 | 1226.6503 | 1.210494 | 22.12133 | 0 |
| 15609421 |           | 0 | 0 | 5.77E-16 | 70.4   | 2.14E-07 | 4 | 2901.5314 | 1.902952 | 38.79304 | 1 |
| 15609421 |           | 0 | 0 | 5.1E-09  | 70.08  | 9.79E-08 | 3 | 2149.9506 | -3.17478 | 24.95788 | 1 |
| 15609421 |           | 0 | 0 | 5.77E-16 | 68.99  | 2.52E-07 | 2 | 1732.8705 | 0.657693 | 38.31426 | 0 |
| 15609421 |           | 0 | 0 | 5.77E-16 | 68.23  | 2.41E-07 | 3 | 3142.5406 | -0.31464 | 38.82963 | 0 |
| 15609421 | M7(Oxidat | 0 | 0 | 5.77E-16 | 67.01  | 3.98E-07 | 2 | 2652.3248 | 2.746394 | 37.85675 | 0 |
| 15609421 |           | 0 | 0 | 5.77E-16 | 65.39  | 4.63E-07 | 3 | 2881.5357 | 1.258837 | 37.78848 | 1 |
| 15609421 |           | 0 | 0 | 4.18E-08 | 63.5   | 8.04E-07 | 2 | 861.45683 | -1.08722 | 24.31991 | 0 |
| 15609421 | C17(Carba | 0 | 0 | 1.32E-09 | 63.13  | 1.02E-06 | 3 | 2636.3192 | -1.27766 | 39.9586  | 0 |
| 15609421 |           | 0 | 0 | 3.05E-11 | 62.06  | 1.21E-06 | 3 | 2725.4341 | 1.146184 | 38.95595 | 0 |
| 15609421 | M5(Oxidat | 0 | 0 | 0.000517 | 61.85  | 1.08E-06 | 2 | 1826.8963 | 0.00905  | 31.73334 | 0 |
| 15609421 |           | 0 | 0 | 0.07859  | 57.19  | 4.68E-06 | 3 | 2459.274  | 0.849289 | 40.66392 | 0 |
| 15609421 |           | 0 | 0 | 2.29E-11 | 56.16  | 6.29E-06 | 2 | 1337.6827 | -1.65698 | 28.75079 | 0 |
| 15609421 |           | 0 | 0 | 4.97E-05 | 55.05  | 6.56E-06 | 3 | 1794.9054 | -0.56362 | 35.63315 | 0 |
| 15609421 | M8(Oxidat | 0 | 0 | 4.52E-05 | 54.77  | 6.67E-06 | 2 | 1810.9001 | -0.7092  | 33.24434 | 0 |
| 15609421 |           | 0 | 0 | 5.52E-06 | 52.75  | 1.09E-05 | 2 | 1493.7839 | -1.43275 | 25.72867 | 1 |
| 15609421 |           | 0 | 0 | 3.68E-06 | 52.71  | 8.57E-06 | 3 | 3564.7364 | 0.250232 | 34.93313 | 0 |
| 15609421 |           | 0 | 0 | 1.05E-05 | 42.64  | 7.62E-05 | 2 | 1024.5322 | -0.17492 | 24.77263 | 0 |
| 15609421 |           | 0 | 0 | 0.02217  | 35.1   | 0.000525 | 2 | 1017.558  | -0.84546 | 20.49714 | 1 |
| 15609421 | M5(Oxidat | 0 | 0 | 1.13E-05 | 34.52  | 0.000636 | 3 | 1842.8906 | -0.31916 | 28.95424 | 0 |
| 15609421 | N-Term(A  | 0 | 0 | 4.41E-07 | 34.13  | 0.000695 | 2 | 1268.6619 | 1.983612 | 23.1805  | 0 |
| 15609421 | N-Term(A  | 0 | 0 | 4.92E-07 | 27.9   | 0.00373  | 4 | 3200.5626 | 4.858982 | 36.71868 | 0 |
| 15609421 |           | 0 | 0 | 0.1444   | 23.27  | 0.004699 | 3 | 1435.8145 | 1.076365 | 17.43463 | 1 |
| 15610011 |           | 0 | 0 | 0.01989  | 103.37 | 4.59E-11 | 2 | 1895.8764 | -0.36444 | 28.85971 | 0 |
| 15610011 |           | 0 | 0 | 0.05339  | 97.95  | 2.97E-10 | 2 | 1610.8393 | 0.49024  | 24.43467 | 0 |
| 15610011 |           | 0 | 0 | 0.006125 | 90.53  | 1.42E-09 | 2 | 1599.7657 | 0.425874 | 30.22951 | 0 |
| 15610011 |           | 0 | 0 | 0.03581  | 86.27  | 4.37E-09 | 2 | 1754.8752 | 0.170023 | 41.51343 | 0 |
| 15610011 |           | 0 | 0 | 0.05902  | 80.03  | 3.28E-08 | 2 | 1329.7378 | 0.390504 | 20.07783 | 0 |
| 15610011 |           | 0 | 0 | 0.04592  | 78.99  | 3.34E-08 | 2 | 1978.0016 | -0.66066 | 28.85593 | 1 |
| 15610011 |           | 0 | 0 | 0.07686  | 74.61  | 9.34E-08 | 2 | 1353.7034 | -1.1336  | 30.92516 | 0 |
| 15610011 |           | 0 | 0 | 0.01636  | 72.69  | 1.13E-07 | 3 | 2362.2506 | -0.37584 | 26.28728 | 0 |
| 15610011 |           | 0 | 0 | 0.05209  | 72.42  | 1.2E-07  | 2 | 2025.0179 | -0.51922 | 36.39528 | 1 |
| 15610011 |           | 0 | 0 | 0.08426  | 69.33  | 1.98E-07 | 2 | 2658.2913 | -1.30307 | 38.06651 | 0 |



|          |           |   |   |          |        |          |   |           |          |          |   |
|----------|-----------|---|---|----------|--------|----------|---|-----------|----------|----------|---|
| 15610011 |           | 0 | 0 | 0.08595  | 59.38  | 2.08E-06 | 2 | 1531.8057 | 0.039405 | 29.60823 | 0 |
| 15610011 |           | 0 | 0 | 0.2109   | 48.74  | 1.54E-05 | 2 | 3164.4966 | 0.166955 | 38.48186 | 0 |
| 15610011 | N-Term(A) | 0 | 0 | 0.05571  | 45.66  | 6.11E-05 | 2 | 2020.0207 | 3.550054 | 30.34773 | 1 |
| 15610011 |           | 0 | 0 | 0.1071   | 38.93  | 0.000217 | 3 | 1932.9724 | 1.135537 | 32.43154 | 0 |
| 15610011 |           | 0 | 0 | 0.2389   | 36.54  | 0.000455 | 2 | 1182.6841 | -0.02678 | 18.92538 | 0 |
| 15610011 |           | 0 | 0 | 0.1518   | 34.37  | 0.000365 | 3 | 2109.0014 | 0.837676 | 26.87416 | 1 |
| 15610375 |           | 0 | 0 | 0.002722 | 106.03 | 4.86E-11 | 2 | 1056.6164 | 0.273805 | 30.11034 | 0 |
| 15610375 |           | 0 | 0 | 0.001855 | 105.91 | 2.95E-11 | 2 | 1551.8748 | 0.400907 | 44.25567 | 0 |
| 15610375 |           | 0 | 0 | 0.005822 | 88.06  | 1.56E-09 | 2 | 1696.9955 | -0.08857 | 33.02052 | 1 |
| 15610375 | N-Term(A) | 0 | 0 | 0.00928  | 86.88  | 5.85E-09 | 2 | 1098.6276 | 0.869062 | 34.75748 | 0 |
| 15610375 |           | 0 | 0 | 0.00894  | 84.65  | 3.77E-09 | 3 | 4138.2231 | -3.99535 | 49.60313 | 1 |
| 15610375 |           | 0 | 0 | 0.00608  | 82.98  | 1.11E-08 | 2 | 1768.9191 | -2.15178 | 33.05719 | 0 |
| 15610375 |           | 0 | 0 | 0.01117  | 80.3   | 1.87E-08 | 2 | 1197.6584 | -0.26594 | 28.74317 | 0 |
| 15610375 |           | 0 | 0 | 0.009336 | 77.63  | 3.19E-08 | 2 | 1835.9773 | 0.53444  | 27.01131 | 1 |
| 15610375 |           | 0 | 0 | 0.02462  | 76.4   | 2.86E-08 | 2 | 1420.7894 | -0.99738 | 25.009   | 0 |
| 15610375 |           | 0 | 0 | 0.01215  | 73.46  | 7.66E-08 | 2 | 1455.7596 | 0.300725 | 36.25515 | 0 |
| 15610375 | M5(Oxidat | 0 | 0 | 0.03081  | 72.24  | 1.73E-07 | 2 | 1603.8288 | 1.619032 | 25.19727 | 0 |
| 15610375 |           | 0 | 0 | 0.03115  | 69.31  | 1.17E-07 | 2 | 2007.123  | -0.23362 | 40.04452 | 1 |
| 15610375 |           | 0 | 0 | 0.06784  | 67.02  | 4.87E-07 | 2 | 1327.7117 | -0.04051 | 26.87563 | 1 |
| 15610375 |           | 0 | 0 | 0.01386  | 66.97  | 2.11E-07 | 3 | 1241.7455 | -0.70323 | 29.99625 | 0 |
| 15610375 |           | 0 | 0 | 0.03351  | 65.81  | 6.17E-07 | 2 | 1587.8306 | -0.41396 | 26.31422 | 0 |
| 15610375 |           | 0 | 0 | 0.04168  | 63.55  | 9.71E-07 | 2 | 1171.6111 | 0.409934 | 32.76646 | 0 |
| 15610375 | M8(Oxidat | 0 | 0 | 0.01389  | 62.04  | 1.59E-06 | 3 | 1975.0197 | 0.896787 | 24.52717 | 1 |
| 15610375 |           | 0 | 0 | 0.02233  | 61.88  | 1.78E-06 | 3 | 1959.0176 | -2.78204 | 25.04042 | 1 |
| 15610375 | N-Term(A) | 0 | 0 | 0.03175  | 60.43  | 1.31E-06 | 2 | 1462.7997 | -1.09795 | 33.93633 | 0 |
| 15610375 |           | 0 | 0 | 0.03988  | 59.82  | 1.04E-06 | 2 | 996.5363  | -1.0926  | 16.74317 | 0 |
| 15610375 |           | 0 | 0 | 0.02721  | 58.31  | 2.36E-06 | 2 | 1424.7953 | -1.11989 | 23.22801 | 1 |
| 15610375 |           | 0 | 0 | 0.05745  | 54.11  | 4.27E-06 | 3 | 2066.1599 | -0.32237 | 38.79322 | 1 |
| 15610375 | N-Term(A) | 0 | 0 | 0.07886  | 53.94  | 4.04E-06 | 2 | 1593.8833 | -0.87705 | 49.03861 | 0 |
| 15610375 | N-Term(A) | 0 | 0 | 0.07338  | 52.69  | 8.88E-06 | 3 | 1497.7802 | 7.003177 | 34.18537 | 0 |
| 15610375 |           | 0 | 0 | 0.04106  | 49.66  | 1.68E-05 | 3 | 1422.749  | 0.045501 | 25.81966 | 0 |
| 15610375 |           | 0 | 0 | 0.09703  | 48.19  | 3.34E-05 | 4 | 1619.8628 | 0.921297 | 21.5473  | 1 |
| 15610375 | N-Term(A) | 0 | 0 | 0.104    | 44.75  | 4.02E-05 | 2 | 1038.5466 | -1.34795 | 18.54383 | 0 |
| 15610375 |           | 0 | 0 | 0.1161   | 44.65  | 3.42E-05 | 2 | 1407.8512 | -2.22141 | 21.99228 | 1 |
| 15610375 |           | 0 | 0 | 0.1681   | 42     | 6.29E-05 | 3 | 1251.753  | -0.20527 | 26.43499 | 0 |
| 15610375 |           | 0 | 0 | 0.0309   | 40.29  | 0.000131 | 3 | 1862.0248 | 0.199831 | 24.6898  | 1 |

|          |           |   |       |          |        |          |   |           |          |          |   |
|----------|-----------|---|-------|----------|--------|----------|---|-----------|----------|----------|---|
| 15610375 | N-Term(A  | 0 | 0     | 0.1522   | 35.79  | 0.000738 | 3 | 2017.0261 | -1.1825  | 25.87977 | 1 |
| 15610375 | C20(Carba | 0 | 0     | 0.1146   | 34.42  | 0.001211 | 3 | 2527.2856 | -0.79876 | 32.04911 | 2 |
| 15610375 |           | 0 | 0     | 0.1093   | 26.22  | 0.002382 | 5 | 3869.0623 | 2.032238 | 49.17688 | 0 |
| 15610375 | C16(Carba | 0 | 0.003 | 0.2738   | 37.32  | 0.000408 | 2 | 2114.0655 | 2.536339 | 32.06715 | 1 |
| 15610375 | N-Term(A  | 0 | 0.003 | 0.2716   | 35.43  | 0.000559 | 2 | 1877.996  | 4.841852 | 30.37295 | 1 |
| 15610375 | N-Term(A  | 0 | 0.009 | 0.3619   | 10.5   | 0.200531 | 3 | 2569.2839 | -5.53914 | 34.68682 | 2 |
| 15610079 |           | 0 | 0     | 5.25E-16 | 127.86 | 1.63E-13 | 2 | 1893.8665 | -3.25716 | 38.34806 | 0 |
| 15610079 |           | 0 | 0     | 3.94E-13 | 121.31 | 1.41E-12 | 2 | 1723.9028 | 0.763535 | 49.65224 | 0 |
| 15610079 |           | 0 | 0     | 5.25E-16 | 117.65 | 3.35E-12 | 2 | 1720.8886 | -0.75188 | 29.96605 | 0 |
| 15610079 |           | 0 | 0     | 6.19E-16 | 113.1  | 1.18E-11 | 3 | 2575.3066 | 1.2707   | 44.11329 | 0 |
| 15610079 | M9(Oxidat | 0 | 0     | 5.25E-16 | 109.13 | 2.2E-11  | 2 | 1736.8859 | 0.636517 | 34.2406  | 0 |
| 15610079 | M6(Oxidat | 0 | 0     | 5.25E-16 | 94.46  | 7.52E-10 | 2 | 2591.2974 | -0.32625 | 35.14857 | 0 |
| 15610079 |           | 0 | 0     | 5.25E-16 | 90.04  | 1.93E-09 | 2 | 2279.1216 | -0.38246 | 42.42859 | 0 |
| 15610079 |           | 0 | 0     | 5.25E-16 | 84.73  | 5.72E-09 | 2 | 2014.0954 | -0.73819 | 33.30739 | 0 |
| 15610079 |           | 0 | 0     | 5.34E-08 | 84.28  | 3.73E-09 | 2 | 1875.0684 | -0.81294 | 34.5263  | 0 |
| 15610079 |           | 0 | 0     | 5.25E-16 | 82.88  | 5.14E-09 | 2 | 1288.5491 | 1.279396 | 26.5753  | 0 |
| 15610079 |           | 0 | 0     | 5.25E-16 | 80.58  | 1.36E-08 | 2 | 1504.823  | -0.05027 | 29.01113 | 0 |
| 15610079 |           | 0 | 0     | 5.25E-16 | 78.08  | 3.5E-08  | 2 | 2414.2093 | -0.31281 | 33.28615 | 1 |
| 15610079 | M13(Oxid  | 0 | 0     | 9.85E-16 | 75.84  | 5.86E-08 | 3 | 2423.2234 | 4.554481 | 33.05891 | 1 |
| 15610079 | N-Term(A  | 0 | 0     | 6.39E-16 | 74.59  | 9.21E-08 | 2 | 2617.3138 | -0.05273 | 37.12168 | 0 |
| 15610079 | M9(Oxidat | 0 | 0     | 5.25E-16 | 72.46  | 1.11E-07 | 2 | 1591.7929 | 1.958784 | 29.56131 | 0 |
| 15610079 |           | 0 | 0     | 5.66E-16 | 72.02  | 1.19E-07 | 2 | 1575.7966 | 1.075702 | 32.73452 | 0 |
| 15610079 |           | 0 | 0     | 4.77E-07 | 71.25  | 1.76E-07 | 2 | 2407.2168 | -0.26039 | 39.61048 | 1 |
| 15610079 |           | 0 | 0     | 3.34E-13 | 69.19  | 1.99E-07 | 3 | 1889.0379 | 1.416427 | 30.73016 | 1 |
| 15610079 | M3(Oxidat | 0 | 0     | 5.25E-16 | 68.01  | 1.58E-07 | 2 | 1304.5409 | -1.10778 | 19.37615 | 0 |
| 15610079 |           | 0 | 0     | 0.001637 | 67.52  | 3.54E-07 | 2 | 1028.5743 | 0.704907 | 19.82543 | 0 |
| 15610079 | M12(Oxid  | 0 | 0     | 1.28E-12 | 60.34  | 1.43E-06 | 3 | 2295.1195 | 0.925742 | 35.97271 | 0 |
| 15610079 | M6(Oxidat | 0 | 0     | 3.84E-12 | 57.37  | 1.83E-06 | 3 | 1696.7688 | -1.21664 | 15.60698 | 1 |
| 15610079 |           | 0 | 0     | 6.41E-12 | 53.83  | 4.13E-06 | 2 | 868.52544 | 0.353385 | 23.58399 | 0 |
| 15610079 |           | 0 | 0     | 0.03198  | 53.8   | 4.16E-06 | 3 | 1680.7752 | -0.40435 | 19.06757 | 1 |
| 15610079 |           | 0 | 0     | 3.06E-12 | 53.09  | 4.9E-06  | 3 | 2189.2373 | -1.30751 | 32.24663 | 1 |
| 15610079 |           | 0 | 0     | 1.7E-13  | 52.35  | 1.43E-05 | 3 | 2160.1102 | 2.861571 | 37.28465 | 0 |
| 15610079 |           | 0 | 0     | 1.1E-13  | 51.88  | 7.78E-06 | 2 | 1302.7553 | 1.830983 | 25.20796 | 1 |
| 15610079 |           | 0 | 0     | 1.86E-09 | 46.57  | 2.2E-05  | 4 | 2738.5414 | -0.41948 | 37.93014 | 2 |
| 15610079 | N-Term(A  | 0 | 0     | 5.04E-10 | 44.57  | 0.000119 | 2 | 786.44658 | -0.36302 | 23.38903 | 0 |
| 15610079 |           | 0 | 0     | 2.58E-11 | 44.23  | 6.42E-05 | 2 | 1064.5345 | -2.50802 | 19.79732 | 1 |

|          |           |   |   |          |        |          |   |           |          |          |   |
|----------|-----------|---|---|----------|--------|----------|---|-----------|----------|----------|---|
| 15610079 | N-Term(A  | 0 | 0 | 0.002565 | 41.08  | 0.000203 | 2 | 2449.2303 | 0.912902 | 42.00775 | 1 |
| 15610079 |           | 0 | 0 | 2.07E-07 | 33.07  | 0.001356 | 2 | 1460.7829 | 0.234951 | 25.42113 | 1 |
| 15610079 | N-Term(A  | 0 | 0 | 3.59E-06 | 29.33  | 0.001984 | 3 | 1931.0476 | 0.940046 | 34.10062 | 1 |
| 15610079 |           | 0 | 0 | 2.44E-06 | 22.38  | 0.00925  | 2 | 936.44176 | -0.44026 | 20.42108 | 0 |
| 15609724 |           | 0 | 0 | 0.000176 | 116.77 | 4.31E-12 | 2 | 1589.7923 | 0.246967 | 28.20512 | 0 |
| 15609724 |           | 0 | 0 | 0.001002 | 101.24 | 1.17E-10 | 2 | 2145.0311 | 4.383227 | 41.82276 | 0 |
| 15609724 |           | 0 | 0 | 0.002695 | 98.09  | 3.1E-10  | 2 | 1398.7704 | 0.294574 | 44.29473 | 0 |
| 15609724 |           | 0 | 0 | 2.83E-06 | 78.06  | 2.89E-08 | 2 | 2650.3174 | 1.21084  | 36.12045 | 0 |
| 15609724 | M9(Oxidat | 0 | 0 | 0.001828 | 74.91  | 5E-08    | 2 | 2161.0228 | 2.862708 | 33.8314  | 0 |
| 15609724 | M7(Oxidat | 0 | 0 | 0.002202 | 71.33  | 7.34E-08 | 3 | 2177.0154 | 1.806929 | 33.15566 | 0 |
| 15609724 |           | 0 | 0 | 0.001134 | 68.24  | 3E-07    | 2 | 1029.5689 | 0.100969 | 26.38422 | 0 |
| 15609724 |           | 0 | 0 | 0.04557  | 64.03  | 7.31E-07 | 3 | 2267.1749 | 0.413984 | 32.4188  | 1 |
| 15609724 | N-Term(A  | 0 | 0 | 0.02417  | 63.19  | 6E-07    | 3 | 2203.0268 | -0.13741 | 35.14243 | 0 |
| 15609724 | M22(Oxid: | 0 | 0 | 1.75E-05 | 60.57  | 1.58E-06 | 2 | 2666.3089 | -0.09407 | 34.81369 | 0 |
| 15609724 |           | 0 | 0 | 0.000674 | 58.08  | 2.1E-06  | 2 | 1238.6767 | -1.06401 | 49.36943 | 0 |
| 15609724 | N-Term(A  | 0 | 0 | 0.003088 | 54.57  | 5.06E-06 | 2 | 1631.8029 | 0.274386 | 26.39186 | 0 |
| 15609724 | C6(Carban | 0 | 0 | 0.001418 | 49.92  | 1.83E-05 | 2 | 1270.6451 | -0.76982 | 21.15855 | 0 |
| 15609724 |           | 0 | 0 | 0.00534  | 40.28  | 0.000295 | 2 | 759.4099  | -1.20176 | 12.45028 | 0 |
| 15609724 |           | 0 | 0 | 0.02935  | 39.81  | 0.000198 | 2 | 785.48772 | -0.36003 | 22.43177 | 0 |
| 15609724 |           | 0 | 0 | 0.07447  | 37.94  | 0.000442 | 3 | 1528.8091 | 0.77436  | 18.55473 | 1 |
| 15609724 |           | 0 | 0 | 0.3203   | 35.71  | 0.000309 | 3 | 4223.1031 | -3.00224 | 39.69751 | 0 |
| 15609724 | N-Term(A  | 0 | 0 | 0.1143   | 35.21  | 0.000301 | 3 | 2187.0243 | -3.60771 | 33.86614 | 0 |
| 15609724 |           | 0 | 0 | 0.000763 | 25.41  | 0.006906 | 2 | 3025.5025 | -1.63355 | 34.47231 | 0 |
| 15609476 |           | 0 | 0 | 0.001452 | 136.52 | 3.68E-14 | 2 | 1908.9543 | -0.38244 | 38.97441 | 0 |
| 15609476 |           | 0 | 0 | 0.001763 | 124.57 | 8.55E-13 | 2 | 1541.7961 | 0.121162 | 28.21692 | 0 |
| 15609476 | M14(Oxid: | 0 | 0 | 0.002675 | 110.01 | 9.95E-12 | 2 | 1823.7975 | 0.102342 | 31.90464 | 0 |
| 15609476 | M1(Oxidat | 0 | 0 | 0.004775 | 100.59 | 8.71E-11 | 2 | 1839.7878 | -2.44266 | 28.42477 | 0 |
| 15609476 |           | 0 | 0 | 0.0166   | 91.67  | 6.79E-10 | 2 | 1807.8029 | 0.261502 | 32.81228 | 0 |
| 15609476 | M1(Oxidat | 0 | 0 | 0.01319  | 88.39  | 1.45E-09 | 2 | 1855.7878 | 0.318477 | 26.59454 | 0 |
| 15609476 |           | 0 | 0 | 0.01362  | 81.2   | 7.97E-09 | 2 | 1859.8749 | -1.15909 | 22.96368 | 0 |
| 15609476 |           | 0 | 0 | 0.06403  | 80.86  | 1.23E-08 | 2 | 1388.6807 | -0.83507 | 17.51598 | 1 |
| 15609476 |           | 0 | 0 | 0.04917  | 67.95  | 4.25E-07 | 2 | 1681.8666 | 0.531224 | 28.29565 | 0 |
| 15609476 |           | 0 | 0 | 0.06033  | 64.96  | 9.42E-07 | 2 | 1057.5723 | 1.136493 | 26.35904 | 0 |
| 15609476 |           | 0 | 0 | 0.0376   | 61.98  | 1.9E-06  | 3 | 2442.2278 | 0.694047 | 29.37812 | 1 |
| 15609476 | M5(Oxidat | 0 | 0 | 0.06102  | 61.51  | 2.05E-06 | 2 | 1073.5652 | -0.7388  | 22.28467 | 0 |
| 15609476 |           | 0 | 0 | 0.05453  | 57.8   | 4.31E-06 | 2 | 2246.1983 | -0.69518 | 47.95267 | 0 |

|          |           |   |   |          |       |          |   |           |          |          |   |
|----------|-----------|---|---|----------|-------|----------|---|-----------|----------|----------|---|
| 15609476 |           | 0 | 0 | 0.069    | 57.26 | 5.17E-06 | 2 | 2440.2583 | 0.129937 | 32.89755 | 1 |
| 15609476 |           | 0 | 0 | 0.1281   | 53.27 | 4.7E-06  | 2 | 883.41985 | -0.04969 | 26.41466 | 0 |
| 15609476 | C9(Carban | 0 | 0 | 0.04569  | 50.61 | 8.67E-06 | 2 | 2489.0809 | 0.260677 | 33.38267 | 0 |
| 15609476 |           | 0 | 0 | 0.03191  | 48.22 | 1.5E-05  | 3 | 2955.2862 | -1.93698 | 33.01062 | 0 |
| 15609476 |           | 0 | 0 | 0.1751   | 46.45 | 5.55E-05 | 2 | 1147.6325 | 0.62092  | 20.56486 | 1 |
| 15609476 |           | 0 | 0 | 0.1422   | 44.55 | 4.38E-05 | 3 | 3987.0172 | 1.463182 | 39.53527 | 0 |
| 15609476 |           | 0 | 0 | 0.1524   | 43.39 | 6.64E-05 | 2 | 1124.605  | -0.77648 | 23.69752 | 0 |
| 15609476 | M3(Oxidat | 0 | 0 | 0.1624   | 40.41 | 9.08E-05 | 2 | 899.41454 | -0.29903 | 23.31777 | 0 |
| 15609476 |           | 0 | 0 | 0.2527   | 35.74 | 0.00044  | 2 | 1309.7002 | -0.71649 | 20.45677 | 1 |
| 15609476 | N-Term(A  | 0 | 0 | 0.1308   | 35.7  | 0.000458 | 2 | 1950.9606 | -2.53589 | 45.36044 | 0 |
| 15609476 | M2(Oxidat | 0 | 0 | 0.3101   | 34.08 | 0.00039  | 2 | 915.41448 | 5.194379 | 18.01016 | 0 |
| 15609476 |           | 0 | 0 | 0.1667   | 32.14 | 0.000609 | 3 | 1436.8243 | 1.54655  | 24.3586  | 1 |
| 15609476 | M24(Oxid: | 0 | 0 | 0.1753   | 30.37 | 0.001928 | 5 | 4003.0061 | -0.03885 | 37.3431  | 0 |
| 15609476 | N-Term(A  | 0 | 0 | 0.3766   | 29.39 | 0.001148 | 2 | 941.42577 | 0.421184 | 28.37971 | 0 |
| 15609476 | M24(Oxid: | 0 | 0 | 0.2303   | 24.1  | 0.009726 | 4 | 4018.9967 | -1.10886 | 35.43132 | 0 |
| 15609476 | M23(Oxid: | 0 | 0 | 0.3736   | 22.01 | 0.010072 | 4 | 4034.9984 | 0.579304 | 33.5914  | 0 |
| 15609476 |           | 0 | 0 | 0.3519   | 14.89 | 0.082707 | 2 | 1418.7138 | 0.156068 | 15.79503 | 1 |
| 15610929 |           | 0 | 0 | 4.79E-16 | 90.18 | 1.44E-09 | 3 | 2683.3009 | 1.526542 | 39.90691 | 0 |
| 15610929 |           | 0 | 0 | 1.61E-12 | 79.5  | 1.12E-08 | 2 | 1067.6567 | -0.52216 | 27.49291 | 0 |
| 15610929 | M18(Oxid: | 0 | 0 | 5.83E-16 | 73.12 | 4.86E-08 | 3 | 3153.4244 | 0.344164 | 30.00972 | 0 |
| 15610929 |           | 0 | 0 | 4.79E-16 | 71.73 | 1.71E-07 | 2 | 2205.1165 | -0.99706 | 32.84216 | 0 |
| 15610929 |           | 0 | 0 | 8.93E-15 | 68.73 | 1.54E-07 | 2 | 1411.7908 | 0.281758 | 26.11813 | 0 |
| 15610929 |           | 0 | 0 | 1.94E-11 | 65.94 | 4.07E-07 | 2 | 1338.7837 | -1.15948 | 28.08704 | 1 |
| 15610929 |           | 0 | 0 | 4.79E-16 | 65.04 | 3.13E-07 | 3 | 3137.4254 | -0.96357 | 31.87196 | 0 |
| 15610929 |           | 0 | 0 | 4.79E-16 | 65    | 7.75E-07 | 2 | 1672.8323 | -0.41146 | 34.72388 | 1 |
| 15610929 |           | 0 | 0 | 4.79E-16 | 62.37 | 1.01E-06 | 2 | 2256.178  | 0.343419 | 34.65735 | 0 |
| 15610929 |           | 0 | 0 | 3.07E-08 | 60.35 | 1.29E-06 | 3 | 2622.4153 | 0.017167 | 35.23493 | 1 |
| 15610929 | M10(Oxid: | 0 | 0 | 4.44E-06 | 50.72 | 1.53E-05 | 3 | 2699.3033 | 4.260547 | 38.83414 | 0 |
| 15610929 |           | 0 | 0 | 7.55E-12 | 49.09 | 3.64E-05 | 2 | 1058.5617 | -1.19803 | 25.69731 | 0 |
| 15610929 |           | 0 | 0 | 1.83E-11 | 49.04 | 3.18E-05 | 2 | 901.50878 | -1.58143 | 19.63859 | 0 |
| 15610929 |           | 0 | 0 | 2.86E-09 | 47.82 | 1.65E-05 | 2 | 1795.0187 | 0.10198  | 27.90031 | 1 |
| 15610929 |           | 0 | 0 | 1.25E-07 | 45.32 | 6.32E-05 | 4 | 3277.6564 | 3.225316 | 39.4929  | 1 |
| 15610929 |           | 0 | 0 | 7.99E-13 | 44.62 | 7.25E-05 | 3 | 1285.7014 | 0.146094 | 24.94579 | 1 |
| 15610929 |           | 0 | 0 | 0.000176 | 41.58 | 0.000149 | 2 | 1041.587  | -0.45089 | 28.47908 | 0 |
| 15610929 |           | 0 | 0 | 1.24E-07 | 41.28 | 0.000175 | 2 | 845.42681 | 0.395198 | 24.73073 | 0 |
| 15610929 | M8(Oxidat | 0 | 0 | 0.001442 | 38.52 | 0.000359 | 2 | 1057.5824 | 0.093382 | 23.60266 | 0 |

|          |           |   |   |          |        |          |   |           |          |          |   |
|----------|-----------|---|---|----------|--------|----------|---|-----------|----------|----------|---|
| 15610929 |           | 0 | 0 | 2.44E-07 | 38.28  | 0.000438 | 2 | 915.50463 | -0.10493 | 29.51641 | 0 |
| 15610929 |           | 0 | 0 | 0.000312 | 36.65  | 0.000368 | 2 | 1506.7442 | -0.44007 | 24.59763 | 1 |
| 15610929 |           | 0 | 0 | 0.02346  | 35.44  | 0.000285 | 2 | 953.53038 | 0.137144 | 24.06953 | 0 |
| 15610929 |           | 0 | 0 | 8.85E-07 | 32.2   | 0.001145 | 3 | 2499.2461 | 1.770761 | 38.76812 | 2 |
| 15610929 |           | 0 | 0 | 1.46E-05 | 30.06  | 0.001282 | 3 | 2177.2166 | 0.737925 | 26.64905 | 2 |
| 15610929 | N-Term(A  | 0 | 0 | 7.95E-09 | 21.13  | 0.013876 | 4 | 3335.6476 | -1.10851 | 37.73552 | 1 |
| 15610971 | C9(Carban | 0 | 0 | 0.002107 | 72.38  | 5.77E-08 | 3 | 1660.7964 | 0.262266 | 20.96168 | 0 |
| 15610971 |           | 0 | 0 | 0.0146   | 67.75  | 1.67E-07 | 2 | 1890.8783 | -1.08828 | 26.53818 | 0 |
| 15610971 | M1(Oxidat | 0 | 0 | 0.005933 | 65.96  | 3.04E-07 | 2 | 1407.7669 | 0.267801 | 28.97466 | 1 |
| 15610971 | M1(Oxidat | 0 | 0 | 0.005543 | 65.96  | 3.8E-07  | 2 | 2018.978  | -0.39001 | 28.13552 | 0 |
| 15610971 | M9(Oxidat | 0 | 0 | 0.01628  | 63.65  | 4.3E-07  | 2 | 1212.5572 | 0.486744 | 24.45022 | 0 |
| 15610971 | C4(Carban | 0 | 0 | 0.001772 | 62.02  | 1.29E-06 | 3 | 2159.0909 | 2.736876 | 27.95203 | 1 |
| 15610971 |           | 0 | 0 | 0.01737  | 61.35  | 1.47E-06 | 2 | 1122.5861 | -0.27092 | 27.62649 | 0 |
| 15610971 | M5(Oxidat | 0 | 0 | 0.001899 | 61.33  | 7.34E-07 | 2 | 1906.8747 | -0.33296 | 39.30609 | 0 |
| 15610971 |           | 0 | 0 | 0.01762  | 59.16  | 1.21E-06 | 2 | 1196.5628 | 0.936382 | 28.33994 | 0 |
| 15610971 | C6(Carban | 0 | 0 | 0.01681  | 56.17  | 2.41E-06 | 3 | 2947.263  | -0.89563 | 30.94026 | 0 |
| 15610971 |           | 0 | 0 | 0.01399  | 55.99  | 3.65E-06 | 2 | 1789.8619 | -1.41759 | 31.93409 | 0 |
| 15610971 | M2(Oxidat | 0 | 0 | 0.002823 | 54.44  | 7.02E-06 | 3 | 2175.0807 | 0.396458 | 26.01473 | 1 |
| 15610971 | C19(Carba | 0 | 0 | 0.008801 | 49.01  | 1.25E-05 | 3 | 2393.1079 | -0.01756 | 30.07903 | 1 |
| 15610971 |           | 0 | 0 | 0.1595   | 45.77  | 2.91E-05 | 2 | 1391.7723 | 0.47644  | 30.59649 | 1 |
| 15610971 |           | 0 | 0 | 0.01787  | 45.34  | 4.82E-05 | 3 | 2279.2307 | 1.094994 | 41.64314 | 0 |
| 15610971 |           | 0 | 0 | 0.06216  | 44.87  | 4.07E-05 | 2 | 1322.6563 | 0.042565 | 38.633   | 0 |
| 15610971 |           | 0 | 0 | 0.1451   | 43.81  | 5.41E-05 | 2 | 821.42644 | -0.0269  | 17.93513 | 0 |
| 15610971 | M1(Oxidat | 0 | 0 | 0.08611  | 42.36  | 8.13E-05 | 2 | 1138.5812 | -0.08954 | 25.50447 | 0 |
| 15610971 |           | 0 | 0 | 0.06602  | 40.58  | 0.000153 | 2 | 2109.1375 | 1.658247 | 32.0515  | 0 |
| 15610971 | M5(Oxidat | 0 | 0 | 0.1089   | 37.85  | 0.000213 | 2 | 1338.6526 | 1.104984 | 36.21282 | 0 |
| 15610971 | C9(Carban | 0 | 0 | 0.1049   | 37.67  | 0.000325 | 4 | 1816.8969 | -0.1288  | 19.8572  | 1 |
| 15610971 | C6(Carban | 0 | 0 | 0.0904   | 35.78  | 0.000264 | 4 | 4140.8053 | 0.21717  | 34.34488 | 1 |
| 15610971 | C6(Carban | 0 | 0 | 0.0705   | 26.66  | 0.002153 | 4 | 4124.8292 | 4.785662 | 35.34625 | 1 |
| 15610971 | C6(Carban | 0 | 0 | 0.09     | 20.48  | 0.008932 | 4 | 4108.8117 | -0.71142 | 36.68723 | 1 |
| 15610971 | N-Term(A  | 0 | 0 | 0.2203   | 14.02  | 0.039534 | 2 | 1948.881  | -2.48977 | 27.05202 | 0 |
| 15608991 |           | 0 | 0 | 4.91E-07 | 108.09 | 1.55E-11 | 2 | 1402.806  | 0.423795 | 31.82945 | 0 |
| 15608991 |           | 0 | 0 | 2.79E-08 | 107.47 | 2.78E-11 | 2 | 3089.6338 | -2.62964 | 41.2373  | 0 |
| 15608991 |           | 0 | 0 | 5.46E-05 | 79.3   | 2.76E-08 | 2 | 1163.6061 | 0.47731  | 25.98194 | 0 |
| 15608991 |           | 0 | 0 | 5.87E-06 | 73.05  | 1.11E-07 | 2 | 1019.5267 | -0.19748 | 21.23154 | 0 |
| 15608991 |           | 0 | 0 | 0.008962 | 69.19  | 1.63E-07 | 2 | 1113.662  | -0.59838 | 29.5901  | 1 |

|          |           |   |   |          |        |          |   |           |          |          |   |
|----------|-----------|---|---|----------|--------|----------|---|-----------|----------|----------|---|
| 15608991 |           | 0 | 0 | 0.002003 | 64.84  | 4.59E-07 | 2 | 1098.5528 | -1.0007  | 17.25641 | 0 |
| 15608991 |           | 0 | 0 | 0.000126 | 63.6   | 1E-06    | 2 | 1031.5367 | -0.14794 | 30.64647 | 0 |
| 15608991 |           | 0 | 0 | 0.000829 | 59.74  | 1.06E-06 | 2 | 1675.983  | 0.785482 | 37.07104 | 0 |
| 15608991 | M14(Oxid: | 0 | 0 | 8.01E-05 | 56.07  | 2.47E-06 | 2 | 1691.9747 | -1.12255 | 33.86538 | 0 |
| 15608991 |           | 0 | 0 | 6.01E-06 | 54.56  | 8.57E-06 | 2 | 1376.7272 | -0.6834  | 25.1683  | 1 |
| 15608991 | C6(Carban | 0 | 0 | 0.000603 | 52.1   | 1.17E-05 | 3 | 1863.9485 | -0.55037 | 22.77864 | 2 |
| 15608991 | M1(Oxidat | 0 | 0 | 0.01916  | 41.77  | 7.65E-05 | 2 | 1482.6996 | -0.67022 | 15.93164 | 0 |
| 15608991 |           | 0 | 0 | 0.4654   | 40.64  | 0.000181 | 2 | 1144.6061 | -0.7379  | 15.66449 | 1 |
| 15608991 |           | 0 | 0 | 8.1E-06  | 23.9   | 0.005907 | 4 | 3863.0448 | 0.887696 | 45.8967  | 0 |
| 15610058 |           | 0 | 0 | 0.005184 | 103.51 | 4.45E-11 | 2 | 2344.0992 | -2.59059 | 29.96475 | 0 |
| 15610058 |           | 0 | 0 | 0.003659 | 89.39  | 1.15E-09 | 2 | 1645.772  | 0.916868 | 29.47482 | 0 |
| 15610058 |           | 0 | 0 | 0.03445  | 86.09  | 6.64E-09 | 2 | 1372.6958 | -0.73791 | 26.55506 | 0 |
| 15610058 |           | 0 | 0 | 0.01489  | 84.65  | 7.71E-09 | 2 | 1683.8558 | 0.510251 | 27.27278 | 0 |
| 15610058 |           | 0 | 0 | 0.04314  | 80.35  | 1.94E-08 | 3 | 3125.5785 | 1.059973 | 45.20429 | 1 |
| 15610058 |           | 0 | 0 | 0.01147  | 79.99  | 2.21E-08 | 2 | 1498.8249 | 1.598186 | 31.08324 | 0 |
| 15610058 |           | 0 | 0 | 0.2504   | 72.11  | 8.3E-08  | 2 | 3321.6255 | -0.60977 | 34.27357 | 0 |
| 15610058 |           | 0 | 0 | 0.05309  | 70.87  | 8.18E-08 | 3 | 4008.9448 | 0.622617 | 31.00173 | 1 |
| 15610058 | M11(Oxid: | 0 | 0 | 0.1688   | 69.18  | 1.75E-07 | 2 | 1515.7466 | -0.41344 | 28.21786 | 0 |
| 15610058 |           | 0 | 0 | 0.0734   | 68.69  | 1.83E-07 | 2 | 1048.5766 | -1.95085 | 25.41618 | 0 |
| 15610058 |           | 0 | 0 | 0.09828  | 67.21  | 1.9E-07  | 2 | 1096.6351 | -0.98842 | 21.99873 | 0 |
| 15610058 |           | 0 | 0 | 0.03216  | 66.43  | 3.64E-07 | 3 | 1547.8687 | 0.42975  | 35.44773 | 0 |
| 15610058 |           | 0 | 0 | 0.02951  | 62.5   | 7.03E-07 | 3 | 2870.391  | -0.22888 | 25.031   | 1 |
| 15610058 |           | 0 | 0 | 0.1138   | 55.86  | 4.02E-06 | 3 | 1204.6791 | -0.58193 | 23.79938 | 1 |
| 15610058 |           | 0 | 0 | 0.05119  | 53.53  | 8.65E-06 | 3 | 3477.7258 | -0.82758 | 33.15477 | 1 |
| 15610058 | M15(Oxid: | 0 | 0 | 0.1526   | 46.37  | 5.65E-05 | 2 | 1955.0391 | 0.574822 | 32.00602 | 1 |
| 15610058 |           | 0 | 0 | 0.1981   | 45.81  | 3.67E-05 | 4 | 3777.9782 | 0.245851 | 44.01834 | 2 |
| 15610058 |           | 0 | 0 | 0.05841  | 34.63  | 0.000568 | 2 | 1499.7493 | -2.01775 | 30.38937 | 0 |
| 15610058 |           | 0 | 0 | 0.316    | 31.96  | 0.000635 | 2 | 1054.6    | -0.3775  | 18.20816 | 0 |
| 15610058 | M15(Oxid: | 0 | 0 | 0.315    | 31.69  | 0.001423 | 4 | 2311.2528 | -1.02887 | 31.52177 | 2 |
| 15610058 |           | 0 | 0 | 0.2517   | 23.39  | 0.010079 | 3 | 1939.0446 | 0.783126 | 33.23851 | 1 |
| 15610583 |           | 0 | 0 | 0.7056   | 80.88  | 1.51E-08 | 2 | 1297.7188 | 2.848305 | 38.78749 | 0 |
| 15610583 |           | 0 | 0 | 0.651    | 49.77  | 1.05E-05 | 2 | 1177.7052 | 0.014005 | 26.10407 | 0 |
| 15610583 |           | 0 | 0 | 0.7514   | 43.27  | 0.000125 | 2 | 963.51012 | -1.42489 | 28.14585 | 0 |
| 15610583 |           | 0 | 0 | 0.6366   | 37.48  | 0.000277 | 3 | 1296.7754 | 0.542482 | 23.4766  | 1 |
| 57116701 |           | 0 | 0 | 0.1287   | 96.95  | 3.03E-10 | 3 | 3435.6738 | 0.972136 | 46.84489 | 0 |
| 57116701 | C21(Carba | 0 | 0 | 0.1166   | 77.25  | 3.67E-08 | 2 | 2652.3584 | -0.22594 | 44.13994 | 0 |

|          |           |   |   |          |        |          |   |           |          |          |   |
|----------|-----------|---|---|----------|--------|----------|---|-----------|----------|----------|---|
| 57116701 | M10(Oxid. | 0 | 0 | 0.3819   | 63.7   | 4.26E-07 | 3 | 4070.9183 | 2.203871 | 44.02969 | 0 |
| 57116701 |           | 0 | 0 | 0.06898  | 62.74  | 9.05E-07 | 4 | 2980.4611 | -1.25518 | 43.52537 | 0 |
| 57116701 | C9(Carban | 0 | 0 | 0.2481   | 62.28  | 6.21E-07 | 2 | 1510.7209 | -0.77612 | 26.18025 | 0 |
| 57116701 |           | 0 | 0 | 0.4702   | 57.45  | 4.05E-06 | 2 | 1019.5355 | -1.27732 | 20.50874 | 0 |
| 57116701 | M5(Oxidat | 0 | 0 | 0.412    | 41.25  | 0.000127 | 2 | 1036.5444 | -1.20321 | 20.7129  | 0 |
| 57116701 | M10(Oxid. | 0 | 0 | 0.4942   | 40.1   | 9.75E-05 | 3 | 4086.9104 | 1.498004 | 41.75913 | 0 |
| 57116701 |           | 0 | 0 | 0.4449   | 32.18  | 0.000878 | 2 | 1155.6712 | -1.79214 | 28.75175 | 1 |
| 15611030 |           | 0 | 0 | 0.000067 | 86.37  | 2.54E-09 | 2 | 1826.8715 | 0.698604 | 25.26058 | 0 |
| 15611030 |           | 0 | 0 | 4.75E-05 | 77.51  | 4.52E-08 | 2 | 1445.7804 | 1.578252 | 36.69717 | 0 |
| 15611030 | M12(Oxid. | 0 | 0 | 0.01948  | 74     | 1.04E-07 | 2 | 1461.7735 | 0.279659 | 31.81401 | 0 |
| 15611030 | C10(Carba | 0 | 0 | 9.4E-05  | 69.45  | 1.13E-07 | 3 | 2212.0158 | -0.78799 | 30.55987 | 0 |
| 15611030 |           | 0 | 0 | 0.113    | 67.42  | 3.62E-07 | 2 | 2178.179  | 1.097879 | 36.45047 | 0 |
| 15611030 | M9(Oxidat | 0 | 0 | 0.000436 | 61.54  | 7E-07    | 2 | 1842.8661 | 0.537297 | 21.66167 | 0 |
| 15611030 |           | 0 | 0 | 0.006556 | 60.94  | 2.62E-06 | 2 | 1129.6319 | -0.49376 | 25.77291 | 0 |
| 15611030 |           | 0 | 0 | 0.001444 | 57.35  | 3.77E-06 | 2 | 1940.0358 | 0.460249 | 29.83892 | 0 |
| 15611030 | M6(Oxidat | 0 | 0 | 0.000498 | 55.79  | 2.63E-06 | 2 | 1579.7165 | -0.32793 | 19.44734 | 0 |
| 15611030 |           | 0 | 0 | 0.01419  | 55.47  | 2.83E-06 | 2 | 1563.7225 | 0.241992 | 22.38129 | 0 |
| 15611030 |           | 0 | 0 | 0.06917  | 54.65  | 8.06E-06 | 2 | 1341.7663 | -0.68443 | 29.93902 | 1 |
| 15611030 | N-Term(A  | 0 | 0 | 0.08233  | 54.32  | 1.26E-05 | 2 | 1171.6446 | 1.342172 | 31.85698 | 0 |
| 15611030 | M6(Oxidat | 0 | 0 | 0.1093   | 52.19  | 1.39E-05 | 2 | 1088.5762 | -0.64931 | 29.30915 | 0 |
| 15611030 |           | 0 | 0 | 0.001684 | 51.15  | 2.38E-05 | 2 | 931.48253 | -1.98693 | 18.64163 | 0 |
| 15611030 | M10(Oxid. | 0 | 0 | 0.2292   | 49.26  | 1.18E-05 | 2 | 1763.7887 | 0.372827 | 32.77579 | 0 |
| 15611030 |           | 0 | 0 | 0.2656   | 47.75  | 1.67E-05 | 2 | 1747.7934 | 0.120872 | 36.18189 | 0 |
| 15611030 |           | 0 | 0 | 0.07155  | 46.44  | 2.27E-05 | 2 | 775.46782 | 0.721805 | 20.96535 | 0 |
| 15611030 | N-Term(A  | 0 | 0 | 0.003609 | 45.57  | 7.21E-05 | 3 | 1982.0451 | -0.20595 | 33.29741 | 0 |
| 15611030 |           | 0 | 0 | 0.000924 | 44.98  | 5.88E-05 | 2 | 873.50377 | -0.33263 | 18.68609 | 0 |
| 15611030 |           | 0 | 0 | 0.08103  | 44.97  | 8.28E-05 | 2 | 1585.8595 | 0.65792  | 31.02318 | 0 |
| 15611030 |           | 0 | 0 | 0.1113   | 44.79  | 8.63E-05 | 2 | 1072.5817 | -0.27845 | 31.30841 | 0 |
| 15611030 | N-Term(A  | 0 | 0 | 0.0106   | 43.98  | 9.6E-05  | 2 | 1185.6387 | 1.006355 | 29.38287 | 0 |
| 15611030 |           | 0 | 0 | 0.2698   | 39.95  | 0.000121 | 3 | 1565.8811 | 3.350425 | 23.6311  | 1 |
| 15611030 | M8(Oxidat | 0 | 0 | 0.1128   | 39.59  | 0.00011  | 2 | 1779.7822 | -0.47714 | 29.3385  | 0 |
| 15611030 | N-Term(A  | 0 | 0 | 0.007076 | 35.78  | 0.000687 | 2 | 1114.5916 | -0.87563 | 33.33409 | 0 |
| 15611030 |           | 0 | 0 | 0.1003   | 30.55  | 0.000969 | 2 | 1053.5838 | -0.25007 | 21.35573 | 0 |
| 15611030 | M8(Oxidat | 0 | 0 | 0.08559  | 29.69  | 0.002255 | 2 | 1357.7637 | 1.180746 | 27.36287 | 1 |
| 15611030 |           | 0 | 0 | 0.04617  | 27.38  | 0.002377 | 2 | 1027.532  | 0.037683 | 21.09964 | 0 |
| 57117112 |           | 0 | 0 | 5.84E-05 | 111.71 | 1.48E-11 | 2 | 2137.094  | -3.92101 | 33.28056 | 0 |

|          |           |   |   |          |        |          |   |           |          |          |   |
|----------|-----------|---|---|----------|--------|----------|---|-----------|----------|----------|---|
| 57117112 |           | 0 | 0 | 0.00147  | 103.51 | 1.18E-10 | 2 | 1781.9035 | 0.324755 | 34.93712 | 0 |
| 57117112 |           | 0 | 0 | 0.003985 | 92.6   | 1.35E-09 | 2 | 2456.2325 | -0.57072 | 40.9557  | 0 |
| 57117112 | M2(Oxidat | 0 | 0 | 0.003978 | 90.87  | 1.88E-09 | 2 | 2472.2352 | 2.576098 | 38.91382 | 0 |
| 57117112 |           | 0 | 0 | 0.009578 | 78.42  | 2.52E-08 | 4 | 2311.1395 | 1.793822 | 37.64151 | 0 |
| 57117112 |           | 0 | 0 | 0.002951 | 71.07  | 1.88E-07 | 2 | 1485.7698 | 0.095364 | 28.30999 | 0 |
| 57117112 |           | 0 | 0 | 0.002257 | 71     | 1.55E-07 | 2 | 1952.957  | -1.59989 | 32.89218 | 0 |
| 57117112 |           | 0 | 0 | 0.000665 | 69.1   | 1.48E-07 | 4 | 3186.6701 | 1.824271 | 40.71771 | 0 |
| 57117112 |           | 0 | 0 | 0.01486  | 64.14  | 8.67E-07 | 2 | 1657.9103 | 4.954803 | 30.05242 | 0 |
| 57117112 |           | 0 | 0 | 0.005015 | 62.65  | 5.43E-07 | 2 | 3033.4224 | 1.262462 | 39.20384 | 0 |
| 57117112 |           | 0 | 0 | 0.03634  | 60.53  | 1.02E-06 | 2 | 1676.8034 | 0.358435 | 30.87877 | 0 |
| 57117112 |           | 0 | 0 | 0.01433  | 59.13  | 1.22E-06 | 2 | 1043.658  | 0.762015 | 24.76932 | 1 |
| 57117112 |           | 0 | 0 | 0.05747  | 58.77  | 1.99E-06 | 2 | 1064.5734 | -0.1122  | 28.33788 | 0 |
| 57117112 |           | 0 | 0 | 0.01268  | 53.04  | 9.19E-06 | 3 | 3263.6396 | -1.09379 | 39.95629 | 1 |
| 57117112 |           | 0 | 0 | 0.01327  | 50.31  | 1.54E-05 | 3 | 1660.9169 | -0.0825  | 43.99079 | 0 |
| 57117112 |           | 0 | 0 | 0.03373  | 50.14  | 1.11E-05 | 2 | 776.44267 | 1.652732 | 23.11376 | 0 |
| 57117112 |           | 0 | 0 | 0.2483   | 49.6   | 1.09E-05 | 2 | 1035.4458 | -0.69817 | 29.40721 | 0 |
| 57117112 | M5(Oxidat | 0 | 0 | 0.21     | 40.7   | 8.49E-05 | 2 | 1051.4413 | -0.14696 | 25.54557 | 0 |
| 57117112 |           | 0 | 0 | 0.06151  | 39.63  | 0.000109 | 2 | 910.49932 | 0.037207 | 24.46939 | 0 |
| 57117112 |           | 0 | 0 | 0.2182   | 38.22  | 0.00015  | 3 | 1574.9992 | -0.03848 | 34.78558 | 0 |
| 57117112 |           | 0 | 0 | 0.06469  | 34.39  | 0.00091  | 3 | 1275.6771 | 1.98     | 22.68479 | 1 |
| 57117112 | M10(Oxid. | 0 | 0 | 0.04399  | 32.67  | 0.000539 | 3 | 1479.6518 | -1.03248 | 18.16584 | 1 |
| 15610690 |           | 0 | 0 | 0.02022  | 120.28 | 1.08E-12 | 3 | 3637.9566 | -3.73648 | 39.50094 | 1 |
| 15610690 |           | 0 | 0 | 0.01409  | 109.66 | 1.78E-11 | 2 | 2022.9847 | -1.65822 | 31.24503 | 0 |
| 15610690 |           | 0 | 0 | 0.02027  | 100.27 | 1.08E-10 | 3 | 3055.6501 | 1.207043 | 46.67737 | 1 |
| 15610690 |           | 0 | 0 | 0.013043 | 99.98  | 1.51E-10 | 2 | 1956.0796 | -0.27292 | 47.88151 | 0 |
| 15610690 |           | 0 | 0 | 0.02634  | 91.03  | 9.07E-10 | 2 | 2566.4139 | 0.40705  | 46.71155 | 0 |
| 15610690 | C7(Carban | 0 | 0 | 0.0353   | 89.42  | 1.14E-09 | 2 | 1749.6438 | -0.57833 | 16.61117 | 0 |
| 15610690 |           | 0 | 0 | 0.05355  | 76.3   | 3.05E-08 | 2 | 2083.1524 | -1.10887 | 34.68304 | 0 |
| 15610690 | C17(Carba | 0 | 0 | 0.05695  | 70.4   | 1.87E-07 | 3 | 3034.5329 | 1.654885 | 40.34197 | 0 |
| 15610690 |           | 0 | 0 | 0.305    | 67.26  | 3.76E-07 | 2 | 1090.5752 | -0.00769 | 13.97102 | 0 |
| 15610690 | M8(Oxidat | 0 | 0 | 0.1214   | 64.92  | 5.64E-07 | 2 | 1375.6862 | -1.79654 | 26.20426 | 0 |
| 15610690 |           | 0 | 0 | 0.3073   | 60.84  | 1.15E-06 | 2 | 1152.616  | -0.04937 | 26.19829 | 0 |
| 15610690 |           | 0 | 0 | 0.08932  | 60.63  | 9.95E-07 | 3 | 2588.3822 | -0.40026 | 34.96971 | 1 |
| 15610690 |           | 0 | 0 | 0.3212   | 60.28  | 2.2E-06  | 2 | 916.48473 | 0.007065 | 17.01164 | 0 |
| 15610690 | C5(Carban | 0 | 0 | 0.1979   | 57.51  | 1.86E-06 | 2 | 1152.5452 | -1.25087 | 20.67284 | 0 |
| 15610690 |           | 0 | 0 | 0.2716   | 56.89  | 2.04E-06 | 2 | 1384.6689 | -1.0764  | 20.18228 | 0 |



|          |           |   |   |          |        |          |   |           |          |          |   |
|----------|-----------|---|---|----------|--------|----------|---|-----------|----------|----------|---|
| 15610690 |           | 0 | 0 | 0.3661   | 56.79  | 3.35E-06 | 2 | 1169.6059 | -0.29817 | 17.61514 | 0 |
| 15610690 |           | 0 | 0 | 0.4606   | 50.06  | 2.47E-05 | 2 | 1658.8398 | -0.04342 | 24.34947 | 1 |
| 15610690 |           | 0 | 0 | 0.1982   | 41.63  | 0.000103 | 2 | 983.53325 | 2.368424 | 30.36416 | 0 |
| 15610690 |           | 0 | 0 | 0.3643   | 41.57  | 0.000174 | 2 | 1179.5743 | -0.89435 | 16.9836  | 1 |
| 15610690 |           | 0 | 0 | 0.5175   | 39.61  | 0.000224 | 2 | 1088.5683 | -1.1358  | 16.24678 | 1 |
| 15610690 |           | 0 | 0 | 0.268    | 38.6   | 0.000138 | 2 | 1023.4731 | -1.1053  | 18.83332 | 0 |
| 15610690 |           | 0 | 0 | 0.2926   | 34.83  | 0.000526 | 5 | 3556.8641 | -0.01077 | 40.82672 | 0 |
| 15610690 | C6(Carban | 0 | 0 | 0.4231   | 31.1   | 0.001164 | 2 | 1308.6462 | -1.22993 | 18.19318 | 1 |
| 15610690 |           | 0 | 0 | 0.4529   | 28.26  | 0.001791 | 2 | 1280.7103 | -0.61577 | 23.72344 | 1 |
| 15610690 |           | 0 | 0 | 0.1761   | 21.1   | 0.011644 | 4 | 3513.7826 | 0.669415 | 47.81631 | 0 |
| 15610690 |           | 0 | 0 | 0.1209   | 12.56  | 0.061009 | 5 | 4206.2391 | 1.02745  | 46.92866 | 2 |
| 15609463 |           | 0 | 0 | 0.02495  | 96.29  | 3.52E-10 | 2 | 1752.9468 | -1.32141 | 35.35581 | 0 |
| 15609463 |           | 0 | 0 | 0.015383 | 89.68  | 2.31E-09 | 3 | 2600.3514 | -0.51061 | 34.34289 | 1 |
| 15609463 |           | 0 | 0 | 0.06022  | 78.19  | 1.52E-08 | 2 | 1593.9347 | 1.486059 | 35.21271 | 0 |
| 15609463 |           | 0 | 0 | 0.1375   | 77.49  | 3.65E-08 | 2 | 1399.7795 | 0.18949  | 33.84094 | 0 |
| 15609463 |           | 0 | 0 | 0.02577  | 76.5   | 3.13E-08 | 2 | 1356.7843 | -0.19306 | 42.28579 | 0 |
| 15609463 |           | 0 | 0 | 0.06466  | 72.26  | 5.93E-08 | 2 | 2027.9413 | -0.2266  | 21.50957 | 0 |
| 15609463 |           | 0 | 0 | 0.1475   | 63     | 5E-07    | 2 | 911.60332 | -0.44122 | 31.95693 | 0 |
| 15609463 |           | 0 | 0 | 0.184    | 61.27  | 7.45E-07 | 2 | 869.55693 | 0.185226 | 28.30527 | 0 |
| 15609463 |           | 0 | 0 | 0.1246   | 60.3   | 1.54E-06 | 2 | 1219.5906 | -0.62113 | 19.79012 | 0 |
| 15609463 |           | 0 | 0 | 0.1276   | 59.43  | 1.71E-06 | 2 | 1104.547  | 0.328976 | 19.135   | 0 |
| 15609463 |           | 0 | 0 | 0.05842  | 57.06  | 3.25E-06 | 2 | 1962.074  | -1.41131 | 27.27818 | 0 |
| 15609463 |           | 0 | 0 | 0.06107  | 55.16  | 8.38E-06 | 3 | 1528.8071 | -0.48977 | 28.33386 | 1 |
| 15609463 |           | 0 | 0 | 0.1713   | 29.47  | 0.002542 | 3 | 1260.6466 | -0.94493 | 18.91776 | 1 |
| 57117112 |           | 0 | 0 | 0.001173 | 122.53 | 1.4E-12  | 2 | 2026.0697 | -0.29197 | 44.08087 | 0 |
| 57117112 |           | 0 | 0 | 0.07602  | 90.3   | 2.61E-09 | 2 | 2064.0369 | 0.582128 | 29.9658  | 0 |
| 57117112 |           | 0 | 0 | 0.02279  | 88.82  | 3.74E-09 | 2 | 974.52611 | -0.49428 | 19.92515 | 0 |
| 57117112 |           | 0 | 0 | 0.03104  | 84.29  | 9.5E-09  | 2 | 1486.8234 | 0.63932  | 31.55989 | 0 |
| 57117112 |           | 0 | 0 | 0.05328  | 78.95  | 1.4E-08  | 2 | 1291.7259 | 0.159768 | 33.70919 | 0 |
| 57117112 |           | 0 | 0 | 0.0605   | 77.62  | 5.02E-08 | 2 | 1428.7599 | 0.338751 | 34.62741 | 0 |
| 57117112 |           | 0 | 0 | 0.04042  | 75.4   | 3.89E-08 | 2 | 1201.689  | -0.7896  | 28.4528  | 0 |
| 57117112 |           | 0 | 0 | 0.0106   | 72.83  | 5.73E-08 | 2 | 3045.6358 | -0.36167 | 39.70924 | 0 |
| 57117112 |           | 0 | 0 | 0.0116   | 71.28  | 1.71E-07 | 2 | 1672.8672 | -1.30686 | 30.51026 | 0 |
| 57117112 |           | 0 | 0 | 0.08329  | 69.92  | 1.17E-07 | 2 | 957.57311 | 0.308468 | 26.65962 | 0 |
| 57117112 |           | 0 | 0 | 0.1167   | 59.18  | 2.9E-06  | 3 | 2518.3302 | 0.032977 | 38.51573 | 0 |
| 57117112 |           | 0 | 0 | 0.1946   | 58.76  | 1.53E-06 | 3 | 2583.4147 | 0.188008 | 50.00474 | 1 |

|          |           |   |   |          |        |          |   |           |          |          |   |
|----------|-----------|---|---|----------|--------|----------|---|-----------|----------|----------|---|
| 57117112 | C4(Carban | 0 | 0 | 0.2505   | 56.04  | 3.73E-06 | 2 | 1770.8583 | 0.225126 | 23.0425  | 0 |
| 57117112 |           | 0 | 0 | 0.4332   | 52.83  | 9.64E-06 | 2 | 1150.5711 | -2.45859 | 24.35453 | 0 |
| 57117112 | M16(Oxid. | 0 | 0 | 0.1435   | 50.26  | 1.22E-05 | 3 | 3790.964  | 0.674255 | 45.86472 | 0 |
| 57117112 |           | 0 | 0 | 0.5135   | 49.82  | 1.77E-05 | 2 | 1109.5613 | -1.1756  | 23.44264 | 0 |
| 57117112 |           | 0 | 0 | 0.2877   | 48.71  | 2.42E-05 | 2 | 776.44072 | -0.86275 | 23.90832 | 0 |
| 57117112 |           | 0 | 0 | 0.07656  | 45.75  | 6.25E-05 | 2 | 1973.0068 | 0.598156 | 43.15508 | 0 |
| 57117112 |           | 0 | 0 | 0.3618   | 44.16  | 6.14E-05 | 3 | 1996.0873 | 0.471969 | 49.61204 | 1 |
| 57117112 |           | 0 | 0 | 0.3589   | 24.19  | 0.00705  | 4 | 2951.5954 | 0.100393 | 47.87906 | 2 |
| 57117112 |           | 0 | 0 | 0.3773   | 14.09  | 0.07019  | 3 | 1630.9127 | 0.221682 | 27.94475 | 1 |
| 15611006 |           | 0 | 0 | 0.009539 | 108.87 | 1.29E-11 | 2 | 1692.9758 | 0.091145 | 29.16851 | 0 |
| 15611006 |           | 0 | 0 | 0.007273 | 98.17  | 2.67E-10 | 2 | 2138.087  | -1.95485 | 33.57055 | 0 |
| 15611006 | N-Term(A  | 0 | 0 | 0.01316  | 92.68  | 5.93E-10 | 2 | 1734.987  | 0.472497 | 36.44393 | 0 |
| 15611006 |           | 0 | 0 | 0.000954 | 86.37  | 4.61E-09 | 3 | 2232.1651 | -0.39739 | 37.04315 | 0 |
| 15611006 |           | 0 | 0 | 0.002185 | 78.11  | 2.32E-08 | 2 | 1421.7277 | 0.385047 | 26.35079 | 0 |
| 15611006 |           | 0 | 0 | 0.00546  | 77.81  | 2.73E-08 | 2 | 1059.5425 | -0.41832 | 22.39315 | 0 |
| 15611006 |           | 0 | 0 | 0.006692 | 72.36  | 1.1E-07  | 2 | 1504.8014 | 0.530236 | 25.84878 | 0 |
| 15611006 |           | 0 | 0 | 0.03037  | 63.8   | 7.3E-07  | 2 | 1219.5982 | -0.49128 | 26.99528 | 0 |
| 15611006 | M1(Oxidat | 0 | 0 | 0.005692 | 62.33  | 8.48E-07 | 2 | 1235.5947 | 0.765454 | 24.22741 | 0 |
| 15611006 |           | 0 | 0 | 0.01009  | 60.81  | 9.96E-07 | 2 | 1383.6612 | -0.0151  | 14.52803 | 1 |
| 15611006 |           | 0 | 0 | 0.0703   | 59.41  | 1.14E-06 | 2 | 1956.9152 | -0.36924 | 20.50779 | 1 |
| 15611006 | M11(Oxid. | 0 | 0 | 0.006007 | 58.8   | 2.7E-06  | 3 | 2154.0862 | 0.074042 | 26.90942 | 0 |
| 15611006 |           | 0 | 0 | 0.00441  | 58.71  | 2.36E-06 | 2 | 2323.1629 | -2.11432 | 31.39571 | 0 |
| 15611006 | N-Term(A  | 0 | 0 | 0.01205  | 56.54  | 2.21E-06 | 2 | 1279.7123 | 0.438827 | 29.27963 | 0 |
| 15611006 |           | 0 | 0 | 0.03471  | 49.41  | 1.14E-05 | 2 | 1237.7002 | -0.77433 | 24.34183 | 0 |
| 15611006 |           | 0 | 0 | 0.02496  | 48.59  | 2.91E-05 | 4 | 2226.0993 | -0.83439 | 22.66158 | 2 |
| 15611006 | M1(Oxidat | 0 | 0 | 0.1153   | 48.25  | 2.62E-05 | 2 | 1391.695  | 0.12042  | 22.60544 | 1 |
| 15611006 |           | 0 | 0 | 0.1931   | 47.96  | 4E-05    | 2 | 874.43303 | -1.04102 | 19.74904 | 0 |
| 15611006 |           | 0 | 0 | 0.02058  | 46.33  | 5.59E-05 | 3 | 1375.6995 | -0.32331 | 24.2131  | 1 |
| 15611006 |           | 0 | 0 | 0.1055   | 41.64  | 6.84E-05 | 2 | 1026.4911 | -1.3491  | 25.46268 | 0 |
| 15611006 |           | 0 | 0 | 0.08233  | 40.93  | 0.000178 | 3 | 1361.7412 | -0.84172 | 24.31326 | 1 |
| 15611006 |           | 0 | 0 | 0.07     | 39.61  | 0.000137 | 3 | 2033.9775 | -0.68838 | 20.92376 | 0 |
| 15611006 | N-Term(A  | 0 | 0 | 0.0733   | 39.11  | 0.00019  | 2 | 1101.5507 | -2.56867 | 26.89899 | 0 |
| 15611006 |           | 0 | 0 | 0.1705   | 39.03  | 0.000225 | 2 | 861.45738 | -0.43795 | 18.64571 | 0 |
| 15611006 |           | 0 | 0 | 0.008798 | 36.15  | 0.000255 | 3 | 1973.9359 | -1.41094 | 27.48042 | 0 |
| 15611006 |           | 0 | 0 | 0.05318  | 35.97  | 0.000252 | 2 | 1172.5018 | 1.403224 | 14.15484 | 1 |
| 15611006 |           | 0 | 0 | 0.1417   | 29.24  | 0.002204 | 3 | 1790.8802 | -0.68634 | 19.37686 | 1 |

|          |           |   |   |          |        |          |   |           |          |          |   |
|----------|-----------|---|---|----------|--------|----------|---|-----------|----------|----------|---|
| 15611006 |           | 0 | 0 | 0.07076  | 27.69  | 0.003064 | 2 | 864.45763 | 0.216165 | 25.13806 | 0 |
| 15611006 | M1(Oxidat | 0 | 0 | 0.2614   | 19.25  | 0.033278 | 3 | 1989.054  | -0.35548 | 26.89513 | 2 |
| 15611006 |           | 0 | 0 | 0.2614   | 18.49  | 0.028316 | 3 | 1973.0594 | -0.21336 | 28.82119 | 2 |
| 15610501 | M8(Oxidat | 0 | 0 | 3.81E-05 | 113.01 | 4.99E-12 | 2 | 1353.5947 | -0.37988 | 18.86984 | 0 |
| 15610501 |           | 0 | 0 | 0.00743  | 110.4  | 1.87E-11 | 2 | 1342.7682 | -0.54754 | 39.10708 | 0 |
| 15610501 |           | 0 | 0 | 5.11E-05 | 106.26 | 2.36E-11 | 2 | 1337.5997 | -0.44432 | 22.51546 | 0 |
| 15610501 |           | 0 | 0 | 0.01273  | 99.03  | 2.75E-10 | 2 | 1540.8809 | 0.172417 | 33.7701  | 0 |
| 15610501 |           | 0 | 0 | 0.01411  | 95.39  | 5.49E-10 | 3 | 3402.7899 | -0.18843 | 38.97921 | 0 |
| 15610501 |           | 0 | 0 | 0.05151  | 85.09  | 7.43E-09 | 2 | 1742.9256 | -1.60454 | 36.12753 | 0 |
| 15610501 |           | 0 | 0 | 0.01947  | 77.72  | 3.3E-08  | 2 | 1466.7603 | 0.300121 | 24.66326 | 0 |
| 15610501 |           | 0 | 0 | 0.01472  | 77.54  | 2.03E-08 | 2 | 1696.9834 | 0.992783 | 32.28637 | 1 |
| 15610501 |           | 0 | 0 | 0.00615  | 77.17  | 3.93E-08 | 2 | 1996.0009 | -1.0467  | 22.24679 | 1 |
| 15610501 | M6(Oxidat | 0 | 0 | 0.0213   | 77.06  | 2.46E-08 | 2 | 1485.7072 | -0.33343 | 29.64354 | 0 |
| 15610501 |           | 0 | 0 | 0.03413  | 70.54  | 1.02E-07 | 2 | 1469.7153 | 1.684857 | 38.47941 | 0 |
| 15610501 | N-Term(A  | 0 | 0 | 0.05626  | 65.75  | 7.98E-07 | 2 | 1114.6081 | -2.01548 | 35.86984 | 0 |
| 15610501 |           | 0 | 0 | 0.01466  | 65.22  | 4.51E-07 | 2 | 1839.9006 | -0.71254 | 23.74154 | 0 |
| 15610501 | M6(Oxidat | 0 | 0 | 0.001773 | 63.37  | 4.59E-07 | 2 | 1501.702  | -0.4391  | 29.51828 | 0 |
| 15610501 | M15(Oxid: | 0 | 0 | 0.03469  | 63.36  | 8.3E-07  | 2 | 1855.8964 | -0.20281 | 21.10718 | 0 |
| 15610501 |           | 0 | 0 | 0.0002   | 62.69  | 1.16E-06 | 3 | 2554.274  | -0.1763  | 35.23618 | 1 |
| 15610501 |           | 0 | 0 | 0.05507  | 61.09  | 1.52E-06 | 2 | 1277.6862 | 1.012397 | 22.28925 | 0 |
| 15610501 |           | 0 | 0 | 0.004293 | 60.52  | 8.87E-07 | 3 | 1493.7005 | -0.58056 | 20.72228 | 1 |
| 15610501 |           | 0 | 0 | 0.0223   | 60.03  | 2.48E-06 | 3 | 2569.287  | -0.91848 | 43.20351 | 1 |
| 15610501 |           | 0 | 0 | 0.03354  | 59.59  | 1.48E-06 | 3 | 3357.6559 | -1.20155 | 40.00396 | 0 |
| 15610501 | M16(Oxid: | 0 | 0 | 0.003501 | 58.95  | 2.87E-06 | 2 | 2011.9974 | -0.2705  | 19.75895 | 1 |
| 15610501 |           | 0 | 0 | 0.002424 | 56.91  | 2.03E-06 | 2 | 1059.5068 | 0.160609 | 14.38654 | 0 |
| 15610501 |           | 0 | 0 | 0.02031  | 55.41  | 7.77E-06 | 4 | 2725.3903 | -0.08138 | 41.1335  | 2 |
| 15610501 |           | 0 | 0 | 0.11     | 51.27  | 2.28E-05 | 2 | 1072.5989 | -0.78011 | 25.20042 | 0 |
| 15610501 |           | 0 | 0 | 0.03922  | 49.58  | 2.37E-05 | 2 | 1328.6922 | 0.304789 | 16.05158 | 1 |
| 15610501 | N-Term(A  | 0 | 0 | 0.008958 | 48.73  | 3.48E-05 | 2 | 1057.5607 | -0.4631  | 32.37388 | 0 |
| 15610501 |           | 0 | 0 | 0.01545  | 48.52  | 3.59E-05 | 2 | 920.48436 | 0.782483 | 23.99606 | 0 |
| 15610501 | M2(Oxidat | 0 | 0 | 0.1021   | 47.4   | 5E-05    | 2 | 1031.5469 | 1.324514 | 25.4647  | 0 |
| 15610501 |           | 0 | 0 | 0.2853   | 45.15  | 4.58E-05 | 3 | 1986.0547 | -3.42873 | 34.39308 | 1 |
| 15610501 |           | 0 | 0 | 0.2175   | 39.1   | 0.000185 | 2 | 1561.7593 | -0.81085 | 30.28146 | 1 |
| 15610501 | N-Term(A  | 0 | 0 | 0.2202   | 38.07  | 0.000242 | 2 | 1319.6844 | 2.142536 | 16.99932 | 1 |
| 15610501 |           | 0 | 0 | 0.09388  | 37.89  | 0.000488 | 2 | 1015.5502 | -0.47643 | 27.77874 | 0 |
| 15610501 |           | 0 | 0 | 0.07619  | 37.55  | 0.000175 | 2 | 795.44695 | -0.31968 | 14.70222 | 0 |

|          |           |   |   |          |        |          |   |           |          |          |   |
|----------|-----------|---|---|----------|--------|----------|---|-----------|----------|----------|---|
| 15610501 | M8(Oxidat | 0 | 0 | 0.2928   | 35.78  | 0.000264 | 3 | 1509.6949 | -0.8852  | 16.72393 | 1 |
| 15610501 |           | 0 | 0 | 0.0344   | 33.48  | 0.00083  | 3 | 1277.6707 | -0.25309 | 14.53002 | 1 |
| 15610501 |           | 0 | 0 | 0.00825  | 32.28  | 0.00059  | 3 | 2407.1074 | 0.653769 | 31.90837 | 0 |
| 15610501 |           | 0 | 0 | 0.05495  | 31.09  | 0.001323 | 2 | 1007.514  | -1.68502 | 17.55376 | 0 |
| 15610501 | M6(Oxidat | 0 | 0 | 0.051    | 30.24  | 0.001372 | 3 | 1657.8025 | -0.76484 | 24.43185 | 1 |
| 15610501 |           | 0 | 0 | 0.09854  | 25.44  | 0.005572 | 2 | 1625.8128 | -0.68247 | 34.00921 | 1 |
| 15610501 |           | 0 | 0 | 0.2966   | 24.79  | 0.005808 | 2 | 1341.7843 | -0.44861 | 26.90373 | 1 |
| 15610501 |           | 0 | 0 | 0.08375  | 19.09  | 0.026512 | 3 | 3285.6705 | -0.19051 | 41.16186 | 2 |
| 15610501 |           | 0 | 0 | 0.07479  | 16.89  | 0.056277 | 3 | 1430.7367 | -1.43552 | 23.46197 | 1 |
| 15610501 |           | 0 | 0 | 0.2151   | 11.07  | 0.195407 | 3 | 2317.2035 | 0.001754 | 44.47077 | 1 |
| 57116694 |           | 0 | 0 | 0.007144 | 53.22  | 4.75E-06 | 3 | 2996.6865 | 1.473379 | 49.86352 | 0 |
| 57116694 |           | 0 | 0 | 0.01348  | 52.77  | 5.55E-06 | 3 | 4295.0973 | 2.6034   | 44.93911 | 0 |
| 15609885 |           | 0 | 0 | 9.27E-07 | 95.65  | 5.58E-10 | 2 | 1293.679  | -0.6096  | 26.00156 | 0 |
| 15609885 |           | 0 | 0 | 1.26E-15 | 94.44  | 3.59E-10 | 2 | 2727.0874 | 0.747553 | 36.51467 | 0 |
| 15609885 |           | 0 | 0 | 0.02005  | 58.48  | 3.83E-06 | 2 | 858.50566 | 1.4811   | 23.55168 | 0 |
| 15609885 |           | 0 | 0 | 1.87E-08 | 56.55  | 4.09E-06 | 2 | 1268.649  | 0.640114 | 26.9225  | 0 |
| 15609885 | M2(Oxidat | 0 | 0 | 2.84E-06 | 45.97  | 2.52E-05 | 2 | 1040.4745 | -0.60203 | 17.98953 | 0 |
| 15609885 | M19(Oxid: | 0 | 0 | 0.006676 | 32.68  | 0.000944 | 3 | 2844.3889 | -2.07502 | 47.87444 | 0 |
| 15610746 |           | 0 | 0 | 0.000449 | 102.02 | 1.6E-10  | 2 | 1342.7061 | -0.9898  | 21.51975 | 0 |
| 15610746 |           | 0 | 0 | 0.0301   | 95.01  | 6.63E-10 | 3 | 2462.237  | -1.65649 | 31.78845 | 1 |
| 15610746 | M4(Oxidat | 0 | 0 | 0.000234 | 94.02  | 9.91E-10 | 2 | 2217.1536 | -0.39431 | 41.16056 | 0 |
| 15610746 | M2(Oxidat | 0 | 0 | 0.05622  | 86.8   | 2.08E-09 | 2 | 1607.7137 | 1.097425 | 16.82747 | 0 |
| 15610746 | M3(Oxidat | 0 | 0 | 0.03096  | 86.25  | 3.68E-09 | 2 | 1541.7443 | -0.55198 | 31.64582 | 0 |
| 15610746 |           | 0 | 0 | 0.01642  | 85.78  | 2.64E-09 | 2 | 1964.9396 | 0.662358 | 37.85014 | 0 |
| 15610746 | M22(Oxid: | 0 | 0 | 0.000973 | 82.41  | 5.73E-09 | 3 | 2987.382  | -3.13456 | 31.10382 | 1 |
| 15610746 |           | 0 | 0 | 0.02106  | 81.3   | 1.74E-08 | 2 | 2201.1597 | 0.065542 | 43.13577 | 0 |
| 15610746 |           | 0 | 0 | 0.001836 | 80.63  | 1.69E-08 | 2 | 1509.7569 | 1.028137 | 40.79771 | 0 |
| 15610746 | M11(Oxid: | 0 | 0 | 0.03495  | 79.91  | 1.12E-08 | 2 | 1525.7511 | 0.589829 | 35.10421 | 0 |
| 15610746 |           | 0 | 0 | 0.04057  | 75.01  | 3.47E-08 | 3 | 2971.3897 | -2.25405 | 37.73255 | 1 |
| 15610746 | M11(Oxid: | 0 | 0 | 0.03572  | 71.9   | 1.26E-07 | 2 | 1980.936  | 1.375302 | 33.00023 | 0 |
| 15610746 |           | 0 | 0 | 0.01862  | 70.99  | 7.94E-08 | 3 | 2496.147  | -0.42245 | 30.91853 | 0 |
| 15610746 |           | 0 | 0 | 0.05012  | 69.55  | 1.11E-07 | 2 | 1591.7166 | -0.24563 | 18.68305 | 0 |
| 15610746 | M5(Oxidat | 0 | 0 | 0.1333   | 66.14  | 5.84E-07 | 2 | 1782.8978 | -0.72557 | 34.64759 | 1 |
| 15610746 |           | 0 | 0 | 0.1063   | 63.67  | 1.07E-06 | 2 | 934.49761 | -1.82462 | 25.79333 | 0 |
| 15610746 |           | 0 | 0 | 0.1133   | 62.85  | 1.4E-06  | 2 | 985.52867 | -2.70739 | 21.99615 | 0 |
| 15610746 | M5(Oxidat | 0 | 0 | 0.1995   | 58.18  | 2.81E-06 | 3 | 1798.8927 | -0.68206 | 29.72354 | 1 |

|          |           |   |   |          |        |          |   |           |          |          |   |
|----------|-----------|---|---|----------|--------|----------|---|-----------|----------|----------|---|
| 15610746 |           | 0 | 0 | 0.2209   | 58.17  | 4.65E-06 | 3 | 1635.8432 | -1.11716 | 18.96668 | 1 |
| 15610746 | M3(Oxidat | 0 | 0 | 0.02227  | 56.01  | 2.5E-06  | 2 | 1174.5195 | -0.29759 | 26.47956 | 0 |
| 15610746 |           | 0 | 0 | 0.1785   | 53.53  | 4.43E-06 | 2 | 1158.5251 | 0.155985 | 32.18738 | 0 |
| 15610746 | M2(Oxidat | 0 | 0 | 0.01154  | 53.1   | 4.89E-06 | 2 | 1235.528  | -0.25867 | 18.66534 | 0 |
| 15610746 |           | 0 | 0 | 0.09499  | 42.61  | 5.47E-05 | 2 | 1334.6133 | 0.665023 | 22.90076 | 0 |
| 15610746 | M2(Oxidat | 0 | 0 | 0.04713  | 42.34  | 5.82E-05 | 3 | 2478.119  | -0.51435 | 27.6499  | 1 |
| 15610746 |           | 0 | 0 | 0.1814   | 38.64  | 0.000328 | 2 | 1105.5997 | -0.39284 | 21.92107 | 1 |
| 15610746 |           | 0 | 0 | 0.2008   | 32.71  | 0.000857 | 2 | 976.48412 | -0.60818 | 22.36755 | 0 |
| 15610746 |           | 0 | 0 | 0.2209   | 23.03  | 0.004966 | 3 | 2462.1245 | -0.32713 | 28.43877 | 1 |
| 15610746 |           | 0 | 0 | 0.2128   | 16.5   | 0.022334 | 4 | 2512.4686 | -1.47372 | 36.62979 | 0 |
| 15610329 |           | 0 | 0 | 0.000394 | 114.68 | 8.68E-12 | 2 | 2043.056  | 0.6434   | 35.29288 | 0 |
| 15610329 |           | 0 | 0 | 0.003983 | 97.05  | 1.97E-10 | 2 | 1750.801  | 1.027883 | 22.4918  | 0 |
| 15610329 |           | 0 | 0 | 0.001107 | 91.8   | 1.39E-09 | 2 | 1754.8859 | -0.11365 | 34.73749 | 0 |
| 15610329 |           | 0 | 0 | 0.000961 | 87.98  | 3.74E-09 | 2 | 2244.1902 | -0.41358 | 37.22196 | 0 |
| 15610329 | M13(Oxid: | 0 | 0 | 0.002785 | 86.42  | 2.27E-09 | 2 | 1700.7529 | -0.9708  | 24.90539 | 0 |
| 15610329 |           | 0 | 0 | 0.00311  | 86     | 3.14E-09 | 2 | 1481.8437 | 0.090582 | 36.73614 | 0 |
| 15610329 |           | 0 | 0 | 0.001522 | 84.08  | 3.9E-09  | 3 | 3204.5174 | -0.59358 | 27.83219 | 1 |
| 15610329 | N-Term(A  | 0 | 0 | 0.002568 | 83.14  | 4.84E-09 | 2 | 1792.8107 | 0.55792  | 21.0611  | 0 |
| 15610329 |           | 0 | 0 | 0.001825 | 81.47  | 1.57E-08 | 2 | 2042.0157 | -2.27163 | 22.66549 | 0 |
| 15610329 |           | 0 | 0 | 0.003128 | 80.4   | 1.37E-08 | 2 | 2427.1795 | -1.3515  | 32.67997 | 0 |
| 15610329 |           | 0 | 0 | 0.006177 | 80.13  | 1.41E-08 | 2 | 1426.7341 | 1.047909 | 34.40164 | 0 |
| 15610329 |           | 0 | 0 | 0.005893 | 78.71  | 2.69E-08 | 2 | 1472.7378 | -0.12272 | 27.74707 | 0 |
| 15610329 |           | 0 | 0 | 0.007134 | 72.28  | 5.9E-08  | 2 | 1684.7583 | -0.73774 | 30.42827 | 0 |
| 15610329 |           | 0 | 0 | 0.005141 | 71.44  | 1.26E-07 | 2 | 2125.1255 | 0.308019 | 31.71993 | 0 |
| 15610329 |           | 0 | 0 | 0.05413  | 61.58  | 1.77E-06 | 2 | 1347.7148 | 1.437974 | 23.11893 | 1 |
| 15610329 |           | 0 | 0 | 0.02108  | 58.68  | 2.17E-06 | 2 | 1350.7027 | 1.046135 | 26.89014 | 0 |
| 15610329 |           | 0 | 0 | 0.005332 | 57.83  | 2.97E-06 | 2 | 1990.0604 | -2.08082 | 35.90862 | 0 |
| 15610329 |           | 0 | 0 | 0.009185 | 56.94  | 2.23E-06 | 3 | 2494.1896 | -0.8708  | 21.51729 | 1 |
| 15610329 |           | 0 | 0 | 0.0131   | 55.55  | 4.74E-06 | 2 | 1239.7222 | 1.076263 | 36.02072 | 0 |
| 15610329 |           | 0 | 0 | 0.1075   | 55.16  | 4.42E-06 | 2 | 1255.606  | -0.4991  | 25.73459 | 0 |
| 15610329 |           | 0 | 0 | 0.006976 | 54.99  | 7.77E-06 | 3 | 2102.0874 | -0.16452 | 28.00125 | 1 |
| 15610329 |           | 0 | 0 | 0.01739  | 48.54  | 2.8E-05  | 3 | 2400.2907 | -0.64021 | 35.41858 | 1 |
| 15610329 |           | 0 | 0 | 0.0279   | 47.43  | 1.99E-05 | 2 | 1677.7861 | -2.82096 | 35.75348 | 0 |
| 15610329 |           | 0 | 0 | 0.02613  | 47.41  | 3.63E-05 | 3 | 1800.8774 | 0.107294 | 25.45756 | 1 |
| 15610329 |           | 0 | 0 | 0.07111  | 47.05  | 2.37E-05 | 2 | 1125.6064 | 1.0568   | 23.84594 | 1 |
| 15610329 |           | 0 | 0 | 0.02031  | 46.86  | 4.12E-05 | 3 | 1482.7653 | -0.49831 | 24.82103 | 1 |

|          |           |   |   |          |        |          |   |           |          |          |   |
|----------|-----------|---|---|----------|--------|----------|---|-----------|----------|----------|---|
| 15610329 | N-Term(A  | 0 | 0 | 0.03304  | 46.1   | 4.17E-05 | 2 | 1281.7356 | 3.274468 | 44.23871 | 0 |
| 15610329 |           | 0 | 0 | 0.1417   | 44.66  | 7.01E-05 | 2 | 793.41985 | -0.58468 | 17.19827 | 0 |
| 15610329 | N-Term(A  | 0 | 0 | 0.01908  | 44.09  | 5.46E-05 | 2 | 1514.7465 | -1.37234 | 31.79057 | 0 |
| 15610329 |           | 0 | 0 | 0.04302  | 39.17  | 0.000121 | 2 | 1508.9054 | -0.41632 | 36.82449 | 1 |
| 15610329 |           | 0 | 0 | 0.2151   | 36.63  | 0.000532 | 2 | 1442.7522 | 1.589715 | 23.68268 | 1 |
| 15610329 |           | 0 | 0 | 0.06565  | 35.7   | 0.000269 | 3 | 4011.9096 | -0.98213 | 42.90689 | 0 |
| 15610329 |           | 0 | 0 | 0.1926   | 31.12  | 0.000771 | 2 | 971.43248 | -0.07167 | 19.27895 | 0 |
| 15610329 |           | 0 | 0 | 0.2668   | 30.26  | 0.001413 | 2 | 911.45018 | -0.8332  | 27.21688 | 0 |
| 15610329 |           | 0 | 0 | 0.1161   | 26.96  | 0.005135 | 3 | 1229.6739 | -0.91815 | 21.61722 | 1 |
| 15610329 |           | 0 | 0 | 0.1546   | 25.43  | 0.005442 | 2 | 2167.1043 | 1.801642 | 29.73812 | 2 |
| 15610329 | N-Term(A  | 0 | 0 | 0.3457   | 12.33  | 0.070175 | 3 | 2469.1924 | -0.37232 | 37.307   | 0 |
| 15607225 | M1(Oxidat | 0 | 0 | 0.08438  | 92.51  | 5.6E-10  | 2 | 1658.7847 | 0.222613 | 27.37134 | 0 |
| 15607225 | C6(Carban | 0 | 0 | 0.1435   | 84.38  | 8.21E-09 | 2 | 1542.8139 | 2.654288 | 36.50144 | 0 |
| 15607225 |           | 0 | 0 | 0.06669  | 83.62  | 7.17E-09 | 2 | 1642.7907 | 0.770465 | 28.94656 | 0 |
| 15607225 | M12(Oxid: | 0 | 0 | 0.1323   | 80.1   | 1.61E-08 | 2 | 1789.9886 | 0.227202 | 37.81664 | 0 |
| 15607225 |           | 0 | 0 | 0.1365   | 73.98  | 8.8E-08  | 3 | 2357.1714 | -0.79351 | 28.73437 | 0 |
| 15607225 | N-Term(A  | 0 | 0 | 0.2243   | 59.31  | 2.58E-06 | 2 | 1115.5679 | -1.13629 | 29.50116 | 0 |
| 15607225 |           | 0 | 0 | 0.1961   | 52.63  | 1.15E-05 | 2 | 1073.5583 | -0.32244 | 20.62882 | 0 |
| 15607225 |           | 0 | 0 | 0.3637   | 40.24  | 0.000175 | 2 | 1606.8547 | -0.093   | 26.32085 | 1 |
| 15607225 | M12(Oxid: | 0 | 0 | 0.1749   | 30.19  | 0.000955 | 3 | 1946.0905 | 0.617625 | 35.80665 | 1 |
| 15607225 |           | 0 | 0 | 0.2594   | 26.61  | 0.002401 | 3 | 1930.0938 | -0.27258 | 47.38637 | 1 |
| 15607225 |           | 0 | 0 | 0.1431   | 19.03  | 0.021254 | 3 | 1202.5987 | 0.005141 | 20.61436 | 1 |
| 15607234 | M2(Oxidat | 0 | 0 | 0.02244  | 122.4  | 1.18E-12 | 2 | 1833.8996 | -0.88476 | 26.91472 | 0 |
| 15607234 |           | 0 | 0 | 0.009825 | 118.52 | 4.08E-12 | 2 | 1483.8478 | -0.09124 | 40.04091 | 0 |
| 15607234 | N-Term(A  | 0 | 0 | 0.01844  | 113.91 | 7.52E-12 | 2 | 1859.9164 | -0.22951 | 28.25323 | 0 |
| 15607234 | M6(Oxidat | 0 | 0 | 0.03115  | 112.17 | 1.21E-11 | 2 | 1864.9333 | -0.13468 | 23.72414 | 0 |
| 15607234 |           | 0 | 0 | 0.02366  | 109.62 | 1.86E-11 | 2 | 1817.9064 | 0.070614 | 28.2813  | 0 |
| 15607234 |           | 0 | 0 | 0.04362  | 92.12  | 1.1E-09  | 2 | 1780.9454 | 0.740505 | 26.76794 | 1 |
| 15607234 |           | 0 | 0 | 0.07609  | 88.43  | 2.01E-09 | 2 | 1546.8593 | 0.290413 | 37.27947 | 0 |
| 15607234 |           | 0 | 0 | 0.04699  | 86.93  | 3.95E-09 | 2 | 1567.8583 | 0.295094 | 41.26927 | 0 |
| 15607234 |           | 0 | 0 | 0.01786  | 76.21  | 2.39E-08 | 3 | 3011.6852 | -1.2473  | 46.48889 | 1 |
| 15607234 | M5(Oxidat | 0 | 0 | 0.2053   | 75.28  | 4.74E-08 | 2 | 919.46532 | -1.444   | 20.63077 | 0 |
| 15607234 |           | 0 | 0 | 0.03858  | 63.63  | 4.32E-07 | 3 | 2520.394  | 0.763685 | 43.98172 | 1 |
| 15607234 |           | 0 | 0 | 0.08468  | 62     | 1.42E-06 | 2 | 903.47099 | -0.81512 | 24.33313 | 0 |
| 15607234 |           | 0 | 0 | 0.03022  | 61.75  | 1.24E-06 | 3 | 1848.934  | -2.49722 | 26.60958 | 0 |
| 15607234 |           | 0 | 0 | 0.2237   | 60.9   | 1.75E-06 | 2 | 901.47173 | -2.33398 | 21.28142 | 0 |

|          |           |   |   |          |        |          |   |           |          |          |   |
|----------|-----------|---|---|----------|--------|----------|---|-----------|----------|----------|---|
| 15607234 |           | 0 | 0 | 0.09789  | 59.05  | 1.74E-06 | 2 | 993.52458 | -0.61153 | 23.92202 | 0 |
| 15607234 | M5(Oxidat | 0 | 0 | 0.1348   | 56.05  | 6.08E-06 | 3 | 2160.1073 | -0.2747  | 26.13473 | 1 |
| 15607234 |           | 0 | 0 | 0.09772  | 55.5   | 3.1E-06  | 3 | 2791.521  | 0.311281 | 42.58352 | 2 |
| 15607234 |           | 0 | 0 | 0.3052   | 54.93  | 8.03E-06 | 2 | 971.55297 | 0.919949 | 26.15488 | 0 |
| 15607234 | M8(Oxidat | 0 | 0 | 0.1271   | 54.06  | 8.25E-06 | 4 | 2136.0585 | -1.4531  | 23.37862 | 1 |
| 15607234 |           | 0 | 0 | 0.2512   | 51.89  | 1.55E-05 | 2 | 819.43163 | -0.39553 | 12.93409 | 0 |
| 15607234 |           | 0 | 0 | 0.2942   | 51.49  | 1.31E-05 | 2 | 1227.6819 | 1.173809 | 24.6298  | 1 |
| 15607234 | M5(Oxidat | 0 | 0 | 0.2716   | 45.11  | 4.78E-05 | 3 | 2384.3001 | 1.416649 | 40.15316 | 1 |
| 15607234 | N-Term(A  | 0 | 0 | 0.1866   | 30.32  | 0.001486 | 3 | 1906.9438 | -0.14186 | 26.97361 | 0 |
| 15607234 |           | 0 | 0 | 0.3115   | 28.96  | 0.003494 | 3 | 1317.6902 | -0.65426 | 25.02123 | 1 |
| 15607234 |           | 0 | 0 | 0.2274   | 24.76  | 0.006684 | 2 | 1313.7275 | -0.78914 | 17.07382 | 1 |
| 15607317 |           | 0 | 0 | 0.1144   | 73.03  | 9.21E-08 | 2 | 2015.0834 | 1.265616 | 33.42058 | 1 |
| 15607317 | M8(Oxidat | 0 | 0 | 0.1935   | 69.47  | 3.22E-07 | 2 | 1272.6988 | 0.519972 | 22.40788 | 0 |
| 15607317 | N-Term(A  | 0 | 0 | 0.1784   | 65.26  | 6.55E-07 | 2 | 1631.8508 | 0.434664 | 26.77303 | 0 |
| 15607317 |           | 0 | 0 | 0.2276   | 63.59  | 8.31E-07 | 3 | 3128.5235 | 1.73289  | 47.43148 | 0 |
| 15607317 | M30(Oxid: | 0 | 0 | 0.2143   | 62.07  | 6.19E-07 | 4 | 3769.8429 | 3.045197 | 41.02542 | 1 |
| 15607317 | M26(Oxid: | 0 | 0 | 0.1183   | 61.54  | 7E-07    | 4 | 3785.8346 | 2.182909 | 39.96786 | 1 |
| 15607317 |           | 0 | 0 | 0.3034   | 60.33  | 2.13E-06 | 2 | 1256.7023 | -0.70279 | 29.2791  | 0 |
| 15607317 |           | 0 | 0 | 0.07763  | 59.85  | 1.45E-06 | 3 | 3753.8371 | 0.162506 | 43.4635  | 1 |
| 15607317 | M12(Oxid: | 0 | 0 | 0.1153   | 57.13  | 4.07E-06 | 3 | 1799.958  | -0.31353 | 29.71352 | 1 |
| 15607317 | M20(Oxid: | 0 | 0 | 0.1446   | 55.29  | 4.44E-06 | 3 | 3144.513  | 0.002652 | 42.60554 | 0 |
| 15607317 |           | 0 | 0 | 0.2254   | 54.41  | 6.7E-06  | 2 | 1732.9133 | 0.920015 | 33.18016 | 0 |
| 15607317 |           | 0 | 0 | 0.2597   | 53.34  | 1.02E-05 | 2 | 1589.844  | 2.868482 | 23.36466 | 0 |
| 15607317 |           | 0 | 0 | 0.1885   | 52.01  | 1.35E-05 | 2 | 1783.9637 | -0.01158 | 33.60315 | 1 |
| 15607317 | M20(Oxid: | 0 | 0 | 0.3133   | 45.1   | 4.17E-05 | 3 | 3160.5044 | -1.13072 | 42.2424  | 0 |
| 15607317 | M20(Oxid: | 0 | 0 | 0.212    | 39.94  | 0.000122 | 3 | 3894.8965 | 1.569026 | 40.53421 | 1 |
| 15607317 |           | 0 | 0 | 0.3554   | 38.66  | 0.00032  | 3 | 2280.1507 | -0.03613 | 34.26965 | 1 |
| 15607317 |           | 0 | 0 | 0.1772   | 37.66  | 0.000171 | 4 | 4504.2165 | 0.579473 | 40.87104 | 2 |
| 15607317 |           | 0 | 0 | 0.2253   | 36.78  | 0.000441 | 4 | 2215.1623 | 1.968637 | 23.44283 | 1 |
| 15607317 |           | 0 | 0 | 0.1697   | 35.01  | 0.000347 | 3 | 3878.904  | 2.215716 | 42.81894 | 1 |
| 15607317 |           | 0 | 0 | 0.3221   | 31.54  | 0.000737 | 2 | 866.47276 | -0.3421  | 16.48914 | 0 |
| 15607317 |           | 0 | 0 | 0.266    | 24.93  | 0.00707  | 4 | 2233.1688 | 0.175826 | 24.31601 | 1 |
| 15607317 |           | 0 | 0 | 0.1962   | 22.95  | 0.006591 | 4 | 2460.3148 | 3.312073 | 23.90027 | 2 |
| 15607317 |           | 0 | 0 | 0.2641   | 21     | 0.011518 | 4 | 2858.4862 | -0.22198 | 25.09406 | 2 |
| 15607317 |           | 0 | 0 | 0.2578   | 12.15  | 0.060809 | 4 | 4726.338  | -2.6697  | 41.94914 | 2 |
| 15607341 | M12(Oxid: | 0 | 0 | 5.41E-16 | 118.38 | 2.18E-12 | 3 | 3058.4894 | -0.2136  | 30.87509 | 1 |

|          |           |   |   |          |        |          |   |           |          |          |   |
|----------|-----------|---|---|----------|--------|----------|---|-----------|----------|----------|---|
| 15607341 |           | 0 | 0 | 5.41E-16 | 98.91  | 1.28E-10 | 3 | 2720.5446 | 0.988227 | 40.47234 | 1 |
| 15607341 |           | 0 | 0 | 5.41E-16 | 97.38  | 4.2E-10  | 2 | 2684.3392 | 1.552571 | 35.14304 | 0 |
| 15607341 |           | 0 | 0 | 5.41E-16 | 94.81  | 6.94E-10 | 3 | 3042.4951 | -0.00033 | 38.30741 | 1 |
| 15607341 |           | 0 | 0 | 5.41E-16 | 90.58  | 8.73E-10 | 3 | 2564.4426 | 0.709226 | 41.92978 | 0 |
| 15607341 |           | 0 | 0 | 3.67E-08 | 87.15  | 3.08E-09 | 2 | 1597.8709 | 0.717147 | 43.6329  | 0 |
| 15607341 | M9(Oxidat | 0 | 0 | 5.41E-16 | 86.91  | 3.97E-09 | 3 | 2700.331  | 0.415321 | 30.24596 | 0 |
| 15607341 | N-Term(A  | 0 | 0 | 1.09E-06 | 83.21  | 7.4E-09  | 2 | 1639.8807 | 0.211316 | 41.98582 | 0 |
| 15607341 |           | 0 | 0 | 0.000213 | 68.27  | 2.46E-07 | 3 | 3574.7347 | 0.056795 | 40.04972 | 2 |
| 15607341 |           | 0 | 0 | 8.99E-15 | 66.72  | 3.72E-07 | 2 | 1526.7923 | 0.047568 | 20.48081 | 0 |
| 15607341 | N-Term(A  | 0 | 0 | 2.15E-15 | 64.2   | 3.79E-07 | 3 | 2606.453  | 0.648691 | 46.61952 | 0 |
| 15607341 |           | 0 | 0 | 3.46E-11 | 59.58  | 1.38E-06 | 2 | 1416.6807 | 3.077872 | 24.01549 | 0 |
| 15607341 | M4(Oxidat | 0 | 0 | 3.16E-07 | 57.21  | 2E-06    | 2 | 1432.6724 | 0.798913 | 21.30045 | 0 |
| 15607341 | N-Term(A  | 0 | 0 | 3.92E-11 | 52.74  | 1.2E-05  | 4 | 2726.3483 | 1.001709 | 44.06004 | 0 |
| 15607341 | N-Term(A  | 0 | 0 | 1.32E-05 | 51.38  | 1.16E-05 | 3 | 2742.3438 | 1.230293 | 36.6945  | 0 |
| 15607341 |           | 0 | 0 | 0.001343 | 50.44  | 1.27E-05 | 2 | 1753.9718 | 0.557624 | 35.68109 | 1 |
| 15607341 | M4(Oxidat | 0 | 0 | 5.23E-05 | 40.9   | 8.11E-05 | 2 | 1448.668  | 1.266714 | 18.24836 | 0 |
| 15607341 | N-Term(A  | 0 | 0 | 2.92E-07 | 37.42  | 0.000308 | 2 | 1568.801  | -1.16355 | 19.50494 | 0 |
| 15607341 |           | 0 | 0 | 0.000132 | 31.3   | 0.001001 | 2 | 1867.0166 | 1.139712 | 20.99817 | 1 |
| 15607341 | M16(Oxid  | 0 | 0 | 0.00109  | 29.46  | 0.001699 | 4 | 3590.7326 | 0.874014 | 33.32487 | 2 |
| 15607341 |           | 0 | 0 | 1.68E-06 | 23.45  | 0.004508 | 2 | 901.58373 | 0.837968 | 20.6416  | 1 |
| 15607347 |           | 0 | 0 | 0.000142 | 120.49 | 8.91E-13 | 3 | 3171.472  | -0.22144 | 28.5406  | 1 |
| 15607347 |           | 0 | 0 | 0.000171 | 94.42  | 3.61E-10 | 2 | 2900.3465 | 0.631595 | 29.69615 | 0 |
| 15607347 |           | 0 | 0 | 0.000263 | 83.06  | 1.06E-08 | 2 | 2025.0987 | 0.532868 | 36.68947 | 0 |
| 15607347 |           | 0 | 0 | 0.03074  | 71.92  | 1.09E-07 | 2 | 2029.9881 | 0.060793 | 34.45768 | 0 |
| 15607347 |           | 0 | 0 | 0.02388  | 67.67  | 1.71E-07 | 2 | 1151.5351 | -0.95483 | 14.49072 | 0 |
| 15607347 |           | 0 | 0 | 0.02058  | 67.47  | 3.04E-07 | 2 | 1395.7741 | -0.2048  | 27.21187 | 0 |
| 15607347 |           | 0 | 0 | 0.06466  | 61.56  | 9.43E-07 | 3 | 2855.4236 | 0.380259 | 35.49968 | 1 |
| 15607347 |           | 0 | 0 | 0.01161  | 56.39  | 4.82E-06 | 3 | 1666.9034 | 0.541822 | 26.81066 | 1 |
| 15607347 | N-Term(A  | 0 | 0 | 0.2546   | 46.96  | 3.73E-05 | 3 | 2072.0053 | 3.290489 | 38.1708  | 0 |
| 15607347 |           | 0 | 0 | 0.1762   | 36.93  | 0.000568 | 2 | 844.45281 | 0.538914 | 16.77363 | 0 |
| 15607347 |           | 0 | 0 | 0.2721   | 36.86  | 0.000206 | 2 | 883.4998  | 0.183541 | 20.74863 | 0 |
| 15607347 | N-Term(A  | 0 | 0 | 0.1325   | 28.45  | 0.002715 | 3 | 2737.4619 | -4.13124 | 40.5469  | 1 |
| 15607347 |           | 0 | 0 | 0.1837   | 28.3   | 0.004511 | 2 | 972.54686 | -0.47271 | 19.91754 | 1 |
| 15607347 |           | 0 | 0 | 0.26     | 17.25  | 0.029197 | 2 | 2181.1993 | 0.249885 | 35.6276  | 1 |
| 15607424 | C14(Carba | 0 | 0 | 5.05E-16 | 96.57  | 2.2E-10  | 2 | 2437.0911 | 1.607142 | 27.27943 | 0 |
| 15607424 |           | 0 | 0 | 5.05E-16 | 91.93  | 1.86E-09 | 2 | 1911.9776 | 0.217242 | 40.65932 | 0 |



|          |           |   |   |          |        |          |   |           |          |          |   |
|----------|-----------|---|---|----------|--------|----------|---|-----------|----------|----------|---|
| 15607424 |           | 0 | 0 | 1.17E-11 | 84.32  | 5.18E-09 | 2 | 1461.6967 | -0.14943 | 21.7238  | 0 |
| 15607424 | N-Term(A  | 0 | 0 | 5.05E-16 | 83.32  | 1.07E-08 | 2 | 2371.2259 | 0.224094 | 40.81419 | 0 |
| 15607424 |           | 0 | 0 | 7.17E-14 | 83.05  | 1.09E-08 | 3 | 2485.3196 | 1.493945 | 34.49312 | 1 |
| 15607424 | M1(Oxidat | 0 | 0 | 4.84E-05 | 82.97  | 5.03E-09 | 2 | 2453.0921 | 4.067648 | 28.25989 | 0 |
| 15607424 |           | 0 | 0 | 5.05E-16 | 80.78  | 1.84E-08 | 2 | 2329.2161 | 0.57133  | 32.47422 | 0 |
| 15607424 |           | 0 | 0 | 5.05E-16 | 77.67  | 5.22E-08 | 2 | 1461.7601 | 1.105561 | 28.82243 | 0 |
| 15607424 |           | 0 | 0 | 5.05E-16 | 76.76  | 4.22E-08 | 2 | 1193.6641 | 0.283831 | 28.61867 | 0 |
| 15607424 |           | 0 | 0 | 1.26E-13 | 76.58  | 4.84E-08 | 3 | 3382.6717 | 0.385715 | 42.01711 | 0 |
| 15607424 |           | 0 | 0 | 2.34E-15 | 74.57  | 4.36E-08 | 2 | 1633.9025 | 0.25223  | 27.52971 | 0 |
| 15607424 |           | 0 | 0 | 1.2E-05  | 74.24  | 3.76E-08 | 2 | 880.48863 | -0.09912 | 19.88697 | 0 |
| 15607424 | N-Term(A  | 0 | 0 | 5.05E-16 | 73.77  | 8.61E-08 | 2 | 1953.9867 | -0.50889 | 33.22731 | 0 |
| 15607424 |           | 0 | 0 | 2.38E-13 | 62.7   | 9.94E-07 | 2 | 1354.7725 | 2.610945 | 23.87368 | 1 |
| 15607424 | N-Term(A  | 0 | 0 | 1.22E-14 | 62.47  | 1.1E-06  | 2 | 1675.9114 | -0.74094 | 32.90946 | 0 |
| 15607424 |           | 0 | 0 | 2.57E-05 | 57.17  | 4.41E-06 | 3 | 1617.8573 | -1.41445 | 26.82354 | 1 |
| 15607424 |           | 0 | 0 | 1.55E-07 | 54.21  | 5.31E-06 | 2 | 2609.3851 | 0.558011 | 39.61384 | 1 |
| 15607424 | N-Term(A  | 0 | 0 | 7.04E-09 | 51.12  | 1.04E-05 | 2 | 1429.6799 | -1.43328 | 21.39627 | 0 |
| 15607424 |           | 0 | 0 | 3.51E-06 | 49.79  | 1.47E-05 | 2 | 1387.6695 | -1.34045 | 19.24455 | 0 |
| 15607424 | N-Term(A  | 0 | 0 | 3.56E-06 | 42.37  | 8.69E-05 | 2 | 1235.6725 | -1.45941 | 29.1169  | 0 |
| 15607424 |           | 0 | 0 | 3.46E-05 | 40.6   | 8.69E-05 | 2 | 1366.842  | 0.172108 | 22.65745 | 0 |
| 15607424 | N-Term(A  | 0 | 0 | 3.15E-06 | 40.49  | 0.000197 | 3 | 2876.4664 | 0.458021 | 30.84573 | 0 |
| 15607424 |           | 0 | 0 | 3.68E-14 | 40.27  | 0.000183 | 3 | 2453.286  | 1.45258  | 41.84661 | 0 |
| 15607424 |           | 0 | 0 | 0.09942  | 37.79  | 0.000258 | 2 | 1092.5317 | -0.36382 | 24.47976 | 0 |
| 15607424 |           | 0 | 0 | 9.32E-05 | 36.27  | 0.00059  | 3 | 2834.4561 | 0.574563 | 25.69323 | 0 |
| 15607424 |           | 0 | 0 | 6.86E-10 | 21.56  | 0.006966 | 5 | 4484.4566 | 1.877588 | 48.27348 | 0 |
| 15607453 | M24(Oxid: | 0 | 0 | 5.49E-16 | 109.67 | 1.94E-11 | 3 | 3381.7203 | -0.14971 | 37.45438 | 0 |
| 15607453 |           | 0 | 0 | 5.49E-16 | 99.49  | 2.25E-10 | 3 | 3365.7304 | 1.349058 | 39.13451 | 0 |
| 15607453 |           | 0 | 0 | 5.49E-16 | 94.84  | 4.1E-10  | 2 | 1804.8536 | 1.895956 | 49.62737 | 0 |
| 15607453 | C12(Carba | 0 | 0 | 5.49E-16 | 94.75  | 3.34E-10 | 2 | 1891.7393 | 0.95685  | 26.86827 | 0 |
| 15607453 |           | 0 | 0 | 5.49E-16 | 93.7   | 7.25E-10 | 3 | 3622.8746 | -0.02605 | 39.43347 | 1 |
| 15607453 | N-Term(A  | 0 | 0 | 5.49E-16 | 75.81  | 5.38E-08 | 2 | 2380.2593 | 0.169999 | 37.75288 | 0 |
| 15607453 | C12(Carba | 0 | 0 | 5.49E-16 | 72.6   | 5.48E-08 | 2 | 1907.732  | -0.22493 | 25.38309 | 0 |
| 15607453 | M26(Oxid: | 0 | 0 | 5.49E-16 | 68.55  | 2.3E-07  | 3 | 3638.8619 | -2.11734 | 37.91493 | 1 |
| 15607453 | C11(Carba | 0 | 0 | 5.49E-16 | 65.58  | 4.15E-07 | 3 | 2338.2504 | 0.874613 | 36.90312 | 0 |
| 15607453 | C11(Carba | 0 | 0 | 1.25E-14 | 63.59  | 1.01E-06 | 3 | 2354.2359 | -3.1417  | 43.84159 | 0 |
| 15607453 | C28(Carba | 0 | 0 | 5.49E-16 | 62.77  | 5.27E-07 | 3 | 3677.5634 | -1.7255  | 34.53638 | 1 |
| 15607453 | C28(Carba | 0 | 0 | 1.03E-14 | 58.39  | 1.45E-06 | 3 | 3693.5705 | 1.575564 | 32.85303 | 1 |

|          |           |   |   |          |       |          |   |           |          |          |   |
|----------|-----------|---|---|----------|-------|----------|---|-----------|----------|----------|---|
| 15607453 | C11(Carba | 0 | 0 | 5.49E-16 | 54.25 | 6.77E-06 | 3 | 2737.4363 | 0.451924 | 32.3613  | 1 |
| 15607453 | C11(Carba | 0 | 0 | 4.58E-13 | 50.55 | 1.98E-05 | 4 | 2753.4293 | -0.21366 | 28.91172 | 1 |
| 15607453 | C11(Carba | 0 | 0 | 2.87E-13 | 47.68 | 3.5E-05  | 4 | 3095.5934 | -0.55266 | 31.26226 | 2 |
| 15607453 |           | 0 | 0 | 1.66E-10 | 46.88 | 3.59E-05 | 2 | 1434.7854 | 0.109208 | 24.64057 | 1 |
| 15607453 | N-Term(A  | 0 | 0 | 2.31E-10 | 42.63 | 5.44E-05 | 2 | 1933.7513 | 1.658953 | 28.77112 | 0 |
| 15607453 |           | 0 | 0 | 1.35E-05 | 40.81 | 8.28E-05 | 2 | 867.49376 | 0.31087  | 17.81164 | 0 |
| 15607453 |           | 0 | 0 | 0.04424  | 35.1  | 0.001004 | 2 | 760.40972 | -0.46782 | 15.12147 | 0 |
| 15607453 | C17(Carba | 0 | 0 | 0.09143  | 33.6  | 0.000589 | 3 | 3079.6435 | 0.955469 | 32.67607 | 1 |
| 15607453 | N-Term(A  | 0 | 0 | 0.1887   | 33.48 | 0.001099 | 2 | 802.41997 | -0.83102 | 24.42621 | 0 |
| 15607453 | C17(Carba | 0 | 0 | 0.000869 | 25.47 | 0.003547 | 5 | 3095.6364 | 0.297365 | 29.53143 | 1 |
| 15607453 | N-Term(A  | 0 | 0 | 0.1887   | 15.07 | 0.031117 | 2 | 1846.865  | 2.345344 | 31.88042 | 0 |
| 15607479 |           | 0 | 0 | 0.004771 | 88.13 | 3.85E-09 | 2 | 1515.7861 | 1.587982 | 30.85575 | 0 |
| 15607479 | C16(Carba | 0 | 0 | 0.000555 | 85.93 | 2.55E-09 | 2 | 2153.003  | 1.253127 | 31.7404  | 0 |
| 15607479 | C21(Carba | 0 | 0 | 4.3E-07  | 84.42 | 3.61E-09 | 3 | 2802.3301 | 0.072432 | 30.06412 | 1 |
| 15607479 | N-Term(A  | 0 | 0 | 1.05E-05 | 82.26 | 1.4E-08  | 2 | 1557.7966 | 1.502178 | 37.76307 | 0 |
| 15607479 | M2(Oxidat | 0 | 0 | 8.47E-05 | 80.46 | 8.97E-09 | 2 | 1533.6138 | 0.438722 | 24.65367 | 0 |
| 15607479 |           | 0 | 0 | 1.33E-05 | 78.63 | 1.85E-08 | 2 | 2164.0364 | 1.031984 | 43.53854 | 0 |
| 15607479 | M13(Oxid  | 0 | 0 | 0.005614 | 77.66 | 3.51E-08 | 2 | 1531.7781 | -0.2889  | 26.27233 | 0 |
| 15607479 | C17(Carba | 0 | 0 | 0.000129 | 67.4  | 3.91E-07 | 2 | 2430.2117 | -0.23363 | 30.77754 | 0 |
| 15607479 |           | 0 | 0 | 0.000874 | 63.33 | 4.63E-07 | 2 | 1201.5334 | -0.96419 | 18.3742  | 0 |
| 15607479 |           | 0 | 0 | 0.01051  | 60.43 | 1.49E-06 | 3 | 3496.7365 | 0.593148 | 48.17401 | 1 |
| 15607479 |           | 0 | 0 | 0.02358  | 59.08 | 1.24E-06 | 2 | 1105.5304 | -0.23355 | 18.97982 | 0 |
| 15607479 |           | 0 | 0 | 0.000162 | 57.98 | 1.59E-06 | 3 | 2369.0412 | 0.389011 | 16.32354 | 0 |
| 15607479 | C3(Carban | 0 | 0 | 0.01597  | 57.65 | 1.71E-06 | 2 | 1042.4183 | -1.06369 | 15.05768 | 0 |
| 15607479 |           | 0 | 0 | 0.002715 | 57.5  | 1.77E-06 | 2 | 1775.8335 | -0.36468 | 17.53708 | 1 |
| 15607479 |           | 0 | 0 | 0.03345  | 56.26 | 2.72E-06 | 2 | 1012.6145 | -0.52615 | 29.67148 | 0 |
| 15607479 |           | 0 | 0 | 0.000363 | 55.81 | 3.94E-06 | 3 | 3278.6605 | 0.718061 | 41.24972 | 0 |
| 15607479 | M2(Oxidat | 0 | 0 | 0.000911 | 52.3  | 5.87E-06 | 2 | 1791.8289 | -0.11233 | 16.39837 | 1 |
| 15607479 | M2(Oxidat | 0 | 0 | 0.01336  | 40.57 | 0.000114 | 2 | 1121.5248 | -0.703   | 17.26921 | 0 |
| 15607479 | M3(Oxidat | 0 | 0 | 0.06743  | 39.55 | 0.000111 | 2 | 1332.6152 | -2.74378 | 18.92379 | 1 |
| 15607479 |           | 0 | 0 | 0.07057  | 37.38 | 0.000192 | 2 | 1316.6247 | 0.592491 | 22.5268  | 1 |
| 15607479 | N-Term(A  | 0 | 0 | 0.01285  | 35.41 | 0.000287 | 2 | 1084.4311 | 1.054537 | 20.36538 | 0 |
| 15607479 |           | 0 | 0 | 0.02463  | 34.97 | 0.000621 | 2 | 859.50792 | 1.023648 | 30.48153 | 0 |
| 15607479 | M1(Oxidat | 0 | 0 | 0.04826  | 33.53 | 0.000443 | 2 | 1176.518  | 0.251279 | 22.41777 | 0 |
| 15607479 |           | 0 | 0 | 0.08106  | 31.54 | 0.001263 | 3 | 1995.0104 | 1.332739 | 26.59745 | 1 |
| 15607479 | N-Term(A  | 0 | 0 | 0.004274 | 30.34 | 0.002266 | 3 | 2020.0732 | 0.404921 | 29.3583  | 0 |

|          |           |   |   |          |        |          |   |           |          |          |   |
|----------|-----------|---|---|----------|--------|----------|---|-----------|----------|----------|---|
| 15607479 | N-Term(A  | 0 | 0 | 0.09313  | 29.23  | 0.001191 | 3 | 1817.8432 | -0.83696 | 20.96644 | 1 |
| 15607479 | M4(Oxidat | 0 | 0 | 0.03855  | 26.66  | 0.002481 | 2 | 875.49999 | -2.24984 | 25.57115 | 0 |
| 15607479 | M1(Oxidat | 0 | 0 | 0.08218  | 26.39  | 0.002291 | 3 | 1348.6118 | -1.46246 | 17.16973 | 1 |
| 15607479 | N-Term(A  | 0 | 0 | 0.0911   | 13.96  | 0.098439 | 3 | 3320.6869 | 5.467684 | 44.38759 | 0 |
| 15607503 |           | 0 | 0 | 0.01345  | 83.29  | 5.86E-09 | 2 | 2615.2569 | -0.11386 | 37.65024 | 0 |
| 15607503 |           | 0 | 0 | 0.005924 | 82.57  | 1.19E-08 | 2 | 1740.9186 | 1.065759 | 42.64217 | 0 |
| 15607503 |           | 0 | 0 | 0.06163  | 81.62  | 1.03E-08 | 3 | 3982.9826 | 1.417991 | 42.08096 | 1 |
| 15607503 |           | 0 | 0 | 0.01445  | 76.25  | 5.1E-08  | 3 | 2312.1928 | 0.278052 | 45.04032 | 0 |
| 15607503 |           | 0 | 0 | 0.01661  | 66.45  | 5.55E-07 | 2 | 1386.7374 | -0.21562 | 31.63003 | 0 |
| 15607503 |           | 0 | 0 | 0.02     | 66.31  | 3.63E-07 | 4 | 4446.2741 | -2.05627 | 40.87973 | 2 |
| 15607503 |           | 0 | 0 | 0.1009   | 55.69  | 3.37E-06 | 2 | 1267.7638 | 1.388464 | 40.94766 | 0 |
| 15607503 | C9(Carban | 0 | 0 | 0.1213   | 55.18  | 5.61E-06 | 3 | 3793.886  | 0.926265 | 38.00215 | 0 |
| 15607503 | N-Term(A  | 0 | 0 | 0.09747  | 54.65  | 5.31E-06 | 2 | 1152.6376 | 0.359646 | 30.81792 | 0 |
| 15607503 |           | 0 | 0 | 0.03767  | 54.33  | 5.53E-06 | 2 | 1110.6268 | 0.1038   | 23.51063 | 0 |
| 15607503 | M8(Oxidat | 0 | 0 | 0.05253  | 54.14  | 6.17E-06 | 3 | 2497.2152 | -0.90789 | 28.26346 | 0 |
| 15607503 | C9(Carban | 0 | 0 | 0.1188   | 51.4   | 1.01E-05 | 3 | 3809.8733 | -1.07515 | 36.39718 | 0 |
| 15607503 |           | 0 | 0 | 0.1441   | 50.49  | 2.5E-05  | 2 | 1028.5678 | 0.131564 | 36.68821 | 0 |
| 15607503 |           | 0 | 0 | 0.1493   | 50.35  | 9.2E-06  | 2 | 921.55144 | -0.25186 | 18.88438 | 0 |
| 15607503 | N-Term(A  | 0 | 0 | 0.1198   | 48.19  | 1.9E-05  | 2 | 1309.7724 | -0.19838 | 48.3266  | 0 |
| 15607503 |           | 0 | 0 | 0.0225   | 46.94  | 5.16E-05 | 4 | 3247.6344 | -2.26047 | 44.39501 | 0 |
| 15607503 |           | 0 | 0 | 0.1604   | 44.69  | 3.39E-05 | 2 | 1423.8633 | 0.089579 | 36.23044 | 1 |
| 15607503 |           | 0 | 0 | 0.06186  | 43     | 0.000153 | 3 | 1471.7847 | -1.1545  | 22.24596 | 0 |
| 15607503 | N-Term(A  | 0 | 0 | 0.1123   | 34.64  | 0.00079  | 2 | 1428.7519 | 2.563324 | 33.76834 | 0 |
| 15607503 |           | 0 | 0 | 0.09191  | 33.5   | 0.000446 | 2 | 1838.0953 | 1.061502 | 42.51619 | 1 |
| 15607503 |           | 0 | 0 | 0.1014   | 33.19  | 0.001079 | 3 | 2465.232  | 1.763518 | 35.12923 | 0 |
| 15607503 | N-Term(A  | 0 | 0 | 0.1294   | 21.11  | 0.010455 | 4 | 3835.8957 | 0.688311 | 41.28431 | 0 |
| 15607503 | C9(Carban | 0 | 0 | 0.1775   | 19.3   | 0.020561 | 3 | 3825.8679 | -1.14543 | 35.11738 | 0 |
| 15607503 | M24(Oxid. | 0 | 0 | 0.3843   | 12.01  | 0.084983 | 4 | 4207.1471 | 9.158019 | 40.30105 | 1 |
| 15607503 |           | 0 | 0 | 0.3721   | 11.62  | 0.130844 | 4 | 4191.1173 | 0.873031 | 42.24882 | 1 |
| 15607553 |           | 0 | 0 | 5.17E-16 | 115.59 | 3.86E-12 | 3 | 3639.8075 | 0.045864 | 43.28705 | 1 |
| 15607553 | N-Term(A  | 0 | 0 | 5.17E-16 | 108.46 | 2.42E-11 | 2 | 1773.9712 | -1.89817 | 48.07084 | 0 |
| 15607553 |           | 0 | 0 | 5.17E-16 | 107.5  | 2.76E-11 | 2 | 1731.9644 | 0.208877 | 49.03442 | 0 |
| 15607553 |           | 0 | 0 | 7.66E-09 | 106.96 | 4.93E-11 | 2 | 1523.7701 | -0.00274 | 25.30392 | 0 |
| 15607553 |           | 0 | 0 | 1.68E-09 | 105.99 | 6.55E-11 | 2 | 1645.8763 | 0.393105 | 35.75004 | 0 |
| 15607553 | M17(Oxid. | 0 | 0 | 5.17E-16 | 97.51  | 3.55E-10 | 2 | 2765.3433 | 0.771339 | 31.84954 | 0 |
| 15607553 |           | 0 | 0 | 0.002931 | 95.34  | 6.14E-10 | 2 | 2749.3426 | -1.3401  | 38.25077 | 0 |

|          |           |   |   |          |        |          |   |           |          |          |   |
|----------|-----------|---|---|----------|--------|----------|---|-----------|----------|----------|---|
| 15607553 |           | 0 | 0 | 5.17E-16 | 87.45  | 4.41E-09 | 2 | 2153.1355 | 0.234238 | 33.18029 | 0 |
| 15607553 | N-Term(A) | 0 | 0 | 5.86E-10 | 87.23  | 4.83E-09 | 2 | 2195.1431 | -1.13537 | 44.26368 | 0 |
| 15607553 |           | 0 | 0 | 4E-08    | 82.96  | 1.19E-08 | 2 | 2564.3353 | -0.14375 | 38.54868 | 0 |
| 15607553 |           | 0 | 0 | 1.34E-14 | 82.57  | 1.27E-08 | 2 | 1792.9559 | 0.332884 | 46.27607 | 1 |
| 15607553 | N-Term(A) | 0 | 0 | 9.04E-14 | 80.16  | 2.31E-08 | 2 | 2791.3685 | 4.166237 | 39.77114 | 0 |
| 15607553 | N-Term(A) | 0 | 0 | 7.26E-07 | 71.72  | 1.45E-07 | 2 | 1834.9667 | 0.488349 | 34.43853 | 1 |
| 15607553 |           | 0 | 0 | 4.42E-11 | 68.36  | 2.19E-07 | 3 | 3419.8051 | -2.30785 | 39.64555 | 2 |
| 15607553 |           | 0 | 0 | 2.09E-11 | 67.38  | 3.02E-07 | 3 | 2187.1875 | -0.3055  | 39.99188 | 1 |
| 15607553 | M21(Oxid. | 0 | 0 | 3.28E-12 | 64.22  | 4.54E-07 | 3 | 3220.5538 | -3.56155 | 31.44517 | 1 |
| 15607553 | N-Term(A) | 0 | 0 | 3.76E-09 | 56.66  | 6.37E-06 | 2 | 1687.8813 | -2.91082 | 37.61891 | 0 |
| 15607553 | N-Term(A) | 0 | 0 | 1.51E-06 | 54.17  | 9.38E-06 | 2 | 1565.7798 | -0.51319 | 34.43595 | 0 |
| 15607553 |           | 0 | 0 | 0.005076 | 51.37  | 7.28E-06 | 2 | 909.47832 | -0.61818 | 15.80115 | 0 |
| 15607553 | N-Term(A) | 0 | 0 | 1.34E-08 | 39.24  | 0.000208 | 2 | 2807.3577 | 2.127379 | 33.94805 | 0 |
| 15607553 |           | 0 | 0 | 0.002913 | 28.08  | 0.002723 | 3 | 3204.5676 | -0.86165 | 37.17375 | 1 |
| 15607553 |           | 0 | 0 | 0.01188  | 27.07  | 0.002945 | 2 | 1279.675  | -0.31019 | 16.66474 | 1 |
| 15607572 |           | 0 | 0 | 0.001897 | 97.44  | 2.88E-10 | 2 | 1308.6548 | 0.398466 | 24.41657 | 0 |
| 15607572 |           | 0 | 0 | 0.002437 | 89.96  | 1.51E-09 | 3 | 1670.9167 | -1.10788 | 30.10825 | 1 |
| 15607572 | N-Term(A) | 0 | 0 | 0.1982   | 72.38  | 8.96E-08 | 2 | 1350.6641 | -0.56728 | 26.77621 | 0 |
| 15607572 |           | 0 | 0 | 0.008351 | 70.99  | 1.79E-07 | 3 | 1763.9022 | -0.78037 | 23.21074 | 1 |
| 15607572 |           | 0 | 0 | 0.01897  | 61.07  | 2.46E-06 | 2 | 929.5407  | -0.87601 | 30.31675 | 0 |
| 15607572 |           | 0 | 0 | 0.02989  | 49.59  | 2.31E-05 | 2 | 760.39409 | -0.98729 | 12.33868 | 0 |
| 15607572 |           | 0 | 0 | 0.1179   | 31.27  | 0.00112  | 2 | 1751.8674 | 0.100389 | 21.27611 | 1 |
| 15607638 |           | 0 | 0 | 0.000137 | 125.11 | 3.08E-13 | 2 | 1810.8322 | 0.353218 | 48.15344 | 0 |
| 15607638 |           | 0 | 0 | 0.003627 | 95.6   | 6.06E-10 | 2 | 2126.1453 | 0.009393 | 38.07154 | 1 |
| 15607638 |           | 0 | 0 | 0.006331 | 89.68  | 1.35E-09 | 3 | 3832.8838 | 1.542149 | 30.41105 | 1 |
| 15607638 |           | 0 | 0 | 0.02629  | 76.97  | 2.41E-08 | 3 | 2282.247  | 0.276977 | 36.71831 | 2 |
| 15607638 |           | 0 | 0 | 0.02248  | 76.91  | 2.24E-08 | 2 | 1099.6471 | 0.091871 | 33.40955 | 0 |
| 15607638 |           | 0 | 0 | 0.005446 | 76.08  | 6.66E-08 | 2 | 1970.044  | -0.09055 | 39.90096 | 0 |
| 15607638 |           | 0 | 0 | 0.02355  | 74.16  | 6.14E-08 | 2 | 2589.2759 | -1.2802  | 27.11381 | 0 |
| 15607638 |           | 0 | 0 | 0.004873 | 73.58  | 4.82E-08 | 3 | 1937.0952 | 1.268753 | 32.3378  | 1 |
| 15607638 |           | 0 | 0 | 0.008869 | 66.26  | 4.26E-07 | 3 | 2137.036  | -1.04698 | 19.5138  | 1 |
| 15607638 | N-Term(A) | 0 | 0 | 0.0262   | 63.45  | 8.13E-07 | 3 | 2631.2843 | -2.07898 | 29.7574  | 0 |
| 15607638 | N-Term(A) | 0 | 0 | 0.02072  | 61.19  | 1.33E-06 | 2 | 1141.6597 | 1.847545 | 38.67274 | 0 |
| 15607638 |           | 0 | 0 | 0.04155  | 59.92  | 1.02E-06 | 2 | 1499.6534 | -0.68909 | 19.68939 | 0 |
| 15607638 | M12(Oxid. | 0 | 0 | 0.0148   | 59.14  | 1.22E-06 | 3 | 4515.0685 | 2.50899  | 42.75134 | 0 |
| 15607638 |           | 0 | 0 | 0.006088 | 56.47  | 2.25E-06 | 3 | 4499.0709 | 1.930325 | 43.11242 | 0 |

|          |           |   |   |          |        |          |   |           |          |          |   |
|----------|-----------|---|---|----------|--------|----------|---|-----------|----------|----------|---|
| 15607638 |           | 0 | 0 | 0.08746  | 46.75  | 3.17E-05 | 2 | 1262.6165 | 0.040691 | 25.76808 | 0 |
| 15607638 | N-Term(A  | 0 | 0 | 0.1557   | 44.58  | 4.88E-05 | 2 | 1304.6271 | 0.081628 | 29.82055 | 0 |
| 15607638 |           | 0 | 0 | 0.1294   | 44.41  | 7.06E-05 | 2 | 1629.8226 | -0.38282 | 25.34402 | 0 |
| 15607638 | N-Term(A  | 0 | 0 | 0.07798  | 41.58  | 0.000136 | 2 | 1671.8332 | -0.34024 | 27.11606 | 0 |
| 15607638 |           | 0 | 0 | 0.1253   | 39.46  | 0.000113 | 2 | 1012.5641 | -0.62991 | 13.11869 | 1 |
| 15607638 | N-Term(A  | 0 | 0 | 0.0661   | 31.7   | 0.000676 | 2 | 898.47258 | -1.75244 | 16.48071 | 0 |
| 15607638 |           | 0 | 0 | 0.09618  | 31.53  | 0.001301 | 2 | 1785.9252 | 0.51357  | 22.72059 | 1 |
| 15607638 |           | 0 | 0 | 0.1852   | 27.65  | 0.00292  | 2 | 855.44542 | 2.618325 | 18.76734 | 1 |
| 15607638 | N-Term(A  | 0 | 0 | 0.2259   | 20.79  | 0.00917  | 6 | 4140.9772 | 1.248586 | 33.25235 | 1 |
| 15607816 | M1(Oxidat | 0 | 0 | 4.26E-16 | 128.57 | 1.39E-13 | 2 | 2078.9476 | -0.32658 | 29.84228 | 0 |
| 15607816 |           | 0 | 0 | 5.08E-13 | 89.3   | 1.17E-09 | 2 | 2062.9539 | 0.282954 | 31.74773 | 0 |
| 15607816 | M7(Oxidat | 0 | 0 | 7.79E-05 | 85.1   | 3.08E-09 | 2 | 1818.7824 | 0.203395 | 25.59455 | 0 |
| 15607816 | M1(Oxidat | 0 | 0 | 7.04E-10 | 84.98  | 3.17E-09 | 2 | 2094.9476 | 2.103186 | 25.53748 | 0 |
| 15607816 |           | 0 | 0 | 1.81E-07 | 83.59  | 4.81E-09 | 2 | 1934.9233 | -0.56639 | 28.57351 | 0 |
| 15607816 | M1(Oxidat | 0 | 0 | 9.5E-13  | 81.58  | 6.93E-09 | 2 | 1834.7798 | 1.575914 | 23.47538 | 0 |
| 15607816 |           | 0 | 0 | 4.37E-13 | 79.68  | 1.07E-08 | 2 | 1802.7864 | -0.38094 | 29.40068 | 0 |
| 15607816 |           | 0 | 0 | 1.74E-13 | 73.09  | 8.35E-08 | 2 | 1828.8987 | -1.31886 | 27.28505 | 0 |
| 15607816 |           | 0 | 0 | 1.6E-13  | 71.69  | 9.49E-08 | 2 | 1525.7748 | -0.66421 | 29.58582 | 0 |
| 15607816 | M10(Oxid. | 0 | 0 | 1.14E-05 | 63.8   | 7.3E-07  | 2 | 1844.8993 | 1.779659 | 23.41151 | 0 |
| 15607816 |           | 0 | 0 | 1.04E-13 | 62.63  | 5.44E-07 | 3 | 2698.2398 | -3.52491 | 28.09949 | 1 |
| 15607816 | M1(Oxidat | 0 | 0 | 0.001696 | 60.46  | 8.97E-07 | 2 | 1850.7726 | 0.418369 | 21.33746 | 0 |
| 15607816 |           | 0 | 0 | 1.95E-10 | 59.52  | 1.73E-06 | 2 | 1120.5995 | -0.19311 | 28.3879  | 0 |
| 15607816 |           | 0 | 0 | 1.25E-11 | 59.04  | 1.56E-06 | 2 | 1062.5944 | 0.11919  | 29.40312 | 0 |
| 15607816 |           | 0 | 0 | 4.49E-09 | 45.86  | 5.19E-05 | 2 | 1762.8648 | -0.71906 | 34.88412 | 0 |
| 15607826 |           | 0 | 0 | 0.004036 | 120.36 | 1.56E-12 | 2 | 1773.9712 | 0.365116 | 37.20862 | 0 |
| 15607826 |           | 0 | 0 | 0.00291  | 88.08  | 2.33E-09 | 2 | 1582.7815 | -0.32826 | 17.74376 | 0 |
| 15607826 | N-Term(A  | 0 | 0 | 0.01547  | 79.85  | 1.71E-08 | 2 | 1815.9797 | -0.82294 | 42.82296 | 0 |
| 15607826 |           | 0 | 0 | 0.01822  | 78.2   | 2.5E-08  | 2 | 2157.168  | -1.08242 | 40.07973 | 0 |
| 15607826 |           | 0 | 0 | 0.006259 | 76.06  | 6.32E-08 | 2 | 1990.9941 | -2.07693 | 29.27646 | 0 |
| 15607826 |           | 0 | 0 | 0.009337 | 71.99  | 1.64E-07 | 3 | 2009.9981 | -0.93494 | 17.36579 | 1 |
| 15607826 |           | 0 | 0 | 0.02291  | 71.64  | 6.85E-08 | 2 | 1296.6066 | -0.05886 | 17.64029 | 0 |
| 15607826 |           | 0 | 0 | 0.02976  | 61.79  | 9.93E-07 | 2 | 1452.7077 | -0.08405 | 17.09095 | 1 |
| 15607826 |           | 0 | 0 | 0.06863  | 61.16  | 7.64E-07 | 2 | 1470.8741 | -0.74124 | 26.7575  | 1 |
| 15607826 | N-Term(A  | 0 | 0 | 0.03635  | 60.27  | 1.74E-06 | 2 | 1624.7917 | -0.58637 | 20.82336 | 0 |
| 15607826 |           | 0 | 0 | 0.01438  | 58.5   | 2.47E-06 | 2 | 930.52544 | -0.08928 | 25.15304 | 0 |
| 15607826 |           | 0 | 0 | 0.2737   | 46.97  | 4.42E-05 | 2 | 773.43993 | -0.58612 | 29.55865 | 0 |

|          |           |   |   |          |        |          |   |           |          |          |   |
|----------|-----------|---|---|----------|--------|----------|---|-----------|----------|----------|---|
| 15607826 | N-Term(A  | 0 | 0 | 0.1534   | 33.4   | 0.00048  | 2 | 1125.6481 | -0.57515 | 20.67767 | 1 |
| 15607826 | M1(Oxidat | 0 | 0 | 0.2554   | 33.25  | 0.001136 | 2 | 1287.6845 | 0.49666  | 20.39746 | 1 |
| 15607826 |           | 0 | 0 | 0.3125   | 31.7   | 0.001859 | 2 | 1271.6897 | 0.631887 | 22.53408 | 1 |
| 15607826 |           | 0 | 0 | 0.2225   | 24.36  | 0.01136  | 2 | 929.54082 | -0.73393 | 26.36054 | 1 |
| 15607956 | C6(Carban | 0 | 0 | 4.95E-16 | 105.44 | 3.29E-11 | 3 | 2793.3085 | -0.88049 | 45.15551 | 0 |
| 15607956 |           | 0 | 0 | 4.95E-16 | 89.83  | 1.98E-09 | 2 | 1711.9139 | 0.692008 | 29.35642 | 0 |
| 15607956 | N-Term(A  | 0 | 0 | 4.95E-16 | 88.32  | 2.65E-09 | 2 | 1753.9252 | 1.124448 | 33.3487  | 0 |
| 15607956 | C7(Carban | 0 | 0 | 4.95E-16 | 88.13  | 2.08E-09 | 4 | 3105.5082 | -1.61194 | 48.16564 | 2 |
| 15607956 |           | 0 | 0 | 4.95E-16 | 85.37  | 5.08E-09 | 2 | 1880.0175 | 0.5438   | 47.05702 | 0 |
| 15607956 | C7(Carban | 0 | 0 | 4.95E-16 | 72.37  | 8.4E-08  | 3 | 2949.4136 | 0.516398 | 47.47549 | 1 |
| 15607956 |           | 0 | 0 | 4.95E-16 | 67.31  | 2.42E-07 | 3 | 2036.1198 | 1.072544 | 49.08601 | 1 |
| 15607956 | C6(Carban | 0 | 0 | 4.95E-16 | 67.03  | 2.87E-07 | 3 | 2949.4085 | -1.2219  | 39.33495 | 1 |
| 15607956 |           | 0 | 0 | 4.95E-16 | 64.84  | 3.77E-07 | 4 | 2320.2777 | 0.18505  | 40.56905 | 2 |
| 15607956 | C21(Carba | 0 | 0 | 4.95E-16 | 56.05  | 4.47E-06 | 2 | 2696.3099 | 2.430267 | 28.18406 | 1 |
| 15607956 |           | 0 | 0 | 4.33E-13 | 49.22  | 3.05E-05 | 2 | 1114.6203 | -1.14339 | 18.25895 | 1 |
| 15607956 |           | 0 | 0 | 4.5E-10  | 48.66  | 2.52E-05 | 2 | 1295.6587 | -0.26419 | 18.84985 | 0 |
| 15607956 |           | 0 | 0 | 1.82E-11 | 40.91  | 0.000118 | 3 | 2164.1757 | -0.22548 | 42.30079 | 1 |
| 15607956 |           | 0 | 0 | 2.79E-06 | 40.19  | 0.000144 | 2 | 812.52379 | -0.33356 | 26.51008 | 0 |
| 15607956 | C4(Carban | 0 | 0 | 6.05E-12 | 39.77  | 0.000105 | 3 | 1258.5788 | 0.628265 | 14.31262 | 1 |
| 15607956 | C4(Carban | 0 | 0 | 2.48E-08 | 35.22  | 0.0003   | 2 | 1003.4077 | -0.76528 | 13.14319 | 0 |
| 15607956 |           | 0 | 0 | 4.03E-15 | 32.31  | 0.001175 | 3 | 2988.5528 | -0.38573 | 30.18801 | 1 |
| 15607956 | C21(Carba | 0 | 0 | 0.04976  | 25.78  | 0.00436  | 3 | 2951.4701 | -0.94306 | 27.85096 | 2 |
| 15607956 | N-Term(A  | 0 | 0 | 0.04222  | 21.02  | 0.018976 | 2 | 1337.6703 | 0.515362 | 20.36197 | 0 |
| 15608041 |           | 0 | 0 | 0.03958  | 74.16  | 5.95E-08 | 2 | 1342.676  | 0.655124 | 27.66711 | 0 |
| 15608041 |           | 0 | 0 | 0.03942  | 58.99  | 4.23E-06 | 2 | 1543.8262 | -0.37687 | 29.20482 | 0 |
| 15608041 |           | 0 | 0 | 0.06082  | 49.66  | 2.16E-05 | 3 | 2898.4879 | 1.182648 | 29.82767 | 0 |
| 15608041 |           | 0 | 0 | 0.2378   | 32.31  | 0.000705 | 2 | 924.47246 | -0.25051 | 33.03039 | 0 |
| 15608109 |           | 0 | 0 | 0.04586  | 78.94  | 3.19E-08 | 3 | 2334.221  | 0.351345 | 30.33104 | 0 |
| 15608109 | C2(Carban | 0 | 0 | 0.1998   | 60.06  | 1.68E-06 | 2 | 1336.6668 | -0.80024 | 28.77648 | 0 |
| 15608109 |           | 0 | 0 | 0.1557   | 54.19  | 5.72E-06 | 2 | 1597.7831 | 0.042154 | 19.82211 | 1 |
| 15608109 |           | 0 | 0 | 0.4266   | 28.3   | 0.003328 | 3 | 1287.7168 | -0.02351 | 22.11539 | 0 |
| 15608109 |           | 0 | 0 | 0.1971   | 23.67  | 0.004285 | 2 | 1188.5418 | 2.115488 | 18.85239 | 0 |
| 15608122 |           | 0 | 0 | 0.000232 | 126.77 | 4E-13    | 3 | 2879.4854 | 1.891119 | 45.31182 | 2 |
| 15608122 | M7(Oxidat | 0 | 0 | 0.01078  | 106.2  | 4.56E-11 | 2 | 1689.8321 | 1.253112 | 25.8282  | 0 |
| 15608122 |           | 0 | 0 | 0.02106  | 94.8   | 8.94E-10 | 2 | 1739.892  | -0.18158 | 26.13183 | 0 |
| 15608122 |           | 0 | 0 | 0.02302  | 86.29  | 3.76E-09 | 2 | 2282.1687 | 1.024232 | 34.65073 | 0 |

|          |           |   |   |          |       |          |   |           |          |          |   |
|----------|-----------|---|---|----------|-------|----------|---|-----------|----------|----------|---|
| 15608122 |           | 0 | 0 | 0.0102   | 79.18 | 2.42E-08 | 2 | 2567.2776 | -0.04901 | 49.72286 | 0 |
| 15608122 |           | 0 | 0 | 0.008731 | 76.09 | 5.78E-08 | 2 | 1657.8403 | 0.076159 | 35.11969 | 0 |
| 15608122 |           | 0 | 0 | 0.009143 | 76.08 | 4.69E-08 | 2 | 1434.7184 | 0.041881 | 19.61858 | 0 |
| 15608122 |           | 0 | 0 | 0.006046 | 75.49 | 5.23E-08 | 3 | 2673.3957 | 0.023466 | 27.92509 | 1 |
| 15608122 |           | 0 | 0 | 0.006483 | 73.97 | 1.5E-07  | 3 | 2723.3789 | -0.00071 | 47.25294 | 1 |
| 15608122 |           | 0 | 0 | 0.007699 | 73.5  | 4.46E-08 | 2 | 2009.9197 | -1.83886 | 27.60543 | 0 |
| 15608122 |           | 0 | 0 | 0.02304  | 72.67 | 7.03E-08 | 2 | 1207.6521 | 1.429143 | 36.5544  | 0 |
| 15608122 |           | 0 | 0 | 0.01829  | 69.24 | 2.14E-07 | 3 | 1900.9777 | 0.670174 | 32.02234 | 0 |
| 15608122 | M13(Oxid  | 0 | 0 | 0.05363  | 67.72 | 1.69E-07 | 2 | 2025.9227 | 2.13173  | 22.61738 | 0 |
| 15608122 |           | 0 | 0 | 0.07155  | 67.64 | 2.41E-07 | 2 | 1110.5903 | 0.005636 | 19.30541 | 0 |
| 15608122 | M7(Oxidat | 0 | 0 | 0.03083  | 64.68 | 7.32E-07 | 3 | 1673.835  | -0.03059 | 29.22314 | 0 |
| 15608122 |           | 0 | 0 | 0.03526  | 58.89 | 1.81E-06 | 2 | 2337.1287 | 0.397243 | 22.60154 | 1 |
| 15608122 |           | 0 | 0 | 0.1214   | 58.84 | 2.81E-06 | 2 | 1148.5966 | 0.51708  | 21.09952 | 0 |
| 15608122 | M8(Oxidat | 0 | 0 | 0.04388  | 57.14 | 3.77E-06 | 2 | 1223.6458 | 0.378583 | 31.42216 | 0 |
| 15608122 |           | 0 | 0 | 0.09451  | 55.62 | 2.74E-06 | 2 | 1195.7417 | 0.656929 | 32.2763  | 0 |
| 15608122 |           | 0 | 0 | 0.02664  | 54.41 | 3.61E-06 | 3 | 2382.4321 | -1.00287 | 41.87458 | 1 |
| 15608122 | M2(Oxidat | 0 | 0 | 0.06218  | 52.49 | 7.33E-06 | 3 | 1551.8428 | 0.19415  | 23.54398 | 1 |
| 15608122 |           | 0 | 0 | 0.04422  | 51.19 | 1.63E-05 | 3 | 2438.269  | 0.608951 | 32.28985 | 1 |
| 15608122 |           | 0 | 0 | 0.06401  | 50.17 | 1.78E-05 | 3 | 1465.7868 | -0.17974 | 19.71184 | 1 |
| 15608122 | M6(Oxidat | 0 | 0 | 0.09493  | 47.88 | 1.79E-05 | 2 | 1207.5801 | -0.75405 | 24.08827 | 0 |
| 15608122 |           | 0 | 0 | 0.08751  | 45.05 | 3.44E-05 | 2 | 1535.8486 | 0.629646 | 27.5201  | 1 |
| 15608122 | N-Term(A  | 0 | 0 | 0.2047   | 44.64 | 6.18E-05 | 2 | 1942.9852 | -0.94251 | 35.75165 | 0 |
| 15608122 |           | 0 | 0 | 0.2334   | 44.19 | 8.76E-05 | 2 | 1606.8028 | -0.2423  | 21.9055  | 1 |
| 15608122 |           | 0 | 0 | 0.05325  | 43.13 | 0.000119 | 3 | 1379.7473 | 0.591609 | 29.4557  | 0 |
| 15608122 |           | 0 | 0 | 0.4854   | 42.88 | 0.000149 | 2 | 789.40984 | -0.39734 | 13.00851 | 0 |
| 15608122 |           | 0 | 0 | 0.1342   | 42.22 | 0.000111 | 4 | 2227.1806 | -1.13085 | 30.76061 | 1 |
| 15608122 |           | 0 | 0 | 0.2267   | 41.41 | 0.000192 | 2 | 787.46654 | -0.91687 | 19.62087 | 0 |
| 15608122 | M6(Oxidat | 0 | 0 | 0.1933   | 31.79 | 0.001622 | 2 | 1244.6675 | 0.579888 | 19.797   | 1 |
| 15608122 |           | 0 | 0 | 0.3449   | 31.25 | 0.000748 | 3 | 1205.7123 | 0.782215 | 23.61164 | 0 |
| 15608122 | M1(Oxidat | 0 | 0 | 0.3733   | 29.14 | 0.001585 | 2 | 1395.7399 | -1.05359 | 25.39028 | 0 |
| 15608122 |           | 0 | 0 | 0.1559   | 28.94 | 0.002042 | 2 | 952.52098 | -0.13505 | 19.03981 | 0 |
| 15608122 |           | 0 | 0 | 0.4026   | 18.91 | 0.016066 | 3 | 1879.0395 | -0.11093 | 27.9741  | 1 |
| 15608255 |           | 0 | 0 | 0.0456   | 90.9  | 1.46E-09 | 2 | 1363.6615 | 1.030551 | 28.04891 | 0 |
| 15608255 |           | 0 | 0 | 0.004253 | 67.97 | 3.35E-07 | 2 | 933.47832 | -0.62371 | 15.99471 | 0 |
| 15608255 |           | 0 | 0 | 0.007555 | 65.6  | 2.75E-07 | 2 | 1079.6225 | 1.540189 | 32.60028 | 1 |
| 15608255 | M2(Oxidat | 0 | 0 | 0.06188  | 55.05 | 7.82E-06 | 2 | 2452.2466 | -0.43661 | 44.3838  | 0 |

|          |           |   |   |          |        |          |   |           |          |          |   |
|----------|-----------|---|---|----------|--------|----------|---|-----------|----------|----------|---|
| 15608255 |           | 0 | 0 | 0.1447   | 37.11  | 0.000194 | 2 | 923.52037 | 0.726574 | 33.24095 | 0 |
| 15608255 |           | 0 | 0 | 0.1447   | 32.33  | 0.000643 | 4 | 3841.9025 | 0.475084 | 39.22967 | 0 |
| 15608255 | M4(Oxidat | 0 | 0 | 0.07042  | 25.06  | 0.005614 | 3 | 2721.4341 | 0.450455 | 45.42835 | 1 |
| 15608272 | M8(Oxidat | 0 | 0 | 5.42E-16 | 90.6   | 2E-09    | 2 | 1542.8328 | 1.215278 | 30.94891 | 0 |
| 15608272 |           | 0 | 0 | 5.42E-16 | 88.27  | 1.49E-09 | 2 | 1260.7426 | 0.206235 | 27       | 0 |
| 15608272 |           | 0 | 0 | 5.42E-16 | 85.51  | 4.36E-09 | 2 | 1207.5953 | -0.12327 | 26.20841 | 0 |
| 15608272 | M2(Oxidat | 0 | 0 | 5.42E-16 | 85.39  | 2.88E-09 | 2 | 1909.787  | 0.041158 | 23.25005 | 0 |
| 15608272 |           | 0 | 0 | 5.42E-16 | 72.46  | 1.11E-07 | 2 | 1526.8384 | 1.575285 | 34.93653 | 0 |
| 15608272 |           | 0 | 0 | 5.42E-16 | 71.81  | 6.58E-08 | 2 | 1893.7914 | -0.32309 | 23.75763 | 0 |
| 15608272 |           | 0 | 0 | 5.42E-16 | 59.42  | 1.77E-06 | 2 | 1429.7295 | -0.12696 | 39.07327 | 0 |
| 15608272 | C2(Carban | 0 | 0 | 5.42E-16 | 59.07  | 1.24E-06 | 3 | 3055.4291 | 0.929821 | 32.49651 | 0 |
| 15608272 |           | 0 | 0 | 5.42E-16 | 57.03  | 2.38E-06 | 2 | 908.50212 | -0.18548 | 35.6783  | 0 |
| 15608272 | C1(Carban | 0 | 0 | 5.42E-16 | 55.93  | 2.55E-06 | 2 | 1049.4837 | 0.328616 | 22.92135 | 0 |
| 15608272 | M8(Oxidat | 0 | 0 | 1.75E-15 | 55.62  | 3.29E-06 | 2 | 1052.594  | 1.772231 | 27.43508 | 1 |
| 15608272 | C2(Carban | 0 | 0 | 0.1179   | 53.84  | 4.12E-06 | 3 | 3039.4149 | -5.41722 | 35.75398 | 0 |
| 15608272 |           | 0 | 0 | 3.53E-09 | 52.62  | 1.67E-05 | 2 | 928.536   | -0.38124 | 28.66019 | 0 |
| 15608272 | C1(Carban | 0 | 0 | 5.42E-16 | 48.96  | 2.86E-05 | 4 | 2291.204  | -1.6782  | 36.79632 | 1 |
| 15608272 | M5(Oxidat | 0 | 0 | 2.32E-10 | 46.76  | 3.48E-05 | 2 | 1445.7259 | 0.858653 | 37.09165 | 0 |
| 15608272 | M4(Oxidat | 0 | 0 | 0.003831 | 42.03  | 8.46E-05 | 2 | 2375.1416 | -1.40503 | 34.48662 | 1 |
| 15608272 |           | 0 | 0 | 5.42E-16 | 36.32  | 0.00028  | 3 | 2012.9679 | 0.317124 | 28.64394 | 1 |
| 15608272 | C19(Carba | 0 | 0 | 5.42E-16 | 36.21  | 0.000239 | 5 | 4914.2048 | -0.1453  | 37.62121 | 1 |
| 15608272 |           | 0 | 0 | 3.66E-15 | 35.57  | 0.000541 | 2 | 1682.8505 | 0.457656 | 28.20593 | 1 |
| 15608272 | M2(Oxidat | 0 | 0 | 5.42E-16 | 32.47  | 0.000565 | 5 | 4930.2052 | 0.960843 | 37.46495 | 1 |
| 15608272 | N-Term(A  | 0 | 0 | 5.42E-16 | 30.73  | 0.001141 | 2 | 1302.7535 | 0.429296 | 37.86877 | 0 |
| 15608272 |           | 0 | 0 | 1.48E-10 | 29.85  | 0.001967 | 3 | 2359.1506 | 0.227447 | 35.51491 | 1 |
| 15608272 |           | 0 | 0 | 1.63E-13 | 22.28  | 0.009169 | 4 | 2488.2189 | -1.09658 | 35.1052  | 2 |
| 15608458 |           | 0 | 0 | 5.55E-16 | 106.33 | 3.49E-11 | 2 | 1659.8173 | -0.72475 | 25.43297 | 0 |
| 15608458 |           | 0 | 0 | 1.91E-10 | 103.09 | 1.33E-10 | 2 | 1790.9294 | 0.545855 | 36.8848  | 0 |
| 15608458 | C8(Carban | 0 | 0 | 1.68E-09 | 80.93  | 2.74E-08 | 2 | 2681.357  | 2.624004 | 34.36428 | 0 |
| 15608458 | C13(Carba | 0 | 0 | 3.06E-09 | 75.53  | 5.32E-08 | 4 | 3207.6369 | 0.167172 | 35.69893 | 1 |
| 15608458 | M5(Oxidat | 0 | 0 | 0.002836 | 74.82  | 9.06E-08 | 2 | 2697.3421 | -1.02756 | 32.63732 | 0 |
| 15608458 | M5(Oxidat | 0 | 0 | 3.41E-09 | 74.28  | 7.28E-08 | 2 | 1051.5352 | -0.18302 | 27.10611 | 0 |
| 15608458 | N-Term(A  | 0 | 0 | 4.38E-05 | 66.52  | 5.35E-07 | 2 | 1093.5462 | 0.209298 | 31.16914 | 0 |
| 15608458 | M10(Oxid. | 0 | 0 | 4.69E-06 | 66.37  | 4.5E-07  | 3 | 3223.6307 | -0.16437 | 34.9216  | 1 |
| 15608458 |           | 0 | 0 | 0.00016  | 65.85  | 4.16E-07 | 2 | 1979.9749 | -3.69711 | 29.74624 | 1 |
| 15608458 |           | 0 | 0 | 0.000329 | 61.31  | 1.52E-06 | 2 | 1035.5416 | 1.033474 | 32.62378 | 0 |



|          |           |   |   |          |        |          |   |           |          |          |   |
|----------|-----------|---|---|----------|--------|----------|---|-----------|----------|----------|---|
| 15608458 |           | 0 | 0 | 0.001159 | 56.65  | 5.41E-06 | 2 | 1265.6706 | -0.3172  | 17.05501 | 1 |
| 15608458 |           | 0 | 0 | 2.43E-07 | 50.87  | 1.51E-05 | 2 | 1694.8401 | 0.964214 | 31.07483 | 0 |
| 15608458 |           | 0 | 0 | 0.01761  | 48.97  | 3.17E-05 | 3 | 1886.9558 | -0.48046 | 25.21672 | 1 |
| 15608458 |           | 0 | 0 | 0.02222  | 39.93  | 0.000224 | 3 | 1550.8132 | -0.9645  | 18.06279 | 2 |
| 15608458 | C3(Carban | 0 | 0 | 0.1132   | 37.7   | 0.00034  | 2 | 1411.7385 | 1.526925 | 29.08555 | 1 |
| 15608703 |           | 0 | 0 | 0.01063  | 78.28  | 2.01E-08 | 3 | 2302.2317 | 0.596076 | 41.75042 | 0 |
| 15608703 |           | 0 | 0 | 0.04058  | 75.12  | 5.54E-08 | 2 | 1175.6392 | 1.077248 | 19.25291 | 1 |
| 15608703 |           | 0 | 0 | 0.08063  | 67.51  | 4.35E-07 | 2 | 1119.6164 | 0.579937 | 25.86171 | 0 |
| 15608703 |           | 0 | 0 | 0.121    | 58.92  | 2.89E-06 | 2 | 1032.5472 | -0.14969 | 27.79815 | 0 |
| 15608703 | C4(Carban | 0 | 0 | 0.06239  | 56.33  | 4.89E-06 | 3 | 1752.8721 | 1.305951 | 26.46827 | 1 |
| 15608703 |           | 0 | 0 | 0.02832  | 56.1   | 5.15E-06 | 3 | 2458.226  | -1.47422 | 28.04097 | 1 |
| 15608703 | M20(Oxid. | 0 | 0 | 0.06066  | 52.19  | 1.51E-05 | 3 | 2474.2254 | 0.343818 | 26.98166 | 1 |
| 15608703 | C14(Carba | 0 | 0 | 0.1586   | 50.74  | 1.64E-05 | 3 | 1775.9145 | -2.20305 | 37.86191 | 0 |
| 15608703 |           | 0 | 0 | 0.0656   | 47.79  | 3.66E-05 | 3 | 1614.8968 | 0.32349  | 31.21502 | 1 |
| 15608703 |           | 0 | 0 | 0.3101   | 44.15  | 9.23E-05 | 2 | 894.43456 | -0.4857  | 19.41619 | 0 |
| 15608703 |           | 0 | 0 | 0.2339   | 43.5   | 4.46E-05 | 2 | 1104.5114 | 0.424475 | 36.80787 | 0 |
| 15608703 |           | 0 | 0 | 0.2726   | 42.12  | 0.000178 | 2 | 1100.6246 | 0.01637  | 25.14325 | 0 |
| 15608703 | N-Term(A  | 0 | 0 | 0.3398   | 37.35  | 0.000184 | 2 | 865.48882 | -0.2879  | 26.82447 | 0 |
| 15608703 | M2(Oxidat | 0 | 0 | 0.3201   | 36.58  | 0.000219 | 2 | 910.42912 | -0.85844 | 15.80159 | 0 |
| 15608703 |           | 0 | 0 | 0.1125   | 35.61  | 0.000357 | 3 | 1830.0284 | 2.761249 | 31.78286 | 2 |
| 15608703 | M10(Oxid. | 0 | 0 | 0.2951   | 31.39  | 0.000724 | 3 | 1373.6257 | -0.72127 | 18.23076 | 0 |
| 15608703 | M1(Oxidat | 0 | 0 | 0.3946   | 30.26  | 0.001554 | 2 | 1116.6181 | -1.22397 | 22.38665 | 0 |
| 15608703 |           | 0 | 0 | 0.3829   | 28.71  | 0.002153 | 2 | 816.49443 | 0.7484   | 18.92899 | 1 |
| 15608703 |           | 0 | 0 | 0.3948   | 27.72  | 0.001686 | 2 | 1357.6314 | -0.28435 | 20.75317 | 0 |
| 15608703 |           | 0 | 0 | 0.3948   | 27.26  | 0.001875 | 2 | 1147.6938 | -0.77383 | 25.17719 | 1 |
| 15608759 |           | 0 | 0 | 4.95E-16 | 112.18 | 1.27E-11 | 2 | 1986.03   | 0.384448 | 32.3093  | 1 |
| 15608759 | C2(Carban | 0 | 0 | 4.95E-16 | 102.94 | 8.64E-11 | 2 | 1675.8111 | 0.08799  | 31.89814 | 0 |
| 15608759 | C16(Carba | 0 | 0 | 4.95E-16 | 96.1   | 5.03E-10 | 3 | 3246.6573 | -0.13354 | 42.74052 | 1 |
| 15608759 |           | 0 | 0 | 4.95E-16 | 91.56  | 6.97E-10 | 2 | 1093.6481 | 0.372686 | 49.75799 | 0 |
| 15608759 |           | 0 | 0 | 4.95E-16 | 88.26  | 2.39E-09 | 3 | 3462.8697 | -0.23022 | 40.70986 | 1 |
| 15608759 |           | 0 | 0 | 4.95E-16 | 82.31  | 5.86E-09 | 2 | 1417.6961 | 0.17015  | 31.44982 | 0 |
| 15608759 |           | 0 | 0 | 4.95E-16 | 82.23  | 1.41E-08 | 2 | 1589.8649 | 0.160053 | 35.00379 | 0 |
| 15608759 |           | 0 | 0 | 4.95E-16 | 79.69  | 1.77E-08 | 2 | 1227.6219 | -0.88588 | 40.31782 | 0 |
| 15608759 |           | 0 | 0 | 4.95E-16 | 78.56  | 2.16E-08 | 2 | 2130.1563 | 0.3926   | 38.39247 | 0 |
| 15608759 |           | 0 | 0 | 4.95E-16 | 78.32  | 3.61E-08 | 2 | 1630.8772 | 0.793171 | 32.93558 | 0 |
| 15608759 |           | 0 | 0 | 4.95E-16 | 77.28  | 4.77E-08 | 2 | 1499.7854 | 0.064469 | 32.21224 | 0 |

|          |           |   |       |          |        |          |   |           |          |          |   |
|----------|-----------|---|-------|----------|--------|----------|---|-----------|----------|----------|---|
| 15608759 |           | 0 | 0     | 4.95E-16 | 72.26  | 1.37E-07 | 2 | 1940.0386 | -0.17499 | 41.89351 | 0 |
| 15608759 |           | 0 | 0     | 1.3E-12  | 67.18  | 8.23E-07 | 2 | 943.5407  | 9.205446 | 44.25286 | 0 |
| 15608759 |           | 0 | 0     | 4.95E-16 | 67.18  | 5.07E-07 | 3 | 2174.1059 | -0.16199 | 23.57089 | 2 |
| 15608759 |           | 0 | 0     | 4.95E-16 | 67.03  | 4.36E-07 | 3 | 2142.13   | -0.15559 | 31.03926 | 2 |
| 15608759 |           | 0 | 0     | 4.15E-12 | 63.67  | 5.37E-07 | 2 | 1121.5566 | -1.83241 | 22.12639 | 0 |
| 15608759 |           | 0 | 0     | 5.07E-16 | 62.61  | 8.5E-07  | 2 | 1745.8418 | -2.03159 | 28.3432  | 1 |
| 15608759 | C2(Carban | 0 | 0     | 7.18E-14 | 60.23  | 1.94E-06 | 3 | 2487.2642 | -0.80047 | 41.2258  | 1 |
| 15608759 |           | 0 | 0     | 6.32E-13 | 59.99  | 1E-06    | 2 | 1320.7848 | -0.84318 | 22.74144 | 1 |
| 15608759 |           | 0 | 0     | 3.25E-11 | 59.8   | 1.94E-06 | 2 | 1351.7317 | -0.8613  | 25.95244 | 0 |
| 15608759 | N-Term(A  | 0 | 0     | 1.13E-12 | 59.23  | 1.85E-06 | 2 | 1717.8233 | 1.041717 | 44.40797 | 0 |
| 15608759 |           | 0 | 0     | 3.76E-06 | 57.86  | 3.27E-06 | 3 | 1655.8857 | -0.45655 | 30.23737 | 1 |
| 15608759 |           | 0 | 0     | 7.77E-09 | 54.98  | 4.92E-06 | 2 | 1990.0889 | -2.6514  | 23.23703 | 1 |
| 15608759 |           | 0 | 0     | 4.26E-14 | 52.84  | 8.84E-06 | 2 | 1958.9666 | -0.70495 | 27.95671 | 2 |
| 15608759 |           | 0 | 0     | 0.001676 | 51.81  | 2.04E-05 | 2 | 830.47331 | 0.268402 | 26.73512 | 0 |
| 15608759 | N-Term(A  | 0 | 0     | 9.02E-07 | 51.63  | 1.58E-05 | 2 | 985.54228 | -0.29666 | 28.77391 | 0 |
| 15608759 |           | 0 | 0     | 1.07E-07 | 42.74  | 8.51E-05 | 3 | 2144.1353 | 0.29746  | 33.72216 | 1 |
| 15608759 |           | 0 | 0     | 1.87E-09 | 40.74  | 0.00019  | 4 | 2472.287  | 1.115045 | 33.48218 | 2 |
| 15608759 |           | 0 | 0     | 6.26E-06 | 40.14  | 0.000169 | 3 | 2018.0086 | 1.753615 | 25.13761 | 1 |
| 15608759 |           | 0 | 0     | 0.0112   | 38.98  | 0.000291 | 3 | 1713.8646 | -1.28608 | 20.41448 | 1 |
| 15608759 |           | 0 | 0     | 0.000175 | 35.92  | 0.000255 | 3 | 1946.1341 | 0.280585 | 48.23539 | 0 |
| 15608759 |           | 0 | 0.003 | 0.07599  | 28.55  | 0.003491 | 2 | 1277.6596 | -0.11568 | 20.62957 | 1 |
| 15608759 |           | 0 | 0.006 | 0.209    | 24.7   | 0.00338  | 2 | 872.52971 | -1.78861 | 19.905   | 1 |
| 15608773 |           | 0 | 0     | 0.1118   | 113.98 | 1E-11    | 2 | 2209.127  | -0.57062 | 29.11841 | 0 |
| 15608773 | M2(Oxidat | 0 | 0     | 0.09312  | 102.88 | 1.06E-10 | 2 | 2225.1211 | -0.91454 | 28.22213 | 0 |
| 15608773 | N-Term(A  | 0 | 0     | 0.07436  | 42.53  | 0.000131 | 3 | 2267.1441 | 4.585882 | 27.64659 | 0 |
| 15608773 |           | 0 | 0     | 0.263    | 28.52  | 0.002461 | 3 | 1666.8343 | 5.202918 | 13.70566 | 2 |
| 15608773 |           | 0 | 0     | 0.3309   | 23.89  | 0.010208 | 4 | 2496.2741 | 1.677403 | 31.38782 | 1 |
| 15608874 |           | 0 | 0     | 0.03949  | 72.16  | 1.13E-07 | 2 | 1694.8494 | -0.2056  | 36.038   | 0 |
| 15608874 |           | 0 | 0     | 0.04959  | 70.51  | 1.33E-07 | 2 | 1664.8793 | 2.251671 | 35.18739 | 1 |
| 15608874 |           | 0 | 0     | 0.1275   | 68.55  | 2.65E-07 | 2 | 1364.7216 | 0.479157 | 38.4364  | 0 |
| 15608874 |           | 0 | 0     | 0.1211   | 60.57  | 8.75E-07 | 2 | 1506.7013 | 0.066532 | 34.55754 | 0 |
| 15608874 |           | 0 | 0     | 0.1308   | 55.07  | 6.38E-06 | 3 | 1850.9502 | -0.38514 | 33.40822 | 1 |
| 15608874 |           | 0 | 0     | 0.2149   | 48.06  | 3.6E-05  | 2 | 843.49285 | -0.76568 | 25.87205 | 0 |
| 15608874 |           | 0 | 0     | 0.26     | 38.6   | 0.000138 | 2 | 871.39354 | -1.09026 | 23.97988 | 0 |
| 15608874 |           | 0 | 0     | 0.06592  | 35.12  | 0.000538 | 3 | 1921.9896 | 0.830307 | 34.02699 | 1 |
| 15608874 |           | 0 | 0     | 0.2402   | 25.47  | 0.002831 | 2 | 1141.5379 | -0.57984 | 20.93801 | 1 |

|          |           |   |   |          |        |          |   |           |          |          |   |
|----------|-----------|---|---|----------|--------|----------|---|-----------|----------|----------|---|
| 15608874 |           | 0 | 0 | 0.1259   | 17.69  | 0.02383  | 3 | 1821.986  | 0.079455 | 38.84824 | 1 |
| 15608874 |           | 0 | 0 | 0.207    | 14.73  | 0.067302 | 3 | 1297.6769 | 0.617796 | 17.02079 | 2 |
| 15608881 |           | 0 | 0 | 0.04264  | 124.47 | 9.11E-13 | 2 | 1922.9831 | 0.623264 | 29.51861 | 1 |
| 15608881 |           | 0 | 0 | 0.08506  | 94.25  | 7.33E-10 | 3 | 1614.8489 | 0.098319 | 27.17225 | 0 |
| 15608881 |           | 0 | 0 | 0.1162   | 92.71  | 5.35E-10 | 2 | 1355.6324 | -0.14715 | 22.49887 | 0 |
| 15608881 |           | 0 | 0 | 0.126    | 79.26  | 2.02E-08 | 2 | 2338.1199 | -0.51779 | 31.74311 | 1 |
| 15608881 | C7(Carban | 0 | 0 | 0.09834  | 76.16  | 2.42E-08 | 2 | 1550.7309 | 2.609905 | 21.43206 | 0 |
| 15608881 |           | 0 | 0 | 0.1379   | 62.19  | 1.06E-06 | 2 | 1716.8349 | 0.486457 | 32.20596 | 0 |
| 15608881 |           | 0 | 0 | 0.4155   | 37.19  | 0.000191 | 3 | 2684.2331 | 2.49461  | 42.5266  | 0 |
| 15608881 | C25(Carba | 0 | 0 | 0.2206   | 35.43  | 0.000415 | 4 | 3578.7653 | -0.19554 | 43.6694  | 0 |
| 15608881 |           | 0 | 0 | 0.1294   | 30.29  | 0.001777 | 2 | 2099.0862 | -0.89661 | 24.54856 | 1 |
| 15608881 | M24(Oxid. | 0 | 0 | 0.3703   | 23.6   | 0.004355 | 3 | 3875.7953 | -0.48896 | 41.81006 | 0 |
| 15608934 | C9(Carban | 0 | 0 | 0.02949  | 88.97  | 2.98E-09 | 2 | 1746.8685 | -0.40615 | 28.75004 | 0 |
| 15608934 |           | 0 | 0 | 0.01314  | 85.51  | 4.64E-09 | 3 | 2890.4355 | 0.836792 | 38.47857 | 1 |
| 15608934 |           | 0 | 0 | 0.01286  | 85.19  | 7.11E-09 | 2 | 1333.696  | 0.089338 | 34.13702 | 0 |
| 15608934 |           | 0 | 0 | 0.1643   | 80.13  | 4.8E-08  | 2 | 1142.6318 | 0.0264   | 31.99028 | 0 |
| 15608934 | C14(Carba | 0 | 0 | 0.1578   | 72.66  | 5.41E-08 | 2 | 2326.0508 | -0.41549 | 27.75706 | 0 |
| 15608934 |           | 0 | 0 | 0.07429  | 66.86  | 4.84E-07 | 2 | 2507.2112 | 2.491988 | 40.46983 | 0 |
| 15608934 | C7(Carban | 0 | 0 | 0.04065  | 65.9   | 5.91E-07 | 2 | 2175.1197 | 0.423519 | 32.86598 | 1 |
| 15608934 |           | 0 | 0 | 0.1181   | 55.57  | 4.85E-06 | 3 | 1939.0636 | -0.61809 | 44.94598 | 0 |
| 15608934 | C10(Carba | 0 | 0 | 0.1045   | 51.43  | 7.55E-06 | 4 | 4524.2072 | -0.67222 | 43.09333 | 0 |
| 15608934 |           | 0 | 0 | 0.2743   | 35     | 0.000522 | 2 | 787.48186 | -0.84088 | 33.39763 | 0 |
| 15608934 |           | 0 | 0 | 0.2347   | 24.46  | 0.005192 | 3 | 1162.6441 | 0.039411 | 18.11949 | 2 |
| 57116687 | C2(Carban | 0 | 0 | 0.01423  | 109    | 1.26E-11 | 2 | 1784.7175 | -0.37007 | 25.90719 | 0 |
| 57116687 | M27(Oxid. | 0 | 0 | 0.02541  | 97.02  | 3.38E-10 | 3 | 3096.6635 | 2.683868 | 40.68172 | 0 |
| 57116687 |           | 0 | 0 | 0.04847  | 83.1   | 7.1E-09  | 2 | 1428.6847 | -1.35882 | 22.48309 | 0 |
| 57116687 |           | 0 | 0 | 0.03891  | 80.36  | 2.07E-08 | 2 | 2258.1724 | -1.2047  | 36.46444 | 0 |
| 57116687 | M11(Oxid. | 0 | 0 | 0.006755 | 77.27  | 1.87E-08 | 3 | 4039.8563 | -3.4714  | 33.63462 | 1 |
| 57116687 |           | 0 | 0 | 0.03056  | 72.42  | 8.88E-08 | 3 | 2348.1661 | 1.307196 | 29.56254 | 1 |
| 57116687 |           | 0 | 0 | 0.05476  | 67.52  | 2.66E-07 | 2 | 1105.5447 | -1.11797 | 27.55142 | 0 |
| 57116687 | M7(Oxidat | 0 | 0 | 0.04079  | 66.69  | 2.68E-07 | 2 | 1121.5402 | -0.59522 | 23.61353 | 0 |
| 57116687 | M11(Oxid. | 0 | 0 | 0.03314  | 63.71  | 8.72E-07 | 3 | 2274.1719 | 0.819134 | 33.41358 | 0 |
| 57116687 | C14(Carba | 0 | 0 | 0.1126   | 62.45  | 5.68E-07 | 3 | 1950.8904 | 1.429968 | 29.07338 | 0 |
| 57116687 |           | 0 | 0 | 0.07278  | 54.13  | 3.85E-06 | 2 | 938.49388 | -0.33911 | 22.20544 | 0 |
| 57116687 |           | 0 | 0 | 0.2172   | 44.46  | 6.8E-05  | 2 | 829.4525  | -0.22917 | 16.94587 | 0 |
| 57116687 | C9(Carban | 0 | 0 | 0.2801   | 42.52  | 5.58E-05 | 2 | 1886.8531 | 0.407897 | 13.86335 | 1 |

|          |           |   |   |          |        |          |   |           |          |          |   |
|----------|-----------|---|---|----------|--------|----------|---|-----------|----------|----------|---|
| 57116687 |           | 0 | 0 | 0.2131   | 40.74  | 0.000169 | 3 | 1915.9847 | 2.005232 | 35.25929 | 1 |
| 57116687 |           | 0 | 0 | 0.1036   | 40.11  | 0.000175 | 3 | 3754.8431 | -0.80657 | 36.9623  | 0 |
| 57116687 | N-Term(A  | 0 | 0 | 0.2898   | 33.89  | 0.000449 | 2 | 871.46306 | -0.22492 | 21.72729 | 0 |
| 57116687 |           | 0 | 0 | 0.3013   | 33.65  | 0.0011   | 2 | 1062.5682 | -0.90203 | 24.55843 | 1 |
| 57116687 |           | 0 | 0 | 0.2855   | 29.46  | 0.002548 | 2 | 1056.5898 | -1.09978 | 16.65972 | 1 |
| 57116894 | M1(Oxidat | 0 | 0 | 0.001012 | 97.23  | 1.89E-10 | 2 | 2197.9913 | -0.27651 | 28.92445 | 0 |
| 57116894 |           | 0 | 0 | 0.001031 | 93.26  | 7.32E-10 | 2 | 1745.8285 | 0.153228 | 41.39913 | 0 |
| 57116894 |           | 0 | 0 | 9.54E-05 | 92.02  | 1.7E-09  | 2 | 1685.8907 | 0.884576 | 37.74564 | 0 |
| 57116894 |           | 0 | 0 | 0.001795 | 88.86  | 1.3E-09  | 2 | 2181.9979 | 0.412023 | 28.88079 | 0 |
| 57116894 |           | 0 | 0 | 0.007624 | 86.83  | 2.7E-09  | 2 | 1438.8398 | 1.416404 | 34.71522 | 0 |
| 57116894 | M8(Oxidat | 0 | 0 | 0.004942 | 84.05  | 1.28E-08 | 2 | 1701.8843 | 0.134347 | 31.67612 | 0 |
| 57116894 | M5(Oxidat | 0 | 0 | 0.006976 | 80.56  | 1.19E-08 | 3 | 2956.4095 | -1.5398  | 30.70959 | 1 |
| 57116894 |           | 0 | 0 | 0.00376  | 75.11  | 6.17E-08 | 2 | 1087.5738 | -0.45352 | 21.62623 | 0 |
| 57116894 |           | 0 | 0 | 0.000316 | 73.06  | 1.09E-07 | 2 | 1863.9125 | 0.070757 | 34.269   | 0 |
| 57116894 |           | 0 | 0 | 0.04893  | 72.56  | 7.76E-08 | 2 | 2924.4227 | -0.54242 | 36.64054 | 1 |
| 57116894 |           | 0 | 0 | 0.000541 | 68.46  | 2.78E-07 | 2 | 1901.9324 | 1.592772 | 36.82835 | 1 |
| 57116894 |           | 0 | 0 | 0.03228  | 60.08  | 2.36E-06 | 3 | 2586.314  | 2.036758 | 48.22348 | 1 |
| 57116894 | M5(Oxidat | 0 | 0 | 0.04681  | 59.72  | 1.55E-06 | 3 | 2940.422  | 0.977724 | 35.34307 | 1 |
| 57116894 |           | 0 | 0 | 0.03562  | 55.94  | 2.54E-06 | 3 | 2172.2607 | -0.26056 | 33.72243 | 1 |
| 57116894 |           | 0 | 0 | 0.02454  | 54.16  | 3.83E-06 | 2 | 1257.5528 | -0.09489 | 16.49157 | 0 |
| 57116894 |           | 0 | 0 | 0.07112  | 53.49  | 1.03E-05 | 3 | 2395.1947 | 0.745242 | 41.99849 | 1 |
| 57116894 |           | 0 | 0 | 0.0106   | 47.91  | 1.61E-05 | 2 | 1005.5734 | 0.597228 | 29.30753 | 1 |
| 57116894 | M5(Oxidat | 0 | 0 | 0.1088   | 47.47  | 1.79E-05 | 2 | 1273.5475 | -0.22249 | 14.78535 | 0 |
| 57116894 |           | 0 | 0 | 0.1182   | 36.91  | 0.000204 | 2 | 913.47399 | 0.168901 | 16.33181 | 0 |
| 57116894 |           | 0 | 0 | 0.02856  | 35.34  | 0.000409 | 2 | 1290.7165 | -0.04109 | 24.19876 | 2 |
| 57116894 | N-Term(A  | 0 | 0 | 0.32     | 35.07  | 0.000373 | 3 | 2982.4197 | -3.3766  | 30.34776 | 1 |
| 57116894 | N-Term(A  | 0 | 0 | 0.2578   | 32.17  | 0.001031 | 2 | 1129.5828 | -1.79272 | 23.11802 | 0 |
| 57116894 |           | 0 | 0 | 0.1832   | 30.03  | 0.001092 | 2 | 908.49919 | 0.332203 | 34.64719 | 0 |
| 57116894 |           | 0 | 0 | 0.06696  | 28.28  | 0.00208  | 2 | 1036.5958 | 1.82272  | 28.009   | 1 |
| 57116894 |           | 0 | 0 | 0.3437   | 25.59  | 0.005383 | 2 | 1423.7293 | 0.269957 | 18.09495 | 1 |
| 57116894 | M17(Oxid  | 0 | 0 | 0.2711   | 21.51  | 0.007046 | 4 | 4080.904  | 0.131116 | 38.48539 | 2 |
| 57116894 |           | 0 | 0 | 0.2308   | 17.57  | 0.020123 | 3 | 1594.9383 | -0.32835 | 29.70804 | 1 |
| 15608956 |           | 0 | 0 | 3.02E-14 | 108.02 | 3.08E-11 | 2 | 1749.9039 | 0.391389 | 32.04502 | 0 |
| 15608956 |           | 0 | 0 | 0.02858  | 65.91  | 3.21E-07 | 2 | 859.49993 | 0.33069  | 21.70202 | 0 |
| 15608956 |           | 0 | 0 | 0.003703 | 64.51  | 3.53E-07 | 2 | 1003.5898 | 0.247091 | 22.7992  | 1 |
| 15608956 |           | 0 | 0 | 2.85E-08 | 61.45  | 1.61E-06 | 3 | 2538.312  | 2.861562 | 32.75543 | 0 |

|          |           |   |   |          |        |          |   |           |          |          |   |
|----------|-----------|---|---|----------|--------|----------|---|-----------|----------|----------|---|
| 15608956 | C6(Carban | 0 | 0 | 0.01383  | 58.84  | 2.81E-06 | 3 | 2178.1364 | 1.249413 | 31.38755 | 0 |
| 15608956 |           | 0 | 0 | 0.06424  | 58.76  | 1.33E-06 | 2 | 1204.5378 | -0.36028 | 29.84585 | 0 |
| 15608956 |           | 0 | 0 | 0.003101 | 58.45  | 2.29E-06 | 2 | 1243.7122 | 0.341318 | 21.73703 | 1 |
| 15608956 | C4(Carban | 0 | 0 | 0.002023 | 57.88  | 4.56E-06 | 2 | 2491.2471 | -1.08676 | 32.57422 | 1 |
| 15608956 | M23(Oxid. | 0 | 0 | 4.21E-05 | 52.28  | 1.42E-05 | 3 | 4117.092  | 1.621978 | 42.87875 | 0 |
| 15608956 | C4(Carban | 0 | 0 | 1.16E-08 | 51.61  | 1.04E-05 | 2 | 1932.9468 | -0.8538  | 30.78991 | 0 |
| 15608956 |           | 0 | 0 | 0.00021  | 47.72  | 3.3E-05  | 2 | 1308.6994 | -1.9507  | 17.44585 | 1 |
| 15608956 |           | 0 | 0 | 0.000164 | 46.15  | 5.58E-05 | 3 | 1537.8341 | 0.500247 | 30.39483 | 1 |
| 15608956 |           | 0 | 0 | 4.43E-05 | 43.17  | 9.64E-05 | 3 | 4101.0846 | -1.42729 | 43.94465 | 0 |
| 15608956 |           | 0 | 0 | 0.0106   | 39.43  | 0.00016  | 2 | 1066.5773 | -0.61242 | 28.36572 | 0 |
| 15608956 |           | 0 | 0 | 1.41E-05 | 30.32  | 0.001579 | 4 | 3135.589  | -0.89978 | 32.23417 | 1 |
| 15608956 |           | 0 | 0 | 0.00498  | 30.08  | 0.00162  | 3 | 2797.4688 | 1.981751 | 38.26099 | 1 |
| 15608956 |           | 0 | 0 | 0.2084   | 29.94  | 0.001012 | 2 | 940.54613 | -0.14051 | 30.83896 | 0 |
| 15608956 |           | 0 | 0 | 0.003442 | 28.15  | 0.001527 | 3 | 2165.2406 | 0.20018  | 35.65691 | 2 |
| 15608956 |           | 0 | 0 | 0.2084   | 27.58  | 0.002444 | 3 | 1922.0421 | -1.74964 | 30.33424 | 2 |
| 15608956 | C6(Carban | 0 | 0 | 0.001075 | 19.85  | 0.016045 | 6 | 3909.0093 | -2.48762 | 36.78255 | 1 |
| 15608956 |           | 0 | 0 | 0.08855  | 12.9   | 0.056415 | 5 | 4057.1226 | 0.585535 | 37.30404 | 2 |
| 15608982 |           | 0 | 0 | 0.1264   | 107.79 | 3.66E-11 | 2 | 1893.9952 | -1.01189 | 40.01835 | 0 |
| 15608982 |           | 0 | 0 | 0.1169   | 101.1  | 1.44E-10 | 3 | 2708.4561 | -0.63557 | 42.67382 | 1 |
| 15608982 |           | 0 | 0 | 0.048144 | 89     | 2.64E-09 | 2 | 2465.3243 | -0.18454 | 44.59122 | 0 |
| 15608982 |           | 0 | 0 | 0.06051  | 82.91  | 9.98E-09 | 2 | 2121.1407 | 2.52284  | 38.51485 | 1 |
| 15608982 |           | 0 | 0 | 0.1644   | 70.76  | 1.09E-07 | 2 | 1452.8163 | -0.45396 | 27.64686 | 0 |
| 15608982 | C11(Carba | 0 | 0 | 0.153    | 70.52  | 1.86E-07 | 2 | 1770.9583 | 0.62918  | 35.88617 | 0 |
| 15608982 |           | 0 | 0 | 0.09448  | 63.18  | 4.81E-07 | 5 | 3185.7414 | 0.725107 | 40.65027 | 2 |
| 15608982 | C14(Carba | 0 | 0 | 0.1878   | 59.84  | 2.28E-06 | 2 | 2155.1685 | -0.38079 | 38.97916 | 1 |
| 15608982 | C5(Carban | 0 | 0 | 0.1308   | 50.57  | 1.32E-05 | 3 | 2338.2623 | -1.63073 | 29.61053 | 1 |
| 15608982 |           | 0 | 0 | 0.4195   | 46.63  | 2.82E-05 | 3 | 2942.6079 | 0.680692 | 41.98482 | 1 |
| 15608982 | C5(Carban | 0 | 0 | 0.3621   | 42.94  | 9.91E-05 | 2 | 904.46709 | 0.136339 | 17.04103 | 0 |
| 15609014 |           | 0 | 0 | 0.0004   | 101.23 | 9.79E-11 | 3 | 3761.822  | 2.050416 | 39.10357 | 1 |
| 15609014 |           | 0 | 0 | 0.000731 | 98.24  | 1.5E-10  | 2 | 2353.0938 | -0.25231 | 33.54292 | 0 |
| 15609014 |           | 0 | 0 | 0.01016  | 87.59  | 1.74E-09 | 2 | 1584.6827 | 0.847795 | 35.96334 | 0 |
| 15609014 |           | 0 | 0 | 0.001002 | 84.08  | 3.9E-09  | 3 | 2655.5385 | 1.46298  | 49.53403 | 1 |
| 15609014 |           | 0 | 0 | 0.01087  | 77.38  | 4.39E-08 | 2 | 1427.7371 | -0.43646 | 31.72551 | 0 |
| 15609014 |           | 0 | 0 | 0.03713  | 76.21  | 2.39E-08 | 2 | 1560.8907 | 0.590239 | 37.0097  | 0 |
| 15609014 | C10(Carba | 0 | 0 | 0.01135  | 73.18  | 6.01E-08 | 3 | 2409.3111 | 1.587179 | 45.63499 | 1 |
| 15609014 |           | 0 | 0 | 0.001406 | 69.51  | 2.97E-07 | 3 | 2341.2248 | -0.51926 | 28.24057 | 1 |

|          |           |   |       |          |        |          |   |           |          |          |   |
|----------|-----------|---|-------|----------|--------|----------|---|-----------|----------|----------|---|
| 15609014 |           | 0 | 0     | 0.03269  | 67.37  | 1.83E-07 | 2 | 2169.9935 | -0.05323 | 38.89948 | 1 |
| 15609014 |           | 0 | 0     | 0.008741 | 66.35  | 4.63E-07 | 4 | 2842.4823 | 1.224004 | 39.68638 | 1 |
| 15609014 |           | 0 | 0     | 0.01206  | 66.21  | 3.71E-07 | 3 | 1381.7054 | -1.2042  | 28.57034 | 0 |
| 15609014 | C8(Carban | 0 | 0     | 0.06071  | 66.15  | 4.85E-07 | 2 | 2140.118  | -1.91007 | 47.25556 | 0 |
| 15609014 |           | 0 | 0     | 0.1114   | 65.97  | 3.04E-07 | 2 | 978.53581 | -0.94744 | 19.12373 | 0 |
| 15609014 |           | 0 | 0     | 0.01031  | 65.52  | 3.79E-07 | 2 | 1113.6624 | -0.26057 | 33.13425 | 0 |
| 15609014 |           | 0 | 0     | 0.003534 | 62.95  | 5.06E-07 | 3 | 2811.6352 | -0.1975  | 47.84989 | 2 |
| 15609014 |           | 0 | 0     | 0.01559  | 61.06  | 1.76E-06 | 4 | 2558.3202 | -0.83655 | 35.17926 | 1 |
| 15609014 |           | 0 | 0     | 0.0388   | 51.49  | 9.22E-06 | 4 | 4123.9904 | 1.102294 | 41.74102 | 2 |
| 15609014 |           | 0 | 0     | 0.04501  | 51.12  | 1.7E-05  | 2 | 1882.9572 | -1.45536 | 33.92355 | 0 |
| 15609014 |           | 0 | 0     | 0.2209   | 46.32  | 2.92E-05 | 2 | 1389.7822 | -2.01414 | 32.43315 | 1 |
| 15609014 |           | 0 | 0     | 0.07424  | 45.94  | 6.49E-05 | 3 | 2402.2218 | 0.22628  | 37.72999 | 0 |
| 15609014 |           | 0 | 0     | 0.006625 | 42.76  | 5.28E-05 | 3 | 3967.872  | -3.19261 | 44.06022 | 1 |
| 15609014 |           | 0 | 0     | 0.01625  | 39.5   | 0.000258 | 3 | 2538.3237 | -0.62944 | 35.30497 | 1 |
| 15609014 |           | 0 | 0     | 0.1034   | 36.12  | 0.00033  | 3 | 3917.9103 | -1.31444 | 38.1733  | 2 |
| 15609014 |           | 0 | 0     | 0.1071   | 35.36  | 0.000975 | 2 | 942.52995 | -0.30394 | 18.78868 | 1 |
| 15609014 |           | 0 | 0     | 0.02875  | 34.03  | 0.000593 | 3 | 2476.3548 | 1.146516 | 36.32656 | 1 |
| 15609014 |           | 0 | 0     | 0.08936  | 33.74  | 0.000549 | 4 | 3497.851  | 1.935918 | 40.09572 | 2 |
| 15609014 |           | 0 | 0     | 0.09861  | 30.1   | 0.001906 | 2 | 1583.8381 | -0.49942 | 33.11867 | 1 |
| 15609014 |           | 0 | 0     | 0.3041   | 28.73  | 0.003885 | 2 | 786.42949 | 0.470046 | 18.80467 | 0 |
| 15609014 |           | 0 | 0     | 0.06619  | 24.39  | 0.003631 | 4 | 1716.9893 | -0.92766 | 34.53756 | 1 |
| 15609014 |           | 0 | 0     | 0.096    | 23.05  | 0.00545  | 5 | 4205.1619 | -1.47647 | 41.00702 | 2 |
| 15609110 |           | 0 | 0     | 5.09E-07 | 64.08  | 7.82E-07 | 3 | 2688.3202 | -0.83573 | 30.86129 | 0 |
| 15609110 |           | 0 | 0.005 | 0.1144   | 25     | 0.008538 | 2 | 1132.603  | -0.72261 | 41.86921 | 0 |
| 15609134 | C8(Carban | 0 | 0     | 4.09E-14 | 101.47 | 1.43E-10 | 2 | 1703.8558 | 1.352925 | 34.48532 | 0 |
| 15609134 |           | 0 | 0     | 1.31E-14 | 89.59  | 1.92E-09 | 2 | 1779.8799 | -0.4612  | 24.6357  | 0 |
| 15609134 | C10(Carba | 0 | 0     | 2.92E-10 | 81.91  | 1.1E-08  | 2 | 1625.8428 | -0.04568 | 21.28539 | 0 |
| 15609134 | M6(Oxidat | 0 | 0     | 1.66E-10 | 72.64  | 9.53E-08 | 2 | 1795.8764 | 0.403186 | 21.55762 | 0 |
| 15609134 | C15(Carba | 0 | 0     | 9.9E-08  | 64.98  | 6.35E-07 | 2 | 1931.0247 | -1.051   | 29.59936 | 1 |
| 15609134 |           | 0 | 0     | 4.97E-06 | 64.62  | 6.04E-07 | 3 | 1800.9864 | 0.472506 | 36.2459  | 0 |
| 15609134 | M6(Oxidat | 0 | 0     | 3.54E-05 | 62.13  | 7.35E-07 | 4 | 3773.8082 | 2.20916  | 37.95093 | 0 |
| 15609134 |           | 0 | 0     | 0.000686 | 60.57  | 1.18E-06 | 2 | 898.5465  | -0.47404 | 20.93354 | 0 |
| 15609134 | M4(Oxidat | 0 | 0     | 0.000539 | 59.47  | 1.53E-06 | 2 | 924.44481 | -0.80645 | 14.85436 | 0 |
| 15609134 | M16(Oxid. | 0 | 0     | 1.18E-06 | 58.44  | 3.72E-06 | 3 | 2330.1908 | 4.198691 | 33.42343 | 1 |
| 15609134 | M8(Oxidat | 0 | 0     | 1.42E-07 | 57.54  | 2.64E-06 | 2 | 1032.5248 | -0.70548 | 17.89782 | 0 |
| 15609134 |           | 0 | 0     | 1.15E-08 | 55.9   | 4.24E-06 | 3 | 1566.8236 | 0.032049 | 23.32615 | 1 |

|          |           |   |   |          |       |          |   |           |          |          |   |
|----------|-----------|---|---|----------|-------|----------|---|-----------|----------|----------|---|
| 15609134 |           | 0 | 0 | 0.000833 | 55.6  | 5.78E-06 | 2 | 908.45024 | -0.43854 | 18.20964 | 0 |
| 15609134 |           | 0 | 0 | 7.09E-05 | 55.04 | 8.62E-06 | 2 | 1016.5301 | -0.49518 | 21.88759 | 0 |
| 15609134 | C8(Carban | 0 | 0 | 3.88E-10 | 50.17 | 2.4E-05  | 3 | 2133.0492 | -0.67828 | 32.03804 | 1 |
| 15609134 | M1(Oxidat | 0 | 0 | 1.6E-06  | 49.24 | 1.19E-05 | 3 | 2223.0205 | 0.03852  | 28.51946 | 0 |
| 15609134 | M4(Oxidat | 0 | 0 | 0.1044   | 44.07 | 6.07E-05 | 3 | 1250.6515 | -0.55402 | 18.33333 | 1 |
| 15609134 | M3(Oxidat | 0 | 0 | 0.006835 | 42.44 | 7.41E-05 | 2 | 1035.5036 | -0.45259 | 16.02363 | 0 |
| 15609134 | C13(Carba | 0 | 0 | 3.86E-07 | 40.66 | 0.00015  | 2 | 2957.4332 | 0.702558 | 34.97057 | 0 |
| 15609134 |           | 0 | 0 | 0.002466 | 40.24 | 9.44E-05 | 2 | 1167.7311 | -0.84317 | 27.13342 | 1 |
| 15609134 |           | 0 | 0 | 0.01021  | 39    | 0.000126 | 2 | 893.47215 | -0.66792 | 27.76402 | 0 |
| 15609134 | C5(Carban | 0 | 0 | 0.01107  | 38.79 | 0.000145 | 3 | 2207.0218 | -1.6568  | 30.51545 | 0 |
| 15609134 | M6(Oxidat | 0 | 0 | 0.000125 | 34.46 | 0.000357 | 4 | 3757.8021 | -0.75884 | 41.67922 | 0 |
| 15609134 |           | 0 | 0 | 0.07086  | 32.91 | 0.001151 | 2 | 956.55138 | -1.06961 | 20.10585 | 1 |
| 15609134 | C5(Carban | 0 | 0 | 0.04251  | 26.94 | 0.002018 | 3 | 2191.0283 | -1.0369  | 33.23678 | 0 |
| 15609134 | N-Term(A  | 0 | 0 | 0.1074   | 26.92 | 0.00315  | 3 | 1837.8852 | -0.54643 | 25.42817 | 0 |
| 15609134 |           | 0 | 0 | 0.07732  | 12.58 | 0.07177  | 3 | 3741.8148 | 1.259056 | 42.30293 | 0 |
| 15609291 |           | 0 | 0 | 0.1795   | 62.78 | 5.26E-07 | 2 | 1291.7415 | 0.434589 | 33.69759 | 0 |
| 15609291 |           | 0 | 0 | 0.2819   | 57.92 | 3.23E-06 | 2 | 1278.6536 | -1.07085 | 14.0196  | 0 |
| 15609291 | N-Term(A  | 0 | 0 | 0.2961   | 41.09 | 0.000144 | 2 | 1320.6642 | -0.99505 | 16.48086 | 0 |
| 15609291 |           | 0 | 0 | 0.1728   | 37.84 | 0.000164 | 3 | 1674.01   | -0.09401 | 37.30385 | 1 |
| 15609291 |           | 0 | 0 | 0.3137   | 34.41 | 0.000398 | 2 | 1908.075  | 0.381259 | 38.73367 | 1 |
| 15609291 |           | 0 | 0 | 0.5139   | 31.68 | 0.000713 | 2 | 797.4262  | -0.34641 | 13.12892 | 0 |
| 15609291 | M2(Oxidat | 0 | 0 | 0.3852   | 25.17 | 0.006386 | 2 | 1308.6857 | 1.161657 | 18.28115 | 0 |
| 15609291 |           | 0 | 0 | 0.456    | 15.48 | 0.052381 | 3 | 1292.6901 | 0.607888 | 20.59658 | 0 |
| 15609332 | M10(Oxid. | 0 | 0 | 0.004031 | 87.71 | 2.12E-09 | 2 | 2144.0513 | -1.30089 | 33.23331 | 0 |
| 15609332 | C12(Carba | 0 | 0 | 0.05681  | 47.57 | 1.75E-05 | 2 | 1486.66   | 0.527631 | 19.95438 | 0 |
| 15609332 |           | 0 | 0 | 0.2808   | 39.57 | 0.000199 | 2 | 876.49419 | 0.430036 | 19.71211 | 1 |
| 15609332 | C12(Carba | 0 | 0 | 0.4386   | 35.99 | 0.000251 | 3 | 2388.0412 | -2.94109 | 18.28206 | 2 |
| 15609337 |           | 0 | 0 | 6.67E-10 | 83.43 | 6.81E-09 | 2 | 1940.0921 | -1.56832 | 36.84068 | 0 |
| 15609337 |           | 0 | 0 | 1.88E-06 | 71.59 | 1.42E-07 | 2 | 1187.6406 | 2.196985 | 19.89494 | 1 |
| 15609337 |           | 0 | 0 | 1.24E-05 | 67.64 | 4.13E-07 | 2 | 1877.9892 | 1.215151 | 28.60215 | 0 |
| 15609337 |           | 0 | 0 | 2.08E-06 | 65.27 | 6.39E-07 | 3 | 2458.2323 | 1.587166 | 38.08516 | 0 |
| 15609337 |           | 0 | 0 | 1.04E-06 | 63.69 | 4.27E-07 | 2 | 1409.617  | -0.70966 | 21.897   | 0 |
| 15609337 |           | 0 | 0 | 1.9E-09  | 63.38 | 5.51E-07 | 2 | 1897.8914 | -0.69882 | 25.70512 | 1 |
| 15609337 | M5(Oxidat | 0 | 0 | 7.67E-06 | 59.45 | 2.72E-06 | 3 | 2641.3165 | 0.160957 | 48.12797 | 0 |
| 15609337 |           | 0 | 0 | 0.001477 | 53.58 | 9.21E-06 | 2 | 1118.584  | -0.06198 | 25.0158  | 0 |
| 15609337 |           | 0 | 0 | 0.022    | 36.19 | 0.000361 | 2 | 2034.0895 | 0.739317 | 27.29119 | 1 |

|          |           |   |   |          |        |          |   |           |          |          |   |
|----------|-----------|---|---|----------|--------|----------|---|-----------|----------|----------|---|
| 15609337 |           | 0 | 0 | 0.2128   | 36.06  | 0.000446 | 2 | 778.42082 | 0.247509 | 15.28094 | 0 |
| 15609337 |           | 0 | 0 | 0.006999 | 35.73  | 0.000321 | 3 | 2821.5269 | 1.211515 | 40.03702 | 1 |
| 15609337 |           | 0 | 0 | 0.4054   | 26.61  | 0.002183 | 2 | 900.44615 | -0.03081 | 25.26193 | 0 |
| 15609373 |           | 0 | 0 | 3.1E-06  | 97.13  | 5.42E-10 | 2 | 2159.1246 | 0.031502 | 39.85477 | 0 |
| 15609373 |           | 0 | 0 | 8.27E-06 | 83.23  | 6.42E-09 | 2 | 1279.6086 | 1.513593 | 31.9063  | 0 |
| 15609373 |           | 0 | 0 | 0.005242 | 78.8   | 2.18E-08 | 3 | 3325.7494 | 1.957894 | 45.77644 | 0 |
| 15609373 |           | 0 | 0 | 0.000197 | 72.44  | 5.69E-08 | 2 | 1181.6263 | -0.94192 | 23.44118 | 0 |
| 15609373 |           | 0 | 0 | 2.53E-05 | 71.1   | 1.16E-07 | 2 | 2038.9897 | 0.662251 | 35.88453 | 1 |
| 15609373 |           | 0 | 0 | 0.002085 | 70.22  | 1.85E-07 | 2 | 1353.6834 | 0.166884 | 31.79701 | 0 |
| 15609373 | M8(Oxidat | 0 | 0 | 0.000528 | 67.46  | 3.23E-07 | 2 | 1369.6766 | -1.11342 | 25.81739 | 0 |
| 15609373 |           | 0 | 0 | 0.002161 | 57.22  | 4.84E-06 | 2 | 2044.04   | -0.93771 | 26.74455 | 2 |
| 15609373 | C7(Carban | 0 | 0 | 0.1099   | 54.18  | 4.97E-06 | 4 | 2234.2201 | 0.607899 | 28.82186 | 2 |
| 15609373 | C6(Carban | 0 | 0 | 5.44E-05 | 53.52  | 6.22E-06 | 3 | 2078.1147 | -1.43261 | 30.71584 | 1 |
| 15609373 |           | 0 | 0 | 0.001351 | 44.61  | 5.19E-05 | 3 | 1729.8719 | 0.143955 | 26.92024 | 1 |
| 15609373 |           | 0 | 0 | 0.000615 | 43.98  | 0.000108 | 3 | 1287.7007 | -0.68615 | 25.63126 | 1 |
| 15609373 | C7(Carban | 0 | 0 | 0.001008 | 39.36  | 0.0004   | 2 | 1071.6092 | -0.03438 | 24.93689 | 1 |
| 15609373 |           | 0 | 0 | 0.08782  | 39.09  | 0.000166 | 2 | 778.40019 | 0.851468 | 31.39981 | 0 |
| 15609373 |           | 0 | 0 | 0.1185   | 38.55  | 0.000237 | 3 | 1210.6479 | -0.09826 | 27.00658 | 1 |
| 15609373 |           | 0 | 0 | 0.1861   | 37.82  | 0.000496 | 3 | 1885.9724 | -0.1835  | 25.53117 | 2 |
| 15609373 | M8(Oxidat | 0 | 0 | 0.000603 | 33.07  | 0.00074  | 3 | 1709.865  | 0.595419 | 24.60976 | 1 |
| 15609373 |           | 0 | 0 | 0.1203   | 27.21  | 0.004563 | 2 | 973.53166 | 0.34155  | 24.93872 | 0 |
| 15609373 |           | 0 | 0 | 0.0112   | 18.92  | 0.028852 | 3 | 1693.8715 | 1.418533 | 29.17472 | 1 |
| 15609399 |           | 0 | 0 | 6.85E-11 | 113.35 | 8.09E-12 | 3 | 3387.6844 | 0.797022 | 40.03924 | 0 |
| 15609399 |           | 0 | 0 | 7.04E-08 | 89.74  | 2.76E-09 | 2 | 1984.0357 | -1.51165 | 34.2971  | 0 |
| 15609399 |           | 0 | 0 | 2.36E-06 | 67.04  | 6.03E-07 | 2 | 1515.7909 | -0.35635 | 23.20143 | 0 |
| 15609399 |           | 0 | 0 | 5.51E-07 | 58.67  | 1.36E-06 | 2 | 1192.6731 | 0.521519 | 38.07705 | 0 |
| 15609399 |           | 0 | 0 | 1.27E-06 | 52.54  | 5.56E-06 | 3 | 1449.8221 | 0.5486   | 33.54784 | 1 |
| 15609399 | N-Term(A  | 0 | 0 | 1.39E-06 | 49.11  | 1.41E-05 | 2 | 1234.683  | -0.04479 | 44.48807 | 0 |
| 15609399 |           | 0 | 0 | 0.000302 | 48.48  | 2.13E-05 | 3 | 4176.1087 | -0.56118 | 37.95982 | 1 |
| 15609399 |           | 0 | 0 | 0.1155   | 48.09  | 4.97E-05 | 2 | 816.45848 | 1.287705 | 19.93664 | 0 |
| 15609399 |           | 0 | 0 | 0.000124 | 40.4   | 0.000141 | 2 | 807.44652 | -0.84406 | 16.61907 | 0 |
| 15609399 | N-Term(A  | 0 | 0 | 0.006148 | 38.76  | 0.000259 | 2 | 1484.7599 | -0.39805 | 22.82213 | 0 |
| 15609399 |           | 0 | 0 | 0.007488 | 34.36  | 0.000971 | 3 | 1442.7487 | -0.90136 | 18.04177 | 0 |
| 15609399 | C11(Carba | 0 | 0 | 0.02809  | 19.73  | 0.021283 | 2 | 1579.8437 | 1.430666 | 33.64612 | 1 |
| 57116962 |           | 0 | 0 | 0.01858  | 34.41  | 0.000561 | 2 | 1134.5541 | 0.232203 | 20.37704 | 0 |
| 57116962 | C1(Carban | 0 | 0 | 0.03353  | 31.31  | 0.001109 | 3 | 1543.7506 | -0.15922 | 28.98583 | 0 |



|          |           |   |   |          |        |          |   |           |          |          |   |
|----------|-----------|---|---|----------|--------|----------|---|-----------|----------|----------|---|
| 15609476 |           | 0 | 0 | 0.007879 | 125.43 | 4.44E-13 | 2 | 1936.9755 | -0.46456 | 42.90806 | 0 |
| 15609476 |           | 0 | 0 | 0.07349  | 96.52  | 3.68E-10 | 2 | 1272.6434 | 0.201821 | 21.90422 | 0 |
| 15609476 |           | 0 | 0 | 0.07268  | 77.18  | 3.54E-08 | 2 | 1381.779  | -0.63906 | 18.82401 | 1 |
| 15609476 | M12(Oxid: | 0 | 0 | 0.1556   | 74.95  | 3.52E-08 | 2 | 1346.6366 | -0.24656 | 16.96627 | 0 |
| 15609476 |           | 0 | 0 | 0.1554   | 62.15  | 9.45E-07 | 3 | 3041.4946 | 1.344971 | 37.8973  | 0 |
| 15609476 |           | 0 | 0 | 0.09805  | 52.23  | 6.58E-06 | 4 | 4295.1198 | 0.931379 | 40.30461 | 1 |
| 15609476 |           | 0 | 0 | 0.356    | 49.89  | 1.54E-05 | 2 | 1330.6407 | -1.04363 | 20.22055 | 0 |
| 15609476 |           | 0 | 0 | 0.3226   | 45.86  | 4.8E-05  | 2 | 1253.6833 | -1.28913 | 19.73199 | 0 |
| 15609476 | M12(Oxid: | 0 | 0 | 0.4127   | 26.55  | 0.002324 | 2 | 1720.8101 | -0.30515 | 15.8971  | 1 |
| 15609482 |           | 0 | 0 | 2.19E-13 | 121.6  | 1.69E-12 | 2 | 1851.9543 | 5.135079 | 36.63778 | 0 |
| 15609482 |           | 0 | 0 | 2.05E-13 | 99.66  | 1.89E-10 | 2 | 1753.8716 | 0.027556 | 48.0447  | 0 |
| 15609482 |           | 0 | 0 | 0.000283 | 92.26  | 1.13E-09 | 3 | 2367.1889 | 0.340767 | 43.01648 | 0 |
| 15609482 | M28(Oxid: | 0 | 0 | 0.000396 | 91.32  | 1.14E-09 | 3 | 4214.0735 | 0.529926 | 42.03777 | 1 |
| 15609482 |           | 0 | 0 | 2.44E-10 | 83.9   | 5.09E-09 | 3 | 4198.0741 | -0.53394 | 43.84723 | 1 |
| 15609482 |           | 0 | 0 | 1.05E-11 | 80.35  | 1.85E-08 | 2 | 2210.1436 | 1.06825  | 34.89256 | 1 |
| 15609482 |           | 0 | 0 | 5.33E-05 | 73.97  | 1.12E-07 | 2 | 903.48924 | -0.25116 | 17.14082 | 0 |
| 15609482 |           | 0 | 0 | 0.000603 | 61.78  | 1.56E-06 | 2 | 1521.8028 | 0.480137 | 28.88847 | 1 |
| 15609482 | M10(Oxid: | 0 | 0 | 1.23E-05 | 60.13  | 2.04E-06 | 2 | 2381.1451 | 0.319523 | 32.41568 | 0 |
| 15609482 |           | 0 | 0 | 9.63E-05 | 59.16  | 2.37E-06 | 2 | 2365.1482 | -0.48637 | 35.9718  | 0 |
| 15609482 |           | 0 | 0 | 5.37E-10 | 49.74  | 2.44E-05 | 3 | 2636.3692 | -1.57282 | 43.6546  | 1 |
| 15609482 |           | 0 | 0 | 2.48E-06 | 49.56  | 2.1E-05  | 3 | 1677.9025 | -0.4001  | 25.96664 | 2 |
| 15609482 |           | 0 | 0 | 0.000196 | 47.33  | 3.51E-05 | 3 | 4354.1894 | 2.754805 | 42.68587 | 2 |
| 15609482 |           | 0 | 0 | 0.1326   | 31.57  | 0.001567 | 2 | 793.43065 | -1.12256 | 12.92676 | 1 |
| 15609482 | M28(Oxid: | 0 | 0 | 1.36E-07 | 30.92  | 0.001416 | 4 | 4370.1754 | 0.706938 | 48.74269 | 2 |
| 15609482 |           | 0 | 0 | 0.0493   | 30.4   | 0.002234 | 2 | 2521.2479 | -1.05542 | 34.21524 | 1 |
| 15609482 | M10(Oxid: | 0 | 0 | 0.1397   | 27.81  | 0.003808 | 3 | 2537.2412 | -1.67199 | 31.97979 | 1 |
| 15609580 |           | 0 | 0 | 0.1733   | 75.13  | 4.3E-08  | 3 | 2080.1059 | -0.71686 | 43.0302  | 0 |
| 15609580 |           | 0 | 0 | 0.29     | 62.4   | 1.06E-06 | 2 | 1359.7476 | -0.20968 | 28.07018 | 1 |
| 15609780 | M3(Oxidat | 0 | 0 | 2.52E-08 | 98.92  | 1.8E-10  | 2 | 1556.784  | -0.67649 | 28.87559 | 0 |
| 15609780 |           | 0 | 0 | 2.27E-08 | 93.26  | 4.71E-10 | 2 | 1340.8158 | 0.739995 | 41.16178 | 0 |
| 15609780 |           | 0 | 0 | 3.82E-12 | 82.2   | 1.33E-08 | 2 | 1376.7532 | -0.07254 | 29.63572 | 0 |
| 15609780 |           | 0 | 0 | 4.59E-10 | 79.94  | 2.08E-08 | 2 | 1540.7898 | -0.18093 | 30.8469  | 0 |
| 15609780 | N-Term(A  | 0 | 0 | 3.85E-10 | 64.2   | 8.93E-07 | 3 | 2096.0901 | -0.80591 | 34.90844 | 1 |
| 15609780 |           | 0 | 0 | 2.49E-06 | 54.69  | 4.75E-06 | 3 | 2038.0823 | -1.9733  | 31.89066 | 1 |
| 15609780 |           | 0 | 0 | 2.44E-08 | 50.15  | 2.13E-05 | 2 | 1804.9682 | -1.30421 | 32.92684 | 1 |
| 15609780 | M3(Oxidat | 0 | 0 | 1.85E-06 | 42.82  | 9.93E-05 | 4 | 2054.0814 | 0.095081 | 30.79669 | 1 |

|          |           |   |   |          |        |          |   |           |          |          |   |
|----------|-----------|---|---|----------|--------|----------|---|-----------|----------|----------|---|
| 15609780 | N-Term(A  | 0 | 0 | 0.000227 | 37.05  | 0.000306 | 3 | 2080.0968 | -0.05837 | 38.87841 | 1 |
| 15609780 |           | 0 | 0 | 0.137    | 36.11  | 0.000404 | 2 | 1104.5448 | -1.66937 | 19.66622 | 1 |
| 15609780 | M1(Oxidat | 0 | 0 | 0.007555 | 34.04  | 0.000454 | 2 | 1120.5406 | -0.92041 | 17.1456  | 1 |
| 15609780 | N-Term(A  | 0 | 0 | 0.001386 | 30.23  | 0.002181 | 2 | 1846.9734 | -4.15276 | 35.13676 | 1 |
| 57117165 | M9(Oxidat | 0 | 0 | 5.8E-16  | 108.36 | 1.46E-11 | 2 | 2104.9175 | 0.592312 | 31.66443 | 0 |
| 57117165 |           | 0 | 0 | 5.8E-16  | 89.61  | 1.42E-09 | 2 | 1900.9546 | 1.781285 | 37.92465 | 0 |
| 57117165 | M19(Oxid. | 0 | 0 | 0.126    | 38.22  | 0.00015  | 2 | 2088.9173 | -1.9543  | 31.17942 | 0 |
| 15609827 |           | 0 | 0 | 5.23E-10 | 108    | 3.8E-11  | 2 | 2171.0948 | 0.36519  | 29.82635 | 0 |
| 15609827 |           | 0 | 0 | 1E-06    | 79.86  | 1.65E-08 | 2 | 1680.8608 | 0.121409 | 33.73466 | 0 |
| 15609827 |           | 0 | 0 | 6.46E-09 | 71.35  | 1.5E-07  | 4 | 2668.3913 | 0.399026 | 34.0085  | 1 |
| 15609827 |           | 0 | 0 | 8.63E-06 | 59.24  | 2.5E-06  | 2 | 1348.7216 | -0.29367 | 18.12818 | 1 |
| 15609827 |           | 0 | 0 | 3.7E-05  | 57.41  | 2.81E-06 | 2 | 1401.7011 | 0.118501 | 27.82784 | 0 |
| 15609827 |           | 0 | 0 | 3.02E-09 | 55.19  | 6.51E-06 | 2 | 2378.2222 | -1.09146 | 46.42046 | 0 |
| 15609827 | M8(Oxidat | 0 | 0 | 1.3E-09  | 52.57  | 1.6E-05  | 3 | 2394.2243 | 1.900831 | 43.06958 | 0 |
| 15609827 |           | 0 | 0 | 6.49E-05 | 52.02  | 7.22E-06 | 2 | 1107.5422 | -0.72182 | 17.28343 | 0 |
| 15609827 |           | 0 | 0 | 2.97E-07 | 51.94  | 7.36E-06 | 3 | 1578.8899 | 0.503135 | 37.79106 | 0 |
| 15609827 |           | 0 | 0 | 0.000287 | 51.37  | 7.28E-06 | 4 | 1797.0863 | 0.279963 | 31.39416 | 1 |
| 15609827 |           | 0 | 0 | 7.4E-05  | 48.01  | 3E-05    | 3 | 2591.3501 | 1.053701 | 42.33923 | 1 |
| 15609827 | M4(Oxidat | 0 | 0 | 0.001989 | 47.44  | 4.51E-05 | 2 | 2410.211  | -1.51696 | 39.19064 | 0 |
| 15609827 | M10(Oxid. | 0 | 0 | 7.58E-07 | 45.6   | 5.78E-05 | 3 | 2607.3389 | -1.30975 | 39.85742 | 1 |
| 15609827 |           | 0 | 0 | 0.000525 | 44.47  | 8.93E-05 | 3 | 2188.1407 | 0.42908  | 33.74858 | 1 |
| 15609827 |           | 0 | 0 | 0.002063 | 42.53  | 0.000131 | 2 | 1898.9939 | -1.68364 | 29.11332 | 1 |
| 15609827 |           | 0 | 0 | 0.000495 | 41.58  | 0.000136 | 2 | 1488.8533 | -0.02164 | 24.47042 | 1 |
| 15609827 |           | 0 | 0 | 0.002149 | 40.92  | 0.000146 | 2 | 1332.7524 | 0.10177  | 26.53558 | 0 |
| 15609827 |           | 0 | 0 | 9.64E-05 | 40.29  | 0.000159 | 4 | 4051.0709 | -0.57707 | 39.02939 | 2 |
| 15609827 |           | 0 | 0 | 0.001592 | 39.14  | 0.000122 | 2 | 966.57268 | -0.46749 | 17.56891 | 0 |
| 15609827 |           | 0 | 0 | 0.000103 | 29.89  | 0.001023 | 2 | 849.52971 | -0.96596 | 27.4762  | 0 |
| 15609885 |           | 0 | 0 | 0.1187   | 130.34 | 2.08E-13 | 2 | 1958.019  | -0.02697 | 28.61219 | 0 |
| 15609885 | M4(Oxidat | 0 | 0 | 0.2164   | 79.69  | 1.24E-08 | 2 | 1178.6573 | 0.880545 | 18.1715  | 1 |
| 15609885 | C10(Carba | 0 | 0 | 0.3544   | 59.05  | 2.86E-06 | 2 | 1233.6623 | 0.189472 | 27.09364 | 0 |
| 15609885 |           | 0 | 0 | 0.2707   | 54.53  | 6.34E-06 | 3 | 2681.4128 | 0.306771 | 32.431   | 1 |
| 15610388 | C1(Carban | 0 | 0 | 0.07718  | 75.34  | 5.12E-08 | 3 | 2807.3857 | 0.751222 | 35.62327 | 0 |
| 15610388 |           | 0 | 0 | 0.1287   | 68.29  | 4E-07    | 2 | 1259.6376 | -0.23853 | 21.65587 | 0 |
| 15610388 |           | 0 | 0 | 0.157    | 61.93  | 8.98E-07 | 2 | 2827.3924 | -0.83105 | 46.69122 | 0 |
| 15610388 | M2(Oxidat | 0 | 0 | 0.1852   | 56.07  | 3.58E-06 | 2 | 2843.3882 | -0.49768 | 46.98901 | 0 |
| 15610388 | M2(Oxidat | 0 | 0 | 0.09889  | 52.75  | 7.17E-06 | 2 | 2859.3777 | -2.38799 | 42.75087 | 0 |

|          |           |   |   |          |        |          |   |           |          |          |   |
|----------|-----------|---|---|----------|--------|----------|---|-----------|----------|----------|---|
| 15610388 |           | 0 | 0 | 0.4645   | 37.13  | 0.000484 | 2 | 1976.0427 | -1.76674 | 24.33787 | 1 |
| 15610388 |           | 0 | 0 | 0.425    | 31.89  | 0.000777 | 2 | 942.5855  | 1.183466 | 17.99532 | 2 |
| 15610388 |           | 0 | 0 | 0.5085   | 29.12  | 0.001222 | 2 | 836.47392 | 0.231032 | 14.89546 | 1 |
| 15610388 |           | 0 | 0 | 0.4851   | 21.03  | 0.00787  | 2 | 990.59734 | 1.752819 | 16.31083 | 1 |
| 15610900 |           | 0 | 0 | 1.27E-05 | 80.5   | 2.23E-08 | 2 | 1270.6999 | -0.26332 | 34.15514 | 0 |
| 15610900 |           | 0 | 0 | 0.1221   | 31.36  | 0.001718 | 2 | 1771.9074 | -0.69703 | 25.24632 | 0 |
| 15610915 |           | 0 | 0 | 5.08E-06 | 69.42  | 1.14E-07 | 2 | 1040.6458 | -0.49176 | 31.01852 | 0 |
| 15610915 |           | 0 | 0 | 0.002292 | 55.54  | 5.86E-06 | 2 | 1547.8077 | 0.764621 | 33.45231 | 0 |
| 15610915 |           | 0 | 0 | 2.83E-10 | 49.15  | 2.61E-05 | 2 | 1059.5406 | -0.49678 | 37.53486 | 0 |
| 15610915 | M5(Oxidat | 0 | 0 | 0.1439   | 44.01  | 6.16E-05 | 2 | 1579.7776 | -0.58287 | 34.05459 | 0 |
| 15611005 |           | 0 | 0 | 0.1777   | 92.38  | 6.07E-10 | 2 | 1489.7242 | -0.01518 | 23.28719 | 0 |
| 15611005 | M5(Oxidat | 0 | 0 | 0.1689   | 82.21  | 6E-09    | 2 | 1737.7795 | 0.322391 | 27.82088 | 0 |
| 15611005 |           | 0 | 0 | 0.2524   | 77.72  | 3.04E-08 | 3 | 2558.3772 | 1.80197  | 42.36358 | 0 |
| 15611005 | M13(Oxid. | 0 | 0 | 0.08311  | 76.15  | 2.91E-08 | 2 | 2030.1224 | 0.34764  | 30.18549 | 0 |
| 15611005 |           | 0 | 0 | 0.1825   | 68.75  | 1.33E-07 | 2 | 1721.7848 | 0.491547 | 28.6114  | 0 |
| 15611005 |           | 0 | 0 | 0.2061   | 67.63  | 1.9E-07  | 2 | 1066.553  | 0.210786 | 26.46687 | 0 |
| 15611005 |           | 0 | 0 | 0.2055   | 67     | 2.79E-07 | 2 | 2014.1275 | 0.37123  | 33.04285 | 0 |
| 15611005 |           | 0 | 0 | 0.1552   | 64.33  | 6.64E-07 | 2 | 1753.9239 | 0.361717 | 33.99631 | 0 |
| 15611005 |           | 0 | 0 | 0.2476   | 59.47  | 3.22E-06 | 2 | 1129.6003 | 0.15583  | 23.48824 | 0 |
| 15611005 | C11(Carba | 0 | 0 | 0.2485   | 57.9   | 3.24E-06 | 3 | 1999.0027 | 2.948152 | 30.28227 | 0 |
| 15611005 |           | 0 | 0 | 0.297    | 57.32  | 2.41E-06 | 2 | 1293.7514 | -0.92052 | 24.31052 | 0 |
| 15611005 |           | 0 | 0 | 0.2323   | 50.88  | 8.15E-06 | 2 | 940.48418 | -0.56656 | 17.63975 | 0 |
| 15611005 |           | 0 | 0 | 0.2668   | 50.72  | 1.57E-05 | 2 | 1817.9006 | -1.29325 | 26.216   | 0 |
| 15611005 |           | 0 | 0 | 0.2117   | 36.4   | 0.000229 | 2 | 1040.6351 | -0.023   | 27.03524 | 0 |
| 15611005 |           | 0 | 0 | 0.2614   | 32.88  | 0.000721 | 3 | 1153.607  | -0.26269 | 16.88893 | 1 |
| 15611013 |           | 0 | 0 | 1.72E-10 | 78.96  | 3.49E-08 | 3 | 2661.3426 | 0.6734   | 40.87763 | 0 |
| 15611013 |           | 0 | 0 | 4.78E-08 | 69.49  | 3.21E-07 | 2 | 2359.2342 | -0.44626 | 41.78415 | 0 |
| 15611013 |           | 0 | 0 | 0.009884 | 38.7   | 0.000155 | 2 | 759.47191 | -0.58055 | 21.95002 | 0 |
| 15611030 |           | 0 | 0 | 5.85E-09 | 116.98 | 4.41E-12 | 3 | 4591.2964 | 0.228375 | 43.20343 | 1 |
| 15611030 |           | 0 | 0 | 9.27E-08 | 80.11  | 2.34E-08 | 2 | 2171.095  | -1.99116 | 32.72424 | 0 |
| 15611030 |           | 0 | 0 | 0.001481 | 72.91  | 5.1E-08  | 2 | 1526.7144 | 1.415961 | 33.07915 | 0 |
| 15611030 |           | 0 | 0 | 7.64E-05 | 59.65  | 1.46E-06 | 2 | 1049.5267 | 0.378863 | 30.62284 | 0 |
| 15611030 | C8(Carban | 0 | 0 | 0.02296  | 57.34  | 1.84E-06 | 2 | 1290.6084 | -1.77379 | 21.12061 | 0 |
| 15611030 |           | 0 | 0 | 5.98E-05 | 56.56  | 5.74E-06 | 2 | 1262.6481 | -0.58006 | 28.22075 | 1 |
| 15611030 | C14(Carba | 0 | 0 | 0.05759  | 41.79  | 6.62E-05 | 3 | 2004.9399 | -0.29019 | 24.44459 | 1 |
| 15611030 |           | 0 | 0 | 2.06E-05 | 40.96  | 8.82E-05 | 3 | 3689.8279 | -0.44645 | 38.35802 | 0 |

|          |           |   |   |          |       |          |   |           |          |          |   |
|----------|-----------|---|---|----------|-------|----------|---|-----------|----------|----------|---|
| 15611030 |           | 0 | 0 | 0.01305  | 34.52 | 0.000901 | 2 | 920.48338 | -0.2893  | 26.6984  | 0 |
| 15611030 | C14(Carba | 0 | 0 | 1.58E-05 | 31.26 | 0.000746 | 4 | 4157.0114 | -2.54078 | 37.08525 | 2 |
| 15611030 | C17(Carba | 0 | 0 | 0.09651  | 27.7  | 0.002802 | 4 | 2437.1891 | 0.066601 | 25.49513 | 2 |
| 15611057 |           | 0 | 0 | 0.000347 | 98.56 | 1.39E-10 | 3 | 3601.5736 | -0.63855 | 18.75213 | 0 |
| 15611057 |           | 0 | 0 | 0.02137  | 28.64 | 0.001364 | 3 | 3757.667  | -2.6708  | 18.40651 | 1 |

| Protein Group | Modificati | $\Delta$ Cn | q-Value | PEP | IonScore | Exp Value | Charge | MH+ [Da] | $\Delta$ M [ppm] | RT [min] | Missed Cleavages |
|---------------|------------|-------------|---------|-----|----------|-----------|--------|----------|------------------|----------|------------------|
|---------------|------------|-------------|---------|-----|----------|-----------|--------|----------|------------------|----------|------------------|

|          |  |   |   |          |        |          |   |           |          |          |   |
|----------|--|---|---|----------|--------|----------|---|-----------|----------|----------|---|
| 15607150 |  | 0 | 0 | 0.004659 | 135.97 | 4.55E-14 | 3 | 3619.8537 | -3.83673 | 45.49051 | 1 |
| 15607150 |  | 0 | 0 | 0.005751 | 100.01 | 1.05E-10 | 2 | 1482.8637 | -0.16606 | 48.11373 | 0 |
| 15607150 |  | 0 | 0 | 0.08067  | 86.9   | 4.19E-09 | 3 | 3234.6588 | -0.44972 | 48.62929 | 0 |
| 15607150 |  | 0 | 0 | 6.47E-05 | 84     | 3.97E-09 | 3 | 2139.2254 | 0.38549  | 37.10605 | 1 |
| 15607150 |  | 0 | 0 | 0.141    | 66.35  | 6.49E-07 | 2 | 1404.7461 | -1.48066 | 26.95729 | 0 |
| 15607150 |  | 0 | 0 | 0.3377   | 39.7   | 0.000182 | 2 | 831.47923 | -0.40493 | 12.06068 | 1 |

| Protein Group | Modificati | $\Delta$ Cn | q-Value | PEP | IonScore | Exp Value | Charge | MH+ [Da] | $\Delta$ M [ppm] | RT [min] | Missed Cleavages |
|---------------|------------|-------------|---------|-----|----------|-----------|--------|----------|------------------|----------|------------------|
|---------------|------------|-------------|---------|-----|----------|-----------|--------|----------|------------------|----------|------------------|

|          |           |   |   |         |       |          |   |           |          |          |   |
|----------|-----------|---|---|---------|-------|----------|---|-----------|----------|----------|---|
| 15607533 |           | 0 | 0 | 0.06903 | 96.08 | 3.33E-10 | 2 | 1815.8831 | -2.28928 | 28.96778 | 0 |
| 15607533 |           | 0 | 0 | 0.0883  | 93.23 | 4.74E-10 | 2 | 1393.6255 | -0.67121 | 19.75921 | 0 |
| 15607533 |           | 0 | 0 | 0.07057 | 72.29 | 7.38E-08 | 2 | 1283.757  | 0.003355 | 32.54902 | 0 |
| 15607533 | M1(Oxidat | 0 | 0 | 0.0921  | 71.79 | 6.61E-08 | 2 | 1409.6203 | -0.77996 | 17.70078 | 0 |
| 15607533 |           | 0 | 0 | 0.06174 | 71.13 | 8.48E-08 | 3 | 2667.4825 | -0.19692 | 41.16794 | 1 |
| 15607533 |           | 0 | 0 | 0.04295 | 70.96 | 1.2E-07  | 2 | 2511.3807 | -0.47721 | 43.40828 | 0 |
| 15607533 | M12(Oxid: | 0 | 0 | 0.2814  | 67.59 | 4.01E-07 | 2 | 1555.8101 | 0.661965 | 41.91245 | 0 |
| 15607533 |           | 0 | 0 | 0.08239 | 60.94 | 1.57E-06 | 2 | 1226.6873 | -1.59604 | 27.48663 | 0 |
| 15607533 | M14(Oxid: | 0 | 0 | 0.145   | 51.03 | 7.87E-06 | 2 | 1717.9902 | -1.19116 | 34.72686 | 0 |
| 15607533 |           | 0 | 0 | 0.2047  | 48.78 | 2.45E-05 | 2 | 1045.5519 | -0.52013 | 26.86565 | 0 |
| 15607533 |           | 0 | 0 | 0.279   | 44.22 | 8.14E-05 | 2 | 1112.6572 | 0.845535 | 26.54247 | 0 |
| 15607533 |           | 0 | 0 | 0.2454  | 37.69 | 0.00017  | 2 | 1701.9985 | 0.687066 | 37.10055 | 0 |
| 15607533 | M12(Oxid: | 0 | 0 | 0.1205  | 35.59 | 0.000663 | 4 | 2905.5128 | -0.50876 | 38.36481 | 0 |
| 15607533 |           | 0 | 0 | 0.2734  | 27.39 | 0.004104 | 2 | 2101.0293 | -0.77906 | 26.37076 | 1 |

| Protein Group | Modificati | $\Delta$ Cn | q-Value | PEP | IonScore | Exp Value | Charge | MH+ [Da] | $\Delta$ M [ppm] | RT [min] | Missed Cleavages |
|---------------|------------|-------------|---------|-----|----------|-----------|--------|----------|------------------|----------|------------------|
|---------------|------------|-------------|---------|-----|----------|-----------|--------|----------|------------------|----------|------------------|

|          |           |   |   |          |        |          |   |           |          |          |   |
|----------|-----------|---|---|----------|--------|----------|---|-----------|----------|----------|---|
| 15607898 |           | 0 | 0 | 2.63E-14 | 118.52 | 3.02E-12 | 2 | 1779.9113 | -0.61734 | 41.17775 | 0 |
| 15607898 | M19(Oxid: | 0 | 0 | 6.38E-14 | 112.77 | 5.27E-12 | 3 | 3207.479  | 1.290959 | 34.94491 | 1 |
| 15607898 |           | 0 | 0 | 1.85E-09 | 98.26  | 2.91E-10 | 2 | 2097.0696 | -0.71224 | 45.90267 | 0 |
| 15607898 |           | 0 | 0 | 8.97E-11 | 94.82  | 3.29E-10 | 2 | 2660.202  | 0.973834 | 33.13654 | 0 |
| 15607898 |           | 0 | 0 | 4.55E-08 | 91.86  | 8.47E-10 | 2 | 1441.8447 | -0.09655 | 43.99313 | 0 |
| 15607898 |           | 0 | 0 | 7.76E-14 | 90.52  | 1.46E-09 | 3 | 3590.8714 | -1.158   | 41.83492 | 0 |
| 15607898 | M19(Oxid: | 0 | 0 | 8.29E-13 | 90.41  | 9.08E-10 | 3 | 2676.191  | -1.24213 | 29.68399 | 0 |
| 15607898 | M1(Oxidat | 0 | 0 | 4.09E-10 | 89.91  | 1.48E-09 | 2 | 1457.8396 | -0.04053 | 45.00327 | 0 |

|              |           |   |   |          |       |          |   |           |          |          |   |
|--------------|-----------|---|---|----------|-------|----------|---|-----------|----------|----------|---|
| 15607898     |           | 0 | 0 | 5.81E-10 | 87.62 | 3.2E-09  | 2 | 1537.7969 | -0.03817 | 34.45873 | 0 |
| 15607898     |           | 0 | 0 | 9.82E-08 | 77.95 | 3.61E-08 | 3 | 2253.1741 | 0.827774 | 32.92234 | 1 |
| 15608172;156 |           | 0 | 0 | 7.82E-08 | 73.59 | 9.63E-08 | 2 | 1316.6587 | -0.49542 | 24.31009 | 0 |
| 15607898     |           | 0 | 0 | 6.16E-10 | 72.02 | 1.35E-07 | 2 | 2314.2127 | -1.04451 | 38.66034 | 0 |
| 15607898     | M8(Oxidat | 0 | 0 | 3.26E-05 | 68.02 | 2.6E-07  | 2 | 1543.8633 | 0.5004   | 31.55365 | 0 |
| 15607898     |           | 0 | 0 | 1.25E-07 | 67.79 | 2.66E-07 | 2 | 1527.8678 | 0.133618 | 37.19997 | 0 |
| 15607898     |           | 0 | 0 | 9.44E-09 | 62.03 | 1.16E-06 | 2 | 2035.0523 | -2.20516 | 25.94058 | 0 |
| 15607898     |           | 0 | 0 | 7.51E-06 | 59    | 3.34E-06 | 3 | 2223.1628 | 0.495951 | 36.496   | 1 |
| 15607898     |           | 0 | 0 | 2.74E-07 | 58.07 | 3.51E-06 | 3 | 2470.3145 | -0.70599 | 35.30825 | 1 |
| 15607898     | N-Term(A  | 0 | 0 | 0.000497 | 54.32 | 5.73E-06 | 2 | 1483.8537 | -1.12613 | 48.7345  | 0 |
| 15607898     | M4(Oxidat | 0 | 0 | 0.000163 | 52.79 | 1.29E-05 | 2 | 906.47063 | -0.83582 | 28.57275 | 0 |
| 15607898     |           | 0 | 0 | 2.65E-05 | 52.21 | 1.47E-05 | 3 | 2470.3181 | 0.776453 | 37.36199 | 1 |
| 15607898     | M8(Oxidat | 0 | 0 | 2.49E-05 | 47.91 | 2.91E-05 | 3 | 2230.2088 | -1.09446 | 41.93747 | 1 |
| 15607898     | N-Term(A  | 0 | 0 | 2.04E-05 | 46.35 | 4.75E-05 | 3 | 2356.2271 | 0.623738 | 43.09678 | 0 |
| 15607898     |           | 0 | 0 | 0.004975 | 45.34 | 6.29E-05 | 2 | 801.4821  | -1.00818 | 21.09463 | 0 |
| 15608172;156 | M1(Oxidat | 0 | 0 | 0.002642 | 42.09 | 9.89E-05 | 3 | 1619.7934 | -1.54103 | 21.73065 | 1 |
| 15607898     |           | 0 | 0 | 0.000104 | 40.42 | 0.000191 | 3 | 2366.2549 | -0.58926 | 34.35999 | 1 |
| 15607898     | C33(Carba | 0 | 0 | 3.03E-06 | 36.28 | 0.000377 | 3 | 3461.7077 | -2.19906 | 42.59772 | 0 |
| 15607898     |           | 0 | 0 | 0.06412  | 35.6  | 0.000372 | 2 | 855.43584 | -0.14342 | 25.02374 | 0 |
| 15607898     |           | 0 | 0 | 0.04075  | 35.48 | 0.000878 | 2 | 890.47637 | -0.1183  | 27.02932 | 0 |
| 15607898     | C10(Carba | 0 | 0 | 0.1299   | 28.1  | 0.00302  | 3 | 1379.7211 | -0.13902 | 21.10854 | 0 |
| 15607898     | N-Term(A  | 0 | 0 | 0.07816  | 27.78 | 0.003418 | 2 | 1499.8509 | 0.404291 | 43.55904 | 0 |
| 15607898     |           | 0 | 0 | 0.1167   | 26.45 | 0.003963 | 4 | 2969.4601 | 0.017651 | 29.22018 | 0 |
| 15607898     |           | 0 | 0 | 0.08802  | 20.31 | 0.01257  | 2 | 2099.1243 | -0.06961 | 30.69439 | 1 |

| Protein  | Group     | Modificati | ΔCn | q-Value | PEP | IonScore | Exp Value | Charge   | MH+ [Da] | ΔM [ppm]  | RT [min] | Missed Cleavages |   |
|----------|-----------|------------|-----|---------|-----|----------|-----------|----------|----------|-----------|----------|------------------|---|
| 57116780 |           |            |     | 0       | 0   | 0.1295   | 132.49    | 1.35E-13 | 2        | 1955.023  | 1.087208 | 43.14178         | 0 |
| 57116780 | M8(Oxidat |            |     | 0       | 0   | 0.0303   | 120.48    | 2.37E-12 | 2        | 1971.016  | 0.128111 | 48.95236         | 0 |
| 57116780 | M9(Oxidat |            |     | 0       | 0   | 0.321    | 80.31     | 2E-08    | 2        | 2329.1727 | 0.909645 | 44.53406         | 0 |
| 57116780 | C3(Carban |            |     | 0       | 0   | 0.08742  | 77.34     | 1.84E-08 | 2        | 1544.6698 | 0.778227 | 24.0885          | 0 |
| 57116780 | M9(Oxidat |            |     | 0       | 0   | 0.05061  | 76.96     | 5.94E-08 | 3        | 2901.4634 | 0.353876 | 42.641           | 1 |
| 57116780 | M34(Oxid. |            |     | 0       | 0   | 0.0835   | 67.78     | 3.58E-07 | 3        | 4168.1114 | -0.47335 | 31.88748         | 0 |
| 57116780 |           |            |     | 0       | 0   | 0.2521   | 66.37     | 6.11E-07 | 2        | 2313.1783 | 1.145158 | 44.5669          | 0 |
| 57116780 |           |            |     | 0       | 0   | 0.4991   | 61.64     | 2.02E-06 | 3        | 2885.4688 | 0.454988 | 44.40164         | 1 |
| 57116780 |           |            |     | 0       | 0   | 0.3958   | 53.23     | 7.37E-06 | 3        | 4152.1153 | -0.75907 | 33.44992         | 0 |
| 57116780 | N-Term(A  |            |     | 0       | 0   | 0.3989   | 33.57     | 0.000681 | 3        | 2371.1819 | 0.344815 | 41.39873         | 0 |
| 57116780 | C5(Carban |            |     | 0       | 0   | 0.4503   | 13.26     | 0.063729 | 5        | 4598.3037 | 0.213527 | 48.34713         | 0 |

| Protein Group | Modification | $\Delta$ Cn | q-Value | PEP        | IonScore | Exp Value | Charge | MH+ [Da]  | $\Delta$ M [ppm] | RT [min] | Missed Cleavages |
|---------------|--------------|-------------|---------|------------|----------|-----------|--------|-----------|------------------|----------|------------------|
| 15608144      | M6(Oxidat    |             | 0       | 0 3.78E-11 | 89.86    | 1.03E-09  | 3      | 4920.6075 | -0.17056         | 38.03296 | 0                |
| 15608144      | C6(Carban    |             | 0       | 0 3.64E-09 | 81.3     | 7.4E-09   | 2      | 1466.6119 | 0.480499         | 12.52906 | 0                |
| 15608144      |              |             | 0       | 0 0.09153  | 16.13    | 0.02432   | 5      | 4904.6211 | 1.561733         | 39.16704 | 0                |
| Protein Group | Modification | $\Delta$ Cn | q-Value | PEP        | IonScore | Exp Value | Charge | MH+ [Da]  | $\Delta$ M [ppm] | RT [min] | Missed Cleavages |
| 15608172      |              |             | 0       | 0 0.002386 | 114.7    | 4.91E-12  | 2      | 2052.9822 | -0.54845         | 29.19319 | 0                |
| 15608172      | M1(Oxidat    |             | 0       | 0 0.05562  | 93.15    | 5.57E-10  | 2      | 1531.8752 | -0.85296         | 38.74747 | 0                |
| 15608172      |              |             | 0       | 0 0.003414 | 92.61    | 5.47E-10  | 2      | 1701.006  | 0.104493         | 39.95024 | 0                |
| 15608172      |              |             | 0       | 0 0.1048   | 88.57    | 3.47E-09  | 2      | 1503.8163 | -0.19917         | 35.41361 | 0                |
| 15608172      | M11(Oxid:    |             | 0       | 0 0.02277  | 88.52    | 1.97E-09  | 3      | 2427.1827 | 0.229103         | 26.19492 | 0                |
| 15608172      |              |             | 0       | 0 0.004873 | 82.03    | 1.1E-08   | 3      | 2261.1288 | 0.772179         | 25.53896 | 0                |
| 15608172      |              |             | 0       | 0 0.04706  | 81.92    | 7.71E-09  | 2      | 1763.8429 | -0.9968          | 27.39812 | 0                |
| 15608172      |              |             | 0       | 0 0.07949  | 81.25    | 7.48E-09  | 2      | 1509.7292 | -0.07135         | 21.48954 | 0                |
| 15608172      |              |             | 0       | 0 0.03214  | 79.62    | 2.29E-08  | 2      | 1395.7022 | 0.41179          | 25.59095 | 0                |
| 15608172      |              |             | 0       | 0 0.08929  | 69.43    | 2.05E-07  | 2      | 1293.6905 | -0.43597         | 26.54617 | 0                |
| 15608172      | M12(Oxid:    |             | 0       | 0 0.01981  | 65.66    | 3.8E-07   | 3      | 2583.2816 | -0.65303         | 26.30525 | 1                |
| 15608172      |              |             | 0       | 0 0.03859  | 55.18    | 6.67E-06  | 2      | 1316.6593 | -0.03186         | 22.95008 | 0                |
| 15608172      | M1(Oxidat    |             | 0       | 0 0.2477   | 48.55    | 2.37E-05  | 2      | 1619.7957 | -0.13854         | 22.61061 | 1                |
| 15608172      |              |             | 0       | 0 0.09149  | 45.94    | 4.71E-05  | 3      | 3429.6643 | -0.83143         | 34.23113 | 1                |
| 15608172      | C7(Carban    |             | 0       | 0 0.1844   | 42.25    | 5.96E-05  | 3      | 3289.5725 | 1.266907         | 40.60222 | 0                |
| 15608172      | M2(Oxidat    |             | 0       | 0 0.2042   | 41.19    | 7.59E-05  | 3      | 1687.9766 | -0.59222         | 41.32914 | 1                |
| 15608172      |              |             | 0       | 0 0.1456   | 36.02    | 0.0004    | 3      | 3248.6404 | -0.96573         | 36.59938 | 1                |
| 15608172      |              |             | 0       | 0 0.3302   | 21.38    | 0.017103  | 3      | 1979.0297 | -0.44671         | 29.23893 | 1                |
| Protein Group | Modification | $\Delta$ Cn | q-Value | PEP        | IonScore | Exp Value | Charge | MH+ [Da]  | $\Delta$ M [ppm] | RT [min] | Missed Cleavages |
| 15608492      |              |             | 0       | 0 5.25E-16 | 77.93    | 4.43E-08  | 2      | 1499.8211 | -0.4259          | 40.43769 | 0                |
| 15608492      |              |             | 0       | 0 5.25E-16 | 75.85    | 3.12E-08  | 3      | 2597.2556 | 1.423844         | 36.61773 | 0                |
| Protein Group | Modification | $\Delta$ Cn | q-Value | PEP        | IonScore | Exp Value | Charge | MH+ [Da]  | $\Delta$ M [ppm] | RT [min] | Missed Cleavages |
| 15608556      |              |             | 0       | 0 0.01226  | 83.72    | 1.08E-08  | 2      | 1090.5644 | 0.318508         | 19.48068 | 0                |
| 15608556      |              |             | 0       | 0 0.009006 | 78.27    | 5.21E-08  | 2      | 1171.6474 | 3.725665         | 18.35078 | 0                |
| 15608556      |              |             | 0       | 0 6.35E-10 | 55.04    | 7.52E-06  | 3      | 2116.0821 | 1.826554         | 31.18826 | 1                |
| 15608556      |              |             | 0       | 0 0.000318 | 51.95    | 1.85E-05  | 4      | 2343.2152 | -0.54226         | 27.66431 | 2                |
| 15608556      |              |             | 0       | 0 0.00016  | 47.18    | 4.69E-05  | 2      | 1271.6734 | 2.418972         | 21.31119 | 1                |
| 15608556      |              |             | 0       | 0 0.00031  | 36.55    | 0.000564  | 2      | 1044.5313 | -0.74072         | 24.39332 | 0                |
| 15608556      | C14(Carba    |             | 0       | 0 0.06377  | 26.12    | 0.003909  | 3      | 2259.0979 | -1.045           | 37.03779 | 0                |
| Protein Group | Modification | $\Delta$ Cn | q-Value | PEP        | IonScore | Exp Value | Charge | MH+ [Da]  | $\Delta$ M [ppm] | RT [min] | Missed Cleavages |
| 15609398      |              |             | 0       | 0 0.0129   | 110.24   | 2.18E-11  | 3      | 3681.8987 | -7.15298         | 35.34178 | 1                |

|                          |           |         |     |          |           |          |          |           |          |                  |   |
|--------------------------|-----------|---------|-----|----------|-----------|----------|----------|-----------|----------|------------------|---|
| 15609398                 |           | 0       | 0   | 0.03709  | 104.22    | 7.19E-11 | 2        | 2258.1033 | -0.69183 | 31.9073          | 0 |
| 15609398                 |           | 0       | 0   | 0.06174  | 84.48     | 7.66E-09 | 3        | 3246.6943 | 1.105049 | 36.79667         | 0 |
| 15609398                 | M10(Oxid. | 0       | 0   | 0.06708  | 65.02     | 8.18E-07 | 3        | 2010.0024 | 1.088152 | 36.49417         | 0 |
| 15609398                 |           | 0       | 0   | 0.2372   | 43.63     | 0.000139 | 3        | 1994.009  | 1.883151 | 38.23623         | 0 |
| Protein Group Modificati | ΔCn       | q-Value | PEP | IonScore | Exp Value | Charge   | MH+ [Da] | ΔM [ppm]  | RT [min] | Missed Cleavages |   |
| 15609455                 |           | 0       | 0   | 0.3567   | 83.71     | 1.13E-08 | 2        | 1677.8472 | -0.6471  | 36.33354         | 0 |
| 15609455                 |           | 0       | 0   | 0.07534  | 57.2      | 4.29E-06 | 2        | 1304.6634 | -0.03344 | 30.72633         | 0 |
| 15609455                 |           | 0       | 0   | 0.06946  | 42.09     | 0.00013  | 2        | 1588.8459 | -1.52218 | 40.57957         | 0 |
| 15609455                 | M9(Oxidat | 0       | 0   | 0.2367   | 27.13     | 0.002905 | 3        | 1375.6644 | 0.63644  | 21.15603         | 0 |
| Protein Group Modificati | ΔCn       | q-Value | PEP | IonScore | Exp Value | Charge   | MH+ [Da] | ΔM [ppm]  | RT [min] | Missed Cleavages |   |
| 15610051                 |           | 0       | 0   | 2.2E-13  | 93.51     | 1.05E-09 | 2        | 1870.93   | 2.430844 | 26.91898         | 0 |
| 15610051                 |           | 0       | 0   | 1.2E-18  | 92.82     | 1.04E-09 | 3        | 2830.4293 | 1.195263 | 38.02902         | 0 |
| 15610051                 |           | 0       | 0   | 6.35E-12 | 91.06     | 2.12E-09 | 3        | 2447.2767 | 0.668178 | 26.00805         | 1 |
| 15610051                 |           | 0       | 0   | 1.97E-08 | 80.17     | 1.78E-08 | 2        | 2310.2229 | -0.54251 | 42.6764          | 0 |
| 15610051                 |           | 0       | 0   | 2.97E-06 | 69.74     | 3.5E-07  | 2        | 759.43566 | -0.41582 | 20.56123         | 0 |
| 15610051                 |           | 0       | 0   | 0.01458  | 45.19     | 5.6E-05  | 3        | 1625.8969 | -0.09629 | 26.5822          | 1 |
| Protein Group Modificati | ΔCn       | q-Value | PEP | IonScore | Exp Value | Charge   | MH+ [Da] | ΔM [ppm]  | RT [min] | Missed Cleavages |   |
| 15610526                 | M11(Oxid. | 0       | 0   | 0.1629   | 82.92     | 6.13E-09 | 2        | 2793.3353 | -0.30559 | 27.99399         | 1 |
| 15610526                 |           | 0       | 0   | 0.1386   | 70.26     | 9.4E-08  | 2        | 2621.2356 | -1.68928 | 32.7612          | 0 |
| 15610526                 |           | 0       | 0   | 0.0358   | 70        | 2.55E-07 | 2        | 1298.7217 | 0.089308 | 29.70408         | 0 |
| 15610526                 | M10(Oxid. | 0       | 0   | 0.2951   | 58.3      | 1.48E-06 | 2        | 2637.2332 | -0.67662 | 30.73744         | 0 |
| 15610526                 |           | 0       | 0   | 0.3889   | 51.94     | 1.63E-05 | 2        | 987.5258  | -0.05758 | 27.44552         | 0 |
| 15610526                 | N-Term(A  | 0       | 0   | 0.1227   | 46.43     | 5.69E-05 | 2        | 1340.7314 | -0.60076 | 36.26636         | 0 |
| 15610526                 |           | 0       | 0   | 0.1666   | 43.42     | 7.96E-05 | 3        | 1891.0131 | -0.74861 | 27.05699         | 1 |
| 15610526                 |           | 0       | 0   | 0.4434   | 30.26     | 0.001978 | 3        | 1533.8379 | -0.37002 | 28.66216         | 0 |
| Protein Group Modificati | ΔCn       | q-Value | PEP | IonScore | Exp Value | Charge   | MH+ [Da] | ΔM [ppm]  | RT [min] | Missed Cleavages |   |
| 15610628                 |           | 0       | 0   | 3.92E-08 | 72.94     | 8.13E-08 | 2        | 1608.8633 | 0.060632 | 35.79819         | 0 |
| 15610628                 |           | 0       | 0   | 2.36E-05 | 63.99     | 8.18E-07 | 2        | 975.48503 | -0.42886 | 11.19708         | 0 |
| 15610628                 |           | 0       | 0   | 1.16E-08 | 58.35     | 1.75E-06 | 3        | 2287.1056 | -0.37924 | 36.57931         | 0 |
| 15610628                 | N-Term(A  | 0       | 0   | 0.000925 | 52.75     | 8.49E-06 | 2        | 1650.8741 | 0.166419 | 40.37867         | 0 |
| 15610628                 |           | 0       | 0   | 7.06E-05 | 48.31     | 4.65E-05 | 2        | 2269.1832 | -1.42264 | 34.16858         | 1 |
| 15610628                 | M3(Oxidat | 0       | 0   | 3.71E-06 | 44.88     | 3.9E-05  | 3        | 2303.1004 | -0.42132 | 33.16096         | 0 |
| 15610628                 |           | 0       | 0   | 0.00079  | 40.91     | 0.000199 | 2        | 1141.6214 | 0.143821 | 20.73377         | 0 |
| 15610628                 | N-Term(A  | 0       | 0   | 0.03467  | 32.3      | 0.001119 | 3        | 2867.4518 | -4.58803 | 39.27962         | 1 |
| Protein Group Modificati | ΔCn       | q-Value | PEP | IonScore | Exp Value | Charge   | MH+ [Da] | ΔM [ppm]  | RT [min] | Missed Cleavages |   |
| 15610586                 |           | 0       | 0   | 5.68E-08 | 104.13    | 4.64E-11 | 2        | 1799.846  | 0.718708 | 49.50438         | 0 |

|          |           |   |       |          |       |          |   |           |          |          |   |
|----------|-----------|---|-------|----------|-------|----------|---|-----------|----------|----------|---|
| 15610586 |           | 0 | 0     | 2.15E-05 | 91.61 | 8.63E-10 | 2 | 1594.8975 | 1.415286 | 39.64271 | 0 |
| 15610586 |           | 0 | 0     | 7.83E-05 | 86.37 | 2.77E-09 | 2 | 1325.7217 | 0.33641  | 28.88325 | 0 |
| 15610586 |           | 0 | 0     | 4.64E-08 | 85.37 | 6.1E-09  | 2 | 2333.221  | 0.040101 | 21.30353 | 1 |
| 15610586 |           | 0 | 0     | 6.03E-12 | 83.47 | 6.07E-09 | 2 | 1897.0627 | -1.49264 | 31.62262 | 0 |
| 15610586 |           | 0 | 0     | 4.17E-07 | 82.93 | 5.08E-09 | 2 | 1427.8373 | 0.228718 | 49.08605 | 0 |
| 15610586 | N-Term(A  | 0 | 0     | 1.88E-09 | 81.52 | 9.51E-09 | 2 | 1469.8489 | 0.924076 | 41.69639 | 0 |
| 15610586 |           | 0 | 0     | 1.76E-07 | 79.13 | 3.73E-08 | 2 | 2177.1207 | 0.400422 | 22.57025 | 0 |
| 15610586 | C6(Carban | 0 | 0     | 1.48E-08 | 78.09 | 3.65E-08 | 2 | 1899.9773 | 1.42487  | 29.81496 | 0 |
| 15610586 |           | 0 | 0     | 1.29E-10 | 75.82 | 3.27E-08 | 3 | 2446.3462 | 0.30381  | 37.36198 | 0 |
| 15610586 |           | 0 | 0     | 1.16E-12 | 75.14 | 3.05E-08 | 3 | 2351.3293 | -0.63093 | 30.87692 | 1 |
| 15610586 |           | 0 | 0     | 0.01995  | 72.38 | 1.47E-07 | 2 | 1691.8876 | 0.685353 | 31.09715 | 0 |
| 15610586 |           | 0 | 0     | 0.000269 | 69.07 | 1.98E-07 | 2 | 1055.6194 | -1.32523 | 27.4549  | 0 |
| 15610586 |           | 0 | 0     | 5.65E-07 | 60.41 | 9.1E-07  | 3 | 1750.9971 | 0.418713 | 36.01324 | 1 |
| 15610586 |           | 0 | 0     | 4.44E-06 | 56.57 | 4.41E-06 | 2 | 1957.9927 | -2.63429 | 49.56457 | 0 |
| 15610586 |           | 0 | 0     | 3.6E-07  | 56    | 4.4E-06  | 3 | 2567.3369 | 0.131231 | 34.51873 | 1 |
| 15610586 |           | 0 | 0     | 4.33E-07 | 52.7  | 9.94E-06 | 3 | 2170.0765 | -0.51663 | 28.94113 | 1 |
| 15610586 |           | 0 | 0     | 0.000571 | 51.94 | 7.04E-06 | 2 | 1023.5469 | -0.04758 | 22.04702 | 0 |
| 15610586 |           | 0 | 0     | 0.0181   | 42.75 | 5.3E-05  | 4 | 3753.0561 | 1.915687 | 39.97249 | 1 |
| 15610586 |           | 0 | 0     | 0.001211 | 41.93 | 0.000176 | 3 | 1896.9767 | -0.42363 | 23.91108 | 1 |
| 15610586 |           | 0 | 0     | 0.01756  | 15.02 | 0.073972 | 3 | 2756.4724 | -0.25215 | 48.14734 | 0 |
| 15610586 | N-Term(A  | 0 | 0     | 0.009845 | 13.55 | 0.066236 | 3 | 2488.3579 | 0.762339 | 44.11629 | 0 |
| 15610586 |           | 0 | 0.004 | 0.06748  | 55.52 | 7.01E-06 | 2 | 1610.8248 | 0.107603 | 18.02401 | 1 |
| 15610586 |           | 0 | 0.004 | 0.02581  | 41.44 | 8.97E-05 | 2 | 894.46733 | -0.73624 | 18.25013 | 0 |
| 15610586 | N-Term(A  | 0 | 0.004 | 0.05355  | 34.04 | 0.000434 | 2 | 1636.9065 | 0.443177 | 45.48535 | 0 |
| 15610586 |           | 0 | 0.004 | 0.03183  | 19.23 | 0.011912 | 3 | 1798.073  | 1.723992 | 38.2686  | 1 |

| Protein Group | Modification | $\Delta C_n$ | q-Value | PEP | IonScore | Exp Value | Charge   | MH+ [Da] | $\Delta M$ [ppm] | RT [min] | Missed Cleavages |   |
|---------------|--------------|--------------|---------|-----|----------|-----------|----------|----------|------------------|----------|------------------|---|
| 57117132      | M13(Oxid:    |              | 0       | 0   | 6.21E-16 | 108.22    | 2.64E-11 | 2        | 1546.7536        | 0.330588 | 26.89217         | 0 |
| 57117132      |              |              | 0       | 0   | 6.21E-16 | 97.06     | 1.96E-10 | 2        | 1701.7721        | 0.341424 | 27.63737         | 0 |
| 57117132      |              |              | 0       | 0   | 1.44E-15 | 89.46     | 1.76E-09 | 2        | 1530.7576        | -0.35626 | 31.62952         | 0 |
| 57117132      |              |              | 0       | 0   | 6.21E-16 | 76.76     | 2.42E-08 | 3        | 2989.4165        | -0.78754 | 31.18452         | 1 |
| 57117132      |              |              | 0       | 0   | 6.21E-16 | 73.21     | 4.76E-08 | 2        | 2762.2837        | 1.13953  | 32.07409         | 0 |
| 57117132      | M20(Oxid:    |              | 0       | 0   | 6.21E-16 | 69.99     | 1E-07    | 3        | 2964.39          | -0.21877 | 22.7696          | 0 |
| 57117132      |              |              | 0       | 0   | 2.53E-08 | 61.4      | 1.81E-06 | 3        | 2791.3886        | 0.997243 | 32.88339         | 1 |
| 57117132      | M26(Oxid:    |              | 0       | 0   | 1.26E-13 | 59.11     | 1.22E-06 | 4        | 3681.723         | 0.466322 | 20.39136         | 1 |
| 57117132      |              |              | 0       | 0   | 1.04E-06 | 57.45     | 3.33E-06 | 2        | 2000.9864        | -0.09774 | 27.57074         | 0 |
| 57117132      |              |              | 0       | 0   | 6.21E-16 | 55.97     | 2.53E-06 | 5        | 2918.3876        | 2.011111 | 30.69346         | 1 |



|          |           |          |         |          |       |          |   |           |          |          |   |
|----------|-----------|----------|---------|----------|-------|----------|---|-----------|----------|----------|---|
| 57117132 |           | 0        | 0       | 2.04E-11 | 54.08 | 8.01E-06 | 4 | 2191.1256 | 0.63883  | 33.65463 | 0 |
| 57117132 |           | 0        | 0       | 2.92E-06 | 53.64 | 8E-06    | 2 | 973.5421  | -0.48326 | 17.58908 | 1 |
| 57117132 |           | 0        | 0       | 3.49E-05 | 49.49 | 2.19E-05 | 2 | 2454.2845 | -1.27527 | 35.71847 | 0 |
| 57117132 |           | 0        | 0       | 8.77E-16 | 47.55 | 3.16E-05 | 5 | 3145.5211 | 0.353865 | 29.59298 | 2 |
| 57117132 | M20(Oxid. | 0        | 0       | 6.21E-16 | 43.13 | 7.78E-05 | 4 | 3120.4931 | 0.418651 | 21.92896 | 1 |
| 57117132 | M18(Oxid. | 0        | 0       | 0.0034   | 33.37 | 0.000713 | 3 | 2274.0838 | 0.782347 | 28.52223 | 1 |
| 57117132 | M26(Oxid. | 0        | 0       | 1.65E-06 | 24.9  | 0.003228 | 5 | 3837.8187 | -0.9676  | 20.0733  | 2 |
|          | 2         | 1025.485 | -0.0009 | 0        | 29.25 | 0.0012   | R |           |          |          |   |
|          | 2         | 1174.566 | 0.0008  | 0        | 60.17 | 9.60E-07 | K |           |          |          |   |
|          | 2         | 1379.804 | -0.0027 | 0        | 28.69 | 0.0014   | R |           |          |          |   |
|          | 2         | 1481.751 | -0.0018 | 0        | 45.98 | 2.50E-05 | R |           |          |          |   |
|          | 2         | 1552.785 | -0.0019 | 0        | 94.83 | 4.10E-10 | R |           |          |          |   |

| Protein  | Group    | Modificati | ΔCn | q-Value | PEP   | IonScore | Exp Value | Charge   | MH+ [Da] | ΔM [ppm]  | RT [min] | Missed Cleavages |   |
|----------|----------|------------|-----|---------|-------|----------|-----------|----------|----------|-----------|----------|------------------|---|
| 15608836 |          |            |     | 0       | 0     | 2.96E-13 | 103.02    | 9.48E-11 | 2        | 1492.7387 | -0.28554 | 34.41907         | 0 |
| 15608836 |          |            |     | 0       | 0     | 4.65E-16 | 95.63     | 6.56E-10 | 2        | 2586.3482 | -0.04994 | 35.40654         | 0 |
| 15608836 |          |            |     | 0       | 0     | 3.41E-14 | 89.7      | 2.36E-09 | 2        | 1749.876  | -0.38125 | 27.98114         | 1 |
| 15608836 |          |            |     | 0       | 0     | 5.18E-12 | 88.21     | 1.51E-09 | 2        | 1454.6751 | -0.51893 | 19.04716         | 0 |
| 15608836 |          |            |     | 0       | 0     | 4.65E-16 | 87.21     | 4.66E-09 | 3        | 2857.4731 | -1.16701 | 35.02559         | 1 |
| 15608836 |          |            |     | 0       | 0     | 2.4E-06  | 77.59     | 4.01E-08 | 2        | 2051.0909 | -0.60133 | 37.0105          | 1 |
| 15608836 |          |            |     | 0       | 0     | 1.23E-14 | 69.47     | 1.86E-07 | 2        | 1687.9235 | 0.561763 | 28.51091         | 0 |
| 15608836 |          |            |     | 0       | 0     | 7.96E-10 | 69.08     | 2.16E-07 | 3        | 1384.7281 | -0.80071 | 16.10278         | 0 |
| 15608836 |          |            |     | 0       | 0     | 1.01E-09 | 67.18     | 4.79E-07 | 3        | 2677.367  | -0.37826 | 38.6042          | 0 |
| 15608836 |          |            |     | 0       | 0     | 4.37E-15 | 66.59     | 6.58E-07 | 2        | 816.47301 | 0.376895 | 22.09373         | 0 |
| 15608836 |          |            |     | 0       | 0     | 0.002966 | 59.97     | 1.31E-06 | 3        | 3218.6667 | 0.431814 | 39.90472         | 0 |
| 15608836 |          |            |     | 0       | 0     | 4.65E-16 | 55.72     | 3.75E-06 | 2        | 1211.606  | 0.374156 | 24.10176         | 0 |
| 15608836 |          |            |     | 0       | 0     | 2.91E-13 | 55.14     | 4.13E-06 | 2        | 1628.9284 | 3.186773 | 27.7251          | 1 |
| 15608836 | N-Term(A |            |     | 0       | 0     | 4.65E-16 | 54.41     | 7.24E-06 | 2        | 1791.8989 | 6.470795 | 27.9955          | 1 |
| 15608836 |          |            |     | 0       | 0     | 0.007602 | 50.01     | 2.19E-05 | 2        | 1636.8282 | -0.49407 | 25.73234         | 1 |
| 15608836 |          |            |     | 0       | 0     | 1.48E-07 | 39.02     | 0.000163 | 2        | 1023.5099 | -0.63117 | 26.87124         | 0 |
| 15608836 |          |            |     | 0       | 0     | 0.003236 | 17.62     | 0.019028 | 4        | 4887.5358 | -7.01048 | 43.03783         | 1 |
| 15608836 |          |            |     | 0       | 0.004 | 0.05616  | 57.4      | 4.09E-06 | 2        | 831.46807 | -0.33209 | 18.12526         | 0 |
| 15608836 |          |            |     | 0       | 0.004 | 0.05616  | 54.29     | 1.01E-05 | 2        | 858.50505 | 0.770155 | 28.09748         | 0 |
| 15608836 |          |            |     | 0       | 0.004 | 0.0819   | 16.37     | 0.043828 | 3        | 2197.1837 | 1.829011 | 21.53947         | 1 |

| Protein  | Group | Modificati | ΔCn | q-Value | PEP | IonScore | Exp Value | Charge   | MH+ [Da] | ΔM [ppm]  | RT [min] | # Missed Cleavages |   |
|----------|-------|------------|-----|---------|-----|----------|-----------|----------|----------|-----------|----------|--------------------|---|
| 15610082 |       |            |     | 0       | 0   | 1.94E-08 | 126.07    | 3.46E-13 | 2        | 2026.9712 | -0.23301 | 38.13983           | 0 |
| 15610082 |       |            |     | 0       | 0   | 6.51E-07 | 116.88    | 5.95E-12 | 2        | 1604.8494 | 0.219044 | 29.56465           | 0 |
| 15610082 |       |            |     | 0       | 0   | 0.000124 | 108.78    | 2.71E-11 | 2        | 1947.0401 | 0.346866 | 32.10741           | 1 |

|               |            |     |         |          |          |           |        |           |          |          |                    |
|---------------|------------|-----|---------|----------|----------|-----------|--------|-----------|----------|----------|--------------------|
| 15610082      |            | 0   | 0       | 6.38E-06 | 82.28    | 1.54E-08  | 2      | 1559.827  | -0.42274 | 34.22151 | 0                  |
| 15610082      |            | 0   | 0       | 0.09387  | 80.35    | 1.48E-08  | 3      | 2967.477  | 2.497598 | 41.61825 | 1                  |
| 15610082      |            | 0   | 0       | 5.14E-08 | 66.82    | 2.39E-07  | 3      | 3296.763  | 1.359922 | 47.6757  | 0                  |
| 15610082      |            | 0   | 0       | 0.2062   | 65.57    | 5.13E-07  | 3      | 2101.1037 | -0.63701 | 24.34963 | 0                  |
| 15610082      |            | 0   | 0       | 0.01229  | 60.72    | 8.45E-07  | 2      | 1038.6052 | -0.33811 | 21.89315 | 0                  |
| 15610082      | C3(Carban  | 0   | 0       | 0.002099 | 58.33    | 1.47E-06  | 2      | 1641.7316 | -0.62758 | 26.1532  | 0                  |
| 15610082      |            | 0   | 0       | 0.00206  | 53.66    | 9.26E-06  | 3      | 2558.2752 | 0.71938  | 34.25133 | 1                  |
| 15610082      |            | 0   | 0       | 0.000198 | 50.92    | 1.21E-05  | 3      | 1781.9926 | 3.225377 | 27.92476 | 1                  |
| 15610082      | N-Term(A   | 0   | 0       | 0.4224   | 17.22    | 0.021812  | 3      | 3009.457  | -7.67977 | 42.45839 | 1                  |
| Protein Group | Modificati | ΔCn | q-Value | PEP      | IonScore | Exp Value | Charge | MH+ [Da]  | ΔM [ppm] | RT [min] | # Missed Cleavages |
| 57116716      | M9(Oxidat  |     | 0       | 0.006548 | 123.01   | 4.99E-13  | 3      | 3079.2132 | 0.023919 | 30.08111 | 0                  |
| 57116716      | M13(Oxid:  |     | 0       | 0.008038 | 101.91   | 6.43E-11  | 3      | 3564.4669 | -1.70691 | 28.7685  | 1                  |
| 57116716      |            |     | 0       | 0.04166  | 100.68   | 8.53E-11  | 3      | 3063.2184 | 0.057665 | 32.49559 | 0                  |
| 57116716      | M1(Oxidat  |     | 0       | 0.000921 | 77.69    | 1.7E-08   | 3      | 2461.0398 | 0.088489 | 24.47484 | 0                  |
| 57116716      | M14(Oxid:  |     | 0       | 0.02982  | 71.06    | 7.82E-08  | 3      | 3720.5786 | 1.206828 | 28.54067 | 2                  |
| 57116716      |            |     | 0       | 0.2538   | 63.78    | 7.75E-07  | 2      | 1151.6053 | -0.2684  | 22.88452 | 0                  |
| 57116716      |            |     | 0       | 0.08427  | 54.39    | 6.55E-06  | 2      | 1380.7591 | -0.29006 | 22.87961 | 0                  |
| 57116716      |            |     | 0       | 0.1587   | 48.56    | 2.51E-05  | 2      | 1644.8359 | 1.064987 | 31.43107 | 0                  |
| 57116716      | M1(Oxidat  |     | 0       | 0.1137   | 47.62    | 1.73E-05  | 3      | 2445.0478 | 1.254513 | 26.51631 | 0                  |
| 57116716      |            |     | 0       | 0.2452   | 42.29    | 8.56E-05  | 2      | 1735.9795 | -1.10688 | 24.80881 | 1                  |

|                  |      |       |     |      |      |   |   |      |   |        |        |        |        |      |
|------------------|------|-------|-----|------|------|---|---|------|---|--------|--------|--------|--------|------|
| Rv1032c,193-1524 | 1332 | 52.1  | 193 | 1524 | 0.02 | - | - | 0.02 | - | 0.00%  | -      | -      | 0.00%  | -    |
| Rv1352,37-372    | 336  | 15.6  | 37  | 372  | 0.20 | - | - | 0.20 | - | 3.40%  | -      | -      | 3.40%  | -    |
| Rv1418,106-381   | 276  | 13.4  | 106 | 381  | 0.00 | - | - | 0.00 | - | 2.00%  | -      | -      | 2.00%  | -    |
| Rv2261c,1-309    | 309  | 14.6  | 1   | 309  | 0.00 | - | - | 0.00 | - | 4.10%  | -      | -      | 4.10%  | -    |
| Rv2318,64-1287   | 1224 | 48.2  | 64  | 1287 | 0.27 | - | - | 0.27 | - | 5.60%  | -      | -      | 5.60%  | -    |
| Rv2914c,253-1692 | 1440 | 56.1  | 253 | 1692 | 0.86 | - | - | 0.86 | - | 4.50%  | -      | -      | 4.50%  | -    |
| Rv3390,226-711   | 486  | 21.1  | 226 | 711  | 0.35 | - | - | 0.35 | - | 0.90%  | -      | -      | 0.90%  | -    |
| Rv3492c,67-327   | 261  | 12.9  | 67  | 327  | 0.13 | - | - | 0.13 | - | 0.60%  | -      | -      | 0.60%  | -    |
| Rv3604c,289-1152 | 864  | 35.0  | 289 | 1152 | 0.24 | - | - | 0.24 | - | 3.80%  | -      | -      | 3.80%  | -    |
| Rv3450c,223-1299 | 1077 | 42.8  | 223 | 1299 | 0.49 | - | - | 0.49 | - | 13.60% | -      | -      | 13.60% | -    |
| Rv0232,136-585   | 450  | 18.2  | 136 | 585  | 0.00 | - | - | 0.00 | - | 54.92% | -      | 55.00% | 52.69% | 0.00 |
| Rv1698,58-828    | 771  | 31.57 | 58  | 828  | 0.13 | - | - | 0.13 | - | 1.00%  | -      | -      | 1.00%  | -    |
| Rv2945c,73-699   | 624  | 26.18 | 4   | 627  | 0.58 | - | - | 0.58 | - | 3.57%  | 30.12% | 1.24%  | 11.64% | 0.16 |

## Supplemental file 1–Manually validated by MS/MS spectra

The files present all MS/MS spectra of peptides matching to seven proteins that had a single peptide hit in our study. Each entry is represented by peptide sequence, ions score, and MS/MS spectra of matching peptides.

Rv0402c, 118-573

Peptide sequence: RPSPLPTIVPGLAPmPPGSVVPSSR

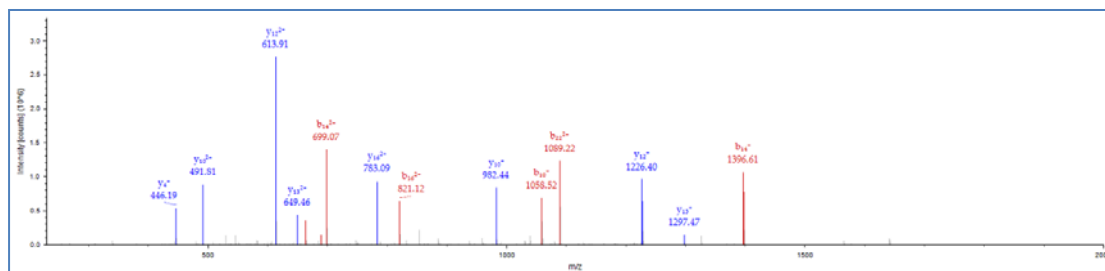

Ion Score: 66.07 Exp Value: 2.6E-07

| #1 | b <sup>+</sup> | b <sup>2+</sup> | b <sup>3+</sup> | Seq.        | y <sup>+</sup> | y <sup>2+</sup> | y <sup>3+</sup> | #2 |
|----|----------------|-----------------|-----------------|-------------|----------------|-----------------|-----------------|----|
| 1  | 157.10840      | 79.05784        | 53.04098        | R           |                |                 |                 | 26 |
| 2  | 254.16117      | 127.58422       | 85.39191        | P           | 2466.34264     | 1233.67496      | 822.78573       | 25 |
| 3  | 341.19320      | 171.10024       | 114.40258       | S           | 2369.28987     | 1185.14857      | 790.43481       | 24 |
| 4  | 438.24597      | 219.62662       | 146.75351       | P           | 2282.25784     | 1141.63256      | 761.42413       | 23 |
| 5  | 551.33004      | 276.16866       | 184.44820       | L           | 2185.20507     | 1093.10617      | 729.07321       | 22 |
| 6  | 648.38281      | 324.69504       | 216.79912       | P           | 2072.12100     | 1036.56414      | 691.37852       | 21 |
| 7  | 749.43049      | 375.21888       | 250.48168       | T           | 1975.06823     | 988.03775       | 659.02759       | 20 |
| 8  | 846.48326      | 423.74527       | 282.83260       | P           | 1874.02055     | 937.51391       | 625.34503       | 19 |
| 9  | 959.56733      | 480.28730       | 320.52729       | I           | 1776.96778     | 888.98753       | 592.99411       | 18 |
| 10 | 1058.63575     | 529.82151       | 353.55010       | V           | 1663.88371     | 832.44549       | 555.29942       | 17 |
| 11 | 1155.68852     | 578.34790       | 385.90102       | P           | 1564.81529     | 782.91128       | 522.27661       | 16 |
| 12 | 1212.70999     | 606.85863       | 404.90818       | G           | 1467.76252     | 734.38490       | 489.92569       | 15 |
| 13 | 1325.79406     | 663.40067       | 442.60287       | L           | 1410.74105     | 705.87416       | 470.91853       | 14 |
| 14 | 1396.83118     | 698.91923       | 466.28191       | A           | 1297.65698     | 649.33213       | 433.22384       | 13 |
| 15 | 1493.88395     | 747.44561       | 498.63283       | P           | 1226.61986     | 613.81357       | 409.54480       | 12 |
| 16 | 1640.91936     | 820.96332       | 547.64464       | M-Oxidation | 1129.56709     | 565.28718       | 377.19388       | 11 |
| 17 | 1737.97213     | 869.48970       | 579.99556       | P           | 982.53167      | 491.76947       | 328.18207       | 10 |
| 18 | 1835.02490     | 918.01609       | 612.34648       | P           | 885.47890      | 443.24309       | 295.83115       | 9  |
| 19 | 1892.04637     | 946.52682       | 631.35364       | G           | 788.42613      | 394.71670       | 263.48023       | 8  |
| 20 | 1979.07840     | 990.04284       | 660.36432       | S           | 731.40466      | 366.20597       | 244.47307       | 7  |
| 21 | 2078.14682     | 1039.57705      | 693.38712       | V           | 644.37263      | 322.68995       | 215.46239       | 6  |
| 22 | 2177.21524     | 1089.11126      | 726.40993       | V           | 545.30421      | 273.15574       | 182.43959       | 5  |
| 23 | 2274.26801     | 1137.63764      | 758.76085       | P           | 446.23579      | 223.62153       | 149.41678       | 4  |
| 24 | 2361.30004     | 1181.15366      | 787.77153       | S           | 349.18302      | 175.09515       | 117.06586       | 3  |
| 25 | 2448.33207     | 1224.66967      | 816.78221       | S           | 262.15099      | 131.57913       | 88.05518        | 2  |
| 26 |                |                 |                 | R           | 175.11896      | 88.06312        | 59.04450        | 1  |

Rv0996, 79-705

Peptide sequence: WGYLPPEGQGDDPDWKPEEDWR

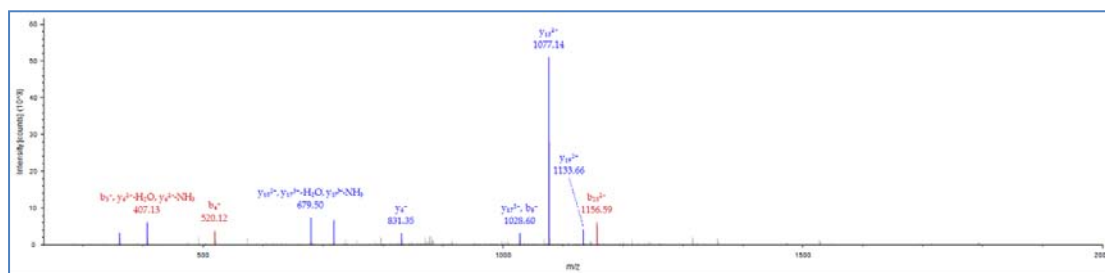

Ion Score: 33.04 Exp Value: 4.95E-04

| #1 | b <sup>+</sup> | b <sup>2+</sup> | b <sup>3+</sup> | Seq. | y <sup>+</sup> | y <sup>2+</sup> | y <sup>3+</sup> | #2 |
|----|----------------|-----------------|-----------------|------|----------------|-----------------|-----------------|----|
| 1  | 187.08660      | 94.04694        | 63.03372        | W    |                |                 |                 | 22 |
| 2  | 244.10807      | 122.55767       | 82.04087        | G    | 2486.08963     | 1243.54845      | 829.36806       | 21 |
| 3  | 407.17139      | 204.08933       | 136.39531       | Y    | 2429.06816     | 1215.03772      | 810.36090       | 20 |
| 4  | 520.25546      | 260.63137       | 174.09000       | L    | 2266.00484     | 1133.50606      | 756.00646       | 19 |
| 5  | 617.30823      | 309.15775       | 206.44093       | P    | 2152.92077     | 1076.96402      | 718.31177       | 18 |
| 6  | 714.36100      | 357.68414       | 238.79185       | P    | 2055.86800     | 1028.43764      | 685.96085       | 17 |
| 7  | 843.40360      | 422.20544       | 281.80605       | E    | 1958.81523     | 979.91125       | 653.60993       | 16 |
| 8  | 900.42507      | 450.71617       | 300.81321       | G    | 1829.77263     | 915.38995       | 610.59573       | 15 |
| 9  | 1028.48365     | 514.74546       | 343.49940       | Q    | 1772.75116     | 886.87922       | 591.58857       | 14 |
| 10 | 1085.50512     | 543.25620       | 362.50656       | G    | 1644.69258     | 822.84993       | 548.90238       | 13 |
| 11 | 1200.53207     | 600.76967       | 400.84887       | D    | 1587.67111     | 794.33919       | 529.89522       | 12 |
| 12 | 1315.55902     | 658.28315       | 439.19119       | D    | 1472.64416     | 736.82572       | 491.55290       | 11 |
| 13 | 1412.61179     | 706.80953       | 471.54211       | P    | 1357.61721     | 679.31224       | 453.21059       | 10 |
| 14 | 1527.63874     | 764.32301       | 509.88443       | D    | 1260.56444     | 630.78586       | 420.85966       | 9  |
| 15 | 1713.71806     | 857.36267       | 571.91087       | W    | 1145.53749     | 573.27238       | 382.51735       | 8  |
| 16 | 1841.81303     | 921.41015       | 614.60919       | K    | 959.45817      | 480.23272       | 320.49091       | 7  |
| 17 | 1938.86580     | 969.93654       | 646.96012       | P    | 831.36320      | 416.18524       | 277.79258       | 6  |
| 18 | 2067.90840     | 1034.45784      | 689.97432       | E    | 734.31043      | 367.65885       | 245.44166       | 5  |
| 19 | 2196.95100     | 1098.97914      | 732.98852       | E    | 605.26783      | 303.13755       | 202.42746       | 4  |
| 20 | 2311.97795     | 1156.49261      | 771.33083       | D    | 476.22523      | 238.61625       | 159.41326       | 3  |
| 21 | 2498.05727     | 1249.53227      | 833.35727       | W    | 361.19828      | 181.10278       | 121.07094       | 2  |
| 22 |                |                 |                 | R    | 175.11896      | 88.06312        | 59.04450        | 1  |

Supplemental Figures 1. The Western Blot result of 219 protein candidates in pulmonary TB patients.

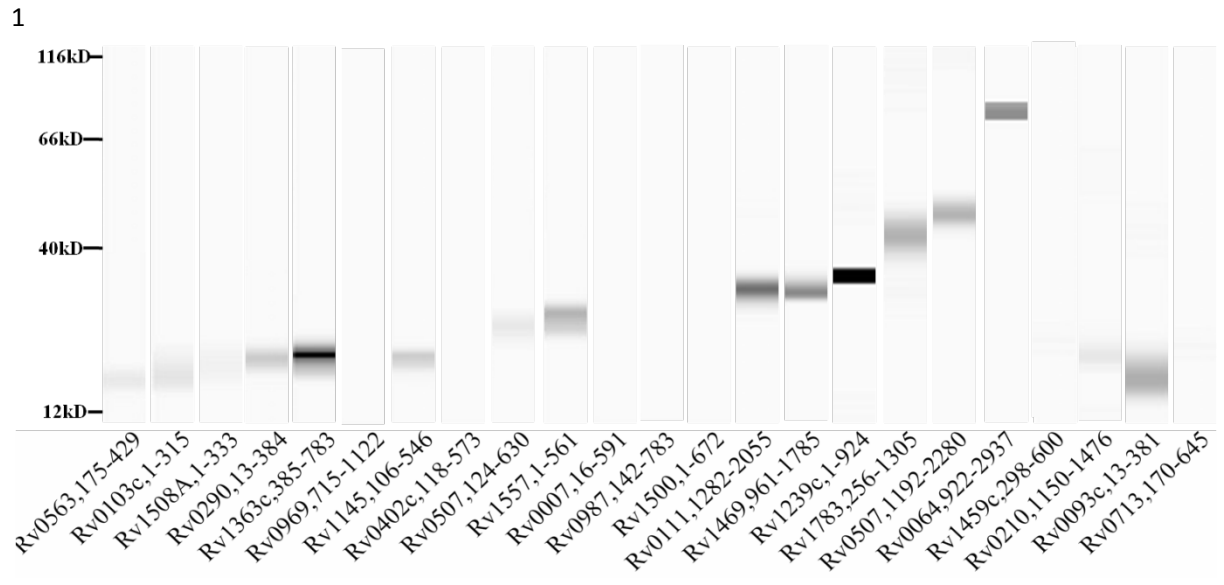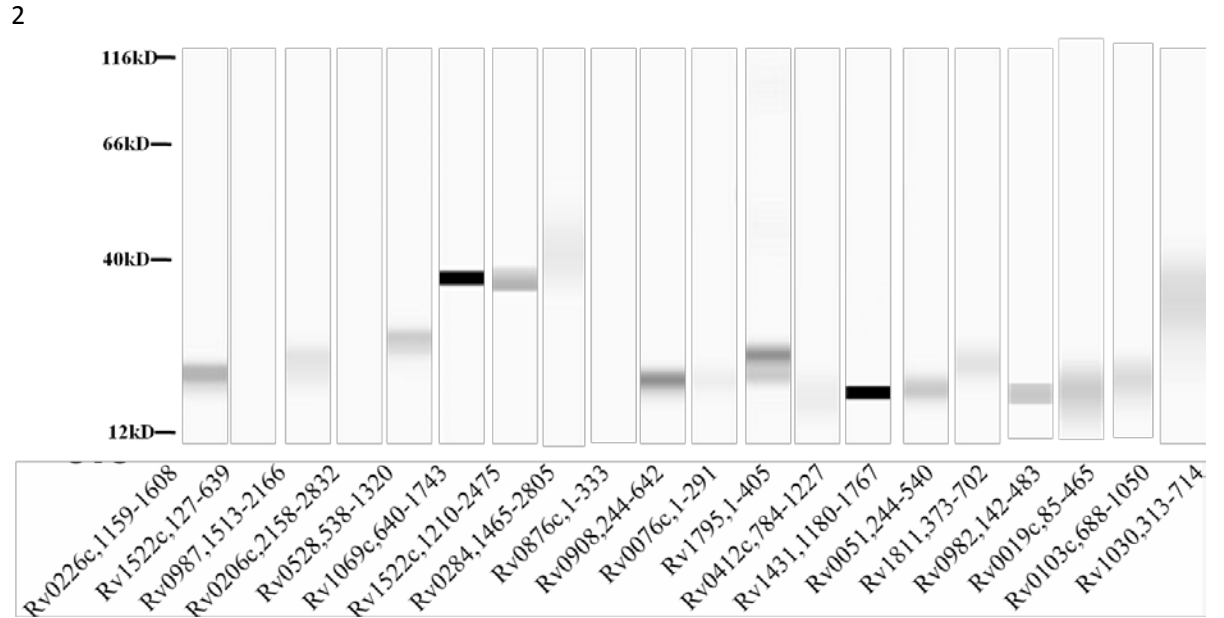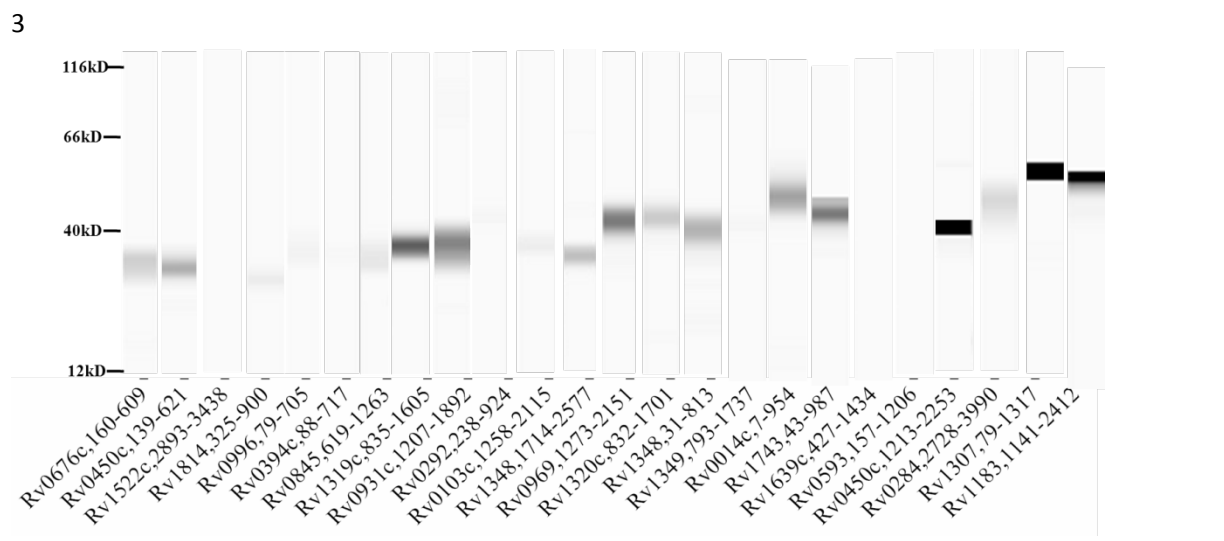

4

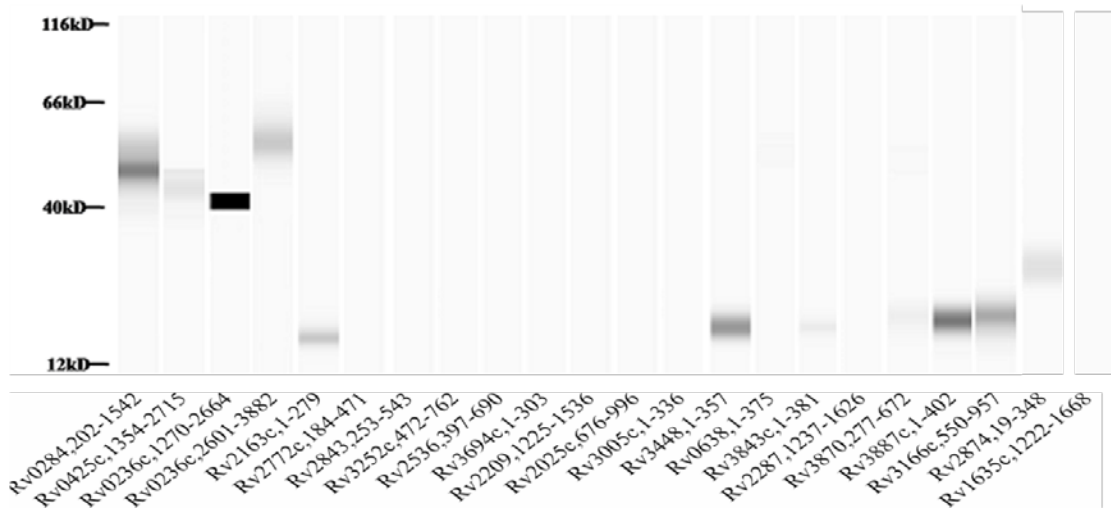

5

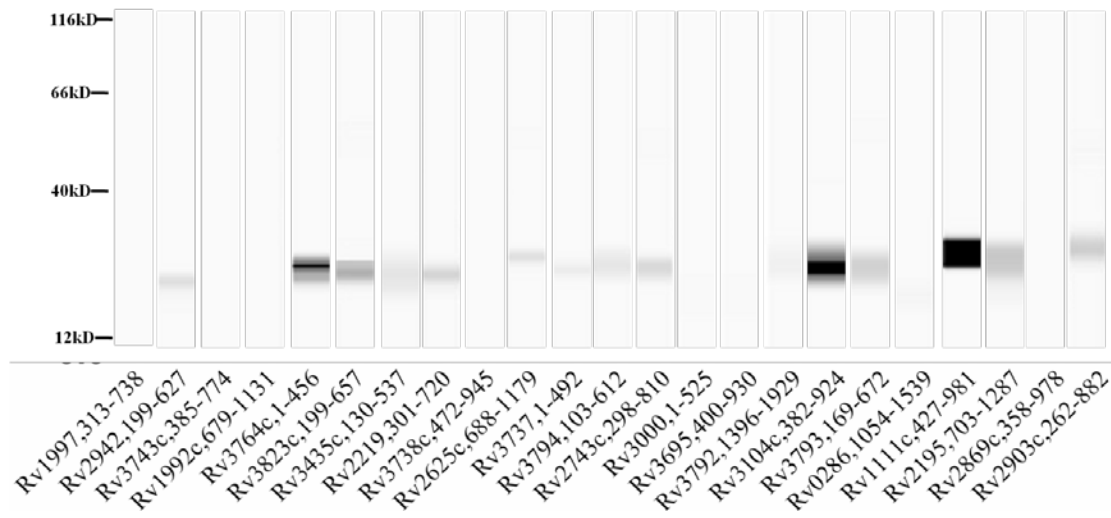

6

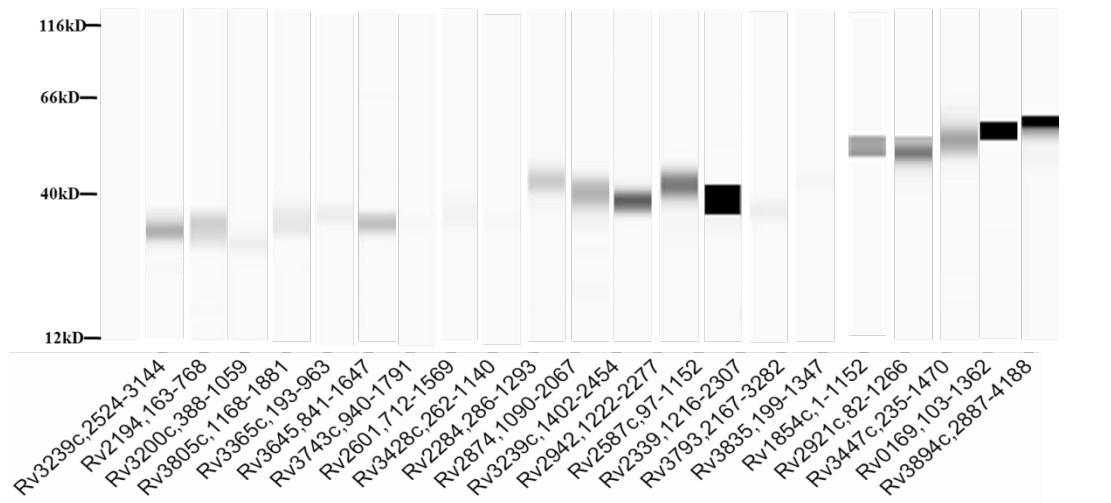

7

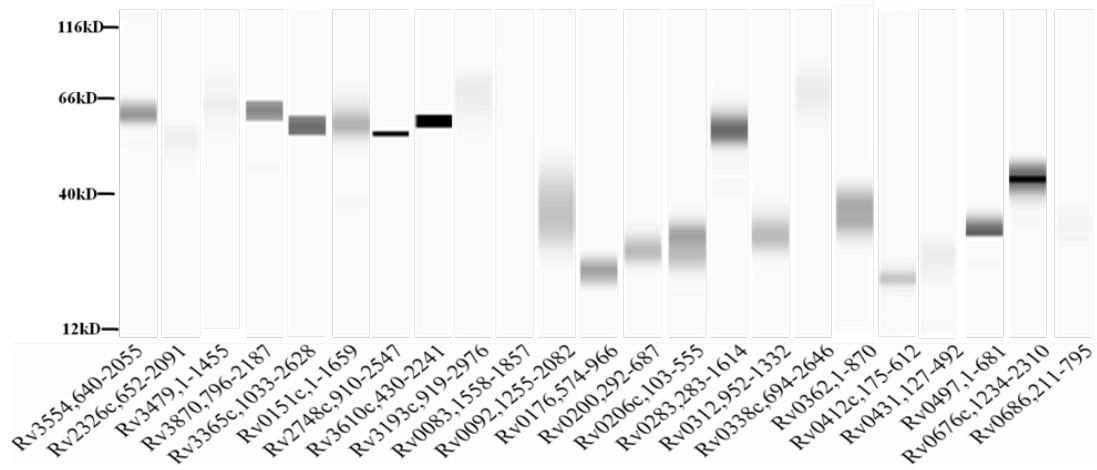

8

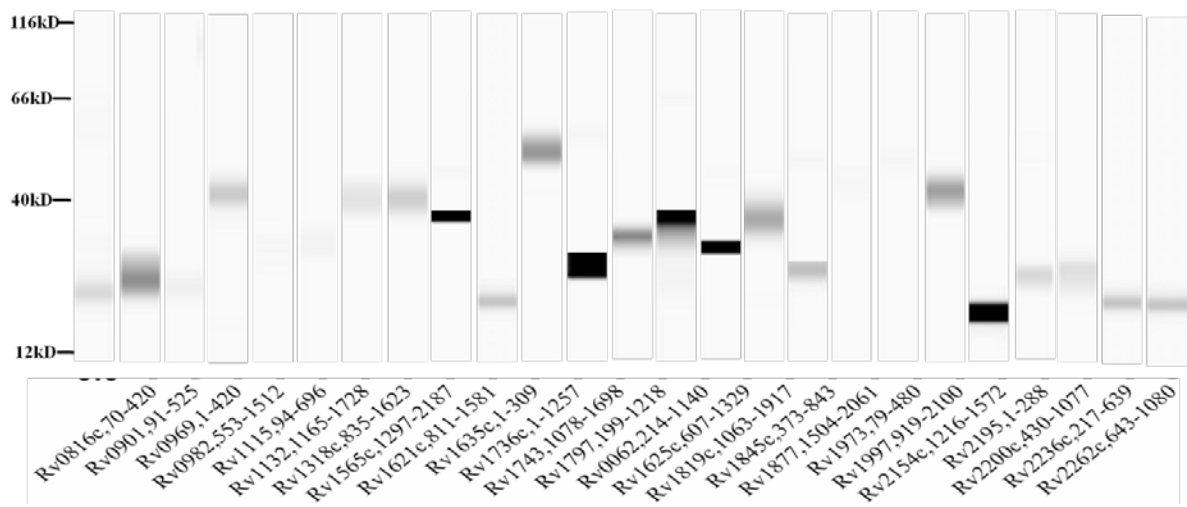

9

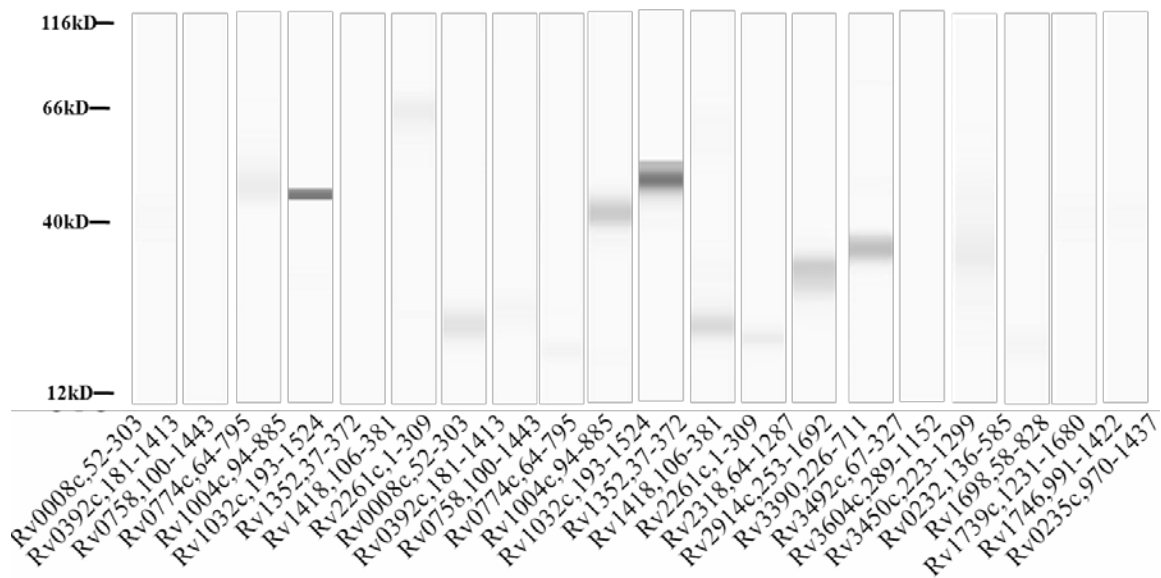



10

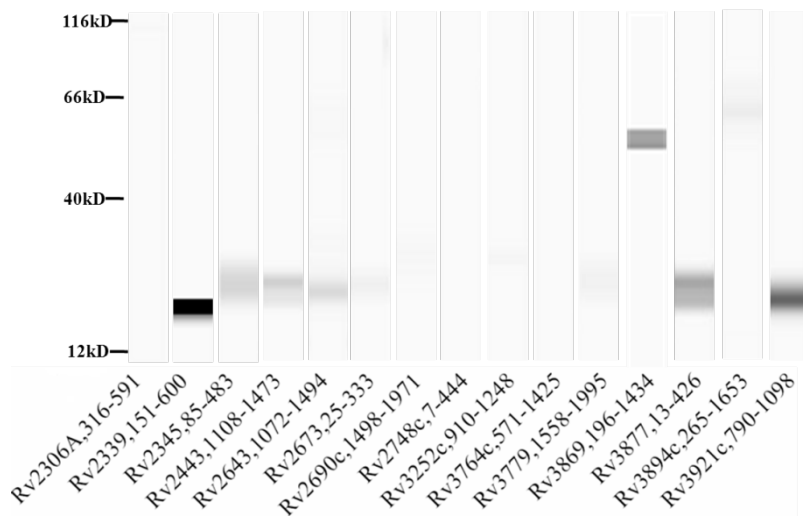

### Second round

2. The Western Blot result of 52 protein candidates in pulmonary TB patients.

1

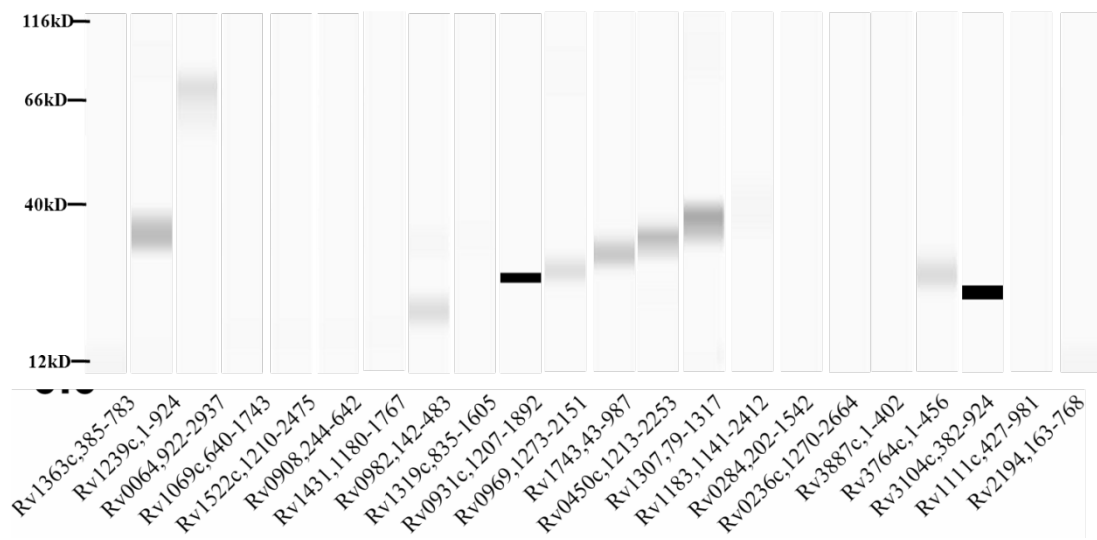

2

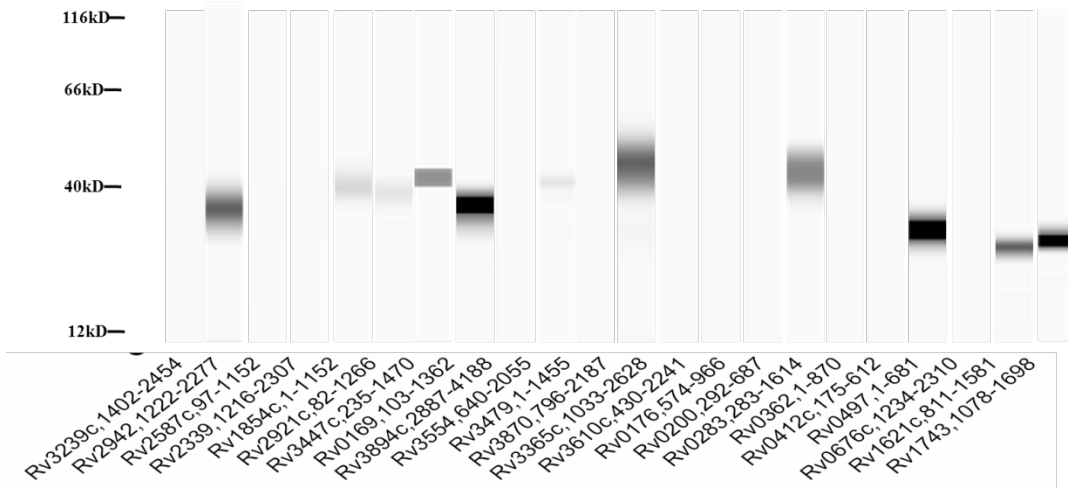

3

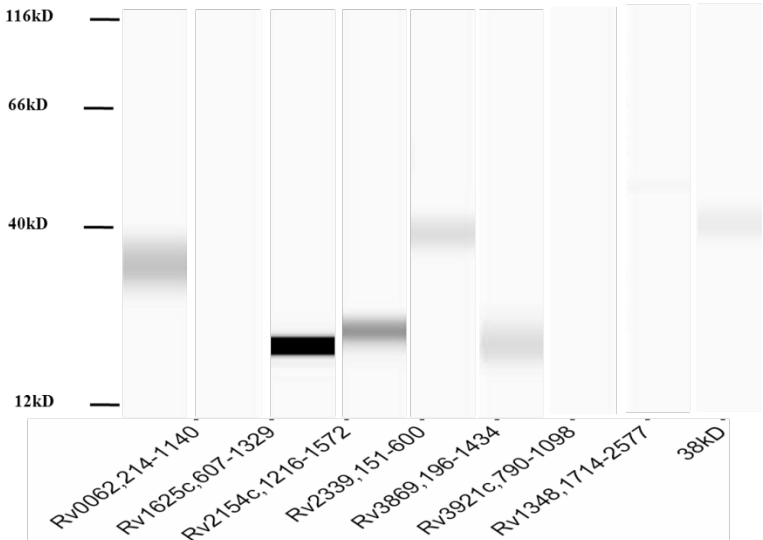

**Third round**

3. The Western Blot result of 12 protein candidates in pulmonary TB patients.

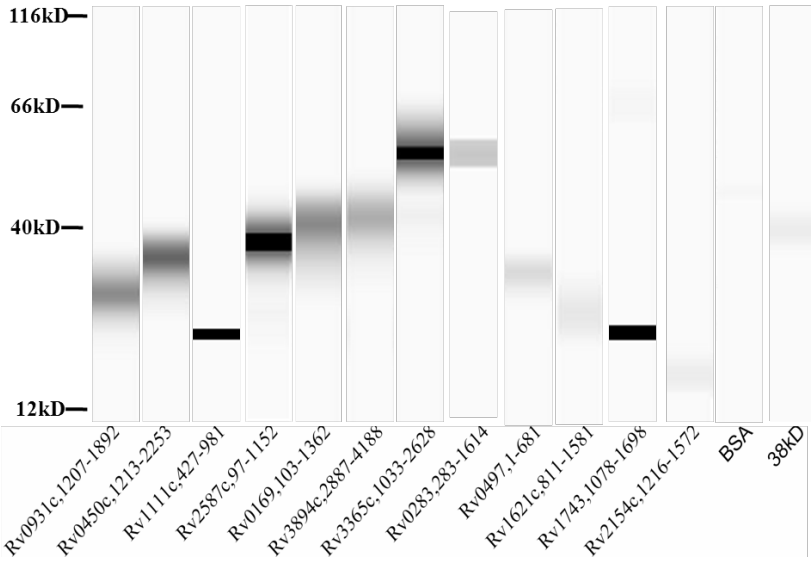

| ELISPOT Confirmation file |               |                                 |                                                                                     |                                                                             |
|---------------------------|---------------|---------------------------------|-------------------------------------------------------------------------------------|-----------------------------------------------------------------------------|
| ORF                       | Positive rate | average Intensity of reactivity | spot of cell format                                                                 | Product                                                                     |
| Rv0232                    | 53.33%        | 42.15%                          |    | TETR/ACRR FAMILY TRANSCRIPTIONAL REGULATOR                                  |
| Rv1115                    | 46.67%        | 43.62%                          |    | POSSIBLE CONSERVED LIPOPROTEIN LPPH                                         |
| Rv0284                    | 40.00%        | 26.55%                          |    | POSSIBLE CONSERVED MEMBRANE PROTEIN                                         |
| Rv1145                    | 46.67%        | 22.20%                          |    | PROBABLE CONSERVED TRANSMEMBRANE TRANSPORT PROTEIN MMPL13A                  |
| Rv0987                    | 20.0%         | 23.38%                          |   | PROBABLE ADHESION COMPONENT TRANSPORT TRANSMEMBRANE PROTEIN ABC TRANSPORTER |
| Rv1783                    | 26.67%        | 24.34%                          |  | PROBABLE CONSERVED MEMBRANE PROTEIN                                         |
| Rv3447c                   | 20.0%         | 23.84%                          |  | PROBABLE CONSERVED MEMBRANE PROTEIN                                         |
| Rv1500                    | 26.67%        | 14.52%                          |  | PROBABLE CATION TRANSPORTER P-TYPE ATPASE CTPJ                              |

| 8 Proteins SFC with ESAT-6 positive patient |      |     |     |     |     |     |     |     |     |      |      |      |      |      |      |
|---------------------------------------------|------|-----|-----|-----|-----|-----|-----|-----|-----|------|------|------|------|------|------|
| ORF                                         | P*-1 | P-2 | P-3 | P-4 | P-5 | P-6 | P-7 | P-8 | P-9 | P-10 | P-11 | P-12 | P-13 | P-14 | P-15 |
| Rv0232                                      | 20   | 11  | 9   | 35  | 10  | 8   | 83  | 7   | 57  | 67   | 44   | 28   | 0    | 11   | 48   |
| Rv0284                                      | 16   | 10  | 28  | 10  | 7   | 113 | 28  | 19  | 16  | 44   | 5    | 22   | 33   | 18   | 43   |
| Rv0987                                      | 7    | 9   | 19  | 2   | 4   | 80  | 18  | 4   | 14  | 42   | 5    | 11   | 34   | 15   | 27   |
| Rv1115                                      | 18   | 7   | 13  | 10  | 23  | 78  | 37  | 6   | 24  | 27   | 0    | 27   | 29   | 15   | 25   |
| Rv1145                                      | 8    | 9   | 26  | 7   | 10  | 74  | 22  | 6   | 7   | 33   | 6    | 23   | 37   | 19   | 31   |
| Rv1500                                      | 15   | 5   | 4   | 5   | 14  | 47  | 23  | 9   | 5   | 24   | 8    | 15   | 37   | 11   | 23   |
| Rv1783                                      | 7    | 9   | 25  | 2   | 15  | 66  | 16  | 12  | 10  | 48   | 10   | 16   | 21   | 17   | 27   |
| Rv3447c                                     | 7    | 7   | 18  | 2   | 8   | 65  | 19  | 16  | 18  | 31   | 15   | 5    | 26   | 16   | 45   |
| ESTA-6 KIT                                  | 138  | 115 | 109 | 121 | 272 | 197 | 62  | 42  | 185 | 122  | 182  | 192  | 288  | 244  | 117  |
| ESTA-6 EXP                                  | 67   | 66  | 136 | 109 | 176 | 153 | 97  | 22  | 145 | 44   | 185  | 219  | 234  | 212  | 226  |

\*:ESAT-6 positive patient

| 8 Proteins SFC with ESAT-6 negative patient |      |     |     |     |     |     |     |     |
|---------------------------------------------|------|-----|-----|-----|-----|-----|-----|-----|
| ORF                                         | N*-1 | N-2 | N-3 | N-4 | N-5 | N-6 | N-7 | N-8 |
| Rv0232                                      | 29   | 4   | 7   | 20  | 13  | 6   | 39  | 3   |
| Rv0284                                      | 0    | 0   | 9   | 63  | 15  | 25  | 7   | 0   |
| Rv0987                                      | 0    | 0   | 8   | 56  | 7   | 20  | 7   | 0   |
| Rv1115                                      | 11   | 0   | 4   | 52  | 24  | 18  | 3   | 0   |
| Rv1145                                      | 7    | 0   | 4   | 56  | 14  | 24  | 11  | 1   |
| Rv1500                                      | 0    | 0   | 3   | 40  | 6   | 23  | 4   | 0   |
| Rv1783                                      | 2    | 0   | 4   | 53  | 16  | 25  | 7   | 0   |
| Rv3447c                                     | 0    | 0   | 1   | 46  | 14  | 28  | 15  | 1   |
| ESTA-6 KIT                                  | 10   | 17  | 30  | 5   | 27  | 15  | 6   | 3   |
| ESTA-6 EXP                                  | 15   | 19  | 1   | 71  | 114 | 23  | 2   | 0   |

\*:ESAT-6negative patients

| 8 Proteins SFC with ESAT-6 negative patient |             |             |             |             |             |
|---------------------------------------------|-------------|-------------|-------------|-------------|-------------|
| ORF                                         | candidate 1 | candidate 2 | candidate 3 | candidate 4 | candidate 5 |
| Rv0232                                      | 2           | 6           | 5           | 9           | 6           |
| Rv0284                                      | 4           | 0           | 1           | 5           | 4           |
| Rv0987                                      | 6           | 1           | 0           | 1           | 1           |
| Rv1115                                      | 2           | 2           | 0           | 0           | 1           |
| Rv1145                                      | 5           | 0           | 0           | 2           | 1           |
| Rv1500                                      | 3           | 0           | 0           | 1           | 4           |
| Rv1783                                      | 6           | 0           | 0           | 1           | 3           |
| Rv3447c                                     | 5           | 0           | 0           | 0           | 3           |
| ESTA-6 KIT                                  | 23          | 7           | 6           | 7           | 0           |
| ESTA-6 EXP                                  | 11          | 6           | 24          | 0           | 2           |

| The data of IFN- $\gamma$ were stimulation by proteins. |               |               |               |
|---------------------------------------------------------|---------------|---------------|---------------|
|                                                         | CD4+ , IFN-r+ | CD4+ , IFN-r+ | CD4+ , IFN-r+ |
| PBS-N- $\gamma$ .fcs                                    | 0             | 0             | 0             |
| PBS-P- $\gamma$ .fcs                                    | 0.092         | 0.056         | 0.044         |
| PBS-Ag- $\gamma$ .fcs                                   | 0.051         | 0.012         | 0.766         |
| OVA-N- $\gamma$ .fcs                                    | 0             | 0             | 0             |
| OVA-P- $\gamma$ .fcs                                    | 0.572         | 0.035         | 0.713         |
| OVA-Ag- $\gamma$ .fcs                                   | 0.617         | 0.077         | 0.303         |
| Rv3875-N- $\gamma$ .fcs                                 | 0             | 0             | 0             |
| Rv3875-P- $\gamma$ .fcs                                 | 2.05          | 1.664         | 1.478         |
| Rv3875-Ag- $\gamma$ .fcs                                | 0.324         | 0.188         | 0.118         |
| Rv0232-N- $\gamma$ .fcs                                 | 0             | 0             | 0             |
| Rv0232-P- $\gamma$ .fcs                                 | 1.809         | 0.242         | 1.741         |
| Rv0232-Ag- $\gamma$ .fcs                                | 0.129         | 0.482         | 0.04          |
| Rv1811N- $\gamma$ .fcs                                  | 0             | 0             | 0             |
| Rv1811P- $\gamma$ .fcs                                  | 1.685         | 0.018         | 1.7           |
| Rv1811Ag- $\gamma$ .fcs                                 | 0.108         | 0.159         | 0.19          |
| Rv1115N- $\gamma$ .fcs                                  | 0             | 0             | 0             |
| Rv1115P- $\gamma$ .fcs                                  | 1.35          | 0.398         | 0.15          |
| Rv1115Ag- $\gamma$ .fcs                                 | 0.28          | 0.181         | 1.64          |

N: PBS stimulate

P: PHA stimulate

Ag: Protein stimulate

| The data of IFN- $\gamma$ were stimulation by proteins. |               |               |               |
|---------------------------------------------------------|---------------|---------------|---------------|
|                                                         | CD8+ , IFN-r+ | CD8+ , IFN-r+ | CD8+ , IFN-r+ |
| PBS-N- $\gamma$ .fcs                                    | 0             | 0             | 0             |
| PBS-P- $\gamma$ .fcs                                    | 0.195         | 1.343         | 0.73          |
| PBS-Ag- $\gamma$ .fcs                                   | 0.071         | 0.084         | 0.066         |
| OVA-N- $\gamma$ .fcs                                    | 0             | 0             | 0             |
| OVA-P- $\gamma$ .fcs                                    | 0.251         | 1.217         | 0.045         |
| OVA-Ag- $\gamma$ .fcs                                   | 0.126         | 0.535         | 0.045         |
| Rv3875-N- $\gamma$ .fcs                                 | 0             | 0             | 0             |
| Rv3875-P- $\gamma$ .fcs                                 | 1.302         | 2.347         | 2.328         |
| Rv3875-Ag- $\gamma$ .fcs                                | 0.237         | 1.217         | 0.308         |
| Rv0232-N- $\gamma$ .fcs                                 | 0             | 0             | 0             |
| Rv0232-P- $\gamma$ .fcs                                 | 0.776         | 3.629         | 0.5           |
| Rv0232-Ag- $\gamma$ .fcs                                | 0.456         | 0.177         | 0.05          |
| Rv1811N- $\gamma$ .fcs                                  | 0             | 0             | 0             |
| Rv1811P- $\gamma$ .fcs                                  | 0.161         | 3.12          | 0.897         |
| Rv1811Ag- $\gamma$ .fcs                                 | 0.367         | 0.054         | 0.031         |
| Rv1115N- $\gamma$ .fcs                                  | 0             | 0             | 0             |
| Rv1115P- $\gamma$ .fcs                                  | 0.318         | 1.404         | 0.47          |
| Rv1115Ag- $\gamma$ .fcs                                 | 0.337         | 0.006         | 0.029         |

N: PBS stimulate

P: PHA stimulate

Ag: Protein stimulate



| The data of IL-2 were stimulation by proteins. |              |              |              |
|------------------------------------------------|--------------|--------------|--------------|
|                                                | CD4+ , IL-2+ | CD4+ , IL-2+ | CD4+ , IL-2+ |
| PBS-N-2.fcs                                    | 0            | 0            | 0            |
| PBS-P-2.fcs                                    | 0.05         | 0.059        | 0.013        |
| PBS-Ag-2.fcs                                   | 0.001        | 0.033        | 0.028        |
| OVA-N-2.fcs                                    | 0            | 0            | 0            |
| OVA-P-2.fcs                                    | 0.045        | 0.081        | 0.028        |
| OVA-Ag-2.fcs                                   | 0.087        | 0.076        | 0.026        |
| Rv3875-N-2.fcs                                 | 0            | 0            | 0            |
| Rv3875-P-2.fcs                                 | 0.487        | 1.279        | 0.256        |
| Rv3875-Ag-2.fcs                                | 0.14         | 0.121        | 0.122        |
| Rv0232-N-2.fcs                                 | 0            | 0            | 0            |
| Rv0232-P-2.fcs                                 | 0.152        | 0.093        | 0.115        |
| Rv0232-Ag-2.fcs                                | 0.12         | 0.075        | 0.122        |
| Rv1811N-2.fcs                                  | 0            | 0            | 0            |
| Rv1811P-2.fcs                                  | 0.286        | 0.169        | 0.036        |
| Rv1811Ag-2.fcs                                 | 0.069        | 0.175        | 0.074        |
| Rv1115-N-2.fcs                                 | 0            | 0            | 0            |
| Rv1115-P-2.fcs                                 | 0.192        | 0.095        | 0.233        |
| Rv1115-Ag-2.fcs                                | 0.079        | 0.077        | 0.085        |

N: PBS stimulate

P: PHA stimulate

Ag: Protein stimulate

| The data of IL-2 were stimulation by proteins. |              |              |              |
|------------------------------------------------|--------------|--------------|--------------|
|                                                | CD8+ , IL-2+ | CD8+ , IL-2+ | CD8+ , IL-2+ |
| PBS-N-2.fcs                                    | 0            | 0            | 0            |
| PBS-P-2.fcs                                    | 0.06         | 0.076        | 0.013        |
| PBS-Ag-2.fcs                                   | 0.037        | 0.031        | 0.049        |
| OVA-N-2.fcs                                    | 0            | 0            | 0            |
| OVA-P-2.fcs                                    | 0.059        | 0.094        | 0.058        |
| OVA-Ag-2.fcs                                   | 0.023        | 0.071        | 0.021        |
| Rv3875-N-2.fcs                                 | 0            | 0            | 0            |
| Rv3875-P-2.fcs                                 | 0.55         | 0.21         | 0.165        |
| Rv3875-Ag-2.fcs                                | 0.19         | 0.135        | 0.179        |
| Rv0232-N-2.fcs                                 | 0            | 0            | 0            |
| Rv0232-P-2.fcs                                 | 0.218        | 0.13         | 0.11         |
| Rv0232-Ag-2.fcs                                | 0.06         | 0.036        | 0.177        |
| Rv1811N-2.fcs                                  | 0            | 0            | 0            |
| Rv1811P-2.fcs                                  | 0.253        | 0.054        | 0.345        |
| Rv1811Ag-2.fcs                                 | 0.083        | 0.18         | 0.104        |
| Rv1115-N-2.fcs                                 | 0            | 0            | 0            |
| Rv1115-P-2.fcs                                 | 0.087        | 0.107        | 0.244        |
| Rv1115-Ag-2.fcs                                | 0.069        | 0.175        | 0.185        |

N: PBS stimulate

P: PHA stimulate

Ag: Protein stimulate

The fig results of IFN- $\gamma$  and IL-2 were stimulation by proteins.

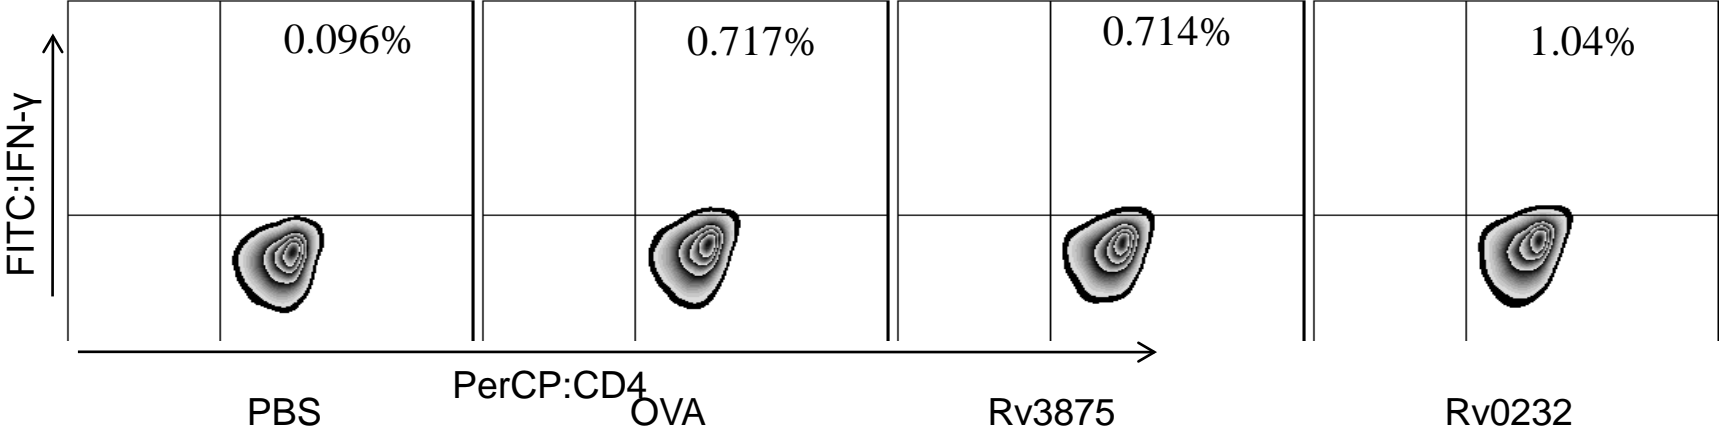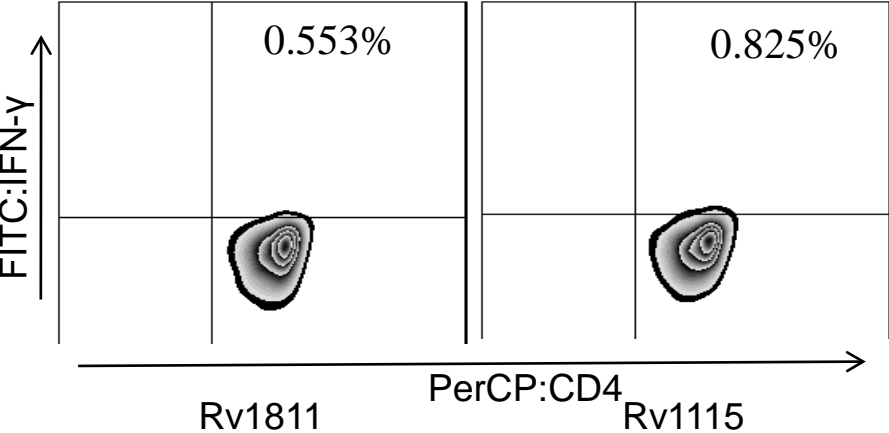

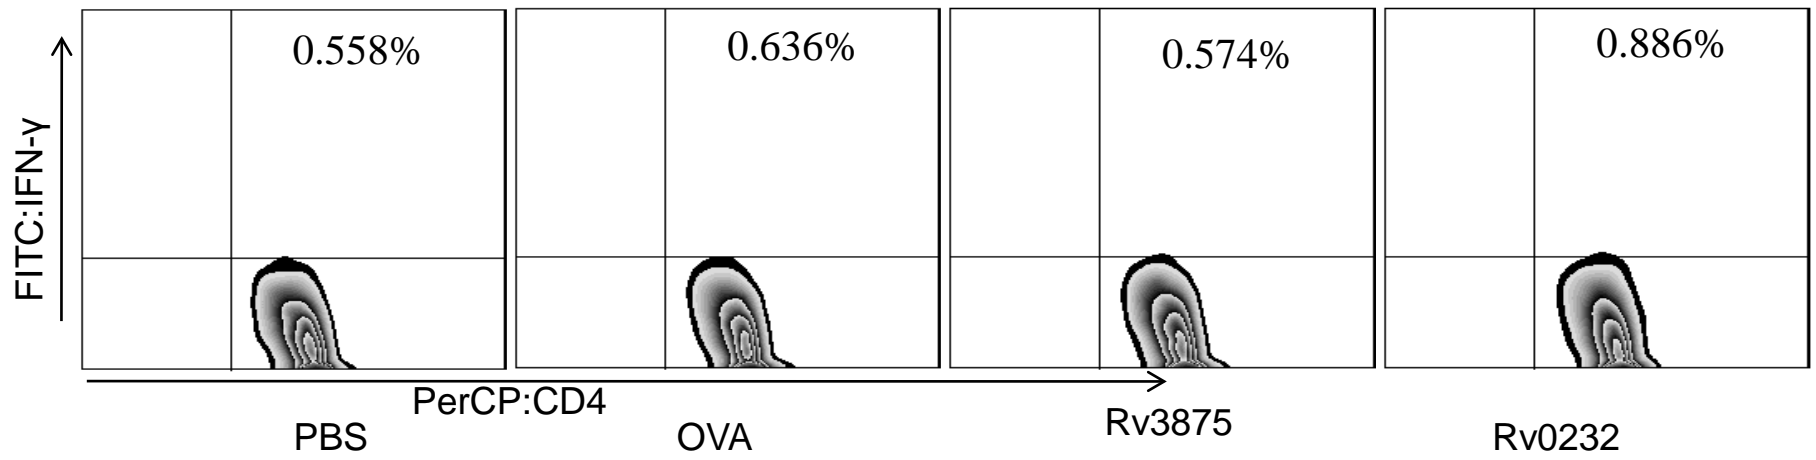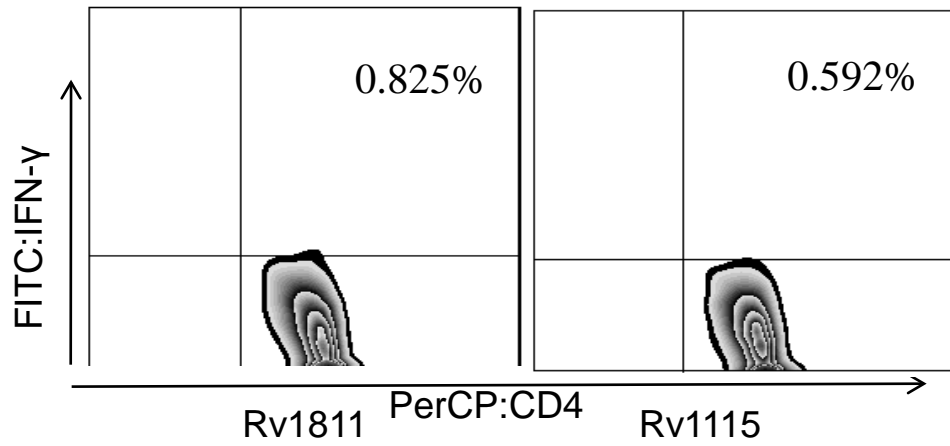

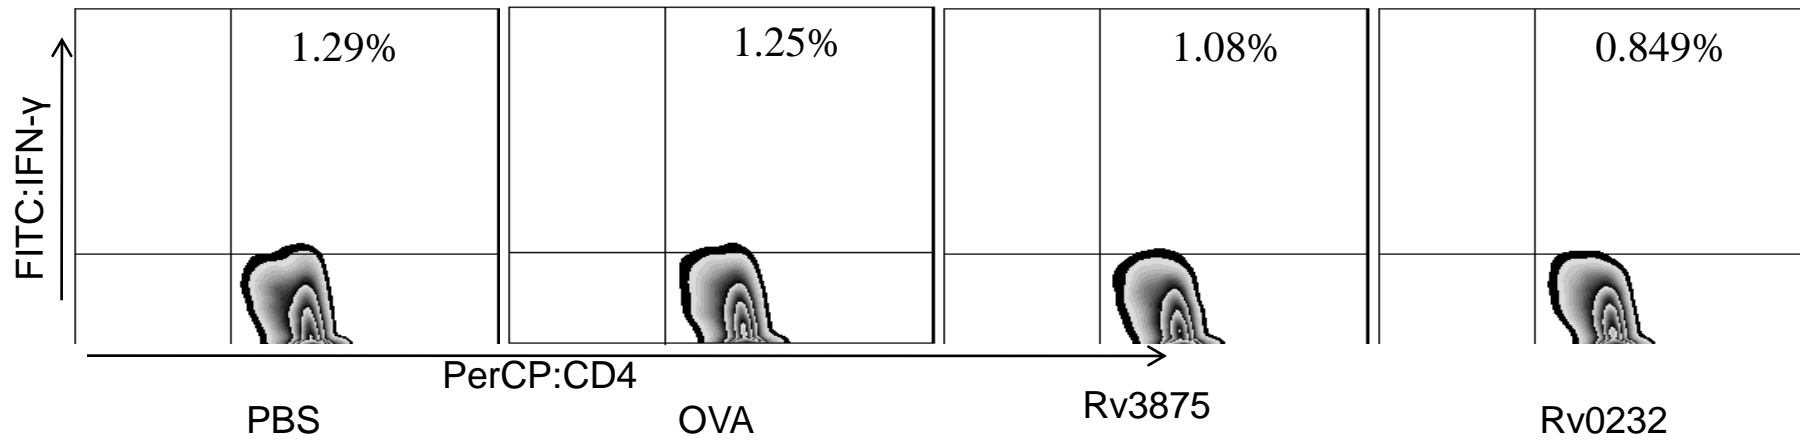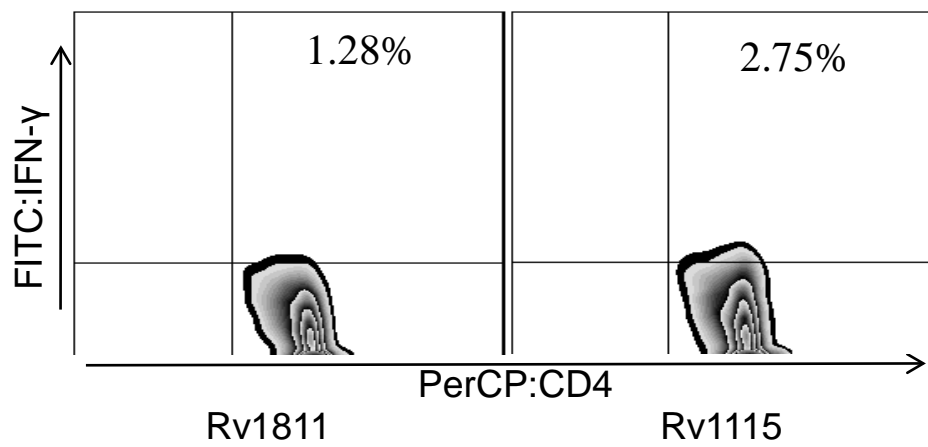

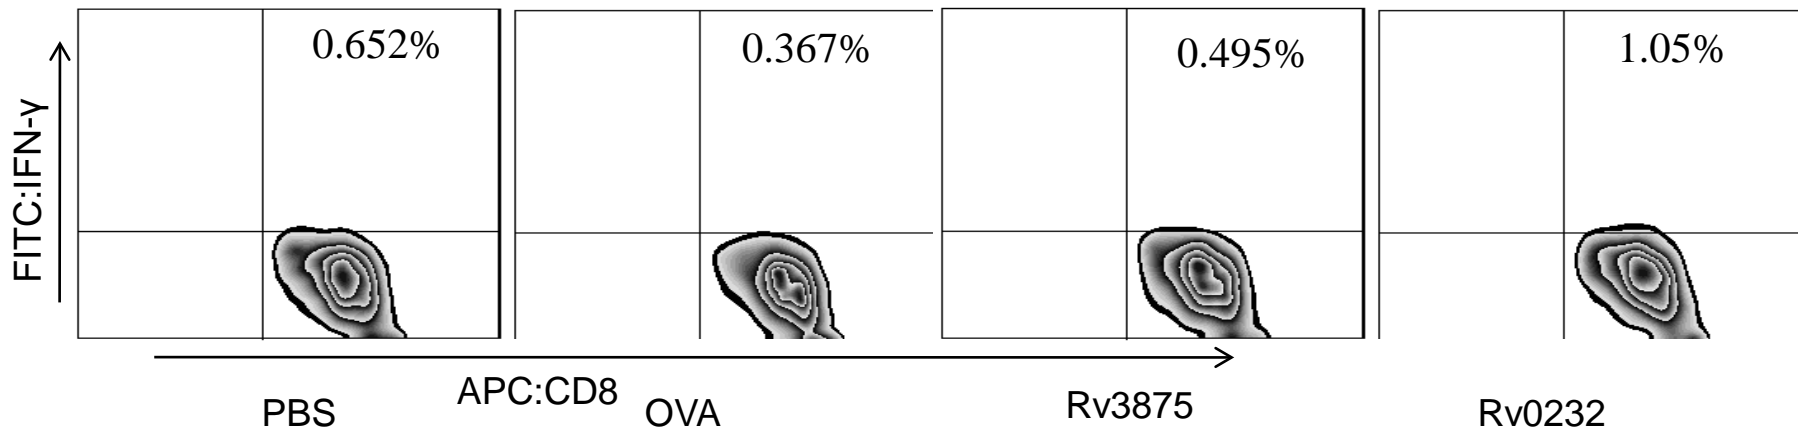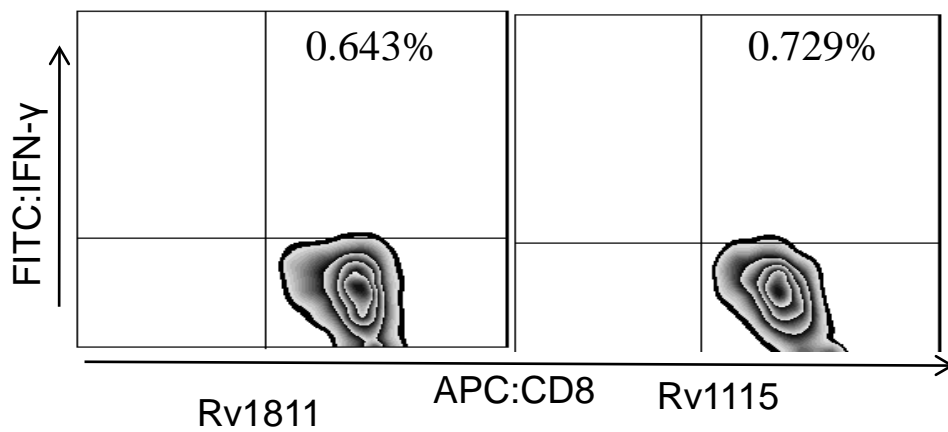

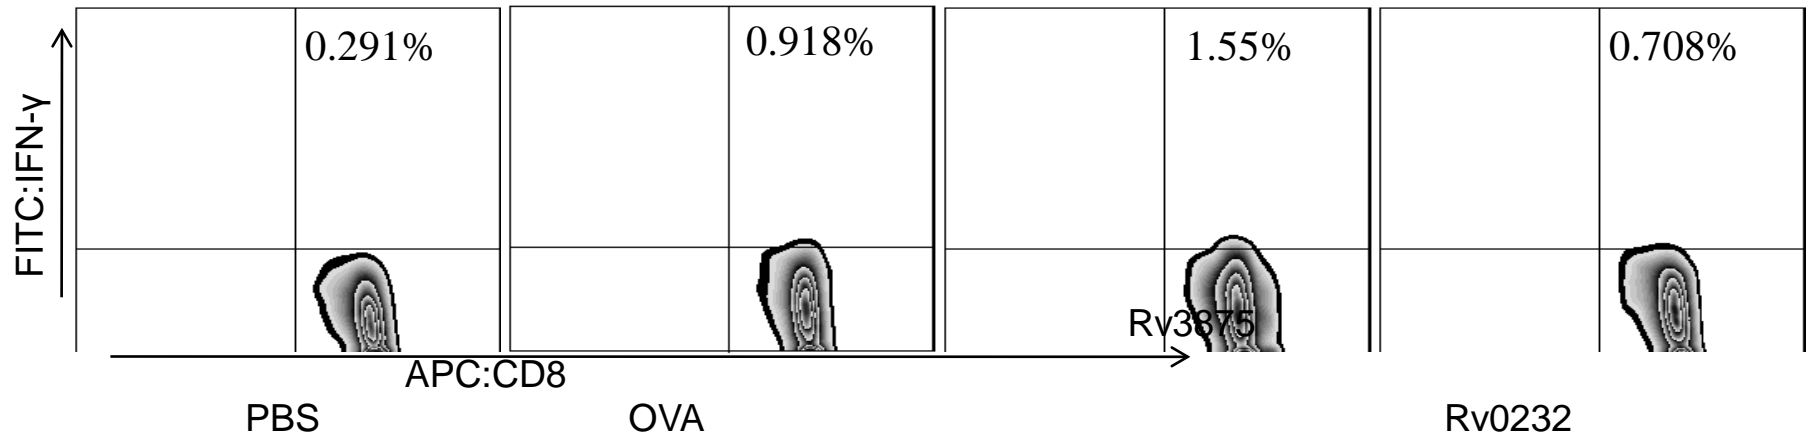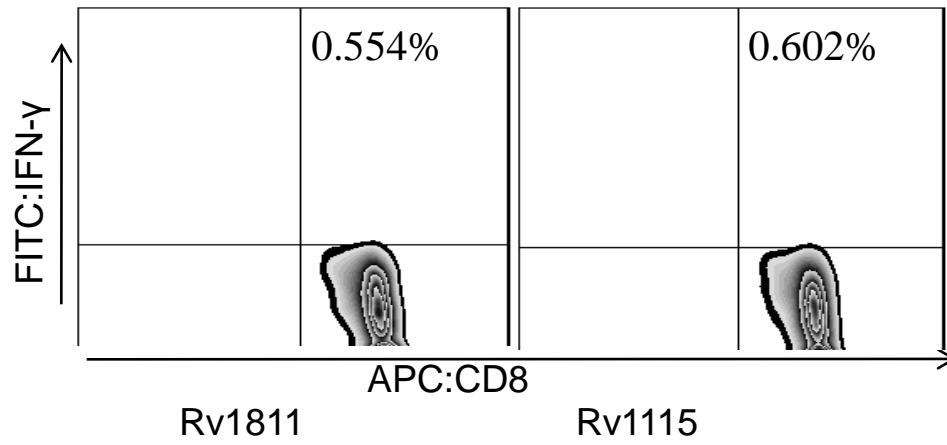

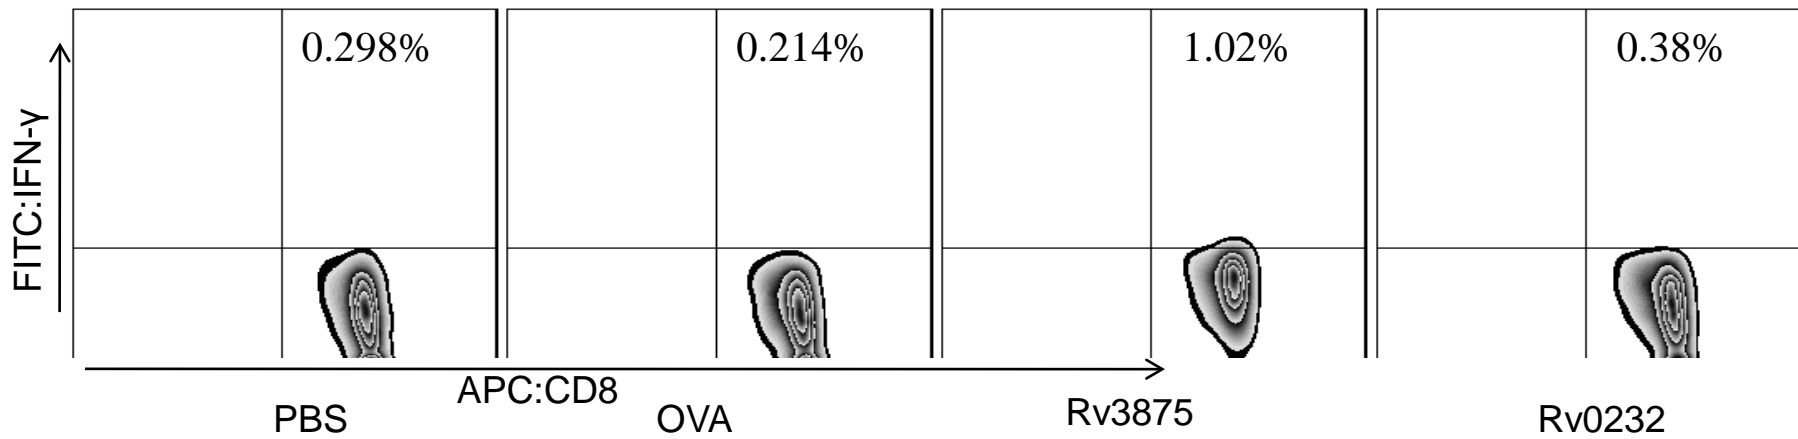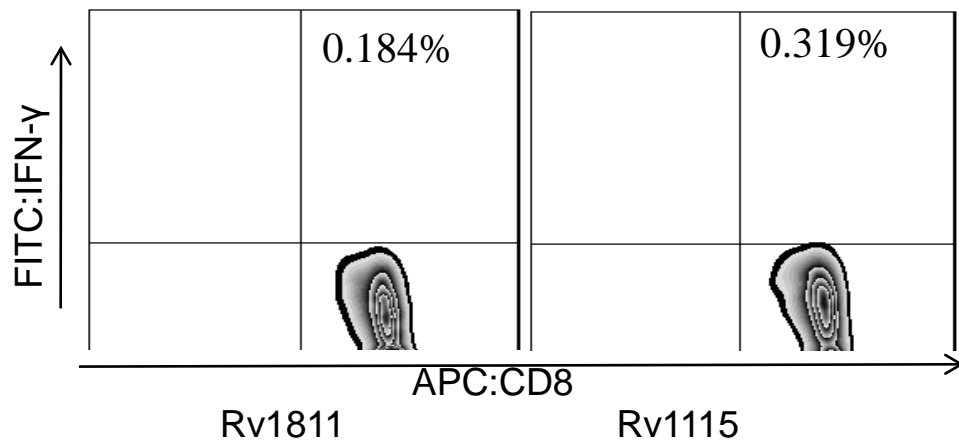



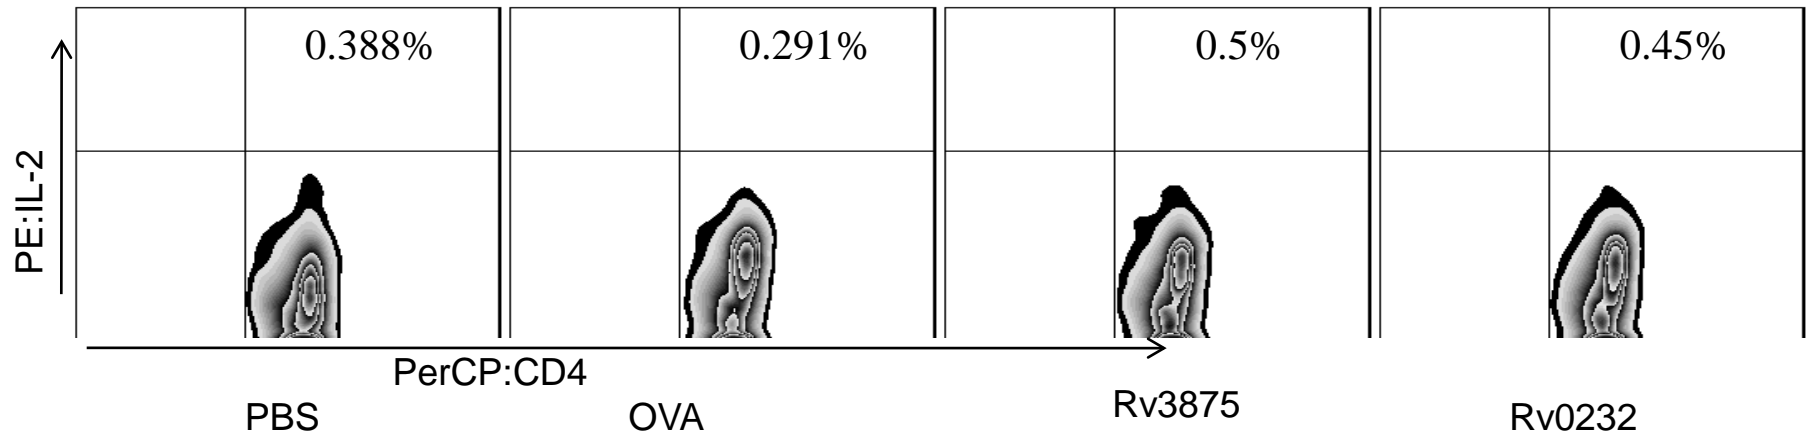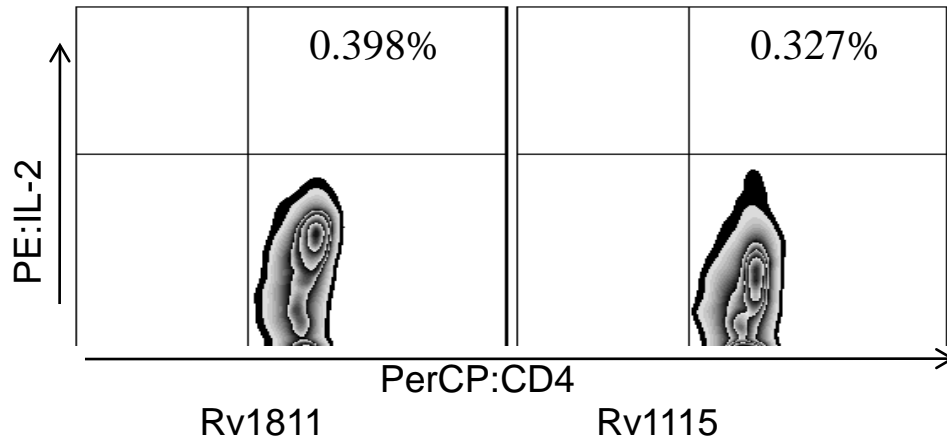

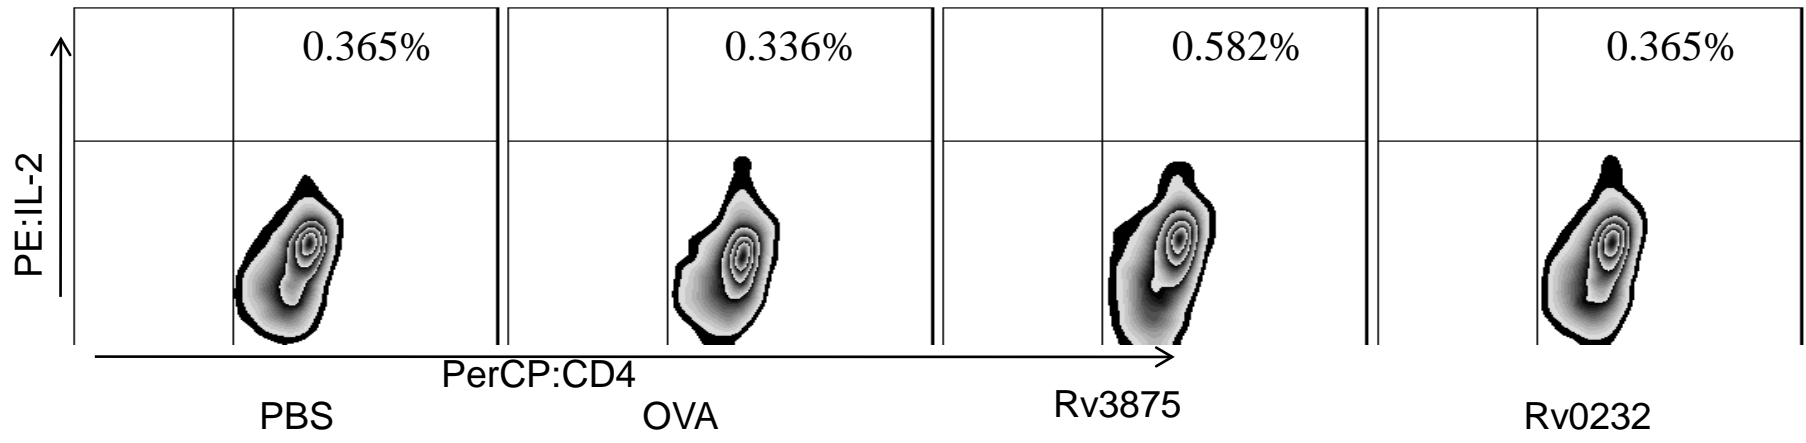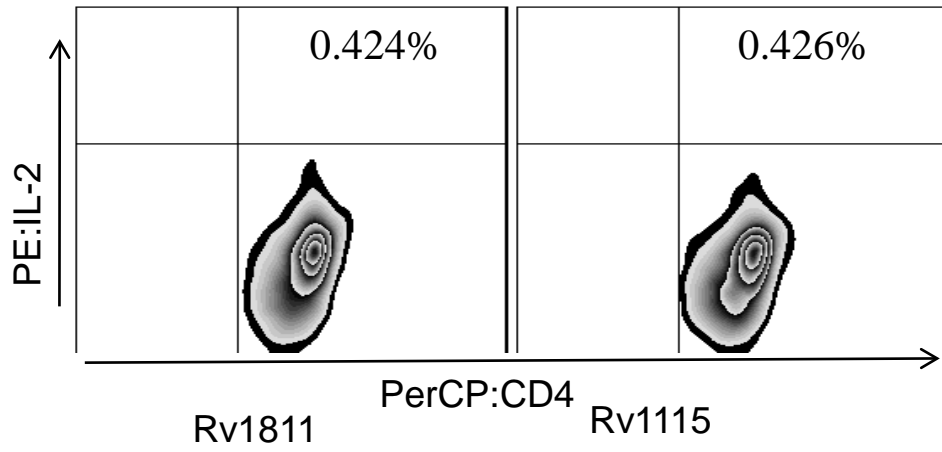

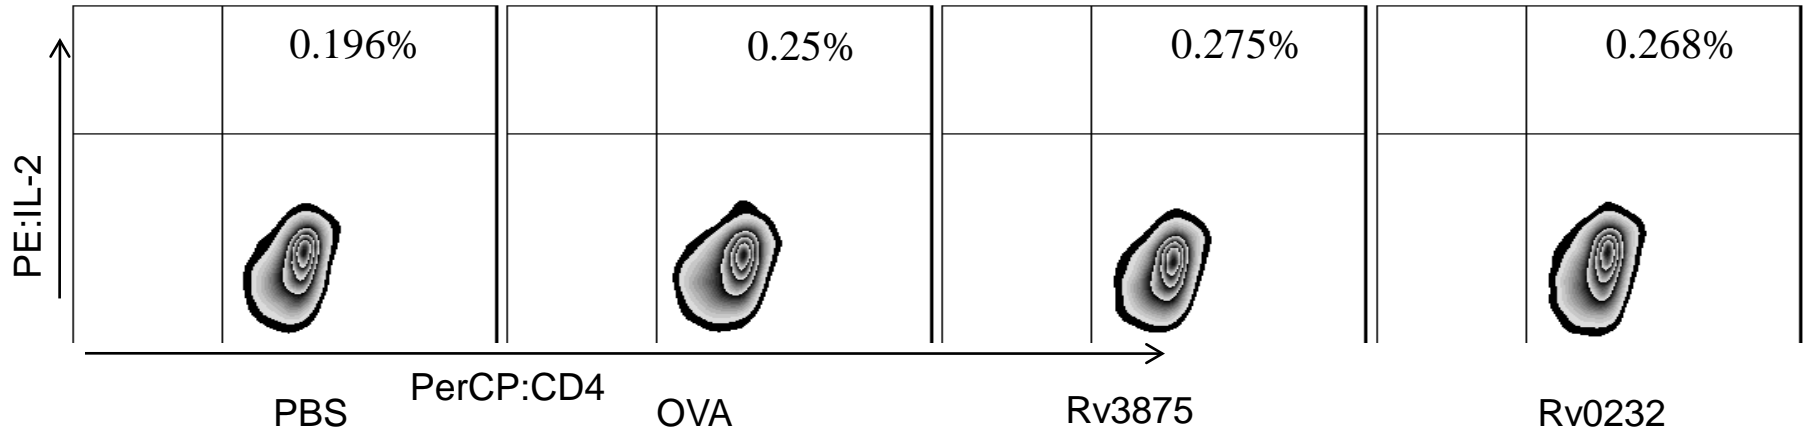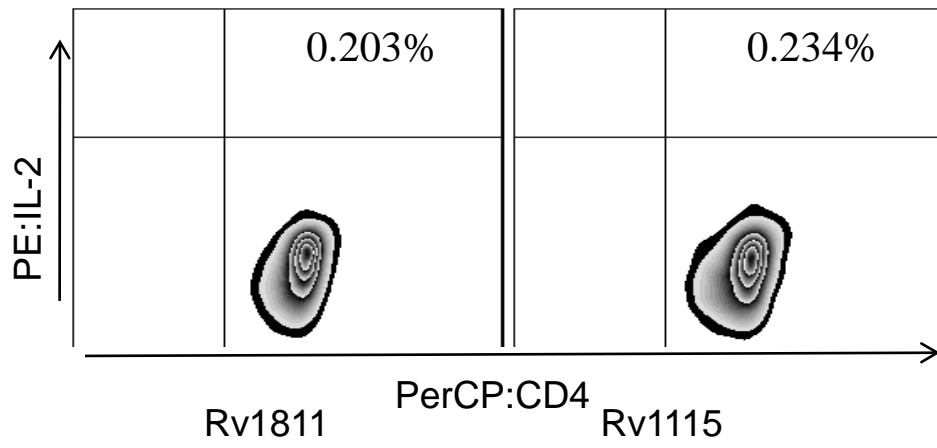

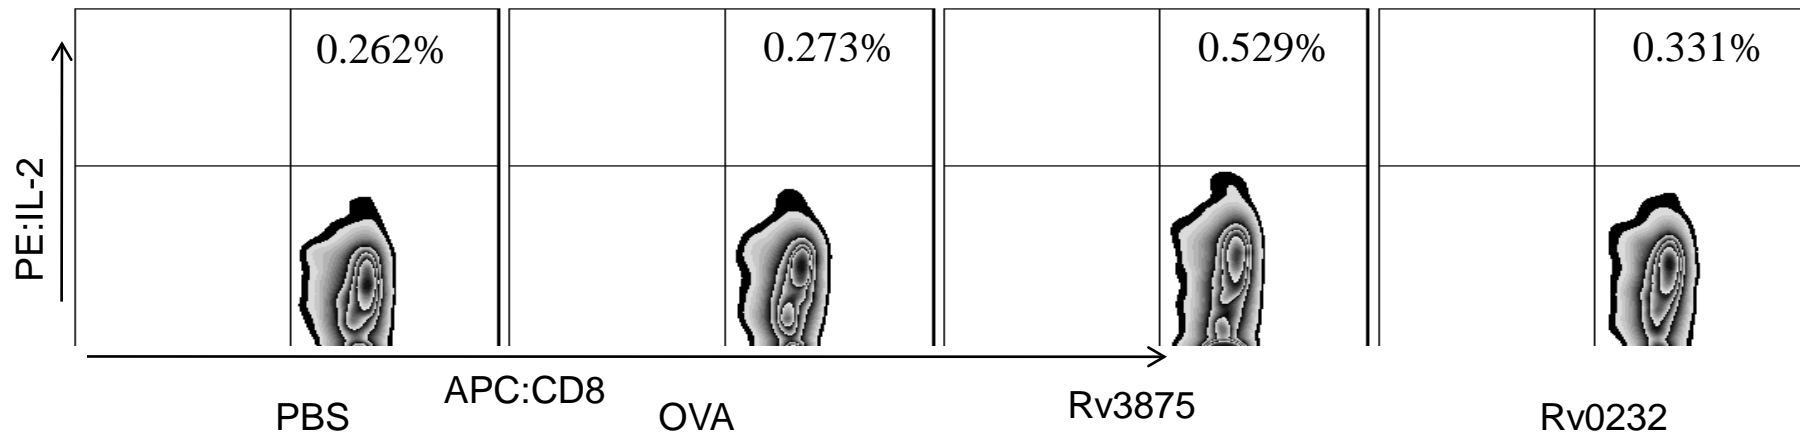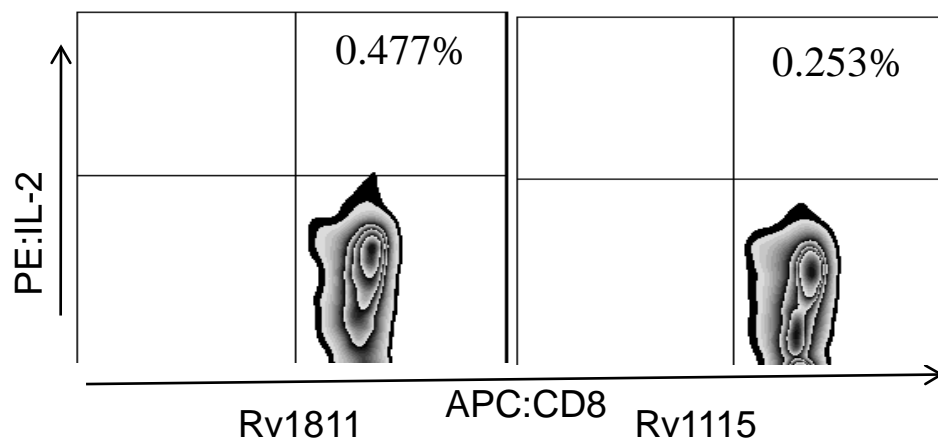

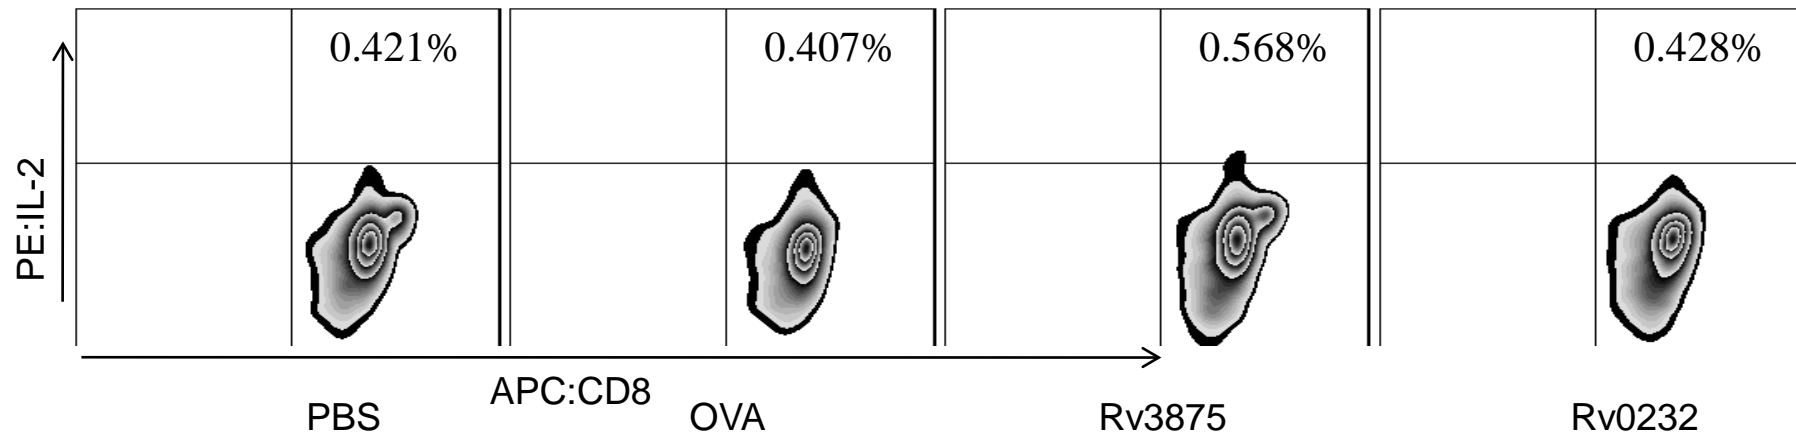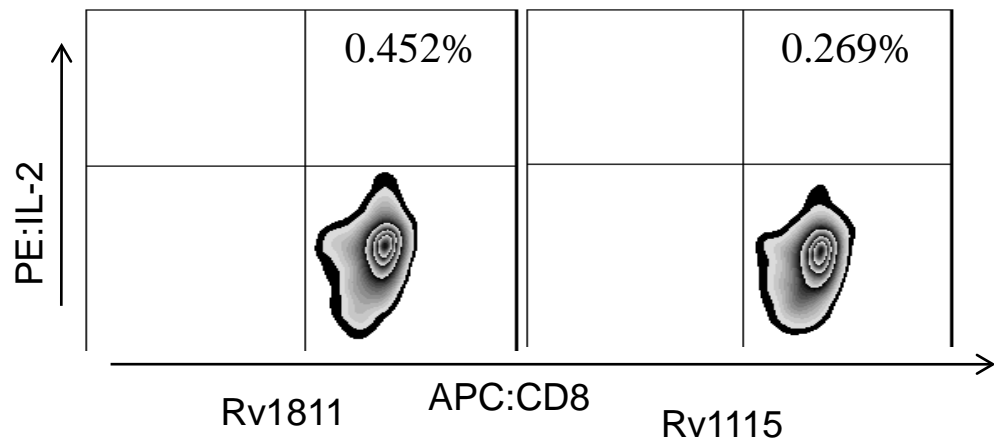

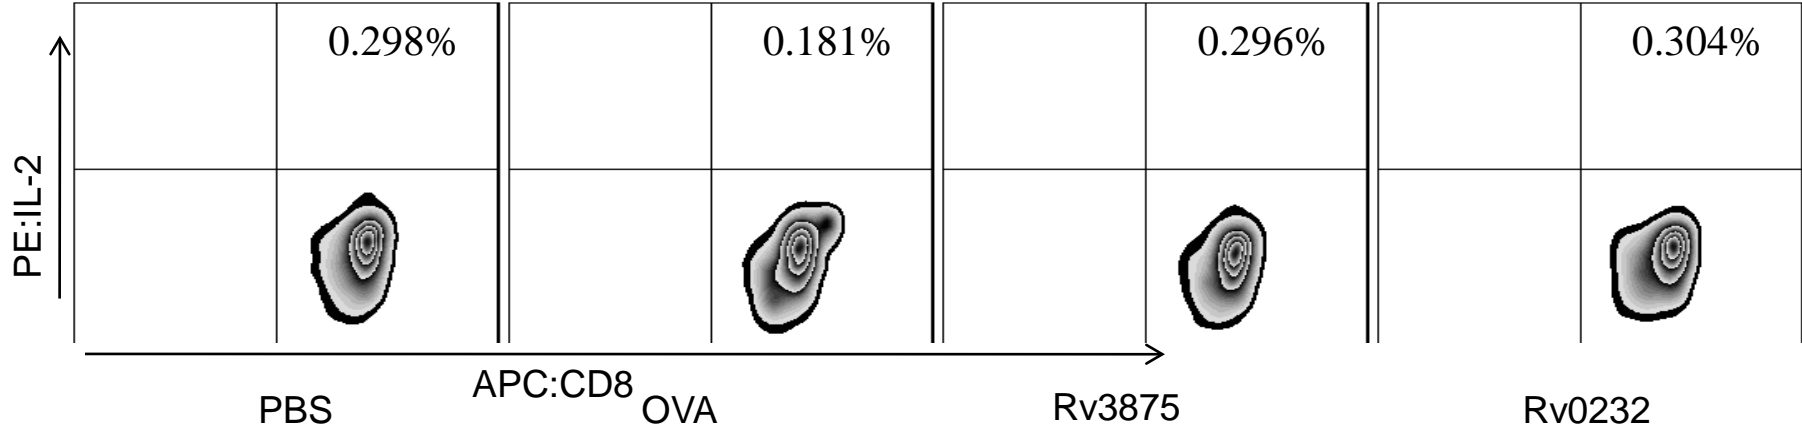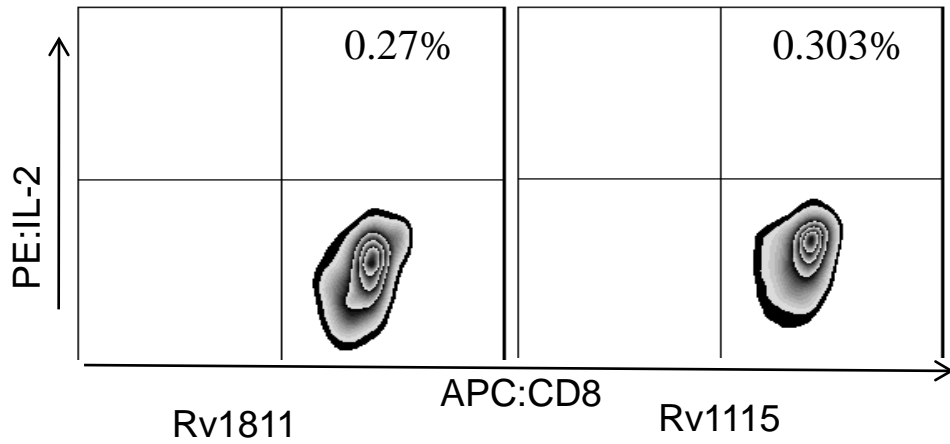

The data of T cell proliferation were stimulation by proteins.

| CD4+   |   |      |       |
|--------|---|------|-------|
| PBS    | 0 | 0.16 | 0     |
| OVA    | 0 | 0    | 0     |
| Rv3875 | 0 | 1.27 | 0.21  |
| Rv0232 | 0 | 3.36 | 0.383 |
| Rv1811 | 0 | 2.85 | 0     |
| Rv1115 | 0 | 0.74 | 0     |

| CD8+   |   |      |       |
|--------|---|------|-------|
| PBS    | 0 | 0.17 | 0     |
| OVA    | 0 | 0    | 0     |
| Rv3875 | 0 | 0    | 0.107 |
| Rv0232 | 0 | 0.47 | 0.37  |
| Rv1811 | 0 | 0    | 0     |
| Rv1115 | 0 | 0.36 | 0     |

The data of T cell proliferation were stimulation by PHA.

| CD4-PHA |       |      |       |
|---------|-------|------|-------|
| PBS     | 39.32 | 1.03 | 1.78  |
| OVA     | 37.38 | 0    | 0     |
| Rv3875  | 18.9  | 0.96 | 1.32  |
| Rv0232  | 56.63 | 0.58 | 0.245 |
| Rv1811  | 56.61 | 0.62 | 0.99  |
| Rv1115  | 59.49 | 1.47 | 1.77  |

| CD8-PHA |       |       |        |
|---------|-------|-------|--------|
| PBS     | 90.96 | 31.65 | 38.903 |
| OVA     | 80.98 | 25.29 | 12     |
| Rv3875  | 79.72 | 13.49 | 15.484 |
| Rv0232  | 85.76 | 21.61 | 19.84  |
| Rv1811  | 79.17 | 13.36 | 5.9    |
| Rv1115  | 88.02 | 20.18 | 19.8   |

The results of T cell proliferation were stimulation by proteins.

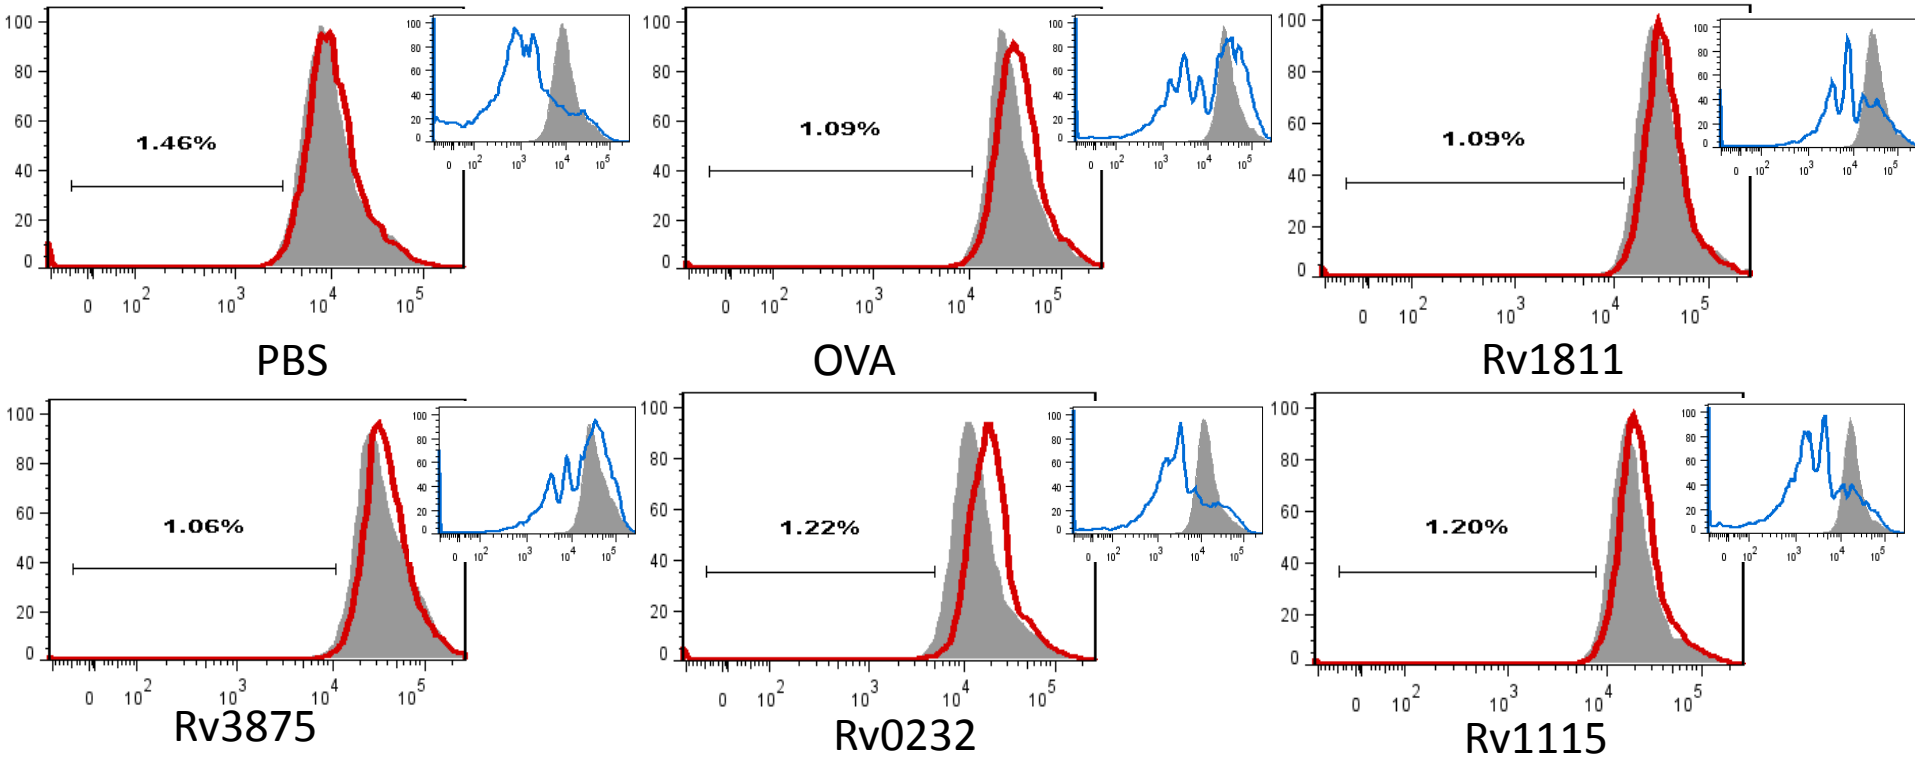

**First CD4+ proliferation**



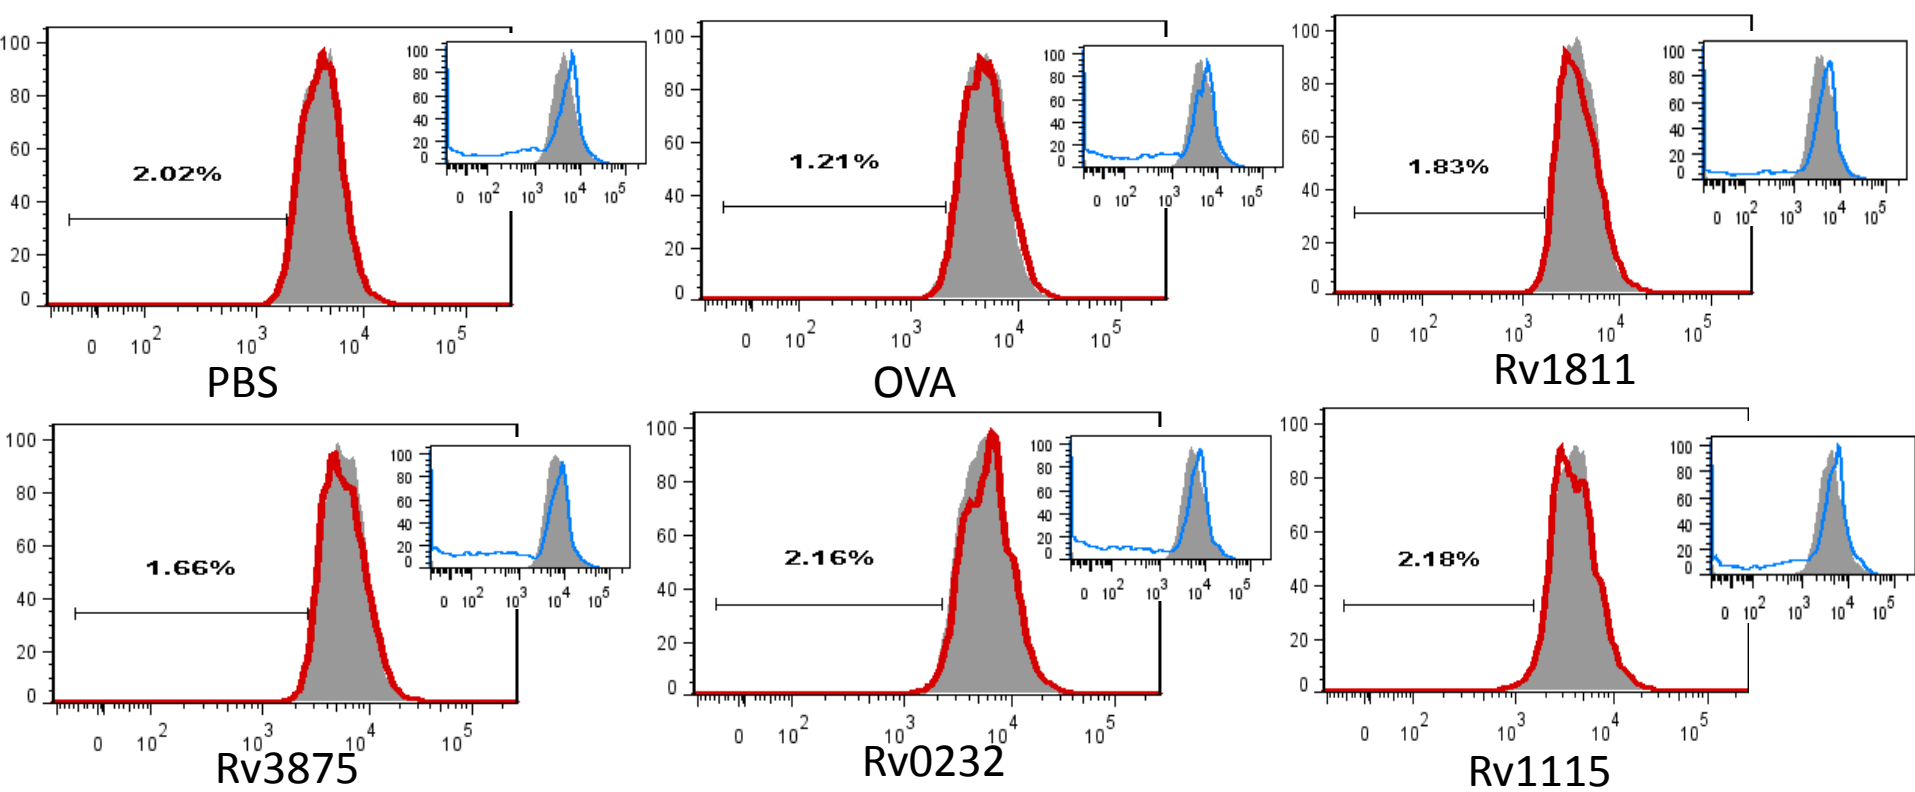

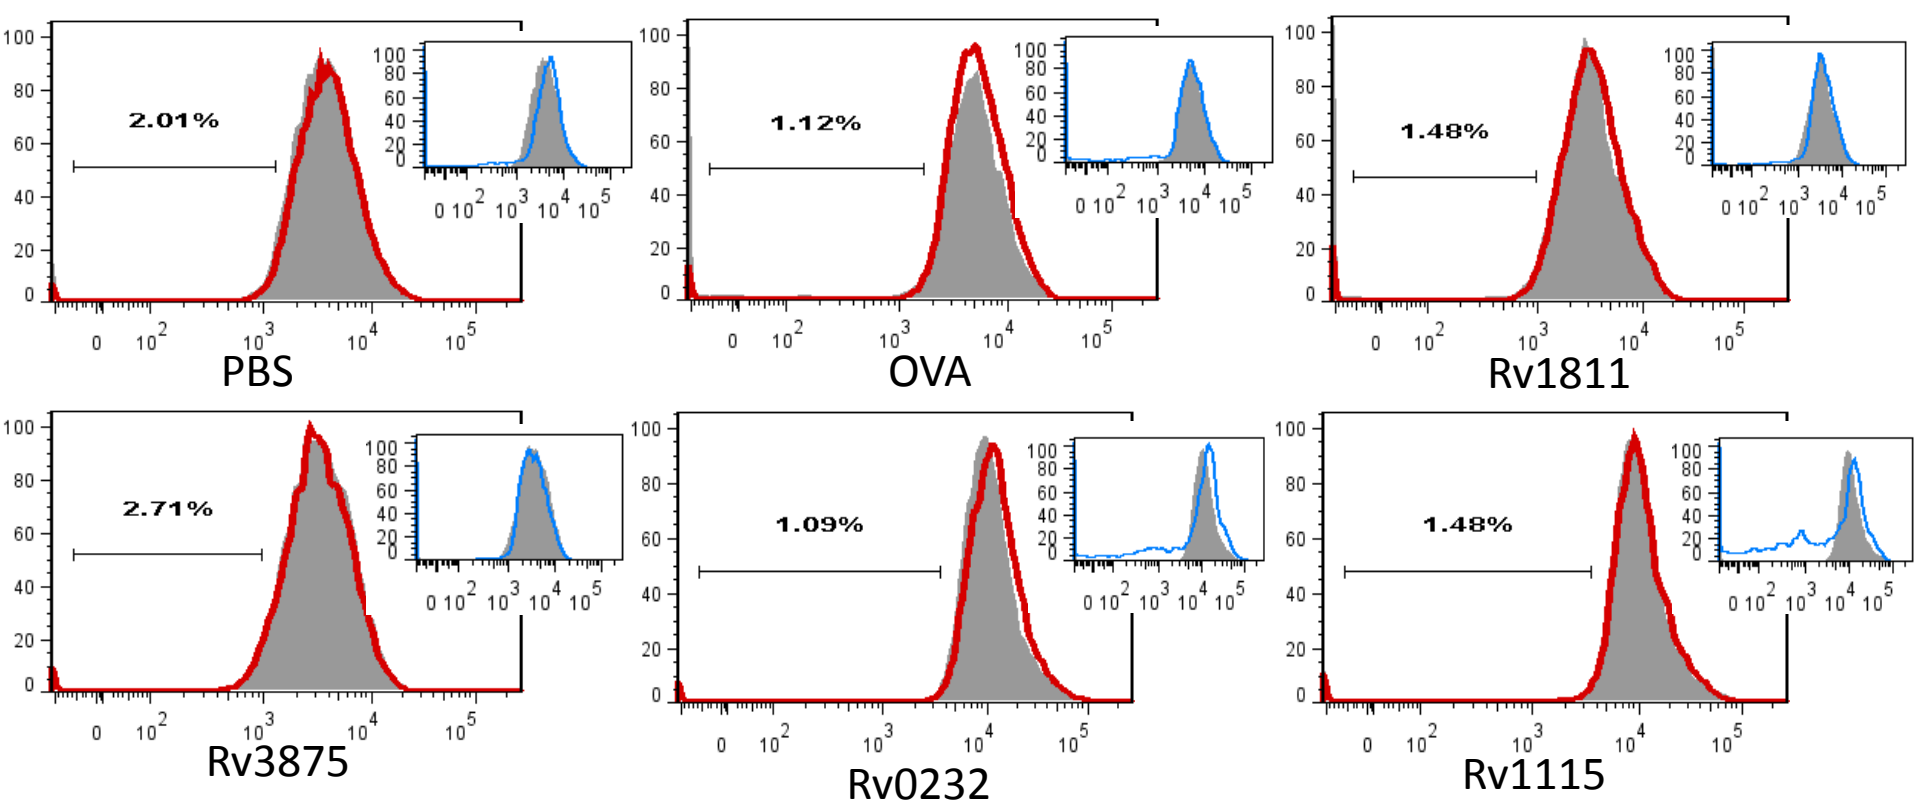

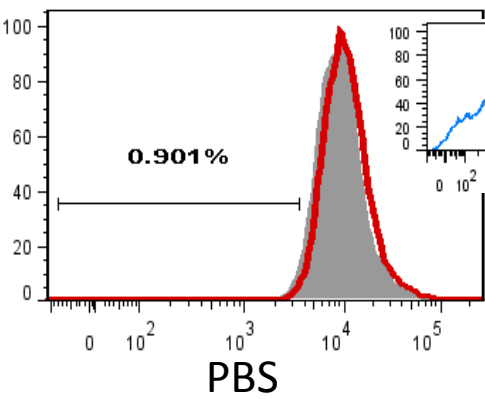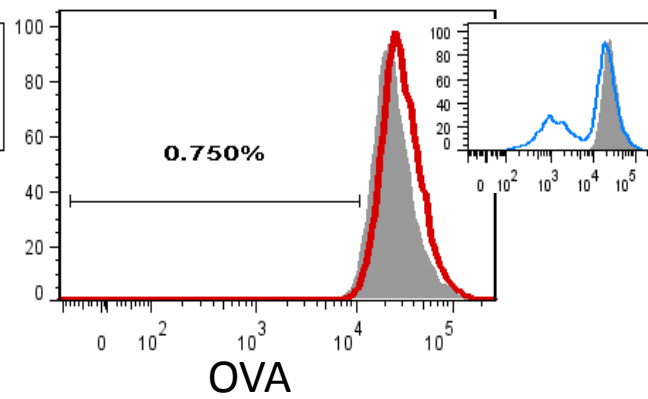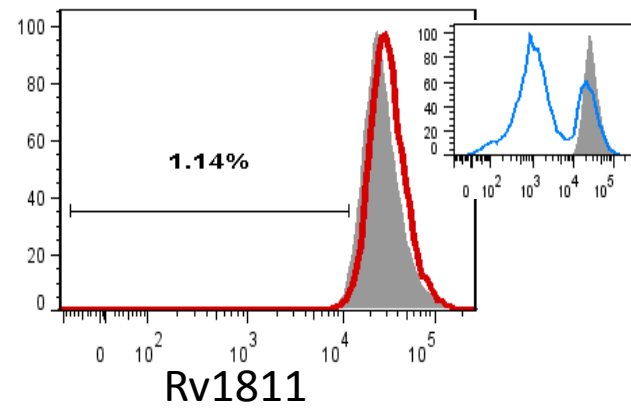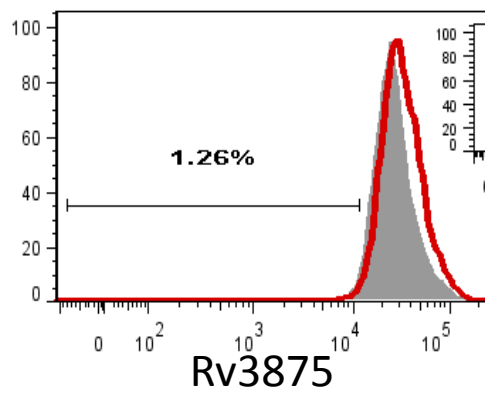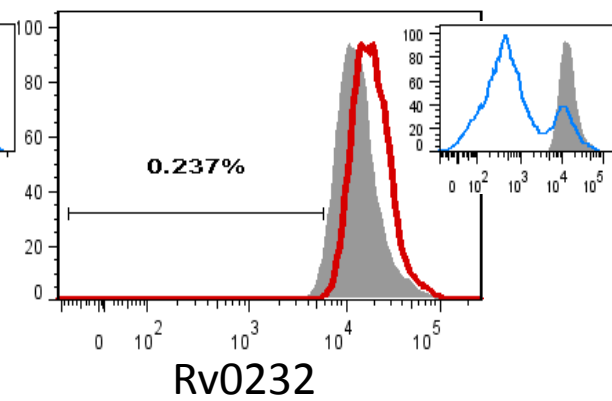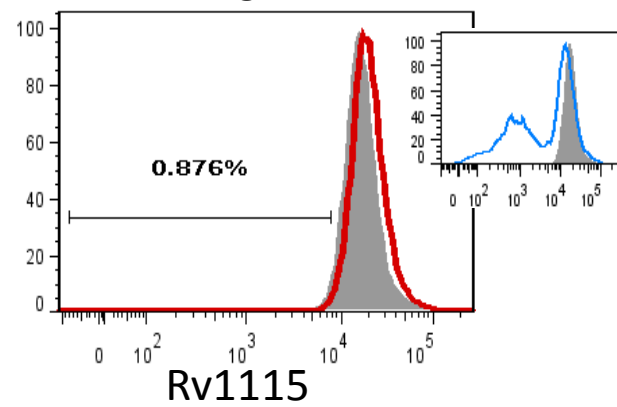

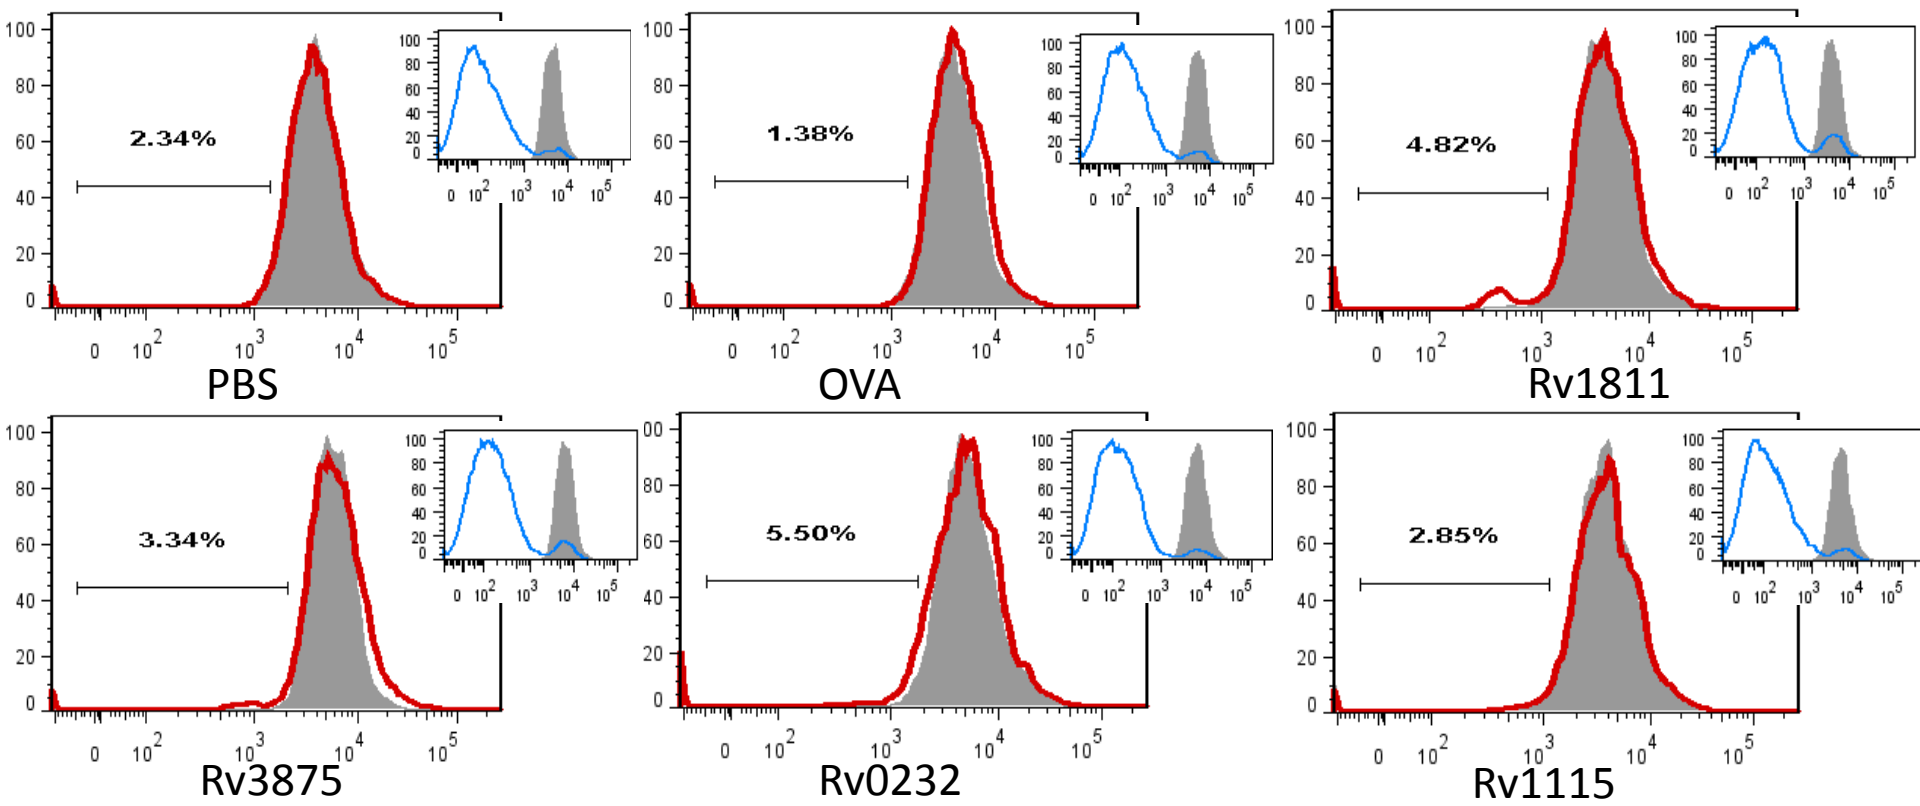

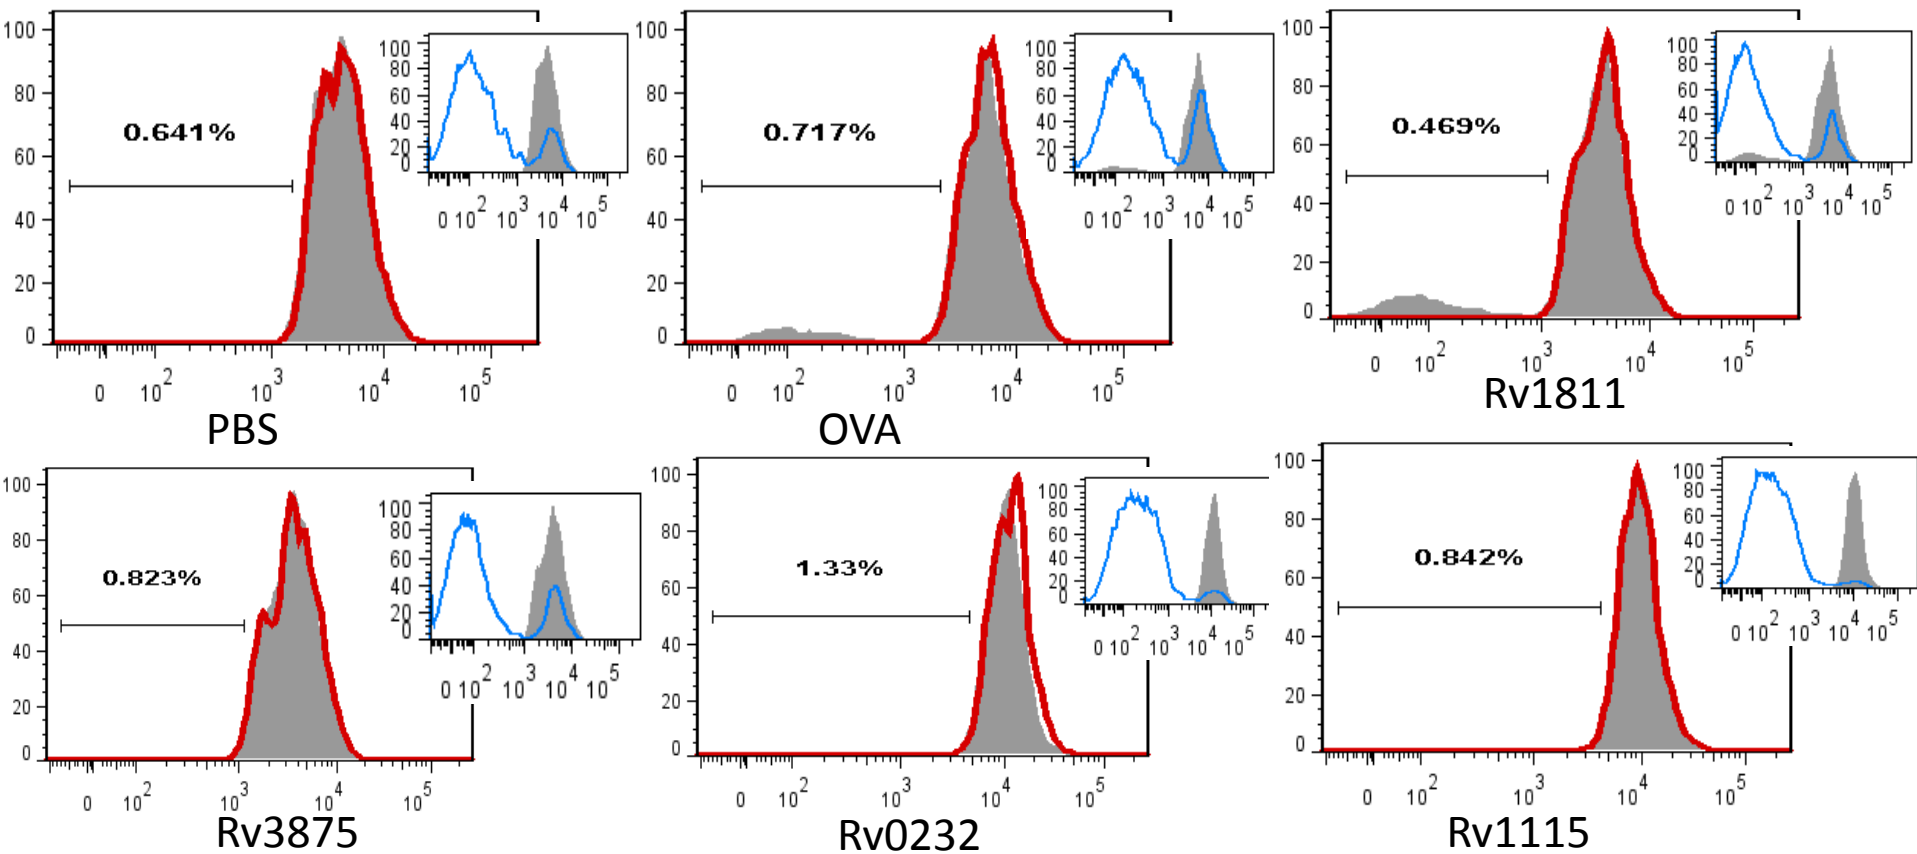

The data of cytokines were stimulation by PHA.

| GM-CSF |        |        |        |
|--------|--------|--------|--------|
| PBS    | 147.2  | 154.87 | 165    |
| OVA    | 122.99 | 155.17 | 136.68 |
| Rv3875 | 245.15 | 222.62 | 212.22 |
| Rv0232 | 532.73 | 552.66 | 500.82 |
| Rv1811 | 272.48 | 263.04 | 290.3  |
| Rv1115 | 305.62 | 341    | 329.12 |

| IFN- $\gamma$ |      |        |      |
|---------------|------|--------|------|
| PBS           | 3001 | 2885.7 | 2783 |
| OVA           | 3039 | 2985.7 | 2745 |
| Rv3875        | 4627 | 4883.7 | 4886 |
| Rv0232        | 6671 | 6385.7 | 6023 |
| Rv1811        | 3354 | 3685.7 | 3067 |
| Rv1115        | 6258 | 6085.7 | 6281 |

| IL-2   |        |        |       |
|--------|--------|--------|-------|
| PBS    | 97.86  | 80.76  | 90    |
| OVA    | 87.49  | 88.94  | 91.95 |
| Rv3875 | 166.17 | 187.32 | 171.3 |
| Rv0232 | 40.17  | 47.26  | 41.59 |
| Rv1811 | 37.96  | 36.43  | 32.31 |
| Rv1115 | 44.87  | 42.22  | 49.56 |

| IL-4   |       |       |       |
|--------|-------|-------|-------|
| PBS    | 6.99  | 8.75  | 7     |
| OVA    | 8.65  | 7.64  | 6.04  |
| Rv3875 | 11.04 | 11.1  | 10.19 |
| Rv0232 | 18.74 | 17.73 | 17.05 |
| Rv1811 | 22.51 | 21.76 | 21.53 |
| Rv1115 | 17.74 | 16.82 | 15.63 |

| IL-6   |       |        |        |
|--------|-------|--------|--------|
| PBS    | 35.18 | 37.9   | 40     |
| OVA    | 51.47 | 52.94  | 49.73  |
| Rv3875 | 81.2  | 77.87  | 94.74  |
| Rv0232 | 112.3 | 147.83 | 113.14 |
| Rv1811 | 42.83 | 43.62  | 31.34  |
| Rv1115 | 410.5 | 501.1  | 432.66 |

| IL-12P40 |   |   |   |
|----------|---|---|---|
| PBS      | 0 | 0 | 0 |
| OVA      | 0 | 0 | 0 |
| Rv3875   | 0 | 0 | 0 |
| Rv0232   | 0 | 0 | 0 |
| Rv1811   | 0 | 0 | 0 |
| Rv1115   | 0 | 0 | 0 |

| IL-17  |        |        |        |
|--------|--------|--------|--------|
| PBS    | 391.11 | 321    | 400    |
| OVA    | 428.86 | 404.17 | 379.9  |
| Rv3875 | 793.56 | 863.94 | 767.96 |
| Rv0232 | 1566   | 1800   | 1848.2 |
| Rv1811 | 851.28 | 613.97 | 692.7  |
| Rv1115 | 421.9  | 417.95 | 422.41 |

| IP-10  |        |        |        |
|--------|--------|--------|--------|
| PBS    | 540.83 | 595.01 | 490    |
| OVA    | 561.22 | 562.13 | 635.16 |
| Rv3875 | 1199.9 | 1006.1 | 1123.5 |
| Rv0232 | 794.29 | 818.56 | 742.38 |
| Rv1811 | 552.05 | 477.76 | 465.89 |
| Rv1115 | 898.67 | 879.49 | 919.57 |

| TNF- $\alpha$ |       |        |       |
|---------------|-------|--------|-------|
| PBS           | 52.62 | 47.05  | 50    |
| OVA           | 46.04 | 47.53  | 52.14 |
| Rv3875        | 84.51 | 101.72 | 99.01 |
| Rv0232        | 97.83 | 85.74  | 67.73 |
| Rv1811        | 62.78 | 87.26  | 75.61 |
| Rv1115        | 64.37 | 81.85  | 72.17 |

The data of cytokines were stimulation by proteins.

| GM-CSF |      |       |      |
|--------|------|-------|------|
| PBS    | 0    | 0     | 0    |
| OVA    | 2.1  | 1     | 1.73 |
| Rv3875 | 7.73 | 17.04 | 10   |
| Rv0232 | 36   | 52.77 | 43.1 |
| Rv1811 | 6.5  | 4     | 2.57 |
| Rv1115 | 6.07 | 7     | 9.27 |

| IFN- $\gamma$ |      |        |        |
|---------------|------|--------|--------|
| PBS           | 0    | 0      | 0      |
| OVA           | 0    | 0      | 0      |
| Rv3875        | 1.83 | 0      | 0.7    |
| Rv0232        | 388  | 414.81 | 406.49 |
| Rv1811        | 0.3  | 0.94   | 0.7    |
| Rv1115        | 20   | 28     | 36.43  |

| IL-2   |       |       |       |
|--------|-------|-------|-------|
| PBS    | 0     | 0     | 0     |
| OVA    | 2     | 1.42  | 1     |
| Rv3875 | 5.56  | 6.95  | 6     |
| Rv0232 | 24.19 | 20.91 | 25.78 |
| Rv1811 | 0.7   | 0.6   | 0.75  |
| Rv1115 | 5     | 6.05  | 5.59  |

| IL-4   |     |      |      |
|--------|-----|------|------|
| PBS    | 0   | 0    | 0    |
| OVA    | 0   | 0    | 0    |
| Rv3875 | 0.6 | 1.17 | 0.7  |
| Rv0232 | 2   | 3.03 | 3    |
| Rv1811 | 0   | 0    | 0    |
| Rv1115 | 1.8 | 2.2  | 2.25 |

| IL-6   |        |        |        |
|--------|--------|--------|--------|
| PBS    | 0      | 0      | 0      |
| OVA    | 2.3    | 2.8    | 2.2    |
| Rv3875 | 41.2   | 35.6   | 42.17  |
| Rv0232 | 642.37 | 722.43 | 674.98 |
| Rv1811 | 13.46  | 13.19  | 10     |
| Rv1115 | 45.99  | 38.43  | 47.83  |

| IL-12P40 |      |      |      |
|----------|------|------|------|
| PBS      | 0    | 0    | 0    |
| OVA      | 0    | 0    | 0    |
| Rv3875   | 0.74 | 0.5  | 0.6  |
| Rv0232   | 1.6  | 1.2  | 1.53 |
| Rv1811   | 0    | 0    | 0    |
| Rv1115   | 2.7  | 3.16 | 3.03 |



| IL-17  |      |      |        |
|--------|------|------|--------|
| PBS    | 0    | 0    | 0      |
| OVA    | 0    | 0    | 0      |
| Rv3875 | 0    | 0    | 0      |
| Rv0232 | 1200 | 1343 | 1254.8 |
| Rv1811 | 0    | 0    | 0      |
| Rv1115 | 20   | 18.5 | 17.54  |

| IP-10  |        |        |       |
|--------|--------|--------|-------|
| PBS    | 0      | 0      | 0     |
| OVA    | 0      | 0      | 0     |
| Rv3875 | 10.12  | 12.99  | 12.9  |
| Rv0232 | 103.68 | 101.77 | 83.43 |
| Rv1811 | 6.31   | 5.03   | 6.85  |
| Rv1115 | 46.29  | 50.9   | 64.01 |

| TNF- $\alpha$ |       |       |       |
|---------------|-------|-------|-------|
| PBS           | 0     | 0     | 0     |
| OVA           | 0     | 0     | 3.2   |
| Rv3875        | 18.22 | 35.55 | 28.66 |
| Rv0232        | 27.01 | 32.46 | 38.12 |
| Rv1811        | 78.62 | 89.95 | 59.02 |
| Rv1115        | 35.28 | 34.28 | 25.61 |
